# Supplementary material for: Identification of novel metagenomic lipases through integrated structural and sequence-based analysis
Source: PeerJ. 2026 Feb 2;14:e20462. doi: 10.7717/peerj.20462 (PMC12875215; doi:10.7717/peerj.20462)
Supplement: Supplemental Information 2 [file peerj-14-20462-s002.xlsx]

## Sheet: TS1
Supplementary Table 1. Foldseek results
Query	Target	alnLength	missmatches	gapoopened	qStartPos	qEndPos	dbStartPos	dbEndPos	prob	eval	score	qLen	dbLen	qAln	dbAln	tCa	tSeq
1DT3	MGYP000007559849	217	133	10	1	193	8	200	1	4.564e-08	210	269	207	EVSQDLFNQFNLFAQYSAAAYCGKNNDAPAGTNITCTGNACPEVE-------KADATFLYSFEDSGVGDVTGFLALDNTNKLIVLSFRGSRSIENWIGNLNFDLKEIN-DICSG----------CRGHDGFTSS-WRSVADTLRQKVEDAVREHPDYRVVFTGHSLGGALATVAGADL-----RGNGYDIDVFSYGAPRVGNRAFAEFLTVQTGGTL	ELDDAEIRLTCAICSMGAY-----------------SDDESY-LMRSMLTSRGWQIEKISRKNNLA--DAKAYLVSK--GDVKILTIAGTESLKDVEVDFRLGRVTLNKDSVPLAAEDKNSGDKIFVHRGFRDYADVVLGDGLAERLKASLIKNPRETLYITGHSLGGAVAIVAAIRLADMGVTKNHLKVI--TFGSPAVGSHALANFYSSRIDLTR	-18.353,-8.461,30.799,-19.786,-9.559,27.530,-17.039,-9.122,24.938,-18.812,-7.721,22.133,-17.368,-9.665,19.360,-15.943,-7.217,17.106,-18.165,-7.394,14.303,-16.256,-8.269,11.317,-16.187,-5.285,9.182,-17.946,-6.083,5.976,-16.129,-5.756,2.623,-18.122,-2.615,1.652,-17.161,-0.769,4.912,-13.479,-1.690,4.369,-13.572,-0.444,0.697,-15.286,2.777,1.765,-12.761,3.258,4.595,-9.867,2.651,2.115,-11.412,5.250,-0.…	VATCAASELDDAEIRLTCAICSMGAYSDDESYLMRSMLTSRGWQIEKISRKNNLADAKAYLVSKGDVKILTIAGTESLKDVEVDFRLGRVTLNKDSVPLAAEDKNSGDKIFVHRGFRDYADVVLGDGLAERLKASLIKNPRETLYITGHSLGGAVAIVAAIRLADMGVTKNHLKVITFGSPAVGSHALANFYSSRIDLTRAVMKGDV
1DT3	MGYP000016393174	220	126	11	12	222	17	208	1	4.102e-09	276	269	260	LFAQYSAAAYCGKNNDAPAGTNITCTGNACPEVEKADATFLYSFEDSGVGDVTGFLALDNTNKLIVLSFRGSRSIENWIGNLNFDLKEINDIC----SGCRGHDGFTSSWRSVADTLRQKVEDAVREH--PDY--RVVFTGHSLGGALATVAGADL-RGNGYDIDVFSYGAPRVGNRAFAEFLTVQTGGTLYRITHTNDIVPRLPPREFGYSHSSPEYWI	LHAALAAAAACKA-AYAPVPHSNT-------------TRVLY-RNDSA------DLTWCGHAKHLIIAVRGSDDRADWWSNLDASHIPL--ITGSGNTGLRVHRGFYESSL----GLARNIFNAAAQITDRDFPRKVTLTGHSRGAGIVPHVAMQLGFPGFPCVQSFLFGAPRTGNRAWAAEYDAAFP-DTWRVVNCGDLVTRLPRPWMSYWHVGRFAYI	9.014,16.125,-16.044,9.102,14.638,-12.628,5.801,13.304,-11.916,5.024,14.034,-8.352,1.731,14.083,-6.786,1.178,16.855,-4.427,2.427,15.800,-1.118,-0.050,15.753,1.615,0.397,18.112,4.502,2.433,17.161,7.513,0.743,15.085,10.130,0.786,16.390,13.582,0.354,13.055,15.114,3.596,11.962,13.749,4.314,8.740,11.868,3.534,5.620,14.067,6.959,4.113,13.409,6.489,0.947,15.689,3.099,0.150,14.082,4.639,0.672,10.618,7.56…	MIDLDPLPPADPRGFPLHAALAAAAACKAAYAPVPHSNTTRVLYRNDSADLTWCGHAKHLIIAVRGSDDRADWWSNLDASHIPLITGSGNTGLRVHRGFYESSLGLARNIFNAAAQITDRDFPRKVTLTGHSRGAGIVPHVAMQLGFPGFPCVQSFLFGAPRTGNRAWAAEYDAAFPDTWRVVNCGDLVTRLPRPWMSYWHVGRFAYIDRRRKVHTAATGYPRITADRLFASLNDIGRPGVASIRAHYIDAYMAALGAAT
1DT3	MGYP000016913979	205	127	13	12	194	6	195	1	1.206e-06	187	269	203	LFAQYSAAAYCGKNNDAPAGTNITCTGNACP--EVEKADATFLYS-FEDSGVGD-VTGFLALDNTNKLIVLSFRGS----------RSIENWIGNLNFDLKEINDICSGC-RGHDGFTSSWRSVADTLRQKVEDAVREHPDYRVVFTGHSLGGALATVAGAD------LRGNGYDIDVFSYGAPRVGNRAFA-EFLTVQTGGTLY	LEGRLLCASNVAYDVLE----DGAVRTR-PPYYEGTGF---IEAPAGLCRGPKVIDAAFV--GRTADGVILAFRGTLPGPYTNSPEQTLDDWFQELEFGLGKG---ANLPGLVHIGFRSALDFLWDDVLRMVTSQLAGSGLRRLLITGHSKGGALANLAAARFVTLGVVSSAEVIVC--TFAAPHPGDIAFANEYRILVPAAARY	-2.963,-23.734,15.589,-2.672,-20.274,17.079,-4.586,-17.701,15.117,-2.236,-15.615,13.024,-1.297,-12.169,14.255,-2.602,-9.133,12.282,0.981,-8.760,10.845,1.031,-12.457,9.768,-2.315,-11.977,7.987,-1.090,-8.814,6.264,2.138,-10.668,5.216,-0.137,-13.368,3.724,-2.226,-10.707,1.932,1.014,-9.178,0.501,1.800,-12.611,-0.987,-1.733,-12.993,-2.432,-1.124,-9.828,-4.414,1.595,-11.813,-6.388,-0.809,-14.575,-7.203…	MTAPTLEGRLLCASNVAYDVLEDGAVRTRPPYYEGTGFIEAPAGLCRGPKVIDAAFVGRTADGVILAFRGTLPGPYTNSPEQTLDDWFQELEFGLGKGANLPGLVHIGFRSALDFLWDDVLRMVTSQLAGSGLRRLLITGHSKGGALANLAAARFVTLGVVSSAEVIVCTFAAPHPGDIAFANEYRILVPAAARYEFRDDIGP
1DT3	MGYP000024962517	256	152	18	2	242	68	280	1	8.706e-06	159	269	331	VSQDLFNQFNLFAQYSAAAY---CGKNNDAPAGTNITCTGNACPEVEKADATFLYSFEDSGVGDVTGFLALDNTNKLIVLSFRGSRSIENW-IGNL-NFDLKEINDICSGCRGHDGFTSS-WRSVADTLRQKVEDAVREHPDYRVVFTGHSLGGALATVAGADLRGNGYDIDV-FSYGAPRVGNRAFAEFLTVQTG----GTLYRITHTNDIV--PRLPPREFGYSHSSPEYWI--KSGTLVPVTRNDIVKIEGID	LSQNITTKTLHAAELTRLTYSIKRFRIWRAP----IP-EGN-----------FETMDE-FADVDD--GALVARLDNVCYVGFQSTRATNVFDIWQLFDKSEQSI----AGCKVRRGFYRGYYTCYYDNFLEKVEECM-APEGSELVVTGHSQGGSVAMMAFLDLQKYNPIAIAFGS--LPAF---------QEHCNSIDSSRIYRFSNTGDHWYDTYANSKQIEGVHMGESILLDAVSTS--------PAVYLGLD	37.190,12.831,-26.643,38.399,9.782,-24.920,35.638,7.748,-23.311,37.559,6.117,-20.531,37.648,2.314,-20.726,37.102,2.174,-17.061,33.517,1.779,-17.240,33.587,-1.433,-18.933,35.283,-3.194,-16.143,32.726,-2.337,-13.664,30.027,-3.688,-15.692,31.732,-6.963,-16.096,32.217,-7.344,-12.484,28.742,-6.936,-11.901,27.815,-9.405,-14.469,30.008,-11.908,-12.938,28.413,-11.360,-9.773,25.144,-11.772,-11.371,26.036,…	MECPARTLFLVFGLWLCFLDFVHCEEGRLRGGQQQQRQEQDQWQRRVSTSRFRTDGCQNGARLSNFQLSQNITTKTLHAAELTRLTYSIKRFRIWRAPIPEGNFETMDEFADVDDGALVARLDNVCYVGFQSTRATNVFDIWQLFDKSEQSIAGCKVRRGFYRGYYTCYYDNFLEKVEECMAPEGSELVVTGHSQGGSVAMMAFLDLQKYNPIAIAFGSLPAFQEHCNSIDSSRIYRFSNTGDHWYDTYANSKQIEGVHMGESILLDAVSTSPAVYLGLDESTLRTPKTIFVHPFDLYENALTAMVDKAQAECPDSPVRLRGWEDGHWCTR
1DT3	MGYP000026482621	214	147	13	1	193	1	205	1	2.618e-08	258	269	206	EVSQDLFNQFNLFAQYSAAAY-CGKNNDAPAGTN-------ITC-TGNACPEVEK---ADATFLYSFEDSGV-GDVTGFLALDNTNKLIVLSFRGSRSIE--NWIGNLNFDLKEINDICSGCRGHDGFTSSW--RSVADTLRQKVEDAVREHPDYRVVFTGHSLGGALATVAGADL---RGNGYD-IDVFSYGAPRVGNRAFAEFLTVQTGGTL	MLDKTNLCEYIHSAALSKIIYSINVKLKYNDNESFIDNVKKLVNPYSKASSVINKFFPDDE---YVKYISSPKTGLDSLVSVNKNLKKIYVTFRGT-EIETIDTFYNIMIIKKSL---DHCVDIHNGYWNHLTHNNIHMKIIKIITDILQNNPDYTIDISGHSLGGGLSLIFSYILINELPSFEGKISTTLFGTPSISNKEIFNFL--KHFISF	-1.644,-24.759,5.231,-2.758,-21.239,5.071,-5.386,-20.547,7.617,-8.645,-19.728,5.798,-8.664,-16.327,7.416,-5.367,-15.391,5.896,-6.537,-16.571,2.495,-9.491,-14.182,2.640,-7.222,-11.283,3.427,-5.006,-12.199,0.465,-7.836,-12.406,-1.860,-8.934,-8.988,-0.654,-5.495,-7.350,-1.057,-5.144,-8.978,-4.508,-8.568,-7.675,-5.484,-7.641,-4.132,-4.379,-4.358,-4.405,-6.254,-6.333,-5.247,-9.363,-9.095,-2.613,-8.884…	MLDKTNLCEYIHSAALSKIIYSINVKLKYNDNESFIDNVKKLVNPYSKASSVINKFFPDDEYVKYISSPKTGLDSLVSVNKNLKKIYVTFRGTEIETIDTFYNIMIIKKSLDHCVDIHNGYWNHLTHNNIHMKIIKIITDILQNNPDYTIDISGHSLGGGLSLIFSYILINELPSFEGKISTTLFGTPSISNKEIFNFLKHFISFD
1DT3	MGYP000034133422	177	111	9	63	210	5	175	1	4.72e-06	175	269	176	VTGFLALDNTNK--LIVLSFRGSRSIENWIGNLNFDLKEINDI---CSGCRGHD----GFTSSWRSVADTLRQKVEDAVREHPDYRVVFTGHSLGGALATVAGAD----LRGNG----------YDIDVFSYGAPRVGNRAFA-----EFLT-VQTGGTLYRITHTNDIVPRLPPRE	FAALIVEPVDAEDRILILAWRGSVTAFDFLNDVALSPTLSSRWSDETEDIRAHGAIVNLVEHAFSLHEDAIVQ----LIEKHKVERAFFTGHSLGGGLANVAHLVVRGQLQKAGSPWAELNNIKLALSACTFAAPQTIVRLYEADPPPQLVVDLDASSYN--IVYGCDAVPQIGRAH	11.737,-16.171,1.393,11.593,-13.271,3.718,8.307,-11.540,3.341,8.397,-8.134,1.900,6.374,-6.914,4.790,5.459,-7.329,8.440,1.967,-7.292,9.817,1.268,-5.973,13.236,-1.974,-5.476,15.124,-1.959,-2.662,17.583,-4.551,-2.253,20.311,-4.641,1.134,21.561,-5.278,1.315,25.277,-8.204,3.631,25.022,-9.449,3.057,21.766,-11.857,0.678,20.579,-10.324,0.856,17.287,-7.959,-1.842,16.448,-5.237,-0.928,13.967,-3.490,-3.222,…	AIPPFAALIVEPVDAEDRILILAWRGSVTAFDFLNDVALSPTLSSRWSDETEDIRAHGAIVNLVEHAFSLHEDAIVQLIEKHKVERAFFTGHSLGGGLANVAHLVVRGQLQKAGSPWAELNNIKLALSACTFAAPQTIVRLYEADPPPQLVVDLDASSYNIVYGCDAVPQIGRAHV
1DT3	MGYP000034230895	170	99	9	74	234	32	180	1	3.24e-06	183	269	191	KLIVLSFRGSRSIENWIGN----LNFDLKEINDICSGCRGHDGFTSSWRSVADTLRQKVEDAVREHPDYRVVFTGHSLGGALATVAGADLRGNG---YDIDVFSYGAPRVGNRAFAEF-LTVQTGGTLYRITHTNDIVPRLPPREFGYSHSSP-EYWIKSGTLVPVTRND	DKVLIACAGTEDIADWLTNFAFLFNRDM-----------VHRGFSNN----AFRIMPLVLNKV--HVNQSLIVTGHSLGGATAVLLGVMLKLWGFNVEQII--TFGCPRVGNKQFSDYYRSLSIPTIH--YVCGSDIVPATPPWLLGFRNLPGLRVVLPSKKMFRIISDH	-17.669,-2.454,-3.425,-17.446,-0.464,-0.400,-16.354,2.934,-1.178,-17.141,3.522,2.332,-13.517,3.121,3.366,-11.848,4.868,0.443,-12.215,8.373,1.855,-10.972,7.442,5.386,-8.120,5.457,3.767,-6.840,8.277,1.570,-7.051,10.717,4.512,-5.111,8.398,6.720,-2.577,7.880,3.914,-2.134,11.639,3.765,-1.950,12.093,7.585,0.726,9.367,8.097,2.694,11.079,5.337,2.364,14.649,6.762,3.028,13.575,10.401,6.172,11.665,9.579,4.8…	MNWEYTKPAIMASKEVYEDWLDVSIKPIEGTDKVLIACAGTEDIADWLTNFAFLFNRDMVHRGFSNNAFRIMPLVLNKVHVNQSLIVTGHSLGGATAVLLGVMLKLWGFNVEQIITFGCPRVGNKQFSDYYRSLSIPTIHYVCGSDIVPATPPWLLGFRNLPGLRVVLPSKKMFRIISDHKISSYLKHFYD
1DT3	MGYP000038258095	276	165	13	2	239	1	262	1	1.419e-12	377	269	297	VSQDLFNQ-------------FNLF--AQYSA--AAYCGKNNDAPA----------GTN---ITCTG---NACPEVEK--ADATFLYSFEDSGVGDVTGFLALDNTNKLIVLSFRGSRSIENWIGNLNFDLKEINDICSGCRGHDGFTSSW--RSVADTLRQKVEDAVREHPDYRVVFTGHSLGGALATVAGADLRGN-GYDIDVFSYGAPRVGNRAFAEFLTVQTGGTLYRITHTNDIVPRLPPREFGYSHSSPEYWIKSGTLVPVTRNDIVKIE	MSEEKTELIEKEITSISHHTMLDLLRVTYLVYDYGKNFKVKNKQDTIETFVSELQENHEFEKLKLSDSRKDILVEIAENVPTGKLYKFI-NNAVTDIQVGVAISEGKKRATVVFRGSESMADWYYDLMVFKHKL---HDNVCVHSGFYKQLTMNSVYDELVSTIKKILEEHNDFDVYITGHSLGGALSTLFGYMLSKEIENKVKVVSFASPRVGNYAWKKSFEEQKNLTHYRISNKRDIVTAFPI--YKYYHVGINIQL--------SNNKYKLCE	14.547,7.821,20.806,12.993,9.036,23.976,11.228,6.390,26.230,7.977,8.144,25.448,8.399,7.702,21.681,9.142,4.005,22.170,5.980,3.500,24.198,3.927,5.377,21.665,5.286,3.238,18.909,4.686,0.058,20.873,1.170,1.202,21.482,0.600,2.014,17.805,1.885,-1.401,16.817,-0.408,-3.015,19.169,-3.077,-1.336,17.144,-2.541,-3.514,14.151,-2.636,-7.262,14.653,-0.339,-9.739,12.847,-3.534,-11.382,11.573,-4.677,-8.064,10.000,…	MSEEKTELIEKEITSISHHTMLDLLRVTYLVYDYGKNFKVKNKQDTIETFVSELQENHEFEKLKLSDSRKDILVEIAENVPTGKLYKFINNAVTDIQVGVAISEGKKRATVVFRGSESMADWYYDLMVFKHKLHDNVCVHSGFYKQLTMNSVYDELVSTIKKILEEHNDFDVYITGHSLGGALSTLFGYMLSKEIENKVKVVSFASPRVGNYAWKKSFEEQKNLTHYRISNKRDIVTAFPIYKYYHVGINIQLSNNKYKLCEDSSNKKWYEETIFTCWNPYEHFCDLYYKRMNDNTW
1DT3	MGYP000041411492	307	161	23	2	234	8	284	1	0.0001911	112	269	320	VSQDLFN-QFNLFA--QYSAAAYCG-KNNDAPAGTNI-------------TCTGN----ACPEVE---------KAD--ATFLYSFEDSGVGD---------VTGFLALDNTNKLIVLSFRGSRSIENWIGNLNFDLKEINDI------CSGC-------RGHDGFTSSWRSVADTL---RQKVEDAVRE----HPDYRVVFTGHSLGGALATVAGADLRGNGYDID---VFSYGAPRV--------GNRAFAEFLTVQTGGTLYRITHTNDIVPRLPPREFGYSHSSP--EYWIKSGTLVPVTRND	ITADNYASEEFIISEIFYNQILYLPLDRLDLKDSASMQTVMEESKKLISELKTEEDQKALTKQVEYLEKMMEQNKDLKDVTISHMSWQDNDSDGKPDHPYGGMQAAVFTK--GEVVNVVFRGTPD-ESWIDN--------AEIEIGTSDYSKCYVDQYGNTYN--------YLSPMLIEGLEYVDKLLKENGDKWADKILTAGGHSKGDALAVLVTFVKKDTFDICFGINGPAF-SPEIREEIITNIGIEKFIEIQK-----KIRKLNESNDYVSPFGDISI----YAPENIRWC-TGFYNPKSILS	-34.184,-4.741,8.308,-31.010,-6.807,8.387,-28.657,-4.455,6.974,-27.444,-6.875,4.515,-24.658,-8.279,6.274,-22.380,-5.808,5.326,-21.032,-7.874,2.945,-18.555,-5.772,1.422,-19.353,-5.768,-2.179,-16.949,-4.994,-4.888,-18.699,-1.714,-5.087,-18.172,-0.885,-1.454,-14.561,-0.872,-1.944,-15.124,1.867,-4.310,-16.484,4.063,-1.633,-14.694,7.303,-0.857,-14.567,6.190,2.868,-12.586,3.010,2.003,-10.171,4.979,-0.2…	MLEESGLITADNYASEEFIISEIFYNQILYLPLDRLDLKDSASMQTVMEESKKLISELKTEEDQKALTKQVEYLEKMMEQNKDLKDVTISHMSWQDNDSDGKPDHPYGGMQAAVFTKGEVVNVVFRGTPDESWIDNAEIEIGTSDYSKCYVDQYGNTYNYLSPMLIEGLEYVDKLLKENGDKWADKILTAGGHSKGDALAVLVTFVKKDTFDICFGINGPAFSPEIREEIITNIGIEKFIEIQKKIRKLNESNDYVSPFGDISIYAPENIRWCTGFYNPKSILSAHYVGPLYNIETGKIAELTDGPGPVWLFIRSIYLKI
1DT3	MGYP000054760819	260	149	14	7	252	8	233	1	5.778e-11	322	269	250	FNQFNLFAQYSAAAYCGKNNDAPAGTNITCTGNACPEVEKA------DATFLYSFEDSGVGDVTGFLALDNTNKLIVLSFRGSRSIENWIGNLNFDL----KEINDICSGCRGHDGFTSSWRSVADTLRQKVEDAVREHPDYRVVFTGHSLGGALATVAGADLR-GNG-YDI-DVFSYGAPRVGNRAFAEFLTVQT-GGTLYRITHTNDIVPRLPPREFGYSHSSPEYWIKSGTLVPVTRNDIVKIEGIDATGGNNQPNI	NNAMWLI-TLMQLAYKK------------------KEVVEDVCTNVYDMEHVTVID-NDETDT--HCFITYNERIITITFRGTDSLKNWLTNLDFIPTDAAFPARYGTAGVTVHGGFNTALMSVWEEIQTIVNDAFEKHPDLRLFISGHSLGGALANLCYGHFTFGNEPRHVGAVYTIGQPCAGNAKFVKTLSEESPHTAYIRITNNQDVVPSVAP---GE-HCGVNIHFNSSG-------ELHFDPGLFR-GMINQIGS	-11.082,12.369,13.680,-9.638,14.699,11.451,-9.688,13.079,8.121,-9.949,9.685,9.604,-6.510,9.541,11.063,-6.351,7.119,14.015,-3.106,6.848,16.000,-3.653,3.182,16.972,-4.265,2.276,13.303,-1.231,4.317,12.242,1.086,2.621,14.775,-0.185,-0.840,13.956,0.083,-0.371,10.162,3.556,1.155,10.480,4.635,-1.951,12.376,3.199,-4.124,9.556,5.255,-2.032,7.085,8.391,-2.865,9.075,7.421,-6.543,9.211,7.157,-6.506,5.346,11.…	TKYGFNTNNAMWLITLMQLAYKKKEVVEDVCTNVYDMEHVTVIDNDETDTHCFITYNERIITITFRGTDSLKNWLTNLDFIPTDAAFPARYGTAGVTVHGGFNTALMSVWEEIQTIVNDAFEKHPDLRLFISGHSLGGALANLCYGHFTFGNEPRHVGAVYTIGQPCAGNAKFVKTLSEESPHTAYIRITNNQDVVPSVAPGEHCGVNIHFNSSGELHFDPGLFRGMINQIGSIHGSVTNLNHEIGRAHV
1DT3	MGYP000058903877	199	135	4	71	265	2	198	1	2.825e-13	466	269	200	NTNKLIVLSFRGSRSIENWIGNLNFDLKEINDICSGCRGHDGFTSSWRSVADTLRQKVEDAVREHPDYRVVFTGHSLGGALATVAGADLRG--NGYDIDVFSYGAPRVGNRAFAEFLTVQTGGTLYRITHTNDIVPRLPPREFGYSHSSPEYWIKSGTLVPVTRND--IVKIEGIDATGGNNQPNIPDIPAHLWYFGLI	PETNAIVVAYRGTSDVYNWATDLSIVRVAYP-YCDTCSVHSGFYKAEQEVIGDVFEQVGKLVSKYPDATIMVTGHSLGAALATLTAIDLQDKFQSSEVELYTYGCPRIFNQDGANFASA-AIGTHYRRTHYKDMVVHVPPMATGFVHTSGEVYEDGPISSYPNYPGGPMKSCSGEEDETCADQYNGMSVPDHLLYEGIP	-6.313,-4.008,20.250,-9.063,-4.034,22.870,-8.785,-0.380,23.675,-9.568,0.635,20.158,-11.813,-2.252,19.182,-9.520,-2.956,16.149,-8.135,-5.980,14.278,-4.615,-5.048,13.076,-2.960,-6.670,10.009,0.690,-5.525,9.758,3.057,-6.234,6.839,6.834,-5.998,6.976,8.970,-4.424,4.210,12.060,-5.924,2.644,15.318,-6.226,4.636,17.343,-5.032,1.589,15.475,-1.982,0.329,18.209,-0.847,-2.090,18.559,-4.105,-4.040,14.778,-4.63…	HPETNAIVVAYRGTSDVYNWATDLSIVRVAYPYCDTCSVHSGFYKAEQEVIGDVFEQVGKLVSKYPDATIMVTGHSLGAALATLTAIDLQDKFQSSEVELYTYGCPRIFNQDGANFASAAIGTHYRRTHYKDMVVHVPPMATGFVHTSGEVYEDGPISSYPNYPGGPMKSCSGEEDETCADQYNGMSVPDHLLYEGIPLG
1DT3	MGYP000060571736	241	160	11	2	228	22	236	1	4.073e-11	307	269	283	VSQDLFNQFNLFAQYSAAAY--CGKNNDAPAGTNITCTG-NACPEVEKADATFLYSFEDSGVGDVTGFLALDNTNKLIVLSFRGSRSIENWIGNLNFDLKEINDICSGCRGHDGFTSSWRSVADTLRQKVEDAVREHP----DYRVVFTGHSLGGALATVAG------ADLRGNGYDIDVFSYGAPRVGNRAFAE-FLTVQTGGTLYRITHTNDIVPRLPPREFGYSHSSPEYWIKSGTLV	FTLDEVKDLSKIVGLAWAPYKPAPADLVLPSRYFSYCSSENA--SII-----------EKG------AIMVDAVKKQIAISLPGTLNMPDFLVDMEASHKQLSWM--DGSAHAGFLNEFDNILPGLIPALEAISHDIGQDLKEFSVVTLGHSKGGAIAQILAAYLYTAVGFKN----MRVLTIASPLLFNKAAKIAYNNILDG-KTLHLIERADLIPYLPPGLFGFERTGYVLYVDCSNIV	-24.125,25.425,44.926,-24.110,22.168,43.282,-20.683,21.074,42.279,-20.799,19.167,39.082,-18.014,16.714,39.059,-16.363,16.585,35.736,-15.403,13.062,35.027,-12.385,13.147,32.879,-12.362,10.058,31.021,-8.878,9.603,30.151,-8.843,7.694,27.136,-5.705,5.917,27.259,-5.297,5.396,23.759,-2.969,2.667,23.663,-0.599,3.753,21.257,-0.442,0.698,19.487,3.050,0.223,18.350,3.387,-0.789,14.789,5.162,-3.748,16.105,1.…	MTVKSLICVIFLSTILNAQDAFTLDEVKDLSKIVGLAWAPYKPAPADLVLPSRYFSYCSSENASIIEKGAIMVDAVKKQIAISLPGTLNMPDFLVDMEASHKQLSWMDGSAHAGFLNEFDNILPGLIPALEAISHDIGQDLKEFSVVTLGHSKGGAIAQILAAYLYTAVGFKNMRVLTIASPLLFNKAAKIAYNNILDGKTLHLIERADLIPYLPPGLFGFERTGYVLYVDCSNIVHKLEGYEKSLDVMDSSQFKISKEKAFPSFNIFKFKSYLLMQYILSCL
1DT3	MGYP000063477997	234	135	18	45	265	26	202	0.986	0.03222	81	269	204	EKADATFLYSFEDSGVGDVTGFLALDNTNKLIVLSFRGSRS---IENWIGNLNFDLKEINDICSGCRGHDGFTSSWRSVADTLRQKVEDAVREHPDYRV-VFTGHSLGGALAT-VAGADLRGNG-YDIDVFSYGAPRVGN---RAFAEFLTV-QTGGTLYRITHTNDIVPRLPPREFGYSH-SSPEYWIKSGTLVPVTRNDIVKIEGIDATGGNNQPNIPDIPAHL--WYFGLI	LTV-LKVLAYTN-QPENGLVGYCFSDHIANAGIIAFRGTTGIGWVDNIKGGFLTD----------------------TPQQLKALEFFHVVEATFNFKQYTLTGQSKGGNNGQYITIVD--GAKVNRCV--TFNSQGFSAEFIRKYAPAINANQDKIIA--YESAWDVVNILLN------SIAGKR--IVVGGESKLPH--------------HNHP-----PNRLLDASGEIR	17.973,13.584,6.064,17.053,11.917,2.830,19.231,13.930,0.641,17.465,13.072,-2.308,15.210,15.077,-4.578,12.546,13.114,-3.150,12.868,14.234,0.193,10.274,16.268,1.753,11.449,19.423,3.256,11.001,19.852,7.024,8.236,22.366,6.184,6.394,19.816,3.949,6.608,17.261,6.734,5.309,19.650,9.245,2.468,20.552,6.919,1.611,16.889,6.413,1.651,16.316,10.173,-0.548,19.382,10.800,-3.064,18.053,8.224,-2.971,14.683,9.847,-…	ALQGDCAMSAAEWKKSLDLMAANPRLTVLKVLAYTNQPENGLVGYCFSDHIANAGIIAFRGTTGIGWVDNIKGGFLTDTPQQLKALEFFHVVEATFNFKQYTLTGQSKGGNNGQYITIVDGAKVNRCVTFNSQGFSAEFIRKYAPAINANQDKIIAYESAWDVVNILLNSIAGKRIVVGGESKLPHHNHPPNRLLDASGEIRKL
1DT3	MGYP000064495345	146	96	4	66	206	2	140	1	6.8e-06	197	269	164	FLALDNTNKLIVLSFRGSRSIENWIGNLNFDLKEINDICSGCRGHDGFTSSWRSVADTLRQKVEDAVREHPDYRVVFTGHSLGGALATVAG-----ADLRGNGYDIDVFSYGAPRVGNRAFAEFLTVQTGGTLYRITHTNDIVPRL	FCVVDHANKAVVLSIRGTFSMTGVMVDLVGFCDPFC----GGDAHSGMATMAIAVWSKSGPIIMETLSKFKDYEFVITGHSLGAGVACLLNILVHHENIIPHTNNVRCFAFAPPPVFHPISAVLEAVQ-HTIAYV--HERDIVPFL	6.033,-6.884,8.350,4.794,-7.153,12.001,1.398,-7.524,13.687,0.527,-5.959,17.008,-2.646,-5.692,19.175,-3.135,-2.087,20.372,-5.500,-2.583,23.416,-5.784,1.230,24.109,-7.183,2.007,20.574,-9.017,-1.378,20.092,-7.030,-2.267,16.955,-5.195,-5.133,15.317,-2.433,-3.328,13.475,-0.514,-4.826,10.524,2.559,-2.730,9.723,4.355,-3.362,6.397,7.943,-2.307,6.055,9.234,-0.399,2.969,12.485,-1.005,1.139,15.843,-0.077,2.…	HFCVVDHANKAVVLSIRGTFSMTGVMVDLVGFCDPFCGGDAHSGMATMAIAVWSKSGPIIMETLSKFKDYEFVITGHSLGAGVACLLNILVHHENIIPHTNNVRCFAFAPPPVFHPISAVLEAVQHTIAYVHERDIVPFLSVNGILRFFSLMNAIDMSCRHLYF
1DT3	MGYP000076527388	198	80	7	86	228	5	202	1	5.021e-10	324	269	203	IENWIGNLNFDLKEI-NDI----------CSGCRGHDGFTSSWRSVADTLRQKVEDAVREHPDYRVVFTGHSLGGALATVAGADLR-GNGYDIDVFSYGAPRVGNRAFAEFLT--------VQT----------------------------GGTLYRITHTNDIVPRLPPR----EFG---YSHSSPEYWIKSGTLV	AWEWMRDLQAGQEDVSSSLSSGLMMGDRRCEGCRVHRGFLAAFRNVRPLLNETLETCLRDWPTYRVVVTGHSYGGAVATLAGAYLRSVAGVEADVFTYGAPRAGNAVFAESMSAGMGSRRGSGSGGGSGSGSHRLRKGTKTRGAENGGEQAGGPVTVRVTNRQDIVTAQPPMYMWLPSGPVEYAHTTPEYWFEHGFGL	23.825,0.767,-1.303,21.743,3.624,-2.124,23.141,3.893,-5.472,21.288,0.882,-6.166,18.225,2.048,-4.990,18.175,4.478,-7.759,18.991,1.996,-10.273,16.409,-0.062,-8.918,13.948,2.519,-9.241,14.806,3.408,-12.574,14.381,-0.048,-13.452,11.001,-0.170,-11.871,9.051,1.005,-14.798,7.915,4.188,-13.273,4.651,3.937,-15.013,1.266,3.657,-13.387,-1.275,0.867,-14.046,-4.994,1.069,-13.284,-5.657,-1.187,-10.349,-9.204,-…	GTSRAWEWMRDLQAGQEDVSSSLSSGLMMGDRRCEGCRVHRGFLAAFRNVRPLLNETLETCLRDWPTYRVVVTGHSYGGAVATLAGAYLRSVAGVEADVFTYGAPRAGNAVFAESMSAGMGSRRGSGSGGGSGSGSHRLRKGTKTRGAENGGEQAGGPVTVRVTNRQDIVTAQPPMYMWLPSGPVEYAHTTPEYWFEHGFGLL
1DT3	MGYP000079417998	278	174	12	1	269	18	272	1	1.403e-15	531	269	279	EVSQDLFNQFNLFAQYSAAAYCGK-NNDAPAGTNITCTGNACPEVEKADATFLYSFEDSGVGDVTGFLALDNTNKLIVLSFRGSRSIENWIGNLNFDLKEI---NDICSGCRGHDGFTSSWRSVADTLRQKVEDAVREHPDYRVVFTGHSLGGALATVAGADLRGNGYDIDVFSYGAPRVGNRAFAEFLTVQTGGTLYRITHTNDIVPRLPPRE-FGYSHSSPEYWIKSGTLVPVTRNDIVKIE--GIDATGGNNQPN--IPDIPAHLWYFGLIGTCL	ASSLDL-TQLKTCVWLSGAAYCGKDNYQTM-----KVAGPAAG------FVYKDTLY-DHKTDLQGYTGVLPSSKSIYVVLRGSSSTMNWLDDFEVMMVAYTTYPEC--NCKVHYGFYRSALGVSNKAIESVRALQKQYPSYSVVVTGHSYGASCAQLIAMELEKNGIRCKLYDYGQPRVGDKKHASFVNTIIT-EYYRTTHNKDTVPHVPPTDVLGYYHSCREVFEDAAGV-------LTTCSSTNCEDPKCADQFSLAHTSTEDHLYYLGHRVACE	-40.649,45.582,-1.235,-38.240,42.912,-1.955,-36.942,41.179,1.116,-33.360,39.932,0.916,-32.962,37.032,3.031,-29.439,36.780,4.135,-28.741,33.289,4.948,-25.785,33.241,7.219,-23.829,30.168,6.404,-21.971,29.441,9.418,-19.138,27.369,8.185,-18.341,25.079,10.952,-14.755,24.685,10.414,-14.446,21.474,12.305,-10.927,20.885,13.262,-10.298,17.464,12.092,-7.890,16.316,14.711,-5.175,14.375,13.110,-5.894,10.831,…	MVFLNLFLFLSFLGFVSASSLDLTQLKTCVWLSGAAYCGKDNYQTMKVAGPAAGFVYKDTLYDHKTDLQGYTGVLPSSKSIYVVLRGSSSTMNWLDDFEVMMVAYTTYPECNCKVHYGFYRSALGVSNKAIESVRALQKQYPSYSVVVTGHSYGASCAQLIAMELEKNGIRCKLYDYGQPRVGDKKHASFVNTIITEYYRTTHNKDTVPHVPPTDVLGYYHSCREVFEDAAGVLTTCSSTNCEDPKCADQFSLAHTSTEDHLYYLGHRVACEESTTTSH
1DT3	MGYP000084052812	204	135	7	5	204	68	245	1	1.522e-09	301	269	392	DLFNQFNLFAQYSAAAYCGKNNDAP--AGTNITCTGNACPEVEKADATFLYSFEDSGVGDVTGFLALDNTNKLIVLSFRGSRSIENWIGNLNFDLKEINDICSGCRGHDGFTSSWRSVADTLRQKVEDAVREHPDYRVVFTGHSLGGALATVAGADLR--GNGYDIDVFSYGAPRVGNRAFAEFLTVQTGGTLYRITHTNDIVP	EELKYIHMCVHLSREIY-HTNRHFSEEAGKVVFDSGE-------------IIANDG----IPFTILNSDTFDSIFVVCRGSTSFSDWLIDFTASPADV----YGGLIHVGMYKAALSLYTQVKEFLLRISKENGDRKIVFTGHSLGGGVAAICNLIFKEEFPELVTKSYVFGAPAVFSRDLWEKSRS----FCTAFFLFGDPVP	8.327,-15.050,-27.622,7.922,-11.972,-25.719,11.175,-12.509,-24.111,12.915,-12.809,-27.334,11.231,-9.744,-28.660,12.275,-7.848,-25.845,15.719,-9.042,-25.812,16.017,-8.035,-29.386,14.618,-4.657,-28.851,16.985,-4.050,-26.107,19.898,-5.281,-27.996,19.091,-3.228,-30.958,18.646,-0.214,-28.951,21.707,-0.945,-27.148,23.384,-1.138,-30.466,22.074,2.125,-31.537,23.194,3.630,-28.465,26.503,2.060,-28.890,27.0…	EFRRVLFRSVTNQAKSLISTKKGMKIIAGTTAVVAAPQKICFAVFLDSFLETLPKMEEVDHAEIKDIEELKYIHMCVHLSREIYHTNRHFSEEAGKVVFDSGEIIANDGIPFTILNSDTFDSIFVVCRGSTSFSDWLIDFTASPADVYGGLIHVGMYKAALSLYTQVKEFLLRISKENGDRKIVFTGHSLGGGVAAICNLIFKEEFPELVTKSYVFGAPAVFSRDLWEKSRSFCTAFFLFGDPVPFLSFHNAASISSDKLPDIIAKKIESAYQKNVINSTNSFKFDMKINPFLLPPPPLETILDDEEGANRRTSALYPPGIQYIFNIDGKLFSKLELQVTKNCNYFGHFIKELDEKRHAIPNYSECVKELCKEANLIFNDESSEQEVTEIGR
1DT3	MGYP000087208247	230	140	14	37	250	26	231	1	1.667e-08	232	269	231	TGNACPEVEKADATFLYSFEDSGV---------GDVT--GFLALD---NTNKLIVLSFRG--SRSIENWIGNLNFDLKEINDICSGCRGHDGFTSSWRSVADTLRQKVEDAVREHPDYRVVFTGHSLGGALATVAGADLRGNGYDIDVFSYGAPRVGNRAFAEFLTVQTGGTLYRITHTNDIVPRLPPREFGYSHSSPEYWIKSGTLVPVTRNDIVKIEGIDATGGNNQP	NGAFHLDFRDN-FKITNS-QIQGVSGGLVNQLLNRSTGFALTAEGTSPQFKKHHIIGVRGTVFTSFADWLTNGNVAVTNG---PKNLEVHSGFQKAFSSMQATFNQ----YVIEHKPRCLHIVGHSLGGAIAELTAIWASERGIATNLYTFGAPRVVLENSIHQAAI--NIKHYRVTHGADPVPCVPV--WPFTHTV------SG--YQTAMNG-LSLIHI--SEPTRQE	-0.835,-3.007,17.999,2.264,-4.303,16.799,0.976,-7.555,16.732,-0.322,-7.148,13.411,2.708,-6.011,11.926,4.450,-8.945,12.816,1.696,-11.045,12.039,1.316,-9.638,8.873,4.779,-9.957,8.071,4.546,-13.451,8.388,1.277,-13.524,6.795,3.113,-12.137,4.157,6.175,-14.187,4.137,3.739,-16.670,3.388,1.483,-14.567,1.368,-0.328,-17.424,-0.192,2.356,-19.664,-0.751,0.406,-22.059,1.053,-1.369,-20.980,3.928,-2.541,-24.340…	DCLLSRGLGDVYKRQVYDIRKSTGFNGAFHLDFRDNFKITNSQIQGVSGGLVNQLLNRSTGFALTAEGTSPQFKKHHIIGVRGTVFTSFADWLTNGNVAVTNGPKNLEVHSGFQKAFSSMQATFNQYVIEHKPRCLHIVGHSLGGAIAELTAIWASERGIATNLYTFGAPRVVLENSIHQAAINIKHYRVTHGADPVPCVPVWPFTHTVSGYQTAMNGLSLIHISEPTRQE
1DT3	MGYP000090096963	231	130	11	15	223	4	217	1	5.549e-13	363	269	257	QYSAAAYCGKNNDAPAGTNITCTGNA---------------------CPEVEKADATFLYSFEDSGVGDVTGFLALDNTNKLIVLSFRGSRSIENWIGNLNFDLKEINDICSGCRGHDGFTSSWRSVADTLRQKVEDAVREHPDYRVVFTGHSLGGALATVAGADLRGNGYDIDVFSYGAPRVGNRAFAEFLTVQTGGTLYRITHTNDIVPRLPPREFG-YSHSSPEYWIK	FYEIDADEGKNI--PT-WRAAYSDRSALLMAKVSYHLYKYDFEQIAKIIKIGG--FKILKTYE---IGSVKGYLAKS--DDFAFLVFRGSVTLNDWKTNFNFELVDVESDIGNIKIHSGFWETYQKFADELKNDVDTLI--GDKIGLYTAGHSLGGALAQIASATLKLDNL-AACYTFGCPRVGNDKFDEF--VKC--PHYRIVNGWDLVPTIPWAMWGGYQQSGDARILT	-11.491,-16.392,-13.768,-13.993,-15.312,-11.366,-13.625,-16.946,-8.243,-10.453,-15.944,-6.916,-11.629,-12.724,-6.160,-14.503,-13.098,-4.013,-14.056,-12.235,-0.330,-15.683,-15.008,1.675,-17.558,-14.287,4.893,-14.973,-16.261,6.801,-11.864,-14.587,5.312,-12.109,-11.678,7.691,-12.498,-13.840,10.655,-9.510,-14.260,12.935,-7.408,-11.709,11.189,-5.124,-10.314,13.875,-6.176,-6.848,14.857,-3.047,-5.528,16…	MGEFYEIDADEGKNIPTWRAAYSDRSALLMAKVSYHLYKYDFEQIAKIIKIGGFKILKTYEIGSVKGYLAKSDDFAFLVFRGSVTLNDWKTNFNFELVDVESDIGNIKIHSGFWETYQKFADELKNDVDTLIGDKIGLYTAGHSLGGALAQIASATLKLDNLAACYTFGCPRVGNDKFDEFVKCPHYRIVNGWDLVPTIPWAMWGGYQQSGDARILTKLGNRPQRRTTSNIIEIARQIFGLVTFWLGSKNPLILDHQ
1DT3	MGYP000090444189	211	114	10	61	228	3	205	1	1.304e-08	255	269	209	GDVTGFLALDN-TNKLIVLSFRGSRSI--ENWIGNLNFDL---KEINDICSG---------------CRGHDGFTSSW-----RSVADTLRQKVEDAVREHP--------DYRVVFTGHSLGGALATVAG--------ADLRGNGYDIDVFSYGAPRVGNRAFAEFLTVQTGGTLYRITHTNDIVPRLPPREFGYSHSSPEYWIK-SGTLV	GSTEVLILTTTTSSNRILVIFRGTDDTLDGDWLTNITVPTVQYGPPDAILDGKVTARNVFGFQDESNIRVHRGFNSVFSNGLYESVSEVIGPLLLERNEQDGVGESSLVFGNEVYFGGHSLGGANAHVFGTYFAFFHPT------INTHITTLGSPRQGNYAYKVLGESLMNLRVWRLVNCRDVVPRAPL--FQYYHSGHLVWKRCDGPMN	-3.528,-10.804,-19.017,-3.318,-9.047,-15.877,-0.343,-10.654,-14.681,-1.144,-12.668,-11.683,-0.264,-10.744,-8.747,0.960,-13.371,-6.279,0.347,-12.900,-2.595,1.780,-14.895,0.274,-0.192,-14.832,3.563,1.545,-16.124,6.667,0.290,-16.344,10.289,2.159,-16.867,13.475,1.235,-19.736,15.738,2.428,-17.863,18.767,0.793,-15.575,21.246,1.269,-12.790,18.875,-1.578,-12.179,16.554,0.382,-11.305,13.542,-0.693,-11.745…	DTGSTEVLILTTTTSSNRILVIFRGTDDTLDGDWLTNITVPTVQYGPPDAILDGKVTARNVFGFQDESNIRVHRGFNSVFSNGLYESVSEVIGPLLLERNEQDGVGESSLVFGNEVYFGGHSLGGANAHVFGTYFAFFHPTINTHITTLGSPRQGNYAYKVLGESLMNLRVWRLVNCRDVVPRAPLFQYYHSGHLVWKRCDGPMNDKIE
1DT3	MGYP000094249537	164	97	9	63	207	14	166	1	9.571e-07	187	269	186	VTGFLALDNTNKLIVLSFRGSRSIENWIGNLNFDLKEINDICSG---CRGHDGFTSSWRSVADTLRQKVEDAVREHPD----YRVVFTGHSLGGALATVAG------ADLRGNGYD------IDVFSYGAPRVGNRAFAEFLTVQTGGTLYRITHTNDIVPRLP	VHWGLYTH--EDNLYLCFRGTVTKADWATNCSTPVMEV---KTANGDYSIHVGF---WAAT-QSAFPAIMDQLKIHSGAGKPRKLVVTGHSLGGALAQIFALTYYHNLHSHVTRDEQIHPELVNVVTFAAPEVFVDCPATYDFVRSVSLNY--ACEHDVIPCLP	-2.964,-16.400,20.709,-1.572,-14.437,17.987,-2.945,-15.520,14.768,-0.919,-15.150,11.623,-1.635,-15.570,8.023,1.086,-15.505,5.463,0.830,-15.374,1.813,4.284,-16.420,0.589,3.501,-18.252,-2.450,6.223,-18.068,-4.966,3.538,-17.606,-7.628,2.266,-14.571,-6.096,3.556,-11.182,-6.942,2.672,-9.777,-3.571,3.771,-11.211,-0.254,1.811,-10.108,2.774,1.153,-11.162,6.407,-1.905,-10.499,8.623,-1.285,-10.558,12.387,-…	EDAAEINSSPRDLVHWGLYTHEDNLYLCFRGTVTKADWATNCSTPVMEVKTANGDYSIHVGFWAATQSAFPAIMDQLKIHSGAGKPRKLVVTGHSLGGALAQIFALTYYHNLHSHVTRDEQIHPELVNVVTFAAPEVFVDCPATYDFVRSVSLNYACEHDVIPCLPSLLACNSGVAMLQAELEKIT
1DT3	MGYP000097281883	213	119	6	53	236	9	220	1	9.963e-14	437	269	324	YSFEDSGV-GDVTGFLALD--NTNKLIVLSFRGSRSIENWIGNLNFDLK----------EINDICSGCRGHDGFTSSWRSVADTLRQKVEDAVREHPDYRVVFTGHSLGGALATVAGADLRGNGYDIDVFSYGAPRVGNRAFAEF------LTVQTGGT----------LYRITHTNDIVPRLPPREFGYSHSSPEYWIKSGTLVPVTRNDIV	QTWNTGPLLSDSCGYIALSHPPSAKRIIVSFRGTYSIVNAIADLSVAPQVYMPYPNGKDHPYAKCDNCTAHGGFMRSWENTRPEIIPDLIEAMMKYPDYQLVVTGHSLGGAVAALGSLEFKLRGWNPHVTTFGEPRIGNQALADYFDKVFGLNSTAPSNAGLGYDLHLPYRRVTHTNDPVPLLPPPSLDYRMHSGEIFI-TKVDVPPAITDMR	2.294,-9.508,22.309,1.763,-12.833,23.619,1.988,-14.928,20.739,-0.416,-17.281,22.165,-3.078,-14.937,21.162,-2.425,-15.169,17.608,-3.760,-17.536,15.076,-1.873,-17.317,11.831,-2.764,-18.555,8.402,-0.204,-18.187,5.653,-0.617,-17.923,1.886,1.662,-18.099,-1.181,0.563,-17.765,-4.712,3.601,-19.334,-6.131,7.063,-18.672,-7.410,6.460,-16.228,-9.987,7.032,-12.512,-10.109,3.531,-11.882,-9.592,3.489,-13.675,-6…	MNHSDLTVQTWNTGPLLSDSCGYIALSHPPSAKRIIVSFRGTYSIVNAIADLSVAPQVYMPYPNGKDHPYAKCDNCTAHGGFMRSWENTRPEIIPDLIEAMMKYPDYQLVVTGHSLGGAVAALGSLEFKLRGWNPHVTTFGEPRIGNQALADYFDKVFGLNSTAPSNAGLGYDLHLPYRRVTHTNDPVPLLPPPSLDYRMHSGEIFITKVDVPPAITDMRVCYGPTDPTCISEEEQEYVRKLQDALPWMPSDMPNDDQSPLYPENADSEVDTEMVKPWELFFAHRDYFHRVGVCFPNIFGSPDKSDKKSPWWKFKWLFPDHDNL
1DT3	MGYP000110754555	262	173	13	2	236	1	243	1	1.247e-08	239	269	282	VSQ-DLFNQFNLFAQYSAAAYCGKNNDAPAGTNITCTGNACPEVEKAD----ATFLYSFEDSGVGDVTGFLALDNTNKLIVLSFRGSRS--------------IENWIGNLNFDLKEINDICSGCRGHDGFTSSWRSVADTLRQKVEDAVREHP-DYRVVFTGHSLGGALATVAGADLRGNG--YDIDVFSYGAPRVGNRAFAEFLTVQTGGTLYRITHTNDIVPRLP-----PREFGYSHSSPEYWIKSGTLVPVTRNDIV	MGQYEMEHQFDVSLAKICCKLCSYGYDR----MVGQRED--KSLTSSLGVTRESLYH------TGTL--AAMLCDRADHRVLVLPGTESQWEFVRTPGKTLESLKDWAKNVQFRLTSGTTLRVPGRVHEGFCSEVLHLMPSIEMLIQEHSDLDGKELPLVITGHSQGGAEAAIAAGTLCDHRAIEQVI--TFAAPRPGDHVFSAWMA-NQDFPIWRCEYGYDIVPHMPRSLVTVPSYDFDGVGMLVY--GEPNNATSIVQIG	14.514,-5.241,17.286,11.678,-4.370,19.441,9.821,-7.015,21.417,6.999,-6.219,19.064,8.182,-8.022,16.172,7.524,-11.260,17.679,4.001,-10.844,18.147,2.768,-10.310,14.672,2.670,-13.146,12.160,2.543,-12.393,8.396,-1.057,-13.342,7.288,-0.428,-14.746,3.753,-4.228,-15.125,3.215,-4.797,-11.379,3.944,-1.731,-10.477,1.827,-3.253,-12.406,-1.154,-6.542,-10.472,-0.651,-4.643,-7.132,-0.481,-2.677,-8.026,-3.660,-5…	MGQYEMEHQFDVSLAKICCKLCSYGYDRMVGQREDKSLTSSLGVTRESLYHTGTLAAMLCDRADHRVLVLPGTESQWEFVRTPGKTLESLKDWAKNVQFRLTSGTTLRVPGRVHEGFCSEVLHLMPSIEMLIQEHSDLDGKELPLVITGHSQGGAEAAIAAGTLCDHRAIEQVITFAAPRPGDHVFSAWMANQDFPIWRCEYGYDIVPHMPRSLVTVPSYDFDGVGMLVYGEPNNATSIVQIGRGAMAVRRASRLAANTEYWVEHHHLTHYLEMLEAFPCDA
1DT3	MGYP000116282874	136	85	7	53	168	6	131	0.254	0.5524	42	269	272	YSFEDSGVGDVTGFLALD--NTNKLIVLSFRGSRSI----ENWIGNLNFDLKEINDI--------CSGC------RGHDGFTSSWRSVADTLRQKVEDAVREHPDYRVVFTGHSLGGALATVAGADLRGNGYDIDV	VSLSIKAFDEINLYYKKDLIDNPKAVIL---ISHGLAEHCQRYDYVTNK----LNNLGYNVYRYDHRGHGLSDGKRGHLSDVNNLVNDANTIL---ELIKSENPNSPIFLLGQDVGGHTFLEYGCQYKDSVQGIIL	-19.484,-18.843,2.552,-17.261,-16.855,0.455,-19.415,-14.685,-1.751,-16.564,-15.066,-4.104,-14.005,-12.877,-5.778,-15.272,-9.965,-7.902,-13.104,-8.028,-10.355,-14.322,-4.567,-11.161,-13.392,-1.081,-12.341,-14.298,2.391,-11.008,-13.695,5.827,-12.482,-11.320,8.016,-10.474,-11.747,11.813,-10.071,-10.101,12.388,-13.512,-12.023,9.630,-15.374,-9.120,7.159,-15.144,-10.430,3.501,-14.783,-9.061,1.966,-11.6…	MSLGMVSLSIKAFDEINLYYKKDLIDNPKAVILISHGLAEHCQRYDYVTNKLNNLGYNVYRYDHRGHGLSDGKRGHLSDVNNLVNDANTILELIKSENPNSPIFLLGQDVGGHTFLEYGCQYKDSVQGIILCSPLVCDTLGLTKTDESLTDILTPIPYNNTHNLTHDTVMQNSYENDPLILNKITLGMYKSLRESCLNIIDDLYKFKYPCLILHGSSDSTVSHNDSKFLFDNILSRDKDIRILNGLYHRLLDEIVKDEIIEEISKWIEKRLS
1DT3	MGYP000120145203	274	176	11	1	268	28	278	1	7.127e-17	577	269	284	EVSQDLFNQFNLFAQYSAAAYCGKNNDAPAGTNITCTGNACPEVEKADATFLYSFEDSGVGDVTGFLALDNTNKLIVLSFRGSRSIENWIGNLNFDLKEINDICS-GCRGHDGFTSSWRSVADTLRQKVEDAVREHPDYRVVFTGHSLGGALATVAGADLRGNGYDIDVFSYGAPRVGNRAFAEFLTVQTGGTLYRITHTNDIVPRLPPR-EFGYSHSSPEYWIKSGTLVPVTRND-IVK-IEGIDATGGNNQPN--IPDIPAHLWYFGLIGTC	SSFNK--AQATTSLWLSAAAYCGKSSYMTH-QFKGPTAG---------FKLTYV-ISDSSTDTQGFIGYLPSDNSIYVTYRGSSSIRNWISDLDAFKTAYTSFPDCNCQVHKGFYAAEQKVIGGVLTEVKRLRGVYPTAALKVTGHSLGAALAQLTSMDLLKAGLSCSVYNFGQPRVGDQAYAKFAT--GKVDTWRVTHNKDMVPHVPVTTGMDFYHMCREEFEDV--------NHALKTCDSSCEDPTCADQYSLAHTNVDDHLVYLGMSVSC	-52.910,34.155,27.871,-49.455,34.137,26.787,-47.614,30.856,27.046,-43.872,31.324,27.441,-42.163,28.832,25.451,-39.040,27.915,27.240,-36.288,27.105,24.863,-34.116,24.543,26.503,-30.655,25.104,25.289,-28.972,21.923,25.557,-25.375,22.813,25.596,-23.757,20.059,23.968,-20.299,20.323,25.192,-18.326,18.987,22.480,-15.532,17.425,24.252,-12.816,17.938,21.890,-11.071,14.932,22.626,-7.737,15.936,21.622,-6.4…	MWSLALVLVVAVAMVAVTFAADFNESSSSFNKAQATTSLWLSAAAYCGKSSYMTHQFKGPTAGFKLTYVISDSSTDTQGFIGYLPSDNSIYVTYRGSSSIRNWISDLDAFKTAYTSFPDCNCQVHKGFYAAEQKVIGGVLTEVKRLRGVYPTAALKVTGHSLGAALAQLTSMDLLKAGLSCSVYNFGQPRVGDQAYAKFATGKVDTWRVTHNKDMVPHVPVTTGMDFYHMCREEFEDVNHALKTCDSSCEDPTCADQYSLAHTNVDDHLVYLGMSVSCDAVSFA
1DT3	MGYP000121019014	282	176	13	1	269	47	305	1	1.125e-13	451	269	315	EVSQDLFNQFNLFAQYSAAAYCGKNNDAPAGTNITCTGNACPEVEKADATFLYSFEDSGVGDVTGFLALDNTNKLIVLSFRGSR--SIENWIGNLNFDLKEI-----NDICSGCRGHDGFTSSWRSVADTLRQKVEDAVREHPDYRVVFTGHSLGGALATVAGADL---RGNGYDIDVFSYGAPRVGNRAFAEFLTVQTGGTLYRITHTNDIVPRLPPREFGYSHSSPEYWIKSGTLVPVTRNDIVKI-EGIDATGGNNQPNIPDIPAHLWY--FGLIGTCL	KDVPDPVPMYQQFAALAQQSNC---HNYH--INIS-VGD---------ATLLYSWGDNDRN-QRLQLFHSKS-LGIVASWAGMNPTSINSILGAADVFLVDVDRRYFPHAEKGAKLYKGFQDAYKRVAPTFIKELQYYQELYNEDRVSLTGLSYGAALANIALLHVKKNLKRGSIYRTVAFGLPRVGNQEWANSIDKHADGKFFYVANGNDLVVRAPPRELGYQHPSGQIWIN-----PSNSSKW-KFYPGQENVYGANSEFGYSIPDHTGVYFRTEIASLW	-6.709,-35.259,-32.906,-6.534,-31.976,-31.214,-3.919,-29.590,-32.366,-2.178,-27.498,-29.689,-1.669,-24.150,-30.936,1.258,-22.807,-29.170,1.114,-19.262,-29.702,4.531,-17.964,-29.329,4.284,-14.665,-27.932,7.284,-13.144,-29.144,8.340,-10.659,-26.690,8.655,-7.890,-28.791,11.154,-5.964,-26.995,10.458,-3.048,-28.785,13.507,-1.321,-28.443,11.862,1.776,-28.871,14.771,3.403,-30.029,13.013,6.455,-29.647,15…	MACFRVILYLSVIFFVQCVFAAPKGIAKVAPENHNFFGRITSYAHPKDVPDPVPMYQQFAALAQQSNCHNYHINISVGDATLLYSWGDNDRNQRLQLFHSKSLGIVASWAGMNPTSINSILGAADVFLVDVDRRYFPHAEKGAKLYKGFQDAYKRVAPTFIKELQYYQELYNEDRVSLTGLSYGAALANIALLHVKKNLKRGSIYRTVAFGLPRVGNQEWANSIDKHADGKFFYVANGNDLVVRAPPRELGYQHPSGQIWINPSNSSKWKFYPGQENVYGANSEFGYSIPDHTGVYFRTEIASLWGHCPATVGKD
1DT3	MGYP000125461038	269	167	17	1	239	96	341	1	2.555e-06	180	269	344	EVSQDLFNQFNLFAQYSAAAYCG---KNNDAPAGTNITCTGNACPEVEKAD--ATFLYSFEDSGVGDVTGFLALD---NTNKLIVLSFRGSRS----IENWIGNLNFDLKEINDICSGCRGHDGFTSSWRSVADTLRQKVEDAVREHPDYRVVFTGHSLGGALATVAGADLRGNGYDIDVFSYGAPRVGNRAFAE-F--LTVQTGGTLYRITHTNDIVPRLPPREFGYSHSSPEYWIK--------SGTLVPVTRND-------IVKIE	DMSAAAFASQYADEYLAKLAYKDPTVDPNDAK--SAVPGYTAADKKFLA-DWGYKFSTDVRDA-KTGLYVAKFDPVDPKSGVAPVVAFRGSEGGSPDAREVIKDAQAD---LGYS-------YVGQNQYEAKKSEIAKLFQDP----NGQKVDVTGHSLGGALAQKAVADNIARTH--ALTTFQAPGI-LQADADKFAKENQKYGVDVNHHYVTTDLVHRAGEAKLGGNF--WEHTLPGVKGPDQLGGLQLPHSIDDIKRDLALGKSIG	32.432,41.755,-12.991,30.878,38.714,-11.159,33.353,35.894,-10.468,32.658,32.426,-11.970,32.929,29.947,-9.195,34.131,26.688,-10.674,32.879,23.808,-8.696,35.470,21.137,-9.186,33.968,17.754,-9.294,36.564,15.558,-7.901,34.707,12.324,-7.934,36.651,9.737,-6.205,35.506,6.537,-7.515,35.220,4.424,-4.537,35.978,0.938,-5.639,33.649,-1.061,-3.598,35.343,-4.329,-3.407,32.724,-6.859,-2.915,34.316,-9.537,-0.992…	MTPRMSIGSSGARMKISVRENPIASPVVDDPLPPDCAMIAALPYSEVNCANASPVMSQPAAAQVKDGIKELDKKDRPPPSREELMKNPELYGKPRDMSAAAFASQYADEYLAKLAYKDPTVDPNDAKSAVPGYTAADKKFLADWGYKFSTDVRDAKTGLYVAKFDPVDPKSGVAPVVAFRGSEGGSPDAREVIKDAQADLGYSYVGQNQYEAKKSEIAKLFQDPNGQKVDVTGHSLGGALAQKAVADNIARTHALTTFQAPGILQADADKFAKENQKYGVDVNHHYVTTDLVHRAGEAKLGGNFWEHTLPGVKGPDQLGGLQLPHSIDDIKRDLALGKSIGAGI
1DT3	MGYP000125511228	193	131	7	47	227	3	188	1	1.889e-10	336	269	217	ADATFLYSFEDSGVG--DVTGFLALDNT-NKLIVLSFRGSRSIENWIGNLNFDLKEINDICSG-----CRGHDGFTSSWRSVADTLRQKVEDAVREHPD-YRVVFTGHSLGGALATVAGADLRGNGYDI-DVFSYGAPRVGNRAFAEFLTVQTGGTLYRITHTNDIVPRLPPREFGYSHSSPEYWI--KSGTL	HASRIEATLTTEAFGVGQLRADILTDIEDQDLLIIAIRGSANNGNWLANIDARKVNSTILISTDGSDQAQVHAGFARASETITPAIQEA-------IPAGKRVIITGHSLGAAIALFVAPRLVQAGITVDRVVTFGCPRVGDANYLTDWTDLVGPVAHRYVNGPDPVCQLPTPLRGFRHIGKLHWHSYQGDAL	-11.417,19.965,10.550,-8.429,17.772,10.716,-9.379,14.571,12.025,-7.801,14.171,15.381,-6.116,10.914,16.014,-4.067,9.327,18.769,-1.145,7.136,18.151,-1.773,3.776,19.705,1.286,1.979,18.517,4.448,2.385,16.461,5.553,-0.752,14.814,9.074,-1.199,13.430,10.558,-4.099,11.474,13.657,-4.800,9.411,13.002,-5.765,5.832,15.652,-7.131,3.601,16.777,-4.654,0.995,14.487,-1.952,2.306,15.857,-1.424,5.814,13.607,-0.317,…	HPHASRIEATLTTEAFGVGQLRADILTDIEDQDLLIIAIRGSANNGNWLANIDARKVNSTILISTDGSDQAQVHAGFARASETITPAIQEAIPAGKRVIITGHSLGAAIALFVAPRLVQAGITVDRVVTFGCPRVGDANYLTDWTDLVGPVAHRYVNGPDPVCQLPTPLRGFRHIGKLHWHSYQGDALQAGAWMRFGNRLGAYWHAWRNPGADLIGY
1DT3	MGYP000126434559	259	161	12	1	225	2	250	1	7.767e-12	313	269	288	EVSQDLFNQFNLFAQYSAAAYCGK--------NNDAPAGTNITCTGNACPEVEKA--DATFLYSFEDSGVGDVTGFLALDNTNKLIVLSFRGSRSIENWIGN-------LNFD----LKEINDICSGCRGHDGFTSSWRSVADTLRQKVEDAVRE--HPDYRVVFTGHSLGGALATVAG---------ADLRGNGYDIDVFSYGAPRVGNRAFAEFLTVQTGGTLYRITHTNDIVPRLPPREFG-YSHSSPEY-WIKSG	SLNNVVKDIFWDCALTSELAFNSIDELVGLWNNRNTSNEIKVEFKEASRELFQKLVQKPQFINVDDDESDELVRVCILEF--KDKYIVGFRGTETKLDLKSDIDIRKVPITYNNKTLVYKRRNREHKLKMHCGFYRQYLRIKEYL-----DVILESFDKSKKVIFTGFSLGGALATIASFYYRLKYPISVL-GDYTPMWCVTYGSPRVGNKWFSKFYNVSVDAHIYRIILYGDSITRMP--SFSRFKHIGTKIVLCKSG	5.029,14.656,18.726,2.859,12.011,20.173,0.545,10.175,17.842,-3.066,10.659,18.738,-4.764,7.387,19.682,-6.675,7.273,16.391,-3.445,7.232,14.379,-2.124,4.557,16.686,-5.140,2.333,16.237,-4.957,2.776,12.423,-1.276,1.816,12.410,-2.023,-1.282,14.530,-5.053,-2.415,12.427,-2.945,-1.884,9.266,-0.033,-3.976,10.630,-2.392,-6.873,11.552,-4.174,-6.603,8.156,-0.780,-6.729,6.433,-0.005,-9.917,8.418,-3.439,-11.459…	MSLNNVVKDIFWDCALTSELAFNSIDELVGLWNNRNTSNEIKVEFKEASRELFQKLVQKPQFINVDDDESDELVRVCILEFKDKYIVGFRGTETKLDLKSDIDIRKVPITYNNKTLVYKRRNREHKLKMHCGFYRQYLRIKEYLDVILESFDKSKKVIFTGFSLGGALATIASFYYRLKYPISVLGDYTPMWCVTYGSPRVGNKWFSKFYNVSVDAHIYRIILYGDSITRMPSFSRFKHIGTKIVLCKSGIKFKHSERHTIFKRLCICQNPFKFHSLHLYIKRLDKLL
1DT3	MGYP000131119961	227	130	10	1	207	15	219	1	2.353e-09	278	269	222	EVSQDLFNQFNLFAQYSAAAYCGKNNDAPAGTNITCTGN-------ACPEVEKADATFLYSFEDSGV----GDVTGFLALD---NTNK-LIVLSFRGSRS--IENWIGNLNFDLKEINDICSGCRGHDGFTSSWRSVADTLRQKVEDAVREHPDYRVVFTGHSLGGALATVAGADLR---GNGYDIDVFSYGAPRVGNRAFAEFLTVQTGGTLYRITHTNDIVPRLP	AYSQEL---AHLSVNFASAAYC---------------ANLQALKAWNCAPCSNSNA---FVNVSAVVIDSVNDINAYVGVFNDPTTNQETVLVSFRGTEPTDYENWVTDLDAFKTYPYSGYPSVGVHKGFYNAWLNFKPKIYQYIKSTAAGSSASKALIVGHSLGGALATMCAMDLFLDGDFGLSVGIFTFGSPRVGDLAFSELFDKGPGPLSYRVVHYRD-LGKIK	10.142,-35.933,-1.908,7.342,-34.071,-0.170,4.783,-32.984,-2.532,2.679,-30.980,-0.420,-0.790,-31.326,-1.509,-1.998,-27.975,-1.857,-5.602,-28.586,-1.596,-7.431,-26.064,-3.435,-9.235,-24.297,-0.848,-12.163,-22.816,-2.392,-11.504,-19.338,-3.299,-13.851,-17.417,-1.206,-14.352,-14.621,-3.444,-14.876,-11.911,-1.108,-17.308,-9.668,-2.640,-16.194,-6.150,-3.284,-17.187,-4.007,-0.296,-18.083,-0.410,-1.190,-…	MCRNALESLPLLVTAYSQELAHLSVNFASAAYCANLQALKAWNCAPCSNSNAFVNVSAVVIDSVNDINAYVGVFNDPTTNQETVLVSFRGTEPTDYENWVTDLDAFKTYPYSGYPSVGVHKGFYNAWLNFKPKIYQYIKSTAAGSSASKALIVGHSLGGALATMCAMDLFLDGDFGLSVGIFTFGSPRVGDLAFSELFDKGPGPLSYRVVHYRDLGKIKHSA
1DT3	MGYP000132338904	304	183	18	6	262	35	308	1	1.476e-07	223	269	316	LFNQFNLFAQYSAAAYCGKNNDAPAGTNITCTGNACPEVEK-----ADATFLYSFEDSGV-GDVTGFLA----------LDNTNK----------LIVLSFRGSR-SIENWIG--NLNFDLKEINDICSG--CRGHDGFTSSWRSVADTLRQKVEDAVREHPDYRV-VFTGHSLGGALATVAGADLRGN------GYDIDVFSYGAPRVGNRAFAEFLTVQTGGTLYRITHTN---DIVPRLPPREFGYSHSSPEYWIKSGTLVPVTRNDIVKIEGIDATGGNNQPNIPD------IPAHLWYF	FCTMSKNAAQVSRTAY----NSS-------------ASDKRKYLPSG-FTYRKSWSSSTYKGGDHAYMSESYIYIQQVSKDPTNKTAKPTFVKKKACHYTFRGLNLSNTEMLDEVKVMKKKVNCSSYNKRGMGSCSKAPYRRYLTLRNNIIAHIKVYIAK-GRCDFLVLNGHSMGGAMAVLLAADLYLYNKSVYHNKFVKVYTFGSPKTFEKSSASNWSSKLSITRWAYDDSKGLGDHVPRMPSS--SFAHLGRAYKIYRKFR--------LFKKS-QYSYNKQSDQWTPSPKLFGTHAANYYT	-25.736,-38.155,44.135,-22.342,-36.752,43.849,-21.350,-38.340,40.652,-24.145,-36.897,38.641,-23.168,-33.380,39.582,-19.666,-33.738,38.291,-20.812,-34.793,34.829,-23.031,-31.807,34.348,-20.311,-29.342,35.252,-17.971,-30.925,32.840,-20.469,-30.708,29.988,-21.106,-26.996,30.563,-17.381,-26.214,30.582,-16.782,-28.124,27.402,-19.720,-26.414,25.668,-18.403,-23.002,26.688,-14.952,-23.899,25.465,-16.330,…	MSALRHTQTFCKALSAFVIGTCALLQAQHAKAGAFCTMSKNAAQVSRTAYNSSASDKRKYLPSGFTYRKSWSSSTYKGGDHAYMSESYIYIQQVSKDPTNKTAKPTFVKKKACHYTFRGLNLSNTEMLDEVKVMKKKVNCSSYNKRGMGSCSKAPYRRYLTLRNNIIAHIKVYIAKGRCDFLVLNGHSMGGAMAVLLAADLYLYNKSVYHNKFVKVYTFGSPKTFEKSSASNWSSKLSITRWAYDDSKGLGDHVPRMPSSSFAHLGRAYKIYRKFRLFKKSQYSYNKQSDQWTPSPKLFGTHAANYYTDALNKGCK
1DT3	MGYP000137837641	195	122	5	71	264	2	186	1	2.079e-13	483	269	195	NTNKLIVLSFRGSRSIENWIGNLNFDLKEINDICSGCRGHDGFTSSWRSVADTLRQKVEDAVREHPDYRVVFTGHSLGGALATVAGADLRG-NGYDIDVFSYGAPRVGNRAFAEFLTVQTGGTLYRITHTNDIVPRLPPREFGYSHSSPEYWIKSGTLVPVTRNDIVKIEGIDATGGNNQPNIPDIPAHLWYFGL	EDQQSIYVVFRESTSTRDWINNIDTILTPYPN-CPKCEVHAGFYRAEQSVQQAVVAEVQALRLQNPNFKVIVTGHSLGGALSTLAALTLSSSLNTSITLINFGSPRVGNLEFAEFASSTIQ-NRFRLTHYRDVVPHLPWTE-RFVHISGEWYEDQ-------YGKLHSCEGYEDEDCADQWYYLTTEDHLYYLGL	-4.034,-5.480,19.942,-6.630,-5.654,22.585,-5.841,-2.325,24.078,-6.577,-0.587,20.908,-9.496,-2.669,19.838,-7.799,-3.245,16.456,-6.977,-6.108,14.060,-3.679,-5.400,12.252,-3.023,-6.984,8.865,0.719,-6.472,8.154,2.280,-7.178,4.771,6.009,-7.775,4.611,8.435,-5.916,2.218,10.808,-7.530,-0.293,13.816,-9.465,1.131,15.978,-7.292,-1.148,14.663,-3.870,-1.934,17.469,-3.227,-4.480,16.880,-6.414,-6.454,13.163,-5.…	MEDQQSIYVVFRESTSTRDWINNIDTILTPYPNCPKCEVHAGFYRAEQSVQQAVVAEVQALRLQNPNFKVIVTGHSLGGALSTLAALTLSSSLNTSITLINFGSPRVGNLEFAEFASSTIQNRFRLTHYRDVVPHLPWTERFVHISGEWYEDQYGKLHSCEGYEDEDCADQWYYLTTEDHLYYLGLNITNCAAVT
1DT3	MGYP000138456398	211	132	7	49	254	7	207	1	7.44e-15	490	269	208	ATFLYSFEDSGVGDVTGFLALDNTNKLIVLSFRGSRSIENWIGNLNFDLKEINDIC--SGCRGHDGFTSSWRSVADTLRQKVEDAVREHPDYRVVFTGHSLGGALATVAGADLR--GNGYDIDVFSYGAPRVGNRAFAEFLTVQTGGTLYRITHTNDIVPRLPPREFGYSHSSPEYWIKSGTLVPVTRNDIVK-IEGIDATGGNNQPNIPD	FVLTGYWTDP-VTKTESFSGYHAESKAIILAHEGSHNTENWITNLKFKKADLVDYPNATGAKVHRGFQEAWEGAGQEVSDHVADLVERFPEYRVYATGHSLGGALAVLSSLYVTVKKPHVPVHVYTFGAPRVGNDAFQLYFQSQIEN-AVRVVHSTDIVPHLPFRFLGYHHAPLEVW--EHNGG------YKVCNGSGEDPKCSDSVVVPT	12.223,-0.771,17.549,9.801,1.217,19.345,8.064,0.147,22.318,6.080,-2.570,20.982,4.617,-2.891,24.262,1.064,-3.982,23.787,1.228,-5.004,20.237,0.203,-8.660,19.711,1.489,-10.373,16.594,-1.235,-12.762,15.368,0.006,-13.742,11.891,3.118,-14.011,9.717,3.389,-14.899,6.056,6.179,-15.196,3.467,5.592,-15.342,-0.250,7.550,-18.483,-1.519,8.496,-16.781,-4.865,9.317,-13.238,-3.880,10.336,-13.843,-0.174,8.192,-10.…	MGNTTGFVLTGYWTDPVTKTESFSGYHAESKAIILAHEGSHNTENWITNLKFKKADLVDYPNATGAKVHRGFQEAWEGAGQEVSDHVADLVERFPEYRVYATGHSLGGALAVLSSLYVTVKKPHVPVHVYTFGAPRVGNDAFQLYFQSQIENAVRVVHSTDIVPHLPFRFLGYHHAPLEVWEHNGGYKVCNGSGEDPKCSDSVVVPTA
1DT3	MGYP000141479521	157	113	7	1	139	33	178	1	0.003486	102	269	181	EVSQDLFNQFNLFAQYS--------AAAYCGKNN---DAPAGTNITCTGNACPEVEKADATFLYSFEDSGVGDVTGFLALDNTNKLIVLSFRGSRSIENWIGNLNFDLK--EIND---ICSGCRGHDGFTSSWRS--VADTLRQKVEDAVREHPDYR	FPSLNDTFEMATLSVLMYHFHRDNDDTEVCDNINRQNYTIGSLPPE----------ND-IVCHYYYHQRNESGTQVMIASSVEHSYLAVVWAGTDDLRTSLTDADMVTAPFGNENFSLPDPQIRVHAGFNSYVFAHGLFEDIVRRLETEHRRRPNLR	-7.802,9.033,-5.366,-7.186,5.700,-6.569,-9.065,3.607,-4.010,-10.148,0.908,-6.296,-8.156,-2.082,-5.929,-9.692,-3.763,-3.041,-10.499,-6.729,-4.578,-8.146,-8.685,-6.247,-5.670,-9.652,-3.958,-8.033,-12.003,-2.536,-7.387,-14.533,-4.825,-3.992,-14.587,-5.479,-2.859,-18.034,-5.589,0.338,-17.233,-4.428,1.570,-20.619,-4.588,1.394,-20.734,-0.943,-1.411,-18.923,0.015,-3.544,-21.383,1.508,-6.420,-21.501,-0.6…	FGVALLSPLGQCCIKGFPSKYIRSSHVRLDNDFPSLNDTFEMATLSVLMYHFHRDNDDTEVCDNINRQNYTIGSLPPENDIVCHYYYHQRNESGTQVMIASSVEHSYLAVVWAGTDDLRTSLTDADMVTAPFGNENFSLPDPQIRVHAGFNSYVFAHGLFEDIVRRLETEHRRRPNLRLFT
1DT3	MGYP000149088673	165	108	4	74	237	13	168	1	3.71e-10	344	269	218	KLIVLSFRGSRSIENWIGNLNFDLKEINDICSGCRGHDGFTSSWRSVADTLRQKVEDAVREHPDYRVVFTGHSLGGALATVAGADLRGNGYDI-DVFSYGAPRVGNRAFAEFLTVQTGGTLYRITHTNDIVPRLPPREFGYSHSSPEYWIKSGTLVPVTRNDIVK	SAVAVTFRSSDNKDNWLSNLKAIRHAPNEVLEHGRMHKGFYQAGSAFIPALRDAIGKLRADRQ-IPVSFFGHSRGGPLAMFAAFALR-NIFPVLDVITFGAPRWCDKVLAREYDMALGARTIKVVNNNDIVPHLPPWRLGWQHVGRLWYIDR-------RGRVSR	3.000,-17.934,-9.347,4.933,-15.921,-7.053,4.594,-16.895,-3.569,2.838,-13.903,-2.395,2.870,-14.345,1.358,0.886,-12.829,4.178,1.698,-12.992,7.888,-1.114,-12.565,10.424,0.266,-11.739,13.861,-1.644,-11.082,17.067,-1.190,-8.507,19.806,-3.641,-7.833,22.790,-4.490,-4.516,21.222,-4.615,-5.278,17.537,-4.238,-7.872,14.695,-1.371,-7.092,12.313,-1.586,-8.338,8.664,1.779,-8.003,6.843,2.046,-8.642,3.070,5.518,…	QGSDRCLVSWHPSAVAVTFRSSDNKDNWLSNLKAIRHAPNEVLEHGRMHKGFYQAGSAFIPALRDAIGKLRADRQIPVSFFGHSRGGPLAMFAAFALRNIFPVLDVITFGAPRWCDKVLAREYDMALGARTIKVVNNNDIVPHLPPWRLGWQHVGRLWYIDRRGRVSRDVHTLPFWDRFMGRVEDLGRPGLDAVKDHSGDNLSAYLDPLLAAVGRDET
1DT3	MGYP000158246851	208	131	10	1	204	8	170	0.999	0.003277	97	269	243	EVSQDLFNQFNLFAQYSAAAYCGKNND---APAGTNITCTGNACPEVEKADATFLYSFEDSGVGDVTGFLALDNTNKLIVLSFRGSRS-IENWIGNLNFDLKEINDICSGCRGHDGFTSSWRSVADTLRQKVEDAVREHPDYRVVFTGHSLGGALATVAGADLRGNGYDIDVFSYGAPRVGNRAFAEFLTVQTGGTLYRITHTNDIVP	PQSIESQFAAYLVDQTY--------NDIDKRPTKVLNR---------------FV-RVPEYDTDHV--SVWLDNDTGEYTVTVRGTRAQTSDILED-------IGVLVGN-------TNP---NSMELDAVLDKFEANNPHVKYDVACHSLGASFVNKEQAEHGVNWDNVFIFNPGSSPMQSDKFETEMANNQQ--YEYFVNHGDPIS	4.685,14.758,-21.131,1.743,16.750,-20.409,0.851,15.035,-17.312,-2.495,16.021,-16.565,-1.923,17.109,-13.126,-5.355,16.674,-12.586,-6.489,13.723,-11.271,-7.492,14.483,-8.019,-6.659,12.086,-5.439,-9.559,10.168,-4.291,-10.216,10.199,-0.589,-9.817,6.436,-0.671,-6.315,6.705,-2.113,-5.391,9.184,0.606,-6.698,6.774,3.298,-4.781,3.982,1.560,-1.546,6.053,1.735,-2.108,6.634,5.418,-2.783,2.919,6.102,0.467,1.9…	FGVDKTKPQSIESQFAAYLVDQTYNDIDKRPTKVLNRFVRVPEYDTDHVSVWLDNDTGEYTVTVRGTRAQTSDILEDIGVLVGNTNPNSMELDAVLDKFEANNPHVKYDVACHSLGASFVNKEQAEHGVNWDNVFIFNPGSSPMQSDKFETEMANNQQYEYFVNHGDPISSNLVHHMSHDTVQNTVFGDYQYSPIGSHSITQWFPEGFAKPDDQPLRYDNQETSFETAELQQDTKESREADLS
1DT3	MGYP000160607098	185	114	11	1	177	25	185	1	0.0001096	145	269	200	EVSQDLFNQFNLFAQYSAAAYCGKNNDAPAGTNITCTGNACPEVEKADATF--LYSFEDSGVGDVTGFLALDNTNKLIVLSFRG-SRSIENWIGNLNFDLKEINDICSGCRGHDGFTSSWR-SVA----DTLRQKVEDAVREHPDYRVVFTGHSLGGALATVAGADLRGNGYDIDVFSYGAPRVG	DVSESLFDKMIQAKNFSLLI--DRTSNGP-------IENMVDDLRNAHARFDGWGDFRDQTL--VAKA------DGVCYAAFMATSGEVLGSIQNANFIPRLVN----GRAVWRAFWASYQSVVCRDKFNKALKGCAESCKE-TQCPLILTGFSKGGAAAVVGSIDL--EHYNPTAIAFGAPKAV	32.901,-27.580,-31.019,31.196,-29.434,-28.370,29.489,-27.464,-25.889,30.043,-28.864,-22.592,26.943,-28.556,-20.862,27.957,-28.675,-17.358,24.931,-29.539,-15.491,23.567,-27.172,-13.124,23.551,-28.939,-10.004,20.542,-27.776,-8.370,21.721,-26.951,-5.148,19.376,-28.509,-3.045,19.053,-25.756,-0.974,18.357,-26.999,2.322,15.604,-24.924,2.836,14.866,-25.262,6.306,11.912,-27.335,6.853,9.523,-24.763,6.634,…	MMMNTKGCVAAQSEYPDYPSKIAFDVSESLFDKMIQAKNFSLLIDRTSNGPIENMVDDLRNAHARFDGWGDFRDQTLVAKADGVCYAAFMATSGEVLGSIQNANFIPRLVNGRAVWRAFWASYQSVVCRDKFNKALKGCAESCKETQCPLILTGFSKGGAAAVVGSIDLEHYNPTAIAFGAPKAVCNFQKCNAINPSKHF
1DT3	MGYP000160661698	276	172	13	1	258	33	280	1	1.839e-13	377	269	291	EVSQDLFNQFNLFAQYSAAAYCGKNNDAPAGTNITCTGNACP----EVEKADATFLYSFE----DSGVGDVTGFLALDNTNKLIVLSFRGSRSIENWIGNLNFDLKEINDICS----GCRGHDGFTSSW-RSVADTLRQKVEDAVREHPDYRVVFTGHSLGGALATVAGADLRGNGYDIDVFSYGAPRVGNRAFAEFLTVQTGGTLYRITHTNDIVPRLPPREFGYSHSSPEYWIKSGTLVPVTRNDIVKIEGIDATGGN-----NQPNIPDIPAH	SFSPEM--KARWMVDSAMLTY----GRA----GGKRLNDKQLGEFFRRGG----FTHTIRNDTWLKNDAGCWAFFASN--DDWAVLSFRGTADIKDALTDADATMYHETNLAHPPSERAMVHKGFLTYLNRMWFSEVLGWLDAYRLSHPTAEIFFTGHSLGGALATLAAGRYHGN---ISLYTFGCPRVGNAVFSDAVAEAVGEKWFRYVDGNDVVTRMPPVALDYTHGGQRIHVGS--NDPPFI-------GMESGKVDLAQFLKPEPVPDLADH	-4.834,-27.163,-13.357,-3.095,-25.844,-16.174,-4.284,-22.401,-16.101,-1.538,-20.824,-14.623,0.969,-20.260,-17.088,-0.787,-17.751,-18.984,-0.518,-15.566,-16.184,3.024,-15.341,-16.533,2.646,-13.538,-19.480,0.261,-11.270,-18.963,0.335,-8.628,-21.251,-0.727,-5.968,-18.972,-3.817,-6.349,-20.792,-4.651,-9.590,-19.504,-3.832,-9.169,-16.052,-7.109,-8.665,-15.354,-8.797,-11.163,-16.947,-8.273,-12.621,-13.…	MSKSKDLLNPTWTNLFQVPVYPYFEDGPHDPHSFSPEMKARWMVDSAMLTYGRAGGKRLNDKQLGEFFRRGGFTHTIRNDTWLKNDAGCWAFFASNDDWAVLSFRGTADIKDALTDADATMYHETNLAHPPSERAMVHKGFLTYLNRMWFSEVLGWLDAYRLSHPTAEIFFTGHSLGGALATLAAGRYHGNISLYTFGCPRVGNAVFSDAVAEAVGEKWFRYVDGNDVVTRMPPVALDYTHGGQRIHVGSNDPPFIGMESGKVDLAQFLKPEPVPDLADHSPGRYLYYVWE
1DT3	MGYP000161188506	208	124	12	1	203	11	169	1	0.002262	104	269	188	EVSQDLFNQFNLFAQYSAAAYCGKNNDAPAGTNITCTGNACPEVEKADATFL---YSFEDSGVGDVTGFLALDNTNKLIVLSFRGS-RSIENWIGNLNFDLKEINDICSGCRGHDGFTSSWRSVADTLRQKVEDAVREHPDYRVVFTGHSLGGALATVAGADLRGNGYDIDVF-SYGAPRVGNRAFAEFLTVQTGGTLYRITHTNDIV	KLTEEEHMYAHLIQQTY-------EDNRPR----SYEG----------WERLHEYDSKY--------GTIWRNRNDKRYVVTVRGTKKHLADWWKD--------AKILAG-------SSSVQ--DNDLNDSIKRFVEDHPRQKYDIASHSLGSELVMNGVEQNSFDPEEIILFNPGSSPF-QNKEHIKTHADNPA--VHMFLNKRDPL	-16.391,13.426,3.633,-18.289,16.583,3.886,-17.127,19.102,1.526,-15.244,21.366,3.954,-13.538,19.609,6.507,-10.164,20.757,7.117,-8.187,17.634,6.589,-5.003,19.038,7.714,-5.692,17.832,11.114,-7.266,14.662,10.503,-5.957,12.091,12.736,-5.452,8.645,11.291,-8.217,6.298,12.106,-7.293,3.181,14.133,-7.534,1.257,10.906,-5.184,3.538,8.890,-2.719,3.341,11.834,-2.957,-0.457,11.632,-2.335,-0.400,7.862,0.838,1.76…	LHAGEDISDRKLTEEEHMYAHLIQQTYEDNRPRSYEGWERLHEYDSKYGTIWRNRNDKRYVVTVRGTKKHLADWWKDAKILAGSSSVQDNDLNDSIKRFVEDHPRQKYDIASHSLGSELVMNGVEQNSFDPEEIILFNPGSSPFQNKEHIKTHADNPAVHMFLNKRDPLSSFYSQVLDDESDKRAVFG
1DT3	MGYP000164166602	163	98	6	63	209	48	201	1	1.343e-07	222	269	215	VTGFLALDNTNKLIVLSFRGSRSIENWIGNLNFDLKEI---NDICS----GCRGHDGFTSSWRSVADTLRQKVEDAVRE---------HPDYRVVFTGHSLGGALATVAGADLRGNGYDIDVFSYGAPRVGNRAFAEFLTVQTGGTLYRITHTNDIVPRLPPR	NPYCITIDHEWKSVVLTIRGTLSLEDAVTDLSIRPASLSKWGERCSFDGEGEYCHEGMLV---SAEWVLRDLEKHGILDKLLLASDCRYPGYRLYVAGHSLGAGCAAILALMLKPKFSSLKCLCFEPPAVLTARVAE----QTFITSFVL--DADIVPRLSYH	-17.636,-19.549,23.076,-15.394,-17.282,21.183,-14.135,-19.317,18.470,-10.736,-18.240,18.628,-9.841,-18.442,15.205,-7.119,-20.695,15.951,-4.771,-19.452,13.699,-2.322,-22.042,13.861,0.651,-20.324,14.986,2.242,-22.401,12.484,2.058,-19.940,10.048,3.978,-17.355,11.132,6.914,-18.371,9.441,9.042,-15.658,10.606,10.973,-13.518,8.419,14.398,-14.484,9.504,15.740,-11.472,8.145,14.240,-8.939,10.087,13.069,-10…	KRSCCCWSKDKVAGDTLCGCNLLAMLREAGLDEDDIAYAQFGVSVERNPYCITIDHEWKSVVLTIRGTLSLEDAVTDLSIRPASLSKWGERCSFDGEGEYCHEGMLVSAEWVLRDLEKHGILDKLLLASDCRYPGYRLYVAGHSLGAGCAAILALMLKPKFSSLKCLCFEPPAVLTARVAEQTFITSFVLDADIVPRLSYHSLENLRDDMLDLIA
1DT3	MGYP000164554961	299	179	18	1	264	85	350	1	1.624e-09	285	269	359	EVSQDLFNQFNLFAQYSAAAYCGKNNDAPAGTNITCTGNACPEV-EKADATFLYSF-EDSGVGD--VTGFLALDNTNKLIVLSFRGSRS----IENWIGNLNFDLKEINDICSGCRGHDGFTSSWRSVADTLRQKVEDAVREHPDYRVVFTGHSLGGALATVAG-----------ADLRGNGYDIDVFSYGAPRVGNRAFAE--FLTVQTGGTLYRITHTNDIVPRLP--PREF--GYSHSSPEYWIKSGTLVPVTRND-IVK-----IEGIDATGGNNQPNIPDI----PAHLWYFGL	NYQPELSYKMLLLSSVT-YSEHEH-------------QKCMNKAVPQDKFQVESVVTRPCDAIKSKCSGFVAFSHVLQVIVIAFRGTKDPFQLMDELLETLFVPSEDF----LGGKVQSYWKRSFVVLWKDIEPRLKSLISAYPSYQVWVTGHSLGAAIASVASAWIAYKRMVPREN-------IILYTFGMPRVGDYKYALQHDQLVH---NSWRVVNFDDIVPRVPLFTPGLPGGAYHHGQELFYTKPAL---NICSPHKECHGKPTDEDL--TCSRGLAITDLQQSVKHHLEYFGV	-32.432,-23.157,-1.315,-30.584,-22.054,-4.288,-28.067,-19.378,-3.794,-28.677,-18.090,-7.090,-31.235,-15.694,-6.530,-29.797,-13.105,-4.562,-27.358,-12.025,-7.028,-29.838,-10.853,-9.389,-31.162,-8.271,-7.254,-28.101,-6.452,-6.921,-27.621,-5.840,-10.481,-30.824,-4.108,-11.096,-30.547,-1.259,-8.972,-27.700,0.436,-10.473,-29.376,1.887,-13.539,-30.468,5.178,-12.401,-28.706,8.322,-12.812,-26.610,9.497,-…	MSFSSQNRKLQSSLKRNESPASTTLKNSHFSEFLQRFHCGVFIMFDLRMGFAFVVLVSAPVFPNAIRSEEGVRIKTLRNYHKTFNYQPELSYKMLLLSSVTYSEHEHQKCMNKAVPQDKFQVESVVTRPCDAIKSKCSGFVAFSHVLQVIVIAFRGTKDPFQLMDELLETLFVPSEDFLGGKVQSYWKRSFVVLWKDIEPRLKSLISAYPSYQVWVTGHSLGAAIASVASAWIAYKRMVPRENIILYTFGMPRVGDYKYALQHDQLVHNSWRVVNFDDIVPRVPLFTPGLPGGAYHHGQELFYTKPALNICSPHKECHGKPTDEDLTCSRGLAITDLQQSVKHHLEYFGVRPGSYCATY
1DT3	MGYP000167334648	222	136	10	5	206	17	208	1	6.837e-08	248	269	388	DLFNQFNLFAQYSAAAYCGKNNDAPAGTNITCTGNACPEVEK----ADATFLYSFEDSGV-------GDVTGFLALDNTNKLIVLSFRGSRSIENWIGNLNFDLKEINDICSGCRGHDGFTSSWRSVADTLRQKVEDAVREHP-----DY---RVVFTGHSLGGALATVAGADLRGNGY-DIDVFSYGAPRVGNRAFAEFLTVQTGGTLYRITHTNDIVPRL	EFLACIQHWRAMAEAVY-------------VCEASSFSLMTQLPESA--------VVHAEWNADRNTMRPAYVVCVDVPFASVVVSLRGTSNIADMLTSAGACPEAF----YGGQAHGGYVKATQALLDEIQPHLLKAFSRGPMGDGAKSKRLKLVLVGHSMGGAIAIMAGMELR-HAYPGLRCWSFSTPACVSHELASESAK----FATSVVSAYDVVPRF	14.013,15.540,4.931,10.382,16.040,4.882,9.631,19.403,3.668,9.609,22.117,6.236,6.149,22.927,7.699,4.496,20.003,8.412,2.388,20.064,11.308,2.519,16.936,12.960,-0.864,16.025,13.591,-0.082,15.610,17.173,-3.666,14.705,17.689,-3.281,11.680,15.428,0.072,10.595,16.953,-1.607,10.681,20.408,-4.868,9.060,19.431,-4.641,5.617,21.014,-7.681,4.376,19.048,-6.226,5.450,15.736,-2.857,3.861,16.642,-4.645,0.602,17.68…	PPPPGRLADEKMSRNPEFLACIQHWRAMAEAVYVCEASSFSLMTQLPESAVVHAEWNADRNTMRPAYVVCVDVPFASVVVSLRGTSNIADMLTSAGACPEAFYGGQAHGGYVKATQALLDEIQPHLLKAFSRGPMGDGAKSKRLKLVLVGHSMGGAIAIMAGMELRHAYPGLRCWSFSTPACVSHELASESAKFATSVVSAYDVVPRFSLVALEGLRKQLIEFSPKIARTILENDPHWKSVIWTIDTQEVTMGVCRSLREKFLQGIGWCQPTSKQSKDETPQPPCPAVALYPPGRLIVLVAEPPGCGKLPQSRSNVPQSRNFGAYPSFEESLHTKWKLLVAKHEEFLQLIVSPWSVSDHMLGNICEGIAYLQAQCSPLSLSSCEELFL
1DT3	MGYP000167815094	169	107	6	53	219	4	159	1	1.83e-09	284	269	170	YSFEDSGVGDVTGFLALDNTNKLIVLSFRG-SRSIENWIGNLNFDLKEINDICSGCRGHDGFTSSWRSVADTLRQKVEDAVREHPDYRVVFTGHSLGGALATVAGADLRGNGYDIDVFSYGAPRVGNRAFAEFLTVQTGGTL-YRITHTNDIVPRLPPREFGYSHSSPE	HSFPTRRSSDLNDFAVVSHFKDAIVFSFAGSNGEWKDWISNLK------LGLFSSA-RHEGIFKSFR----PFKKRILALIKLYPDKKVYVTGHSRGGGLGIICSRFLAENYITCARIVFGAPKVFGKEYTG--KAIRHFTEFYTVINGYDPVPLLPPRTFGYALSGRM	-10.926,-18.199,4.716,-13.445,-16.477,2.640,-11.990,-14.879,-0.349,-13.379,-11.834,-1.924,-11.884,-10.448,-5.044,-12.207,-6.821,-5.865,-11.816,-6.386,-9.498,-11.711,-2.963,-10.849,-13.853,-2.863,-13.761,-11.957,-0.345,-15.276,-9.048,-0.037,-17.249,-7.942,-1.774,-20.061,-4.690,-1.985,-18.809,-4.417,-2.229,-15.255,-6.258,-4.754,-13.517,-6.076,-3.277,-10.338,-7.012,-5.924,-8.029,-7.398,-6.411,-4.391…	PLLHSFPTRRSSDLNDFAVVSHFKDAIVFSFAGSNGEWKDWISNLKLGLFSSARHEGIFKSFRPFKKRILALIKLYPDKKVYVTGHSRGGGLGIICSRFLAENYITCARIVFGAPKVFGKEYTGKAIRHFTEFYTVINGYDPVPLLPPRTFGYALSGRMVNFRMPWYYRV
1DT3	MGYP000168043087	269	145	16	9	257	19	252	1	1.09e-12	364	269	313	QFNLFAQYSAAAYCGKNNDAPAGTNITCTGNACPEVEKAD------ATFL---YSFEDSGVGDVTGFLALDNTNKLIVLSFRGSRS-IENWIG-NLNFDLKEI-NDICSGCRGHDGFTSSWRSVADTLRQKVEDAVREHPDYRVVFTGHSLGGALATVAGADLRGN-GYDI-DVFSYGAPRVGNRAFAEFLTVQTGGTLYRITHTNDIVPRLPPREF------GYSHSSPEYWIKSGTLVPVTRNDIVKIEGIDATGGNNQPNIPDIPA	NAFLMALPSFFIY-------P-AS-ITWRGGMWQQFEAFFNELSDADPFSVEPFTRERKGI-DIQAAVIVN--SRLILVIFRGSESKTADWLGTNANHAWRSVHPDWGSGIRVHSGFYNALREIYHDMRAFIR---ARDNSRRVFLGGHSLGGALAILCGYRLQKVGGIDVQGIYTWGAPRVGNDDWAAHFNTLMQGRCYRWVKGADFAAGFPDVNVTPGIGQAYFHVGELNYIHQ-------DGSVNL-------------NIPDFDA	-17.374,1.538,20.096,-18.173,0.152,16.904,-15.325,-2.009,15.799,-14.922,-0.946,12.174,-12.302,-3.520,11.627,-14.908,-6.191,12.236,-15.894,-5.335,8.684,-12.451,-6.164,7.449,-13.092,-9.063,5.146,-10.037,-11.174,5.634,-11.457,-14.087,3.674,-12.192,-12.174,0.728,-10.560,-13.241,-2.359,-11.512,-10.236,-4.206,-11.403,-6.516,-3.986,-13.309,-5.050,-0.983,-14.165,-1.397,-0.846,-14.254,-1.786,2.951,-10.743…	MPDIYRYFRADYEKHSKTNAFLMALPSFFIYPASITWRGGMWQQFEAFFNELSDADPFSVEPFTRERKGIDIQAAVIVNSRLILVIFRGSESKTADWLGTNANHAWRSVHPDWGSGIRVHSGFYNALREIYHDMRAFIRARDNSRRVFLGGHSLGGALAILCGYRLQKVGGIDVQGIYTWGAPRVGNDDWAAHFNTLMQGRCYRWVKGADFAAGFPDVNVTPGIGQAYFHVGELNYIHQDGSVNLNIPDFDATGATMFADHDMKKYTLKMMSELSDRERSAATNPGYLVEKDVIQLTVPLLNRPLTAVIAAGE
1DT3	MGYP000173184399	228	136	9	10	234	4	197	1	3.84e-13	406	269	228	FNLFAQYSAAAYCGKNNDAPAGTNITCTGNACPEVEKADATFLYSFEDSGVGDVTGFLALDNTNKLIVLSFRGSRSIENWIGNLNFDLKEINDICSGCRGHDGFTSS-WRS-VADTLRQKVEDAVREHPDYRVVFTGHSLGGALATVAGADLR-GNGYDIDVFSYGAPRVGNRAFAEFLTVQTGGTLYRITHTNDIVPRLPPREFGYSHSSPEYWIKSGTLVPVTRND	YSELLTYSKDIYKSENQAQNFYSD--------PK-----------------TDLQVGIYI---TDKICISFRGTESKKDMSYDVYRIKKNM---GGGKYVHGGFYDQLFSSDVYQSFNKFVTRLIYET-DLDIYVTGHSLGGALATLYGYELSKKTTKQINVVSFASPKVGNWAFFKDFKKIKNLSHVRIANSRDPVTLFPL--FNYYHTGKIITLKSTSYFYSVNNH	-1.765,7.625,19.200,-3.413,9.094,16.275,-4.491,6.538,13.583,-1.810,7.474,11.051,1.043,7.348,13.659,-0.193,3.894,14.760,-0.461,2.525,11.173,3.024,3.987,10.431,4.273,2.089,13.545,2.955,-1.241,12.054,4.508,-0.267,8.660,7.797,0.249,10.454,7.702,-2.763,12.802,7.315,-5.266,9.914,11.048,-4.462,9.100,12.344,-5.345,12.697,11.305,-8.961,12.716,8.590,-11.628,13.182,7.913,-10.985,16.800,5.591,-8.106,16.820,2…	MDLYSELLTYSKDIYKSENQAQNFYSDPKTDLQVGIYITDKICISFRGTESKKDMSYDVYRIKKNMGGGKYVHGGFYDQLFSSDVYQSFNKFVTRLIYETDLDIYVTGHSLGGALATLYGYELSKKTTKQINVVSFASPKVGNWAFFKDFKKIKNLSHVRIANSRDPVTLFPLFNYYHTGKIITLKSTSYFYSVNNHYVKMYEKYINKKNKIINDKYVNIYKDKTIGL
1DT3	MGYP000181865823	180	113	7	61	237	36	194	1	4.884e-09	297	269	195	GDVTGFLALDNTNKLIVLSFRGSRSIENWIGNLNFDLKEINDICSGCRGHDGFTSSWRSVADTLRQKVEDAVREHP-DYRVVFTGHSLGGALATVAGADL--RGNGYDIDVFSYGAPRVGNRAFAEFLTVQTGGTLYRITHTNDIVPRLPPREFGYSHSSPEYWIKSGTLVPVTRNDIVK	TDTQALV-EEHHDGRWIVVFPGTSSCDDWRTDFRFFKMPWYL---GGAVHRGFRNAYISVDSQIINR-------VPRGADVIVSGHSLGGALATLCAHALQHHCNVTDAILL--ASPRVGNGEFARRYNRELGHVTSRVVAPHDPVPYVPLWIMGNRHVNTEVYLGD--------TGVKI	9.432,-6.819,22.354,8.837,-7.144,18.756,5.428,-6.326,18.176,3.468,-9.243,17.451,2.344,-8.911,14.018,-1.223,-10.030,13.876,-0.756,-11.541,10.498,-4.001,-13.270,9.184,-3.105,-15.642,6.216,-6.784,-15.894,5.146,-7.134,-12.070,4.983,-3.786,-11.803,3.128,-5.004,-14.420,0.605,-8.328,-12.515,0.221,-6.422,-9.237,-0.419,-4.125,-11.058,-2.943,-7.248,-12.344,-4.800,-8.717,-8.783,-5.000,-5.372,-7.427,-6.308,-…	MKPSCNFDPELALHCAKLVKALYDGDADPNVVNEQTDTQALVEEHHDGRWIVVFPGTSSCDDWRTDFRFFKMPWYLGGAVHRGFRNAYISVDSQIINRVPRGADVIVSGHSLGGALATLCAHALQHHCNVTDAILLASPRVGNGEFARRYNRELGHVTSRVVAPHDPVPYVPLWIMGNRHVNTEVYLGDTGVKIG
1DT3	MGYP000182683741	203	113	9	1	193	42	217	1	8.259e-12	367	269	220	EVSQDLFNQFNLFAQYSAAAYCGK-----NNDAPAGTNITCTGNACPEVEKADATFLYSFEDSGVGDVTGFLALDNTNKLIVLSFRGSRSIENWIGNLNFDLKEINDICSGCRGHDGFTSSWRSVADTLRQKVEDAVREHPDYRVVFTGHSLGGALATVAGAD-----LRGNGYDIDVFSYGAPRVGNRAFAEFLTVQTGGTL	VFDWKL---ANVSVELSRLAYCEDTEATLHSNI----------AHIPK----DLTILT----NMLG-TKGFVAKSISESTIYVVYAGTDKILDWVVDFDAELVKYDG-CDECEVHQGFQVTEKFGFPLVLFEVSLQKFMHPSYSVVVAGHSKGAAEATIAAADFIDAGIP----DIFLVNFGSPRVGNTAFAEFVSSHVKNHY	-26.015,-56.396,21.720,-28.425,-53.891,23.057,-28.266,-50.184,22.077,-29.153,-47.967,24.894,-31.063,-44.926,23.751,-30.273,-42.118,25.983,-33.229,-39.926,25.756,-32.099,-36.587,26.635,-35.323,-35.182,27.257,-34.289,-31.745,27.654,-37.141,-30.469,29.658,-36.416,-26.969,29.108,-39.200,-25.704,31.015,-40.642,-22.741,29.141,-40.181,-20.268,31.719,-41.438,-17.369,29.850,-39.107,-15.170,31.965,-36.185,…	KESSRINFGCCLTRNPKFNSFVMLIYLYFILLTMYVSLAAAVFDWKLANVSVELSRLAYCEDTEATLHSNIAHIPKDLTILTNMLGTKGFVAKSISESTIYVVYAGTDKILDWVVDFDAELVKYDGCDECEVHQGFQVTEKFGFPLVLFEVSLQKFMHPSYSVVVAGHSKGAAEATIAAADFIDAGIPDIFLVNFGSPRVGNTAFAEFVSSHVKNHYRVT
1DT3	MGYP000182753330	173	97	13	21	168	17	168	0.138	1.579	35	269	348	YCGKNND-APAGTNITCTGNACPEVEKA-DATFLYSFEDSGVGDVTGFLALD-----NTN-KLIVLSFRGSRS----IENWIGNLNFDLKEINDIC--------SGC---RGH--DGFTSSWRSVADTLRQKVEDAVREHPDYRVVFTGHSLGGALATVAGADLRGNGYDIDV	GCTSLPQKNPAPDFYLAYPG-------ASDT---KVLE--THDGL--KLYGQWWEPAETQPRAIVLLLHGTAAHTGVYAPWANH-------LVDHGYAMFAFDMRGWGQSQGFGRAGYTSAPDDYLGDVSLAYEEVRRRYPDVPVYLQGESLGAAVALQWDIRGNDSTDGLIL	46.963,28.732,1.262,45.240,26.177,-0.649,43.199,27.548,-3.334,39.713,26.302,-3.235,38.949,25.383,-6.726,35.547,26.687,-7.541,33.888,24.072,-9.446,31.841,25.889,-11.817,28.831,23.921,-12.182,27.935,24.811,-15.650,24.290,24.906,-16.052,23.580,22.244,-18.318,20.492,23.683,-19.365,20.006,21.250,-21.859,17.211,22.076,-24.091,14.548,20.519,-22.350,12.764,19.795,-25.431,9.085,19.935,-25.411,8.175,17.389…	MKKASLFTVAPMLALIGCTSLPQKNPAPDFYLAYPGASDTKVLETHDGLKLYGQWWEPAETQPRAIVLLLHGTAAHTGVYAPWANHLVDHGYAMFAFDMRGWGQSQGFGRAGYTSAPDDYLGDVSLAYEEVRRRYPDVPVYLQGESLGAAVALQWDIRGNDSTDGLILNAPPVVINLKIAPLPQPDWLANGFAWHAGLIGRLFPNAPIYSMGGRTGKWMWRRAIFDEWSREWVANEVNMTHSAIAASYVTNLQKMSAEIRSNFDKIDKPMIVLQGGEDNLVSHKAAKRLIEETPSSEMKKWHFYEDASHCALHDSNKEDVWDDIIDWLDIMTESESSRFVEPQKVSAL
1DT3	MGYP000184451726	257	164	14	2	228	11	257	1	1.192e-09	268	269	290	VSQDLFNQF-------NLFAQYSAAAYCGKNNDAPAGTNITCTGNA--CPEVEKADATFLY----SFEDSGVGDVT-----GFLALDNTNKLIVLSFRGSRSIENWIGNLNFDL--KEINDIC--SGCRGHDGFTSSWRSVADTLRQKVEDAVREHPDYRVVFTGHSLGGALATVAGADLRGNGYDIDVFSYGAPRVGNRAFAEF---LTV---QTG-GT-LYRITHTNDIVPRLPPREFGYSHSSPEYWIKSGTLV	LSPADITKFKTCNFLVNVLSQMYEQWQKTPLGFKWIPSS-TCQYDHGYCVS----DFTFGEIIWSEF--LTPNGVLHNEPFGCIIKHNATASQYLIFRGSKSLPDFVKDFEIKLLTYRAPTLNPPSNINVGKGWWSVYSGLRISLIEKLRQV---ETDAPLTISGHSLGSTLATLATPEAIALGFQVEHFNSASPKVGDFNFKQYYESLRVLNSSAGRLLDSFRLVNTADFVPDFPFGNTGFEHVGIRIFFEARYGD	18.930,-10.819,10.905,17.342,-13.528,9.042,14.405,-12.294,7.198,11.489,-14.220,8.279,9.811,-15.544,5.238,6.443,-17.159,5.675,4.647,-19.240,3.033,1.109,-17.803,2.404,-0.395,-21.242,3.343,1.255,-20.958,6.814,-0.243,-17.502,7.515,-2.988,-17.177,10.163,-6.639,-17.122,8.937,-6.970,-13.705,10.581,-4.008,-12.227,8.618,-5.274,-13.894,5.398,-8.644,-12.187,6.046,-6.872,-8.781,6.463,-4.969,-9.274,3.165,-8.3…	MIFMEIPLKDLSPADITKFKTCNFLVNVLSQMYEQWQKTPLGFKWIPSSTCQYDHGYCVSDFTFGEIIWSEFLTPNGVLHNEPFGCIIKHNATASQYLIFRGSKSLPDFVKDFEIKLLTYRAPTLNPPSNINVGKGWWSVYSGLRISLIEKLRQVETDAPLTISGHSLGSTLATLATPEAIALGFQVEHFNSASPKVGDFNFKQYYESLRVLNSSAGRLLDSFRLVNTADFVPDFPFGNTGFEHVGIRIFFEARYGDEEKNHDPCSCYGYALEHPSSPINPKPNMCHIPK
1DT3	MGYP000191308133	236	143	13	13	240	31	240	1	1.553e-10	321	269	282	FAQYSAAAYCGKNNDAPAGTNITCTGNACPEVEKAD-ATFLYSFEDSGVGD---VTGFLALDNTNKLIVLSFRGSRSIENWIGNLNFDLKEINDICSGCRGHDGFTSSWRSVADTLRQKVEDAVREHPDYRVVFTGHSLGGALATVAGADL----RGNGYDIDVFSYGAPRVGNRAFAEFLTVQTGGTLYRITHTNDIVPRLPPREFGYSHSSPEYWIKSGTLVPVTRNDIVKIEG	MARLAKEVY----KKTSSNNQM-PDEDMILTSIKNDDDRFISV---FGV-DNNSAQAALIEH--EEYLCITFRGTNEVADWLDNINAFSTNE----LFGEFHRGFYQSVEDVWPKLDSKCKALQRE-KKRPVFFAGHSLGGAMATIAAAKYIHEDKPFT-SVY--TFGQPRALTRVTSQFFNVECKNRFFRFHNNNDIVTRVPARLMGYSHVGSYLYISEEKL-------IHQDPG	-34.174,10.519,-6.279,-30.963,11.919,-5.182,-31.363,11.089,-1.633,-31.139,7.483,-2.230,-27.889,7.493,-3.882,-26.240,8.870,-0.933,-27.315,6.221,1.399,-26.503,3.398,-0.780,-23.280,4.925,-1.154,-22.865,5.256,2.352,-23.637,1.720,2.872,-21.356,0.358,0.290,-18.783,2.558,1.293,-19.064,1.718,4.766,-18.916,-1.937,4.686,-15.727,-3.747,4.639,-16.087,-7.322,3.450,-13.961,-8.764,6.128,-13.514,-12.221,4.750,-1…	MWFNISRSMEAIMNTVSPYKTSLDQGNAYWMARLAKEVYKKTSSNNQMPDEDMILTSIKNDDDRFISVFGVDNNSAQAALIEHEEYLCITFRGTNEVADWLDNINAFSTNELFGEFHRGFYQSVEDVWPKLDSKCKALQREKKRPVFFAGHSLGGAMATIAAAKYIHEDKPFTSVYTFGQPRALTRVTSQFFNVECKNRFFRFHNNNDIVTRVPARLMGYSHVGSYLYISEEKLIHQDPGFWFRFVDYFDGALSALREKGIDGVEDHDMGRYLDAIEKWALE
1DT3	MGYP000209221695	202	120	11	1	189	37	216	1	9.472e-11	323	269	223	EVSQDLFNQFNLFAQYSAAAYCGKNNDAPAGTNITCTGNACPEVEKADATFLYSF---EDSGVGDVTGFLALDNTNKLIVLSFRGSRS--IENWIGNLNFDLKE----INDI-CSGCRGHDGFTSSWRSVADTLRQKVEDAVREHPDYRVVFTGHSLGGALATVAGADL---RGNGYDIDVFSYGAPRVGNRAFAEFLTVQT	LLSSSQVTAFQDPAHWAEASYC---NPQ---IGNTVNT----------AQVLYAAGDGRDIP--RV--YVAYSSSKDTIVVSHQGTNTSSLASIENDIDIAADSPDPRLAGCVPAGSKIHSGFQDTWAQTADDVLAAVMSAQASHPSASVLVTGHSLGAAISAIDAAYLKCKGVSDVTTTL--FGQPRTGNYIFASSLSLTH	23.124,47.813,35.495,25.264,44.703,35.355,24.518,41.789,33.053,25.327,38.347,34.541,26.573,35.723,32.193,24.305,32.810,31.693,26.103,29.507,32.013,25.136,27.162,29.276,24.887,23.598,30.485,26.095,21.358,27.706,24.341,18.115,27.937,26.712,15.101,27.855,26.350,12.681,25.017,24.536,9.612,26.077,26.336,6.745,24.455,23.799,4.564,22.890,25.212,1.150,22.882,24.884,-0.323,19.509,22.848,-3.292,19.520,25.1…	MQLLPLLSLVPLPLALAAPSSSALVARQQNSNAAPTLLSSSQVTAFQDPAHWAEASYCNPQIGNTVNTAQVLYAAGDGRDIPRVYVAYSSSKDTIVVSHQGTNTSSLASIENDIDIAADSPDPRLAGCVPAGSKIHSGFQDTWAQTADDVLAAVMSAQASHPSASVLVTGHSLGAAISAIDAAYLKCKGVSDVTTTLFGQPRTGNYIFASSLSLTHLGNYAGE
1DT3	MGYP000210904209	247	156	13	7	241	26	248	1	3.989e-11	346	269	286	FNQFNLFAQYSAAAYCG--KNN------DAPAGTNITCTGNACPEVEKA---DATFLYSFEDSGVGDVTGFLALDNTNKLIVLSFRGSRSIENWIGNLNFDLKEINDICSGCRGHDGFTSSWRSVADTLRQKVEDAVREHPDYRVVFTGHSLGGALATVAGADLR-GNGYDIDVFSYGAPRVGNRAFAEFLTVQTGGTLYRITHTNDIVPRLPPREFGYSHSSPEYWIKSGTLVPVTRNDIVKIEGI	YREYALSAERSKIAYLSYEEVKALWSGATAN-------SNPLINSVFEGVTNEP---KYYEDS-VSGL--NAYSWLQGRTLHFVFRGTAGLTDIKIDIQKDRVRLFPDNPSILVHRGFFTQLSSIRMQMLMEVEQ-LTSMID-VVHFSGHSLGGAVATLAAGVVATAAGCRVSCHTIGSPRVGNKAFVKWWAGLVS-DSVRIQNFKDPIPLLP-INGLYTHIHGAIEIND-------AGDVKIIEHD	27.332,-20.799,32.923,26.777,-22.848,29.842,23.274,-23.676,30.263,21.829,-20.483,29.089,23.322,-20.460,25.777,21.656,-23.538,24.668,18.207,-22.290,25.347,18.634,-19.351,23.282,19.640,-21.231,20.239,16.675,-23.534,20.337,14.194,-20.772,20.413,15.440,-19.221,17.347,15.400,-22.373,15.445,11.979,-23.009,16.428,10.862,-19.729,15.188,12.456,-20.391,12.137,10.989,-23.752,11.817,7.838,-22.432,12.678,8.11…	MLANSITFTLSVKRKQQQQQQQVIDYREYALSAERSKIAYLSYEEVKALWSGATANSNPLINSVFEGVTNEPKYYEDSVSGLNAYSWLQGRTLHFVFRGTAGLTDIKIDIQKDRVRLFPDNPSILVHRGFFTQLSSIRMQMLMEVEQLTSMIDVVHFSGHSLGGAVATLAAGVVATAAGCRVSCHTIGSPRVGNKAFVKWWAGLVSDSVRIQNFKDPIPLLPINGLYTHIHGAIEINDAGDVKIIEHDVPWYYRILRLPFEIYWRNPFANHACDLYIQRLMALGKF
1DT3	MGYP000215142365	145	97	10	63	203	24	144	0.967	0.151	75	269	167	VTGFLALDNTNKLIVLSFRGSR-SIENWIGNLNFDLKEINDICSGCRGHDGFTSSWRSVADTLRQKVEDAVREHPDYRVVFTGHSLGGALATVAGADLRGNG-YDIDVFSYGAPRV--GNRAFAEFLTVQTGGTLYRITHTNDIV	V--SVWKNTLTGEMTVAVRGTKMNASDLLSD-------IKL---------LF-GETKTDSKELDQVLDQIEFDYPKQQYNIAGHSLGTAIIATQQPEH-GDHWNNAYM--YNSASSPGQNDKYETDLANDNSYEW--FINHGDMV	-6.331,27.995,13.812,-9.017,26.144,11.825,-6.638,25.183,9.255,-5.530,22.490,11.068,-8.274,20.536,11.439,-8.045,17.367,9.822,-10.844,17.030,7.517,-13.645,15.590,9.355,-12.768,12.518,7.666,-9.722,12.180,9.485,-11.511,12.765,12.587,-12.732,9.329,12.349,-9.401,7.773,12.370,-7.380,7.004,15.477,-3.758,6.254,15.148,-2.558,2.906,16.744,1.008,3.719,17.965,1.796,0.083,18.959,2.144,-0.732,15.229,4.170,2.355…	DEKDRPSDALGRFERMPKYDTEHVSVWKNTLTGEMTVAVRGTKMNASDLLSDIKLLFGETKTDSKELDQVLDQIEFDYPKQQYNIAGHSLGTAIIATQQPEHGDHWNNAYMYNSASSPGQNDKYETDLANDNSYEWFINHGDMVSNNLLHFMNEDTLQNHVQFGDYA
1DT3	MGYP000222808628	212	145	10	13	211	2	197	1	2.415e-10	319	269	290	FAQYSAAAYCGKNNDAPAGTNITCTGNACPE-VEKADATFLYSFEDSGV--GDVTGFLALDNTNKLIVLSFRGSRSIENWIGN--LNFDLKEINDICSGCRGHDGFTSSWRSV-ADTLRQKVEDAVREHPDYRVVFTGHSLGGALATVAGADLR------GNGYDIDVFSYGAPRVGNRAFAEFLTVQTGG-TLYRITHTNDIVPRLPPREF	FIPLTEYAYCEN--------SLILIGQCCSKFIKNENWSLSYA---GSIDNYQFNYAILTNTRLKKVVITFSGTKKVTQFIEESVKQGGVAI---YKDTIKVMKYFAEIYFELEKKNFNGILKRILTPYAGYQVIFLGHSLGGAMASIMALDAVLSKSIVKTKTSPMILTYGQPRTGNDIFANE--VMKNIPIVFRVVREGDFIPNMPTCSI	-15.700,0.680,-1.892,-12.199,0.512,-0.463,-11.111,4.043,-1.287,-12.696,5.484,1.943,-10.861,2.809,3.905,-7.553,3.702,2.231,-8.148,7.331,3.103,-8.839,6.487,6.669,-5.066,6.133,7.224,-4.385,9.766,6.207,-6.387,10.996,9.085,-4.206,12.743,11.477,-2.667,10.889,14.243,-5.025,11.061,16.821,-7.006,8.161,17.394,-9.507,10.702,17.999,-9.225,12.099,14.697,-9.064,9.002,13.021,-12.458,8.487,14.306,-13.739,11.445,…	YFIPLTEYAYCENSLILIGQCCSKFIKNENWSLSYAGSIDNYQFNYAILTNTRLKKVVITFSGTKKVTQFIEESVKQGGVAIYKDTIKVMKYFAEIYFELEKKNFNGILKRILTPYAGYQVIFLGHSLGGAMASIMALDAVLSKSIVKTKTSPMILTYGQPRTGNDIFANEVMKNIPIVFRVVREGDFIPNMPTCSIATLFLDHDCKTVLPDQKFDPEYMIPDDDTKKEVIDNFMKWHIGGFIHYNADMTEYVNCGNEYGDNHKQEGCQLKMSFNPQYHRYFEEFRNAMC
1DT3	MGYP000223312433	253	133	13	1	220	6	228	1	4.594e-09	231	269	305	EVSQDLFNQFNL----------------FAQYSAAAYCGKNNDAPAGTNITCTGNACPEV---EKA-DATFLYSFEDSGVG--DVTGFLALDNTNKLIVLSFRGSR--SIENWIGNLNFDLKEINDICSGCRGHDGF----TSSWRSVADTLRQKVEDAVREHPDYRVVFTGHSLGGALATV-----AGADLRGNGYDIDVFSYGAPRVGNRAFAEFLTVQTGGTLYRITHTNDIVPRLPPREFGYSHSSPEY	ELPEDQYREDAFAAFDPAGEFSIGTARSMAWMSQLAY--ETR----------FPDKIERIGGLWGLREVRCLREPSGSTLPMPRTRGVLAA--TDEATILAFAGTDPLSLMNWITDFSLGRREAE-------IHKGFEAAAAAVWDETGSVIGQSMAAG------RRLFVTGHSLGAAIAAVTVDRAAGEVGLGR---SQTYLLGCPRVGRAAFAARYNEAFGATTYRLVHGKDVVAAVPPPELDFRHVGRYL	8.667,-11.768,-18.380,7.210,-10.488,-15.231,9.069,-11.585,-12.367,6.144,-11.374,-10.473,5.767,-14.618,-9.067,2.306,-15.224,-9.764,1.279,-17.054,-6.788,-0.339,-20.363,-7.442,-4.008,-20.242,-6.568,-3.507,-22.816,-3.843,-1.388,-20.315,-1.984,-4.446,-18.162,-1.429,-5.823,-19.989,1.604,-9.356,-19.768,2.845,-8.160,-18.661,6.212,-6.074,-15.878,4.690,-8.954,-13.512,4.939,-10.302,-13.235,8.439,-12.961,-11…	MSILVELPEDQYREDAFAAFDPAGEFSIGTARSMAWMSQLAYETRFPDKIERIGGLWGLREVRCLREPSGSTLPMPRTRGVLAATDEATILAFAGTDPLSLMNWITDFSLGRREAEIHKGFEAAAAAVWDETGSVIGQSMAAGRRLFVTGHSLGAAIAAVTVDRAAGEVGLGRSQTYLLGCPRVGRAAFAARYNEAFGATTYRLVHGKDVVAAVPPPELDFRHVGRYLACARGGKFDPADMLANADSDAPSPADEGVAGLFGRVAELVSGPLSRSPREDLLGQLSQILVPGIGDHLPDRYCAALG
1DT3	MGYP000225900132	175	122	7	63	231	11	177	1	1.725e-11	366	269	221	VTGFLALDNTNKLIVLSFRGSRSIENWIGNLNFDLKEINDICSGCRGHDGFTSSWRSVADTLRQKVEDAVREHPDYRVVFTGHSLGGALATVAGADLRGN---GYDIDVFSYGAPRVGNRAFAEFLT---VQTGGTLYRITHTNDIVPRLPPREFGYSHSSPEYWIKSGTLVPVT	AQAYIFY--TTDTIYVCFRGTSSTKDKLIDLQLTTTRF--LQEHVFVHKGFYDQYQSISKEIKHHIHNILAYYRQPNIVCRGHSLGGALATICSVDLKFSLCAPNNVSNVTFGSPRVGNKHFRNLYASLINHKNS--FRIADRNDPISYVPIL-YTYHHVDDAYCL-YDNCIKIK	1.352,-19.908,11.853,-1.509,-19.553,9.753,-2.686,-20.623,6.446,-1.388,-18.961,3.571,-3.545,-18.776,0.768,-2.665,-17.772,-2.606,-4.668,-15.824,-4.780,-3.613,-16.139,-8.325,-4.574,-13.248,-10.216,-2.536,-10.601,-11.634,-2.687,-9.546,-8.112,-1.335,-11.706,-5.374,-2.104,-11.465,-1.667,-1.198,-13.604,1.357,-3.220,-13.677,4.547,-1.484,-14.720,7.766,-2.990,-14.509,11.229,-2.218,-14.903,14.902,-4.683,-14…	VSQSRYLETDAQAYIFYTTDTIYVCFRGTSSTKDKLIDLQLTTTRFLQEHVFVHKGFYDQYQSISKEIKHHIHNILAYYRQPNIVCRGHSLGGALATICSVDLKFSLCAPNNVSNVTFGSPRVGNKHFRNLYASLINHKNSFRIADRNDPISYVPILYTYHHVDDAYCLYDNCIKIKKDKAWYKRLPHALQNLNYCNMFHEHSMVNYIELLAKQLGSAQLS
1DT3	MGYP000226226954	205	114	11	1	183	3	180	1	5.181e-07	186	269	186	EVSQDLFNQFNLFAQYSAAAYCGKNNDAPAGTNITCTGNACPEV--EKADATFLYSFEDSGVGD--VTGFLALDNTNKLIVLSFRGSRS---------IENWIGNLNFDLKEINDICSGCRGHDGFTSSWRSVADTLRQKVEDAVREHPDYRVVFTGHSLGGALATVAG---------ADLRGNGYDIDVFSYGAPRVGNRAFAE	RVPDSRLLYASRVA-YSIPVDGGGMPLPP------------AEYGLSDIET---FS----AGVDRINAALIASA--EEGLIVAFRGTLPPGGKDPLRILLDWLNDLNAALVP--GGDLPGRVHRGFLEALDSLWPLLRDRLVARAQAAPAAKLYVTGHSKGGAMSYLAGPRCLAYLRQAGVANP---VAVHTFAAARAGDQAFAD	-11.352,-15.907,8.752,-12.490,-15.720,5.334,-10.109,-14.541,2.748,-10.995,-11.415,0.886,-11.786,-12.288,-2.561,-8.971,-11.482,-4.899,-11.547,-9.644,-6.955,-12.170,-7.153,-4.157,-8.462,-6.442,-3.529,-8.017,-6.088,-7.335,-10.959,-3.720,-7.381,-9.578,-1.653,-4.426,-6.308,-1.435,-6.443,-8.313,-0.198,-9.464,-10.235,2.384,-7.324,-6.840,3.792,-6.165,-6.236,4.772,-9.913,-9.503,6.723,-9.894,-8.270,9.061,-…	MPRVPDSRLLYASRVAYSIPVDGGGMPLPPAEYGLSDIETFSAGVDRINAALIASAEEGLIVAFRGTLPPGGKDPLRILLDWLNDLNAALVPGGDLPGRVHRGFLEALDSLWPLLRDRLVARAQAAPAAKLYVTGHSKGGAMSYLAGPRCLAYLRQAGVANPVAVHTFAAARAGDQAFADGFKAEL
1DT3	MGYP000229651599	239	138	11	2	206	23	232	1	1.858e-06	197	269	279	VSQDLFNQFNLFAQYSAAAYCGKNNDAPAGTNITCTGNACPEVEK----ADATFLYSFEDSGVGDVTGFLALDNTNKLIVLSFRGSRSIEN-----WIGN-----------------------LNFDLKEINDICSGCRGHDGFTSSWRSVADTLRQKVEDAVREHPDYRVVFTGHSLGGALATVAGADL--RGNGYDIDVFSYGAPRVGNRAFAEFLTVQTGGTLYRITHTNDIVPRL	ASLQDLLWWHRLVDGSYER---------------CEADM-RALCDMTADD---VLASDFRVEILRPAYYIAKDDKQKRVFLVIRGTRSFHDVRRRWGLGVPCYHGGHSCRCHSHAPCVQVLTDVAAASEDM----LGGQAHRGMAHAARWFQEHVAGDLIDAHAKRPGYKLFVAGHSLGAGIAALLAMMLQHRVPDIQAV--CFAPPACVSSDLCERYAS--HITSV--ILDKDIVPRF	11.689,19.590,-30.708,7.897,20.161,-30.106,6.656,18.886,-26.863,3.264,18.861,-28.084,0.840,18.792,-25.284,0.353,15.268,-25.203,-3.259,15.632,-24.436,-3.159,12.505,-22.789,-6.729,11.826,-22.526,-5.786,11.297,-19.098,-8.276,8.849,-18.744,-7.747,9.966,-15.392,-9.972,7.502,-14.249,-11.433,10.312,-12.383,-12.542,8.254,-9.827,-13.805,11.632,-8.834,-14.056,10.070,-5.610,-13.325,13.156,-4.120,-15.684,12.…	MLCGPLTWPCMLWRCQLVRTCTASLQDLLWWHRLVDGSYERCEADMRALCDMTADDVLASDFRVEILRPAYYIAKDDKQKRVFLVIRGTRSFHDVRRRWGLGVPCYHGGHSCRCHSHAPCVQVLTDVAAASEDMLGGQAHRGMAHAARWFQEHVAGDLIDAHAKRPGYKLFVAGHSLGAGIAALLAMMLQHRVPDIQAVCFAPPACVSSDLCERYASHITSVILDKDIVPRFSLAAARKLSAELRGVDWKALLKDEFNRDVAALQKRIDAYASSVEAVS
1DT3	MGYP000232887710	287	169	12	1	268	27	279	1	2.67e-17	548	269	281	EVSQDLFNQFNLFAQYSAAAYCGKNNDAPAGTNITCTGNACP---EVEK-----ADATFLYSFEDSGVGDVTGFLALDNTNKLIVLSFRGSRSIENWIGNLNFDLKEINDICSGCRGHDGFTSSWRSVADTLRQKVEDAVREHPDYRVVFTGHSLGGALATVAGADLRG--NGYDIDVFSYGAPRVGNRAFAEFLTVQTGGTLYRITHTNDIVPRLPPREFGYSHSSPEYWIKSGTLVPVTRNDIVKIEGIDATGGNN---------QPNIPDIPAHLWYFGLIGTC	ETYDKAESKD--MVYYAGLAYCPKKC-------------LLAWDCESGKQFTNFGEVTH----VNNAITLASAYIGYEKKKNLIIVSYRGSANAQNWIEDFNFEMVSYPN-CKGCYMHAGFLEDYKAIEGKTEEAIEKLLKEHPGASIVTTGHSLGAALSVIAGLRLKAKFGSSKVIVHNFGCPRVGNHAMAQYISTRVDT-VFRVIHNKDLVAHLPFEYLDYRHPAFEVFWDE------KMTNYTVCN------ESGEDKECSDKFSPD-FSAGDHDFYFIPISSL	-45.934,-63.005,-4.540,-44.091,-59.870,-5.413,-43.159,-57.420,-2.790,-43.418,-53.765,-3.617,-40.400,-51.671,-2.783,-41.160,-48.754,-0.425,-40.310,-45.387,-1.675,-38.951,-43.414,1.117,-39.616,-39.797,0.276,-36.776,-37.885,1.544,-38.077,-34.389,1.937,-35.009,-32.294,1.503,-35.227,-29.189,3.507,-33.662,-26.394,1.509,-32.002,-24.175,4.052,-31.483,-20.915,2.309,-28.587,-19.480,4.101,-29.064,-15.878,3.…	MIKNPSYLLCLGLTLTLVSSFVVRSRETYDKAESKDMVYYAGLAYCPKKCLLAWDCESGKQFTNFGEVTHVNNAITLASAYIGYEKKKNLIIVSYRGSANAQNWIEDFNFEMVSYPNCKGCYMHAGFLEDYKAIEGKTEEAIEKLLKEHPGASIVTTGHSLGAALSVIAGLRLKAKFGSSKVIVHNFGCPRVGNHAMAQYISTRVDTVFRVIHNKDLVAHLPFEYLDYRHPAFEVFWDEKMTNYTVCNESGEDKECSDKFSPDFSAGDHDFYFIPISSLKC
1DT3	MGYP000237898142	185	113	5	1	184	15	185	1	1.09e-12	403	269	194	EVSQDLFNQFNLFAQYSAAAYCGKNNDAPAGTNITCTGNACPEVEKADATFLYSFEDSGVGDVTGFLALDNTNKLIVLSFRGSRSIENWIGNLNFDLKEINDICSGCRGHDGFTSSWRSVADTLRQKVEDAVREHPDYRVVFTGHSLGGALATVAGADLRGNGYDIDVF-SYGAPRVGNRAFAEF	SYSTPLALEL---GYLSGAAYEASSSI---------EAWTCSYCRHYNVTDVKVFS-NAIGGIQGFTAFSHTLNAIVVVFRGSNNIQNWILNIGSTRSSYS-LCAGCSVHTGFNGGYNLVASAVKAAVQNLKAKYRGSKLYITGHSLGGALATHAAAHLIKAGEKIQLLETYGSPRVGDKMFSKW	7.255,7.523,48.056,4.653,5.508,46.415,5.903,3.592,43.388,3.378,3.307,40.749,3.959,0.283,38.738,2.609,0.942,35.370,1.848,-2.253,33.695,2.536,-1.987,30.058,0.019,-4.218,28.457,1.156,-5.050,25.046,-1.575,-6.054,22.717,-1.415,-9.627,21.913,0.313,-10.181,18.711,-2.149,-10.885,16.066,-1.652,-14.336,14.999,-0.441,-14.605,11.432,-3.356,-15.694,9.256,-2.249,-17.798,6.236,-5.741,-17.361,4.515,-5.545,-13.52…	FLAILLLVIYPAATSYSTPLALELGYLSGAAYEASSSIEAWTCSYCRHYNVTDVKVFSNAIGGIQGFTAFSHTLNAIVVVFRGSNNIQNWILNIGSTRSSYSLCAGCSVHTGFNGGYNLVASAVKAAVQNLKAKYRGSKLYITGHSLGGALATHAAAHLIKAGEKIQLLETYGSPRVGDKMFSKWFQEIYPSTL
1DT3	MGYP000240536646	163	114	6	109	262	4	164	1	1.615e-05	163	269	178	GHDGFTSSWRSVADTLRQKVEDAVREHPDYRVVFTGHSLGGALATVAGADLRG-----NGYDI-DVFSYGAPRVGNRAFAEFLTV--QTG-GTLYRITHTNDIVPRLPPREFGYSHSSPEYWIKSGTLVPVTRNDIVKIEGIDATGGNNQPNIPDIPAHLWYF	AHAGFQGAYGGV-ESILKEKLQAE-SGRGLQIWVTGHSLGGALASLATTTIMGHIKTDSSYSLRGIYTYGMPRVGDTEYAEQIELGYETYDVRAMRFRNGDDIVTQVPWQWMGFRQTGHLMHLRGEGAFEFDPIEQDPGDTAENAGALADHSIPTYYARIAAF	-15.284,7.157,-6.924,-11.918,7.815,-8.161,-10.432,5.430,-10.772,-7.868,2.842,-9.882,-5.399,1.671,-12.656,-7.354,-0.748,-14.903,-4.563,-3.332,-14.922,-4.472,-3.434,-11.057,-8.340,-3.684,-10.952,-8.175,-6.503,-13.468,-5.537,-8.355,-11.377,-7.538,-7.662,-8.082,-10.771,-9.061,-9.632,-8.957,-12.480,-9.539,-8.635,-12.467,-5.771,-11.489,-10.223,-4.608,-14.028,-13.129,-4.489,-11.598,-15.207,-2.343,-11.03…	YGSAHAGFQGAYGGVESILKEKLQAESGRGLQIWVTGHSLGGALASLATTTIMGHIKTDSSYSLRGIYTYGMPRVGDTEYAEQIELGYETYDVRAMRFRNGDDIVTQVPWQWMGFRQTGHLMHLRGEGAFEFDPIEQDPGDTAENAGALADHSIPTYYARIAAFFTAPYQELGHRCTY
1DT3	MGYP000246414590	179	109	8	63	227	45	213	1	5.194e-09	266	269	261	VTGFLALDNTNKLIVLSFRGSRSIENWIGNLNFDLKEINDICSGCRGHDGFTSSWRSVADTLRQKVEDAVREHPD--YRVVFTGHSLGGALAT-----VAGADLRGNGYDIDVFSYGAPRVGNRAFAEFLTVQTGGTLYRITHTNDIVPRLPPREFGYSHSSPEYWI-------KSGTL	LLADIYAA--PGGLVITVRGTASFYDWAYNLSAQKQPSDYL--PGTIHAGFARAAMHITVPLRQWLQA--NGHADRQRNIWLSGHSLGGAVVTFLAPWLHSRGFCVN--GID--TYGSPRVGDGRYRRSWDLLFAGVSHRHVNSVDGVPMLPPLLLGYRHVAGLNYYNRQGRPTKYGVL	-13.432,-6.591,34.656,-15.553,-4.630,32.396,-14.147,-5.047,28.869,-14.598,-1.725,27.283,-15.171,-2.189,23.609,-12.143,-1.185,21.662,-12.516,1.759,19.522,-13.078,0.947,15.868,-10.993,2.391,13.057,-13.198,4.014,10.527,-11.553,3.169,7.202,-11.298,6.688,5.859,-8.311,7.588,3.640,-6.914,9.701,6.442,-7.301,6.943,9.022,-5.662,4.469,6.614,-2.733,6.876,6.188,-2.516,7.366,9.967,-2.575,3.586,10.376,0.264,3.2…	MTHHPQPLLCPTRQNLALAALHTYRGGLPPLAFPPPLGIIEAGSLLADIYAAPGGLVITVRGTASFYDWAYNLSAQKQPSDYLPGTIHAGFARAAMHITVPLRQWLQANGHADRQRNIWLSGHSLGGAVVTFLAPWLHSRGFCVNGIDTYGSPRVGDGRYRRSWDLLFAGVSHRHVNSVDGVPMLPPLLLGYRHVAGLNYYNRQGRPTKYGVLAGLIDKAIAAVRHIGKPGTAAINKHAMSCYAELLRDQNKVGESNGLGG
1DT3	MGYP000253530716	189	110	9	1	178	24	189	1	1.372e-10	327	269	190	EVSQDLFNQFNLFAQYSAAAYCGKNNDAPAGTNITCTGNA-----CPEVEKA----DATFLYSFEDSGVGDVTGFLALDNTNKLIVLSFRGSRSIENWIGNLNFDLKEINDICSGCRGHDGFTSSWRSVADTLRQKVEDAVREHPDYRVVFTGHSLGGALATVAGAD--LRGNGYDIDVFSYGAPRVGN	DYNAD---SSRRMRTYSLIAHCS--------------EDQIVNWECKLCSQTEQLEKV---QYIE-NKITQIMVYAGYMKSIDKVSFVFRGTIDAINWAEDFTFEQVAYKK-CTNCKVHEGFYLSYLSVADKVTAAVKTLRQLYPTKDIVFTGASLGGALATVGAIEIHLQVEKISE-LHTYGSPRTGN	-23.432,-43.881,-13.359,-26.130,-41.797,-11.878,-24.352,-41.368,-8.620,-21.199,-39.973,-9.902,-22.925,-37.156,-11.763,-24.769,-36.032,-8.716,-21.625,-35.891,-6.721,-19.939,-33.744,-9.245,-22.754,-31.291,-9.314,-22.822,-30.959,-5.514,-19.160,-30.339,-5.459,-19.307,-27.664,-8.081,-22.068,-25.957,-6.328,-20.144,-25.975,-3.165,-17.269,-24.519,-4.840,-19.286,-21.873,-6.400,-20.932,-21.112,-3.244,-17.9…	MVGLRLFIVILLLAIIKSRRSGIDYNADSSRRMRTYSLIAHCSEDQIVNWECKLCSQTEQLEKVQYIENKITQIMVYAGYMKSIDKVSFVFRGTIDAINWAEDFTFEQVAYKKCTNCKVHEGFYLSYLSVADKVTAAVKTLRQLYPTKDIVFTGASLGGALATVGAIEIHLQVEKISELHTYGSPRTGNL
1DT3	MGYP000261486223	257	153	12	1	251	19	248	1	1.241e-18	580	269	269	EVSQDLFNQFNLFAQYSAAAYCGKNNDAPAGTNITCTGNACPEVEKADATFLYSFEDSGV-GDVTGFLALDNTNKLIVLSFRGSRSIENWIGNLNFDLKEINDICSGCRGHDGFTSSWRSVADTLRQKVEDAVREHPDYRVVFTGHSLGGALATVAGADLR----GNGYDIDVFSYGAPRVGNRAFAEFLTVQTGG-TLYRITHTNDIVPRLPPREFGYSHSSPEYWIKSGTLVPVTRNDIVKIEGIDATGGNNQPN	SYSPAI---ALELGYLSGSAY-----EA----AVSIEAWNCSYCHKY--PFSDAKVFSNAVSGIQGYTGFSKGLNAVIVAFRGSNNIQNWILNIGTTKSTYS-LCSNCAVHTGFNSGYNAVAAAVRSAVQNLKAKYRNTRLIVTGHSLGGALAILCTADLKNFFGTVDL---TYTFGQPRVGNDAFSSW--YQSQHPNTYRLVDYADIVPHLPPSSFGFLHSSNQIWYQRGM------QSYTICE-PESPSCANSID	5.004,-48.614,32.203,2.491,-47.834,29.519,3.642,-45.424,26.979,0.953,-43.030,25.832,1.269,-42.212,22.280,0.441,-38.547,21.649,-1.349,-38.073,18.432,-0.433,-34.735,16.958,-3.296,-33.628,14.849,-1.907,-31.218,12.301,-4.794,-28.980,11.411,-4.081,-27.719,8.036,-5.730,-24.363,8.010,-6.138,-23.654,4.406,-6.057,-19.934,4.104,-8.734,-19.223,1.603,-7.216,-16.847,-0.833,-9.570,-13.926,-1.016,-10.513,-12.98…	MKSLALVTILLFIFSIKSSYSPAIALELGYLSGSAYEAAVSIEAWNCSYCHKYPFSDAKVFSNAVSGIQGYTGFSKGLNAVIVAFRGSNNIQNWILNIGTTKSTYSLCSNCAVHTGFNSGYNAVAAAVRSAVQNLKAKYRNTRLIVTGHSLGGALAILCTADLKNFFGTVDLTYTFGQPRVGNDAFSSWYQSQHPNTYRLVDYADIVPHLPPSSFGFLHSSNQIWYQRGMQSYTICEPESPSCANSIDRTSYSTDDHSLDNYIKLKAIQ
1DT3	MGYP000261687995	248	148	12	3	239	17	248	1	1.468e-14	435	269	284	SQDLFNQFNLFAQYSAAAYCGKNNDAPA--GTNITCTGN----ACPEVEKA-DATFLYSFEDSGVGDVTGFLALDNTNKLIVLSFRGSR--SIENWIGNLNFDLKEINDICSGCRGHDGFTSSWRSVADTLRQKVEDAVREHPDYRVVFTGHSLGGALATVAGADLRGNGYDI-DVFSYGAPRVGNRAFAEFLTVQTGGTLYRITHTNDIVPRLPPREFGYSHSSPEY-WIKSGTLVPVTRNDIVKIE	AQAYENNYNLDLAKRYVDFCGA-----AYCADPIFVKNKIDNWSCSVCKNYPGVTA-HVFH-GNVSDANGFVAYDPKANEIIISFSGTDPLSIANWIDDIDTLKEAY-PYCSGCQVHEGFYHAYRSVDSVVKSLLSSFLQSYPSASIAVTGHSLGAAMAAHCTAELTQKGYKIKASYTYGMPRVGDEAFEQW-YVQTVAGTYRVVHRKDPVPQLPLQSMGFHHMPYEVFYIED-------PSKYTVCN	17.604,-37.008,-8.822,17.618,-33.602,-10.034,14.596,-33.804,-12.111,12.181,-34.566,-9.407,13.083,-31.473,-7.471,12.354,-29.138,-10.252,8.904,-30.527,-10.782,7.994,-30.167,-7.148,9.037,-26.560,-7.122,6.967,-25.839,-10.166,3.892,-27.422,-8.689,4.202,-25.379,-5.583,4.350,-22.153,-7.576,1.340,-22.931,-9.673,-0.763,-23.758,-6.713,0.072,-20.518,-5.190,-0.969,-18.379,-8.069,-4.328,-19.896,-8.569,-5.074,…	MMALGALLLLAVQLFSAQAYENNYNLDLAKRYVDFCGAAYCADPIFVKNKIDNWSCSVCKNYPGVTAHVFHGNVSDANGFVAYDPKANEIIISFSGTDPLSIANWIDDIDTLKEAYPYCSGCQVHEGFYHAYRSVDSVVKSLLSSFLQSYPSASIAVTGHSLGAAMAAHCTAELTQKGYKIKASYTYGMPRVGDEAFEQWYVQTVAGTYRVVHRKDPVPQLPLQSMGFHHMPYEVFYIEDPSKYTVCNSSGEDKNCQDKYVADLDVSKLSSLILSSLSYVPHML
1DT3	MGYP000264407822	168	113	9	49	206	21	176	1	3.505e-07	210	269	265	ATFLYSFEDSGVGDVTGFLALDNTNKLIVLSFRGSRSIENWIGNL--NFDLKEINDICSGCRGHDGFTSSWRSVADTLRQKVEDAVREH--P-DYRVVFTGHSLGGALATVAG----ADLRGNGYDIDVFSYGAPRVGNRAFA-EFLTVQTGGTLYRITHTNDIVPRL	YKLIRHDSATEPGRVGHFIAVHHGKKQVVISIKGTSTLSDVFTDLVGKAVPHSIDN-CPEIRCHEGMYVA----AKMMLDDTLHLLQHMILPQDYKVIVCGHSLGAGVSCLLGIFLKQHLPDMPLQVY--AFATPACCSYEASLECRD-----YVTSVVNNNDCVPRM	1.365,-1.930,12.640,4.935,-2.472,13.872,4.143,-5.513,15.863,3.264,-7.475,12.799,7.004,-7.651,12.111,7.645,-9.877,15.014,8.109,-13.432,14.004,7.282,-14.856,17.392,3.644,-15.480,18.315,4.788,-15.363,21.924,6.301,-11.889,21.478,3.125,-10.549,19.801,0.975,-12.041,22.624,3.240,-10.540,25.260,2.985,-7.028,23.610,-0.843,-7.246,23.210,-1.616,-8.493,26.774,-0.975,-5.267,28.735,-3.273,-3.474,26.295,-6.143,…	AQWAYHPSVVTVQALLRPLGYKLIRHDSATEPGRVGHFIAVHHGKKQVVISIKGTSTLSDVFTDLVGKAVPHSIDNCPEIRCHEGMYVAAKMMLDDTLHLLQHMILPQDYKVIVCGHSLGAGVSCLLGIFLKQHLPDMPLQVYAFATPACCSYEASLECRDYVTSVVNNNDCVPRMSLVNVRLMHKLFLLIDTKLKEKGLSPNDFSSAKKYLADLMVIDANFLMSPDELNQWLEDEFQKDHDDPNLKELQLYVPGKVVSIWNHTK
1DT3	MGYP000268209944	144	93	9	66	205	15	135	0.99	0.03029	83	269	170	FLALDNTNKLIVLSFRGSRS-IENWIGNLNFDLKEINDI-CSGCRGHDGFTSSWRSVADTLRQKVEDAVREHPDYRVVFTGHSLGGALATVAGADLRGNGYDIDVFSYGAPR--VGNRAFAEFLTVQTGGTLYRITHTNDIVPR	SLWENDRG-EFTFSVRGSKLILRDIFKD-------IKIFFGSG---SQGD--------KDLEKSFARFKTEHPLKKPNVAMHSLGTELGFNAIDRTGLETNELY--AYNPGSSPLMKKEHIRKQLDRPNLNLFL--SANDLVSK	-2.214,2.743,20.696,-0.739,-0.656,21.185,-0.583,-2.524,17.975,-0.472,-6.269,17.724,0.600,-8.137,14.683,-1.615,-11.033,13.427,0.882,-13.625,11.994,-1.744,-15.603,10.100,-2.054,-12.830,7.589,1.679,-12.561,6.955,2.747,-12.483,3.418,6.006,-11.745,1.534,4.917,-8.083,1.195,2.163,-7.539,3.784,1.045,-7.979,7.367,-2.152,-7.334,9.285,-2.145,-5.399,12.565,-4.886,-4.856,15.238,-4.874,-2.066,17.854,-6.408,-2.…	DEWKRIPSYDTRYGSLWENDRGEFTFSVRGSKLILRDIFKDIKIFFGSGSQGDKDLEKSFARFKTEHPLKKPNVAMHSLGTELGFNAIDRTGLETNELYAYNPGSSPLMKKEHIRKQLDRPNLNLFLSANDLVSKYYKQNLEARDGDEVWYGKFYRSPVASHGISQWFED
1DT3	MGYP000270759671	150	106	5	63	210	9	148	1	7.487e-07	231	269	175	VTGFLALDNTNKLIVLSFRGSRSIENWIGNLNFDLKEINDICSGCRGHDGFTSSWRSVADTLRQKVEDAVREHPDYRVVFTGHSLGGALATVAGADLR--GNGYDIDVFSYGAPRVGNRAFAEFLTVQTGGTLYRITHTNDIVPRLPPRE	IEGVVFPLRLDSRIIVSIRGTQVELDVLRDLIIQPSRL----NGGLVHRGMRDQADDVITLLKPYIDSAFIQYPDYKLVLTGHSLGAGAAAIASLILQTSYPSIK--AYCYACPSCVSES---LLPRLSD-SVVSVLNMHDLVPRMNSSA	23.091,-21.205,-1.616,20.693,-18.444,-1.446,19.224,-18.639,1.867,15.797,-17.847,1.196,14.860,-15.513,3.727,11.337,-16.184,4.408,9.464,-13.168,3.798,8.979,-11.732,7.107,5.604,-10.544,6.972,5.363,-8.156,9.638,1.935,-7.157,10.352,0.792,-6.352,13.798,-2.760,-6.635,15.074,-3.799,-4.685,18.061,-7.162,-3.771,19.447,-7.488,-0.199,20.573,-10.140,0.314,23.138,-10.385,4.060,23.086,-11.863,4.230,19.746,-13.4…	MLSGSEPRIEGVVFPLRLDSRIIVSIRGTQVELDVLRDLIIQPSRLNGGLVHRGMRDQADDVITLLKPYIDSAFIQYPDYKLVLTGHSLGAGAAAIASLILQTSYPSIKAYCYACPSCVSESLLPRLSDSVVSVLNMHDLVPRMNSSAMHHLRESFDKVNWEEVIEVGVWRVCEV
1DT3	MGYP000274208487	250	144	11	5	227	13	241	1	4.743e-10	305	269	276	DLFNQFNLFAQYSAAAY--CGKNNDAPAGTNITCTGNACPEVEKADATF----------------LYSFEDSGVGDVTGFLALDNT-NKLIVLSFRGSRSIENWIGNLNFDLKEINDICSGCRGHDGFTSSWRS-----VADTLR--QKVEDAVREHP-DYRVVFTGHSLGGALATVAGADLRGNGYDIDVFSYGAPRVGNRAFAEFLTVQTGGTLYRITHTNDIVPRLPPREFGYSHSSPEYWIKSGTL	GRRRVWVEWGRMVQIAYQMYGTHKLSP------PTPKDFP---SG-WRHVANMTMVPHFFSYKEQEFAG----------FIAQSLLLPQHYAIVFRGTESPMDWLSDAEFMLETFHEVPDAGKTEKGFTDLYRSVTVTDIADNGAAAMPLRDFMHTWPEETAVTVTGHSLGAAVATLHALVAAYRFPNVTCVTFASPRVGNHAFAEAFASRN-IRHTRIFNHPDIVPKVPVELAGYLHVEPGYEISSLTS	-11.992,31.056,7.634,-12.330,31.705,4.001,-12.973,28.705,1.608,-9.220,28.684,0.693,-7.921,28.462,4.282,-10.406,25.604,4.939,-9.218,23.688,1.841,-5.536,24.212,2.863,-6.284,23.004,6.440,-8.123,19.908,5.106,-5.199,19.168,2.678,-2.700,19.563,5.580,-4.860,17.153,7.660,-4.974,14.548,4.809,-1.167,14.797,4.293,-0.534,14.183,8.057,-2.683,11.005,7.889,-0.733,9.841,4.781,2.621,10.570,6.566,1.432,8.349,9.477…	MDSQQQAKAEEHGRRRVWVEWGRMVQIAYQMYGTHKLSPPTPKDFPSGWRHVANMTMVPHFFSYKEQEFAGFIAQSLLLPQHYAIVFRGTESPMDWLSDAEFMLETFHEVPDAGKTEKGFTDLYRSVTVTDIADNGAAAMPLRDFMHTWPEETAVTVTGHSLGAAVATLHALVAAYRFPNVTCVTFASPRVGNHAFAEAFASRNIRHTRIFNHPDIVPKVPVELAGYLHVEPGYEISSLTSPIKHSVLCYHSLQTYLYVLGDPNANIGSCEQLPHT
1DT3	MGYP000279781781	264	161	10	1	240	1	230	1	2.013e-12	345	269	260	EVSQDLFNQFNLFAQYSAAAYCG-----------KNNDAPAGTNITCTGNACPEVEKADATFLYSFEDSGVGDVTGFL------ALDNTNKLIVLSFRGSRSIENWIGNLNFDLKEINDICSG-----CRGHDGFTSSWRSVADTLRQKVEDAVREHPDYRVVFTGHSLGGALATVAG--ADLRGNGYDIDVFSYGAPRVGNRAFAEFLTVQTGGTLYRITHTNDIVPRLPPREFGYSHSSPEYWIKSGTLVPVTRNDIVKIEG	MYTLDMTTIIKDCGELSKQVYSEPEKILKGWKKSGLLEVEPRIVLD---------EATDTES----------MVSVYSKKVDGLVYK----YIVVAVRGTESFTDVLKDLDVRKTQPTFVKKHYDHLRVKVHNGFYEQYQAIRPRIFNHIKRLQAKHNLSRVIFTGHSLGAAVASILALSYKMNHTGMNVSCVTFGSPRVGNKYFAKSFDIID--HSYRVVNYQDPVCKIPSR-WRFRHVKGVVLMKDKK--------VIYGER	-11.310,-18.513,9.203,-13.688,-16.216,7.631,-12.416,-13.376,5.671,-14.256,-10.444,4.484,-15.038,-10.733,0.889,-12.254,-9.303,-1.221,-14.545,-6.744,-2.906,-15.650,-5.272,0.468,-11.996,-5.022,1.682,-10.887,-3.361,-1.615,-13.790,-0.796,-1.487,-13.209,0.040,2.191,-9.394,0.347,1.665,-10.155,2.646,-1.327,-12.208,4.981,0.925,-9.496,4.840,3.638,-6.804,5.645,1.003,-8.892,8.623,-0.148,-9.513,9.991,3.365,-5…	MYTLDMTTIIKDCGELSKQVYSEPEKILKGWKKSGLLEVEPRIVLDEATDTESMVSVYSKKVDGLVYKYIVVAVRGTESFTDVLKDLDVRKTQPTFVKKHYDHLRVKVHNGFYEQYQAIRPRIFNHIKRLQAKHNLSRVIFTGHSLGAAVASILALSYKMNHTGMNVSCVTFGSPRVGNKYFAKSFDIIDHSYRVVNYQDPVCKIPSRWRFRHVKGVVLMKDKKVIYGERQSFFRSLWSGISLGSHRMDYYIYKMGYLFR
1DT3	MGYP000282608777	194	142	8	49	234	8	194	1	3.063e-10	325	269	203	ATFLYSFEDSGVGDVTGFLALDNTNKLIVLSFRGSRSIENWIGNLNFDLKEINDICSGCRGHDGFTSSWRSVA--DTLRQKVEDAVREHPDYRVVFTGHSLGGALATVAG---ADLRGNGYDIDVFSYGAPRVGNRAFAEFLTVQTGGTLYRITHTNDIVPRLPPREFGYSHSSPEYWIKSG---TLVPVTRND	GIIIEFIK-NDDTQLQACILLSKVTKHIIIIF-GNNSSEKWYNKYH-LFKTKLKNTYNVCVNTSIHHELTDKNSHLKMIELLSKLLLIHPEYNIQICGYGIGGSLATLFGYLIADEIHQ--NVTVVSFGSPRVGNYNWKQMFNFKRNLNHYRVVNKYDMITNRP--FIKYYHVGKKVQLQQPFSKLFVSNKTNH	-13.784,6.634,-0.799,-13.207,10.113,0.229,-16.642,10.976,1.114,-16.334,8.622,3.764,-13.547,10.055,5.495,-15.645,12.838,6.604,-17.162,10.538,9.004,-14.043,9.001,10.230,-12.718,9.281,13.806,-9.058,9.810,13.853,-7.687,7.270,16.271,-3.922,7.966,15.938,-1.315,9.963,13.998,2.010,8.161,13.622,5.047,10.179,12.593,8.667,9.023,12.353,11.163,11.801,11.697,14.163,9.440,11.015,12.312,7.468,8.320,9.886,10.249,…	LIENISHGIIIEFIKNDDTQLQACILLSKVTKHIIIIFGNNSSEKWYNKYHLFKTKLKNTYNVCVNTSIHHELTDKNSHLKMIELLSKLLLIHPEYNIQICGYGIGGSLATLFGYLIADEIHQNVTVVSFGSPRVGNYNWKQMFNFKRNLNHYRVVNKYDMITNRPFIKYYHVGKKVQLQQPFSKLFVSNKTNHSQNEYYQNI
1DT3	MGYP000290363133	156	113	4	58	206	5	156	1	1.642e-06	217	269	306	SGVGDVTGFLALDNTNKLIVLSFRGSRSIENWIGN--LNFDLKEI----NDICSG-CRGHDGFTSSWRSVADTLRQKVEDAVREHPDYRVVFTGHSLGGALATVAGADLRGNGYDIDVFSYGAPRVGNRAFAEFLTVQTGGTLYRITHTNDIVPRL	TWKYGQVFFLVRDRQRKALVLCVRGTWSAHDVLTDLCCTAEEYEVPSTTRRKQKGRNCAHHGMLEGAMAVAAEIEDIIETELKANPDYSLVLVGHSMGGGCVSLLATIWQTKFDRIKTFLFGGPCVAPMDS----QPTNNTAVVNVILEGDPFSCL	-4.438,-14.386,21.338,-4.538,-16.935,18.641,-1.314,-18.332,17.477,-0.071,-17.431,14.108,-1.336,-19.693,11.526,0.713,-20.072,8.449,-1.543,-21.177,5.877,-0.569,-19.443,2.675,1.756,-17.479,4.329,-0.302,-14.818,5.486,0.531,-14.068,9.107,-2.263,-12.555,11.132,-3.491,-12.212,14.735,-6.902,-11.346,16.311,-7.030,-9.309,19.561,-9.964,-8.285,21.776,-9.538,-4.647,22.979,-12.014,-4.546,25.984,-11.321,-0.819,…	MLPPTWKYGQVFFLVRDRQRKALVLCVRGTWSAHDVLTDLCCTAEEYEVPSTTRRKQKGRNCAHHGMLEGAMAVAAEIEDIIETELKANPDYSLVLVGHSMGGGCVSLLATIWQTKFDRIKTFLFGGPCVAPMDSQPTNNTAVVNVILEGDPFSCLSLGHIADISAAVARLCESPVLRRDILTIADGRVEEMTEEDLKFCWDTMETLRNEVMTNANKMFPAGRIFHISEAPEEKSGGASSYSASDAGKDEPQAAPSDDAKRIFIHEVSAGFFRDLAIGPRMFDISRHLPSLYEKTFRGLLEIEHKS
1DT3	MGYP000296571856	295	151	14	9	240	34	310	1	7.767e-12	339	269	351	QFNLFAQYSAAAYCGKNNDAPAGTN----------------------------ITCTGNACPEVE--KAD---ATFLYSFEDSGVGDVTGFLALDNTNKLIVLSFRGSRS--IENWIGNLNFDLKEINDICSGCRGHDGFTSSWRSVADTLRQKVEDAVREHPDYRVVFTGHSLGGALATVAGADLRGNGYDIDVFSYGAPRVGNRAFAEFLTVQTGGTLYRITHTNDIVPRLPP----------------------REF------GYSHSSPEYWIKSGTLVPVTRNDIVKIEG	TSWLMACFSELAYLRFNPLF--TNVKQKELIAKYLEEFAEKAKKPSLLKLLDVVGYDHEAETERLIAELDSLNAKLIKTF--DSNG-TQAILIS--TEKFITLAFRGTEATSIKDIKSDAKATTTKC---DSGGNIHSGFKSAFEEVAIEIQSILDQ--EEFANKPLFITGHSLGGALATIAAKKLTHSGGIASCYTFGSPRVGDEEWIS----NIKAPLYRIVNAADCVTMMPPGSDTISAISWLLGLIPRIGKSIRSFLLSKFGGYLHGGNMRYLTNCTGG--NYDSVNLLYS	-16.000,-19.351,2.112,-12.524,-19.602,3.256,-11.322,-16.924,5.616,-9.012,-14.379,4.047,-6.960,-13.370,7.033,-6.541,-16.925,8.545,-6.913,-19.966,6.377,-5.514,-22.684,8.798,-5.120,-23.364,12.552,-1.597,-21.835,12.772,-2.730,-18.605,11.081,-5.774,-18.493,13.473,-3.431,-18.937,16.496,-1.118,-16.110,15.196,-4.137,-13.773,14.530,-5.489,-14.466,18.050,-2.006,-13.889,19.573,-1.557,-10.573,17.673,-5.092,-…	MKNVIAQNALEIEMVNKLLTKEVPTYRQAYSDRTSWLMACFSELAYLRFNPLFTNVKQKELIAKYLEEFAEKAKKPSLLKLLDVVGYDHEAETERLIAELDSLNAKLIKTFDSNGTQAILISTEKFITLAFRGTEATSIKDIKSDAKATTTKCDSGGNIHSGFKSAFEEVAIEIQSILDQEEFANKPLFITGHSLGGALATIAAKKLTHSGGIASCYTFGSPRVGDEEWISNIKAPLYRIVNAADCVTMMPPGSDTISAISWLLGLIPRIGKSIRSFLLSKFGGYLHGGNMRYLTNCTGGNYDSVNLLYSVSFFYRIKMLYVKALPWSKPLADHSISLYRKKLAIVATNRN
1DT3	MGYP000297762842	156	89	8	110	258	2	146	1	2.044e-08	267	269	156	HDGFTSSWRSVADTLRQKVEDAVREHPDYRVVFTGHSLGGALATVAGAD---LRGNGYDIDVFSYGAPRVGNRAFAEFLTVQTGG-TLYRITHTNDIVPRLPPR-EFGYSHSSPEYWIKSGTLVPVTRNDIVKIEGIDATGGNN--QPNIPDIPAH	HQGFYNAFLGVEAYIRTEVQKLMALYRDAKLVSTGYSLGSALSTFACLDFHNLFGRCDEHY--TYGEPRVGNENFAMF--VQTSVPERYRVIHYADIVPHIPPQLPISYAHFSYEIWYDKTMKT------YKQCG-AEEFKCSKSLFPTSWSTSDH	1.431,-11.650,-4.901,5.047,-10.722,-3.851,5.959,-13.817,-1.804,8.521,-11.990,0.431,5.972,-9.265,1.456,3.319,-11.971,2.071,5.748,-14.015,4.222,6.537,-10.822,6.220,2.706,-10.281,6.744,2.214,-13.977,7.855,4.892,-13.310,10.511,2.655,-10.692,12.202,-0.815,-11.712,10.907,-1.954,-13.671,14.062,-0.965,-10.736,16.309,-2.697,-8.106,14.145,-5.911,-10.283,13.965,-6.053,-10.773,17.713,-5.612,-6.993,18.452,-8.…	MHQGFYNAFLGVEAYIRTEVQKLMALYRDAKLVSTGYSLGSALSTFACLDFHNLFGRCDEHYTYGEPRVGNENFAMFVQTSVPERYRVIHYADIVPHIPPQLPISYAHFSYEIWYDKTMKTYKQCGAEEFKCSKSLFPTSWSTSDHDISNYLKIGQ
1DT3	MGYP000305104980	246	137	12	2	237	1	203	1	8.231e-10	279	269	205	VSQDLFNQFNLFAQYSAAAYCGKNNDAPAGTNITCTGNACPEVEKADATFLYSFEDSGVGDVT-----G-FLALDNTNKLIVLSFRGSRS--IENWIGNLNFDLKEINDICSGCRGHDGFTSSWRSVADTLRQKVEDAVREHPDYRVVFTGHSLGGALATVAGADLRGNGYDIDVFSYGAPRVGNRAFAE--FLTVQTGGTLYRITHTNDIVPRLPPREFGYSHSSPEYWIKSGTLVPVTRNDIVK	MTPQTF---LLLAESSSQAYSEP--------------DMFSKWFE----------KVGSGSPDFIEKAGTQAYCFETDVDRVLVFRGTEPEQLRDWRADANLNKLSMQE---GGCVHEGFSRALDQVWNP----TEKWLSTAGAKKLWITGHSLGGALALLAGARLNGIEANVC--TYGQPRVGDQLFAMQAEKKLGSR--YCRFVHNRDIVARIPLYTIGFRHFGRSFISRMGSRRR-----LIL	-3.457,1.015,16.298,-4.056,-2.017,18.650,-1.717,-5.170,18.635,-4.705,-7.110,17.128,-5.187,-4.526,14.264,-1.403,-4.583,13.616,-1.392,-8.394,13.352,-4.549,-8.371,11.163,-2.962,-5.832,8.715,0.405,-7.745,8.621,-1.325,-11.141,8.012,-3.689,-9.617,5.411,-0.665,-8.108,3.564,0.948,-11.561,3.574,-2.257,-13.432,2.639,-2.752,-11.080,-0.370,-0.123,-13.242,-2.167,-2.319,-16.365,-1.844,-4.936,-17.435,-4.388,-8.…	MTPQTFLLLAESSSQAYSEPDMFSKWFEKVGSGSPDFIEKAGTQAYCFETDVDRVLVFRGTEPEQLRDWRADANLNKLSMQEGGCVHEGFSRALDQVWNPTEKWLSTAGAKKLWITGHSLGGALALLAGARLNGIEANVCTYGQPRVGDQLFAMQAEKKLGSRYCRFVHNRDIVARIPLYTIGFRHFGRSFISRMGSRRRLILGW
1DT3	MGYP000306326861	157	89	7	84	219	20	169	1	1.518e-05	162	269	196	RSIENWIG------NLNFDLKEINDICS-----GCRGHDGFTSSWRSVADTLRQKVEDAVREHPDYRVVFTGHSLGGALATVAGADLRGNGYDIDVFSYGAPRVGNRAFAEFLTVQTGGTLYRITHTNDIVPR-----LPPREF-----GYSHSSPE	HSQNDLFKTLKYVPNLVFN-NNLLSTHKLKKNKNILIHSGFLD----VYNNIRDKILKELNNIKPKYLIISGHSLGASIATIAALDLSLLGFNIVTYSFASPRVGNTEFSNLVNK--STNLYRIVNTCDIIPDGWLSVTPNFEDYKKPYIFTHTGII	-0.836,-14.126,29.915,0.064,-15.106,26.553,-1.332,-12.689,24.305,-2.183,-14.621,21.439,-1.987,-12.065,19.134,-3.737,-13.383,16.292,-1.695,-11.703,13.966,-2.978,-12.072,10.632,-0.642,-11.627,7.884,-2.443,-10.659,4.897,0.498,-11.274,2.968,-0.482,-14.742,2.999,-3.293,-14.152,0.963,-1.278,-13.201,-1.776,1.056,-15.923,-1.997,-1.536,-18.064,-3.096,-2.350,-16.226,-5.974,0.125,-17.146,-8.381,0.278,-14.00…	MTYNENRYNITKIYKNNKIHSQNDLFKTLKYVPNLVFNNNLLSTHKLKKNKNILIHSGFLDVYNNIRDKILKELNNIKPKYLIISGHSLGASIATIAALDLSLLGFNIVTYSFASPRVGNTEFSNLVNKSTNLYRIVNTCDIIPDGWLSVTPNFEDYKKPYIFTHTGIIKTFTSNWKSLIHNHAIENYSENINNYK
1DT3	MGYP000309550220	181	98	8	3	174	24	184	1	4.743e-10	320	269	184	SQDLFNQFNLFAQYSAAAYCGKNNDAPAGTNITCTGNACPEV---EKADATFLYSFEDSGVGDVTGFLALDNTNKLIVLSFRGSRSIENWIGNLNFDLKEI-NDI-CSGCRGHDGFTSSWRSVADTLRQKVEDAVREHPDYRVVFTGHSLGGALATVAGADL-RGNGYD---IDVFSYGAP	DPYLGNA---TLYYCEAAYC---------------GDYMTRVYNQEATGFQPVYEF--DGKDETKGFLGYNDADKNIWLVYRGSADIANWATNLKALLISCPDSWNLDSCKVHKGFIHAVQDVIEGIWSQLSALMNKYPTYKVVITGHSLGAALATVTATELVTARGVDKNMVQLWHYGSP	28.494,-10.876,-1.186,26.237,-11.344,1.543,24.021,-8.497,1.688,20.950,-9.609,0.163,19.350,-11.048,2.844,18.178,-8.859,5.206,15.178,-7.524,3.915,13.385,-10.565,4.372,13.645,-10.848,7.956,11.551,-8.199,8.922,8.701,-9.591,7.451,8.985,-12.248,9.883,8.465,-10.471,12.836,5.239,-9.334,11.819,4.193,-12.824,11.524,3.659,-14.457,14.496,0.374,-13.652,14.815,-1.050,-13.224,11.672,-0.818,-16.042,9.859,-3.752,…	MWHIFLVALLLVQLGASYAGSFDDPYLGNATLYYCEAAYCGDYMTRVYNQEATGFQPVYEFDGKDETKGFLGYNDADKNIWLVYRGSADIANWATNLKALLISCPDSWNLDSCKVHKGFIHAVQDVIEGIWSQLSALMNKYPTYKVVITGHSLGAALATVTATELVTARGVDKNMVQLWHYGSP
1DT3	MGYP000311687744	170	106	6	77	225	2	170	1	4.488e-07	222	269	170	VLSFRGSRSIENW--IGN-------L-NFDLKEIN------DICSGCRGHDGFTSSWRSVADTLRQKVEDAVREHPDYRVVFTGHSLGGALATVAGAD-----LRGNGYDIDVFSYGAPRVGNRAFAEFLTVQTGGTLYRITHTNDIVPRLPPREFGYSHSSPEYWIKSG	RMVFKAAKSIDPIQDYGKTINSYDTIEDIGMVIPHANKEGCEAWSDQRVHSGFMRAYYQIEEQAIADLKDVLNIHPKHTVVGTAHSLGSAILRVMRLDAVYKGLFENREAPALYTYGAHRMGNQKFCNALIDYLP-NITRVVNGVDLVARLPLPIIGYRHETKQQYIGKR	-8.695,-15.661,13.778,-6.779,-14.386,11.035,-7.590,-13.940,7.489,-5.191,-13.517,4.752,-6.044,-11.527,1.921,-3.837,-12.222,-0.857,-3.769,-9.204,-2.793,-3.473,-9.809,-6.284,-2.346,-12.833,-7.713,0.358,-10.972,-8.912,-0.952,-9.918,-11.973,1.777,-11.668,-13.498,3.224,-8.398,-13.517,5.322,-9.457,-16.193,3.148,-9.586,-18.923,1.950,-6.283,-18.984,4.382,-4.280,-17.268,6.846,-4.781,-19.870,5.009,-2.372,-2…	NRMVFKAAKSIDPIQDYGKTINSYDTIEDIGMVIPHANKEGCEAWSDQRVHSGFMRAYYQIEEQAIADLKDVLNIHPKHTVVGTAHSLGSAILRVMRLDAVYKGLFENREAPALYTYGAHRMGNQKFCNALIDYLPNITRVVNGVDLVARLPLPIIGYRHETKQQYIGKR
1DT3	MGYP000313845366	283	152	13	3	211	175	452	1	1.386e-08	258	269	606	SQD---LFNQFNLFAQYSAAAY-----------CGKNN----DAPAGTNIT---CTGN-------------------------ACPEVEKA-DATFLYSFEDSGVGDVTGFLALDNTNKLIVLSFRGSRSIENWIGNLNFDLKEINDI-------CSGCRGHDGFTSSWRSVADTLR--------------QKVEDAVR----EHPDYRVVFTGHSLGGALATVAGADLRGNGY-DIDVFSYGAPR-VGNRAFAEFLTVQTGGTLYRITHTNDIVPRLPPREF	SQDELQALLEFQQIFQFAIGAYGWMLHVYENPCCNAPGIFCPHVNPMSWICCCCCWPQQMWSKNDPVSCWRYPCAKMNILNERGMRRQTRVHGADILYQTFRNSVILTPFSIVADHRGKRVIIAFRGTLSIADLLKDAMAETMPLDDLGREFHFDGNGTFAHKGFMLSAEAAVRHLIELKLLPHIFGLNAGQGSERWAHLSHGACQDYQLVITGHSLGASVAACASLLLR-NSYPTLKCVIFSPPGPTFSKVLALQSRE----WCKAMFLGADVVVRLDPANV	-10.957,25.447,-38.109,-10.848,22.537,-35.693,-7.416,21.310,-35.861,-7.465,17.583,-35.935,-6.756,16.466,-32.604,-3.960,14.397,-33.424,-5.356,11.110,-32.952,-3.743,9.602,-30.251,-1.294,7.524,-31.883,-3.311,4.588,-32.605,-3.379,2.418,-29.834,-1.344,-0.021,-31.296,-2.480,-2.943,-29.522,0.869,-3.884,-28.896,0.062,-7.262,-28.349,-0.202,-8.482,-31.731,3.058,-8.585,-33.084,4.507,-11.822,-32.115,7.427,-1…	RSEPIAQPRAQMNPLSDHTAAGSTAQLMDDEKRYERCCRLLCCLFSGKSSPRLDPYAAFARLFAHFVTGWNFTVTDTSLAFSLAASDQRLHTHNKIADMLSTYDGEVPMPIHRELAKSEIGRTLVAAAEYYLRNGSRDLEAKRKVTAEDVRLLEKAASMRLTHQLGSPQNARCASQDELQALLEFQQIFQFAIGAYGWMLHVYENPCCNAPGIFCPHVNPMSWICCCCCWPQQMWSKNDPVSCWRYPCAKMNILNERGMRRQTRVHGADILYQTFRNSVILTPFSIVADHRGKRVIIAFRGTLSIADLLKDAMAETMPLDDLGREFHFDGNGTFAHKGFMLSAEAAVRHLIELKLLPHIFGLNAGQGSERWAHLSHGACQDYQLVITGHSLGASVAACA…
1DT3	MGYP000324210099	199	122	9	63	246	5	192	1	3.489e-10	328	269	193	VTGFLALDNTNKLIVLSFRGSRSIENWI--GNLNFDLKE-INDI----CSGCRGHDGFTSSWRSVADTLRQKVEDAVREHPDYRVVFTGHSLGGALATVAGADLRGNGYD--I-DVFSYGAPRVGNRAFAE-----FLTVQTGGTLYRITHTNDIVPRLPPREFGYSHSSPEYWIKSGTLVPVTRNDIVKIEGIDATGG	QRAAIFHSKSLG-IAVAFEGTEILSILSILHDVDFWPVDPTNALKDAVPAGTKLFKGFHSAYQNVAKPVFKNLKRIISERNETRVTVTGHSLGAAMALLAAAHYEQTLKDGSVANVFTFGQPRTGNHAFANAMDDKFLG-----KLFYVVNGQDWVPHMPPRDWNFQHPSGQVWIN-----PPNSQNWTFFPGQEDSNG	9.419,19.874,2.752,7.153,18.264,5.055,4.786,16.515,2.920,1.553,16.927,4.691,0.445,13.474,4.596,-3.173,12.809,5.265,-5.337,9.883,6.064,-9.039,9.524,6.647,-10.855,6.822,8.657,-14.444,6.040,7.688,-16.873,3.597,9.398,-19.887,2.005,7.855,-22.016,-0.809,9.390,-22.149,-2.598,6.014,-18.526,-2.089,4.911,-16.604,-2.010,8.211,-13.759,0.461,8.770,-12.036,2.059,5.751,-8.615,3.741,6.082,-7.854,5.985,3.068,-4.3…	GNINQRAAIFHSKSLGIAVAFEGTEILSILSILHDVDFWPVDPTNALKDAVPAGTKLFKGFHSAYQNVAKPVFKNLKRIISERNETRVTVTGHSLGAAMALLAAAHYEQTLKDGSVANVFTFGQPRTGNHAFANAMDDKFLGKLFYVVNGQDWVPHMPPRDWNFQHPSGQVWINPPNSQNWTFFPGQEDSNGA
1DT3	MGYP000329501520	209	118	10	8	203	4	185	1	7.042e-07	196	269	185	NQFNLFAQYSAAAYCGKNNDAPAGTNITCTGNACPEVEKADATFLYSFEDSGV------GDVTGFLALDNTNKLIVLSFRGSRSIENWIGNLNFDLKEINDICSG------CRGHDGFTSSWRSVADTLRQKVEDAVREHPDYRVVFTGHSLGGALATVAGADLRGNGYDIDVFSYGAPRVGNRAFAE-FLTVQTGGTLYRITHTNDIV	IQYVDIIEIAYTAY--KD----------SVEKA-KELLSS------YELMGFLYTNSLDGDVFGFV--ANKDDICYIVFRGTMGLDEWINNFNAIPILYPYVRQSWYWFRKTRVEPGFWLVYESFRDALINFV----KLSGNSKVRILGHSLGGAITSYTALDVEGLIPDLQVYSYASPRPGNKQFGKLFNKMIKSSFR--IENTQDIV	1.344,-13.392,15.082,-0.237,-11.045,12.822,2.891,-10.251,10.873,3.127,-13.860,9.537,-0.588,-13.979,8.655,-0.201,-10.770,6.722,2.496,-12.347,4.509,-0.127,-14.916,3.406,-2.527,-12.103,2.568,0.190,-10.264,0.597,0.815,-13.486,-1.431,-2.787,-13.280,-2.621,-1.908,-9.966,-4.370,0.985,-11.726,-6.130,-1.425,-14.590,-7.134,-3.802,-12.013,-8.686,-0.929,-10.771,-10.854,0.884,-14.068,-11.741,-1.970,-16.382,-1…	SHAIQYVDIIEIAYTAYKDSVEKAKELLSSYELMGFLYTNSLDGDVFGFVANKDDICYIVFRGTMGLDEWINNFNAIPILYPYVRQSWYWFRKTRVEPGFWLVYESFRDALINFVKLSGNSKVRILGHSLGGAITSYTALDVEGLIPDLQVYSYASPRPGNKQFGKLFNKMIKSSFRIENTQDIV
1DT3	MGYP000343523766	259	153	15	9	237	46	281	1	4.471e-12	361	269	334	QFNLFAQYSAAAYCGKNNDAPAGTNITCTGNACP--EVEKADATFLYSFEDSG---VGDVTGFLALDNTNKLIVLSFRGSRSIENWIGNLN--FDLKEINDI--CSG-------------------CRGHDGFTSSWRSVADTLRQKVEDAVREHPDYRVVFTGHSLGGALATVAGADLRGNGYDIDVFSYGAPRVGNRAFAEFLTVQTGG-TLYRITHTNDIVPRLPPREFGYSHSS-PEYWIKSGTLVPVTRNDIVK	KAAWAADASMLAY--ARY----GKNPMPPGDFSDNLARGG--LSYRKE---IGDWKVPGTQAYFATN--DQFAFLAFRGTEVDDDVDKFDDGDLILVNEPDYRPAPGNPGPALGHLSLIEHLFSAPCLVHRGFQRALDQVWDEVHSCVTAYRGAHPQAEICFTGHSLGAALAVLAFSRFADPG--NSLITFGCPRVGDQPFRDRV-LSNEGKGIFRYVNLNDPVAHIPLESYLYRHAPQECLRFDE-------EGNICP	18.648,18.024,-24.593,15.272,18.227,-22.851,13.367,15.307,-24.022,10.042,16.793,-24.564,7.857,15.143,-22.169,5.745,13.375,-24.553,2.681,14.712,-23.200,0.018,12.810,-24.590,0.852,10.313,-26.859,-2.064,8.296,-26.325,-0.819,5.286,-25.052,-2.491,2.718,-27.069,-5.723,2.195,-25.748,-4.496,-1.198,-25.066,-2.051,0.053,-22.775,-4.296,2.336,-21.201,-6.111,-0.469,-20.006,-3.210,-2.037,-18.603,-2.558,0.423,-…	MIVPVLRNTLLPASLKNLFFPPEKEEYTYFERASTHPFVTGTSIVKAAWAADASMLAYARYGKNPMPPGDFSDNLARGGLSYRKEIGDWKVPGTQAYFATNDQFAFLAFRGTEVDDDVDKFDDGDLILVNEPDYRPAPGNPGPALGHLSLIEHLFSAPCLVHRGFQRALDQVWDEVHSCVTAYRGAHPQAEICFTGHSLGAALAVLAFSRFADPGNSLITFGCPRVGDQPFRDRVLSNEGKGIFRYVNLNDPVAHIPLESYLYRHAPQECLRFDEEGNICPDNGAFQADAAALGVAIGGLHWNLDSDLSKVQAPAGVVDHSPARYCIRLWNCVS
1DT3	MGYP000347122215	239	141	12	9	240	21	230	1	6.274e-13	405	269	276	QFNLFAQYSAAAYCGKNNDAPAGTNITCTGNACPEVEKADATFLYSFEDSGVGDVTGFLALDNTNKLIVLSFRGSR-SIENWIGNLNFDLKEINDICSGCRGHDGFTSSWRSVADTLRQKVEDAVREHPDYRVVFTGHSLGGALATVAGADLRGNG-----YDIDVFSYGAPRVGNRAFA-EFLTVQTGGTLYRITHTNDIVPRLPPREFGYSHSSPEYWIKSGTLVPVTRNDIVKIEG	RAYWLAEFADHAY------------ETNSFALEQWLKQNGFTLVLPV--DKNG-TQGFLAQA--EGAAVLAFRGTEKKLEDWVTDAKFGWDKNPEPVAPGRIHVGFADALRSVLGDLDVPIRK-LKDHR-VLLHFTGHSLGAALATLAAVHYGKDSSACPIRS--VHTFGSPRVGDAEFAGEFDKLFGG-RAYRFVNNEDLVTRVPARAQDYKHVNELVYIDD-------RGQLQRDIG	-8.285,8.667,24.400,-7.129,5.104,24.029,-6.209,3.874,20.497,-9.048,1.779,19.189,-8.220,-1.863,18.616,-7.264,-2.864,15.100,-10.730,-4.432,14.570,-12.537,-1.328,15.962,-10.426,1.036,13.789,-10.915,-1.047,10.590,-14.685,-1.584,11.106,-15.377,2.161,11.734,-17.896,3.432,9.118,-16.176,6.693,8.319,-15.060,7.209,4.798,-12.773,10.014,5.785,-9.141,9.684,6.777,-9.086,8.056,10.239,-5.628,8.305,11.801,-6.177,…	VPLPSAVEALTNPTTKLDVARAYWLAEFADHAYETNSFALEQWLKQNGFTLVLPVDKNGTQGFLAQAEGAAVLAFRGTEKKLEDWVTDAKFGWDKNPEPVAPGRIHVGFADALRSVLGDLDVPIRKLKDHRVLLHFTGHSLGAALATLAAVHYGKDSSACPIRSVHTFGSPRVGDAEFAGEFDKLFGGRAYRFVNNEDLVTRVPARAQDYKHVNELVYIDDRGQLQRDIGYWFRFLNFVTNAVGDLKEAVKTTVKDHSMKLYCGHLLKAAGKTSNP
1DT3	MGYP000355821289	236	152	12	1	211	51	271	1	4.884e-09	244	269	396	EVSQD--LFNQFNLFAQYSAAAYCGKNN-----DAPAGTNITCTGNACPEVEKA------DATFLYSFEDSGVGDVTGFLALDNTNKLIVLSFRGSRSIENWIGN-----LNF-DLKEINDICSG----CRGHDGFTSSWRSVADTLRQKVEDAVREHPDYRVVFTGHSLGGALATVAGADLRGNGYDIDVFSYGAPRVGNRAFAEFLTVQTGGTLYRITHT--NDIVPRLPPREF	PVAQDRKLLENLAYYVVYANVAYGWKMDLAFLRRL----HLGGDLQALLRRTGTREEDVIAA-EWESRTHRP----GYFIVRDQSKEKIVLCVRGTWTPHDILTDLGCTAEDFEVRSPTKYLWNTSSKRLRAHHGMLESARALLRVVEPILGKELESNPNFSLVLVGHSMGGGVAALLGTLLKNTFPNLVVYAYGAPCVAPIDTRP--TGDANI----ISIINEGDPFCCLSLGHV	15.892,-12.355,-5.183,16.320,-14.987,-7.770,12.675,-15.384,-8.109,12.054,-11.795,-8.504,14.515,-12.047,-11.218,12.789,-14.986,-12.753,9.472,-13.321,-12.730,11.044,-10.248,-14.043,12.606,-12.348,-16.659,9.304,-13.948,-17.564,8.050,-10.576,-18.172,10.917,-9.877,-20.424,12.282,-7.113,-18.279,15.691,-8.715,-17.979,15.786,-9.620,-21.623,15.346,-5.963,-22.442,18.665,-5.262,-20.857,20.761,-8.050,-22.502…	IRMIVTNVEEHGVVDSFKKYPNQDVWASFYALSRLQRAAIFHDRLYQQSFPVAQDRKLLENLAYYVVYANVAYGWKMDLAFLRRLHLGGDLQALLRRTGTREEDVIAAEWESRTHRPGYFIVRDQSKEKIVLCVRGTWTPHDILTDLGCTAEDFEVRSPTKYLWNTSSKRLRAHHGMLESARALLRVVEPILGKELESNPNFSLVLVGHSMGGGVAALLGTLLKNTFPNLVVYAYGAPCVAPIDTRPTGDANIISIINEGDPFCCLSLGHVADLSVGLSHLCEDSELRTDILIHTEGRIDEMDRCDLEWCSKTLQTLREHMAAEKLFPPGRILLLAKSSNDQEDEFLLPRLLHVQAQQFRDLAISPRMFDLTRHVPSLYESSLKGILVRSKTVTDN
1DT3	MGYP000356728995	239	130	10	1	227	12	191	1	3.585e-07	216	269	231	EVSQDLFNQFNLFAQYSAAAYCGKNNDAPAGTNITCTGNACPEVEKADATFLYSFEDSGVGDVTGFLALDNTNKLIVLSFRGSRSIENWIGNL-NFDLKEINDICSGCRGHDGFTSSWRSVADTLRQKVEDAVREHPDYRVVFTGHSLGGALATVAGADL------RGNGYDIDVFSYGAPRVGNRAFAEFLTVQTGGTLYRITHTNDIVPRLPPREFGYS-----HSSPEYWIKSGTL	NLSKKSIDRHRFAANLCKQVYNTKSG--------------------------------------ILIKK--YKNHTYISLEGSYTIFHWIYNFCVFK--------SND-IHTGFYNNTKKYIEAYR--LKELIETN--DNVILCGHSLGAAAALLISHQLKETRNIK------EIVIFGCPMISGQDFKREFQEKNNINIFSYQNGTDIICSLPFSFFGYVPLIDDVFHLESVSDKDGL	11.820,-20.429,-10.638,10.812,-18.695,-7.643,8.413,-20.712,-5.745,6.381,-18.152,-4.270,5.127,-19.628,-1.248,1.783,-18.444,-1.508,0.074,-18.394,1.566,-3.376,-18.785,0.764,-5.544,-16.316,2.720,-4.653,-15.273,6.052,-6.171,-18.020,7.834,-4.165,-17.240,10.665,-5.287,-13.740,11.165,-7.571,-13.009,14.076,-11.092,-11.761,13.252,-9.890,-8.437,14.700,-7.004,-8.256,12.235,-9.267,-9.092,9.320,-11.692,-6.289,…	MYQILCKKYPYNLSKKSIDRHRFAANLCKQVYNTKSGILIKKYKNHTYISLEGSYTIFHWIYNFCVFKSNDIHTGFYNNTKKYIEAYRLKELIETNDNVILCGHSLGAAAALLISHQLKETRNIKEIVIFGCPMISGQDFKREFQEKNNINIFSYQNGTDIICSLPFSFFGYVPLIDDVFHLESVSDKDGLVKSIYDHSMLSYVLSLSFPLESKWEEKIDEIFNFNEENTI
1DT3	MGYP000362613103	218	131	9	16	225	4	180	1	2.01e-07	212	269	203	YSAAAYCGKN----NDAPAGTNITCTGNACPEVEKADATFLYSFEDSGVGDVTGFLALDNTNKLIVLSFRGSR-SIENWIGNLNFDLKEINDICSGCRGHDGFTSSWRSVADTLRQKVEDAVREHPDYRVVFTGHSLGGALATVAGADLRGNGYDI-DVFSYGAPRVGNRAFAEFLTVQTGGTLYRITHTNDIVPRLPPREFGYSHSSPEY--WIKSG	KQLAALCEDSYSGTPDFSKNG----------------VDVFMTRQAD----------------CVIFAIRGTQLNLIDLVRNLVWWPRSL----GGIDAHAGYADGWQGIEDWIDIARRDLGIKDRIKPVLLTGHSAGGAIALIGAAEFLRKGWPIVECVTFGAPRTISDDMIN----DMGFITTQYVHARDPIPSW-LGHTDYKHVRKVYVGGSESS	-3.719,0.503,16.044,-1.122,3.246,15.845,1.188,3.787,12.760,4.087,2.050,14.611,1.916,-1.100,14.983,1.002,-0.855,11.250,4.731,-0.659,10.359,5.334,-3.763,12.573,2.478,-5.572,10.811,4.144,-4.726,7.455,7.459,-6.127,8.778,5.735,-9.368,10.103,4.310,-9.781,6.554,7.851,-10.506,5.252,8.442,-13.392,7.701,4.921,-14.654,8.261,2.527,-16.944,6.408,0.034,-14.777,4.516,-3.650,-15.225,4.964,-3.789,-14.936,1.191,-1…	MNHKQLAALCEDSYSGTPDFSKNGVDVFMTRQADCVIFAIRGTQLNLIDLVRNLVWWPRSLGGIDAHAGYADGWQGIEDWIDIARRDLGIKDRIKPVLLTGHSAGGAIALIGAAEFLRKGWPIVECVTFGAPRTISDDMINDMGFITTQYVHARDPIPSWLGHTDYKHVRKVYVGGSESSPWWKKSLDCHGIDLYKKLTGERE
1DT3	MGYP000364908578	164	91	5	76	207	31	191	1	2.896e-08	238	269	254	IVLSFRGSRSIENWIG----------------NLNFDLKEINDICSGCRGHDGFTSSW----RSVADTLRQKVEDAVREHPD-----YRVVFTGHSLGGALATVA-------GADLRGNGYDIDVFSYGAPRVGNRAFAEFLTVQTGGTLYRITHTNDIVPRLP	VVVVWRGTQTTEEWLKEIDGSIIEPDHDKVGALVSGLHFHVTDLDGDVGIERGFWTLYASGQNSARVQVTDEIRRLVSVYGGGQQGELSITITGHSLGAALALVSAYDVASLGLN---SSAPISVISFAGPRVGNAAFKRRLHDELNVHVLRVVNSRDIVPKVP	15.188,30.617,9.684,13.323,27.635,10.926,11.981,25.806,7.952,8.391,25.231,8.725,8.042,21.651,8.458,5.446,21.123,5.978,2.958,19.187,7.816,2.684,16.128,6.002,-0.741,16.069,4.901,-2.112,12.750,5.084,-3.871,12.142,1.941,-6.328,9.436,2.756,-9.448,8.381,4.701,-10.487,5.738,7.201,-14.026,4.447,7.063,-15.974,1.782,9.040,-18.939,-0.142,7.765,-21.985,0.830,9.992,-24.744,-0.842,8.005,-26.010,-3.773,10.200,-…	MEEEEEEGVWVGYIAVMEDEEEIRRMGRRDVVVVWRGTQTTEEWLKEIDGSIIEPDHDKVGALVSGLHFHVTDLDGDVGIERGFWTLYASGQNSARVQVTDEIRRLVSVYGGGQQGELSITITGHSLGAALALVSAYDVASLGLNSSAPISVISFAGPRVGNAAFKRRLHDELNVHVLRVVNSRDIVPKVPGSLVSLMDDEADEPVDDPTLYNVLHTLLHAAHPAYVHVGIALHLDNTHSPFLKNSLNLADVHN
1DT3	MGYP000379073270	180	117	9	10	171	11	171	1	9.106e-05	129	269	193	FNLFAQYSAAAYCGKNNDAPAGTNITCTGNACP--------EVEKADATFLYSFEDSGVGDVTGFLALDNTNKLIVLSFRGSRSIENWIGNLNFDLKEINDICSGCRGHDGFTSSWRSVADTLRQKVEDAVREHPD------YRVVFTGHSLGGALATVAGADLRGN----GYDIDVFSY	DFTHALLSSHSY-KTSEVGNKVA-FTVDSKGAPHVNAKYNQYLE--DWRVEKVFQPENADDYYSVLYVNDKTHHAVLAHRGTDIPNSLKGK------NASLKAD-------LIEILNHNIGVQQAASYVSTKEALDISQSLGYNFSTTGHSLGAWLAELSLYFCHMDFDYHK--VKAVTF	-29.561,-10.098,9.287,-27.562,-7.298,10.597,-24.735,-7.773,8.487,-22.881,-5.409,10.244,-21.170,-4.058,7.602,-17.996,-4.791,8.942,-16.990,-1.333,8.930,-14.581,-0.795,6.213,-11.418,0.896,7.245,-11.948,4.648,7.199,-9.931,7.022,4.987,-8.186,8.036,8.238,-7.168,4.341,8.871,-5.834,4.222,5.280,-3.867,7.456,6.016,-2.345,5.830,9.131,-1.426,2.563,7.316,0.022,4.552,4.361,2.152,6.535,6.848,3.199,3.324,8.738,4…	NNTSYKSHPTDFTHALLSSHSYKTSEVGNKVAFTVDSKGAPHVNAKYNQYLEDWRVEKVFQPENADDYYSVLYVNDKTHHAVLAHRGTDIPNSLKGKNASLKADLIEILNHNIGVQQAASYVSTKEALDISQSLGYNFSTTGHSLGAWLAELSLYFCHMDFDYHKVKAVTFDSPGSKDQMDVFKSNVDNTETK
1DT3	MGYP000393545141	230	146	10	9	220	15	229	1	1.39e-10	334	269	293	QFNLFAQYSAAAYCGKNNDAPAGTNITCTGNACPEV-EKADATFLYSFEDS-GVGDVTGFLALDNTNKLIVLSFRGSRSIENWIGNLNFDLKEINDICSG----CRGHDGFTSSWRSVADTLRQKVED---AVREHPD----YRVVFTGHSLGGALATVAGADLR-GNGYDI----DVFSYGAPRVGNRAFAEFLTVQTGGTLYRITHTNDIVPRLPPREFGYSHSSPEY	NALILARLCEAAY-EEDP------------ARARAVAEELGLTGFIWIDFTKQFEDVYAIAASGA--GFAVIAFRGTQNFNNWMTDLHATPVSFPWIFDRGPDVGAIHAGFGHALRDAWPKIQAALDGLIPTPDVAPGMTQAPTLWLTGHSLGGALAVLAGAAFSMWSDAPIRSVNGIYTFGQPRVGLYKFCGNYDHLLSRKTFRFVNNQDLVPRVPFRGWDYADLGQMI	-5.631,0.697,21.026,-8.235,2.649,18.984,-11.127,0.680,17.566,-10.972,0.138,13.804,-13.387,2.521,12.112,-14.752,0.441,9.177,-16.950,3.384,8.064,-14.379,6.141,8.099,-15.305,8.174,5.081,-11.884,9.720,4.946,-8.576,9.559,6.908,-8.653,8.002,10.450,-5.563,8.284,12.675,-6.802,5.141,14.579,-7.115,3.162,11.280,-3.601,4.464,10.278,-2.068,2.999,13.459,-3.934,-0.386,13.173,-2.901,-0.669,9.477,0.729,0.340,10.3…	MPAFDAEAPAFSAGNALILARLCEAAYEEDPARARAVAEELGLTGFIWIDFTKQFEDVYAIAASGAGFAVIAFRGTQNFNNWMTDLHATPVSFPWIFDRGPDVGAIHAGFGHALRDAWPKIQAALDGLIPTPDVAPGMTQAPTLWLTGHSLGGALAVLAGAAFSMWSDAPIRSVNGIYTFGQPRVGLYKFCGNYDHLLSRKTFRFVNNQDLVPRVPFRGWDYADLGQMIHFDHNGKPKLQSAQWSSFLSRAFQSFKEFFDIAGHAQSDVRDHDMTGYANLVSAQQNDLTTLFT
1DT3	MGYP000394143614	180	122	8	51	228	3	166	1	1.777e-07	242	269	171	FLYSFEDSGVGDVTGFLALDNTNKLIVLSFRGSRSIENWIGNLNFDLKEINDICSGCRGHDGFTSSWRSVADTLRQKVEDAVREHPDYRVVFTGHSLGGALATVAGADLRGNGYDIDVFSYGAPRVGNRAFAEFLTVQTGGTLYRITHTNDIVPRLPPREFGYSHSS--PEYWIKSGTLV	ITEVFYIRTQNFVYGYFIII--KKILYIVFRGTKNLINMLTFIKYDISE-----SG--FHDGYITSFENNIEPALFKYINKIKHK-FKRIVLTGHSAGAIYATIAAYKLAQHGYKPELVGFGCPRFCIKEIMTD--IKKKVKLRYYVNDGDIITKLPYG--KYVETPIYKK--MKCNYVL	-23.158,5.653,12.697,-21.263,2.570,12.527,-18.147,4.154,12.640,-16.440,3.336,15.803,-12.992,4.783,15.667,-10.604,6.852,13.474,-6.778,6.838,13.733,-4.338,8.756,11.635,-0.897,7.835,10.366,0.871,11.147,9.949,3.909,13.248,10.412,3.850,16.963,11.176,3.538,17.758,7.569,1.993,14.819,5.924,-0.897,12.406,6.483,0.008,9.007,5.152,-3.319,7.385,5.939,-6.025,6.601,8.444,-7.671,3.641,10.142,-11.405,3.292,10.446…	SDITEVFYIRTQNFVYGYFIIIKKILYIVFRGTKNLINMLTFIKYDISESGFHDGYITSFENNIEPALFKYINKIKHKFKRIVLTGHSAGAIYATIAAYKLAQHGYKPELVGFGCPRFCIKEIMTDIKKKVKLRYYVNDGDIITKLPYGKYVETPIYKKMKCNYVLDSIPN
1DT3	MGYP000394925846	150	101	6	63	205	26	169	1	9.594e-09	249	269	358	VTGFLALDNTNKLIVLSFRGSRSIENWIGNLNFDLKEINDICSGCRGHDGFTSSWRS-VADTLRQKVEDAVREHPDYRVVFTGHSLGGALATVAG------ADLRGNGYDIDVFSYGAPRVGNRAFAEFLTVQTGGTLYRITHTNDIVPR	YFAVRKRIEGHPVYIVAITGTEGKREFLSNLNYKLTPYRD-SLEEQVHHGYYEMAENIAADRFFQHIASQLKSDEDALLVVTGHSLGGAVSILLGRYLIDEGLVRPEQ--IEVVTFGAPMMGNAAFIARL-GDYPIQA--YELEYDIIPE	-6.220,11.358,-6.263,-4.065,13.937,-5.029,-6.248,15.523,-2.743,-6.909,12.687,-0.694,-3.532,11.366,-0.781,-2.458,14.688,0.195,-4.613,14.810,3.161,-3.664,11.432,4.242,-0.082,12.213,3.887,-0.396,15.465,5.718,-2.043,13.936,8.684,0.963,11.717,8.912,3.333,14.570,8.889,4.366,14.400,5.331,4.855,17.712,3.480,3.957,18.139,-0.108,7.042,18.981,-2.045,5.694,18.715,-5.595,2.419,18.285,-7.273,1.699,16.581,-10.4…	ATGIAGMYLKDRGWQLARVKNEENKYFAVRKRIEGHPVYIVAITGTEGKREFLSNLNYKLTPYRDSLEEQVHHGYYEMAENIAADRFFQHIASQLKSDEDALLVVTGHSLGGAVSILLGRYLIDEGLVRPEQIEVVTFGAPMMGNAAFIARLGDYPIQAYELEYDIIPEFFQSYSHGYTGKLGQTVVWDSHMPDIAYSHQMMRYLDEAKLRQLHAYGQRKQRESTPGQIYTVLPKIKERFTLSSDVLEGYQWGVIEAQETALKEPVYVDTESKTIEEALHRAKELGYEQVYWTELSFFVKRESQVRNYYVIIEKYVYRTTDGHVLHWAQDICQSGEYSLLVSMIDRVETYGSQAEEEK
1DT3	MGYP000408353155	147	88	7	77	222	10	141	1	9.579e-08	236	269	203	VLSFRGSRSIENWIGNLNFDLKEINDICSGCRGHDGFTSSWRSVADTLRQKVEDAVREHPDYRVVFTGHSLGGALATVAGADLRGNGYDID-VFSYGAPRVGNRAFAEFLTVQTGGTLYRITHTNDIVPRLPPREFGYSHSSPEYWI	PIY---ADDPTDLGDDADVLLKPW---RAGGSVHAGFLKAL----DEVRDALDDAMKSF-GLPILFTGHSLGAALATLA-TSLYKPTNEFTALYTFGSPRVGDSVFVATL---DGINLYRYVDCCDLVTKFPLPEMGYAHAGPACYI	0.239,-26.276,15.343,-3.048,-25.985,14.247,-2.846,-24.643,10.871,-4.424,-21.369,10.733,-6.591,-21.228,7.918,-6.427,-17.895,6.407,-8.493,-16.488,3.709,-6.824,-14.382,1.195,-8.900,-11.914,-0.657,-7.247,-10.417,-3.617,-8.605,-7.147,-4.690,-8.064,-6.368,-8.375,-8.915,-3.273,-10.069,-9.766,-4.542,-13.449,-9.786,-1.429,-15.254,-7.046,0.886,-15.483,-8.880,3.040,-17.789,-10.832,4.555,-15.257,-8.279,6.619…	MTGVQTCALPIYADDPTDLGDDADVLLKPWRAGGSVHAGFLKALDEVRDALDDAMKSFGLPILFTGHSLGAALATLATSLYKPTNEFTALYTFGSPRVGDSVFVATLDGINLYRYVDCCDLVTKFPLPEMGYAHAGPACYIDRNGLIHLNPSDAAIEEDRVAAELDYLSKYAWKTGNVGVRDLADHAPINYVWAVTTSNDLTC
1DT3	MGYP000412740280	246	127	13	2	234	6	200	1	2.531e-06	184	269	222	VSQDLFNQFNLFAQYSAAAYCGKNNDAPAGTNITCTGNACPEVEKADATFLYSFEDSGVGDVTGFLALDNTNKLIVLSFRGSRSIE-----NWIGNLNFDLKEINDICSGC-------RGHDGFTSSWRSVADTLRQKVEDAVREHPDYRVVFTGHSLGGALATVAGADLRGNGYDI-DVFSYGAPRVGNRAFAEFLTVQTGGTLYRITHTNDIVPRLPPREFGYSHSSPEYWIKSGTLVPVTRND	ISL----LTKALFKICAKSY--KEHTFVEK----------------EVE---CF-------VTKY------KGCQVVAFRGTEASKFFSGGGWRDV-------IRDIRSIPWKDKRVGWSHAGFLKGARAVVDK--HLVKSLDRN---IPIYVTGHSLGGALAINASALLHAEGFIIKKVVTFGSPRTFTKDTVK-LFRKTYIEVDQYSNLGDPIPDVPFRFFGYRHINEIHTKRRRKGYSILRNH	0.360,-20.006,-8.208,-2.992,-20.246,-6.656,-5.241,-18.177,-8.782,-7.289,-16.945,-6.024,-9.776,-15.045,-7.764,-10.163,-11.423,-6.977,-12.452,-11.099,-3.992,-15.454,-8.722,-3.849,-13.544,-7.023,-1.043,-10.443,-6.506,-3.227,-12.675,-4.744,-5.791,-14.235,-2.604,-3.146,-10.872,-1.615,-1.718,-9.558,-0.865,-5.213,-12.534,1.520,-5.772,-11.788,3.182,-2.454,-8.078,3.341,-3.342,-8.931,4.974,-6.690,-11.243,7…	MNNKGISLLTKALFKICAKSYKEHTFVEKEVECFVTKYKGCQVVAFRGTEASKFFSGGGWRDVIRDIRSIPWKDKRVGWSHAGFLKGARAVVDKHLVKSLDRNIPIYVTGHSLGGALAINASALLHAEGFIIKKVVTFGSPRTFTKDTVKLFRKTYIEVDQYSNLGDPIPDVPFRFFGYRHINEIHTKRRRKGYSILRNHMIPHYKEALYVQVRKKVKKESS
1DT3	MGYP000417472197	144	92	5	72	206	5	133	1	2.125e-06	209	269	277	TNKLIVLSFRGSRSIENWIGNLNFDLKEINDICSGCRGHDGFTSSWRSVADTLRQKVEDAVREHPDYRVVFTGHSLGGALATVAG--------ADLRGNGYDIDVFSYGAPRVGNRAFA-EFLTVQTGGTLYRITHTNDIVPRL	DLRNVVLALRGTKERDEIFVDLAAQLVKW----DDGYAHNGFLRSYEKLDKLVRPVIQEQMKNFPDYSFRVVGHSMGAAVASLLTIKWYQEYPDWDI------HGYGYATPCCVSGDLSRESEP-----YFTTFVHHHDAVSRL	-13.038,-16.052,10.246,-14.334,-15.560,13.730,-11.880,-15.585,16.583,-13.599,-16.107,19.922,-10.322,-15.484,21.795,-9.842,-12.074,20.278,-13.606,-11.272,19.874,-13.032,-10.397,16.184,-14.730,-11.069,12.868,-11.828,-11.047,10.394,-11.960,-10.585,6.608,-8.573,-11.520,5.036,-7.868,-10.346,1.465,-5.147,-11.833,-0.726,-2.951,-9.901,-3.183,-2.621,-10.587,-6.865,-1.463,-14.089,-7.847,0.053,-13.127,-11.0…	MCSSDLRNVVLALRGTKERDEIFVDLAAQLVKWDDGYAHNGFLRSYEKLDKLVRPVIQEQMKNFPDYSFRVVGHSMGAAVASLLTIKWYQEYPDWDIHGYGYATPCCVSGDLSRESEPYFTTFVHHHDAVSRLSMGSIQDLHNGMRLFVSRVKEQYKQLAFLRSLNLALHSESKKVLAIVAEINDIITKNMQKELTGGDSPAHLLPAGKTYQLWREKRGSKFTTWQMYRSTSTDYARLTFSPTMLKDHGSQGYNSAFENMLSISVTERKIWLKMSIE
1DT3	MGYP000427502163	153	101	5	69	206	1	148	1	1.301e-06	219	269	326	LDNTNKLIVLSFRGSRSIENWIGNLNFDLKEINDI-------CSGCRGHDGFTSSWRSVADTLRQKVEDAVR-------EHPDYRVVFTGHSLGGALATVAGADLRGNGYDIDVFSYGAP-RVGNRAFAEFLTVQTGGTLYRITHTNDIVPRL	MPTAWRSVVITIRGTFSLEDCVTDVLISPESLAELGSEFGFDASEQYCHGGMLACVRNVYRDL-QHHNLLDRLLYGNDAQYPDYTLRIVGHSLGASTGTILSFMLRQKFPTLRCINYSPPGHSISWEMAIECQE----WCNTFILDSDLVPRL	-9.097,-14.267,21.783,-7.567,-11.697,24.022,-9.604,-11.551,27.142,-8.459,-8.166,27.937,-10.165,-6.693,24.954,-13.362,-8.906,24.892,-12.961,-9.401,21.100,-13.246,-12.180,18.516,-10.404,-11.442,16.094,-10.174,-12.620,12.412,-6.549,-12.339,11.202,-5.877,-12.283,7.420,-2.340,-12.467,6.147,-1.061,-11.279,2.704,1.173,-13.056,0.258,4.770,-14.036,0.933,6.169,-12.851,-2.291,6.593,-9.163,-3.106,6.735,-10.2…	MPTAWRSVVITIRGTFSLEDCVTDVLISPESLAELGSEFGFDASEQYCHGGMLACVRNVYRDLQHHNLLDRLLYGNDAQYPDYTLRIVGHSLGASTGTILSFMLRQKFPTLRCINYSPPGHSISWEMAIECQEWCNTFILDSDLVPRLSLLAMEKLRDEILSLIGRVKVPKIEVAGRLVRGSGLSSCHCFENEIEIEDELAEDVNRLLFDPVQIPPSEYQQQLAHFQQVQEERRESRGLTREVKLFPPGKIVHVVKAGENRTCAHNFSKCLTCGASNAGSFYTPIWIDNDDLNEIVVSPTMGTDHFPNRISATLQAVASNYGISQR
1DT3	MGYP000430463152	244	143	17	1	215	17	234	1	1.941e-07	189	269	260	EVSQDLF-----NQFNLFAQYSAAAYCGKNNDAPAGTNITCTGNACPEV---EKADATFLYSFEDSGVGDVTGFL--------ALDNTNKLIVLSFRGSRS------IENWIGNLNFDLKEINDICSGCRGHDGFTSSWRSVADTLRQKVEDAVREHPDYRVVFTGHSLGGALATVA-GADLRGNGYD---IDVFSYGAPRVGN---RAFAEFLTVQTGGTLYRITHTNDIVPRLPPREFGYSH	ALNRRTFCSPPSKYSKKIARIAGS--IDSDNTA----DGEVELKTLKLLGFKQEN-IQIFA--QESD--TIILAEKQIDIKRNAVT----LKVISIRGSDVAFTENAFKDWISNF-----DVGKLFKGA-EHKGFAQSTDLI--TSSREFQNFIKNRKDTIFLVTGHSRGGAIAAEIMNHMLKELDFPGDNIYGYTFGAPSTIRGEDEVDTRI---GELVGLHQIENENDNVPKLPPQAWGWSN	1.480,-14.370,17.520,-1.298,-16.528,17.271,-3.370,-13.587,16.932,-2.603,-12.704,13.605,-3.157,-16.089,12.239,-6.666,-15.804,12.622,-7.413,-12.453,11.460,-6.896,-13.498,8.211,-8.617,-16.611,8.413,-11.545,-14.727,8.881,-11.090,-11.904,6.813,-10.633,-14.300,4.365,-12.139,-17.526,5.473,-11.378,-20.672,7.407,-8.434,-22.544,8.764,-5.124,-21.389,8.596,-2.570,-22.196,10.978,-0.385,-19.449,10.268,2.922,-1…	MKFIKRIFKRLFGRKLALNRRTFCSPPSKYSKKIARIAGSIDSDNTADGEVELKTLKLLGFKQENIQIFAQESDTIILAEKQIDIKRNAVTLKVISIRGSDVAFTENAFKDWISNFDVGKLFKGAEHKGFAQSTDLITSSREFQNFIKNRKDTIFLVTGHSRGGAIAAEIMNHMLKELDFPGDNIYGYTFGAPSTIRGEDEVDTRIGELVGLHQIENENDNVPKLPPQAWGWSNRGTVHTISFPGKMFEAHSLKSYVRFL
1DT3	MGYP000431790995	191	88	8	53	183	15	197	1	0.0006575	114	269	201	YSFE-------DSGVGDVTGFLALDNTNKLIVLSFRGSRSIENWIGNLNFDL--------KEINDICSG---------CRGHDGFTSSWRSVADTLRQKVEDAVREHPDYRVVF--TGHSLGGALATVAGAD----------------------------------LRGNGYDIDVFSYGAPRVGNRAFAE	YEVDIDDGSNDDGESGNSVSSNK------CLWVSFRGTMNITQAQLDLDTTQVAMNIVHHKTNEDRTMKYPHTIDGVCGHVHRGFWTGYSAIRLQLFEAITN-IQESEKY-STVCCTGHSLGGAIAAIAALDIKLFLSSEDVLAPLEAMGNFNSNPPPWREKTFKVGQMNNVAVELYTLGAPRPGDSLFYQ	-7.491,13.032,-5.722,-5.972,15.932,-7.692,-4.177,15.766,-10.947,-0.514,16.581,-10.738,0.717,18.214,-13.803,2.779,15.416,-14.365,-0.186,13.622,-15.024,0.308,10.658,-13.227,-2.987,10.380,-11.964,-3.155,7.501,-9.783,-6.720,6.754,-8.934,-7.537,5.131,-5.752,-10.951,4.091,-4.560,-11.652,3.355,-0.995,-14.760,1.438,-0.192,-16.114,-0.770,2.614,-17.451,-4.222,2.499,-19.032,-6.165,5.263,-17.684,-9.615,4.994…	LEEDEDNVAVYVILYEVDIDDGSNDDGESGNSVSSNKCLWVSFRGTMNITQAQLDLDTTQVAMNIVHHKTNEDRTMKYPHTIDGVCGHVHRGFWTGYSAIRLQLFEAITNIQESEKYSTVCCTGHSLGGAIAAIAALDIKLFLSSEDVLAPLEAMGNFNSNPPPWREKTFKVGQMNNVAVELYTLGAPRPGDSLFYQMHRR
1DT3	MGYP000440916156	247	166	9	1	240	25	248	1	1.093e-14	452	269	289	EVSQDLFNQFNLFAQYSAAAYCGKNNDAPAGTNITCTGNACPEVEKADATFLYSFEDSGVGDVTGFLALDNTNKLIVLSFRGS-RSIENWIGNLNFDLKEINDICSGCRGHDGFTSSWRSVADTLRQKVEDAVREHPDYRVVFTGHSLGGALATVAGADLRGNG------YDIDVFSYGAPRVGNRAFAEFLTVQTGGTLYRITHTNDIVPRLPPREFGYSHSSPEYWIKSGTLVPVTRNDIVKIEG	SLPIHIEEGVN--SLSVDRL----SYCSP----VDIKKFNCEDCN--DRTLIGLYDPPSKASSQAVVVYDDEDNEILVGFRGTINKISQWASDLDTVYTRWKY--GNGNVHSGFYDRFDEIKAPVMSFLRIAKKIHPKASIIVSGHSMGGAVATMFSMYLDTVYPSYSPSF---VYTFGSPRVGDKTFATQVDKTFGDKLIRVMNEWDMVTDLPPTAFGYRHTGKLISCVTGTLK------CTEYGR	-83.521,3.843,-34.157,-81.230,1.573,-32.185,-78.228,3.135,-30.586,-75.665,0.268,-29.475,-73.512,1.310,-26.757,-70.004,-0.128,-27.065,-68.330,-0.125,-23.742,-64.630,0.118,-24.290,-62.947,-2.027,-21.790,-59.630,-0.379,-21.322,-57.107,-2.909,-20.486,-54.745,-1.207,-18.229,-51.474,-2.914,-18.806,-49.468,-2.307,-15.810,-45.952,-2.721,-17.053,-44.070,-3.829,-14.098,-40.664,-2.541,-14.903,-38.710,-4.538…	MIRGLYSTIGIFFVTFITSFSLSSSLPIHIEEGVNSLSVDRLSYCSPVDIKKFNCEDCNDRTLIGLYDPPSKASSQAVVVYDDEDNEILVGFRGTINKISQWASDLDTVYTRWKYGNGNVHSGFYDRFDEIKAPVMSFLRIAKKIHPKASIIVSGHSMGGAVATMFSMYLDTVYPSYSPSFVYTFGSPRVGDKTFATQVDKTFGDKLIRVMNEWDMVTDLPPTAFGYRHTGKLISCVTGTLKCTEYGRLDENKGGLLMALKRVVKTAEDVNLCHLTYLDDTIGSKRYKC
1DT3	MGYP000443836089	156	105	7	65	217	29	170	1	6.047e-08	247	269	218	GFLALDNTNKLIVLSFRGSRSIENWIGNLNFDLKEINDICSGCRGHDGFTSSWRSVADTLRQKVEDAVREHPDYR-VVFTGHSLGGALATVAGADLRGNGYDIDVFSYGAPRVGNRAFAEFLTVQTGGTLYRITHT--NDIVPRLPPREFGYSHSS	VIVKPNRCDNDVIVAIEGSDTLVHWYDNLR--MLKRND------IHRGFH--KYATYCKHKFQLQRTLSKH-KHKKMYFCGHSLGAAAIALLADEFVEYEYDIELVLFGCPRIGGKTFRNAFGKNN---IDVYSYTTMYDIIPELPLSSMGYVPLE	-17.494,5.445,-3.537,-18.361,5.391,0.074,-16.320,2.884,2.007,-18.193,1.016,4.671,-17.300,2.166,8.170,-16.044,-1.220,9.204,-13.754,-1.276,6.256,-12.510,2.105,7.148,-11.538,1.059,10.650,-9.512,-1.948,9.419,-7.832,0.235,6.825,-7.009,2.782,9.594,-5.395,-0.098,11.550,-3.425,-1.082,8.373,-2.248,2.589,8.040,-1.110,2.519,11.684,0.803,-0.689,11.208,2.496,0.988,8.165,3.401,4.031,10.337,4.765,1.687,13.112,7…	MTIPIRTSLKHLECARVCDNVYYHKHSHVIVKPNRCDNDVIVAIEGSDTLVHWYDNLRMLKRNDIHRGFHKYATYCKHKFQLQRTLSKHKHKKMYFCGHSLGAAAIALLADEFVEYEYDIELVLFGCPRIGGKTFRNAFGKNNIDVYSYTTMYDIIPELPLSSMGYVPLESHEIVLQTPYPPNRLIRNHSIRTYIDEICRISTLSGGKECKFGAKERS
1DT3	MGYP000445561308	249	135	13	9	213	8	231	1	9.571e-07	186	269	300	QFNLFAQYSAAAYCGKNND----AP----------------AGTNITCTGNACPEVEKA---D----ATFLYSFEDSGVGDVTGFLALDNTNKLIVLSFRGSRSIENWIGNLNFDLKEINDICSGCRGHDGFTSSWRS-------------VADTLRQKVEDAVREHPDYRVVFTGHSLGGALATVAGADLRGNGYDIDVFSYGAPRVGNRAFAE-FLTVQTGGTLYRITHTNDIVPRLP---PREFGY	QNALLVMYGFDM-CAGVPSDLAPAPDARIAAAGFNLVGYLSASDAILVTGLSLRSRMFGSSNDAMNRVCY-------------GYVAS-RGPAEYIAVIRGTHGLLEWADDLDFLMMRHPN-PGAGLVDQGFWGIYQTLMYHPLAGGGPFPAAQGLANL-------PPGASLTVLGHSLGSALATYLKLDLALQGTPAKGCFFASPHTGSQGFVDCFENTNINYDL--WNYVQDKVPTVPTIDPVHLSS	-4.191,-15.388,-1.341,-7.780,-16.252,-2.278,-10.431,-13.603,-3.347,-12.265,-13.689,0.041,-9.000,-13.026,1.964,-8.151,-10.285,-0.582,-11.589,-8.648,-0.068,-11.100,-8.769,3.747,-7.626,-7.131,3.406,-9.138,-4.445,1.079,-11.651,-3.623,3.922,-8.773,-3.274,6.382,-7.137,-0.720,3.967,-10.466,1.187,3.711,-10.698,1.423,7.517,-7.251,3.072,7.347,-8.649,5.869,5.145,-11.479,6.550,7.643,-9.222,6.371,10.650,-6.52…	MDRVSAAQNALLVMYGFDMCAGVPSDLAPAPDARIAAAGFNLVGYLSASDAILVTGLSLRSRMFGSSNDAMNRVCYGYVASRGPAEYIAVIRGTHGLLEWADDLDFLMMRHPNPGAGLVDQGFWGIYQTLMYHPLAGGGPFPAAQGLANLPPGASLTVLGHSLGSALATYLKLDLALQGTPAKGCFFASPHTGSQGFVDCFENTNINYDLWNYVQDKVPTVPTIDPVHLSSYVPLRQEKTIPVDGLLGVSIDGTLPCFHHLICYVALLDPATYKAALAAATRLQVQDDMNCARCVLSTGS
1DT3	MGYP000449493651	242	141	18	12	234	1	196	1	0.001078	104	269	206	LFAQYSAAAYCG----KNNDAPAGTNITCTGNACPEVEKADATFLYSFE--DSGVGDVTGFLALDNTNKLIVLSFRGS--RSIENWIGNLNFDLKEINDICSGCRGHDGFTSSWRSVADTLRQKVEDAVREHPDYRVVFTGHSLGGALAT----VAGADLRGNGYDIDVFSYGAPRVGNRAFAEFLTVQTG----GTLYRITH--TNDIVPR-LPPREFGYSHSSPEYWIKSGTLVPVTRND	LHAVLAKRVYLDPSERKGLRVASMQVKSVLAL-------GDFWYAYVGGDLRRG------FWYCPAHGGHLILAERGTQIPDAQDLARDACIALGSST----------ALRSR---VEDSQDQ-LQEKCFSHSSARITVTGHSLGGAVAAGLAKCQGPVLD----TVHL--FNPGGL--PDLERYLCWAPGWAPPCQL--RVHRIAGDPISVAFLP-------GLQQNY--SRKRGLEAVDS	2.941,-11.338,4.390,2.387,-7.644,3.556,4.757,-7.755,0.503,2.795,-10.849,-0.744,-0.515,-9.021,-0.385,0.960,-5.847,-2.056,2.088,-8.076,-4.975,-1.236,-9.869,-5.261,-3.130,-6.666,-6.018,-1.384,-6.754,-9.448,-2.624,-10.163,-10.420,-5.064,-10.159,-13.163,-8.585,-10.802,-12.333,-8.332,-13.962,-14.243,-5.570,-15.145,-12.233,-7.808,-14.451,-9.561,-10.356,-16.617,-10.892,-9.192,-18.833,-8.577,-10.284,-16.4…	LHAVLAKRVYLDPSERKGLRVASMQVKSVLALGDFWYAYVGGDLRRGFWYCPAHGGHLILAERGTQIPDAQDLARDACIALGSSTALRSRVEDSQDQLQEKCFSHSSARITVTGHSLGGAVAAGLAKCQGPVLDTVHLFNPGGLPDLERYLCWAPGWAPPCQLRVHRIAGDPISVAFLPGLQQNYSRKRGLEAVDSHSLKHFLHDG
1DT3	MGYP000449916868	280	161	13	1	248	83	334	1	7.542e-13	354	269	425	EVSQDLFNQFNLFAQYSAAA--------YCGKNN----DAPAGTNIT--CTGNACPEVEKADATFLYSFEDSGVGDVTGFLALDNTNKLIVLSFRGSRS-----IENWIGNLNFDLKEINDICSGCRGHDGFTSSWRSVADTLRQKVEDAVREHPDYRVVFTGHSLGGALATVAGADLR----GNGYDIDVFSYGAPRVGNRAFAEFLTVQTGGTLYRITHTNDIVPRLP---PREF------GYSHSSPEYWIKSGTLVPVTRNDIVKIEGIDATGGNN	HFNPDSAFINTLLSAVAYSSIPMTCMDMVLPESGFKLVDAIG-RKCEQLSIFN-------------YA-------ECFAFTAVSDTLKLIVVSFKGTAGGFKQLFDEAVSSTIQPKQPFLI---GGNVQVYFKTVFEKFYSCVKASVHDLVAKNPDYDVVVTGHSLGGALASLTASALIHQGVVSSSKVSLYTFGMPRVGDKDYAIEFDRLVDNS-WRVVRYKDIVPHLPTCSPLGFGCDAIDGPSHHGLEVFYEQDMSVNSS---YTVCESDEDIECSN	47.057,9.939,-44.278,47.780,9.732,-40.727,47.864,12.950,-39.301,44.283,14.097,-39.528,43.018,11.276,-37.527,45.168,12.145,-34.605,43.760,15.505,-34.244,40.311,14.383,-34.232,41.012,12.025,-31.444,42.475,14.772,-29.428,39.543,16.981,-29.921,37.290,14.341,-28.850,39.126,13.828,-25.673,39.033,17.371,-24.594,35.418,17.487,-24.713,34.960,14.852,-22.223,36.937,16.377,-19.503,35.058,19.532,-19.227,31.83…	MNMWIRNLVLLFCFCFAAGSSSCNSKTDCVSCTIKSSWLPGSVCRWCPLDRRCHALGAALHNPCVKNQDITDPKLCYDKTIGHFNPDSAFINTLLSAVAYSSIPMTCMDMVLPESGFKLVDAIGRKCEQLSIFNYAECFAFTAVSDTLKLIVVSFKGTAGGFKQLFDEAVSSTIQPKQPFLIGGNVQVYFKTVFEKFYSCVKASVHDLVAKNPDYDVVVTGHSLGGALASLTASALIHQGVVSSSKVSLYTFGMPRVGDKDYAIEFDRLVDNSWRVVRYKDIVPHLPTCSPLGFGCDAIDGPSHHGLEVFYEQDMSVNSSYTVCESDEDIECSNGIISSCFPVSFGECIAYHSKYYNIPISTYCDRDESGKRSTVEDAEFMSEFTNDMCMRIPFDPSSR…
1DT3	MGYP000452624450	248	138	13	2	237	19	220	1	7.093e-13	393	269	278	VSQDLFNQFNLFAQYSAAAYCGKNNDAPAGTNITCTGNACPEVEKAD----ATFLYSFEDSGVGDVTGFLALDNTNKLIVLSFRGS--RSIENWIGNLNFDLKEINDICSGCRGHDGFTSSWRSVADTLRQKVEDAVREHPDYRVVFTGHSLGGALATVAG-----ADLRGNGYDI-DVFSYGAPRVGNRAFAEFLTVQTGGTLYRITHTNDIVPRLPPREFGYSHSSPEYWIKSGTLVPVTRNDIVK	AYSD--RAAWIMSECSALAY-VENQ---------------SELKKALAAGGFKLIKAF---TEDEITAYVAVSQKHGYAVLAFKGTVLTEKNTIRTDLNFWWYKS----HGVVFHEGFYKAYESLFKDIHSQLKKL-----RLPIYVTGHSLGGALATVCVMKYPDTDR------MAACYTFGAPRVCDLKGVI---EFYKVPVYRLAHSDDVVPTLPFFAMGFTQIGDFRYIND-------QFEVIE	-17.195,7.702,-10.222,-15.382,4.921,-8.907,-17.524,2.942,-6.684,-15.488,2.431,-3.549,-16.252,-0.535,-1.412,-18.912,-1.891,-3.747,-18.990,-5.345,-2.067,-19.945,-4.557,1.431,-19.785,-8.133,2.356,-16.042,-8.087,2.208,-15.819,-5.380,4.816,-14.910,-7.682,7.554,-11.976,-7.508,9.694,-8.410,-8.660,9.845,-8.147,-8.335,13.381,-4.632,-8.658,14.751,-1.430,-9.051,13.143,-2.642,-10.268,10.142,-1.554,-12.988,8.…	MTKYFSDKSLLQPPVARAAYSDRAAWIMSECSALAYVENQSELKKALAAGGFKLIKAFTEDEITAYVAVSQKHGYAVLAFKGTVLTEKNTIRTDLNFWWYKSHGVVFHEGFYKAYESLFKDIHSQLKKLRLPIYVTGHSLGGALATVCVMKYPDTDRMAACYTFGAPRVCDLKGVIEFYKVPVYRLAHSDDVVPTLPFFAMGFTQIGDFRYINDQFEVIEGSAGVFSRLGFQLKCLLTLSFARLVGDHAIGKYADILETIAARRRNDHIQKALKGIKR
1DT3	MGYP000454001348	141	100	7	66	204	15	135	0.995	0.006465	88	269	187	FLALDNTNKLIVLSFRGSR-SIENWIGNLNFDLKEINDICSGCRGHDGFTSSWRSVADTLRQKVEDAVREHPDYRVVFTGHSLGGALATVAGADLRGNGYDIDVF-SYGAPRVGNRAFAEFLTVQTGGTLYRITHTNDIVP	SVWRNNDTGALTLTIRGSKLSMADIGMD-------LSILVGR---TEVESRD-------VDWVMDELEKDFPAQAYDVAAHSLGCNFVFNEMSEHRDNWGELYLFCPGSSPFASTTTLKKYANIS-NAHYFI--NSGDIVP	-21.926,-0.867,-0.260,-19.915,-3.475,1.136,-17.474,-1.069,2.403,-17.766,2.181,4.408,-15.152,4.732,4.526,-13.945,5.981,8.014,-13.344,9.769,7.539,-11.337,10.116,10.864,-8.415,8.324,9.156,-8.466,10.390,5.942,-5.187,11.937,5.205,-3.483,13.217,2.072,-2.206,9.633,1.527,-4.318,7.231,3.556,-7.938,6.076,3.869,-9.409,3.404,6.122,-12.309,1.249,4.941,-14.637,-1.053,6.974,-16.313,-4.054,5.490,-19.952,-3.593,6…	FMFSRLPKYDTSYTSVWRNNDTGALTLTIRGSKLSMADIGMDLSILVGRTEVESRDVDWVMDELEKDFPAQAYDVAAHSLGCNFVFNEMSEHRDNWGELYLFCPGSSPFASTTTLKKYANISNAHYFINSGDIVPDGLRQQMSADTLENNPYWGDYRYAPWSAHSLTQFVPPTFAMGDEPVTLRPGE
1DT3	MGYP000455486402	240	142	13	2	234	7	219	1	1.125e-13	398	269	263	VSQDLFNQFNL-FAQYSAAAYCGKNNDAPAGTNITCTGNACPEVEKADATFLYSFEDSGVGDVTGFLALDNTNKLIVLSFRGSRSIENWIGNLNFDLKEINDICSGCRGHDGFTSSWRSVADTLRQKVEDAVREHPDYRVVFTGHSLGGALATVAGADLRGNGYDIDVFSYGAPRVGNRAFAE-FLT--VQTGGTLYRITHTNDIVPRLPPREFGYSHSSPEYWIK-SG--TLVPVTRND	IEIS--NEGALLAARAAQSAYFNQPTQAI---HPPPTG--------TKTSLICAEF------VQAMLFDRPDG-CFVVAFRGTDESRDWCRSFDFDFDKGPL---GGRVHDGFLSAWEDVRREILPRIGLATIR--GQRIILCGHSLGGAIATLAHADLRALHILATCYSFGAPRVGDAGFVRAYAQEGLDDLH--YRMTRDGDAVPDLPPAFLGFRHVGKHFYATDAGVASAVPGAIRK	-30.292,2.555,-7.724,-27.112,2.692,-5.941,-25.411,-0.349,-7.065,-25.322,-2.257,-3.913,-22.091,-3.508,-4.839,-20.493,-0.374,-4.707,-18.123,-0.922,-2.020,-17.428,2.430,-0.704,-14.065,3.028,0.665,-14.315,3.252,4.387,-12.829,6.672,4.789,-11.956,5.630,8.379,-10.254,2.483,7.098,-8.293,4.547,4.589,-7.273,7.129,7.230,-6.279,4.291,9.652,-4.175,2.671,6.877,-2.525,6.003,5.933,-1.623,6.718,9.613,-0.235,3.152…	MTDPTAIEISNEGALLAARAAQSAYFNQPTQAIHPPPTGTKTSLICAEFVQAMLFDRPDGCFVVAFRGTDESRDWCRSFDFDFDKGPLGGRVHDGFLSAWEDVRREILPRIGLATIRGQRIILCGHSLGGAIATLAHADLRALHILATCYSFGAPRVGDAGFVRAYAQEGLDDLHYRMTRDGDAVPDLPPAFLGFRHVGKHFYATDAGVASAVPGAIRKFFASLKRWAKGEDVRRSHGILSYCHALEKTCGVLSSKKTDTEAA
1DT3	MGYP000456217096	185	113	9	5	168	11	169	0.138	1.395	35	269	293	DLFNQFNLFAQYSAAAYCGKNNDAPAGTNITCTGNACPEVEKADATFLYSFEDSGVGDVTGFLALDNTNKLIVLSFRGSRS----IENWIGNLNFDLKEINDI----------CSGCR-------GHDGFTSSWRSVADTLRQKVEDAVREHPDYRVVFTGHSLGGALATVAGADLRGNGYDIDV	ALAALYAVMVVVATY----VSVHPPRVPLWL-----SPAMLGFPQED-VKIDTGGL-TLTGWWSDGGEGSLVMVCCHGYLMNRCELMPFIVT-------LADLGASWLFFDFRCHGKSGGRLCTMGRDEATD--------VAAAVRFVRARRPGAKIVLFGSSMGGSASAIAVGDDPGLADGLVL	32.540,18.775,-35.810,33.934,16.254,-33.296,33.910,18.634,-30.349,30.304,19.674,-30.735,29.088,16.010,-30.866,30.941,15.167,-27.585,29.464,18.256,-25.782,25.946,17.341,-27.068,26.314,13.747,-25.822,27.579,14.950,-22.424,24.638,17.405,-22.139,22.181,14.570,-22.961,23.920,12.266,-20.389,23.771,15.007,-17.734,20.055,15.716,-18.491,19.341,11.937,-18.261,21.223,11.730,-14.916,19.210,14.718,-13.547,15.…	MGGFLILFLLALAALYAVMVVVATYVSVHPPRVPLWLSPAMLGFPQEDVKIDTGGLTLTGWWSDGGEGSLVMVCCHGYLMNRCELMPFIVTLADLGASWLFFDFRCHGKSGGRLCTMGRDEATDVAAAVRFVRARRPGAKIVLFGSSMGGSASAIAVGDDPGLADGLVLDGAYSSMDEAGRGWWDFLGGKVAAVLLRPTLWIGRLFVGFNPAKVVIADYLMKAQHKPVLFLAGDDDPVVPIASLERNVVASGSLTWVEKFEGSGHGEARFREPERYVDAVRRFVRGEVLGVGP
1DT3	MGYP000456265892	232	128	11	39	238	98	309	1	1.478e-10	304	269	358	NACPEVEKADATFLYSFEDSGVGDVTGFLALDNTNKLIVLSFRGSR--SIENWIGNLNFDLKEINDICSGCRGHDGFTSSWRSVADTLRQKVEDAVR--EHPDYRVVFTGHSLGGALATVAGADLRGNGYDIDVFSYGAPRVGNRAFAEFLTVQTGGTLYRITHTNDIVPRLPP-----------------------REF-----GYSHSSPEYWIKSGTLVPVTRNDIVKI	NELKNL---DMKLLQTFD---EAGSQAILVS--YDNNIVLSFRGTEPTSIKDIKADAKAKITHCD--SKEGRIHSGFKEAYKLLEKQ----IENELRLPVYGDKVLYITGHSLGGALATIAAKRLIHKGGIAACYTFGSPRVGDEKWIS----NIHVPLYRLVNAADSVTMLPPGTELIGSLSWLFQFIPLIGNSVSKTINSKFDGYIHCGNMRYMTN--CIRGEFDDVKLL	-13.149,-4.098,-14.766,-13.505,-2.844,-11.298,-11.700,-5.178,-9.143,-14.268,-6.105,-6.624,-13.256,-8.852,-4.406,-14.724,-11.444,-6.373,-15.067,-13.964,-3.833,-16.159,-17.398,-4.389,-18.596,-18.647,-1.806,-15.709,-20.348,-0.196,-13.859,-17.153,-0.111,-16.787,-15.423,1.459,-16.961,-18.000,4.058,-13.309,-17.459,4.749,-13.889,-13.789,4.857,-16.677,-14.102,7.255,-14.582,-16.305,9.401,-11.714,-13.941,9…	MSRIIENSSEELEKISSISTSNGSHTNEAFSSKTAWLMACLSELSYVKFNAFFKNCEQKDYLIKNVEKLISKKRKNAFQKVLEMVAYDHEEEKEKLINELKNLDMKLLQTFDEAGSQAILVSYDNNIVLSFRGTEPTSIKDIKADAKAKITHCDSKEGRIHSGFKEAYKLLEKQIENELRLPVYGDKVLYITGHSLGGALATIAAKRLIHKGGIAACYTFGSPRVGDEKWISNIHVPLYRLVNAADSVTMLPPGTELIGSLSWLFQFIPLIGNSVSKTINSKFDGYIHCGNMRYMTNCIRGEFDDVKLLYSVSFFYRIKGFILSSLPWAKIMGDHSISVYRKKLAVIAQQSITKLKEK
1DT3	MGYP000458481603	168	110	6	58	222	1	162	1	4.743e-10	343	269	194	SGVGDVTGFLALDNTNKLIVLSFRGSRSIENWIGNLNFDLKEINDICSGCRGHDGFTSSWRSVADTLRQKVEDAVREHPDYRVVFTGHSLGGALATVAGADLR-GNGYDIDVFSYGAPRVGNRAFAEFLTVQTGGTLYRITHTNDIVPRLPPR--EFGYSHSSPEYWI	SGIF---GLMGKNPATKTAFVAFRGTQTFEDWVGDFDSLFEPYKYVPNGGQVHMGFQSIYGALHDSVAAGIGAAITGC-D-HLLVTGHSLGGALAVVAGPDLAKSLPIVPELITFAGPAAGLADFVRFFDLVIP-SCYRVVNFWDLVPRLPPQSPVGLYEQSGTHVNI	10.941,8.415,15.697,8.497,9.072,13.165,4.997,7.744,13.236,4.916,5.438,10.362,1.354,4.471,10.759,-2.036,4.555,12.526,-4.168,1.631,13.743,-7.664,1.531,15.060,-11.145,0.167,14.703,-14.555,1.466,13.736,-17.020,-0.341,16.083,-20.078,0.680,13.885,-18.785,-1.223,10.865,-16.739,-3.839,12.768,-13.658,-2.805,10.808,-10.088,-2.768,12.027,-7.680,-0.629,10.022,-3.926,-0.017,9.513,-2.805,3.113,7.673,0.882,3.42…	SGIFGLMGKNPATKTAFVAFRGTQTFEDWVGDFDSLFEPYKYVPNGGQVHMGFQSIYGALHDSVAAGIGAAITGCDHLLVTGHSLGGALAVVAGPDLAKSLPIVPELITFAGPAAGLADFVRFFDLVIPSCYRVVNFWDLVPRLPPQSPVGLYEQSGTHVNIDPGFAPAIEAHSLEQSYIPGLLGLLPKGYTCS
1DT3	MGYP000462789598	180	85	6	82	208	40	208	0.855	0.0816	64	269	252	GSRSIENWIGN-------------LNFDLKEINDICSGCRGHDGFTSSWRSVADTLRQKVEDAVREHPDYRVVFTGHSLGGALATVAGADLRGNGYDIDVFSYGAPRVGNRAFAEFLTV---------------------------------QTGGTLY--RITHTND-----IVPRLPP	GLKSHPIWAEGHRSRIESQHPDMEIRIPLVPKNGDCS-------LEEA----AAPIVEMVRDYIKKHPQKPICLMGTSNGGRIAAKVETALRGEGAAIRVSTLAGVFFGSQRMNQMVNLHIANHLYHPSVIEELQVGSKVSRALIEQMRAPLQGEDVRAYEFFTSTNDEFVPNFGSCLPI	32.655,-9.460,-6.692,29.897,-10.261,-8.836,27.227,-9.558,-6.571,25.170,-11.315,-8.536,22.614,-9.723,-6.598,21.568,-12.372,-4.215,18.334,-11.368,-5.572,18.623,-13.466,-8.587,18.482,-16.405,-6.623,15.162,-15.781,-5.375,13.224,-15.506,-8.391,13.412,-18.984,-8.729,11.200,-20.606,-6.536,7.773,-20.184,-6.003,7.460,-21.301,-2.613,4.484,-23.501,-2.705,3.137,-22.067,0.244,2.167,-19.162,-1.223,-1.236,-19.9…	FSLAPAWIRYQIHPHPSYCDPCQDQSWREGNQGLYVFVTGLKSHPIWAEGHRSRIESQHPDMEIRIPLVPKNGDCSLEEAAAPIVEMVRDYIKKHPQKPICLMGTSNGGRIAAKVETALRGEGAAIRVSTLAGVFFGSQRMNQMVNLHIANHLYHPSVIEELQVGSKVSRALIEQMRAPLQGEDVRAYEFFTSTNDEFVPNFGSCLPILGQGETFHVVEGENHFSITQAVREKQLQNSYKWMASSHASALSV
1DT3	MGYP000471491335	258	161	15	8	258	4	215	1	5.536e-11	354	269	234	NQFNLFAQYSAAAYCGKNNDAPAGTNITCTGNACPEVEKA-DATFLYSFEDSGV-GDVTGFLALDNTNKLIVLSFRGSRSIENWIGNLNFDLKEINDICSGCRGHDGFTSSWRSVADTLRQKVEDAVREHPDYRVVFTGHSLGGALATVAGAD--LRGNGYDIDVFSYGAPRVGNRAFAEFLTVQTGGTLYRITHTNDIVPRLPPREFGYSHSSPEYWIKSGTLVPVTRNDIVKIEGIDATGGNNQ---PNIPDIPAH	SNIHICSKLASEAY----------------EN---ELQSIPDSQLL-----INKATDCEAHIGI--LGNTLYIASRGTSSLKDAVQDLKMWRSRCE-FLKNTNIHRGFLNQYLSIRTKLHKEIENRIDINIK-CIIFTGHSLGAAISTIAALDFKLQNSDRIVKCITFASPRVGCQQFAKEFNKHVDI-SHRLVYHRDPVTF-SPFCLRFRHVKGCIHFK--------KDK-----SI---EHDDKYFFPLGCLVSQH	-13.520,10.419,-1.489,-13.053,8.863,1.837,-10.777,11.408,3.528,-11.394,9.956,6.978,-9.919,6.524,5.869,-7.045,8.376,4.103,-6.273,10.274,7.349,-6.492,7.043,9.466,-4.275,5.193,6.891,-1.647,7.987,6.945,-1.285,7.445,10.760,-1.281,3.645,10.451,1.376,3.820,7.668,3.538,5.961,9.985,2.856,3.768,13.072,3.809,0.640,11.007,7.466,1.698,11.529,6.886,1.383,15.258,6.357,-1.847,17.263,2.619,-1.084,17.670,-0.317,0.…	MDKSNIHICSKLASEAYENELQSIPDSQLLINKATDCEAHIGILGNTLYIASRGTSSLKDAVQDLKMWRSRCEFLKNTNIHRGFLNQYLSIRTKLHKEIENRIDINIKCIIFTGHSLGAAISTIAALDFKLQNSDRIVKCITFASPRVGCQQFAKEFNKHVDISHRLVYHRDPVTFSPFCLRFRHVKGCIHFKKDKSIEHDDKYFFPLGCLVSQHFMHNYEDRVSDWVHNEEAD
1DT3	MGYP000476275359	262	169	10	1	239	6	253	1	3.813e-12	362	269	289	EVSQDLFNQFNLFAQYSAAAYCGKN---NDAPAGTNI------TCTGNACPEVEK---------ADATFLYSFEDSGVGDVTGFLALDNTNKLIVLSFRGSRSIENWIGNLNFDLKEI--NDICSGCRGHDGFTSSW--RSVADTLRQKVEDAVREHPDYRVVFTGHSLGGALATVAGADL-RGNGYDIDVFSYGAPRVGNRAFAEFLTVQTGGTLYRITHTNDIVPRLPPREFGYSHSSPEYWIKSGTLVPVTRNDIVKIE	KISFSLVNE--LISQTCLIYNCKKKTILKEQQCGFVVNILNIESLKISNTQKIMIGDLFKLNHVENIFINKLFN---INNIQVAIIFNNQQGYINIIFSGQDDFLDLLNPLHIFKKQIGNNIDVKNIKVHGGFYDLLFKNNLYSDVLNEIIKLQDLHPGCRINIAGHCIGGALATLFGFFLSYSIRSNINIFSFGSPRVGNKKWANIFNSKNNLIHYRFVNQNDIINLFP--HFYYHHCGDMLFIKKNCC-------IDFIN	11.520,-18.653,15.467,10.580,-16.840,12.500,7.384,-16.059,13.281,6.316,-16.662,10.038,3.486,-14.611,9.966,0.974,-16.469,8.118,-0.507,-14.016,5.738,-4.243,-14.764,5.368,-4.898,-15.114,1.661,-8.576,-14.358,2.387,-7.477,-10.952,3.806,-5.110,-10.377,0.790,-8.040,-11.107,-1.618,-10.314,-8.809,0.366,-7.761,-5.922,0.350,-6.868,-6.291,-3.379,-10.612,-6.416,-4.256,-11.250,-3.277,-2.194,-8.215,-1.630,-3.87…	MNNSYKISFSLVNELISQTCLIYNCKKKTILKEQQCGFVVNILNIESLKISNTQKIMIGDLFKLNHVENIFINKLFNINNIQVAIIFNNQQGYINIIFSGQDDFLDLLNPLHIFKKQIGNNIDVKNIKVHGGFYDLLFKNNLYSDVLNEIIKLQDLHPGCRINIAGHCIGGALATLFGFFLSYSIRSNINIFSFGSPRVGNKKWANIFNSKNNLIHYRFVNQNDIINLFPHFYYHHCGDMLFIKKNCCIDFINKKDYEDTSSIMNNHSIKQNKIEKYYEKINSCYNIKI
1DT3	MGYP000479688265	139	64	9	113	205	116	244	0.126	4.513	34	269	286	FTSSWRSVADTLRQKVEDAVREHPDYRVVFTGHSLGGALATVAGADLRGNGYDIDVF-S-----YGAPRVGNRAFAEFLTVQ----------TG----------------------------GTLYRITHTND-IV-PR	LTFQ----SAALGDWLCDIKQASPNNKLVVVAHSYGATLTPKLAMDHPQCISAALLLAGGADPKLTAPR----WYNNLAHYPPVSWLASLASMGLKRSNNEMMTVKSELKKIQLDWQKLKLPITV--IQGEEDGLVHPG	26.199,38.475,-36.711,24.642,39.373,-33.407,23.607,36.147,-31.936,20.081,36.727,-30.511,20.521,35.978,-26.845,16.883,35.885,-26.348,16.284,32.354,-26.433,18.245,31.206,-23.526,16.488,33.426,-21.083,13.118,32.060,-22.012,14.194,28.525,-21.546,15.636,29.241,-18.209,12.523,31.008,-17.015,10.341,28.147,-18.162,12.512,25.649,-16.347,12.435,27.692,-13.179,8.676,28.183,-13.276,8.254,24.553,-13.893,10.38…	MKLQTKPLLTITAAILTGAVILSRCISFEVDPITVIDSNGKPAIEQTVQLDQTALHYLESGNSAGTVLVFIHGTPGSMGFFSGYITDPRLAQTRNITIDRPGWGKSTVDGPFDPTLTFQSAALGDWLCDIKQASPNNKLVVVAHSYGATLTPKLAMDHPQCISAALLLAGGADPKLTAPRWYNNLAHYPPVSWLASLASMGLKRSNNEMMTVKSELKKIQLDWQKLKLPITVIQGEEDGLVHPGNADFIETQLSHIPAKVIRVEGAGHVLRESHRNLIIDEILNLL
1DT3	MGYP000485663423	271	141	15	2	206	20	270	1	1.153e-07	219	269	432	VSQDLFNQFNLFAQYSAAAYCGKNNDAPAGTNITCT-------------GN--------------ACPEV----EKADATFLYS----FEDSGVGDVTGFLALDNTNKLIVLSFRGSRSIENWIGNLNFDLKEINDICSGCRGHDGFTSSWRSVADTLRQKVEDAVREHPDYRVVFTGHSLGGALATVAG------------------------------ADLRGNGY-DIDVFSYGAPRVGNRAFAEFLTVQTGGTLYRITHTNDIVPRL	PSEDDLSRVRVAVKHAIGAYGTA---SAALGDASLREKLTSLANASDIGGASSNDRAMAHAKATEACAKSAGIAPTD---IIDADWTGTEFSP--SA--FVAVDAAEGVVVLSIRGTWEAHDALTDVSSSSVPF--L--GGWAHAGMVASAWQVLKRMAPALATSLAKHPTFTLLVTGHSMGGGVAACVAMLLHSDDDDVKLAAAISLRRESAIDVAEQDEVLRRMALCACV--CIAAPSVSSMDLSEAASA--YITC--VVAGADVVPRL	10.580,15.716,-25.514,8.175,17.836,-27.442,8.094,15.230,-30.046,7.458,12.452,-27.789,4.663,14.285,-26.177,3.397,14.932,-29.538,3.669,11.380,-30.502,1.867,10.298,-27.549,-0.710,12.856,-28.174,-0.916,11.772,-31.561,-1.205,8.339,-30.771,-3.999,9.116,-28.724,-5.480,12.186,-30.028,-8.767,11.439,-28.755,-8.285,10.984,-25.436,-9.829,13.769,-23.904,-8.715,13.606,-20.463,-11.222,11.412,-18.996,-12.676,12.…	ERDRRRAVRELYPHMRPEVPSEDDLSRVRVAVKHAIGAYGTASAALGDASLREKLTSLANASDIGGASSNDRAMAHAKATEACAKSAGIAPTDIIDADWTGTEFSPSAFVAVDAAEGVVVLSIRGTWEAHDALTDVSSSSVPFLGGWAHAGMVASAWQVLKRMAPALATSLAKHPTFTLLVTGHSMGGGVAACVAMLLHSDDDDVKLAAAISLRRESAIDVAEQDEVLRRMALCACVCIAAPSVSSMDLSEAASAYITCVVAGADVVPRLCHASVRRLLRRLNASAPSHAMLKAFSSVLGGRDRPAEADVDSLCGGDSDNEGNDNDGDGVREIGMNSTSNAASTVGESSTPMTSPSKDGDTKRRREDAKRNKCQGAWGELEDVVGLELRDHAATDFMVQ…
1DT3	MGYP000486063702	163	92	9	62	207	69	219	1	1.018e-06	207	269	295	DVT-GFLALDNTNKLIVLSFRGSRSIENWIGNLNFDLKEINDICSG--CRGHDGFTSSW------------RSVADTLRQKVEDAVREHPDY-RVVFTGHSLGGALATVAGADLRGNGYDIDVFSYGAPRVGNRAFAE-FLTVQTGGTLYRITHTNDIVPRLP	RVCYGYVATR--NDETVVVIRGTDGAEEWGDDLDFLMQHHT--TSGVLGLVDQGFFGIYATMQFHPLDKPDPG------QPVVQAIKDTAHANRVMVLGHSLGAAIATYLTLDLNLAGLPASACLFASPRTGNQDFVDYFEDKVSNYDLFN--YERDLVPQVP	-9.848,11.209,3.260,-8.290,14.295,4.651,-4.435,14.651,5.051,-4.675,14.415,8.847,-6.548,11.136,8.712,-3.935,9.795,6.292,-1.146,10.864,8.736,-2.881,8.656,11.433,-2.637,5.530,9.213,0.995,6.044,8.135,2.358,4.817,11.546,0.449,1.528,11.174,2.446,0.860,7.926,5.763,1.781,9.712,4.954,-0.717,12.499,4.528,-3.423,9.794,8.258,-3.012,9.006,9.241,-3.279,12.649,7.266,-6.464,13.034,7.965,-7.984,9.637,11.670,-7.57…	MDRYTAATYAPLIMYAWDMCDKSLHQIPPVADPRIAAKGWEIIGFLSAGDDIVKAGTSIRSPLMGTGDRVCYGYVATRNDETVVVIRGTDGAEEWGDDLDFLMQHHTTSGVLGLVDQGFFGIYATMQFHPLDKPDPGQPVVQAIKDTAHANRVMVLGHSLGAAIATYLTLDLNLAGLPASACLFASPRTGNQDFVDYFEDKVSNYDLFNYERDLVPQVPKFDLLHLSTYEPLHQAKTIPVSGSAATVNDDPKCNHHLICYTALLDPAAYLTEMGNPGLVQDDRNCAKCVLSPSDW
1DT3	MGYP000486266439	246	159	10	9	219	12	244	1	2.88e-10	305	269	247	QFNLFAQYSAAAYCGKNNDAP---AGTNITCTGNACPEVEKADATFLYSFEDSGVGDVTGFLALDNTNK------LIVLSFRGSRSIENWIGNLNFDLK-------------EINDICSGCRGHDGFTS--SWRSVADTLRQKVEDAVREHPDYRVVFTGHSLGGALATVAGADLR---GNGYDIDVFSYGAPRVGNRAFAEFLTVQTGGTLYRITHTNDIVPRLPP----REF----GYSHSSPE	MELLHLSYDIYAYRGLSSCEEILHSNTTRPLPPD---------ATCHMYE--TSLLDTQVMVVSRPPGKGGLAKGYVAAVYAGTDDFRNFFTDGDIIQTSFGTYANGTYPFVPKD--HPDIEVHMGFNNAVFKHGLFDRVLETVQSVLKKHPHYQLVTTGHSLGASDSVLTSVAMSQKFGPDRNVLCINFGCPRTGNRAWRDYVNGLPNVGIWRFVNNIDIGNFVKSTALLFRYFFRSSTAHTHID	-2.339,-17.594,1.837,-5.489,-19.172,1.066,-6.412,-18.497,-2.470,-9.561,-17.275,-1.340,-10.822,-14.036,-2.617,-11.346,-11.603,0.313,-14.956,-11.219,1.478,-17.013,-8.772,-0.551,-17.707,-6.517,2.467,-13.926,-6.345,3.224,-13.113,-5.589,-0.442,-15.761,-2.805,-0.626,-14.552,-1.265,2.624,-10.928,-1.214,1.489,-12.165,0.219,-1.886,-13.939,3.039,0.038,-10.836,3.711,2.199,-8.615,3.757,-0.982,-10.902,6.339,-…	FSERIPPYDTTMELLHLSYDIYAYRGLSSCEEILHSNTTRPLPPDATCHMYETSLLDTQVMVVSRPPGKGGLAKGYVAAVYAGTDDFRNFFTDGDIIQTSFGTYANGTYPFVPKDHPDIEVHMGFNNAVFKHGLFDRVLETVQSVLKKHPHYQLVTTGHSLGASDSVLTSVAMSQKFGPDRNVLCINFGCPRTGNRAWRDYVNGLPNVGIWRFVNNIDIGNFVKSTALLFRYFFRSSTAHTHIDVVV
1DT3	MGYP000488620260	186	107	8	60	206	3	181	1	4.148e-06	187	269	218	VGDVTGFLALDNTNKLIVLSFRGSRSIENWIGN--LNFDLKEINDICSGCRGHDGFTSSWRSV---ADTLRQKVEDAVREHPDYRVVFTGHSLGGALATVAG---------------------------------ADLR-GNGYDIDVFSYGAPRVGNRAFAEFLTVQTGGTLYRITHTNDIVPRL	VHALVHFVTVDHSAQAVVLTCRGTLGLGDVLTDLMCEYQEFDHN--GSTYAAHGGMLEAAQLLAHQRGKVYDAVMRGLTLYPSYGLVLCGHSLGAGVASLLSVLWSEQRQLHQAHHPGAALALARDPVPFVTSSTSGLPRGRPIHCY--THGSPCVMSYELSDY-CGRGLVTSV--VHGYDIVPSL	4.717,-6.232,-19.391,6.577,-8.322,-17.123,5.185,-7.858,-13.847,8.040,-7.837,-11.706,7.926,-10.277,-9.118,7.334,-8.269,-6.158,8.798,-9.856,-3.213,6.146,-10.540,-0.694,6.202,-12.408,2.498,3.429,-13.253,4.993,4.401,-13.711,8.623,2.583,-13.906,12.002,3.530,-11.450,14.802,2.289,-13.141,18.053,3.183,-10.079,20.221,1.089,-7.696,18.071,-1.657,-10.381,17.425,-1.276,-9.768,13.661,-0.911,-11.468,10.301,1.64…	PKVHALVHFVTVDHSAQAVVLTCRGTLGLGDVLTDLMCEYQEFDHNGSTYAAHGGMLEAAQLLAHQRGKVYDAVMRGLTLYPSYGLVLCGHSLGAGVASLLSVLWSEQRQLHQAHHPGAALALARDPVPFVTSSTSGLPRGRPIHCYTHGSPCVMSYELSDYCGRGLVTSVVHGYDIVPSLSLGLLRDFKNVAVSLSQESSVAEDILSRIIGRYSGKK
1DT3	MGYP000489128722	256	156	14	1	234	1	235	1	6.854e-10	283	269	244	EVSQDLFNQFNLFAQYSAAAYCGKNNDAPAGTNITCTGNACPEVEKADATF-LYSFEDSGV----------GDVT--GFLALD--NTNKLIVLSFRGSRSIENWIGNLNFDLKEINDICSGCRGHDGFTSSWRSVADTLRQKVEDAVREHPDYRVVFTGHSLGGALATVAG----ADLRGNGYDIDVFSYGAPRVGNRAFAEFLTVQTGGTLYRITHTNDIVPRLPPREFGYSHS---SPEYWIKSGTLVPVTRND	MATLTPHQAVELALLAYDAKSMTSTKFV----NVQLPP-----VLAKDFDFSINSAPIQGVSGGFVSHLFGLS-TGFALLGHGKNRFKGDSVITIRGTDSIRDGLTDANFGLSGG---ENGQMVHAGFNKTFYTMKPQLEKFINANIRDRINGCVHLVGHSLGGALATLASDWICASY---SLPVKLYTFGSPRVGLSGFSQSATNRIEK-IYRCTHGADPVAQVPL--WPFSHAPYRGQEIRLDSG--QGLRPSA	-2.401,-4.334,19.140,-1.415,-7.307,16.949,1.231,-7.143,14.160,1.225,-9.119,10.924,3.909,-11.802,10.667,6.282,-11.372,7.652,4.516,-14.352,6.025,0.979,-12.822,6.472,2.174,-9.458,5.167,3.650,-11.097,2.000,0.498,-13.249,1.432,-1.660,-10.104,1.788,0.632,-8.245,-0.681,0.246,-11.153,-3.169,-3.555,-11.417,-2.509,-3.886,-7.736,-3.620,-3.153,-8.731,-7.271,-6.315,-10.921,-7.320,-8.225,-7.584,-7.056,-7.484,-…	MATLTPHQAVELALLAYDAKSMTSTKFVNVQLPPVLAKDFDFSINSAPIQGVSGGFVSHLFGLSTGFALLGHGKNRFKGDSVITIRGTDSIRDGLTDANFGLSGGENGQMVHAGFNKTFYTMKPQLEKFINANIRDRINGCVHLVGHSLGGALATLASDWICASYSLPVKLYTFGSPRVGLSGFSQSATNRIEKIYRCTHGADPVAQVPLWPFSHAPYRGQEIRLDSGQGLRPSAHKLEGNPGY
1DT3	MGYP000489352830	151	94	4	49	197	65	187	1	6.286e-05	159	269	189	ATFLYSFE--DSGVGDVTGFLALDNTNKLIVLSFRGSRSIENWIGNLNFDLKEINDICSGCRGHDGFTSSWRSVADTLRQKVEDAVREHPDYRVVFTGHSLGGALATVAGADLRGNGYDIDVFSYGAPRVGNRAFAEFLTVQTGGTLYRIT	AIIIKFIDDILNG---LQVVVVLNEDTRLIYVVFRCGNETQPWLVTNKSCKCNI---SSKISVHMGILELIEIHQISLFQTIDKLISEYPSFSICVTGYGLGGAISTLFG----------------------FMTAQRLSSTNNCQVTAIS	4.352,-15.829,17.132,3.504,-14.156,14.122,0.121,-15.387,13.652,-0.400,-16.838,10.395,-2.838,-14.798,9.019,-4.185,-16.247,6.068,-6.086,-14.049,3.890,-8.842,-16.034,2.211,-8.602,-16.780,-1.490,-11.249,-14.071,-2.135,-9.258,-11.438,-0.190,-6.154,-12.321,-2.249,-8.184,-11.939,-5.477,-9.568,-8.661,-4.157,-6.056,-7.389,-3.368,-4.908,-8.398,-6.886,-7.929,-6.709,-8.435,-7.087,-3.508,-6.567,-3.456,-3.788,…	MIGKTTLTYDEVITALAYSIWTSELSKRTTLHAENTSLAKSAGYQKLNSATEEATAYINRNQSSAIIIKFIDDILNGLQVVVVLNEDTRLIYVVFRCGNETQPWLVTNKSCKCNISSKISVHMGILELIEIHQISLFQTIDKLISEYPSFSICVTGYGLGGAISTLFGFMTAQRLSSTNNCQVTAISFG
1DT3	MGYP000491494143	291	175	11	3	250	51	333	1	1.317e-16	515	269	370	SQDLFNQFNLFAQYSAAAYC-------GKNNDAPAGTNITCTGNACPEVEKAD--ATFLYSFEDSGVGD-VTGFLALDNTNKLIVLSFRGSRSIENWIGNLNFDLKEI--------NDI--------CSGCRGHDGFTSSWRSVADTLRQKVEDAVREHPDYRVVFTGHSLGGALATVAGADLRGNGYDIDVFSYGAPRVGNRAFAEFLTV------------QTGGT-----LYRITHTNDIVPRLPPREFGYSHSSPEYWIKSGTLVPVTRNDIVKIEGIDATGGNNQP	TSDVFERLLYFSKVSAVVSCISDNSLIPDKTLKEGGCPAHLAFCSDEKINPTANRTRVELVLTA-GKGELGTGCLLVDHAREVVIIALRASTTRQDWLSDFTIYPTRWEPSSKGCYHDLVDSGAIRPCEGCKIHRGFYKFSETLAELFLDKIEHIFSKYPKYRLVITGHSLGAALASIAGIELKLRGYNPVVVTYANPLMFNSQMKEWVDDLFETESVDKHCRQHRRLDLRKGYFRVVHNEDYIPMVPP---NYKEAGIEIFIKK-KEVPHEITDLEYRG---TKGYYDEP	49.296,-8.256,-10.863,46.511,-6.106,-9.463,44.812,-3.883,-11.913,43.573,-0.751,-10.313,40.633,0.119,-12.258,40.369,3.815,-12.303,36.942,5.124,-11.780,36.457,8.095,-13.818,34.402,10.702,-12.213,31.427,11.106,-14.273,31.197,14.763,-14.269,27.682,15.403,-14.452,27.335,18.651,-16.174,24.525,20.221,-14.476,23.426,22.463,-17.024,22.099,25.275,-15.106,18.876,25.765,-16.613,18.006,29.082,-15.259,14.557,2…	MFGILRFAPLLFLIAAIQSATLPFSPTDLVKRSNDYGDNDEMKELQAVEFTSDVFERLLYFSKVSAVVSCISDNSLIPDKTLKEGGCPAHLAFCSDEKINPTANRTRVELVLTAGKGELGTGCLLVDHAREVVIIALRASTTRQDWLSDFTIYPTRWEPSSKGCYHDLVDSGAIRPCEGCKIHRGFYKFSETLAELFLDKIEHIFSKYPKYRLVITGHSLGAALASIAGIELKLRGYNPVVVTYANPLMFNSQMKEWVDDLFETESVDKHCRQHRRLDLRKGYFRVVHNEDYIPMVPPNYKEAGIEIFIKKKEVPHEITDLEYRGTKGYYDEPDSEEDLHVTSALLENGDWLHRKEHCSYFIFISGCAGF
1DT3	MGYP000492299596	217	120	12	1	205	34	195	1	0.002262	101	269	235	EVSQDLFNQFNLFAQ-YSAAAYCGKNN---------DAPAGTNITCTGNACPEVEKADATFLYSFEDSGVGDVTGFLALDNTNKLIVLSFRGSRSIENWIGNLNFDLKEINDICSGCRGHDGFTSSWRSVADTLRQKVEDAVREHPDYRVVFTGHSLGGALATVAGADLRGNGYDIDVFSYGAPRV--GNRAFAEFLTVQTGGTLYRITHTNDIVPR	PLSLHSEIVAYLLHQVYKPVSERPEETIGYKRLDEFDR----------------E-----F-----------I--SVFENEKTGELLVCVRGSKLDFQSIKD------DVKILA-------GFKAKSH----DLDEVLDALEEKFPEKKYDITGHSLGAAYILTELSEHQSHMDDIML--YNPGSSPFQDSDYLKELANNPGIQWFM--NRGDIVSH	15.984,-0.007,-23.786,17.334,3.001,-25.448,14.282,5.009,-24.806,14.255,4.148,-21.252,17.782,5.049,-20.730,17.328,8.267,-22.519,14.448,9.069,-20.379,16.372,8.439,-17.369,19.170,10.656,-18.565,16.806,13.397,-19.513,15.179,13.128,-16.243,18.437,13.298,-14.468,19.680,16.132,-16.552,16.532,17.966,-16.188,16.850,17.464,-12.700,20.373,18.630,-12.516,19.377,21.588,-14.410,16.672,22.314,-12.054,14.282,22.…	GLNEALHTVISEVSHLLGLDKLRDLVMGAPKAMPLSLHSEIVAYLLHQVYKPVSERPEETIGYKRLDEFDREFISVFENEKTGELLVCVRGSKLDFQSIKDDVKILAGFKAKSHDLDEVLDALEEKFPEKKYDITGHSLGAAYILTELSEHQSHMDDIMLYNPGSSPFQDSDYLKELANNPGIQWFMNRGDIVSHGLYQQFDNTTFQNNVHLAPYTYSPLTSHGLTQWYDESINK
1DT3	MGYP000494416920	208	114	10	1	201	2	169	1	1.772e-08	232	269	169	EVSQDLFNQFNLFAQYSAAAYCGKNNDAPAGTNITCTGNACPEVEKADATFLYSFEDSGVGDVTGFLALDNTNKLIVLSFRGSRSIENWIGNLNFDLKEIN-DICSGCRGHDGFTSSWRSVADTLRQKVEDAVREHP---DYRVVFTGHSLGGALATVAGADLRGNGYDI-DVFSYGAPRVGNRAFAE--FLTVQTGGTLYRITHTND	YCSQKSLEAW----------SCGEKCSADVSS----------------VTVCNGFK------TKAFVGKW--EGKCLVSFEGTSNIASFIKDLEFLQKAVSMDGCEGCKVHGGFLDEYNSLKQCVKSA----LSSTGCPTGSKIRSTGHSLGAAVNSIAMLDLSRAGWIIEESYDFGKPRVGNSNFAAAHNKLLTGKVWR--VTHAKD	6.237,-4.079,15.338,8.525,-6.690,14.435,6.861,-9.616,14.322,8.864,-12.196,12.957,7.625,-13.336,9.715,6.770,-16.549,11.353,4.961,-14.698,13.986,3.057,-12.980,11.498,2.325,-15.986,9.628,1.251,-17.593,12.639,-0.090,-14.458,13.844,1.541,-15.138,16.941,2.262,-11.775,18.034,1.452,-12.521,21.434,-1.601,-11.830,23.394,-2.243,-8.818,21.527,-2.901,-10.445,18.532,-4.792,-13.173,19.584,-7.837,-11.986,20.426,…	AYCSQKSLEAWSCGEKCSADVSSVTVCNGFKTKAFVGKWEGKCLVSFEGTSNIASFIKDLEFLQKAVSMDGCEGCKVHGGFLDEYNSLKQCVKSALSSTGCPTGSKIRSTGHSLGAAVNSIAMLDLSRAGWIIEESYDFGKPRVGNSNFAAAHNKLLTGKVWRVTHAKD
1DT3	MGYP000514642772	157	95	6	77	220	7	162	1	9.315e-10	314	269	229	VLSFRGSRSI--ENWIGNLNFDLKEI----NDICSGCRGHDGFTSS----WRSVADTLRQKVEDAVREHPDYRVVFTGHSLGGALATVAGADLRG--NGYDIDVFSYGAPRVGNRAFAEFLTVQTGGTLY-RITHTNDIVPRLPPREFGYSHSSPEY	VVVFRGTVITEPKNIFADLDIRLTDLTPVEGLDCTGCQVHNGFYQAFGKLQQKIFAQLAQFLKKKIDSNAVTEVNFTGHSLGGALATIGCYELSNWLKTVKVGIVTFGAPRVGNAAFKKVFDTKLNLKINARITYNKDPVPTV-PFTDKFAHCGTEY	-26.873,-2.792,10.732,-24.641,-2.869,7.857,-21.139,-2.819,8.712,-19.924,0.560,8.360,-16.857,0.638,6.269,-14.315,3.489,6.362,-12.123,3.996,3.308,-8.811,5.860,3.690,-7.692,7.134,0.225,-4.164,8.387,-0.291,-3.815,10.612,-3.265,-0.855,10.009,-5.577,0.868,12.758,-7.423,-0.779,14.268,-10.373,1.551,12.863,-12.699,2.208,14.231,-16.049,5.449,12.462,-15.861,6.011,9.508,-13.525,9.674,9.551,-14.356,10.352,12.…	SNPTVAVVVFRGTVITEPKNIFADLDIRLTDLTPVEGLDCTGCQVHNGFYQAFGKLQQKIFAQLAQFLKKKIDSNAVTEVNFTGHSLGGALATIGCYELSNWLKTVKVGIVTFGAPRVGNAAFKKVFDTKLNLKINARITYNKDPVPTVPFTDKFAHCGTEYNFADKDNFTGKNYLKDETLSAPTTTSALKEFANASDHSQYKTITEAKIKEVIQDNHTHIVSDMVKRK
1DT3	MGYP000514814289	291	147	13	1	239	8	270	1	3.585e-12	349	269	287	EVSQDLFNQFNLFAQYSAAAYCGKNNDAPAGTNITCTGNACPEVEK-----ADATFLYSFEDSGVGDVTGFLALDNTNKLIVLSFRGSRSIENWIGNL-NFDLKEINDICSGCRGHDGFTSSWRSVADTLRQKVEDAVREHPDYRVVFTGHSLGGALATVAGADLR--------------------------------GNG--------------YDIDVFSYGAPRVGNRAFAEFLTVQTGGTLYRITHTNDIVPRLPPREFGYSHSSPEYWIKSGTLVPVTRNDIVKIE	SYREQVALERW---RLNSLSYCS---------QQSLSKMTCPECVPFRTILSEVTAFS--EPSLS--LFGFVGLWKEQ-DLMIVFRASDDDINLIENLSSPILAPF-SVCDGCMASLTYLLMYATIRTRLLSIVLGKLKEHPEAKIHTTGHSLGGVFASFVAIDLRVNVAHYDYDEFLSSPHSYALFRGLTDVEYAFKPNSPVTRCKMAAHFIEIASVY--TFGMPRIGNEALATLIHDRIP-HFYRITHGRDLVPLLPPRQFDFVHTGDEYWYYNDTS-------LMRCS	-29.207,6.115,-5.625,-26.522,5.715,-3.172,-24.780,8.904,-2.970,-21.225,8.369,-2.945,-20.054,10.579,-0.535,-17.137,11.846,-2.147,-14.925,11.321,0.595,-12.853,14.277,0.217,-9.335,14.326,1.478,-9.356,15.165,5.211,-6.141,16.479,6.805,-7.137,15.058,10.243,-7.549,11.562,8.664,-4.139,11.932,6.939,-2.514,12.891,10.282,-4.217,9.937,11.959,-2.875,7.558,9.185,0.574,9.104,9.472,0.592,8.412,13.265,-0.552,4.80…	LLCSVNASYREQVALERWRLNSLSYCSQQSLSKMTCPECVPFRTILSEVTAFSEPSLSLFGFVGLWKEQDLMIVFRASDDDINLIENLSSPILAPFSVCDGCMASLTYLLMYATIRTRLLSIVLGKLKEHPEAKIHTTGHSLGGVFASFVAIDLRVNVAHYDYDEFLSSPHSYALFRGLTDVEYAFKPNSPVTRCKMAAHFIEIASVYTFGMPRIGNEALATLIHDRIPHFYRITHGRDLVPLLPPRQFDFVHTGDEYWYYNDTSLMRCSYPESGYCINSVTSPTRS
1DT3	MGYP000515519758	245	158	8	2	225	1	226	1	7.749e-10	310	269	252	VSQDLFNQFNLFAQYSAAAYCGKNNDAPAGTNITCTGNACPEVEKADATFLYSFEDSGVG------------------DVTGFLALDNTNKLIVLSFRGSRSIENWIGNLNFDLKEINDICSGCRGHDGFTSSWRSVADTLRQKVEDAVREHPDYRVVFTGHSLGGALATVAGADL---RGNGYDIDVFSYGAPRVGNRAFAEFLTVQTGGTLYRITHTNDIVPRLPPREFGYSHSSPEYWIKSG	MAFDASYALKVALPLARAAYN-VMDGSP---ANLPSG----------FVQTASIQVNPIVLAAMTTPHPTVAAMVKDTNIFGLMGRNAASRTAFVSFRGSADLSDWLADFDAEPTAYTPISGFGQVESGFQSVYQLVRKSIVDNLATASAGCD--QILVTGHSLGAALDVLAAPDIFRNMPPNIEPRLITFAGPRVGLNDFASAFNALIE-SCFRVVNFLDIVPHVPLAP--YVHVGVEIAVDSG	-15.875,5.712,8.338,-14.115,8.717,9.699,-10.256,8.675,9.864,-9.098,7.380,13.287,-5.563,8.806,13.917,-5.161,6.513,17.008,-6.004,3.394,14.860,-3.604,4.587,12.153,-0.821,5.087,14.769,-1.421,1.882,16.821,-2.469,-0.617,14.114,-1.931,0.492,10.452,1.577,2.017,10.840,2.913,-0.957,12.913,1.510,-3.361,10.250,3.225,-1.310,7.494,6.464,-1.547,9.531,5.963,-5.327,10.057,6.020,-5.742,6.204,9.642,-4.416,6.191,10.…	MAFDASYALKVALPLARAAYNVMDGSPANLPSGFVQTASIQVNPIVLAAMTTPHPTVAAMVKDTNIFGLMGRNAASRTAFVSFRGSADLSDWLADFDAEPTAYTPISGFGQVESGFQSVYQLVRKSIVDNLATASAGCDQILVTGHSLGAALDVLAAPDIFRNMPPNIEPRLITFAGPRVGLNDFASAFNALIESCFRVVNFLDIVPHVPLAPYVHVGVEIAVDSGGKIDVGWRHSLDAYQVGLTDLVASPQ
1DT3	MGYP000517495909	159	102	11	49	193	11	156	1	0.0001911	129	269	157	ATFLYSFEDSGVGDVTGFLALDNTNKLIVLSFRGSRSIENWIGNLNFDLKEINDICSGCRGHDGFTSSWRSVADTLRQKVEDAVREHPDYR--VVF--TGHS-LGGALATVAGADLRGN-----GYDIDV-FSYGAPRVGNRAFAE--FLTVQT-GGTL	LANMMVSESS----IFGLVAWNPATRTAIVTIRGTKPIWDWIADIDAIPLPYLSDPSVGLVHMGFQLVYEHI----RLSIADLLS--ANCQGALTIWVIGHSLVGGALAVLGAFDIFKNVKLGPAPQLYTLAG---PRTRAPDFAASFAAAIPTCNRIV	-33.201,-15.358,9.531,-29.941,-17.087,10.043,-27.716,-15.036,12.211,-24.874,-13.917,10.130,-22.141,-15.841,11.372,-20.460,-13.321,13.314,-17.433,-14.651,12.092,-18.206,-13.641,8.764,-15.534,-11.823,7.200,-16.766,-8.767,5.797,-15.399,-8.521,2.400,-15.292,-5.348,0.602,-14.069,-5.320,-2.917,-12.108,-2.499,-4.365,-12.033,-2.413,-8.026,-10.427,0.376,-9.697,-11.742,-0.120,-13.032,-9.412,2.014,-15.030,-…	MAAADPNHQRLANMMVSESSIFGLVAWNPATRTAIVTIRGTKPIWDWIADIDAIPLPYLSDPSVGLVHMGFQLVYEHIRLSIADLLSANCQGALTIWVIGHSLVGGALAVLGAFDIFKNVKLGPAPQLYTLAGPRTRAPDFAASFAAAIPTCNRIVN
1DT3	MGYP000518658561	215	121	12	1	208	26	194	1	4.583e-07	233	269	250	EVSQDLFNQFNLFAQYSAAAYCGKNNDAPAGTNITCTGNACPEVEKADATFLYSFEDSGVGDVTGFLALDNTNKLIVLSFRGSRSIENW-IGNLNFDLKEINDICSGCRGHDGFTSSWRSVADTLRQKVEDAVREHPDYRVVFTGHSLGGALATVAGADLRGNGYDIDVFSYGAPRVGNRAFAEFLTVQTG------GTLYRITHTNDIVPRLPP	TMHP----ELPRAAALSLSAY-----------------SDMPGQ------FGHKFE-NKFTSTTFWWIE---GEKDYLVFKGSAEPRDFFIDILAFPPVRY--L--RNWVHPGFALAHKSI-KPRLLKILRKIKS-QNKQLVITGHSLGAAQAELTHLMALSQGIDSTAICFGKPRAFL---------KRSKSRFPKGSILSVVSGSDIVTRVPR	39.403,0.298,-13.426,36.921,-1.732,-15.388,33.363,-0.754,-16.073,31.456,-3.828,-15.912,28.792,-3.412,-18.453,25.892,-3.791,-16.362,23.189,-4.345,-18.679,22.151,-7.660,-19.653,20.632,-7.375,-23.028,17.000,-7.565,-22.407,16.666,-7.759,-25.958,15.433,-10.854,-26.889,12.321,-11.722,-25.425,9.898,-10.622,-27.893,8.711,-13.619,-29.298,6.415,-15.416,-27.428,3.035,-15.111,-28.386,2.397,-17.310,-25.741,-1…	MGRADLDPPFADMRRGTGIYPHRETTMHPELPRAAALSLSAYSDMPGQFGHKFENKFTSTTFWWIEGEKDYLVFKGSAEPRDFFIDILAFPPVRYLRNWVHPGFALAHKSIKPRLLKILRKIKSQNKQLVITGHSLGAAQAELTHLMALSQGIDSTAICFGKPRAFLKRSKSRFPKGSILSVVSGSDIVTRVPRYCYTYGCQDQDLLYLSNHDTVYLNPDMDFVADDFSVSDSISDHSMEHYSQRCGGFK
1DT3	MGYP000518835680	189	112	13	58	225	19	177	1	0.0006181	103	269	193	SGVGDVT-----G----FLALDNTNKLIVLSFRGSRS----IENWIGNLNFDLKEINDICSGCRGHDGFTSSWRSVADTLRQKVEDAVREHPDYRVVFTGHSLGGALATVA---GADLRGNGYDIDVFSYGAPRVGNRAF-----AEFLTVQTGGTLYRITHTNDIVPRLPPREFGYSHSSPEYWIKSG	AEIGDWVRDSSIGDDKFTVWVDRDDDRVHVALRGTKATTADIGSDMH---------ILMNNK----SGNE-------QEIYEYLERVQEKYPEYVLDASAHSLGANQLLEVFENHKDL--DYDRINL--FAPGT--NPMWGLDDSKDAVKDD---RFYFYLNSGDAVSNTF-VSLLPSEREHVYWAKPS	5.605,1.691,11.799,3.521,-1.447,11.820,2.065,-0.766,8.346,5.595,-0.455,6.907,6.492,-3.782,8.629,3.406,-5.418,7.169,4.228,-4.109,3.639,7.817,-5.372,4.111,6.338,-8.907,4.775,4.699,-8.826,1.296,8.244,-8.845,-0.250,9.251,-12.085,1.538,8.614,-15.445,0.068,5.317,-16.865,1.232,7.023,-19.401,3.485,9.293,-16.779,5.019,6.563,-14.475,6.153,6.007,-14.052,9.827,2.735,-15.053,11.360,2.475,-11.988,13.590,3.479,…	QEYAQIVQQSYKEKDNRTAEIGDWVRDSSIGDDKFTVWVDRDDDRVHVALRGTKATTADIGSDMHILMNNKSGNEQEIYEYLERVQEKYPEYVLDASAHSLGANQLLEVFENHKDLDYDRINLFAPGTNPMWGLDDSKDAVKDDRFYFYLNSGDAVSNTFVSLLPSEREHVYWAKPSHNPLTNHGIQQWVDTV
1DT3	MGYP000518905856	224	139	10	7	224	15	211	1	8.259e-12	364	269	268	FNQFNLFAQYSAAAYCGKNNDAPAGTNITCTGNACPEVEKA-DATFLYSFEDSGVGDVTGFLALDNTNKLIVLSFRGS--RSIENWIGNLNFDLKEINDICSGCRGHDGFTSSWRSVADTLRQKVEDAVREHPD--YRVVFTGHSLGGALATVAGADLRGNGYDI-DVFSYGAPRVGNRAFAEFLTVQTGGTLYRITHTNDIVPRLPPREFGYSHSSPEYWIKS	YANALFLAKCAQLAYQPPE-----------AIHTQMMKWGIPHVAFF-----DRQG-TQAFVLGH--DDFIVVAFRGTEPRSLKDWMTDKQIIRKRGPY----GKVHRGFLKSVNTV----WNDIQNAIMSFQDKGQSLWFTGHSLGAALATLAVAKMGEDAKPVHGLYTFGQPRVGGKTFARNFNLDFKAQTFRFVNNSDIVTRVPRRVLGYRDVGQVLYFDS	3.008,-2.639,25.512,-0.414,-1.529,24.883,-1.856,-2.121,21.519,-1.445,0.748,19.209,-4.516,2.784,18.998,-6.558,1.800,15.954,-9.875,3.236,14.826,-11.419,0.367,12.868,-14.826,1.920,11.940,-13.745,4.943,9.932,-13.079,5.585,6.254,-11.425,8.925,7.132,-7.694,9.430,7.491,-6.502,8.802,11.092,-2.970,9.243,12.188,-3.180,6.261,14.598,-4.407,4.054,11.680,-1.533,5.365,9.502,1.067,4.507,12.140,-0.481,1.029,12.87…	MPSPAFFPHTTKYRYANALFLAKCAQLAYQPPEAIHTQMMKWGIPHVAFFDRQGTQAFVLGHDDFIVVAFRGTEPRSLKDWMTDKQIIRKRGPYGKVHRGFLKSVNTVWNDIQNAIMSFQDKGQSLWFTGHSLGAALATLAVAKMGEDAKPVHGLYTFGQPRVGGKTFARNFNLDFKAQTFRFVNNSDIVTRVPRRVLGYRDVGQVLYFDSAGMLHDDVHWWNQFLDRIKGHVDDLGKVGTDGLKDHSMVKYVKNLKHKDNRSFLVSS
1DT3	MGYP000520336548	185	119	6	64	234	75	257	1	2.503e-09	298	269	272	TGFLALDNTNKLIVLSFRGSRSIENWIGNLNFDLKEINDICSGCRGHDGFTSSWRSVADTLRQKVEDAVREHPDY-RVVFTGHSLGGALATVAGADLRGN-------GYDIDVFSYGAPRVGNRAFAEFLTVQTGGTLYRITHTNDIVPRLPPREFG---YSHSSPEYWIKSGTLV---PVTRND	EPFALIASNKTQVFVVFRGTESTEDWLVDGNADQTTYNLVKHYGKVHEGFFKLYKSIRESLLETLKNAL-ANTDIKQLFITGHSLGSGLSTLAVPDILNQPFIINNTTLTIDHFNLASPRVGDPEFTSALN-QGRANNYRVVNTSDIVPTLPPSILGRDLYQHIGTAVTFTAQYGTYAGNHNALN	-2.978,8.319,33.810,-4.106,7.018,30.553,-3.323,3.364,30.474,-1.326,2.515,27.500,-3.272,0.285,25.233,-2.408,-3.321,25.472,-0.475,-4.288,22.467,-1.572,-7.541,20.965,1.236,-9.898,20.336,2.463,-9.842,16.834,0.680,-12.244,14.547,2.706,-14.664,12.562,3.061,-14.037,8.789,-0.036,-15.515,7.050,0.685,-16.607,3.438,-3.095,-16.867,2.591,-3.660,-13.175,3.703,-0.505,-12.122,1.787,-1.753,-13.907,-1.422,-5.226,-…	MTSMPILLPPQPFDLVNCVTCSDLVNISYDMYSDWVSADKPAQKDFHWKPPCSDFTFSPIIWGETKELWIFRNAEPFALIASNKTQVFVVFRGTESTEDWLVDGNADQTTYNLVKHYGKVHEGFFKLYKSIRESLLETLKNALANTDIKQLFITGHSLGSGLSTLAVPDILNQPFIINNTTLTIDHFNLASPRVGDPEFTSALNQGRANNYRVVNTSDIVPTLPPSILGRDLYQHIGTAVTFTAQYGTYAGNHNALNSYHYALKNTQQPAAE
1DT3	MGYP000520499568	228	136	9	2	206	86	288	1	8.324e-07	227	269	299	VSQDLFNQFNLFAQYSAAAYCGKNNDAPAGTNITCTGNACPEVEKADATFLYSFEDSGVGD-----------VTGFLALDNTNKLIVLSFRGSRSIENWIGNLNFDLKEINDICSG--CRGHDGFTSSWRSVADTLRQKVEDAVREHPDYRVVFTGHSLGGALATVAGADLRGNGY----DIDVF-SYGAPRVGN-----RAFAEFLTVQTGGTLYRITHTNDIVPRL	IQKKNLKDEIILAQYANGIYSK--TKPPG--------------------LIKLFKEQHIVDKESGKGTKLLIPVYGIFKNAETKSIILAIRGTATPQDALIDGLATTKSI--FLDGNKYYAHAGFLKASSYIANETASQLKELLNENPGYTLTVTGHSLGGATATITGILLFDKHFNRSTPV-NICGFASGTSFAAQENGKALEQYLKEYPILTISTFVYENDIVPRL	9.025,9.853,8.300,9.538,11.203,4.960,12.818,12.701,5.670,12.825,15.963,3.852,14.294,16.065,0.702,14.725,19.737,1.109,16.077,20.410,-2.183,13.713,22.114,-4.390,12.948,19.597,-6.709,12.629,21.109,-9.887,9.245,22.034,-10.647,8.639,19.889,-13.421,6.226,21.605,-15.370,3.273,19.742,-15.761,4.598,18.609,-18.947,7.375,16.448,-18.363,5.868,13.577,-17.145,7.314,10.482,-18.491,4.218,9.068,-19.694,5.698,6.06…	IAGGYGKEVPNFGKDQSISSLAQLKTALESKFAGQYALMLREASGAGDIFYGFKINDNKLILSSAAYLLAKSYKFSKEKHTNNNFIQKKNLKDEIILAQYANGIYSKTKPPGLIKLFKEQHIVDKESGKGTKLLIPVYGIFKNAETKSIILAIRGTATPQDALIDGLATTKSIFLDGNKYYAHAGFLKASSYIANETASQLKELLNENPGYTLTVTGHSLGGATATITGILLFDKHFNRSTPVNICGFASGTSFAAQENGKALEQYLKEYPILTISTFVYENDIVPRLSAFEMSTFLAT
1DT3	MGYP000524516904	255	141	11	1	211	43	252	0.353	0.1927	46	269	336	EVSQDLFNQFNLFAQYSAAAYCGKNNDAPAGTNITCTGNACPEVEKADATFLYSFEDSGVGDVTGFLALDNTNKL--------------------------------IVLSFRG-----SRSIENWIGNLNFDLKEINDICSGCRGHDGFTSSWRSVADTLRQKVEDAVREHP--DYRVVFTGHSLGGALATVAGADLRGNGYDIDVFSYGA-----PRVGNRAFAEFLTVQTGGTLYRITHTNDIVPRLPPREF	EPNPDASL------QADLARALESTTEIVW-------------------------LEAGDKQSLALFEPHNTREQLGNVLILHDQRTSADWPELVSTLRTGLPDKGWATLSLQLPSPPHTPLPQRTSNNAKPAADGSGDTTDT------TTADSTYD-QRLAQIADAAFSYLQEREGKLVVLGIGSGATWATTFVRAREQSSQELSLVMVDSQQPEHPQAPDL--MTLLPELS-STVLDLYHGS----TLDENRV	-12.937,8.370,40.062,-14.524,11.076,37.662,-12.013,12.721,35.356,-12.025,16.556,35.726,-12.950,18.266,32.391,-10.492,21.105,32.006,-11.975,23.579,29.483,-9.183,25.558,27.927,-10.193,29.331,27.390,-9.670,30.477,23.784,-8.291,34.145,23.825,-9.616,35.785,20.549,-7.067,38.561,19.908,-8.685,40.817,17.226,-5.765,42.734,15.596,-7.338,45.499,13.507,-4.618,46.731,11.180,-5.577,50.202,9.764,-6.756,50.826,6…	MKPRIITPLLALSLFSAPLKAADEAPAGTPASPVTTTPGTRVEPNPDASLQADLARALESTTEIVWLEAGDKQSLALFEPHNTREQLGNVLILHDQRTSADWPELVSTLRTGLPDKGWATLSLQLPSPPHTPLPQRTSNNAKPAADGSGDTTDTTTADSTYDQRLAQIADAAFSYLQEREGKLVVLGIGSGATWATTFVRAREQSSQELSLVMVDSQQPEHPQAPDLMTLLPELSSTVLDLYHGSTLDENRVANPRSRINLAKRNKLDNYHHSRLPLLPGDRKKRNQWVLSRVRGFMQTYIVDAAEEENPKERRRYSGPKNENGPGQNTGMMDKSI
1DT3	MGYP000527561618	180	113	7	49	224	2	164	1	4.46e-10	329	269	214	ATFLYSFEDSGVGDVTGFLALDNTNKLIVLSFRGSRSIENWIGNLNFDLKEINDICSGCRGHDGFTSSWRSVADTLRQKVEDAVREHP---DYRVVFTGHSLGGALATVAGADLRGNGYDI-DVFSYGAPRVGNRAFAEFLTVQTGGTLYRITHTNDIVPRLPPREFGYSHSSPEYWIKS	EVFL------STNGTQVWLVNE--SDAVYVIFRGT-SYEDFVTDLKVRKEQT----DFGKVHRGFLAYVNHV----AHMVEKQLYQWSPFRDKPIILTGHSLGAAAAVIQACYLHRLGFNIEGVYTFGEPRAGNRPFASYADDAFGDVHYRHVNGLDGVPMIPFIAWYYWHSGKRFYFST	-23.046,-2.583,1.317,-20.784,0.273,0.598,-19.245,3.116,2.622,-17.260,6.082,1.318,-14.994,7.788,3.881,-13.425,11.192,3.127,-11.459,13.349,5.588,-8.604,15.858,5.099,-8.022,14.662,1.494,-7.817,11.007,2.558,-10.356,8.837,0.677,-11.263,5.233,1.515,-13.918,3.018,0.016,-15.226,0.088,2.066,-17.229,-2.661,0.236,-18.985,-5.395,2.242,-19.672,-8.473,0.142,-20.871,-11.934,1.173,-17.371,-13.425,1.420,-15.083,-…	DEVFLSTNGTQVWLVNESDAVYVIFRGTSYEDFVTDLKVRKEQTDFGKVHRGFLAYVNHVAHMVEKQLYQWSPFRDKPIILTGHSLGAAAAVIQACYLHRLGFNIEGVYTFGEPRAGNRPFASYADDAFGDVHYRHVNGLDGVPMIPFIAWYYWHSGKRFYFSTHRQYLVRNAPLCQVVIERLPILLKEPWRWVAHKKFDHDVFNYVAACHKNL
1DT3	MGYP000532823138	293	170	20	8	262	112	372	1	7.076e-11	322	269	389	NQFNLFAQYSAAAYCGKNNDAPAGTNITCTGNACPEVE----KADATFLYSFEDSGV---GDVTGFLALDNTNKLIVLSFRGSRSIENWI----GNLNFDLKEINDICSGCRGHDGFTSS-WRSVADTLRQKVEDAVREHPDYRVVFTGHSLGGALATVAG-----------ADLRGNGYDIDVFSYGAPRVGNRAFAEFLTVQTGGTLYRITHTNDI--VPRLPP----REFG-YSHSSPEYWI-KSGTLVPVTRNDIVKIEG--IDATG-GN--NQPNIPD--IPAHLWYF	EVSMKMLYLSAVAY------AP--------SHKQECLEKVLPSEKFQLQRVVTTKCDILENECSGYVAVSHALKAVVVAFRGSEKFEQAIVEFLESFLTREESF----LNGKVQFYWKRAFFLLWPSMETEA-KALVVKNPSYQIWVTGHSLGATLASLASTWLAYHNIAPRKN-------IILYTFGMPRVGNYKYALQHDQLVNNS---WRVVNDIDLVPHFPTVFSLSVLNGPYHHGVEVFYSQEATSVHSP---HKECHGKPYNEDFTCSFFKFKVITSKSIERHQTYF	-3.152,0.115,-50.040,-3.627,1.445,-46.525,-3.056,5.137,-45.782,-1.386,5.960,-42.317,-2.983,9.144,-41.406,-0.569,10.951,-39.059,-2.627,13.391,-37.203,-0.271,16.039,-35.948,-1.140,17.125,-32.512,-0.249,20.783,-32.403,1.262,21.854,-29.004,-0.909,24.627,-28.054,1.126,26.871,-25.651,-1.064,27.700,-22.800,0.977,30.342,-21.167,-0.989,31.358,-18.245,0.403,34.770,-17.326,-0.362,35.686,-13.854,-0.092,39.56…	MLGSSETAFTEGDLTVQYPIRSCSTKPKTKMFRHVLLGFIVFLPQLIVVVAHLCSANNCADCVSSRFIQCRWCKRDNKCHAPGADAASPCSTEESVVHNSHCEDEVPHYDPEVSMKMLYLSAVAYAPSHKQECLEKVLPSEKFQLQRVVTTKCDILENECSGYVAVSHALKAVVVAFRGSEKFEQAIVEFLESFLTREESFLNGKVQFYWKRAFFLLWPSMETEAKALVVKNPSYQIWVTGHSLGATLASLASTWLAYHNIAPRKNIILYTFGMPRVGNYKYALQHDQLVNNSWRVVNDIDLVPHFPTVFSLSVLNGPYHHGVEVFYSQEATSVHSPHKECHGKPYNEDFTCSFFKFKVITSKSIERHQTYFSIPVGTFYKSGCVPPTR
1DT3	MGYP000533689238	227	122	13	3	220	65	263	1	3.186e-11	356	269	351	SQDLF--------NQFNLFAQYSAAAYCGKNNDAPAGTNITCTGNACPEVEKADATFLYSFEDSGVGDVTGFLALDNTNKLIVLSFRGSRSIENWIGNLNFDLKEINDICSGCRGHDGFTSSWRSVADTLRQKVEDAVREHPDYRVVFTGHSLGGALATVAGADLRGNGYDI-DVFSYGAPRVGNRAFAEFLTVQTGGTLYRITHTNDIVPRLPPREFGYSHSSPEY	SLDALAGNEFTWQNALNM-ALCSHVAY-RTATDA---TRIA------RNRLH----FDTCQPIAAS-GTEGFVAA--TPEAVVVAFRGTQQTADWLINLNVSWTNA----RYGAVHRGFHDAFQSVRTVLEEALADAHAD--ARPVLITGHSLGGALATIAAAEWHGR-YPIAGIYTFGQPAVGFSAFRSHIAVRYRHAFHRVVNDDDIVARVPP---GYRHVGRLY	-11.812,-43.922,-4.691,-10.739,-40.450,-3.559,-8.906,-38.544,-6.140,-6.363,-36.309,-4.549,-6.163,-32.894,-6.051,-3.132,-32.601,-8.268,-1.184,-29.682,-7.007,-0.174,-27.827,-10.016,2.802,-25.878,-9.092,3.091,-23.264,-11.595,6.517,-22.224,-11.553,6.608,-19.438,-13.730,10.195,-19.049,-14.148,10.381,-15.578,-14.556,13.899,-15.786,-15.712,14.555,-12.372,-16.932,18.153,-12.828,-17.860,18.914,-9.437,-19.…	MSQEPSSFAWTIPLQVSVSIGGPIPSAPPNPSAPPVPAGRERVTAEGMFGRRVEDVFERAVRQFSLDALAGNEFTWQNALNMALCSHVAYRTATDATRIARNRLHFDTCQPIAASGTEGFVAATPEAVVVAFRGTQQTADWLINLNVSWTNARYGAVHRGFHDAFQSVRTVLEEALADAHADARPVLITGHSLGGALATIAAAEWHGRYPIAGIYTFGQPAVGFSAFRSHIAVRYRHAFHRVVNDDDIVARVPPGYRHVGRLYHFTAGEVRHETLMASPGTDAAPASVADDTPTMTRAEFEQLKGQLQAARTVAPAAVNESLHADVTLEGFFPSVSDHSLDRYIGKIFDHV
1DT3	MGYP000539466709	207	128	13	1	193	25	208	1	3.098e-07	217	269	210	EVSQDLFNQFNLFAQYSAAAYCGKNNDAPAGTNITCTGNACPEVEKADATFLYSFEDSGVGDVTGFLALDNTNKLIVLSFRGSR--SIENWIGNLNFDL-KEINDI----CSGCRGHDGFTSSWRSVADTLRQKVEDAVREHPDYRVVFTGHSLGGALATVAGADLRGNG----YDIDV-FSYGAPRVGNRAFAE--FLTVQTGGTL	PVDERLLSQAVSLTQQT---YC---FVQPIG---QKVGD---------AELLYEYGDGNIN-QRAAIFHSKSL-GIAVAFEGTEILSILSILHDVDFWPVDPTNALKDAVPAGTKLFKGFHSAYQNVAKPVFKNLKRIISERNETRVTVIGYSLGAAMAAMAAMEYQHRLEHGVHQVFAFGL---PRTGNPTFANAVDDKLGGKFFY	19.030,-2.296,-41.352,18.701,-5.530,-39.515,15.298,-6.412,-38.172,15.658,-8.269,-35.026,12.800,-10.575,-34.752,11.748,-10.844,-31.264,10.557,-14.243,-30.460,7.455,-14.348,-28.352,7.633,-17.389,-26.340,4.267,-18.802,-25.676,3.001,-18.577,-22.227,3.687,-21.654,-20.331,0.632,-23.386,-18.965,-0.439,-21.762,-15.826,-0.003,-24.007,-12.987,-3.176,-25.542,-12.037,-4.201,-23.345,-9.418,-5.247,-25.430,-6.6…	LSILAAVIAAPTSAPSSTQAGRPNPVDERLLSQAVSLTQQTYCFVQPIGQKVGDAELLYEYGDGNINQRAAIFHSKSLGIAVAFEGTEILSILSILHDVDFWPVDPTNALKDAVPAGTKLFKGFHSAYQNVAKPVFKNLKRIISERNETRVTVIGYSLGAAMAAMAAMEYQHRLEHGVHQVFAFGLPRTGNPTFANAVDDKLGGKFFYAV
1DT3	MGYP000549934804	229	135	11	9	234	5	184	1	9.419e-07	201	269	198	QFNLFAQYSAAAYCGKNNDAPAGTNITCTGNACPEVEKADATFLYSFEDSGVGDVTGFLALDNTNKLIVLSFRGSRSIENWIGNLNFDLK-EINDICSGCRGHDGFTSSWRSVADTLRQKVEDAVREHPDYRVVFTGHSLGGALATVAGADLRGNGYDI-DVFSYGAPRVG-NRAFAEFLTVQTGGTLYRITHTNDIVPRLPPREFGYSHSSPEYWIKSGTLVPVTRND	KYAIIARDSYILPC--NIGQQDSAS----------------RAI------ILTN----------DDGLVVAIPGTDNIACFLADLDIELETHI----GMGVLHRGFCDAFLDIGDELLK---------LNPD-VITAHSLGAAIALIYAASLCLCGKPPKAVYAFEPPRISIDNTIAQLL-ASNGVDLHLTRFGEDIVTQVPRLIHSWQHPSPLTAIGNAHFPFCNVED	-7.512,2.299,15.670,-3.822,1.719,16.615,-1.210,2.466,13.829,1.490,0.410,15.670,-0.803,-2.704,15.589,-1.178,-2.466,11.831,2.510,-1.543,11.238,3.401,-4.814,13.057,0.928,-6.773,10.907,2.333,-5.156,7.723,5.884,-6.020,8.858,4.954,-9.634,9.764,3.357,-10.096,6.284,6.954,-10.431,4.857,7.777,-13.573,6.988,4.357,-15.191,7.401,3.109,-17.823,4.921,0.894,-16.122,2.368,-2.742,-16.995,1.991,-3.034,-15.431,-1.47…	MDPLKYAIIARDSYILPCNIGQQDSASRAIILTNDDGLVVAIPGTDNIACFLADLDIELETHIGMGVLHRGFCDAFLDIGDELLKLNPDVITAHSLGAAIALIYAASLCLCGKPPKAVYAFEPPRISIDNTIAQLLASNGVDLHLTRFGEDIVTQVPRLIHSWQHPSPLTAIGNAHFPFCNVEDHSIDNIVEYYSANQ
1DT3	MGYP000553360222	222	140	9	2	217	6	196	1	1.12e-09	287	269	248	VSQDLFNQFNLFAQYSAAAYCGKNNDAPAGTNITCTGNACPEVEKADATFLYSFEDSGVGDVTGFLALDNTNKLIVLSFRGSRSIENWIGNLNFDLKEINDICSGCRGHDGFTSSWRSVADTLRQKVEDAVREH---PDYRVVFTGHSLGGALATVAGADLRGNGYDI-DVFSYGAPRVGNRAFAEFLTVQTGGTLYRITHTNDIVPRLP--PREFGYSHSS	IKYNPKDAYNLAKLCSLAYRFNSKTVKD---------------KENNYYLIE------VKNNRCLVVYN--SEVCILVFPGTDSFEDVVTDLKIKGVSL---GDNIYVHKGFLETSR----VLITELSDFFEKNSFLKDRKIWITGHSLGAAQAVLV-AYLMSELKDFQGIYSFAQPKIGNKEFCNVASTYFGKRYYRIVNFLDPVPLVPTQNNDFKYEHIK	-26.975,-1.635,2.083,-25.181,1.264,0.828,-21.964,1.215,2.772,-21.348,4.557,4.265,-19.005,6.321,1.959,-16.027,7.020,4.045,-14.482,10.315,3.105,-10.725,11.077,3.224,-9.777,12.032,6.780,-6.422,13.912,7.395,-6.371,12.534,10.978,-6.583,8.920,9.689,-3.933,9.686,7.050,-1.615,11.053,9.737,-2.194,8.102,12.149,-1.796,5.483,9.350,1.428,7.156,8.154,2.788,6.860,11.783,1.838,3.151,11.740,3.818,2.723,8.499,6.86…	MQANIIKYNPKDAYNLAKLCSLAYRFNSKTVKDKENNYYLIEVKNNRCLVVYNSEVCILVFPGTDSFEDVVTDLKIKGVSLGDNIYVHKGFLETSRVLITELSDFFEKNSFLKDRKIWITGHSLGAAQAVLVAYLMSELKDFQGIYSFAQPKIGNKEFCNVASTYFGKRYYRIVNFLDPVPLVPTQNNDFKYEHIKGEKIEYKSSEYIGKNIRIERENIIRSLFLLASYPINHSIDIYIQKAKKDLNN
1DT3	MGYP000555732259	243	138	13	1	237	5	207	1	2.271e-10	326	269	251	EVSQDLFNQFNLFAQYSAAAYCGKNNDAPAGTNITCTGNACPEV---EKADATFLYSFEDSGVGDVTGFLALDNTNKLIVLSFRGSR--SIENWIGNLNFDLKEINDICSGCRGHDGFTSSWRSVADTLRQKVEDAVREHPDYRVVFTGHSLGGALATVAGADLRGNGYDIDVFSYGAPRVGNRAFAEFLTVQTGGTLYRITHTNDIVPRLPPREFG-YSHSSPEYWIKSGTLVPVTRNDIVK	TINWDL---AELCAWICEYAY----ED----------TDAMKKFLTDKKIKHTNLKFFE---VDNAQAYGITM--HDYIIIAFRGTEPTQFSDIIADIKAWPA---DAETKGHVHSGFKGELDKLYPNIRKWLGKKVTT---KKLVITGHSLGAAMATICTSRFHALGANQVLYTYGCPRTGNKEWGEQFKD---IEAYRFVNNNDIVPQVPP--FGYYHHVGELYYMSY-------TNKISN	6.005,-22.380,3.296,2.456,-23.258,2.692,1.208,-21.190,-0.071,-0.892,-18.775,1.722,-4.091,-18.270,-0.076,-4.867,-14.557,-0.680,-8.298,-13.367,0.608,-9.582,-11.578,-2.519,-12.617,-10.001,-0.786,-10.217,-8.433,1.735,-7.880,-7.440,-1.155,-10.771,-5.630,-2.944,-11.933,-4.021,0.348,-8.379,-2.747,1.024,-8.099,-1.369,-2.526,-11.424,0.516,-2.066,-10.375,1.815,1.364,-7.070,3.024,-0.243,-9.021,4.913,-2.937,…	MKNKTINWDLAELCAWICEYAYEDTDAMKKFLTDKKIKHTNLKFFEVDNAQAYGITMHDYIIIAFRGTEPTQFSDIIADIKAWPADAETKGHVHSGFKGELDKLYPNIRKWLGKKVTTKKLVITGHSLGAAMATICTSRFHALGANQVLYTYGCPRTGNKEWGEQFKDIEAYRFVNNNDIVPQVPPFGYYHHVGELYYMSYTNKISNNMSYFQRLKDKISGRCRAWSKFQFFDNLYDHLGAHYIKKIISRK
1DT3	MGYP000555965236	233	138	12	1	222	25	231	1	1.526e-11	354	269	289	EVSQDLFNQFNLFAQYSAAAYCGKNNDAPAGTNITCTGNACPEVEKAD-----ATFLYSFEDSGVGDVTGFLALDNTNKLIVLSFRGSR--SIENWIGNLNFDLKEINDICSGCRGHDGFTSSWRSVADTLRQKVEDAVREHPDYR-VVFTGHSLGGALATVAGADLRGNGYDIDVFSYGAPRVGNRAFAEFLTVQTGGTLYRITHTNDIVPRLPPR--EFG-YSHSSPEYWI	SVSFDI---YKLCAEMSRLAY----TDDN---------NDTRQGLT-DIGYSTIKWISVLD------NQALLAWNSEEKIGIISFRGTEPDDTGDIATDLSMSLIPHPDPTKG-RIHRGFYQAFNDLKPDIDDWINKIERSNPEIEKWLITGHSLGAAMATIAASVLNFSQGSKRLINFGSPRVGDVDFVR--AFPAGIEYRRYVNCCDVVCRVPPAISGVGDYDHLPNEYYI	0.208,-15.115,-19.583,2.900,-14.025,-17.356,4.938,-17.030,-16.581,6.979,-16.370,-13.664,9.812,-18.711,-13.227,8.199,-21.791,-13.478,8.924,-21.510,-10.068,6.486,-18.797,-9.786,3.957,-19.758,-12.143,1.911,-20.806,-9.368,1.408,-17.346,-8.524,-0.923,-16.705,-11.202,-4.362,-17.534,-10.668,-6.544,-16.495,-13.401,-9.689,-15.919,-11.638,-8.453,-15.055,-8.517,-9.640,-11.761,-9.072,-12.881,-11.945,-7.716,-…	MYTYSAKRLDLFHPGAEQHCLLSNSVSFDIYKLCAEMSRLAYTDDNNDTRQGLTDIGYSTIKWISVLDNQALLAWNSEEKIGIISFRGTEPDDTGDIATDLSMSLIPHPDPTKGRIHRGFYQAFNDLKPDIDDWINKIERSNPEIEKWLITGHSLGAAMATIAASVLNFSQGSKRLINFGSPRVGDVDFVRAFPAGIEYRRYVNCCDVVCRVPPAISGVGDYDHLPNEYYIDLYGEILINPSPSIVAQNQQQARLDYFTDYAWQSGCLMVRDMADHIPINYFNALQKLE
1DT3	MGYP000558676218	181	119	7	1	170	15	180	1	0.0004828	132	269	181	EVSQDLFNQFNLFAQYSAAAY-CGKNNDAPAGTNITCTGNACPEVEKADATFLYSFEDSGVGDVTG--------FLALDNTNKLIVLSFRGSRSIENWIGNLNFDLKEINDICSGCRGHDGFTSSWRSVADTLRQKVEDAVREHPDYRVVF--TGHSLGGALATVAGADLRGNGYDIDVFS	SFSLPDAVLCNELVDTAYDMYAQWK--KQPANFHWKPKGPA--------LTYSAPI--WG---ATLWGNYLLEPFAFVAYSQSNIYLVVRGSETDSDWLDDFDLSQTAYSPVSGFGKVHAGFMSIYASMSPAVLAAVNNALQKLGPNAKALYVTGHSLGSGLSTLAVPDVIGLRIKAATSV	28.492,11.747,27.404,26.706,9.623,24.800,23.130,9.145,25.819,22.418,5.551,25.858,20.403,4.392,22.959,17.065,3.400,24.127,16.656,-0.032,23.116,13.936,-0.289,20.676,11.255,-2.380,21.862,11.711,-5.819,20.776,9.578,-6.419,17.971,8.108,-9.639,18.176,7.638,-11.159,15.067,4.146,-11.628,14.611,3.757,-15.090,13.886,3.330,-15.270,10.296,0.441,-17.624,9.632,-0.257,-19.327,6.310,-3.935,-18.045,6.307,-2.704,-…	MSTPRKSLPMYFPVSFSLPDAVLCNELVDTAYDMYAQWKKQPANFHWKPKGPALTYSAPIWGATLWGNYLLEPFAFVAYSQSNIYLVVRGSETDSDWLDDFDLSQTAYSPVSGFGKVHAGFMSIYASMSPAVLAAVNNALQKLGPNAKALYVTGHSLGSGLSTLAVPDVIGLRIKAATSVL
1DT3	MGYP000562448636	232	136	8	8	230	4	201	1	1.123e-11	364	269	259	NQFNLFAQYSAAAYCGKNNDAPAGTNITCTGNACPEVEK--------ADATFLYSFEDSGVGDVTGFLALDNTNKLIVLSFRGSRSIENWIGNLNFDLKEINDICSGCRGHDGFTSSWRSVADTLRQKVEDAVREHPDYRVVFTGHSLGGALATVAGADLRGNGYDI-DVFSYGAPRVGNRAFAEFLTVQTGGTLYRITHTNDIVPRLPPREFGYSHSSPEYWIKSGTLVPV	EQMSDLATMAMLAYEG------------------PEAARTGVATLGLSDFVHIER------AGTVVIAASD--ERNLVVAFRGTDDTRDVLYDADFST-EVGEL--GTRVHRGFRRALDAVWDDVRPIILGS-----DKKVLVTGHSLGGALAILSTARLLALGHRVEAVVTLGQPRVGKGGFSRQMNLRMQSKIFRVINYVDPVTRVPLALQGFRHPGRRWYFDGDGTLTE	-14.002,5.684,3.098,-13.964,8.310,5.825,-10.817,10.371,6.249,-10.368,9.329,9.886,-10.259,5.653,8.784,-7.612,6.566,6.178,-5.484,8.258,8.838,-5.765,5.161,11.151,-4.748,2.844,8.266,-1.877,5.184,7.395,-0.783,5.110,11.077,-0.952,1.240,10.934,1.250,1.344,7.803,3.761,3.408,9.734,3.657,1.222,12.889,4.862,-1.656,10.613,8.310,0.099,10.573,8.531,0.095,14.375,9.895,-2.673,16.580,7.245,-5.159,17.938,6.871,-3.…	MQREQMSDLATMAMLAYEGPEAARTGVATLGLSDFVHIERAGTVVIAASDERNLVVAFRGTDDTRDVLYDADFSTEVGELGTRVHRGFRRALDAVWDDVRPIILGSDKKVLVTGHSLGGALAILSTARLLALGHRVEAVVTLGQPRVGKGGFSRQMNLRMQSKIFRVINYVDPVTRVPLALQGFRHPGRRWYFDGDGTLTEDASALRVFVDEWAFRLRRLKSTRVLGLVWHNKGAYLAILDTSADAAVEPTGIDTGVNP
1DT3	MGYP000565190042	145	84	6	83	206	1	135	1	0.0007914	117	269	171	SRSIENWIGNLNFDLKEINDICSGCRGHDGFTSSWRSVADTLRQKVEDAVREHPDYRVVFTGHSLGG---ALATVAGADLR--------------GNG----YDIDVFSYGAPRVGNRAFAEFLTVQTGGTLYRITHTNDIVPRL	TMSLRDSMTDLACEYVTW----KGGLAHSGMLDCAQWFMEHIGRQLILFAEEYQVPNVIITGHSLCGSTAALTTIMLWELLREQEVQEGLGWPKLQSGEAIKLHCY--SYGTPAILSPDLACKYDHLIDNFIL----SNDIVPRL	15.723,-14.472,-0.918,13.780,-12.575,-3.291,14.085,-13.898,-6.703,15.443,-11.371,-9.231,12.233,-12.095,-11.104,10.134,-10.881,-8.207,12.105,-7.704,-7.981,11.653,-7.134,-11.636,7.972,-7.683,-11.408,7.831,-5.227,-8.636,9.807,-2.847,-10.768,7.533,-3.304,-13.748,4.979,-1.240,-11.936,2.134,-3.376,-13.195,-1.336,-2.283,-12.039,-4.504,-4.414,-11.792,-8.100,-3.427,-11.276,-8.881,-3.665,-7.543,-11.818,-2.…	TMSLRDSMTDLACEYVTWKGGLAHSGMLDCAQWFMEHIGRQLILFAEEYQVPNVIITGHSLCGSTAALTTIMLWELLREQEVQEGLGWPKLQSGEAIKLHCYSYGTPAILSPDLACKYDHLIDNFILSNDIVPRLSYGSVLDLQMLIVWAAENGSASDLFWGKDRSKSSSN
1DT3	MGYP000573623363	247	134	14	3	239	8	201	1	1.476e-07	210	269	263	SQDLFNQFNLFAQYSA-AAYC-GKNNDAPAGTNITCTGNACPEVEKADATFLYSFEDSGVGDVTGFLALDNTNKLIVLSFRGSRSIENWI----GNLNFDLKEINDICSGCRGHDGFTSSWRSVADTLRQKVEDAVREHPDYRVVFTGHSLGGALATVAGADLRGNGYDIDVFSYGAPRV--GNRAFAEFLTVQTGGTLYRITHTNDIVPRLP--PREFGYSHSSPEYWIKSGTLVPVTRNDIVKIE	TSDRKSLFAL-CQPLCREAYQPGNRDTFVSGS----------------DS---GF-------LVQ------EGERLIVAIAGSNDVSDWINRESGNLHFEPCGSSG---DFKFHSGMAIAAQHVAQEIRGDIFRFLHDHQDGVVIFTGHSRGGAIAQILPLLIGIDPSDYMVVTFGSPQVISGN--------LRQTAVH--FQNWSDIVHRLPVRIRGISYCHFGTIVR-------RTVDGQVIEYG	-18.009,0.366,15.960,-15.730,0.194,18.625,-13.572,-2.142,17.104,-11.992,-0.430,14.406,-11.299,2.563,16.420,-9.195,0.866,18.788,-7.164,-0.715,16.245,-6.215,2.426,15.029,-4.460,3.656,17.852,-1.362,1.836,17.768,0.545,2.584,14.589,3.491,0.603,15.822,1.311,-2.528,16.212,-0.175,-2.012,12.705,3.263,-1.516,11.278,4.590,-4.651,13.124,1.592,-6.670,11.834,1.497,-5.615,8.168,5.108,-4.852,7.202,6.332,-8.533,7…	MATVTAATSDRKSLFALCQPLCREAYQPGNRDTFVSGSDSGFLVQEGERLIVAIAGSNDVSDWINRESGNLHFEPCGSSGDFKFHSGMAIAAQHVAQEIRGDIFRFLHDHQDGVVIFTGHSRGGAIAQILPLLIGIDPSDYMVVTFGSPQVISGNLRQTAVHFQNWSDIVHRLPVRIRGISYCHFGTIVRRTVDGQVIEYGSVPDSFKSTIIAICLAIVAFFAMAGRFRMLPASLLKFVAAEVKASHMIETGYAMERWFPNEE
1DT3	MGYP000574957595	141	100	5	89	228	2	133	1	2.059e-05	178	269	175	WIGNLNFDLKEINDICSGCRGHDGFTSSWRSVADTLRQKVEDAVREHPDYRVVFTGHSLGGALATVAGADLRGN-GYDIDVFSYGAPRVGNRAFAEFLTVQTGGTLYRITHTNDIVPRLPPREFGYSHSSPEYWIKSGTLV	TMSSLETKKIEI----DQGMIHSGYYKRFQ---RGIYTSIIEILSQTNFSKVICIGHSLGGVMASLAGIYLNRDFGFKVEVKTYGSPLWGNCQIKKSLEKRKNIKITNYINVSDPVIY-KPRDR-YVRIGKVISMKIDTGN	10.467,-5.572,-17.568,7.619,-6.659,-15.663,6.443,-3.372,-15.266,5.960,-2.617,-18.748,3.218,-4.656,-19.058,1.202,-3.183,-16.673,-1.885,-3.014,-18.427,-3.757,-0.234,-17.129,-6.803,-1.944,-17.301,-9.453,-0.674,-15.259,-10.498,-2.537,-12.512,-13.280,-0.818,-11.053,-13.138,-0.839,-7.510,-15.194,1.687,-5.914,-15.528,3.636,-9.051,-11.892,4.068,-9.347,-8.918,2.663,-11.344,-6.198,0.401,-10.083,-3.041,-0.6…	DTMSSLETKKIEIDQGMIHSGYYKRFQRGIYTSIIEILSQTNFSKVICIGHSLGGVMASLAGIYLNRDFGFKVEVKTYGSPLWGNCQIKKSLEKRKNIKITNYINVSDPVIYKPRDRYVRIGKVISMKIDTGNDNVNHGIKVYRELVIGNKDYRHPKRIHRFDEVISRKIMDLLS
1DT3	MGYP000577384734	293	172	18	1	262	71	334	1	1.675e-12	370	269	402	EVSQDLFNQFNLFAQYSAAAYCGKNNDAPAGTNIT-CTGNACPEVEKADATFLYSFEDSGV---GDVTGFLALDNTNKLIVLSFRGSRSIEN----WIGNLNFDLKEINDICSGCRGHD----GFTSSWRSVADTLRQKVEDAVREHPDYRVVFTGHSLGGALATVAG-------ADLRGNGYDIDVFSYGAPRVGNRAFAEFLTVQTGGTLYRITHTNDIVPRLPPRE----FGY-SHSSPEYWI-KSGTLVPVTRNDIVK------IEGIDATGGNNQPNIPDIPAHLWYF	KLSHYDPELSMKMLLLSSAAY-----DPA---QRQECLDNALP---SEKFKIHTTVTKKCDLFDNECSAYVAISHELNVIALAFRGSADFNQTFTIFMESLSSPKTQF----LNGEVQTYWKRGFEELWSVMKAEVK----DLVFQNPSYQLWVTGHSLGGAMASLASTWLSYNSFAPRKN---IILYTFGMPRVGNYDYALQHDQLVNNS-WRVVNYNDIVPHFPTVASVSILNGPYHHGVEAFYSKPAT---SPNSEHRECHAKPYNE---DVTCSFSEFPLSIERHKTYF	-67.898,22.649,-14.184,-65.698,23.270,-11.053,-62.022,23.267,-11.319,-60.511,21.791,-8.287,-57.146,23.181,-7.633,-55.101,20.743,-5.787,-52.537,22.602,-3.793,-49.722,20.350,-3.528,-47.983,21.414,-0.468,-44.475,20.622,-1.080,-43.255,20.036,2.269,-39.712,20.042,1.717,-38.608,17.119,3.430,-36.351,18.774,5.551,-34.353,15.952,5.560,-32.540,16.589,8.560,-29.557,17.601,7.174,-28.222,17.307,10.452,-24.913…	MGAFIFLFIFLPLLTNVYGFICSESNCGDCVDSSVNCRWCRRDNKCRTPASIFNNCKRAENIVSQSHCGDKLSHYDPELSMKMLLLSSAAYDPAQRQECLDNALPSEKFKIHTTVTKKCDLFDNECSAYVAISHELNVIALAFRGSADFNQTFTIFMESLSSPKTQFLNGEVQTYWKRGFEELWSVMKAEVKDLVFQNPSYQLWVTGHSLGGAMASLASTWLSYNSFAPRKNIILYTFGMPRVGNYDYALQHDQLVNNSWRVVNYNDIVPHFPTVASVSILNGPYHHGVEAFYSKPATSPNSEHRECHAKPYNEDVTCSFSEFPLSIERHKTYFSIPVGTFWESKCVGSVFTPEQRVPTTTMSPLQRSDRSVGSTCCHLEFSSHFRRCLVLFSVQLWLL…
1DT3	MGYP000579341378	225	137	12	49	242	44	257	1	3.466e-10	332	269	321	ATFLYSFEDSGVGDVTGFLALDNTNKLIVLSFRGSR--SIENWIGNLNF--DLK-----EI-------NDICSG-------CRGHDGFTSSWRSV--ADTLRQKVEDAVREHPDYRVVFTGHSLGGALATVAGADLRGNG---YDIDVFSYGAPRVGNRAFAEFLTVQTGGTLYRITHTNDIVPRLPPREFGYSHSSPEY-WIKSGTLVPVTRND-IVK-IEGID	VKPLFY--DYGMGYTQVAICVSKEQENIYVIFRGTDVMEFPDILSNIDIVWDNYGPPKSSILDNDDDQQQAAARGPKVDVPGKVQRGWNRKIFNPKLHLPLSEKLLQIKEQYPTYKVIVAGHSLGAALSILYGVYVAKYVLPQDLVEVINLGSPRVGDETFYHAIQEISNLNIWRMVYQDDVVARLPPMWLGYRHVGHLLHWDK---------HDEIKAYHQQLE	-11.239,40.158,-1.399,-11.582,36.468,-0.858,-13.057,35.074,-3.910,-16.011,32.927,-3.009,-15.100,29.704,-4.473,-18.196,28.070,-5.664,-19.144,25.066,-3.603,-18.029,22.007,-5.342,-20.731,20.212,-7.187,-22.684,17.940,-5.003,-21.143,14.695,-5.156,-23.874,12.313,-5.965,-25.030,10.465,-2.726,-22.296,7.866,-1.729,-22.998,4.855,-3.765,-22.741,1.780,-1.504,-19.031,1.066,-1.921,-18.721,-2.615,-1.618,-16.094…	MLQEVDPPPRIPDPCEFDDPVQLSVVVSWVEDVMSKCWGEIENVKPLFYDYGMGYTQVAICVSKEQENIYVIFRGTDVMEFPDILSNIDIVWDNYGPPKSSILDNDDDQQQAAARGPKVDVPGKVQRGWNRKIFNPKLHLPLSEKLLQIKEQYPTYKVIVAGHSLGAALSILYGVYVAKYVLPQDLVEVINLGSPRVGDETFYHAIQEISNLNIWRMVYQDDVVARLPPMWLGYRHVGHLLHWDKHDEIKAYHQQLETCMDSECYAGIPVDELNVLFGKIGDHEHKHYKCVVKQARADPDKYWPKGFELLRKRDDKNTDVA
1DT3	MGYP000579543849	190	112	8	49	207	4	185	1	5.746e-07	219	269	314	ATFLYSFEDSGVGDVTGFLALDNTNKLIVLSFRG-SRSIENWIGN-------------------LNFDLKEINDICSGCRGHDGFTSSWRSVADTLRQKVEDAVREHPDYRVVFTGHSLGGALATVAGADL--------RGNGYDIDVFSYGAPRVGNRAFA---EFLTVQTGGTLYRITHTNDIVPRLP	YELLFRSPEVG-LKNRWTLFLRDD-NVAVINIRGTVKNATSWSANFYAPMIPATGALHLNDSTVFNYQLAEN----PAAAVHAGWTIALGHLAPTIMEQIHKLYKEKGTRQFIISGHSQGGAIAFLTRSYLYYEQKKGHLPNDIIFKTYCSAAPKPGNQPYAYDFDFITRGGWGLT--VVNAYDWVPESP	-20.674,-7.190,-11.356,-23.587,-8.737,-9.785,-21.744,-10.114,-6.986,-20.576,-7.033,-5.256,-22.622,-4.358,-3.417,-20.860,-1.018,-2.948,-21.436,-0.279,0.770,-19.012,2.654,1.396,-16.746,5.100,-0.386,-14.405,7.162,1.679,-13.794,10.881,0.882,-10.307,11.807,-0.321,-8.161,12.194,2.772,-4.519,13.102,3.540,-2.357,12.748,0.505,-5.464,12.277,-1.677,-5.884,8.614,-0.749,-9.262,6.865,-0.868,-10.728,3.390,-0.22…	KDRYELLFRSPEVGLKNRWTLFLRDDNVAVINIRGTVKNATSWSANFYAPMIPATGALHLNDSTVFNYQLAENPAAAVHAGWTIALGHLAPTIMEQIHKLYKEKGTRQFIISGHSQGGAIAFLTRSYLYYEQKKGHLPNDIIFKTYCSAAPKPGNQPYAYDFDFITRGGWGLTVVNAYDWVPESPFTIQNLTDFNPANPMADIKSILKQQKFLIRTAGNMVYNKLERKPRKAQRKMEKYLGHKLFKMGIRKTLPQLKEPDYVHSSNYMRAGTPVILMPDEAYRKQFPSDGKDKAFIHHLFASYSYLLNSNFMLK
1DT3	MGYP000579558792	238	140	12	8	217	19	237	1	3.71e-10	316	269	297	NQFNLFAQYSAAAYCGKNND---------APAGTNITCTGNACPEVEKADATFLYSFEDSGVG-------DVTGFLALDNTNKLIVLSFRGSRSIENWIGNLNFDLKEINDICSGCRGHDGFTSSWRSVADTLRQKVEDAVREHPDY--RVVFTGHSLGGALATVA------GADLRGNG-YDIDVFSYGAPRVGNRAFAEFLTVQTGGTLYRITHTNDIVPRLPPR---EFGYSHSS	TEAAICGSLVLTAY--DQYDQWQKAEFPPQGS-FRWTPNG--------LDFQYSALWVN--VPVRSVEFPEPFGFVAWNGDG-AAFVVFRGTMSVADGIVDLEVDQVPYPQVSNFGNVQVGWSAVYSSVSATLLAQLTQI-----GSISRLFFTGHSMGSALSTLALPDVATNSQVRPTSERSYVHYNFASPRVGDPGFAQGLNFTLPAPTFRIVNTEDLVPDAPPPLTGSLVYQHVG	21.238,-23.511,-18.223,20.718,-21.860,-14.934,18.888,-24.169,-12.602,15.691,-22.548,-11.631,15.939,-21.082,-8.259,13.869,-23.040,-5.899,11.024,-20.975,-4.668,11.354,-20.384,-0.987,8.243,-20.652,1.179,6.837,-17.354,2.494,7.958,-16.653,6.071,5.315,-15.118,8.315,6.703,-12.957,11.106,4.937,-12.688,14.522,1.555,-10.954,14.168,1.206,-11.497,10.416,-2.348,-12.813,9.618,-2.473,-14.470,6.192,-6.274,-14.17…	MTTPTQSLPMYFPPGFVQTEAAICGSLVLTAYDQYDQWQKAEFPPQGSFRWTPNGLDFQYSALWVNVPVRSVEFPEPFGFVAWNGDGAAFVVFRGTMSVADGIVDLEVDQVPYPQVSNFGNVQVGWSAVYSSVSATLLAQLTQIGSISRLFFTGHSMGSALSTLALPDVATNSQVRPTSERSYVHYNFASPRVGDPGFAQGLNFTLPAPTFRIVNTEDLVPDAPPPLTGSLVYQHVGTPVDFNAEYLSTDGNHSMIDCYWYAINNPDQPQGPQSSTDARATVRRELAGRPVPRPRGR
1DT3	MGYP000583705648	280	172	16	8	269	57	309	1	9.366e-14	433	269	310	NQFNLFAQYSAAAYCGKNNDAPAGTNITCTGNACPEVEKADATFLYSFEDSGVG--DVTGFLALDNTNKLIVLSF--RGSRSIENWIGNLNFDL--KEI---NDICSGCRGHDGFTSSWRSVADTLRQKVEDAVREHPDYRVVFTGHSLGGALATVAGADLR--GNG--YDIDVFSYGAPRVGNRAFAEFLTVQTGGTLYRITHTNDIVPRLPPREFGYSHSSPEYWIKSGTLVPVTRNDIVKI-EGIDATGGNN-QPNIPDIPA-HL--WYFGLIGTCL	DDLQMAGAFAQQTYC---VDQSVGTKVG------------DGEIVWT---TGDGWVNQRATIILSKSF-GLVISFQGTSPTDTKGWIEDFSFLKHYPDARIRSKLESGSLVETGFQKAYVGIADAVIGGIEEMTKKYNKHKITVVGHSLGAAIAEIAAVHIKTVWDDMLDRAIV--FGLPRVGNVHWANSVDSLMKGQYYYVFNGDDAVGRVPPRLLGYQHPSGQIWINPANSHHW------KFYPGQENIHGQISQPPSLDFNNTHLGSYFGTLIGWTC	-50.920,4.790,-37.958,-47.646,6.609,-37.356,-44.579,5.409,-39.219,-41.470,5.702,-37.169,-38.419,6.266,-39.265,-35.412,4.249,-38.465,-32.474,6.250,-39.621,-29.519,4.104,-39.835,-26.589,6.428,-39.271,-23.632,4.534,-40.505,-20.905,5.942,-38.482,-17.775,4.947,-40.373,-15.397,4.443,-37.632,-12.120,5.240,-39.200,-9.844,3.117,-37.191,-6.671,4.936,-37.264,-4.250,2.326,-36.562,-1.910,4.187,-34.509,0.881,1…	FMRFFSGLIAIIAASTMVAAAPHKNHTMILAEKAKNDKYVDAPTSHAAPQGLPVKVDDLQMAGAFAQQTYCVDQSVGTKVGDGEIVWTTGDGWVNQRATIILSKSFGLVISFQGTSPTDTKGWIEDFSFLKHYPDARIRSKLESGSLVETGFQKAYVGIADAVIGGIEEMTKKYNKHKITVVGHSLGAAIAEIAAVHIKTVWDDMLDRAIVFGLPRVGNVHWANSVDSLMKGQYYYVFNGDDAVGRVPPRLLGYQHPSGQIWINPANSHHWKFYPGQENIHGQISQPPSLDFNNTHLGSYFGTLIGWTCP
1DT3	MGYP000589671684	219	133	12	8	219	5	181	1	8.74e-08	225	269	206	NQFNLFAQYSAAAYCGKNNDAPAGTNITCTGNACPEVEKADATFLYSFEDSGVGDVTGFLALDNTNKLIVLSFRGSRSIENWIGNL-NFDLKEINDICSGCRGHDGFTSSWRSVADTLRQKVEDAVREHPDYRVVFTGHSLGGALATVAGADLRGNGYDIDVFSYGAPR----VGNRAFAEFLTVQTGGTLYRITHTN--DIVPRLPPREFGYSHSSPE	EQRKHFHSVCERAYLPVDTKLP-------TG---------------ESFHVFGGNMVVFR--QELDDVVNIAFQGSKTLPDWLQNFYAWPTKKVQHI---GKFHRGYACKV----IEHLQEIDTLLSTG--KQNIVGGHSAGGGEGGIFAAVSYRQELITQVVTFGAPQYIRKIYSAHHENWLR--QST----THYVNPYDMVTWVPP---GMQRIGKE	-8.112,-11.030,15.121,-6.728,-8.231,17.182,-5.610,-5.173,15.092,-2.053,-6.445,15.542,-2.857,-10.054,14.326,-4.598,-8.462,11.321,-1.458,-6.505,10.472,0.734,-9.576,10.935,-1.658,-11.517,8.657,-1.582,-8.623,6.114,2.252,-8.871,6.002,1.795,-12.511,4.753,-0.770,-11.173,2.223,1.887,-8.737,0.999,4.307,-11.646,0.483,1.680,-13.414,-1.654,1.339,-10.307,-3.834,4.881,-11.157,-5.152,3.907,-14.666,-6.375,3.710,…	MTPLEQRKHFHSVCERAYLPVDTKLPTGESFHVFGGNMVVFRQELDDVVNIAFQGSKTLPDWLQNFYAWPTKKVQHIGKFHRGYACKVIEHLQEIDTLLSTGKQNIVGGHSAGGGEGGIFAAVSYRQELITQVVTFGAPQYIRKIYSAHHENWLRQSTTHYVNPYDMVTWVPPGMQRIGKEVFKGIRVQGGSEHPLPLYAEFFKDV
1DT3	MGYP000591449196	216	149	9	54	258	10	212	1	7.524e-11	338	269	227	SFEDSGV----GDVTGFLALDNTNKLIVLSF--RGSRSIENWIGNLNFDLKEINDICSGCRGHDGFTSSWRSVADTLRQKVEDAVREHPDYRVVFTGHSLGGALATVAG--ADLRGNGYDIDVFSYGAPRVGNRAFAEFLTVQTGGTLYRITHTNDIVPRLPPREFGYS-HSSPEYWIKSGTLVPVTRNDIVKIEGIDAT--GGNNQPNIPDIPAH	ILIDHFVSDPGCGLTMAIFF--ANKKIYVAFGGVEYRELKDFFSPAQTAQDDL---GNDIRVHHGFNFILQKHMTGIMTALRGIQTRHAGAEIVITGHGLGGALSTLMGYYAAKDMPKSTIRVVSFAAPRVGNDAFRRAHDNMANLTHTRVVNKRDISVTMWVDDTTYAQVGNFVVHLTGKNV-------VNHYHR-YSYPEGFFSVAKCFNLADH	-2.733,14.372,12.994,-6.112,13.045,12.444,-7.309,13.907,15.685,-10.276,12.658,14.383,-12.445,10.649,16.577,-10.926,7.573,16.778,-13.382,6.152,18.886,-11.616,6.323,22.068,-12.049,2.617,22.086,-9.726,1.608,19.444,-7.012,-0.442,20.964,-3.835,-0.324,19.041,-2.473,-3.811,19.087,0.796,-2.971,17.451,2.626,0.350,16.807,5.840,1.052,14.950,7.687,4.350,14.732,11.017,4.310,12.940,12.352,7.854,12.484,15.389,6…	MVKGHMDANILIDHFVSDPGCGLTMAIFFANKKIYVAFGGVEYRELKDFFSPAQTAQDDLGNDIRVHHGFNFILQKHMTGIMTALRGIQTRHAGAEIVITGHGLGGALSTLMGYYAAKDMPKSTIRVVSFAAPRVGNDAFRRAHDNMANLTHTRVVNKRDISVTMWVDDTTYAQVGNFVVHLTGKNVVNHYHRYSYPEGFFSVAKCFNLADHFCIGYWSNLENRPEW
1DT3	MGYP000591864365	247	117	10	49	240	16	247	1	1.036e-08	279	269	290	ATFLYSFEDSGVG--DVTGFLALDNTNKLIVLSFRGSR----SIENWIGNLNFDLKEINDICSG-----CRGHDGFTSSWRSVADTLRQKVEDAVREHPDYRVVFTGHSLGGALATVAGAD--------------------------------------LRGNG------YDIDVFSYGAPRVGNRAFAEFLTVQTGGTLYRITHTNDIVPRLPPREFGYSHSSPEYWIKSGTLVPVTRNDIVKIEG	A---ISLN-GNLEAIDTQGFVAGG--RDLVVVAFRGTEVEADNPADVLTDLQAWKRPVPGFDPIDEVRRPRAHHGFVEALEAVAEDLWSTLERLGTEHPARPVWFAGHSLGGALAVLAAAAYDLRRDEANRAREQRAENWLQALGDEADEAALAEVDRRIRTEAPPLPPVGWIY--TIGQTAVGDERLAAWLEARFGHRLVRTVNNRDIVPRLPSRLIGYAHAGAELYFDS-------FGRMKLDPG	-0.439,-9.647,-12.488,-0.091,-11.805,-15.278,3.175,-12.564,-14.187,1.647,-13.808,-11.175,-0.522,-15.944,-13.198,-3.331,-13.896,-12.519,-5.478,-13.638,-15.434,-7.191,-10.593,-14.245,-9.747,-10.802,-16.857,-10.726,-14.109,-15.692,-10.610,-13.022,-12.379,-12.397,-10.031,-12.282,-15.805,-10.946,-11.436,-17.256,-8.095,-13.193,-17.565,-6.387,-10.084,-14.923,-4.137,-10.332,-15.616,-1.008,-8.571,-14.013,…	LRPLGLNLEKWLDRRAISLNGNLEAIDTQGFVAGGRDLVVVAFRGTEVEADNPADVLTDLQAWKRPVPGFDPIDEVRRPRAHHGFVEALEAVAEDLWSTLERLGTEHPARPVWFAGHSLGGALAVLAAAAYDLRRDEANRAREQRAENWLQALGDEADEAALAEVDRRIRTEAPPLPPVGWIYTIGQTAVGDERLAAWLEARFGHRLVRTVNNRDIVPRLPSRLIGYAHAGAELYFDSFGRMKLDPGAWYRGLDALVIDPDEAARRAREAVGDHDRETYIALLKGRGDRD
1DT3	MGYP000594140486	227	137	13	14	232	3	189	1	7.694e-06	167	269	203	AQYSAAAY-CGKNND--APAGTN-ITCTGNACPEVEKADATFLYSFEDSGVGDVTGFLALDNTNKLIVLSFRGSRSIENWIGNLNFDLKEINDICSGCRGHDGFTSSWRSVADTLRQKVEDAVREHPDYRVVFTGHSLGGALATVAGADLRGNGYDI-DVFSYGAPRVGNRAFAEFLTVQT-GGTLYRITHTNDIVPRLPPREFGYSHSSP--EYWIKSGTLVPVTR	TSKVAALWSCVAIYDQTTPGFFDSIHYVGC---------DTV----------GLIH------QDSVLHIVVAGTQNAKGWLEDFSVDPMEHPVLG---TVHGGFYGP--------AVSIFDDLRPLMTGKVSVMGHSRGAALAAAIAALCVLEGIPVEQVFMFAPPRLGMRKCADWFAAHLPQAMAWR--NGLDPVPEVPPP--LFVDVVPLMRIHVQPGGFDDINP	-10.495,3.963,14.818,-7.195,5.692,13.873,-7.055,9.110,12.315,-5.502,9.765,8.849,-2.827,11.710,10.637,-1.838,8.729,12.836,-1.881,6.500,9.747,0.310,9.024,7.914,2.801,9.140,10.804,3.042,5.356,10.979,3.219,4.728,7.216,5.392,7.664,6.173,7.858,8.078,9.115,7.815,5.484,11.889,8.130,2.380,9.698,11.340,3.748,8.241,12.718,4.986,11.616,12.779,1.657,13.309,14.784,3.275,15.999,11.877,4.729,17.681,10.777,2.238,…	MITSKVAALWSCVAIYDQTTPGFFDSIHYVGCDTVGLIHQDSVLHIVVAGTQNAKGWLEDFSVDPMEHPVLGTVHGGFYGPAVSIFDDLRPLMTGKVSVMGHSRGAALAAAIAALCVLEGIPVEQVFMFAPPRLGMRKCADWFAAHLPQAMAWRNGLDPVPEVPPPLFVDVVPLMRIHVQPGGFDDINPFAYHSGHLYVAGVV
1DT3	MGYP000594407164	270	138	15	6	223	18	265	1	4.594e-09	274	269	335	LFNQFNLFAQYSAAAYCGKN---------NDAPAGTNITCTGNACPEVEKADATFLYSFEDSGVGDVTGFLALDNTNKLIVLSFRGSR--SIENWIG----NLNFDLKEINDICS-GCRGHDGFTSSWRSVADTLRQKVEDAVREHPDYRVVFTGHSLGGALATVAGAD---LRGN---GYDIDVFSYGAPRVGNRAFA---EFLTVQTGGTLYRITHTNDIVPRLP-----PREF----------------------GYSHSSPEYWIK	VFNAH-FCIFLSELAYKRQDYVNRVLEPFQIPQHPSPLHN--------------FAVHHIESG--DTQCFVLVFG--SNVFVTFRGTEYNNLHGFIQDWNTDLNIQQVEFHAGNANAGNVHKGFNDALNTVWENIVGVLDDVCLNIENPRIWFTGHSLGGALAIMLTARFAGL-NNDNLGRIAGCYTFGAPMCGNANFQMHCDNLAISSK--IFRFENNNDIVPSAPFLGGHPASFIGRIGVLANAASNILFFAIPSPIYRHVGALYYID	-3.893,-1.171,24.172,-7.470,-2.222,23.458,-8.442,-3.714,20.039,-11.854,-2.623,20.546,-10.628,0.880,20.685,-8.599,0.485,17.455,-11.561,-1.240,15.729,-13.988,1.435,16.970,-11.662,4.189,15.578,-11.269,2.589,12.104,-13.316,4.743,9.703,-15.084,2.230,7.476,-16.970,4.320,4.947,-14.149,4.340,2.413,-13.183,7.957,3.172,-9.676,9.131,4.183,-8.872,8.970,7.932,-5.630,10.057,9.635,-6.225,7.134,12.117,-6.533,4.5…	MDLREINDNIVTNGNYSVFNAHFCIFLSELAYKRQDYVNRVLEPFQIPQHPSPLHNFAVHHIESGDTQCFVLVFGSNVFVTFRGTEYNNLHGFIQDWNTDLNIQQVEFHAGNANAGNVHKGFNDALNTVWENIVGVLDDVCLNIENPRIWFTGHSLGGALAIMLTARFAGLNNDNLGRIAGCYTFGAPMCGNANFQMHCDNLAISSKIFRFENNNDIVPSAPFLGGHPASFIGRIGVLANAASNILFFAIPSPIYRHVGALYYIDRHGSINNDSSHLSRRIDYTVGGLTGGALLDKLLDHRHKKYFEPLRENNQEAHLIPDIPDPLTPGSTCAMS
1DT3	MGYP000598401813	195	116	6	1	184	13	193	1	2.433e-11	352	269	193	EVSQDLFN-------QFNLFAQYSAAAYCG--KNNDAPAGTNITCTGNACPEVEKADATFLYSFEDSGV-GDVTGFLALDNTNKLIVLSFRGSRSIENWIGNLNFDLKEINDICS-GCRGHDGFTSSWRSVADTLRQKVEDAVREHPDYRVVFTGHSLGGALATVAGADLRGNGYDIDVFSYGAPRVGNRAFAEF	SSASSLLNSTTYDSTQLSTCVWLSGAAYCGKEKY------TSMKLSGPASG--------FIYKNTLYDIKTDLQGYIGILPSNKSIYVVLRGSSSIINWLDDFEVKLIPYTTFPECNCNVHYGFYNSALGVKDSMISSVQSLIKSYPTYSVIVTGHSYGASCAQLLAMELVKHNIPVQIYDYGQPRVGDKTYASF	31.475,23.950,38.608,31.069,20.258,39.014,29.787,18.435,35.986,27.742,15.504,37.000,28.080,12.700,34.577,24.942,10.736,34.472,25.622,7.305,33.145,22.576,6.114,31.502,22.616,2.391,31.259,20.989,1.472,28.084,19.299,-1.737,28.718,19.578,-3.627,25.636,16.769,-5.781,26.075,17.558,-8.660,24.012,15.319,-8.380,21.107,15.162,-11.985,20.862,11.906,-12.397,22.126,10.247,-11.258,19.417,10.035,-13.913,17.246,…	ILNLFVLSTLVISSASSLLNSTTYDSTQLSTCVWLSGAAYCGKEKYTSMKLSGPASGFIYKNTLYDIKTDLQGYIGILPSNKSIYVVLRGSSSIINWLDDFEVKLIPYTTFPECNCNVHYGFYNSALGVKDSMISSVQSLIKSYPTYSVIVTGHSYGASCAQLLAMELVKHNIPVQIYDYGQPRVGDKTYASF
1DT3	MGYP000604000073	224	135	6	1	195	56	270	1	1.781e-12	366	269	271	EVSQDLFN-----------------QFNLFAQYSAAAYCGKNNDAPAGTNITCTGNAC--PEVEKADATFLYSFEDSGVGDVTGFLALDNTNKLIVLSFRGSRSIENWIGNLNFDLKEINDICSGCRGHDGFTSSWRSVADTLRQKVEDAVREHPDYRVVFTGHSLGGALATVAGA-------DLRGNGYDIDVFSYGAPRVGNRAFAEFLTVQTG---GTLYR	PVDAAVFNNPFEIPTNNTLRLPTLADAQYYMLFSGAAYC--------SGSILLTNGTCHYCRATGPDVQLVTTLFNA-TTQVAGMININHEEQKIIVTFRGTFAAQNFAVDLLIVPVPFEEVNDAVLVHYGFLYYANSIYGQVRSKLLPLAVANPDYQIVVGGHSLGSALAMLTVVRLLTVEPEFIGGGPRFALFSYAGPRVGDEAFAQWRSEERRVGKECRSR	17.910,17.117,32.800,15.809,19.478,30.999,14.803,18.052,27.705,14.991,20.892,25.373,12.138,20.627,23.129,13.386,21.877,19.840,10.767,24.203,18.350,9.484,22.435,15.337,8.410,25.716,14.116,11.596,26.410,12.378,11.411,23.624,10.169,8.242,24.508,8.660,9.416,27.893,7.802,12.070,26.341,5.971,9.870,24.404,3.972,7.844,27.227,2.727,10.949,28.613,1.589,11.737,25.491,-0.214,9.039,26.019,-2.623,9.796,29.480,…	PRSTLFPYTTLFRSLGCILQNPARVQAQWPPVIATLVGTLESRLANVVHQLGLGNPVDAAVFNNPFEIPTNNTLRLPTLADAQYYMLFSGAAYCSGSILLTNGTCHYCRATGPDVQLVTTLFNATTQVAGMININHEEQKIIVTFRGTFAAQNFAVDLLIVPVPFEEVNDAVLVHYGFLYYANSIYGQVRSKLLPLAVANPDYQIVVGGHSLGSALAMLTVVRLLTVEPEFIGGGPRFALFSYAGPRVGDEAFAQWRSEERRVGKECRSRW
1DT3	MGYP000608723016	229	134	14	2	210	36	236	1	2.42e-07	170	269	238	VSQDLFNQFNL--FAQYSAAAYCGKNNDA---PAGTNITCTGNACPEVEKADATFLYSFEDSGVGDVTGFLALDNTNKLIVLSFRGSRSIENWIGN---LNFDLKEINDICSGCRGHDGFTSS-WRSVADT---LRQKVEDAVREHPDYRVVFTGHSLGGALATVAG---ADLRGNGYDIDVFSYGAPRVGNRAFAE---FLTVQTGGTLYRITHTNDIVPRL--PPRE	ASPDSLKEFAKKSLKAKLPTAELSLLQFARNQPTDSTGEVLNL-----------------DGESSGIQYAIVKQ--QSTTYVVFRGTADLTDWSVNALITPNAMWRTE---GNLQVHGGMLTELQNVAADALSLLRKKLGELGAEH--GKIIVCGHSLGGAYATLAAAFLLDKKIPVTKVF--GFGAPQVVWKGQEENPLWKQVHERLETY--VHRCDIVPRTLGPDAE	-20.176,9.750,23.891,-17.931,6.790,24.639,-17.533,5.777,21.299,-15.064,8.134,19.963,-12.270,7.167,22.239,-12.463,3.521,21.556,-12.039,4.220,18.083,-8.826,6.055,18.556,-6.887,3.216,20.226,-7.893,0.804,17.514,-6.794,3.186,14.742,-3.390,3.756,16.503,-2.852,-0.034,16.841,-3.691,-0.569,13.106,-1.339,2.361,12.186,1.524,0.919,14.323,1.115,-2.578,12.736,0.862,-1.032,9.190,4.068,1.032,9.843,5.897,-2.111,1…	VTSAAADSSSSQQLASTAALLSDWIYLKGRGMDPLASPDSLKEFAKKSLKAKLPTAELSLLQFARNQPTDSTGEVLNLDGESSGIQYAIVKQQSTTYVVFRGTADLTDWSVNALITPNAMWRTEGNLQVHGGMLTELQNVAADALSLLRKKLGELGAEHGKIIVCGHSLGGAYATLAAAFLLDKKIPVTKVFGFGAPQVVWKGQEENPLWKQVHERLETYVHRCDIVPRTLGPDAEWW
1DT3	MGYP000610076379	220	127	13	1	207	1	197	1	1.411e-08	238	269	285	EVSQDLFNQFNLFAQYSAAAYCGKNNDAPAGTNITCTGNACPEVEKAD--ATFLYSFEDSGVGDVTGFLA---LDNTNKLIVLSFRG-SRSIENWIGNLNFDLKEINDICSGCRGHDGFTSSWRSVADTLRQKVEDAVREHPDYRVVFTGHSLGGALATVAGAD---LRGNGY---DIDVFSYGAPRVGNRAFAEFLTVQTGGT-LYRITHTNDIVPRLP	MVSEEEL-RKKLWAAGRLAARITRDGSL----NFDSQAAADYETAGFQGGMYPVVSGPDGI---DAGLVCRSDIG-----LVMAFRGTTRTFEDWKNDFGGSFTPF---PGHGRVHTGFINSVRSVEDSLIRRAVLLYPSQQPGGLYLTGHSKGGAMASLMAAELDRLRPEGLPLPKVV--TFGAPRVGDSRFTE-----TYPCEHTRYESFRDIVPHLP	1.688,-1.234,24.475,3.585,-3.043,21.673,6.939,-1.633,20.516,7.024,0.061,17.068,9.244,-2.780,15.847,6.794,-5.432,17.050,3.824,-3.471,15.502,5.768,-3.261,12.179,6.443,-7.082,12.216,2.809,-7.942,12.977,1.397,-5.640,10.272,3.920,-6.910,7.682,2.898,-10.488,8.572,-0.754,-9.450,8.041,0.122,-7.940,4.623,1.859,-11.200,3.624,-1.205,-13.227,4.694,-3.458,-10.954,2.594,-1.102,-11.684,-0.389,-1.988,-15.413,0.0…	MVSEEELRKKLWAAGRLAARITRDGSLNFDSQAAADYETAGFQGGMYPVVSGPDGIDAGLVCRSDIGLVMAFRGTTRTFEDWKNDFGGSFTPFPGHGRVHTGFINSVRSVEDSLIRRAVLLYPSQQPGGLYLTGHSKGGAMASLMAAELDRLRPEGLPLPKVVTFGAPRVGDSRFTETYPCEHTRYESFRDIVPHLPITPQESALLTVVMENVTDWFSVFTQGDLCQYAPLGRLKDICPPGISVPCDIPGISGETLNSFYYVVTQLILKGRFSELGKYHMDDYPG
1DT3	MGYP000612038277	217	120	13	10	198	4	185	1	0.0006181	114	269	204	FNLFAQYSAAAYCGKNNDAPAGTN-------ITCTGNACPEVEKADATFLYSFEDSGVGDVTGFLALDNTNKLIVLSFRGSRSIENWIGNLNFDLKEINDICSGCRGHDGFTSSWRSVADTLRQKVEDAVREHPD---YRVVFTGHSLGGALATVAGADLRGNGYDIDV-FSYGAPRVGN----------RAFAEF-------LTVQTGGTLYRITH	NQEYAYLAEDAY----KTLEPGIRDLKKLKPRVVGG--------REYFVLEHADYRGTHDYQGTIYMDAQTHEIIVAHRGTWSVSDVGIDLEM----IRRQS-----NRQLPHAMA-LVEHAKALAERWNSYNPNEQVPNISVTGHSLGGSLAQVSS---QMYGLKGVAFDP------GGAENLMHAAVFKQFARTHQLPERGLGVPYDF----ENY	-13.200,-6.832,-1.478,-12.357,-3.079,-2.252,-13.111,-1.745,-5.777,-10.419,-0.109,-7.980,-12.154,3.236,-7.161,-11.900,2.575,-3.399,-8.182,1.743,-3.783,-7.869,5.159,-5.497,-9.547,6.955,-2.549,-7.332,5.119,-0.028,-4.195,5.937,-2.092,-5.245,9.622,-1.988,-6.257,9.457,1.711,-2.716,8.178,2.578,-1.457,11.758,1.756,-3.475,13.138,4.592,-1.740,13.533,7.833,-3.214,11.159,10.177,-2.863,10.972,13.768,-0.796,8.…	MATNQEYAYLAEDAYKTLEPGIRDLKKLKPRVVGGREYFVLEHADYRGTHDYQGTIYMDAQTHEIIVAHRGTWSVSDVGIDLEMIRRQSNRQLPHAMALVEHAKALAERWNSYNPNEQVPNISVTGHSLGGSLAQVSSQMYGLKGVAFDPGGAENLMHAAVFKQFARTHQLPERGLGVPYDFENYIVRGSGVSHYSGGHLGHTK
1DT3	MGYP000612085866	220	123	12	12	217	2	193	1	7.076e-11	301	269	230	LFAQYSAAAYCGKNNDAPAGTNITCTGNACPEVEK------AD-ATFLYSFEDSGV-GDVTGFLALDNTNKLIVLSFRGSRSIENWIGNLNFDLKEINDICSGCRGHDGFTSSWRSVADTLRQKVEDAVREHPDYRVVFTGHSLGGALATVAG----ADLRGNGYDIDVFSYGAPRVGNRAFAE--FLTVQTGGTLYRITHTNDIVPRLPPREFGYSHSS	SRSSAASDVYKRQAYLKP------------EFIEKQMTQWHYHSFTWI-----EDVNTDTQSFVAAK--GEHLVVCFRGTGSGKDWVVDANLFKTDSFD--GKGRVHRGFKSALDSVWDRI---AATLSTFGDDKKVFFTGHSLGAALAQLAAYRQATSGTNPVAG--VYVYGSPRIGNPTYKTVYNKHIGDKTFL--HINNLDLVPQVPPRILGYRHVG	-12.596,11.464,14.822,-12.436,11.573,11.281,-11.749,8.153,9.789,-8.751,9.481,8.246,-7.133,10.419,11.258,-6.282,7.015,12.252,-4.538,6.093,9.169,-2.920,9.300,9.001,-1.843,9.188,12.461,-0.363,5.903,11.924,1.485,7.123,9.164,3.083,10.108,10.608,5.865,8.382,12.062,6.705,5.193,10.826,9.183,4.856,8.638,12.004,4.590,10.743,10.940,3.654,13.848,11.964,0.481,15.326,9.012,-1.806,15.965,9.136,-0.979,19.661,8.5…	QSRSSAASDVYKRQAYLKPEFIEKQMTQWHYHSFTWIEDVNTDTQSFVAAKGEHLVVCFRGTGSGKDWVVDANLFKTDSFDGKGRVHRGFKSALDSVWDRIAATLSTFGDDKKVFFTGHSLGAALAQLAAYRQATSGTNPVAGVYVYGSPRIGNPTYKTVYNKHIGDKTFLHINNLDLVPQVPPRILGYRHVGNTPNRFDIGHELSNPVASTHDEDQEVERLDELPLELQ
1DT3	MGYP000618776516	246	133	18	21	211	14	235	0.442	0.3347	49	269	276	YCGKNNDAPAGTNITCTGNACPEVEKADATFLYSFEDSGVG--DVTGFLALDNT--NKLIVLSFRGS-RSIEN------WIGNLNF-----DLK-------EINDICSGCRGHDGFTSSWRSVADTLRQKVEDAVREHPDYRVVFTGHSLGGALATVAGADLRG-NGYDIDVFSYGAPRVGNR--AFAEFLTVQT----------------------------GGTLYRITHTND-IVPRLPPREF	SCGSLFYQPQKKIYT-----TPKAYKFEY---ENIFFKSLDSTRLNAWLIKSLSPPNGI-ILFFHGNAQNISTHFMNLAWISKYGWDIFMIDYRGYGQSEGRSSK--------EGIYQD---VIASF-DYIKEINKNKKYKRVVLYGQSLGGIASSGALIDYKSKHIFD-TIILDSTFD--SYLEIGKDVLKRSWITTPFSLLTKILLNDKHSLKNHYSKLPPKSKYLIIHGTHDKVVPYRFGKRI	17.912,21.437,-41.554,14.508,20.499,-40.825,15.177,17.195,-39.667,16.639,18.005,-36.473,13.676,19.231,-34.938,11.609,16.340,-34.779,13.581,14.629,-32.425,12.770,16.716,-29.609,9.262,16.215,-29.194,9.220,12.795,-28.313,10.543,13.188,-25.211,7.932,14.358,-23.297,6.600,11.240,-22.605,5.717,12.206,-19.263,8.303,10.561,-17.337,5.504,9.645,-15.085,4.399,6.998,-17.444,7.605,5.146,-17.068,7.149,4.677,-13…	MKLLFLSGIFLFISCGSLFYQPQKKIYTTPKAYKFEYENIFFKSLDSTRLNAWLIKSLSPPNGIILFFHGNAQNISTHFMNLAWISKYGWDIFMIDYRGYGQSEGRSSKEGIYQDVIASFDYIKEINKNKKYKRVVLYGQSLGGIASSGALIDYKSKHIFDTIILDSTFDSYLEIGKDVLKRSWITTPFSLLTKILLNDKHSLKNHYSKLPPKSKYLIIHGTHDKVVPYRFGKRIFDNIPFSKQLWTIKNGHHIGTYWENNKVYRKKLLDYLNKNN
1DT3	MGYP000618884080	250	152	11	1	227	33	270	1	1.162e-14	387	269	342	EVSQDLFNQF---NLFAQYSAAAY-------CGKNND-APAGTNITCTGNACPEVEKADATFLYSFEDSGVGDVTGFLALDNTNK--LIVLSFRGSRSIENWIGNLNFDLKEINDICSGCRGHDGFTSSWRSVADTLRQKVEDAVREHPDYRVVFTGHSLGGALATVAGADLRGN-GYDIDVFSYGAPRVGNRAFAEFLTVQTGGTLYRITHTNDIVPRLPP------REF---GYSHSSPEYWIKSGTL	AFDNDVAVELARLNLYSYQHLTDYENNVDFVLPPGHTLVDELITYEWFSGNTTEVG--DLP-IPL--------VVITTTDDDARLDGAITVWFRGSVTPSEWLDDATMVQTFFDEGGAGIRAHNGFVELYRSVRADLLLTLDDLADQHPDVDILFTGHSLGGALATLAALDVVETLDLQPRTYTFASPRVGDEAFRDAFHEKVH-TSWRVANINDYVPRYPPSHVVTGRDNVDTQYRHVQAVQEIDFGTW	4.660,70.237,23.716,3.723,66.740,24.120,5.299,63.604,25.736,5.884,60.449,23.923,5.333,57.659,26.379,7.381,54.496,25.654,5.421,51.484,26.789,7.844,48.698,27.549,5.854,45.630,27.388,7.557,43.010,29.521,7.138,39.904,27.626,7.273,37.317,30.332,8.464,34.341,28.501,7.014,31.561,30.337,9.278,28.919,29.296,7.081,26.146,29.862,9.609,23.505,29.975,8.538,21.043,27.531,9.498,17.917,29.041,10.314,15.891,26.20…	MRNAVTVFALLLLVVTGCRTSDVGLDAHANSAAFDNDVAVELARLNLYSYQHLTDYENNVDFVLPPGHTLVDELITYEWFSGNTTEVGDLPIPLVVITTTDDDARLDGAITVWFRGSVTPSEWLDDATMVQTFFDEGGAGIRAHNGFVELYRSVRADLLLTLDDLADQHPDVDILFTGHSLGGALATLAALDVVETLDLQPRTYTFASPRVGDEAFRDAFHEKVHTSWRVANINDYVPRYPPSHVVTGRDNVDTQYRHVQAVQEIDFGTWFEPPLLENSGLLEVDFDPSTEENIDFTAIDWDSPSLKTNHGICHHFNYFCSLTDDEDGCRLRADGQDGCNVD
1DT3	MGYP000621722814	232	133	14	1	220	68	263	1	4.172e-10	287	269	337	EVSQDLFNQFNLF-AQ-YSAAAYCGKNNDAPAGTNITCTGNACPEVEK--------ADATFLYSFEDSGVGDVTGFLALDNTNKLIVLSFRGSR--SIENWIGNLNFDLKEINDICSGCRGHDGFTSSWRSVADTLRQKVEDAVREHPDYRVVFTGHSLGGALATVAGADLRGNGYDIDVFSYGAPRVGNRAFAEFLTVQTGGTLYRITHTNDIVPRLPPREFGYSHSSPEY	RKNQQETEARRALLCMEAAMLSY--------------VTDE---SLVRKKLLQAGWTDINFFH-----NGG-T--HAFLAANPESALLVFRGTEINNREDLRTDINILLQPH---DAAGWIHRGFEEAYRLVDEELQKSIVALRENYPDCKLTIAGHSLGAALAVLAGAKL-PQTEAVY--SFGAPRIGTRNFRN----DYPVPVFRYVNNNDIVPLCLP-PIFYRHVGETR	29.086,36.232,-23.171,31.971,33.878,-22.552,30.539,30.478,-22.578,33.431,29.417,-20.513,32.056,31.204,-17.551,29.120,28.967,-17.497,30.848,25.672,-18.209,33.389,25.815,-15.431,31.007,25.713,-12.577,29.036,22.925,-14.063,32.063,20.818,-14.626,33.223,21.437,-11.071,29.941,20.349,-9.726,29.847,17.311,-11.831,33.347,16.253,-10.802,32.583,16.836,-7.201,29.505,14.813,-7.503,31.334,12.182,-9.207,34.032,…	MNLWLILLPILAVTLLVAFLVTTQGCRHRPPRSAQEVTRDVSFRALFKPQPDHPYFDLVDVTTLTSRRKNQQETEARRALLCMEAAMLSYVTDESLVRKKLLQAGWTDINFFHNGGTHAFLAANPESALLVFRGTEINNREDLRTDINILLQPHDAAGWIHRGFEEAYRLVDEELQKSIVALRENYPDCKLTIAGHSLGAALAVLAGAKLPQTEAVYSFGAPRIGTRNFRNDYPVPVFRYVNNNDIVPLCLPPIFYRHVGETRFIDFTGKLQRDTTIRDRAESRFIGHVEHAKQVFDHWGKGDWDAIPNGNFSDHAPINYVTPLREILKQMQQKNEG
1DT3	MGYP000626844025	247	150	12	5	203	11	227	0.214	0.4024	40	269	273	DLFNQFNLFAQYSAAAYCGKNNDAPAGTNITCTGNACPEVEKADATFLYSFEDSGVG--DVTGFLALDNTNKL-----IVLSFRGSRSIE----NWIGN-----LNFDLKEINDICSGCRGHDGFTSSWRSVADTLRQKVEDAVREHPDYRVVFTGHSLGGALATVAG------ADLRGNGYDIDVFSYGAPRVGNRAFAEFLTVQ--------------------------TGGTLYRITHTNDIV	AVVGLAGCENLTSLFFYPQQSYHYT------------PDFFGLEW---QTIHHQAEDGTELVSWYLPAKGEALGNVLFMH-GNAQNISTHISSVKWLPKAGYNVFLLDYREY----GHSQGTAVLPE----ILSDIDSALAWLLSHDEGKPIFLLGQSIGAALTAAYVPQSSYKDQISG------VILDACLLGYQEIASDVMSRSWLTWVLQLPTYLLPRAQDPQNHIANISPIPLFMMHSPDDEV	23.879,17.374,-34.426,23.620,14.731,-31.916,25.046,16.742,-29.126,22.620,19.644,-29.389,19.654,17.353,-29.023,20.941,15.985,-25.834,21.485,19.482,-24.333,17.998,20.498,-25.146,16.619,17.536,-23.457,18.633,18.336,-20.486,17.512,21.890,-20.438,13.949,20.892,-20.563,14.498,18.735,-17.711,16.087,21.592,-15.863,13.320,23.828,-16.249,10.681,21.487,-15.137,11.456,21.873,-11.635,12.643,18.957,-9.669,9.28…	MKSIRLLLLLAVVGLAGCENLTSLFFYPQQSYHYTPDFFGLEWQTIHHQAEDGTELVSWYLPAKGEALGNVLFMHGNAQNISTHISSVKWLPKAGYNVFLLDYREYGHSQGTAVLPEILSDIDSALAWLLSHDEGKPIFLLGQSIGAALTAAYVPQSSYKDQISGVILDACLLGYQEIASDVMSRSWLTWVLQLPTYLLPRAQDPQNHIANISPIPLFMMHSPDDEVIPYEQGKAVYELAKEPKQWLDLAGAHIQTFQFPSVRDELIVFMKSH
1DT3	MGYP000630776841	217	123	9	1	210	31	206	1	1.721e-09	246	269	250	EVSQDLFNQFNLFAQYS-----AAAYCGKNNDAPAGTNITCTGNACPEVEKADATFLYSFEDSGVGDVTGFLALDNTNKLIVLSFRGSRSIENWIGNLNFDLKEINDICSGCRGHDGFTSSWRSVADTLRQKVEDAVREH--PDYRVVFTGHSLGGALATVAGADLRGNGYDIDVFSYGAPRVGNRAFAEFLTVQTGGTLYRITHTNDIVPRLPPRE	SASPTTQAAMLADDAYLPQQQFLAKYQNPAYELIPAKAVS---------------------------INYYIFSQ--KEQLVIVFEGTKDISGLQTDLTIDEVEFLG-EKGSRVHNGYYAEALS----ARQ----ALSPYLNREKKIIITGHSLGGAVAHLLAAILYREGYVVNLYTFGSPPVGNERFAES--IEGL-SHERYTHVFDLIPMLKKEY	-25.182,-41.340,35.438,-22.434,-39.939,33.354,-19.977,-38.098,35.619,-18.744,-35.068,33.827,-15.035,-35.013,33.946,-13.799,-32.311,36.338,-11.636,-30.128,34.277,-8.338,-30.016,36.017,-7.618,-26.791,37.808,-4.696,-26.411,35.345,-6.993,-26.436,32.376,-9.207,-23.638,33.723,-6.207,-21.527,34.439,-4.809,-22.012,30.924,-8.109,-21.020,29.437,-8.367,-17.904,31.546,-4.766,-16.944,30.637,-5.515,-17.378,26.…	MTTRPKLSYNLKMKIIQIITFFTIFVITTLSASPTTQAAMLADDAYLPQQQFLAKYQNPAYELIPAKAVSINYYIFSQKEQLVIVFEGTKDISGLQTDLTIDEVEFLGEKGSRVHNGYYAEALSARQALSPYLNREKKIIITGHSLGGAVAHLLAAILYREGYVVNLYTFGSPPVGNERFAESIEGLSHERYTHVFDLIPMLKKEYVVKMKDALNYINRQLPENEMFYELVASIEGISYEYVHQGEHHYI
1DT3	MGYP000636856520	210	120	11	1	194	5	167	0.998	0.001468	94	269	169	EVSQDLFNQFNLFAQYSAAAYCGKNNDAPAGTNITCTGNACPEVE-KADATFLYSFEDSGVGDVTGFLALDNTNKLIVLSFRGSRSIENWIGNLNFDLKEINDICSGCRGHDGFTSSWRSVADTL-----RQKVEDAVREHPDYRVVFTGHSLGGALATVAGADLRGNGYDIDV-FSYGAPRVGNRAFAEFLTVQ---------TGGTLY	DVLPE---HVSEYAHLIDASYKG-------------TEEEKRQSMGQLPY---RLLKDLSSNNV--STFEHIKNGHIVTAIPGTK--------------NMADVGT------DFHVAAGTLEQSKRFAENKLAFEKTKNLFKDRKHIVVGHSLGGSLAKHINEECGDCVDEVHLFNA------GTSPVDSLIGLKDKLTKRVPPTNVHNY	-17.931,-2.671,-15.764,-21.006,-0.687,-16.099,-21.078,2.592,-14.406,-22.891,0.978,-11.720,-20.817,-1.549,-10.524,-20.549,-1.133,-6.887,-17.184,-2.086,-5.735,-17.051,-4.756,-3.086,-17.184,-3.204,0.332,-13.579,-4.177,1.167,-12.386,-2.535,-2.056,-14.010,0.761,-0.976,-12.294,0.372,2.401,-8.901,-0.148,0.689,-9.420,3.040,-1.400,-10.164,4.886,1.850,-7.046,3.429,3.615,-4.937,4.713,0.688,-6.591,8.165,1.08…	RGPTDVLPEHVSEYAHLIDASYKGTEEEKRQSMGQLPYRLLKDLSSNNVSTFEHIKNGHIVTAIPGTKNMADVGTDFHVAAGTLEQSKRFAENKLAFEKTKNLFKDRKHIVVGHSLGGSLAKHINEECGDCVDEVHLFNAGTSPVDSLIGLKDKLTKRVPPTNVHNYHV
1DT3	MGYP000639723975	180	92	8	114	234	81	252	0.353	0.459	46	269	269	TSSWRSVADTLRQKVEDAVREHPDYRVVFTGHSLGGALATVAGADLRGNGYDIDVFSYGAPRVGNRAFA-------------------------------EFLT----------------VQT--------GGTLYRITHTNDIVPR--LPPREFGYSHSSPEYWIKSGTL--VPVTRND	LEGWR---RDIGEAHRELVARSGASRIVWFGARIGATLALQAAASASPRIARLVLWEPVLE---GPGYLAHLREKHVAELELSHAIPKAEWRRSLRTDPEAFATEAFGFGISEVLRRQIMALTPDALQMSASTELVVIAKPDDTTTRAWVTAQTAG--QSARHVPLLHSMIWTSNPHPNN	-9.769,-17.623,-2.718,-12.473,-15.922,-4.827,-11.841,-13.387,-7.728,-14.305,-10.552,-7.718,-15.219,-7.162,-9.282,-16.497,-4.443,-6.983,-16.872,-0.507,-6.778,-19.075,1.813,-8.764,-19.737,1.056,-12.543,-17.434,3.981,-13.626,-14.513,2.679,-11.500,-14.522,-1.146,-11.091,-11.824,-2.772,-8.987,-10.425,-6.327,-9.270,-9.971,-8.090,-5.972,-9.117,-11.491,-4.420,-11.110,-12.382,-1.311,-9.492,-15.074,0.877,-…	MTPLMFGPPSRRLFGLFHAAEGTRASDTAVLLCPPMGHEALRSHRFYRLLALRLSRRGVPVLRFDPYGTGDSPGDDEDGDLEGWRRDIGEAHRELVARSGASRIVWFGARIGATLALQAAASASPRIARLVLWEPVLEGPGYLAHLREKHVAELELSHAIPKAEWRRSLRTDPEAFATEAFGFGISEVLRRQIMALTPDALQMSASTELVVIAKPDDTTTRAWVTAQTAGQSARHVPLLHSMIWTSNPHPNNEMVPAEALRRVMAEIHE
1DT3	MGYP000641165989	318	176	14	1	268	38	344	1	6.703e-17	532	269	348	EVSQDLFNQFNLFAQYSAAAYC-GKNNDAPAGTNITCTGNAC--PEVEKAD---ATFLYSFEDS---GVGDVTGFLALDNTNKLIVLSFRGSRSIENWIGNLNFDLKEINDI---------------CSGCRGHDGFTSSWRSVADTLRQKVEDAVREHPDYRVVFTGHSLGGALATVAGADLRGNGYDIDVFSYGAPRVGNRAFAEFLTV---------------QTGGTLYRITHTNDIVPRLPPREFGYSHSSPEYWIKSGTLVPVTRNDIVKIEGI---DATGGNNQPNIPDI--------PAHLWYFGLIGTC	EPAQD-YKKIVQFSNLAAVAYCVGRGLSKGRL---GDKGSGCHLSACKNDILKDVEIVKIFDFSTLNEV--GTGYYALDKKRKTIILVFRGSVSRRDWATDIDFIPTKYRPIVQDDNFECEVFIQQECINCKVHRGFYNFLKDNSGAIISLGIKLKKIYPDYQFLIIGHSLGAAFTTLSGIEFQLLGYDPLVVTYGGPKVGNQEFADFTDRLFDTEEVANCITMKNDFSRGFIRVVHKHDIIPFLPP---MFTHAGYEYFIDK-KQLPHEECDID-RRGMEYSGLLWKRSSGIRPSTFWPDSLGKYEHTHYFRRITSC	-56.941,-29.152,41.031,-53.730,-29.474,42.925,-51.792,-31.265,40.185,-52.737,-28.585,37.575,-51.501,-25.721,39.707,-48.229,-27.399,40.329,-47.587,-28.021,36.600,-48.442,-24.445,35.846,-45.958,-23.052,38.450,-43.206,-25.301,37.145,-43.866,-24.120,33.632,-43.714,-20.377,34.705,-40.438,-21.117,36.647,-38.910,-22.823,33.596,-40.006,-19.877,31.298,-38.496,-17.380,33.815,-35.194,-19.395,33.895,-35.038,…	LFVCLFVFNLFNLLLMLILIIIVLYCLSFAQEYKTDNEPAQDYKKIVQFSNLAAVAYCVGRGLSKGRLGDKGSGCHLSACKNDILKDVEIVKIFDFSTLNEVGTGYYALDKKRKTIILVFRGSVSRRDWATDIDFIPTKYRPIVQDDNFECEVFIQQECINCKVHRGFYNFLKDNSGAIISLGIKLKKIYPDYQFLIIGHSLGAAFTTLSGIEFQLLGYDPLVVTYGGPKVGNQEFADFTDRLFDTEEVANCITMKNDFSRGFIRVVHKHDIIPFLPPMFTHAGYEYFIDKKQLPHEECDIDRRGMEYSGLLWKRSSGIRPSTFWPDSLGKYEHTHYFRRITSCRDED
1DT3	MGYP000647878191	191	109	12	3	175	41	208	1	5.311e-06	181	269	208	SQDLFNQFNLFAQYSAAAYCGKNNDAPA-----GTNITCTGNACPEVEKADATFLYSFEDSG-------VGDVTG--FLALDNTNKLIVLSFRGSRSIENWIGNLNFDLKEINDICSG-CRGHDGFTSSWRSVADTLRQKVEDAVREHPDYRV-VFTGHSLGGALATVAGADLRGNGY--DIDVFSYGAPR	NLDLSLELALLCLQSYQA---------LEDYQNGQPFTLPAP---------YTLVKEFFTSEPYEGQNFSGE-VPIAFVATQ--GANVYVIFRGTATITEWIADAKIAQVAYN-FLDGPGLSEQGFTEVYRTLHQDILDTVKE-LQATGSYQILYVDGHSLGGGLATLAAPVYAKNSGFGDPTLYTFASPR	2.426,23.417,10.023,3.610,23.487,6.468,1.630,24.640,3.423,1.386,21.234,1.919,-1.277,20.081,4.116,-3.487,22.347,2.463,-2.480,21.220,-0.867,-3.161,17.677,-0.407,-6.469,18.279,0.968,-7.356,20.466,-1.820,-6.515,18.114,-4.505,-8.656,15.505,-3.258,-11.592,17.636,-3.114,-11.499,18.666,-6.605,-11.962,15.433,-7.995,-15.289,14.974,-6.758,-16.966,17.719,-8.350,-16.878,16.979,-11.789,-19.373,14.651,-12.727,-…	MGSWKRAAMAAMLVCFLGACGNGSSDSDEPDLGAADGEAFNLDLSLELALLCLQSYQALEDYQNGQPFTLPAPYTLVKEFFTSEPYEGQNFSGEVPIAFVATQGANVYVIFRGTATITEWIADAKIAQVAYNFLDGPGLSEQGFTEVYRTLHQDILDTVKELQATGSYQILYVDGHSLGGGLATLAAPVYAKNSGFGDPTLYTFASPR
1DT3	MGYP000650402254	245	147	10	1	224	3	219	1	1.269e-11	327	269	262	EVSQDLFNQFNLFAQYSAAAYCGKNNDAPAGTNITCTGNACPEVEKADATFLYSFEDSGVGDVTGFLALDNTNKLIVLSFRGSRSIENWIGNLNFDLKEINDICSGCRGHDGFTSSWRS----VADT------LRQKVEDAVREHPD--YRVVFTGHSLGGALATVAG---------ADLRGNGYDIDVFSYGAPRVGNRAFAEFLTVQTGGTLYRITHTNDIVPRLPPREFGYSHSSPEYWIKS	KLKR---YQYERYAILCQLSY------------PDAEAHY-RQVLKP---FHERHLVDKYGRMSVRILWVDNKKEAIVVFRGSLGLKDWLANLVFLPTRIKQVDKKFYVHWGFSRLLHQPMYSSTKTIDEALPLQELLVKVLEPLQNQGKRFTFIGHSSGGAVAVLMADYFERKNAKAVKR-------VVTFGQPAVGSRSWYKNYLLHHK--TYRICCDLDVVTFMPPFPFYFWHVGKMLWLHD	-15.104,13.426,5.675,-12.723,13.737,8.429,-9.361,14.919,7.271,-6.318,12.752,7.941,-4.801,14.327,10.953,-1.026,14.767,11.231,-0.562,12.267,14.066,-2.473,9.669,12.104,-0.245,9.798,8.995,2.936,9.731,11.174,1.609,6.700,13.037,0.877,4.960,9.697,4.314,5.960,8.356,5.968,4.335,11.399,3.816,1.195,11.020,4.998,1.003,7.380,8.622,1.478,8.418,8.242,-1.380,11.000,7.524,-3.698,8.010,11.143,-3.283,6.792,14.137,-…	MKKLKRYQYERYAILCQLSYPDAEAHYRQVLKPFHERHLVDKYGRMSVRILWVDNKKEAIVVFRGSLGLKDWLANLVFLPTRIKQVDKKFYVHWGFSRLLHQPMYSSTKTIDEALPLQELLVKVLEPLQNQGKRFTFIGHSSGGAVAVLMADYFERKNAKAVKRVVTFGQPAVGSRSWYKNYLLHHKTYRICCDLDVVTFMPPFPFYFWHVGKMLWLHDDQIYENTPTHKRFFKSLSSWLLRPITYHYMRKYIRNKSLFDEH
1DT3	MGYP000654138739	194	120	5	1	180	48	221	1	5.858e-07	231	269	227	EVSQDLFNQFNLFAQYSAAAYCGKNNDAPAGTNITCTGNACPEV----EKADATFLYSFEDSGVGDVTGFLALDNTNK----------LIVLSFRGSRSIENWIGNLNFDLKEINDICSGCRGHDGFTSSWRSVADTLRQKVEDAVREHPDYRVVFTGHSLGGALATVAGADLRGNGYDIDVFSYGAPRVGNRA	VPSNVSIRKLLSMSSYALGAYHSEK-------------SSLAHLLSLSEKD---ILFFNSVASVGKPACFLALNHHDNEYLLVYLMIFRIIVSIRGTQSELDVLRDLVIQPSSL----EGGLVHSGMREEANDVITILKPIIDMQLILHPNYKVVFTGHSLGAGSAAIATLILQSVYSNVFAYCFACPSCVSLN	-1.694,8.929,-29.596,-2.803,6.243,-31.354,-2.009,3.582,-29.123,-3.822,4.939,-26.305,-6.664,5.647,-28.332,-6.704,2.216,-29.343,-6.483,1.137,-25.868,-9.098,3.553,-25.022,-11.052,2.734,-28.065,-10.663,-0.732,-27.351,-11.958,-0.310,-24.073,-14.702,1.838,-25.111,-17.404,3.338,-22.900,-16.992,0.207,-21.213,-14.452,1.316,-19.086,-17.150,0.839,-16.894,-15.205,0.717,-13.855,-15.207,-2.811,-14.421,-11.785,…	MPVLKRVYDSFGDKMNYDFFNVMVLLVSEQPWSKIFNIDSSFSKGKPVPSNVSIRKLLSMSSYALGAYHSEKSSLAHLLSLSEKDILFFNSVASVGKPACFLALNHHDNEYLLVYLMIFRIIVSIRGTQSELDVLRDLVIQPSSLEGGLVHSGMREEANDVITILKPIIDMQLILHPNYKVVFTGHSLGAGSAAIATLILQSVYSNVFAYCFACPSCVSLNLLPRLQ
1DT3	MGYP000654448628	233	146	11	2	207	1	222	1	1.884e-08	218	269	228	VSQDLFNQFNLFAQYSAAAYCG----KNNDAPAG-TNITCTGNACPEVEK-----------ADATFLYSFEDSGVGDVT---GFLA--LDNTNKLIVLSFRGSRSIENW---IGNLNFDLKEINDICSGCRGHDGFTSSWRSVADTLRQKVEDAVREHPDYRVVFTGHSLGGALATVAGADLRGNGYDIDVFSYGAPRVGNRAFAEFLT---VQTGGTLYRITHTNDIVPRLP	MEPKHVHFLSDVAYATDVAFRGHKTANPKQSVAEVAVA-----AADDIAKRLRLRKGSADTSTVTLFHAKSGLFNIDLLSGFGFVAHGTGSRANELVLVTRGTNFQHNKVDLATNANIGYGIG---PRGNVFHRGFLKTFKSYQSQLVNFVSQSGAKRPS-TIHCMGHSLGGALANLNAAACAELGLNSYLYTVAAPRVGMVPYAEHLSKKMKAAHVYR--VANEADIVTMVP	1.803,-1.337,16.176,4.721,-3.685,16.854,7.273,-4.513,14.052,6.264,-8.187,14.210,2.740,-7.224,13.270,3.883,-5.162,10.294,5.923,-8.109,8.992,3.025,-10.554,9.359,0.573,-8.277,7.731,3.027,-7.755,4.922,3.266,-11.548,4.476,-0.509,-11.777,4.441,-0.536,-9.169,1.667,1.513,-11.492,-0.570,-1.122,-14.139,0.020,-3.719,-11.751,-1.571,-2.199,-12.273,-4.978,-2.101,-16.059,-4.553,-5.743,-16.094,-3.413,-6.852,-13.…	MEPKHVHFLSDVAYATDVAFRGHKTANPKQSVAEVAVAAADDIAKRLRLRKGSADTSTVTLFHAKSGLFNIDLLSGFGFVAHGTGSRANELVLVTRGTNFQHNKVDLATNANIGYGIGPRGNVFHRGFLKTFKSYQSQLVNFVSQSGAKRPSTIHCMGHSLGGALANLNAAACAELGLNSYLYTVAAPRVGMVPYAEHLSKKMKAAHVYRVANEADIVTMVPCYPFVH
1DT3	MGYP000659196827	176	123	6	63	231	14	183	1	3.945e-10	327	269	256	VTGFLALDNTNKLIVLSFRGSRSIENWIGNLNFDLKEINDICSGCRGHDGFTSSWRSVADTLRQKVEDAVREHPDY-RVVFTGHSLGGALATVAGADLRGNGYD------IDVFSYGAPRVGNRAFAEFLTVQTGGTLYRITHTNDIVPRLPPREFGYSHSSPEYWIKSGTLVPVT	ARCLIYLKTDRSTLFVQFGGTQGNKNVTEDINFVDQQWTTCGETVNLHKGFYDTYISISAPVLTTVKAFIAATPTLEKIVVAGHSLGGALATICALDLQNSDINSTWKSSMEVFTIGSPQVGSKNFVNLFNSKIG-ISIRAANPIDVIPHLLD-GVLY-HVKGY---LPTINSYTT	-20.960,2.566,17.606,-18.469,4.387,15.575,-15.782,2.179,14.380,-12.567,2.925,15.974,-10.392,4.782,13.725,-6.846,4.843,14.685,-4.568,7.357,13.210,-0.961,6.715,13.239,0.532,10.045,12.403,4.141,10.617,12.205,4.692,14.212,11.766,6.113,15.100,8.355,6.568,11.791,6.844,3.836,9.369,6.643,0.263,8.930,7.731,-1.286,5.575,8.299,-4.966,5.134,9.062,-6.090,1.865,10.623,-9.780,1.086,10.921,-12.256,-1.864,11.061,…	PQNPVYIVDVPNYARCLIYLKTDRSTLFVQFGGTQGNKNVTEDINFVDQQWTTCGETVNLHKGFYDTYISISAPVLTTVKAFIAATPTLEKIVVAGHSLGGALATICALDLQNSDINSTWKSSMEVFTIGSPQVGSKNFVNLFNSKIGISIRAANPIDVIPHLLDGVLYHVKGYLPTINSYTTVARAHSPYSYALGLENWSLPRVLGYTTLPVFVAALSIFAVWVILYVVTKYYEQKSRNPDFKFSENLRRLFLSP
1DT3	MGYP000660390328	238	131	11	49	268	4	222	1	7.315e-14	442	269	222	ATFLYSFEDSGVGDVTGFLALDNTNKLIVLSFRGSRSIENWIGNLNFDLKEIN--DICSGCRGHDGFTSSWRSVADTLRQKVEDAVREHPDYRVVFTGHSLGGALATVAGADLRGN--GYDIDVFSYGAPRVGNRAFAEFLTVQTGGTLYRITHTN--DIVPRLPPREFGYSHSSPEYWIKSGTLVPVTRND-IVKIEGIDATGG--------NNQPNIPDIPAHLWYFGLI---GTC	FVMTKYFVDE-KTKTEAYVGYRAASKAIVVAFEGSHNTQNWIVNLQFLKADFDYPGA-EHARVHGGFYKAYKNIQVDVENDVGALVDQFPDYQVYVTGHSLGGALAAFAALDITVNRPHVPVNVYTFGSPRVGNDAFQLYFQAQISNS---IRVVNKADIVPPLPPRAFNFHHVPREVWVEK--------SGVIVV------CNGSGEDPHCSDSLRTPWSTKDHLEYLGVVQGQGAC	-18.560,10.473,2.742,-21.862,10.031,4.294,-21.664,7.754,7.366,-18.002,7.362,7.772,-16.854,8.038,11.382,-13.257,9.049,11.739,-11.957,7.907,15.123,-8.302,8.789,14.795,-5.817,11.011,12.878,-2.078,10.234,13.095,0.874,12.430,12.208,4.494,11.560,12.680,6.129,15.007,12.923,9.581,13.617,11.964,8.593,11.891,8.744,5.332,13.838,8.010,3.622,10.438,7.696,-0.145,10.744,8.100,-2.854,8.121,8.606,-6.644,8.151,9.1…	TTGFVMTKYFVDEKTKTEAYVGYRAASKAIVVAFEGSHNTQNWIVNLQFLKADFDYPGAEHARVHGGFYKAYKNIQVDVENDVGALVDQFPDYQVYVTGHSLGGALAAFAALDITVNRPHVPVNVYTFGSPRVGNDAFQLYFQAQISNSIRVVNKADIVPPLPPRAFNFHHVPREVWVEKSGVIVVCNGSGEDPHCSDSLRTPWSTKDHLEYLGVVQGQGAC
1DT3	MGYP000665026603	235	147	15	13	225	8	226	1	6.062e-10	273	269	252	FAQYSAAAYCGKNNDAPAGTNITCTGNACPEVEKAD-----ATFLYSFEDSGVGDVT---GFLALDNTNK--LIVLSFRGSR-SIENWIGNLNFDLKEINDICSGCRGHDGFTSSWRSVADTLRQKVEDAV--REHPDYR-VVFT--GHSLGGALATVAGADLRGNGYDIDVFSYGAPRVGNRAFAEFLTVQTGG---TLYRITHTNDIVPRLPPREFGYSHS---SPEYWIKSG	LQVYELSTGAYESKGLP-VKRL---AELLGTLTSFTLTPDSLIILNGTTGLPLRPIYGGMGFIARLGGARSGELVIATRGTTASLSDVITDVSIAAERS---PAGYPIHTGFLKTFKTYMEQL-----KGVLSHQNLGFRPTAIHCLGHSLGGALANLNAAACAELGFNTFLYSIAAPRVGMVPFAEH--VSRKLQDEQVFRVANSSDPVTMLPC--FPYVHAPYTHGHYLLDSG	-5.391,-18.080,12.695,-2.836,-16.374,10.697,-2.866,-12.630,11.059,-1.969,-12.398,7.431,-4.564,-11.380,4.764,-5.121,-13.875,1.853,-4.026,-12.743,-1.710,-7.780,-12.485,-2.603,-8.523,-10.219,0.390,-5.490,-7.993,-0.468,-6.663,-7.850,-4.128,-10.298,-6.959,-3.146,-9.291,-4.305,-0.552,-6.727,-2.733,-2.965,-9.411,-2.571,-5.700,-11.880,-1.099,-3.119,-9.302,1.690,-2.368,-9.937,3.160,-5.894,-13.721,3.366,-5…	MTLQLSPLQVYELSTGAYESKGLPVKRLAELLGTLTSFTLTPDSLIILNGTTGLPLRPIYGGMGFIARLGGARSGELVIATRGTTASLSDVITDVSIAAERSPAGYPIHTGFLKTFKTYMEQLKGVLSHQNLGFRPTAIHCLGHSLGGALANLNAAACAELGFNTFLYSIAAPRVGMVPFAEHVSRKLQDEQVFRVANSSDPVTMLPCFPYVHAPYTHGHYLLDSGVRVTGSNHFMESGYSQMKSRSWGQLR
1DT3	MGYP000665584941	249	130	14	10	222	6	234	1	2.997e-11	315	269	291	FNLFAQYSAAA-------------YCGKNN---DAPAGTNITCTGNACPEVEKADATFLYSFEDSGVG---------DVT-GFLALDNTNKLIVLSFRGSRSIENWIGNLNFDLKEI--NDICSG--CRGHDGFTSSWRSVADTLRQKVEDAVREHPDYRVVFTGHSLGGALATVAGADLRGNGYDIDVFSYGAPRVGNRAFAEFLTVQTGGTLYRITHTNDIVPRLPPR---EFG---YSHSSPEYWI	LPLIQQAYVRVFESTRGEDPENWTFIGKQEFGPFAP----FQLPSG---------FTMVQEAFVQDMVIPFFKTDKTQIPFGFLVEG--EKYFVLVFRGTVAPVEWINNGFFLQRDFRCDGVEEGLELKVHGGFLDMFKMVRTTLKPGIEQL--EKANKPLVITGHSLGSAIAQMAALWL--AKYDPEVVTFGGPRVGSPDFVKHYN-STIRKSTRVVNGFDPVPALPPKLVLEKGKEIYKHTKTEQNI	-9.373,0.820,13.200,-5.821,2.106,12.742,-4.415,-0.101,15.517,-5.381,-3.115,13.548,-4.228,-2.007,10.076,-0.462,-1.963,10.794,-0.553,-5.415,12.543,-2.372,-6.701,9.377,0.293,-5.067,7.161,3.026,-6.775,9.305,1.261,-10.137,8.824,1.417,-9.515,5.008,5.262,-9.254,5.367,5.345,-12.417,7.624,3.391,-14.331,4.922,6.038,-13.520,2.197,8.885,-14.490,4.454,7.238,-17.809,5.305,6.675,-18.427,1.632,10.112,-17.390,0.4…	MREVLLPLIQQAYVRVFESTRGEDPENWTFIGKQEFGPFAPFQLPSGFTMVQEAFVQDMVIPFFKTDKTQIPFGFLVEGEKYFVLVFRGTVAPVEWINNGFFLQRDFRCDGVEEGLELKVHGGFLDMFKMVRTTLKPGIEQLEKANKPLVITGHSLGSAIAQMAALWLAKYDPEVVTFGGPRVGSPDFVKHYNSTIRKSTRVVNGFDPVPALPPKLVLEKGKEIYKHTKTEQNIYAGIKKLEGWKQITDPDVLYSHLPTTYLKALQNALHDLESSQDGTINRLSSAEEAPD
1DT3	MGYP000667864375	189	114	12	51	222	70	243	1	3.15e-08	242	269	321	FLYSFEDSGVGD-----VTGFLA-----LDNTNKLIVLSFRGSR--SIENWIGNLNFDLKEINDICSGCRGHDGFTSSW-RSVADTLRQKVEDAVREHPDYRVVFTGHSLGGALATVAGADLRGNGYDIDVFSYGAPRVGNRAFAEFLTVQTGG-TLYRITHTNDIVPRLPPR-EFGY--SHSSPEYWI	FDDV---RQVGSDPAKSTKGFFASRSGRAP----FAIMVFRGTDKDDPRNAVSDDDTFPVAR----DGYVVHRGFALALDQVWEAEVKPMLDDFLKAFSGASIYFAGHSLGAALATIAVTRFGGTNCALY--TVGSPRVGDDRFTVA--VLQKTNLVFRFVNSQDIVTQIPPEIPLHHHFRHVGNEKYI	-18.955,-5.614,-12.733,-17.080,-3.072,-11.159,-18.024,-0.088,-12.746,-15.215,0.630,-15.032,-13.398,3.673,-14.560,-15.073,5.592,-17.018,-11.899,6.214,-18.784,-8.373,5.413,-18.305,-7.473,8.894,-17.828,-4.677,9.878,-15.556,-7.021,11.761,-13.382,-9.300,8.889,-13.158,-6.591,6.463,-12.416,-5.373,8.432,-9.401,-8.501,10.357,-8.555,-11.514,8.402,-9.461,-14.606,10.404,-9.819,-17.217,10.761,-7.127,-19.105,8…	MPKRLPADTWNNLFYPPAGYNYFENSDRFDFEPDAAGFSWKNAWWLADAALLSYVKDWNLVRATLVRAHFDDVRQVGSDPAKSTKGFFASRSGRAPFAIMVFRGTDKDDPRNAVSDDDTFPVARDGYVVHRGFALALDQVWEAEVKPMLDDFLKAFSGASIYFAGHSLGAALATIAVTRFGGTNCALYTVGSPRVGDDRFTVAVLQKTNLVFRFVNSQDIVTQIPPEIPLHHHFRHVGNEKYIDRNAAVQDHPSEFDKFVDMAQGIVAHDGTTALAEIGHPAEYFRRIRNTGPWVDPPPYIVGNHTPARYAIDIWNFYSAT
1DT3	MGYP000667875435	181	128	6	51	229	10	177	1	3.447e-06	206	269	206	FLYSFEDSGVGDVTGFLALDNTNKLIVLSFRGSRSIENWIGNLNFDLKEINDICSGCRGHDGFTSSWRSVADTLRQKVEDAVREHPDYRVVFTGHSLGGALATVAGADLRGNGYDIDVFSYGAPRVGNRAFAEFLTVQTGGTLYRITHTNDIVPRLPPREFGYSHSS--PEYWIKSGTLVP	FTHWEDGSDTDGVAFGVEYLDDG-TQLVAHEGSHDALDWWRNFQVRLMQHPDLG---GIDAGL----FAGNDVALGKIKTYL--NKDKPVRLYAHSRGGSNAIYTGASLLLAGYKVAVRAFNPPRTQHQTSTRLSQIYAGQDILIIRTDCDPVSLEPP---GYVHPVEPEKFTVAPVDLDP	16.960,-11.272,-3.209,15.315,-9.279,-0.548,12.965,-11.449,1.287,11.853,-8.642,3.479,9.403,-10.522,4.707,10.351,-13.545,6.284,7.400,-15.144,4.722,7.554,-17.698,7.486,6.363,-15.141,9.983,3.037,-14.614,8.439,0.105,-16.799,9.499,-1.135,-16.486,5.964,1.041,-15.819,2.877,-0.090,-15.340,-0.713,2.648,-15.352,-3.384,0.615,-13.460,-6.054,-0.089,-16.480,-8.238,-3.759,-16.240,-7.421,-3.951,-12.532,-7.069,-2.…	YFTYYDKGRFTHWEDGSDTDGVAFGVEYLDDGTQLVAHEGSHDALDWWRNFQVRLMQHPDLGGIDAGLFAGNDVALGKIKTYLNKDKPVRLYAHSRGGSNAIYTGASLLLAGYKVAVRAFNPPRTQHQTSTRLSQIYAGQDILIIRTDCDPVSLEPPGYVHPVEPEKFTVAPVDLDPELEMKYHHIHLNIVGMALKERGFYGQFSS
1DT3	MGYP000669046057	154	96	5	82	211	1	150	1	1.425e-05	169	269	232	GSRSIENWIGNLNFDLK--------------EINDICS-------GCRGHDGF--TSSWRSVADTLRQKVEDAVREHPDYRVVFTGHSLGGALATVAGADLRGNGYDIDVFSYGAPR-VGNRAFAEFLTVQTGGTLYRITHTNDIVPRLPPREF	GTLSIADLMTDLAAKPVSLRDFLLEKVDALQLSTNEMANLQSLDQDIQVHAGMAEAAIYVFKEIKKKHLLDKAFVEYPDYALVVTGHSLGAGTAVILAFILRLEYGSLKCVAFGPPGGLLNVTASQLSTD----FVTSVVVGDDLVPRLSVNGY	15.683,-10.225,4.134,17.216,-8.498,1.466,14.594,-8.492,-0.889,16.031,-8.577,-4.237,14.970,-5.645,-6.272,13.508,-8.290,-8.540,11.266,-9.527,-5.829,10.200,-6.050,-5.067,9.470,-5.538,-8.589,7.581,-8.670,-8.989,5.617,-7.680,-6.123,5.056,-4.249,-7.472,3.965,-5.615,-10.684,1.096,-7.173,-9.222,-2.113,-6.370,-10.841,-4.791,-4.435,-9.008,-7.662,-6.605,-7.640,-11.121,-5.676,-6.325,-10.671,-5.965,-2.597,-14…	GTLSIADLMTDLAAKPVSLRDFLLEKVDALQLSTNEMANLQSLDQDIQVHAGMAEAAIYVFKEIKKKHLLDKAFVEYPDYALVVTGHSLGAGTAVILAFILRLEYGSLKCVAFGPPGGLLNVTASQLSTDFVTSVVVGDDLVPRLSVNGYLKLLSKMRYTLMACQLPKHKVLATGLCNCLSPLTWRQRLRQDPAVSLAIEDEPLDYGTTEHLNCGNWQEMFPPGKIIHIYKT
1DT3	MGYP000670667236	256	152	15	1	222	53	271	1	0.0003064	110	269	293	EVSQDLFNQFNLFAQYSAAAYCGKNNDAP----AGTNITCTGNA---CPEVEKA--------DATFLYSFEDSGVGDVTGFLALDNTNKLIVLSFRGSRSIENWIGNLNFDLKEINDICSGCRGHDG----FTSSWR---SVADTLRQKVED----AVREHPDYRVVFTGHSLGGALATVAGADLRGNGYDIDVFSYGAPRVGNRAFAE-------FLTVQTGGTLYRITHTNDIVPRLPPREFGYS-HSSPEYWI	SLPEGEKAR--LLLLARCARSAYPGVEPPKEFRAFS-----GDDWKNCVLGRRYEGFRFDNDGYLYV-------GSGLRARFLENRKTHDLVVAWSGCDLKDLTNGN-----------------PSGIADAITVVRQYIGDLADGQFEQAAKIFNGLILFYPGRRIDVVGHSLGGAIATYVVAVASDTENRVYGTTFNGLGL-SLDTAKQHMRPWRTHRAKNLIVN--VKCDTDPVYA---GVLVKSVHYGPTYSL	54.284,3.442,-1.141,50.688,4.826,-0.726,50.212,5.246,2.931,48.513,8.492,3.531,45.142,9.367,2.189,42.692,8.531,4.982,42.265,11.626,6.930,40.008,14.016,5.181,36.542,12.799,5.135,35.228,13.400,8.532,33.906,16.914,8.184,30.967,16.959,5.880,28.241,14.943,7.682,26.725,17.534,9.954,23.955,19.178,8.060,21.520,17.028,6.361,18.698,16.430,8.721,16.442,18.547,6.792,15.845,17.074,3.567,13.183,14.851,3.198,12.…	MIRSCLATVLVAFVWMTSCADENDDLFWREIRKDVGVGGVMDCRKEGEHPYSSLPEGEKARLLLLARCARSAYPGVEPPKEFRAFSGDDWKNCVLGRRYEGFRFDNDGYLYVGSGLRARFLENRKTHDLVVAWSGCDLKDLTNGNPSGIADAITVVRQYIGDLADGQFEQAAKIFNGLILFYPGRRIDVVGHSLGGAIATYVVAVASDTENRVYGTTFNGLGLSLDTAKQHMRPWRTHRAKNLIVNVKCDTDPVYAGVLVKSVHYGPTYSLPYSGGISHAMAQLISLMEQQGR
1DT3	MGYP000673786799	194	124	12	51	234	23	194	1	1.283e-06	188	269	210	FLYSFEDSGVGDVTGFLALDNTNKLIVLSFRGSRSIENWIGNLNFDLKEINDICSGCRGHDGFTSSWRSVADTLRQKVEDAVREHPDYRVVFTGHSLGGALAT----VAGAD-LRGNGYDIDVFSYGAPRVGNRAFAEFLTVQTGG-TLYRITHTNDIVPRLPPR--EFGYSHSSP--EYWIKSGTLVPVTRND	FNKTFS---AGQITVGYALIDG--VATFSFAGSESVFDWLRDFIALPFNHPLLG---TVHQGFWDD--------MDAVWLELQPLLTGNIAIQGHSLGCAHAALLTGLCGVNKIR--VGQLTL--FAPPRPGYAQLKDI--VQKNCDRVVSFWNGIDPVPQVPLPLPDQPWKHVAPLTRIVVPPKGLEVIIPTD	-3.518,-7.422,15.703,-2.160,-9.345,12.561,1.421,-10.706,12.841,3.856,-9.222,10.202,4.440,-12.675,8.699,0.631,-13.209,8.315,0.320,-9.720,6.706,2.992,-10.765,4.168,1.171,-14.051,3.510,-2.060,-12.165,2.874,-0.263,-9.824,0.457,1.003,-12.906,-1.371,-2.480,-14.443,-1.434,-3.976,-11.447,-3.265,-1.471,-12.041,-6.111,-3.011,-15.575,-6.374,0.110,-17.122,-5.130,-1.454,-18.595,-2.138,-4.503,-20.698,-1.381,-7…	MIPVAKAGDLCAAIYGSITPGVFNKTFSAGQITVGYALIDGVATFSFAGSESVFDWLRDFIALPFNHPLLGTVHQGFWDDMDAVWLELQPLLTGNIAIQGHSLGCAHAALLTGLCGVNKIRVGQLTLFAPPRPGYAQLKDIVQKNCDRVVSFWNGIDPVPQVPLPLPDQPWKHVAPLTRIVVPPKGLEVIIPTDWHNLDLYRNGTRGYQL
1DT3	MGYP000680803964	223	146	11	8	220	24	223	1	2.503e-09	294	269	285	NQFNLFAQYSAAAYCGKNNDAPAGTNITCTGNACPEV---EKADATFLYSFE---DSGVGDVTGFLALDNTNKLIVLSFRGSRSIENWIGNLNFDLKEINDICS--GCRGHDGFTSSWRSVADTLRQKVEDAVREHPDYRVVFTGHSLGGALATVAGADLRGNGYDI-DVFSYGAPRVGNRAFAEFLTVQTGGTLYRITHTNDIVPRLPPREF-GYSHSSPEY	KTALFLAVMCHLAYQK--------------RQKVLHVVRRLNGRGRF-ICKKKSIDV---DT--QCFAAEFENDVLVSFRGSWQWQDWLTNVQYHP-VNGPLYNNGRGKVHKGMWDALTPALNDLFKFLDTCDLAN--KSLWLTGHSLGGGLANLFAGVLREKGIRVTGLYTFATPKVADDYHASCIDNSILGPHYRLENKFDPVPDLPPSRLVNYHHSGKLI	-7.705,-5.837,-13.007,-11.208,-5.790,-12.915,-12.467,-9.146,-12.220,-16.149,-8.648,-11.965,-16.489,-12.091,-10.396,-13.976,-11.569,-7.604,-15.764,-12.401,-4.390,-14.272,-10.024,-1.757,-16.611,-11.494,0.917,-14.791,-14.785,0.994,-11.950,-13.191,2.857,-12.573,-12.506,6.485,-11.287,-9.392,8.175,-8.057,-10.583,9.746,-5.575,-8.002,10.940,-2.943,-9.583,13.194,-1.129,-7.046,15.391,1.787,-9.220,16.146,5.…	MNDPHFKFERYPLVLDRERRYCGKTALFLAVMCHLAYQKRQKVLHVVRRLNGRGRFICKKKSIDVDTQCFAAEFENDVLVSFRGSWQWQDWLTNVQYHPVNGPLYNNGRGKVHKGMWDALTPALNDLFKFLDTCDLANKSLWLTGHSLGGGLANLFAGVLREKGIRVTGLYTFATPKVADDYHASCIDNSILGPHYRLENKFDPVPDLPPSRLVNYHHSGKLIDIQDRSYRHFKSWPLFKANLKAIRRGKGKGLSIPNIYHRHNLNSGYNSYIPRLSRQLGKSSL
1DT3	MGYP000683349349	188	118	8	1	181	5	173	1	1.411e-08	258	269	175	EVSQDLFNQFNLFAQYSAAAYCGKNNDAPAGTNITCTGNACPEVEKADATFLYSFEDSGVGDVTGFLALDNTNKLIVLSFRGSRSIENWIGN-LNF-DLKEINDICS---GCRGHDGFTSSWRSVADTLRQKVEDAVREHPDYRVVFTGHSLGGALATVAGADLR--GNGYDIDVFSYGAPRVGNRAF	EFDYDLALKLL---SLSLESY-----HEGDAFQDEFEG----------LNKLAHINDL-VTDTQLFILIDEKTNELYIAFRGTSNIANLFTEVIAFKEKYPKEDNDSKLFPMKVHQGALNAYLTVKDKILEIVEKENNRFEVQRIYTTGHSQGGALATICAFDLKLTFPDIELAMYNYGSIRTGDRKS	-17.207,15.178,14.600,-14.349,14.880,16.919,-11.095,14.233,15.063,-10.351,10.564,15.512,-7.923,10.033,18.137,-4.498,9.236,16.688,-3.763,5.557,17.558,-0.014,5.496,18.501,0.112,1.680,18.901,-1.368,1.226,15.376,1.039,3.850,13.987,4.037,1.919,15.505,2.644,-1.416,14.161,2.310,0.086,10.644,5.776,1.704,10.897,7.236,-1.749,11.760,5.332,-3.313,8.728,6.739,-0.532,6.506,10.281,-1.221,7.708,9.883,-5.007,7.38…	MSDPEFDYDLALKLLSLSLESYHEGDAFQDEFEGLNKLAHINDLVTDTQLFILIDEKTNELYIAFRGTSNIANLFTEVIAFKEKYPKEDNDSKLFPMKVHQGALNAYLTVKDKILEIVEKENNRFEVQRIYTTGHSQGGALATICAFDLKLTFPDIELAMYNYGSIRTGDRKSVV
1DT3	MGYP000686309677	146	93	5	63	208	3	135	1	9.001e-07	210	269	170	VTGFLALDNTNKLIVLSFRGSRSIENWIGNLNFDLKEINDICSGCRGHDGFTSSWRSVADTLRQKVEDAVREHPDYRVVFTGHSLGGALATVAGADLRGNGYDIDVFSYGAPRVGNRAFAEFLTVQTGGTLYRITHTNDIVPRLPP	LDYTTEEH--QALLIIWIDGSNDYADWRRNLQF---RSRDLGRGRRTNRVDHK----EAVKLLRLERDAIRRHQ--HVLIIAHSRGAAIGQNLARELAVRGFEVDLVAYGYKRTGNGAFVAE--LEAIATVRAFRHRGDIVPLLPP	0.630,-9.353,-14.728,-0.828,-11.274,-11.897,-1.079,-9.700,-8.517,0.466,-11.913,-5.967,-1.510,-11.785,-2.692,-2.665,-13.963,0.176,-5.537,-13.617,2.714,-5.691,-14.901,6.255,-8.781,-14.873,8.542,-8.311,-14.338,12.192,-11.572,-14.095,14.129,-12.680,-10.604,13.448,-9.576,-9.610,11.440,-8.859,-10.071,7.688,-5.173,-9.990,6.833,-4.347,-9.139,3.164,-0.748,-9.602,1.986,0.195,-7.800,-1.256,3.590,-8.493,-2.8…	MALDYTTEEHQALLIIWIDGSNDYADWRRNLQFRSRDLGRGRRTNRVDHKEAVKLLRLERDAIRRHQHVLIIAHSRGAAIGQNLARELAVRGFEVDLVAYGYKRTGNGAFVAELEAIATVRAFRHRGDIVPLLPPWRAGLRHELIGAWKPPCTAHMSYGWRSENVDAEQT
1DT3	MGYP000686759509	311	163	18	1	258	6	285	1	2.353e-09	259	269	298	EVSQDLFNQFNLFA-------QYSAAAYCGKNNDAPAGTNITCTGNACPEV-----EKAD--ATFLYSFEDSGVGDVTGFLALDNTNKLIVLSFRGSRSIENWIGNLNFDLKEINDICSGCRGHDGFTSSWRSVADTLRQKVEDAVREHPDYRVVFTGHSLGGALATVAGAD--LRGNGY---DIDVFSYGAPRVGNRAFAEFLTVQTGGTLYRITHTNDIVPRLPP--------------REF----GYSHSSPEYWIKSGTLVPVTRN-DIVKIEGIDATGGNN---------------QPNIPDIPAH	NSQVNLAEVFNPDAVGFSASNMAYLAH-CAQAIYKP--------DSECTEAINKIDREIAKNI---RYFN-SRQTGTEGFI--SGDDEKIIIAFRGTSDRQDWLTDAASIQKSWSSITNIGKVHSGFFASLNSVWSVVIEHLEQL--QTNEQPVWITGHSLGGALAALAYATLRLQEPRYELAGAY--TFGQPRIGNDILCKEFDADSKHRFFRVVNNNDIVPRVPSKIARTGVSLLTYAARAIHDVDAYEHMGTQLYF--------DANGKLIH----DATFMDRLIGRFEGYKNNLFNGKLDFDSIEDH	6.575,-39.102,7.742,3.814,-37.384,9.309,3.421,-34.051,7.513,2.986,-31.730,10.226,-0.075,-29.841,9.516,1.107,-26.460,9.452,-1.313,-25.090,11.696,-2.624,-22.221,9.723,-2.025,-19.131,11.770,-5.403,-17.544,12.448,-4.553,-14.028,11.197,-7.616,-12.448,12.903,-6.443,-13.725,16.344,-2.927,-12.364,15.867,-3.955,-9.024,14.397,-3.366,-6.198,16.888,-5.747,-3.261,16.232,-3.880,-1.137,18.863,-0.377,-1.696,17.4…	MTVESNSQVNLAEVFNPDAVGFSASNMAYLAHCAQAIYKPDSECTEAINKIDREIAKNIRYFNSRQTGTEGFISGDDEKIIIAFRGTSDRQDWLTDAASIQKSWSSITNIGKVHSGFFASLNSVWSVVIEHLEQLQTNEQPVWITGHSLGGALAALAYATLRLQEPRYELAGAYTFGQPRIGNDILCKEFDADSKHRFFRVVNNNDIVPRVPSKIARTGVSLLTYAARAIHDVDAYEHMGTQLYFDANGKLIHDATFMDRLIGRFEGYKNNLFNGKLDFDSIEDHSMNDYRSLCMSLL
1DT3	MGYP000686987407	267	145	15	4	229	30	262	1	5.843e-08	198	269	281	QDLFNQFNLFAQYSAAAYCGKNNDAPAGTNITCTGNACPEV---EKAD-ATFLYSFEDSGVGDVTGFLALDNTNKLIVLSFRGSRS-----------------------IE-----------NWIGNLNFDLKEINDICSGCRGHDGFTSSWRSVADTLRQKVEDAVREHPDYRVVFTGHSLGGALATVAGADLRGNGYDIDVFSYGAPRVGNRAFAEFLTVQTGGT-LYRITHTNDIVPRLPPR--EFGYSHSSPEYWIKSGTLVP	QDFEEYWQTNRAWVLANMCHTAYHS---------QKTIFLLMEKMGAEETRI--YDRNGA------QAFLAVWRNQAILTFRGTQPFEKKKVPSGMAKCIDPFLEQSLKIHLPDEYNSFLSNDIVADLMLGLTPV----GQAKVHRGFLGEFTKIWEPLILPDLQTLTDPQNIPVSVTGHSLGGAMATLAGIH--KNFHEVV--TFGEPRV-GHSISN----EFKSQQHLRFINGNDPIPKLPPKWWPFSYTHHGRK----KKIMVP	16.817,4.731,-46.436,13.299,3.806,-45.620,12.532,4.434,-41.993,10.820,1.452,-40.662,8.015,2.727,-38.506,7.620,0.359,-35.616,4.195,0.559,-34.292,4.303,0.325,-30.629,2.764,-2.744,-29.411,-0.086,-1.772,-27.440,0.077,-3.501,-24.304,-3.293,-4.218,-23.621,-2.970,-5.439,-20.345,-4.607,-8.413,-21.459,-6.257,-9.011,-18.476,-6.928,-12.448,-19.577,-10.079,-12.401,-18.023,-10.116,-15.987,-18.762,-7.355,-16.2…	MQATTHTPKTFQAVIHPEKFPPFPFVLAPQDFEEYWQTNRAWVLANMCHTAYHSQKTIFLLMEKMGAEETRIYDRNGAQAFLAVWRNQAILTFRGTQPFEKKKVPSGMAKCIDPFLEQSLKIHLPDEYNSFLSNDIVADLMLGLTPVGQAKVHRGFLGEFTKIWEPLILPDLQTLTDPQNIPVSVTGHSLGGAMATLAGIHKNFHEVVTFGEPRVGHSISNEFKSQQHLRFINGNDPIPKLPPKWWPFSYTHHGRKKKIMVPDGSDVIYDHSILYYAQNLA
1DT3	MGYP000688444431	263	145	15	3	234	39	279	1	9.64e-13	372	269	316	SQDLFNQFNLFAQYSAAAYCGKNN------DAPAGTNITCTGNACPEVEKADATFLYSFE----DSG---VGDVT-GFLALDNTNKLIVLSFRGSRSIENWIGNLNFDLKEINDICSGCRGHDGFTSSWRSVADTLRQKVEDAVREHPDYRVVFTGHSLGGALATVAGADL--RGNGYDIDVFSYGAPRVGNRAFAEFLTVQTGG-TLYRITHTNDIVPRLPPR---------EF-----GYSHSSPEYWIKSGTLVPVTRND	SFDLASAVTL-MQLCLESY--QMLTDFENGQT-----FTLSAP---------YTLQAQFLTEERFSGEGLDGKVPIAFVATS--GSSIYVVFRGTKTISEWISDATLSQVDYTYVAGGGKTETGFTDVYESIRTPILQEVNALAAAGSYTTLYITGHSLGGALTVVAAPDLAAQTQFTQPIVYSFAGPRAGDPIFASL--YDDAIGNSWRVVNTNDEAPKVPPAITIVVGPGPEFKREYFFYEHVEGEYDITFGGPIR-SVSD	4.481,4.618,-43.452,5.241,2.220,-40.526,7.096,4.017,-37.743,8.960,1.331,-35.891,9.044,2.181,-32.340,12.334,1.084,-31.059,12.099,-0.376,-27.639,15.000,0.841,-25.727,15.685,-1.610,-22.941,17.166,0.222,-20.097,19.877,-1.812,-18.501,19.647,-1.646,-14.777,23.076,-2.078,-13.213,22.780,-3.152,-9.609,25.528,-1.784,-7.542,25.686,-3.032,-3.984,26.991,-0.707,-1.513,27.791,-1.786,1.905,26.669,0.713,4.388,28.…	MTTTVKHWAATVLLAIFLSACGGSDDDGSPAPPGLEDDSFDLASAVTLMQLCLESYQMLTDFENGQTFTLSAPYTLQAQFLTEERFSGEGLDGKVPIAFVATSGSSIYVVFRGTKTISEWISDATLSQVDYTYVAGGGKTETGFTDVYESIRTPILQEVNALAAAGSYTTLYITGHSLGGALTVVAAPDLAAQTQFTQPIVYSFAGPRAGDPIFASLYDDAIGNSWRVVNTNDEAPKVPPAITIVVGPGPEFKREYFFYEHVEGEYDITFGGPIRSVSDLIFNHSSCNYFATLCGQTSDPTQCEQAGQGLNGCSFS
1DT3	MGYP000692107340	139	83	4	100	228	4	137	1	4.993e-06	186	269	153	INDICSGCRGHDGFTSSWRSVADTLRQKVEDAVREHPDYRVVFTGHSLGGALATVAGADLRGNGYDIDVFSYGAPRVGNRAFAEFLTVQTGGTLYRITHTNDIVPRLP---PREF-------GYSHSSPEYWIKSGTLV	LHNVSAPPEVHTGFLE----VYSNFREKLANKLNELKPKQVIVAGHSLGGAVSTICGLDLQLLGYNTIVYNFASPRVGNNLFCDLVK-SSKLPIYRIVNTTDIIPTFPSSVSRNFIDTDRPYIYTHCGEMIAFTSNWKS	19.759,34.985,-0.842,18.293,31.352,-1.519,17.594,29.934,1.702,14.819,28.149,0.097,14.901,25.117,2.146,13.652,23.433,-1.098,12.808,20.226,-0.575,10.061,19.194,1.208,9.839,16.607,-1.181,6.244,16.263,-0.906,4.867,13.104,0.124,5.285,10.835,-2.975,4.101,7.439,-3.755,4.833,4.915,-6.516,2.992,6.111,-9.627,1.845,2.602,-10.605,0.155,1.955,-7.238,-1.559,5.360,-7.297,-2.846,4.748,-10.829,-4.475,1.468,-9.775…	VRFLHNVSAPPEVHTGFLEVYSNFREKLANKLNELKPKQVIVAGHSLGGAVSTICGLDLQLLGYNTIVYNFASPRVGNNLFCDLVKSSKLPIYRIVNTTDIIPTFPSSVSRNFIDTDRPYIYTHCGEMIAFTSNWKSYINNHLLPVYIEYLLT
1DT3	MGYP000701754657	159	93	7	62	206	19	170	1	4.219e-07	204	269	262	DVTGFLALDNTNKLIVLSFRGSRSIENWIGNLNFDLKEINDICSGCRGHDGFTSSWRSVADTLRQKVEDAVREHPD-----YRVVFTGHSLGGALATVAG-----ADLRGNG--YDIDVFSYGAPRVGNR--AFAEFLTVQTGGTLYRITHTNDIVPRL	PVAYAVAADDEKGTLWISIEGSTSLASWQTNLTFQPVSFEDPALDVRVHRGAYEAAR----DIYDAVEGIVRAHVDVHGTNARVHITGHSIGGSLAMVLALMLILRGAADKKHVADVW--TFGAPYVLCGGDALLRRLSLPRS-FIKSVAMGKDIVPRS	-8.821,-14.851,30.618,-7.130,-12.697,28.229,-4.950,-14.545,26.065,-1.905,-12.662,26.325,-0.901,-12.463,23.002,2.614,-11.622,23.414,2.728,-8.130,22.637,4.995,-8.414,20.082,5.577,-10.730,17.626,7.671,-8.945,15.527,8.287,-11.726,13.255,10.929,-11.175,10.795,10.162,-13.351,8.019,12.730,-13.723,5.523,11.059,-13.144,2.403,12.671,-15.107,-0.176,12.480,-12.380,-2.534,12.581,-9.178,-0.647,13.631,-8.938,2.…	PGRDFPAETSKRLPSKRLPVAYAVAADDEKGTLWISIEGSTSLASWQTNLTFQPVSFEDPALDVRVHRGAYEAARDIYDAVEGIVRAHVDVHGTNARVHITGHSIGGSLAMVLALMLILRGAADKKHVADVWTFGAPYVLCGGDALLRRLSLPRSFIKSVAMGKDIVPRSFSCYYPAWARRALEMAPGSLKVDVLAQKSFLEEEMFYSPVGDMFLLQAMHGSGAIMVLRPAVWLPRLTTPLRKTCARVCFSARSMIIAQRTR
1DT3	MGYP000706130266	221	141	10	9	222	3	196	1	1.266e-09	313	269	242	QFNLFAQYSAAAYCGKNNDAPAGTNITCTGNACPEVEKADATFLYSFEDSGVGDVTGFLALDNTNKLIVLSFRGSR--SIENWIGNLN-FDLKEINDICSGCRGHDGFTSSWRSVADTLRQKVEDAVRE---HPDYRVVFTGHSLGGALATVAGADLRGNGYDI-DVFSYGAPRVGNRAFAEFLTVQTGGTLYRITHTNDIVPRLPPREFGYSHSSPEYWI	IDHKMAILASIAY-------------LDSKEAKPKIKELGYTGSKFFE---RSGAQCHAIWN--KDEYILAFRGTEPDELTDVLADLNAIPRGAM----THGLVHSGFRGEIDKLWKQIERHWSGNGGETKGHRGKKLYICGHSLGGAMATIAASRF-EEAVPVEQLTTFGSPRVGTRNFVK----NIVTPHRRYVNNNDIVTKVPLFIMGYKHHGKRQYI	-13.567,-12.867,-5.336,-9.896,-13.528,-5.082,-8.246,-11.692,-2.078,-5.849,-9.666,-4.236,-8.693,-8.356,-6.378,-10.607,-7.479,-3.188,-7.501,-5.615,-1.912,-7.207,-3.739,-5.213,-10.843,-2.554,-4.966,-10.278,-1.515,-1.309,-7.039,0.335,-2.267,-9.144,2.185,-4.900,-11.903,2.927,-2.284,-9.129,4.583,-0.122,-9.284,7.607,-2.502,-12.998,8.187,-1.584,-14.288,10.178,1.328,-16.159,8.377,4.165,-19.612,9.060,2.620…	MHIDHKMAILASIAYLDSKEAKPKIKELGYTGSKFFERSGAQCHAIWNKDEYILAFRGTEPDELTDVLADLNAIPRGAMTHGLVHSGFRGEIDKLWKQIERHWSGNGGETKGHRGKKLYICGHSLGGAMATIAASRFEEAVPVEQLTTFGSPRVGTRNFVKNIVTPHRRYVNNNDIVTKVPLFIMGYKHHGKRQYINFHGNIRKLTPWQMVKDRWRGYKSGVLDGALDHGMHNYVKATSKVK
1DT3	MGYP000709414770	270	174	11	1	248	82	326	1	1.054e-09	320	269	391	EVSQDLFNQFNLFAQYSAAAYCGKNNDAPAGTNITCTGNACPEVEK----ADATFLYSFEDSGVG----DVTGFLALDNTNKLIVLSFRGSRSIENWI----GNLNFDLKEINDICSGCRGHDGFTSSWRSVADTLRQKVEDAVREHPDYRVVFTGHSLGGALATVAGADLR------GNGYDIDVFSYGAPRVGNRAFAEFLTVQTGGTLYRITHTNDIVPRLPPREF---GYSHSSPEYWIKSGTLVPVTRND-IVKIEGIDATGGNN	TIATYVSELAVMLTIVSGAAYV---------------RQPQPCLDKYLASEQIQVVDIIGRACSSLFDDECVVLVAISHVTKRIYLSYRGSTSVKQLLTEIVTTLITAKVPF---KGAGYVQKYFRDTFMLLYPCVKNSLEEKMKAYPGYTVAVTGHSLGGALASLAALALVQDKLVPSHRVFLY--NFGSPRVGDKLYANTHDRLVPNS-FRVVHYKDIVAHIPTRSPSLDPPHHHKTEIFYPMNM----TPSSNYTVCIDDEDISCTD	-69.119,-17.056,26.097,-67.097,-18.677,23.404,-66.047,-15.389,21.853,-64.313,-14.111,24.928,-62.034,-17.120,25.238,-60.893,-16.831,21.678,-59.995,-13.219,22.178,-57.758,-13.939,25.202,-55.853,-16.625,23.271,-55.179,-14.153,20.428,-53.872,-11.495,22.831,-51.580,-14.013,24.647,-50.208,-15.269,21.291,-49.597,-11.598,20.200,-47.714,-10.732,23.423,-45.564,-13.904,23.185,-44.694,-13.066,19.498,-43.609,…	MFRLEIMNWLVAFWIFAVISVECLSTKCKLAKNCTTCINSSNIDSTCEWCPLDRKCYVNGTSGIACTSKMVVKHPSVCLSTTIATYVSELAVMLTIVSGAAYVRQPQPCLDKYLASEQIQVVDIIGRACSSLFDDECVVLVAISHVTKRIYLSYRGSTSVKQLLTEIVTTLITAKVPFKGAGYVQKYFRDTFMLLYPCVKNSLEEKMKAYPGYTVAVTGHSLGGALASLAALALVQDKLVPSHRVFLYNFGSPRVGDKLYANTHDRLVPNSFRVVHYKDIVAHIPTRSPSLDPPHHHKTEIFYPMNMTPSSNYTVCIDDEDISCTDRWASMTLYRKCLANFSACRRIHVTYFGIIVPDICNDKKPTRAANGSKLWGKFSNNTCTRIPVGIL
1DT3	MGYP000712813175	156	100	4	74	224	8	156	1	1.304e-08	290	269	210	KLIVLSFRGSRSIENWIGNLNFDLKEINDICSGCRGHDGFTSSWRSVADTLRQKVEDAVREHPDY-RVVFTGHSLGGALATVAGADL----RGNGYDIDVFSYGAPRVGNRAFAEFLTVQTGGTLYRITHTNDIVPRLPPREFGYSHSSPEYWIKS	DYLCMAFRGTDEIADWIDNANVFPEQV----LFGDFHRGFWYSLEDIWSGLFQCYLDLRVAKKRPRPLFITGHSLGGAMATVAAAKLIHQDRPFIS---AYTFGQPRTMSKETSYIFDIEAKARFFRFQNNNDLVTRVPARLMGYNHVGSSIYISE	0.462,5.544,12.627,-3.095,5.610,14.050,-5.598,3.068,15.127,-9.068,4.494,14.497,-11.965,2.992,16.431,-15.428,3.074,14.725,-18.664,1.348,15.975,-18.488,-1.327,13.304,-14.810,-1.610,12.383,-11.141,-0.869,13.287,-8.814,0.946,10.874,-5.000,0.810,11.078,-3.832,3.977,9.219,-0.218,4.808,8.291,1.038,8.208,7.224,3.682,8.956,4.530,6.684,11.257,4.756,6.429,15.031,4.379,9.726,15.028,2.522,9.381,12.626,-0.361,…	AALIEHEDYLCMAFRGTDEIADWIDNANVFPEQVLFGDFHRGFWYSLEDIWSGLFQCYLDLRVAKKRPRPLFITGHSLGGAMATVAAAKLIHQDRPFISAYTFGQPRTMSKETSYIFDIEAKARFFRFQNNNDLVTRVPARLMGYNHVGSSIYISEEGSLYNDPGLWFRFLDSVEGAVDAVSQYKIDAIDDHNMKHYIKAVGKWDFQTME
1DT3	MGYP000715590179	152	97	7	75	210	15	166	1	6.062e-10	323	269	177	LIVLSFRGSRSIENWIGNLNFDL-----KEIND---ICSG--CRGHDGFTSSW-RSVA-DTLRQKVEDAVREHPDYRVVFTGHSLGGALATVAGADLR-GN---GYDIDVFSYGAPRVGNRAFAEFLTVQTGGTLYRITHTNDIVPRLPPRE	YIAVVYAGTDDFRNMMTDTDILTKVFGPTGENGTHPLAPSDDILVHAGFNNAVFRNGLFDRIKDMVNGIKGDFPDYRLMTTGHSLGAADSVLTAVALKLQDTWSDELVLSLNFGCPKTGNRAWGDFVNSMDGLGIWRVVNGIDLVPRLPPRF	-8.254,11.201,4.361,-10.160,9.030,6.546,-13.651,7.985,5.622,-16.313,6.121,7.504,-18.698,4.392,5.366,-21.687,2.704,6.624,-22.975,0.364,4.338,-26.498,0.874,5.012,-27.960,-1.837,3.363,-27.287,-4.953,4.640,-25.895,-5.319,7.815,-22.676,-4.877,6.389,-19.916,-3.893,8.426,-18.795,-0.402,7.814,-15.329,0.392,6.516,-12.558,2.492,7.952,-11.065,3.785,4.702,-7.528,5.279,4.513,-7.329,7.198,1.264,-4.070,8.400,-0…	VLILSKDAQDGHQGYIAVVYAGTDDFRNMMTDTDILTKVFGPTGENGTHPLAPSDDILVHAGFNNAVFRNGLFDRIKDMVNGIKGDFPDYRLMTTGHSLGAADSVLTAVALKLQDTWSDELVLSLNFGCPKTGNRAWGDFVNSMDGLGIWRVVNGIDLVPRLPPRFKLHHVGHTLQL
1DT3	MGYP000718307736	181	105	9	94	259	4	167	1	3.856e-09	291	269	181	NFDLKEINDICS-GCRGHDGFTSSWRSVADTLRQKVEDAVREHPDYRVVFTGHSLGGALATVAGADLRGN--GYDIDVFSYGAPRVGNRAFAEFLTVQTGGTLYRITHTNDIVPRLPPR-EFGYSHSSPEYWIKSGTLVPVTRND-IVKIEGIDATGGNNQPN----------IPDIPAHL	EVIQVPYQTFPECNCKVHTGFYKSAKNIYSQVYSSVRDILDVYPSYSVLVTGHSYGAAVAQLVAMELLSSKIVSSVY--NYGQPRIGNPAYAKFVNAK-KLDLWRFTHHKDMVPHVPPITELNYYHSCREVYEDQ--------NHALQM------CSAMEGEDPKCADQFALYQTDTADHH	-7.887,-3.286,-15.777,-4.592,-2.059,-14.799,-4.394,0.405,-17.385,-7.123,2.385,-16.195,-5.343,4.710,-13.977,-8.757,6.081,-13.256,-9.755,7.197,-9.789,-13.241,6.247,-8.256,-14.934,7.486,-5.073,-13.857,5.451,-2.025,-17.267,4.144,-1.076,-16.107,2.320,2.151,-15.540,5.667,3.856,-17.741,8.226,2.084,-16.779,10.838,4.761,-13.216,10.871,3.409,-14.421,12.599,0.094,-11.435,10.726,-1.415,-10.702,8.636,-4.541,-…	DDAEVIQVPYQTFPECNCKVHTGFYKSAKNIYSQVYSSVRDILDVYPSYSVLVTGHSYGAAVAQLVAMELLSSKIVSSVYNYGQPRIGNPAYAKFVNAKKLDLWRFTHHKDMVPHVPPITELNYYHSCREVYEDQNHALQMCSAMEGEDPKCADQFALYQTDTADHHIYLNHALDCDASTV
1DT3	MGYP000719503373	224	141	7	15	227	2	199	1	3.625e-09	268	269	223	QYSAAAYCGKNNDAP------AGTNITCTGNACPEVEKADATFLYSFEDSGVGDVTGFLALDNTNKLIVLSFRGSRSIENWIGN----LNFDLKEINDICSGCRGHDGFTSSWRSVADTLRQKVEDAVREHPDYRVVFTGHSLGGALATVAGADLR-GNGYDIDVFSYGAPRVGNRAFAEFLTVQTGGTLYRITHTNDIVPRLPPREFGYSHSSPEYWIKSGTL	RRLALFILRGNKKMKPWELYNYQENLDYKTN------TFDYDW--------------RVKIDSEEKIIYVFSQFSTSVIDWIVNFLFFFIPQVRQW----YLYFACFGWQTTFNSCKGLFMNEVLTAMNTFPDYKVVCCGHSYGGAGSVLAGIEIFFQSGKKPDLITFGAPKPLVFLFTKLISRIFFGKVTQYAHQSDIVTYLPP--LPWYWNVKVIRIGKFSL	0.545,4.940,13.723,4.066,4.959,14.778,4.037,1.325,15.800,2.639,0.470,12.493,5.194,2.348,10.481,7.972,0.812,12.378,6.446,-2.453,11.883,6.056,-2.056,8.213,9.488,-0.777,7.724,11.524,-2.916,9.939,10.293,-5.986,8.872,10.356,-7.988,11.823,13.885,-8.034,11.614,14.324,-6.005,14.419,11.438,-5.869,16.277,12.100,-7.069,19.563,9.872,-9.834,20.234,8.290,-7.981,22.824,7.060,-5.879,20.488,5.265,-8.556,19.339,3.…	MRRLALFILRGNKKMKPWELYNYQENLDYKTNTFDYDWRVKIDSEEKIIYVFSQFSTSVIDWIVNFLFFFIPQVRQWYLYFACFGWQTTFNSCKGLFMNEVLTAMNTFPDYKVVCCGHSYGGAGSVLAGIEIFFQSGKKPDLITFGAPKPLVFLFTKLISRIFFGKVTQYAHQSDIVTYLPPLPWYWNVKVIRIGKFSLKGLFNPKKYHCIYGDESIYKNIKG
1DT3	MGYP000721580438	162	98	7	94	241	1	162	1	2.487e-09	280	269	173	NFDLKEINDICSGCRGHDGFTSSWR-SVA-DTLRQKVEDAVREH-PDY--RVVFTGHSLGGALATVAGADL-----RGN---GYDIDVFSYGAPRVGNRAFAEFLTVQTGGTLYRITHTNDIVPRLPPREFGYSHSSPEYWIKSGTLVPVTRN-DIVKIEGI	DWPVVNITNGTAGMRVHSGFFHAWNATQLKPNVTQSVVKMLNASVPTDSRELHITGHSLGAAIATFCAVDLATMLASIPGFEHVPVYLWTYGSPRVGNAKFALFVEKLLSHRSMRMTHHKDIVPSLPPEYLGFHHVSREVWQHPMQLPPISPTITSPTIYEI	21.026,-6.477,-0.974,17.250,-6.598,-0.892,16.553,-9.225,1.534,13.217,-11.011,1.515,11.028,-12.655,4.177,8.350,-15.209,3.670,5.049,-14.213,5.114,3.137,-17.238,6.229,-0.277,-15.932,6.059,-1.398,-18.933,4.415,-0.291,-18.167,1.032,2.734,-19.948,-0.067,5.371,-17.914,-1.699,4.487,-14.336,-0.679,7.815,-12.403,-0.192,8.266,-8.986,1.191,11.221,-6.526,1.667,12.777,-7.577,5.002,13.847,-4.046,6.066,10.299,-2…	DWPVVNITNGTAGMRVHSGFFHAWNATQLKPNVTQSVVKMLNASVPTDSRELHITGHSLGAAIATFCAVDLATMLASIPGFEHVPVYLWTYGSPRVGNAKFALFVEKLLSHRSMRMTHHKDIVPSLPPEYLGFHHVSREVWQHPMQLPPISPTITSPTIYEICDGSGEDLACH
1DT3	MGYP000725333020	241	127	21	1	224	1	186	1	1.471e-06	168	269	204	EVSQDLFNQFNLFAQYS--AAAYCGKNNDAPAGTNITCTGNACPEVEKADATFLYSFEDSGVGDVTGFLALDNTNKLIVLSFRGSRSIENWIGNL-NFDLKEINDICSGCRGHDGFTSSWRSVADTLRQKVEDAVREHPDYRVVFTGHSLGGALATVAGA-----DLRGNGYDI-DVFSYGAPRVG----NRAFAEFLTVQTGGTLYRITHTN--DIVPRLPPR--EFGYSHSSPEYWIKS	MKGVSLRKYCHHLCERSYLSADRLGQGE--TL----HTFDN-----------------------MIVLRHER--DEFVALVPRGSDSWADWLQNFYVWPHKKFAGV---GRFHRGY--GKK-IAKHL-PELEKLV--DPRKRLTLAGHSAGGGEAVNFAAVTQYLDL------IDQTVTFGTPKTVARIYNPSHEQWLR--SVT----THYLNPFDMVTQVPFGMARIG--KEV-VKGIRK	2.291,3.555,18.635,2.048,6.821,16.887,4.090,8.943,14.471,7.583,8.093,13.245,7.840,4.936,15.384,4.891,3.418,13.626,6.057,4.336,10.148,9.477,2.825,10.769,7.620,-0.167,12.135,5.484,-0.355,8.952,8.691,-0.382,6.856,10.022,-3.277,9.014,6.720,-5.172,8.484,7.076,-4.632,4.753,10.558,-6.263,4.944,9.094,-9.102,6.953,6.377,-9.715,4.345,9.163,-10.866,1.951,10.358,-13.507,4.382,9.278,-17.102,4.415,6.784,-18.18…	MKGVSLRKYCHHLCERSYLSADRLGQGETLHTFDNMIVLRHERDEFVALVPRGSDSWADWLQNFYVWPHKKFAGVGRFHRGYGKKIAKHLPELEKLVDPRKRLTLAGHSAGGGEAVNFAAVTQYLDLIDQTVTFGTPKTVARIYNPSHEQWLRSVTTHYLNPFDMVTQVPFGMARIGKEVVKGIRKSSGSEHPLPVYAEFFADV
1DT3	MGYP000728228187	220	146	9	1	210	6	200	1	8.093e-09	275	269	298	EVSQDLFNQFNLFAQYSAAAYCGKNNDAPAGTNITCTGNACPEVEKA--DATFLYSFEDSGVGDVTGFLALDNTNKLIVLSFRGSRSIENWIGNLNFDLKEINDIC-SGCRGHDGFTSSWRSVADTLRQKVEDAVREHPDYRVVFTGHSLGGALATVAGADLR---GNGYDIDVFSYGAPRVGNRAFAEFLTVQT----GGTLYRITHTNDIVPRLPPRE	NVDKSEIEELTYYNIFAIVAY------------KRNPTSMLMRCARVNED-DIIMRNWEANVNKPSFYVVRDRERKALVLGIRGIASVADVLTTFNTNVTKLDQTCSSGSEMHSGMVASAVYISEMTVNTITDELKHNPTYSLVIVGHSMGGGVAAILGSMWKQRFKNRVRSI--TYGCPRVF--------PMADDNYGNVVSV--VHEDDPLMSICVRN	-3.614,25.256,-3.683,-5.268,22.010,-2.898,-8.441,22.099,-1.111,-7.780,21.161,2.310,-10.316,18.808,3.304,-11.198,19.302,6.824,-10.776,15.929,8.082,-12.476,15.471,11.414,-10.403,14.424,14.432,-12.184,11.122,14.660,-11.301,10.251,11.074,-7.633,11.077,11.789,-7.726,8.896,14.882,-9.191,6.097,12.843,-6.708,6.442,9.966,-3.908,6.457,12.570,-5.248,3.308,14.156,-5.437,1.406,10.836,-1.876,2.548,10.018,-0.74…	QRPQTNVDKSEIEELTYYNIFAIVAYKRNPTSMLMRCARVNEDDIIMRNWEANVNKPSFYVVRDRERKALVLGIRGIASVADVLTTFNTNVTKLDQTCSSGSEMHSGMVASAVYISEMTVNTITDELKHNPTYSLVIVGHSMGGGVAAILGSMWKQRFKNRVRSITYGCPRVFPMADDNYGNVVSVVHEDDPLMSICVRNVIAVRDALLELCLDKNFQAEILKRTSLMLKCIDVKDAFDVYLVDYVKYFPDDRDGYELDGSGGHTMKCRGTGHWWLAPSCRQNPNKCAPFITDPSTWG
1DT3	MGYP000733401442	165	95	7	79	239	1	147	1	5.522e-09	290	269	194	SFRGSRSIENWIGNLNFDLKEINDICSGCRGHDGFTSSWRSVADTLRQKVEDAVREHPDYRVVFTGHSLGGALATVAGADL----RGNGYDIDVFSYGAPRVGNRAFAEFLTVQTGGTLYRITHTNDIVPRLPPREFGYSHSSPEYWIKSGTLVPVTRNDIVKIE	AFRGSESPQDWVTNLNMATDPG--PFQRTRVHEGFQKALLSVMMDL----TEAVVQHQK-SLWITGHSLGAALATILTGMYLERDRAVHC---LYTFGSPRVGNENFRTEFNSRFLRQAYRVVNGHDLVPHVPP-EPLFSHVGQSIIFDA-------EGKRHQGE	3.707,-3.485,11.580,4.688,-4.994,8.197,8.180,-4.780,6.802,9.015,-4.263,3.116,11.106,-6.546,0.932,14.861,-6.709,1.335,15.117,-6.068,-2.359,12.535,-3.649,-3.583,14.078,-3.612,-7.076,13.812,-7.280,-7.667,10.385,-7.119,-6.349,9.219,-4.320,-8.765,10.782,-6.143,-11.706,9.082,-9.402,-10.871,5.739,-7.976,-10.185,3.241,-10.129,-11.949,-0.127,-8.608,-12.917,-2.242,-11.517,-11.764,-5.192,-10.903,-9.482,-6.9…	AFRGSESPQDWVTNLNMATDPGPFQRTRVHEGFQKALLSVMMDLTEAVVQHQKSLWITGHSLGAALATILTGMYLERDRAVHCLYTFGSPRVGNENFRTEFNSRFLRQAYRVVNGHDLVPHVPPEPLFSHVGQSIIFDAEGKRHQGELTFWEKLQMDIKGRLLQDWGDGRLSAVERHLLDDDDGYLPRLLQDLS
1DT3	MGYP000739631673	223	131	6	1	208	30	236	1	1.443e-13	422	269	244	EVSQDLFNQFNLFAQYSAAAYCGKNNDAPAGTNITCTGN------ACP--EVEKADATFLYSFEDSGVGDVTGFLALDNTNKLIVLSFRGSRSIENWIGNLNFDLKEINDICSGCRGHDGFTSSWRSVADTLRQKVEDAVREHPDYRVVFTGHSLGGALATVAGA-------DLRGNGYDIDVFSYGAPRVGNRAFAEFLTVQTGGTLYRITHTNDIVPRLPP	TLGQPSLQDAHYYMYFSGAAY--------------CYGSDLFNAWTCKYCEATGPNVHLYATLY-NATTQVAGMINVNDVNQTIILTFRGSYAAQNFVVDLDFAPVPWAGVNPSVRVHEGFLGYLNSIYGQVRSSLLPLVAAHPDYKIVVGGHSLGSSLATLTLIRLLTTETEFERRATDFSLFAYAPPRVGDVAFAQWANSL-GFECARIVHYADIVPHIPP	30.841,3.301,-17.311,28.929,6.005,-15.622,30.897,7.024,-12.660,28.941,6.453,-9.659,29.801,9.554,-7.900,30.769,9.075,-4.388,28.096,10.144,-2.176,29.600,12.104,0.596,30.127,9.998,3.489,28.472,11.866,6.081,30.238,11.318,9.353,28.425,8.856,11.325,28.362,11.280,14.116,25.918,13.416,12.503,23.596,10.737,12.351,23.678,9.969,15.939,22.237,13.159,16.900,19.457,12.957,14.591,18.295,9.826,16.049,17.719,10.9…	HRDLHSFPTRRSSDLATAFNSPVQIPTNNTLGQPSLQDAHYYMYFSGAAYCYGSDLFNAWTCKYCEATGPNVHLYATLYNATTQVAGMINVNDVNQTIILTFRGSYAAQNFVVDLDFAPVPWAGVNPSVRVHEGFLGYLNSIYGQVRSSLLPLVAAHPDYKIVVGGHSLGSSLATLTLIRLLTTETEFERRATDFSLFAYAPPRVGDVAFAQWANSLGFECARIVHYADIVPHIPPGNPSRSEE
1DT3	MGYP000743034170	221	129	14	8	219	3	186	1	1.085e-08	252	269	234	NQFNLFAQYSAAAYCGKNNDAPAGT-NITCTGNACPEVEKADATFLYSFEDSGVGDVTGFLALDNTNKLIVLSFRGSRSIENWIGNLNF--DLKEINDICSGCRGHDGFTSSWRSVADTLRQKVEDAVR-EHPD-YRVVFTGHSLGGALATVAGADLRGNGYDI-DVFSYGAPRVGNRAFAEFLTVQTGGTLYRITHTNDIVPRLPPREF--GYSH-SSPE	LLLLSCAILSSWVYNPHTRDIPLGVFNPVII---------ADR-------------VTLFES----DDSCVVAYRGTDSFQDLFDDLMAQTDQHCDHED--GFV--QEFLKSFDEIKYETHQEIEKRLKSDKCNNKKIYFTGHSLGAAMAIVAPVEY--GIEDFEKIITFGGPKVCCFDFTMGNE-----KILRVVNNKDPIPALPEPFEVRDLQHCGSHV	-2.966,-12.640,9.826,-5.835,-13.185,7.365,-8.216,-10.715,9.035,-5.464,-8.081,9.181,-4.874,-8.563,5.386,-8.555,-8.036,4.695,-8.668,-5.013,7.060,-5.664,-3.383,5.327,-7.255,-4.047,1.897,-10.555,-2.440,3.047,-8.668,0.575,4.512,-6.631,0.851,1.228,-9.916,0.875,-0.655,-11.611,3.415,1.738,-8.869,6.101,1.163,-10.058,6.347,-2.508,-13.560,7.410,-1.340,-13.516,8.588,2.304,-17.018,9.989,2.067,-18.869,7.138,0.…	MSLLLLSCAILSSWVYNPHTRDIPLGVFNPVIIADRVTLFESDDSCVVAYRGTDSFQDLFDDLMAQTDQHCDHEDGFVQEFLKSFDEIKYETHQEIEKRLKSDKCNNKKIYFTGHSLGAAMAIVAPVEYGIEDFEKIITFGGPKVCCFDFTMGNEKILRVVNNKDPIPALPEPFEVRDLQHCGSHVVALPSKKEIDDFQWPTLKENYDIFDHRIEEYIKNLRGYINNIRSIKLY
1DT3	MGYP000745534389	284	167	14	1	268	43	300	1	1e-17	528	269	317	EVSQDLFNQFN-LFAQYSAAAYCGKNNDAPAGTN-ITC-TGNACPEVEKADATFLYSFEDSGVGDVTGFLALDNTNKLIVLSFRGSRSIENWIGNLNFDLKEINDICSGCRGHDGFTSSWRSVADTLRQKVEDAVREHPDYRVVFTGHSLGGALATVAGADLR-GN---GYDIDVFSYGAPRVGNRAFAEFLTVQTGGTLYRITHTNDIVPRLPPREFGYSHSSPEYWIKSGTLVPVTRNDIVKIEGIDATGGNNQPN---------IPDIPAHLWYFGLIGTC	ALATIADAQYYALYALGANYCY---------GSPLLTNWTCGPCRKLGPS-VRFYST-LYNASTGVAGFITLDEEAEEIAVTFRGSYAAQNFVLDLMTTPVPFVGVNEDVRVHQGYLLCLNSIYDQLRAKLQALNTDHPDYRIVFSGHSLGAAVATLALLKTRSEAAFRARTFAHFSYGEPRLGDHTFAQWVNA-MNWTAARVVNYDDVVPHIFPPTDVYTHFGTEFWIES--LGS---NATRI------CGRSTTEDSTCSNSVAPLYNILEHLSYY---GNS	27.620,9.137,-2.174,27.464,11.273,-5.098,28.406,8.619,-7.593,25.669,6.388,-6.562,23.247,9.174,-6.897,24.327,9.999,-10.343,24.209,6.395,-11.535,20.785,6.093,-10.252,19.555,9.241,-11.847,20.925,8.262,-15.192,19.261,4.946,-15.089,16.039,6.512,-14.173,16.174,8.986,-16.930,16.971,6.372,-19.404,14.092,4.407,-18.240,11.838,7.258,-18.420,12.935,8.043,-21.791,12.283,4.623,-22.832,8.812,4.746,-21.645,8.180…	MDTIRETLQQRLSATLDAIGLLDPVDAAAFNNPVPVSTTQSLALATIADAQYYALYALGANYCYGSPLLTNWTCGPCRKLGPSVRFYSTLYNASTGVAGFITLDEEAEEIAVTFRGSYAAQNFVLDLMTTPVPFVGVNEDVRVHQGYLLCLNSIYDQLRAKLQALNTDHPDYRIVFSGHSLGAAVATLALLKTRSEAAFRARTFAHFSYGEPRLGDHTFAQWVNAMNWTAARVVNYDDVVPHIFPPTDVYTHFGTEFWIESLGSNATRICGRSTTEDSTCSNSVAPLYNILEHLSYYGNSVLDCPAEDPVNALLQLA
1DT3	MGYP000745932489	213	133	11	10	207	10	198	1	3.565e-08	227	269	212	FNLFAQYSAAAYCGKNNDAPAGTNITCTGNA-----CPEVEKADATFLYSFEDSGV-GDVTGFLALDNTNKLIVLSFRGSRSIENWIGNLNFDLKEINDICSGCRGHDGFTSSWRSVADTLRQKVEDAVREHPDYRVVFTGHSLGGAL------ATVAGADLRGNG-YDIDVFSYGAPRVGNRAFAE--FLTVQTGGTLYRITHTNDIVPRLP	VVFGFEMAKIAY------------VDPTGKVPKALEQPGIG-----FKEVRAFDSKKTDTQAFIAVTPDEKGIVIAFRGTTPGKDILTDLSVSFDDF-AL--GGQAHEGFQDYVGGVKKLIYEHLEKVMRLYPDAKIFGAGHSLGAAAIVNFIGTALGESVIEAAQVGRVVL--AGCPRGFDREAARLFNKLIRARVNRC--VNASDIVTKLP	-8.732,-20.745,4.563,-8.645,-17.084,4.680,-11.334,-16.688,7.241,-9.071,-17.703,9.879,-6.334,-15.574,8.995,-5.559,-12.981,11.472,-5.135,-9.751,9.629,-2.170,-9.324,11.877,-0.480,-12.175,10.266,2.200,-11.783,7.536,0.540,-14.647,5.501,-2.681,-12.615,5.365,-0.761,-9.666,3.879,0.815,-11.932,1.167,-2.634,-13.259,0.214,-3.980,-9.698,-0.102,-0.919,-8.714,-2.151,-1.536,-11.712,-4.427,-5.307,-10.873,-4.763,…	ALHRIDPSNVVFGFEMAKIAYVDPTGKVPKALEQPGIGFKEVRAFDSKKTDTQAFIAVTPDEKGIVIAFRGTTPGKDILTDLSVSFDDFALGGQAHEGFQDYVGGVKKLIYEHLEKVMRLYPDAKIFGAGHSLGAAAIVNFIGTALGESVIEAAQVGRVVLAGCPRGFDREAARLFNKLIRARVNRCVNASDIVTKLPALLASVVASLLALF
1DT3	MGYP000747654413	221	138	10	1	207	65	261	1	3.204e-09	276	269	301	EVSQDLFNQFNLF-AQYSAAAYCGKNNDAPAGTNITCTGNACPEVEKADATFLYSFEDSGVG-----DVTGFLALDNTNKLIVLSFRGSRSIENWIGNLNFDLKEINDI--CSGCRGHDGFTSSWRSVADTLRQKVEDAVREHPDYRVVFTGHSLGGALATVAGADLRG------NGYDIDVFSYGAPRVGNRAFAEFLTVQTGGTLYRITHTNDIVPRLP	EFDRN--NASSLLTLNLDVSIWSGCQDVLPNINN---------------FNIVETYEGYDYAAGFNRNI-AALYYSKILNIAIISFSGTMYLTEWANDFDFSQTNPNSITGDNNILVHEKDYIMYNTFRNNFLSTIKKI--KNDTTTLVVTGHSLGGALATICFLDVISNNIIPVGFRTLY--TFGAPRVGNIAFADIINKEK--AQFRVVNTEDIITDLP	49.545,45.570,-32.153,49.088,43.417,-29.158,48.675,39.931,-30.643,46.238,38.533,-28.143,47.314,34.945,-27.959,44.706,33.001,-30.001,45.009,30.437,-27.233,42.694,32.300,-24.907,39.638,32.222,-26.795,39.057,28.638,-26.589,39.419,28.432,-22.807,36.891,31.167,-22.159,34.291,29.463,-24.231,34.767,26.217,-22.335,34.450,28.030,-18.944,31.254,29.794,-20.128,29.720,26.467,-21.291,30.663,24.827,-17.945,29.…	MFKVPWIFIPISIIYFIIITIIAIILFIKYILNYFKKQLVVDMKKICEKQIKEIKPITPFKNIFEFDRNNASSLLTLNLDVSIWSGCQDVLPNINNFNIVETYEGYDYAAGFNRNIAALYYSKILNIAIISFSGTMYLTEWANDFDFSQTNPNSITGDNNILVHEKDYIMYNTFRNNFLSTIKKIKNDTTTLVVTGHSLGGALATICFLDVISNNIIPVGFRTLYTFGAPRVGNIAFADIINKEKAQFRVVNTEDIITDLPLPIDGNKIYEQTITNSGTVFSLNLGDYESNHINSYIEFLK
1DT3	MGYP000748917413	230	121	13	1	194	3	210	1	5.909e-05	144	269	210	EVSQDLFNQFNLFAQYSAAAYC---------------GKNNDAPAGTNITCTGNACPEVEK-----ADATFLYS--FEDSGVGDVTGFL----------ALDNTNKLIVLSFRGSRSIENWIGNLNFDLKEINDICSG---CRGHDGFTSSWRSVADTLRQKVEDAVREHPDYRVVFTGHSLGGALATVAGADLRGNGYDIDVFSYGAPRVGNRAFAE-FLTVQTGGTLY	SVTIGKSNQNEMALNLAHASSIVYRLVDKKLLHQIYIEK---HP-LKNV---ESVIQSELKKYTTFTDVTNVKKKIIGHST------FLVCCEVTYKNVTVP----LVI--FMGTVEYAQWMVDLKIGWKMGAEFAPNTPKVNMHRGFYNSYKSVKEFVHNYVK---RNSYNGQVLVCGHSLGGALACTCTLDLALNGLRPIGFTYGAPRVGDLTFQNAYKQYRVRLFQY	-5.895,-10.974,20.452,-7.860,-11.289,17.213,-5.983,-11.141,13.959,-7.554,-10.542,10.598,-7.515,-13.968,9.343,-7.898,-13.631,5.685,-8.975,-17.117,4.912,-9.637,-18.396,1.415,-13.305,-17.708,2.074,-12.752,-14.042,2.666,-9.811,-13.411,0.290,-12.075,-12.362,-2.645,-14.218,-10.066,-0.422,-11.031,-8.402,0.947,-9.577,-8.209,-2.598,-12.744,-6.381,-3.796,-12.771,-3.996,-0.780,-9.116,-3.109,-1.339,-9.760,-2…	MKSVTIGKSNQNEMALNLAHASSIVYRLVDKKLLHQIYIEKHPLKNVESVIQSELKKYTTFTDVTNVKKKIIGHSTFLVCCEVTYKNVTVPLVIFMGTVEYAQWMVDLKIGWKMGAEFAPNTPKVNMHRGFYNSYKSVKEFVHNYVKRNSYNGQVLVCGHSLGGALACTCTLDLALNGLRPIGFTYGAPRVGDLTFQNAYKQYRVRLFQY
1DT3	MGYP000765893905	240	134	15	12	206	14	224	1	0.002262	111	269	262	LFAQYSAAAYCG-KNNDAPAGTNI-----------------------------TCTGNACPEVEKAD-------ATFLYSFEDSGVGDVTGFLALDNTNKLIVLSFRGSRS---IENWIGNLNFDLKEINDICSGCRGHDGFTSSWRSVADTLRQKVEDAVREHPDY-RVVFTGHSLGGALATVAGADLRGNG-YDIDVFSYGAPRVGN---RAFAEFLTVQTGGTLYRITHTNDIVPRL	QLLLLDTIIYSLDREAPAETGVSVACLITDIDTGIKERMAQRGCTMDNLLAEQMSYANWFAVVDAVRRDPVLCALRLDAYCMD--ERGAKMACFADAAH-RAYAIFAGTGAGEWDDNCIAGYMAD-------------TEQQ--------LRALDWFEKDVATK-HYSHVVASGHSKGGNKAMYLSVHA-GDALDEAV--SFDGQGFSREFLAAYADDIARNAG-KIRAYALDNDFVNGL	-25.402,-7.575,19.443,-23.743,-4.871,17.582,-25.125,-4.657,14.187,-22.359,-5.644,11.865,-21.596,-2.563,10.230,-22.937,-2.573,6.755,-19.824,-0.697,5.701,-18.464,-2.064,2.449,-14.828,-3.151,2.162,-12.586,-0.704,0.297,-12.566,-1.113,-3.458,-9.295,-1.078,-5.574,-9.678,2.646,-6.292,-9.987,3.523,-2.569,-6.875,1.368,-1.830,-4.988,3.207,-4.562,-5.960,6.575,-2.967,-4.481,5.341,0.383,-1.329,4.171,-1.549,-1…	MARESDTPALDDAQLLLLDTIIYSLDREAPAETGVSVACLITDIDTGIKERMAQRGCTMDNLLAEQMSYANWFAVVDAVRRDPVLCALRLDAYCMDERGAKMACFADAAHRAYAIFAGTGAGEWDDNCIAGYMADTEQQLRALDWFEKDVATKHYSHVVASGHSKGGNKAMYLSVHAGDALDEAVSFDGQGFSREFLAAYADDIARNAGKIRAYALDNDFVNGLLNPISRRLPCCTARNRHRIGWYCAMPARKASWAEAPST
1DT3	MGYP000845372354	183	116	6	51	231	29	192	1	1.307e-10	326	269	239	FLYSFEDSGVGDVTGFLALDNTNKLIVLSFRGSRSIENWIGNLNFDLKEINDICSGCRGHDGFTSSWRSVADTLRQKVEDAVREHPDY-RVVFTGHSLGGALATVAGADLRGNGYDI-DVFSYGAPRVGNRAFAEFLTVQTGGTLYRITHTNDIVPRLPPREFGYSHSSPEYWIKSGTLVPVT	VLETDT-----QVQV---AERTPGEVWVIFPGTASAQDWLTDLKVRKIAW----GETRAHRGFATAFRSVAGPL-------LAHLKSARQIIITGHSLGGALATLAADLCSEAGLPVAAVYTFGSPRVGNGPFARAYNARLAHCTFRVVNARDPVPHVPWLLGTYRHVDTQVYLNANGFAVIA	-10.290,10.773,8.590,-8.409,13.636,6.994,-5.110,12.909,5.133,-2.200,13.615,7.552,1.001,14.680,5.703,2.937,13.903,8.962,1.572,10.314,9.150,2.343,9.924,5.397,5.976,10.987,6.071,6.255,8.548,8.991,4.800,5.663,6.909,7.221,6.503,4.038,10.222,6.638,6.477,9.362,3.208,7.931,9.150,1.751,4.426,12.434,3.525,3.346,14.120,2.116,6.486,13.073,-1.475,5.456,14.723,-1.013,2.081,18.032,0.211,3.676,18.165,-2.095,6.40…	MIFSKQLAIECAELIDQLYRSNFEPTFNVLETDTQVQVAERTPGEVWVIFPGTASAQDWLTDLKVRKIAWGETRAHRGFATAFRSVAGPLLAHLKSARQIIITGHSLGGALATLAADLCSEAGLPVAAVYTFGSPRVGNGPFARAYNARLAHCTFRVVNARDPVPHVPWLLGTYRHVDTQVYLNANGFAVIAEPLRVAALELAQTLGTATQQQAARAALDVARPHHIGSYLQKLKGLHA
1DT3	MGYP000845535496	142	102	7	77	206	2	136	0.505	0.6251	51	269	236	VLSFRGSRSIENW-----IGNLNFDLKEINDICSGCRGHDGFTSSWRSV---ADTLRQKVEDAVREHPDYRVVFTGHSLGGALATVAGADLRGNGYDIDVF-SYGAPRVGNRAFAEFLTVQ---TGGTLYRITHTNDIVPRL	FFALWGNRRAALYGALGMLESISTAVVLFMEWDSG---AWYTVQGMKEPVLGADREAALVAGMRFVNPDAWQEGWAHSLGTTMVTTNQIHNPGVFDHLTLFGS-AGI---TESAAKALAAQIADETVSVSAASSGLDPIAWM	-5.005,-12.744,4.395,-4.268,-11.279,1.109,-1.003,-10.041,-0.236,-0.165,-8.266,-3.075,3.429,-8.219,-3.127,5.427,-6.677,-5.482,8.672,-8.111,-6.384,10.761,-10.950,-6.096,10.674,-11.062,-2.755,8.418,-13.567,-1.349,10.589,-14.757,1.106,10.924,-11.853,3.304,7.402,-11.332,3.921,6.732,-14.810,4.262,9.311,-14.890,6.767,7.899,-12.058,8.569,4.502,-13.392,8.460,5.539,-16.804,9.139,6.129,-15.592,12.455,2.548,…	LFFALWGNRRAALYGALGMLESISTAVVLFMEWDSGAWYTVQGMKEPVLGADREAALVAGMRFVNPDAWQEGWAHSLGTTMVTTNQIHNPGVFDHLTLFGSAGITESAAKALAAQIADETVSVSAASSGLDPIAWMGRTDLSTHPVDPKTVEGVTEIGSHGGAVENYLNADGREVTGAATQGHNAGSSTEIIYRIHRAPYWHLGFIPEESVGYLDPRSEAMMQAVADFAERVEARQ
1DT3	MGYP000848903848	163	95	6	89	248	1	151	1	2.205e-11	374	269	187	WIGNLNFDLKEINDICSGCRGHDGFTSSWRSVADTLRQKVEDAVREHPDYRVVFTGHSLGGALATVAGADLR---GNGYDIDVFSYGAPRVGNRAFAEFLTVQTGGTLYRITHTNDIVPRLPPREFGYSHSSPEYWIKSGTLVPVTRNDIVKIEGIDATGGNN	WIINLSTNMVAYPK-CSNCKVHNGFYTAWNQAKSTVNAQIQNLLSLHRGVPIYVTGHSLGGALATLAVGDLKETFGNIAS--LLTFGQPRVGNKEFAAYFA--SVIVANRVVHYADIVPHIPPSSFGFSHQGNEIWYDKAMST------YKSC-APEANTCSN	-3.060,5.682,-15.478,-3.700,9.278,-15.581,-5.463,9.303,-12.408,-2.359,8.295,-10.977,-0.629,11.306,-11.926,-2.415,13.925,-10.184,-0.521,15.213,-7.196,-3.701,16.634,-5.641,-4.302,15.616,-2.007,-7.741,15.670,-0.180,-8.435,15.636,3.541,-8.646,12.168,5.115,-11.332,12.384,7.818,-9.800,9.899,10.243,-6.896,11.966,11.565,-5.992,15.548,11.976,-4.101,17.122,8.980,-4.111,13.762,7.207,-4.278,14.049,3.375,-4.3…	WIINLSTNMVAYPKCSNCKVHNGFYTAWNQAKSTVNAQIQNLLSLHRGVPIYVTGHSLGGALATLAVGDLKETFGNIASLLTFGQPRVGNKEFAAYFASVIVANRVVHYADIVPHIPPSSFGFSHQGNEIWYDKAMSTYKSCAPEANTCSNSLPATSLNTGDHSMDTYITLPGSFFDRIIKDLTEAV
1DT3	MGYP000849614339	209	129	10	61	262	9	205	1	1.334e-12	421	269	213	GDVTGFLALDNTNKLIVLSFRGSRSIENWIGNLNFDL-KEINDICSGCRGHDGFTSSWRSVADTLRQKVEDAVREHPDYRVVFTGHSLGGALATVAG--ADLRGNGYDIDVFSYGAPRVGNRAFAEFLTVQTGGTLYRITHTNDIVPRLPPREFGYSHSSPEY-WIKSGTLVPVTRNDIVK-IEGIDATGGNNQ--PNIPDIPAHLWYF	TDIHGYVGYHKGINRIVVAWRGTIDARNWIEDFGFKKIPYIR--CRSCEVHAGFFASWESVANQTDKAVNGLLTKYPSAQIAVTGQSLGGALSTFAAIELQLKFNKVA-ELYNYGSPRVGNEHTAAFINLKLPT-RFRVVHNRDIVPHVPFEAMGFTHVSYEVLYDEE-------MKSYKVCNESGEDPSCSNRFDPD-YSFPDHDIYW	-3.026,-14.188,15.044,-3.629,-15.728,11.562,-0.853,-16.193,8.997,-1.749,-15.356,5.389,0.469,-16.654,2.691,0.741,-17.634,-0.980,3.892,-19.684,-1.634,3.588,-19.426,-5.460,3.799,-15.637,-5.309,5.908,-15.351,-2.066,3.218,-13.121,-0.505,3.105,-13.159,3.295,0.841,-11.343,5.737,-0.635,-11.397,9.274,-4.142,-10.774,10.641,-4.472,-10.325,14.435,-6.591,-8.668,17.092,-4.983,-6.078,19.446,-7.105,-5.990,22.586…	MVIINNNETDIHGYVGYHKGINRIVVAWRGTIDARNWIEDFGFKKIPYIRCRSCEVHAGFFASWESVANQTDKAVNGLLTKYPSAQIAVTGQSLGGALSTFAAIELQLKFNKVAELYNYGSPRVGNEHTAAFINLKLPTRFRVVHNRDIVPHVPFEAMGFTHVSYEVLYDEEMKSYKVCNESGEDPSCSNRFDPDYSFPDHDIYWIAMDDSVC
1DT3	MGYP000851188035	213	129	13	32	228	88	284	1	1.102e-08	250	269	318	TNITCTGNACPEVEKADATFLYSFE-DSGVGD-VTGFLALDNTNKL--IVLSFRGSRSIENWIGNLNFDLKEIN-DIC--SGCRGHDGFTSSWRSVADTLRQKVEDAVREHPDYRVVFTGHSLGGALATVAGADLR--GNGYDIDVFSYGAPRVGNRAFAEFLTVQTGGTLYRITHTNDIVPRLP----PREF---GYSHSSPEYWIKSGTLV	TNIILPSG---------VRLLDSFKIEGGESNFCTIFETTSMKG-LKTVWVNCRGSMESIDLEYDIETSSINIDDNQIRYGNVYIHSGFFKIYNMLLDRVRDVVLSEVDGG--GNVVVAGHSLGGAVATLLGLQLSYYHTTVAVY--STASPRIGNSPWASLCNDHGG--IWRIVNTVDLIPTLPLSVTPVKNTLQFYEHGGKLVTFTSNWFS	39.438,11.439,-26.716,37.354,10.195,-29.487,36.457,6.856,-27.983,35.157,8.417,-24.800,32.878,10.826,-26.604,31.339,7.975,-28.599,30.706,6.098,-25.362,28.945,9.070,-23.752,26.762,9.601,-26.819,25.741,5.937,-26.808,24.705,6.208,-23.119,22.615,9.343,-23.829,20.921,7.716,-26.790,20.180,4.668,-24.687,18.716,6.723,-21.838,16.532,8.726,-24.273,15.446,5.564,-25.931,14.544,3.942,-22.560,12.657,7.052,-21.4…	MSKYIIFVILIIITVIWVRQKMLKVINPLKNAFSNELKCKGEKCPAVEPIDLPPPNMSEWLPHVYDGEVAVYSCYLTNCMIRSIEKKTNIILPSGVRLLDSFKIEGGESNFCTIFETTSMKGLKTVWVNCRGSMESIDLEYDIETSSINIDDNQIRYGNVYIHSGFFKIYNMLLDRVRDVVLSEVDGGGNVVVAGHSLGGAVATLLGLQLSYYHTTVAVYSTASPRIGNSPWASLCNDHGGIWRIVNTVDLIPTLPLSVTPVKNTLQFYEHGGKLVTFTSNWFSLINNHVIANYFENLYLNHLDTHIKTSSQNGTKKN
1DT3	MGYP000851846935	137	91	6	53	168	8	139	0.179	2.15	38	269	304	YSFEDSGVGDVTGFLA-----LDNTNKLIVLSFRG-SRSIENWIGNLNF-----------DLKE----INDICSGCRGHDGFTSSWRSVADTLRQKVEDAVREHPDYRVVFTGHSLGGALATVAGADLRGNGYDIDV	RRIELRHADGSTSPLLLVESDRRDERRPAILVLPGIAVGARYYLPLARALAAEGVDVAITELRGQGESTHRIGRG--GVAGYHESAAE---DVPLALDAMRRALGDRRVILLGHSMGAQIGVYHLARRDPRVAGLVA	-31.831,-11.353,3.304,-28.474,-12.337,2.322,-26.343,-9.390,2.568,-25.392,-8.336,-0.782,-22.107,-9.639,-1.569,-21.265,-6.199,-2.923,-18.810,-4.027,-0.897,-20.159,-0.807,0.627,-18.664,2.039,-1.479,-17.483,5.215,0.377,-16.274,8.211,-1.638,-13.080,9.774,-0.220,-12.749,13.466,-1.110,-9.189,14.782,-1.225,-8.045,18.399,-0.564,-7.435,18.946,-4.343,-11.089,18.043,-5.041,-10.253,14.618,-6.476,-12.124,11.49…	MTKTDDPRRIELRHADGSTSPLLLVESDRRDERRPAILVLPGIAVGARYYLPLARALAAEGVDVAITELRGQGESTHRIGRGGVAGYHESAAEDVPLALDAMRRALGDRRVILLGHSMGAQIGVYHLARRDPRVAGLVAVAAQSPFHRGFPRPVGRKLRFGSVVLPVVGRLAGHVPGGFFGAEGRLPADRVRDWSRLAATGVMQPARADLDYLAGLTRVEVPVLSVVIAHDPLAPESAARGQGATLIRREILPAVDQYTEQAENFALAVLGEAPLPSGVEDAISQMKVLDAIFRSEKSGAWEAV
1DT3	MGYP000856790561	303	184	16	1	268	17	301	1	1.443e-13	421	269	308	EVSQDLFNQFNLFAQYSAAAYCG--KNNDAPAGTNITCTGNACPEVEKADATFLYSF-EDSGVGD-VTGFLALDNTNKLIVLSFRGSRSIENWIG------NLNFDLKEINDICSGCRGHDGFTSSWR-SVADTLRQKVEDAVREHPDYRVVFTGHSLGGALATVAGADLRG-NGYD---IDVFSYGAPRVGNRAFAEFLTVQTGGTLYRITHTNDIVPRLPP-----------------REF-GYSHSSPEYWIKSGTLVPVTRNDIVKIEGIDATGGNNQPNI--PDIPAHLWYFGLIGTC	SYDEKL---ARELVSIASISYCEQDEQITLSC-------GIHCDRLKEAGYTLLKSNTIQSTPFGGESYVIFYSKSKNRLVAAFRGTQNVLELLGEIFNSYSLEYELQPDVDD---ARVQGYFYTQYSVFMRTPFLEDMKAMKAKYPSADFFITGHSQGGAKATLAALDLVGSNVFKKDEFIVYTFGSPRVGNYEFAK-LYRKQGPKTYRVVNNNDMVPHFPPCYLDKGQCVQEPDFDESMLFWCPYHVDEEVFYTNSNMSNQA---YEFCS-NEDMRCSNKYSIFNGSILSHLQYFAEPVTC	-45.841,6.223,10.067,-42.723,7.579,8.523,-39.737,6.031,10.246,-36.986,8.558,10.215,-33.993,6.567,10.147,-31.660,8.514,12.176,-28.423,8.038,10.667,-26.035,8.391,13.293,-23.199,9.534,11.615,-20.680,8.570,13.848,-18.254,11.088,13.544,-15.561,9.126,13.615,-13.374,11.765,13.433,-11.840,9.968,10.980,-8.701,11.060,12.312,-7.365,13.173,9.738,-4.244,12.676,11.480,-1.570,9.920,11.166,-1.889,7.294,13.962,1.…	MVWAAIYFISNIGKGDSYDEKLARELVSIASISYCEQDEQITLSCGIHCDRLKEAGYTLLKSNTIQSTPFGGESYVIFYSKSKNRLVAAFRGTQNVLELLGEIFNSYSLEYELQPDVDDARVQGYFYTQYSVFMRTPFLEDMKAMKAKYPSADFFITGHSQGGAKATLAALDLVGSNVFKKDEFIVYTFGSPRVGNYEFAKLYRKQGPKTYRVVNNNDMVPHFPPCYLDKGQCVQEPDFDESMLFWCPYHVDEEVFYTNSNMSNQAYEFCSNEDMRCSNKYSIFNGSILSHLQYFAEPVTCSKTPMRI
1DT3	MGYP000857535082	203	122	12	49	212	108	295	0.933	0.06788	70	269	399	ATFLYSFEDSGVG-DVTGFLALDNTNK-----LIVLSFRGSRS----IENW-----------------IGNLNF-------DLK--EINDICSGCRGHDGFTSSWRSVADTLRQKVEDAVREHPDYRVVFTGHSLGGALATVAGADLRGNGYDIDVFSYGAPRVGNRAFAEFL---TVQTGGTLYRITHTNDIVPRLPPREFG	ISLLTLFCETDDGSPRVSLGFGDVDNADQVTTL-T---HGISTDVTQIGEWSDSAIALQKATSAELSEVGSTATTAVVLFMEWDSGGPSNVWE--------LERPHAGAERLAQLLRGFDRSNPNVQLDLGLHSLGTTMGAEMVANNPGLVQ--NAWLYGSAGI-AQETAADLENLIRRNELNLFATHAKDDFIAPMGRFDVS	-14.862,-27.256,5.269,-12.685,-26.426,2.243,-14.422,-29.214,0.398,-17.585,-27.431,0.830,-16.011,-24.114,-0.166,-13.586,-24.879,-2.851,-13.603,-21.383,-4.043,-11.685,-20.386,-1.074,-9.021,-23.009,-1.643,-7.345,-21.490,-4.424,-7.782,-18.041,-4.752,-5.722,-16.032,-2.732,-7.526,-12.865,-2.984,-10.135,-12.901,-5.466,-12.955,-13.788,-3.388,-15.708,-11.307,-3.556,-15.297,-9.035,-0.504,-19.007,-9.377,0.5…	WLGAHPDFAGTVGFVDVDRARALWDQLGRASTRGDDGAWATGPLAVLLGGAPTVIGNLNGIPAAAKDEFNRAELERLLDGELTDDQRRKLESVQDLLEDAEADSAPIISLLTLFCETDDGSPRVSLGFGDVDNADQVTTLTHGISTDVTQIGEWSDSAIALQKATSAELSEVGSTATTAVVLFMEWDSGGPSNVWELERPHAGAERLAQLLRGFDRSNPNVQLDLGLHSLGTTMGAEMVANNPGLVQNAWLYGSAGIAQETAADLENLIRRNELNLFATHAKDDFIAPMGRFDVSTHTVDPRNIAGTETFGSDGGWVLGYGDGDRDWGEKVEGHNSQASTEWFYLLDGFKTQQTGGMSPSFIPQWDDEAVGYLDPRSQSFKQTVVDLVDSIVLSEGARS
1DT3	MGYP000862246935	244	148	12	1	228	6	223	1	3.204e-09	275	269	240	EVSQDLFNQFNLF-AQYSAAAYCGK--NNDAPAGTNITCTGNACPEVEKADATFLYSFEDSGVGDVTGF-LALDNTNKLIVLSFRGSRSIENWIGNLNFDLKEINDICSGCRGHDGFTSSWRSVADTLRQKVEDAVREHPDYRVVFTGHSLGGALATVAGADLRGN-GYDIDVFSYGAPRVGNRAFAE--FLTVQTGGTLYRITHTNDIVPRLPPR----EF-----GYSHSSPEYWIKSGTLV	EIDKTL--AVFLAKVCMQTYNQYANDGNFDIPDG-----------------YNLVEGFK-ATVLNRTEWFGFIIRSGDTIVVAFRGTQSETDWLANANAYQTSYAFAPGRGKVHHGFMDIYESCREQILHTL---LSFSANSNIYITGHSLGAALAVINALDIAANTFFKPVMYNFAGPRVGNPIFAFKYNRLVT---NSVRIVNQHDLVPQLPPVIILTPLPSKLLYYQHVKRDYKISFQMNS	13.747,2.104,26.325,12.490,1.843,22.908,9.721,-0.465,23.101,10.433,-2.871,20.523,7.343,-2.745,18.841,6.621,-6.289,18.847,4.615,-6.896,15.693,1.440,-9.083,15.914,2.840,-11.922,13.795,-0.530,-13.643,13.479,-2.057,-10.427,12.072,0.982,-9.828,9.809,0.658,-13.366,8.335,-3.141,-12.894,7.882,-2.764,-9.531,6.112,0.008,-10.896,3.854,-2.442,-13.714,2.829,-5.128,-11.089,2.201,-2.626,-9.224,-0.055,-2.104,-12…	METTNEIDKTLAVFLAKVCMQTYNQYANDGNFDIPDGYNLVEGFKATVLNRTEWFGFIIRSGDTIVVAFRGTQSETDWLANANAYQTSYAFAPGRGKVHHGFMDIYESCREQILHTLLSFSANSNIYITGHSLGAALAVINALDIAANTFFKPVMYNFAGPRVGNPIFAFKYNRLVTNSVRIVNQHDLVPQLPPVIILTPLPSKLLYYQHVKRDYKISFQMNSIKGNHNLDNYLEALAIL
1DT3	MGYP000868842787	254	148	12	1	225	61	288	1	1.777e-10	291	269	309	EVSQ-----DLFNQFNLFAQYSAAAYCGKNNDAPAGTNITCTGNA-CPEVEKADATFLYSFEDSGVGDVTGFLALDNTNKLIVLSFRGSRSIENWIGNLNFDL----------KEINDI---CSGCRGHDGFTSSWRSVADTLRQKVEDAVREHPDYRVVFTGHSLGGALATVAGADLRGNGYDIDVFSYGAPRVGNRAFAEFLTVQTGGTLYRITHTNDIVPRLPP---REF-------GYSHSSPEYWIKSG	RTSTNFDTNSVLIALDLITRVEKDIHETPYG-LVDKGEISNRLNDKN--------VF-------------GVVWEG--SDSIWVTFRGTWNLYEWINNFKLAQVSYDDVIDKYKTVPEFMKKNKSIMVHKGFVKLYSEICNSLLNIIKTISINNK-RTIYVVGHSLGGAIATMMGLDLKNDGYDVVVYSFSGPRIGNCSFVNEVT-NSYLDVYRVHNSTDVIPNTPMTVSPNFLVHNKPYFYGHCGTEYKFTVN	24.232,25.878,-28.525,22.024,25.362,-31.398,21.604,21.592,-30.965,20.594,21.985,-27.396,17.856,24.414,-28.272,16.460,22.099,-30.952,16.302,19.282,-28.525,14.444,21.386,-26.010,11.883,22.457,-28.577,11.299,18.856,-29.698,10.697,17.919,-26.166,8.210,20.690,-25.507,6.399,19.886,-28.772,6.111,16.226,-27.951,4.807,17.067,-24.593,2.208,19.467,-25.895,1.095,17.010,-28.520,0.655,14.411,-25.930,-1.339,16.…	MIIARIITYIFIFVFTLIGLLSVISFSTTTDPIKYTLYNDIKCKDLKTCDNPIDNSLCLSRTSTNFDTNSVLIALDLITRVEKDIHETPYGLVDKGEISNRLNDKNVFGVVWEGSDSIWVTFRGTWNLYEWINNFKLAQVSYDDVIDKYKTVPEFMKKNKSIMVHKGFVKLYSEICNSLLNIIKTISINNKRTIYVVGHSLGGAIATMMGLDLKNDGYDVVVYSFSGPRIGNCSFVNEVTNSYLDVYRVHNSTDVIPNTPMTVSPNFLVHNKPYFYGHCGTEYKFTVNWKSIFNNHSIAAIVNNIDSVR
1DT3	MGYP000871323526	232	126	16	43	245	84	290	1	1.102e-08	234	269	323	EVEKADATFLYSFEDSGVGDVTG---FLALDNTNKLIVLSFRGS--RSIENWIGNLNFDL-----KEINDI-------CSGCRGHDGFTSSW-RSVADTLRQKVEDAVREHPDYRVVFTGHSLGGALATVAG---ADLR-----GN---GYDIDVFSYGAPRVGNRAFAEFLTVQTGGTLYRITHTNDIVPRLPPREFGYSHSSPEYWIKSGTLVPVTRNDIVKIEGIDATG	NLDAR---F-FA--------VRGRYALVLGTIFSDVVILTIRGTVFRELWDWKANIDAEKYHVRVGPHFHPFHYGHVEFDDQFFHRGFFESIIPQFA-SISDHINQRNSLGNDLKVVWTGHSLGGAMAAVGYAIHAKLNTTIRLAENIPGHAVCAYTFGMPRYCGLGS----VCSFPGP-HHIYRKEDLVPTVPLRKMGFSDSSKEYEI-IDN------GSIVLTERTDTFG	2.540,-22.137,8.978,4.807,-21.218,11.793,2.811,-20.990,15.009,4.541,-17.586,15.415,3.036,-16.247,12.123,-0.471,-17.393,13.207,-0.031,-15.670,16.581,1.183,-12.536,14.813,-1.829,-12.575,12.395,-4.236,-13.068,15.266,-2.604,-10.061,17.038,-2.924,-7.912,13.876,-6.554,-9.109,13.600,-7.280,-8.170,17.181,-5.754,-4.697,16.628,-7.630,-4.139,13.320,-11.041,-5.022,14.941,-10.435,-2.199,17.507,-10.093,0.491,1…	MDAKLIDRLNGILSLANQQNWEDESFSLNKAQVCVELSSIVYEDVQEYELKKASRIHLFASDTYRGLITNRTTNSILDGLSEANLDARFFAVRGRYALVLGTIFSDVVILTIRGTVFRELWDWKANIDAEKYHVRVGPHFHPFHYGHVEFDDQFFHRGFFESIIPQFASISDHINQRNSLGNDLKVVWTGHSLGGAMAAVGYAIHAKLNTTIRLAENIPGHAVCAYTFGMPRYCGLGSVCSFPGPHHIYRKEDLVPTVPLRKMGFSDSSKEYEIIDNGSIVLTERTDTFGLAGHVPKLLSSIKAHSIEGYAGLLSKATGIARP
1DT3	MGYP000881685763	179	113	5	58	232	18	183	1	5.886e-11	331	269	196	SGVGDVTGFLALDNTNKLIVLSFRGSRSIENWIGNLNFDLKEINDICSGCRGHDGFTSSWRSVADTLRQKVEDAVREHPDYRVVFTGHSLGGALATVAGADLRGNGYDIDVFSYGAPRVG----NRAFAEFLTVQTGGTLYRITHTNDIVPRLPPREFGYSHSSPEYWIKSGTLVPVTR	NGAIDTQYRLTV--TGDVAEIVFMGSVSWVDWISNFMFWKVPYKDMPVKWRAHAGFLDSWKAVKDE----IINGLHGCR--CVKVYGYSRGAAIAVLAHEWFAFNGYAVETRVFGCPRAIACKPDSAMLERFK-----TLHVYNNKGDIVTMLPPKLFGYKDVGNIVRLGTGFRIPCAK	11.242,9.591,13.976,13.208,6.674,15.418,10.015,4.681,15.778,9.326,5.187,12.063,12.758,3.969,11.012,12.287,0.843,13.214,8.829,0.333,11.766,10.131,0.727,8.204,12.972,-1.775,8.869,10.426,-4.243,10.204,8.315,-3.806,7.019,11.235,-4.397,4.619,12.810,-7.099,6.782,11.170,-10.448,7.744,9.791,-13.702,6.923,6.854,-13.619,4.606,3.872,-15.683,3.797,3.603,-16.195,0.113,0.131,-15.553,-0.811,-1.478,-15.934,-4.28…	MEKLVDLFRRIVSGSWVNGAIDTQYRLTVTGDVAEIVFMGSVSWVDWISNFMFWKVPYKDMPVKWRAHAGFLDSWKAVKDEIINGLHGCRCVKVYGYSRGAAIAVLAHEWFAFNGYAVETRVFGCPRAIACKPDSAMLERFKTLHVYNNKGDIVTMLPPKLFGYKDVGNIVRLGTGFRIPCAKWHLIPQYETELSK
1DT3	MGYP000887388247	261	152	18	15	238	59	290	1	0.0007693	117	269	383	QYSAAAYCG--KNNDAPAGTN-------ITCT----GNACPEVEKAD-------ATFLYSFE-DSGVG--DVTGFLALDNTNKLIVLSFR-GSRSIENWIGNLNFDLKEINDICSGCRGHDGFTSSWRSVADTLRQKVEDAVREHPDYRVVFTGHSLGGALATVAGADLRGNGYDI-DVFSYGAPRVGNRAFA---EFLTVQTGGTLYRITHTNDIVPRLPPREFGYSHSSPEYWIKSGTLVP---------VTRNDIVKI	VLSQLSYLYYEKVELPCKISDLTNYFYDLLGTDRDDLNNLNLLEKVCSSKRFSNIIVNYYISKDNLVENKQFSAVTFFLETG-DIYIAYRGTDGTVNGWKEDFNM------SFLSP---VPAQ---------VEALKYLETVLSLTNNYCYIGGHSKGGNLAFYAAIYLKDKR-RIKKVFSHDGPGF-QEKVVTSKEFKNTEPL--LYKTVPESSIIGMLLCN------SEDYTVVKSNESGILQHDPFSWLVNDNSFIYL	25.433,-66.537,13.125,22.737,-65.792,15.569,24.723,-64.162,18.378,23.514,-61.676,21.261,21.159,-58.822,20.861,19.416,-58.627,24.020,20.883,-55.988,25.943,20.566,-52.876,24.326,16.954,-52.147,24.604,16.325,-50.916,28.038,18.043,-47.677,27.794,16.564,-46.883,24.666,13.053,-46.752,26.032,13.683,-43.963,28.365,14.943,-41.947,25.642,12.015,-42.704,23.485,9.580,-41.226,25.959,11.418,-38.016,26.084,11.6…	LQIYYTSFFKKSYLNIRVGIKIYTYFFLIIYYIMNIIDYVSKNNLTMKDSPLNEVDSLVLSQLSYLYYEKVELPCKISDLTNYFYDLLGTDRDDLNNLNLLEKVCSSKRFSNIIVNYYISKDNLVENKQFSAVTFFLETGDIYIAYRGTDGTVNGWKEDFNMSFLSPVPAQVEALKYLETVLSLTNNYCYIGGHSKGGNLAFYAAIYLKDKRRIKKVFSHDGPGFQEKVVTSKEFKNTEPLLYKTVPESSIIGMLLCNSEDYTVVKSNESGILQHDPFSWLVNDNSFIYLKRLTKTSIYTNKVLKDTINNLTKKEKEEFVKALFTIFDRADIKTLKDLSKNWYKKIPPIIKSMESLDDKIKKCLWDTIKVLVVFIIKNLPFLL
1DT3	MGYP000890023519	271	153	13	1	211	293	552	1	1.667e-08	236	269	682	EVSQDLF--NQFNLFAQYSAAAYC-----------------------------GKNNDAPA-GTNITCTG---------NACPEVEKAD------ATFLYSFEDSGVGDVTGFLALDNTNKLIVLSFRGSRSIENWIGNLNFDLKEINDI-------CSGCRGHDGFTSSWRSVADTLRQKVEDAVR----EHPDYRVVFTGHSLGGALATVAGADLRGNGYDIDVFSYGAPRVGNRAFAEFLTVQTGGTLYRITHT--NDIVPRLPPREF	RGDADVFILEEFKYYYRYAFGVYGSSMYLYLKPCSLRACDVWCCSDALCCFAKGNRDYAPATCLEKTCPNCANCFGVQYATARRMTHAHKEDILYISFKNS-VLYS--PFGVF--VDREKRDIVVVIRGTYSLDDCIKDCMVEAMPMDEVGKKFGFDGTNEFCHKGVYSTAMTIVDVLLRKQLLPSHHEGDELGSYGLKIVGHSLGGAVAAVVALLMRNEVPTVRALLFSALPIFSPGLVQQTKD----FV--FMETVGLDLPPRLSPQNV	16.306,-5.885,-21.672,19.702,-6.197,-22.847,21.083,-5.879,-19.591,24.335,-4.348,-19.801,26.491,-6.626,-17.949,29.128,-4.739,-16.364,31.449,-6.214,-14.044,29.265,-9.101,-13.775,26.481,-6.972,-13.065,23.355,-6.683,-15.019,22.635,-3.188,-15.448,19.116,-2.803,-16.052,18.892,0.596,-17.088,15.589,1.614,-17.693,15.385,3.487,-20.802,14.040,6.278,-18.896,16.899,6.577,-16.808,18.550,7.193,-19.948,16.346,10…	MPATKWCGQTLRVSADCCFFRGCLDVLCILPLVCVGIIVALGRHYLGDIGGCGWGDTFYVAPLLGLAGVWLLVALILMISSGRGSPSQDRPTCIPFLLSLRLGLLIAFVGNNIMGGVWFLSEGVQEACSAFFRGDQIQHVLVFQTVLSSVAILQFFGLWCCCCSRKYPPMEPRNEALLQRTLELHVYKFMRTWCWPLVDNTGVDEHYESISRSFQELFNDVDFTFDDILLGLYLLDGRQQTLEKRRWEQHRQGNADEGMLTGDVERGLAAASTPELATIDRAPFLQDKTIPFRGDADVFILEEFKYYYRYAFGVYGSSMYLYLKPCSLRACDVWCCSDALCCFAKGNRDYAPATCLEKTCPNCANCFGVQYATARRMTHAHKEDILYISFKNSVLYSPF…
1DT3	MGYP000892111259	235	131	13	1	220	55	257	1	1.435e-09	298	269	357	EVSQDLFNQFNLFAQYSAAAYCGKNNDAPAGTNITCTGNACPEVEKAD-----ATFLYSFEDSGVGDVTGFLALDNTNKLIVLSFRGSRSIENW--IGNLNFDLKEINDICSGCRG-HDGFTSSWRSVADTLRQKVEDAVREHPDYRVVFTGHSLGGALATVAGADLRGNGY---DIDVFSYGAPRVGNRAFAEF----LTVQTGGTLYRITHTNDIVPRLPPREFGYSHSSPEY	ESPEHLLATGLTFAALSNAAY----EDD-------------PIARRLDAEDAHFDVLHFEE-RPGTDAQAFVVRD--NRAIVVAIRGTEMDSPLDVLLDASVV-TSN----GIFKGAHAGFASAVYSLAPSVTDVIRDAKARDPRLQVWLTGHSLGGAMAQIYAMHLRDVGIRVDGVV--TFGAPAPGKSDFSVFYGGLAE-----RTHRFENEEDIVPCMPPDQVAWIQNGHTH	-8.097,-7.079,-41.902,-5.001,-9.040,-41.209,-2.684,-7.740,-38.700,0.609,-8.197,-40.243,3.318,-9.585,-38.185,6.316,-7.832,-39.076,8.796,-10.676,-38.845,11.843,-8.847,-38.816,12.817,-7.950,-35.540,16.337,-6.981,-35.195,17.876,-8.759,-32.422,19.779,-6.047,-30.925,22.049,-7.956,-28.816,23.213,-5.238,-26.734,26.053,-6.747,-25.086,25.894,-5.190,-21.754,29.226,-5.573,-20.412,28.529,-5.888,-16.892,31.287…	MPYGRDPDGMNVQMRFSILWVAVPLVLFGASASAQVIPWTAHTRGRMIDVYDPGESPEHLLATGLTFAALSNAAYEDDPIARRLDAEDAHFDVLHFEERPGTDAQAFVVRDNRAIVVAIRGTEMDSPLDVLLDASVVTSNGIFKGAHAGFASAVYSLAPSVTDVIRDAKARDPRLQVWLTGHSLGGAMAQIYAMHLRDVGIRVDGVVTFGAPAPGKSDFSVFYGGLAERTHRFENEEDIVPCMPPDQVAWIQNGHTHVVYADRVDDYAPGGSECDSVPAAAMGALFCDAPPKWRRFLGVVLVPGSTVTCEIPDPLRAFGDVLLDVVGGRGGALHGIESYLGRISARIPRRVEALIGS
1DT3	MGYP000894788590	204	112	9	19	217	5	184	1	1.606e-12	390	269	184	AAYCGKNNDAPAGTNITCTGNACPEVEKADATFLYSFEDSGVGDVTGFLALDNTNKLIVLSFRGSRSIENWIGNLNFDLKEINDICSGCRGHDGFTSSWRSVADTLRQKVEDAVREHPDYRVVFTGHSLGGALATVAGADLR---GNGYDIDVFSYGAPRVGNRAFAEFLTVQTGGTLYRITHTNDIVPRLPPREF--GYSHSS	YAACSISKKYIV---LIC-------------KV-STF--TDKRGVQGFTAYNPDRNEIAVTFRGTATLKVLIADLVIDLVDY-PLCRGCMVHRGFLTLYNSIAGTVHQHVHELMVKHPSASIRATGHSFGAAMAILATLDLQYVFGTVLPPY--TFGQPRVGNLAFAKYLNKK--TPAYRVVHYADLIPTLPPRVFNIGYMHGG	-13.180,14.303,7.371,-16.755,13.269,7.738,-17.644,9.901,9.068,-20.299,8.855,6.822,-22.272,6.142,8.201,-23.470,4.304,5.433,-25.854,1.937,6.880,-24.714,-1.293,5.909,-27.153,-2.311,3.538,-27.118,-5.936,2.673,-26.894,-6.863,-0.757,-27.537,-10.477,-1.336,-24.981,-11.615,-3.407,-21.711,-10.171,-3.147,-21.547,-7.317,-1.178,-19.345,-7.163,1.486,-20.909,-5.521,4.352,-18.905,-2.532,5.002,-20.201,-1.228,8.1…	GGVHYAACSISKKYIVLICKVSTFTDKRGVQGFTAYNPDRNEIAVTFRGTATLKVLIADLVIDLVDYPLCRGCMVHRGFLTLYNSIAGTVHQHVHELMVKHPSASIRATGHSFGAAMAILATLDLQYVFGTVLPPYTFGQPRVGNLAFAKYLNKKTPAYRVVHYADLIPTLPPRVFNIGYMHGG
1DT3	MGYP000898971227	154	117	5	75	220	12	159	1	9.106e-05	166	269	200	LIVLSFRGSRS------IENWIGNLNFDLKEINDICSGCRGHDGFTSSWRSVADTLRQKVEDAVREHPDYRVVFTGHSLGGALATVAGADLRGN--GYDIDVFSYGAPRVGNRAFAEFLTVQTGGTLYRITHTNDIVPRLPPREFGYSHSSPEY	YIIFNGTELHQPNCLDVCKDVFSYTKILFEYL---DHDVGVHKGYYDNL--FKNNSYGHITEFIDSGSYDTIYITGHSAGACLSVIATYLLANKYPHINFKTTLYGTIKQGNYQFKKYFDKLPNVDIISFVNNKDIVPILP-VYYKYYGVTDHI	7.683,-11.342,-0.315,7.639,-11.347,3.415,5.081,-10.086,5.814,5.116,-9.813,9.606,2.322,-9.788,12.185,3.145,-8.017,15.447,0.696,-8.766,18.404,1.290,-5.994,20.785,-1.208,-3.634,22.436,-1.861,-2.680,18.812,-1.833,-5.275,16.035,0.400,-4.496,13.055,0.598,-6.172,9.662,3.851,-5.231,7.952,4.506,-6.019,4.237,8.123,-5.869,3.173,9.128,-4.383,-0.206,11.818,-5.678,-2.421,15.258,-5.396,-0.972,16.970,-2.854,-3.1…	MEYMIYEGNKPYIIFNGTELHQPNCLDVCKDVFSYTKILFEYLDHDVGVHKGYYDNLFKNNSYGHITEFIDSGSYDTIYITGHSAGACLSVIATYLLANKYPHINFKTTLYGTIKQGNYQFKKYFDKLPNVDIISFVNNKDIVPILPVYYKYYGVTDHIHLCNDGKCESMKNAYLFKNHSIVDHDKLNYLKNLFKIFIDV
1DT3	MGYP000899169392	146	94	3	77	222	2	138	1	8.219e-08	278	269	216	VLSFRGSRSIENWIGNLNFDLKEINDICSGCRGHDGFTSSWRSVADTLRQKVEDAVREHPDYRVVFTGHSLGGALATVAGADLRGNGYDIDVFSYGAPRVGNRAFAEFLTVQTGGTLYRITHTNDIVPRLPPREFGYSHSSPEYWI	LVSFRGTKELGDWLSNLNLIREHV----AYGKVHGGFLGAFTAARKTLQELLVEAAAS--DKSVWVTGHSLGGALATMMAGEMKGIQSLAGIYTFGQPRAVNNEARRFLNEAYDSRMFRFVNDDDIVPKVPP---LLKHVGELFWF	-3.098,-8.187,16.333,-0.476,-6.278,14.462,0.586,-7.437,10.957,3.765,-5.688,9.755,5.054,-6.102,6.192,8.682,-5.342,5.560,10.074,-3.389,2.562,12.840,-4.493,0.211,16.472,-4.561,1.365,17.667,-3.359,-2.010,15.451,-0.574,-3.270,17.483,0.090,-6.401,17.078,-3.301,-7.915,13.502,-3.360,-6.976,12.631,0.006,-8.647,14.307,-1.189,-11.790,12.154,-4.276,-11.772,8.844,-2.530,-11.390,7.534,-4.229,-14.317,4.252,-3.0…	VLVSFRGTKELGDWLSNLNLIREHVAYGKVHGGFLGAFTAARKTLQELLVEAAASDKSVWVTGHSLGGALATMMAGEMKGIQSLAGIYTFGQPRAVNNEARRFLNEAYDSRMFRFVNDDDIVPKVPPLLKHVGELFWFDGKGELKKAPAGVRSDDFGPEGLDELEFETLQKVIEPSARQINRAHKDIIECPLDELVGGENTAVRGALPTRGIFPSI
1DT3	MGYP000899867424	238	154	13	13	237	25	237	1	7.076e-11	316	269	282	FAQYSAAAYCGKNNDAPAGTNITCTGNACPEV---EKADATFLYSFEDSGVGDVTGFLALDNTNKLIVLSFRGSRSI--ENWIGNLNFDLKEINDICSGCRGHDGFTSSWRSVADTLRQKVEDAVREHPD--YRVVFTGHSLGGALATVAGA------DLRGNGYDIDVFSYGAPRVGNRAFAEFLTVQTGGTLYRITHTNDIVPRLPPREFGYSHSSPEYWIKSGTLVPVTRNDIVK	MMKLSYSVYAGTTDNVG--TRED--WSITERLVRNAGYDMHK--IEATQGIYEPNAMVCWD--EENVFLIFRGTEPTAWNQWATDALTQKALF-CIG---KAHKGFFSAVEVIWPEIVSRLQQID---PDKRKLLFVGGHSLGAGMSQVASAKLAFTEENRPPAA---VYNFGCPRALNIEGARIYNELLGLNTFRVVNNNDIVCNLPLKTMGFSHVGQLKYLTS-------DGEVLE	13.773,0.391,16.988,11.743,2.518,19.230,10.500,4.507,16.313,8.722,1.531,15.126,6.556,0.673,18.068,3.031,0.112,16.678,0.472,1.894,18.978,-3.123,0.809,18.275,-4.539,3.859,20.240,-2.960,6.138,17.607,-5.026,4.681,14.790,-8.381,6.345,14.045,-10.973,4.212,12.258,-11.770,6.508,9.289,-11.856,6.558,5.526,-10.242,9.991,5.622,-6.504,10.830,5.373,-4.812,11.205,8.731,-1.093,11.465,9.334,-1.419,9.242,12.464,-3…	MKDYVINRNEFVATSKWKISNALHMMKLSYSVYAGTTDNVGTREDWSITERLVRNAGYDMHKIEATQGIYEPNAMVCWDEENVFLIFRGTEPTAWNQWATDALTQKALFCIGKAHKGFFSAVEVIWPEIVSRLQQIDPDKRKLLFVGGHSLGAGMSQVASAKLAFTEENRPPAAVYNFGCPRALNIEGARIYNELLGLNTFRVVNNNDIVCNLPLKTMGFSHVGQLKYLTSDGEVLEEPSHARIAREALLGGIGALANLNPVDFVTDHLPHHYAKRLSAIRD
1DT3	MGYP000900563079	137	89	4	76	206	1	125	1	4.993e-06	207	269	206	IVLSFRGSRSIENWIGNLNFDLKEINDICSGCRGHDGFTSSWRSVADTLRQKVEDAVREHPDYRVVFTGHSLGGALATVAGADLR--GNGYDIDVFSYGAPRVGNRAFAEFLTVQT----GGTLYRITHTNDIVPRL	IVIAIRGTMNLHDILIDTSGQNKSF----YEGLAHLGMSRSAKLLFEDLNKNIVEAKKSNPDYTIVVTGHSLGAGVSILLGFILAKENPNWSVQTWAFAPPPVV--------TTDVIIPINLLINNFIYGDDIIPRL	-8.376,-14.312,11.645,-5.739,-14.135,8.945,-6.165,-12.449,5.541,-3.249,-12.952,3.183,-3.116,-10.730,0.100,-0.940,-11.676,-2.788,1.344,-9.098,-4.557,1.396,-8.507,-8.266,2.774,-11.289,-10.402,3.441,-9.263,-13.416,5.720,-6.281,-13.449,3.724,-4.783,-16.174,0.750,-4.641,-13.926,2.796,-3.017,-11.253,3.565,-0.208,-13.525,0.053,0.266,-14.495,-1.072,-0.024,-11.028,1.522,2.305,-9.746,0.909,4.823,-12.236,-2…	IVIAIRGTMNLHDILIDTSGQNKSFYEGLAHLGMSRSAKLLFEDLNKNIVEAKKSNPDYTIVVTGHSLGAGVSILLGFILAKENPNWSVQTWAFAPPPVVTTDVIIPINLLINNFIYGDDIIPRLSLASLQRLKYMAIQLKEHHQNNFQRCYHILNAGNNFGETGKKFFDKLGINVGHAPDINSLDTRYHDDHPLILVGNIYYIHR
1DT3	MGYP000903966343	221	133	9	52	258	23	221	1	3.945e-10	312	269	233	LYSFEDSGVGDVTGFLALDNTNKLIVLSFRGSRSIENWIGNLNFDLKEINDICSGCRGHDGFTSSWRSVADTLRQKVEDAVREHPDYRVVFTGHSLGGALATVAGADLRGNG----YDIDVFSYGAPRVGNRAFAEFLTVQTGGTLYRITHTNDIVPRLPPREFGYSHSSPEYWI-KSGTLVPVTRNDIVKIEGIDATGGN---------NQPNIPDIPAH	LSPTINERSTDTQVLIQW--TGNRALVVFPGTASFRDGLTDVRAAKAT---WNTDKRAHAGFVAAFRSVDEQLR---ERLIEQRTPDELIVTGHSLGGALATLAAHAWSGTFILHPNA--VYTFGSPRVGNGPFQRSYDAALHDATFRVVNEGDPVSRVPWMLGTYRHVGTRVFLPKSG--------PL----EIDAPFWRGMLPEATELNGHRFISVAPH	-11.120,-11.322,-7.489,-10.944,-9.249,-10.694,-9.186,-5.841,-10.745,-11.915,-3.188,-10.192,-10.716,0.055,-11.909,-13.508,2.162,-10.217,-12.436,0.973,-6.747,-8.793,1.683,-7.691,-9.809,5.255,-8.645,-11.706,5.647,-5.344,-8.672,4.431,-3.345,-6.361,6.799,-5.273,-8.791,9.760,-4.820,-8.983,9.092,-1.042,-5.152,8.921,-0.807,-4.929,12.166,-2.876,-7.552,13.912,-0.614,-5.464,12.906,2.485,-2.277,14.385,0.874,…	MRFDKQLAIECAETINALYRGELSPTINERSTDTQVLIQWTGNRALVVFPGTASFRDGLTDVRAAKATWNTDKRAHAGFVAAFRSVDEQLRERLIEQRTPDELIVTGHSLGGALATLAAHAWSGTFILHPNAVYTFGSPRVGNGPFQRSYDAALHDATFRVVNEGDPVSRVPWMLGTYRHVGTRVFLPKSGPLEIDAPFWRGMLPEATELNGHRFISVAPHHITEYLRRLKTA
1DT3	MGYP000905507430	239	147	8	14	248	2	218	1	7.824e-18	579	269	245	AQYSAAAYCGKNNDAPAGTNITCTGNACPEVEKADATFLYSFEDSGVGDVTGFLALDNTNKLIVLSFRGSRSIENWIGNLNFDLKEINDICSGCRGHDGFTSSWRSVADTLRQKVEDAVREHPDYRVVFTGHSLGGALATVAGADLR----GNGYDIDVFSYGAPRVGNRAFAEFLTVQTGGTLYRITHTNDIVPRLPPREFGYSHSSPEYWIKSGTLVPVTRNDIVKIEGIDATGGNN	GYLSGAAYE---------TSTSIEAWSCSYCHHYNVTDVKVFS-NAIGGIQGFTAFSHSLNAVLVVFRGSSNIQNWILNIGTTRSSYS-LCSGCSVHTGFSGGYNLVASAVKTAVQNLKAKYRGSKLFVTGHSLGGALAILCTADLKSVFGTVDL---TYTFGQPRVGNQAFADWYEATHP-TTFRLVDYADIVTHLPPSNLGFVHNNNQIWYQRGMQS------YQICS-PESPSCAN	-10.849,0.796,-0.179,-10.068,4.546,-0.651,-12.098,5.567,2.478,-10.142,2.934,4.516,-6.883,4.422,3.202,-8.210,7.827,4.303,-9.112,6.610,7.760,-5.417,5.631,8.185,-4.438,9.391,8.116,-6.621,10.123,11.179,-5.312,10.164,14.804,-4.788,6.784,16.508,-7.547,7.739,19.018,-10.107,8.581,16.268,-9.224,5.306,14.387,-9.484,3.138,17.565,-12.814,4.790,18.399,-13.828,4.474,14.671,-15.055,8.068,14.969,-13.140,9.834,12…	MGYLSGAAYETSTSIEAWSCSYCHHYNVTDVKVFSNAIGGIQGFTAFSHSLNAVLVVFRGSSNIQNWILNIGTTRSSYSLCSGCSVHTGFSGGYNLVASAVKTAVQNLKAKYRGSKLFVTGHSLGGALAILCTADLKSVFGTVDLTYTFGQPRVGNQAFADWYEATHPTTFRLVDYADIVTHLPPSNLGFVHNNNQIWYQRGMQSYQICSPESPSCANSIGTTNYSTDDHNLDNYIKLKTFTESN
1DT3	MGYP000906267670	267	147	11	5	211	351	608	1	1.474e-08	254	269	751	DLFNQFNLFAQYSAAAYC-----------------------------GKNNDAPAGTNITCTGN----------ACPEVEKA----DATFLYSFEDSGVGDVTGFLALDNTNKLIVLSFRGSRSIENWIGNLNFDLKEINDICS-------GCRGHDGFTSSWRSVADTLRQ-KV-----EDAVRE-HPDYRVVFTGHSLGGALATVAG---ADLRGNGYDIDVFSYGAPRVGNRAFAEFLTVQTGGTLYRITHTNDIVPRLPPREF	KMFLDLYYYYKYALGIYGDLLYIYSNLKSCRVCNILCCSNALHCCAPGSKFQTPRSCCSRACTNCVYRYGAQYAAMLKTINVPNEND--ILYVTFKNTLVHSPFFVLLDHEKKTIVYSIRGTLSLDDCVKDVVAEEMILDEVGKEWGFDGVGEYCHQGMFDTTMTMINTLKKRKLLPCIDNNAIPEVAKHYDVVFTGHSLGAGVATLASLLLKNLIPN---LRGIVYSPVPNLSPGLIARTRA----YITGITSGIDLVARLNPVNV	8.045,22.258,-11.210,8.552,22.521,-14.710,7.772,19.408,-16.318,9.763,19.336,-19.232,7.784,21.082,-21.688,8.607,19.911,-25.071,6.681,20.773,-28.033,4.208,22.300,-25.843,3.851,19.252,-23.960,4.446,18.536,-20.296,6.444,15.620,-19.597,5.861,13.423,-16.634,9.363,13.244,-15.684,11.420,15.637,-13.773,14.369,17.301,-15.275,16.390,15.679,-12.566,15.445,12.166,-13.778,17.429,12.873,-16.878,20.630,11.990,-1…	MPLTTWCGRRYGFGTDACVFQGCVDIIYGVVLLTLGVAAISIEGNVNSLSSCGNYGLIYVVSLLVLCVFWCVIAAFLTLCSKVGSPMQTELRSQVPILLSTRALLAVIFVANNIMGLAWWGSEDDGNSCKDFGHLSVSLLELTILVQTLCTAYIVYFYGIICCCCRRKILPKAFGGSSAERNTGEVRLSITDDYDHYMADVCGKKCRGFCNMFVDSGGAMSAYDVVGRLLALFYEGDATALTGDDIAMGLWLVQREQRVREKALISTMISDDGTAEPSVGAFKDAWGSGQTPLLLANQSTVAEVPLAPGLSAIARKVSKLEKSAKTTMHYQTSSTKFKHALFSNSNADDVKMFLDLYYYYKYALGIYGDLLYIYSNLKSCRVCNILCCSNALHCCAPGS…
1DT3	MGYP000906970821	242	138	13	8	234	4	219	1	1.529e-13	391	269	258	NQFNLFAQYSAAAYCGKNNDAPAGTNITCTGNACPEVEK----ADATFLYSFEDSGVGDVTGFLALDNTNKLIVLSFRG-SRSIENWIGNLNFDLKEINDICSGCRGHDGFTSSWRSVADTLRQKVEDAVREH--PDY-RVVFTGHSLGGALATVAGADLRGN-GYDIDVFSYGAPRVGNRAFAEFLTVQTGGTLYRITHTNDIVPRLPP-REFGYSHSSPEYWIKSGTL-----VPVTRND	EQALLCARLSRDVY------LP-------MHTFHKQLQEQYPGCPIQIFQ------VGGCQLACLSIPSNKTTFLIFRGTDFSTNDFMANLDVVRIQDTFL-GNVYVHSGFLEELQDIWKN----VHNFVHVHAKPDYHTLVVTGHSLGGALALLCASRLAVCFVSKVDCYSFGAPMVGGDTFSTFFDKLPNLDHYRFENQNDIVPKLKTLHFFGYEHVGQKYYF--NYLGEILSRPLTWKE	8.080,-7.917,10.582,6.182,-11.196,10.040,7.235,-12.529,6.564,4.163,-14.830,6.340,1.904,-11.787,6.915,3.985,-9.825,4.337,3.479,-12.623,1.769,-0.284,-12.795,2.562,-0.515,-8.991,2.091,1.475,-9.175,-1.200,-0.828,-11.997,-2.499,-3.968,-9.997,-1.509,-2.396,-6.909,-3.241,-1.876,-9.015,-6.363,-5.326,-10.646,-6.358,-7.206,-7.305,-5.996,-6.191,-6.733,-9.715,-8.535,-9.665,-10.757,-12.055,-8.833,-12.067,-14.…	MDLEQALLCARLSRDVYLPMHTFHKQLQEQYPGCPIQIFQVGGCQLACLSIPSNKTTFLIFRGTDFSTNDFMANLDVVRIQDTFLGNVYVHSGFLEELQDIWKNVHNFVHVHAKPDYHTLVVTGHSLGGALALLCASRLAVCFVSKVDCYSFGAPMVGGDTFSTFFDKLPNLDHYRFENQNDIVPKLKTLHFFGYEHVGQKYYFNYLGEILSRPLTWKEQWKDWLYGQWQALRRMQLFDSLEDHRIDQYVQILEQNLS
1DT3	MGYP000908096129	210	131	11	1	197	84	273	1	2.912e-07	223	269	275	EVSQDLFNQFNLFAQYSAAAYCGKNNDAPAGTNITCTGNACPEVEKAD-ATFLYSFEDSGVGDVTGFLALDNTNKLIVLSFRGSRSIENWI------GNLNFDLKEINDICSGCRGHDGFTSSWRSVADTLRQKVEDAVREHPDYRVVFTGHSLGGALATVAG------ADLRGNGYDIDVFSYGAPRVGNRAFAEFLTVQTGGTLYRIT	KFSIPL---AKYFLKIAAFSYCS-------HENII-KKNCCSDLFTNDEWELFYEEK-VEYDDYQYAILINKKFKKIAITFPGTKYATQLVKELYYSNGVAFQ-KD-----ETEKTMEYLKFVYSKFEKTLEKTLNGLFEKFSDYQFIFTGHSLGGNMAAISILHSVKYGNLKKSS-EPLLITYGQPRTGNDVFANELMKYVKI-IYRIT	48.451,-3.039,16.195,46.865,-4.472,13.215,43.318,-3.575,13.600,43.715,0.167,13.304,45.438,-0.216,9.943,42.533,-1.975,8.452,39.955,0.625,9.270,41.935,3.403,7.654,42.311,1.557,4.317,38.629,1.106,4.076,37.848,4.697,4.790,40.226,5.836,1.982,38.646,3.581,-0.560,35.291,4.676,0.431,36.162,8.319,0.089,37.643,7.751,-3.365,34.552,6.085,-4.427,32.408,8.865,-3.260,34.570,11.399,-5.000,34.443,9.393,-8.127,30.…	MSYLRIKTKYLMIFSLMIISLLSFSSQNEEKDNNHFEADKINFDKFLEFSKFENKEISLKKFKEETKDLTLQKLLKDNEPNLSKFSIPLAKYFLKIAAFSYCSHENIIKKNCCSDLFTNDEWELFYEEKVEYDDYQYAILINKKFKKIAITFPGTKYATQLVKELYYSNGVAFQKDETEKTMEYLKFVYSKFEKTLEKTLNGLFEKFSDYQFIFTGHSLGGNMAAISILHSVKYGNLKKSSEPLLITYGQPRTGNDVFANELMKYVKIIYRITRR
1DT3	MGYP000911167073	203	107	10	63	217	4	206	1	4.32e-09	288	269	241	VTGFLA-LD------NTNK-LIVLSFRGSRSIENWIGNLNFDLKE-INDICSG--------CRGHDGFTSSWR-------SVADTLRQKVEDAVREHPDY--RVVFTGHSLGGALATVAGADL----------------RGNGYDIDVFSYGAPRVGNRAFAEFLTVQTGGTLYRITHTNDIVPRLP----PREF--GYSHSS	FAGYVAVCDNEREVRRMGRRDIVIVLRGTATCPEWAENLRTGLVPVSDDDDGDDATAAQNVPKVAKGFLSLYKTAGDHVPSLSDAIVEEVRRLIEVYKGEELSITVVGHSLGASLALLAADELSACLAADAASNSTAADDHQPPPVSVVSFGGPKTGNRAFADRLQHERGVNVLRVVNAGDVVTRVPGLVTPTTMAEGYVHAG	-9.408,15.187,-12.273,-7.678,12.797,-10.471,-9.500,9.840,-11.223,-8.102,7.786,-8.806,-8.602,4.339,-9.770,-8.481,1.985,-7.039,-11.044,-0.537,-5.994,-12.124,-2.258,-2.830,-13.225,-5.847,-3.207,-14.315,-8.584,-0.762,-14.123,-12.285,-1.310,-17.825,-13.407,-1.672,-17.080,-17.007,-2.428,-18.072,-18.925,0.728,-15.984,-21.927,-0.303,-12.810,-19.757,-0.421,-13.705,-17.918,2.791,-14.073,-21.324,4.561,-10.8…	RTSFAGYVAVCDNEREVRRMGRRDIVIVLRGTATCPEWAENLRTGLVPVSDDDDGDDATAAQNVPKVAKGFLSLYKTAGDHVPSLSDAIVEEVRRLIEVYKGEELSITVVGHSLGASLALLAADELSACLAADAASNSTAADDHQPPPVSVVSFGGPKTGNRAFADRLQHERGVNVLRVVNAGDVVTRVPGLVTPTTMAEGYVHAGGAELTLDSRDSPCLRPDAGPACCHDLEAYLHLLDG
1DT3	MGYP000918273417	172	122	6	61	227	10	176	1	1.102e-08	279	269	203	GDVTGFLALDNTNKLIVLSFRGSRSIENWIGNLNFDLKEINDIC-SGCRGHDGFTSSWRSVAD-TLRQKVEDAVR--EHPDYRVVFTGHSLGGALATVAG-ADLRGNGYDIDVFSYGAPRVGNRAFAEFLTVQTGGTLYRITHTNDIVPRLPPREFGYSHSSPEYWIKSGTL	THIHIFIIKNKKNKEIKIIFKGTTNIHNTFYNMQFQLKSIDFLDNSDIKIHNGF---YQNLFKGKIYQLIIKTLNNQNLKDYIIYVSGHSLGGSLSILFGFLSSYVYNNKFIIITFGSSKVGNNVFKKKFNKINNLLCYNYYNSYDYIFHLPL--IHYKHVGNIIKLKQKNG	-7.692,10.680,15.273,-5.778,7.869,16.947,-2.364,8.589,15.553,-0.596,11.454,13.596,3.050,10.492,13.316,6.092,11.463,11.181,8.894,8.945,11.294,12.125,10.986,12.022,14.326,8.381,10.134,12.295,7.817,7.034,10.142,11.024,6.861,7.109,8.718,6.297,3.931,10.431,7.552,1.021,8.211,8.817,-2.527,8.920,9.964,-4.775,6.522,11.863,-8.401,7.678,12.060,-11.174,5.717,13.884,-14.868,6.161,12.992,-16.783,4.551,15.921,-…	ILLNYICPKTHIHIFIIKNKKNKEIKIIFKGTTNIHNTFYNMQFQLKSIDFLDNSDIKIHNGFYQNLFKGKIYQLIIKTLNNQNLKDYIIYVSGHSLGGSLSILFGFLSSYVYNNKFIIITFGSSKVGNNVFKKKFNKINNLLCYNYYNSYDYIFHLPLIHYKHVGNIIKLKQKNGDSKINFLKNHCYNFYFKNFLFTYSNNI
1DT3	MGYP000919686693	170	101	9	1	159	39	187	1	9.106e-05	131	269	189	EVSQDL-------FNQFNLFAQYSAAAYCGKNNDAPAGTNITCTGNACPEVEKA-DATFLYSFEDSGVGDVTGFLALDNTNKLIVLSFRGSRSIENWIGNLNFDLKEINDICSGCRGHDGFTSSWRSVADTLRQKVEDAVREHP---DYRVVFTGHSLGGALATVAGADL	NVQPTLGSSDLPPFIERNL--HFSSASYCS-------ERKIH-SWECGIHCTKTPEI--KGSDIWTTNDGTTIMTFHDPIQNAQIISFRGTSDVENTISDLRFGLFSPYHERPHVKVHKGMYLEYL----KYRDEIVEEIVNLGLANDTTIISTGHSSGGAL-----AMF	-6.445,-0.163,-29.188,-9.250,2.046,-28.205,-8.429,4.158,-25.270,-11.593,5.628,-24.098,-11.077,8.957,-22.857,-12.853,9.142,-19.789,-14.015,12.615,-19.652,-13.636,13.658,-16.177,-16.257,16.103,-16.543,-18.154,14.544,-14.151,-16.136,14.345,-11.392,-17.664,17.443,-10.199,-19.662,15.865,-7.820,-17.823,13.610,-6.055,-18.637,14.689,-2.749,-15.434,14.688,-1.483,-16.169,12.194,0.966,-14.083,13.205,3.570,-…	SKFARISFNNISSYTIMKISISILIATCASILGISNAANVQPTLGSSDLPPFIERNLHFSSASYCSERKIHSWECGIHCTKTPEIKGSDIWTTNDGTTIMTFHDPIQNAQIISFRGTSDVENTISDLRFGLFSPYHERPHVKVHKGMYLEYLKYRDEIVEEIVNLGLANDTTIISTGHSSGGALAMFFG
1DT3	MGYP000927448353	257	165	12	7	239	11	251	1	3.75e-11	353	269	298	FNQFNLFAQYSAAAYCGK-----NNDAPAGT--------NITCTGN--ACPEVEK----ADATFLYSFEDSGVGDVTGFLALDNTNKLIVLSFRGSRSIENWIGNLNFDLKEINDICSGCRGHDGFTSSW--RSVADTLRQKVEDAVREHPDYRVVFTGHSLGGALATVAG--ADLRGNGYDIDVFSYGAPRVGNRAFAEFLTVQTGGTLYRITHTNDIVPRLPPREFGYSHSSPEYWIKSGTLVPVTRND-IVKIE	WELIDDMSKLMFLIYDYTDKWKLQNKSVNFLDTFITQNRNLVSDKDITLLSGLKEKYPKGEF---LNFY-SNSSDAQCFIGTNPRKKRLCIVFRGTDSFTDCLYDLFIIKKNL---GNGIKVHRGFYNQLHYDNLYQKVLTVVREQTQKHPDWSVCITGHSLGGALATLSGYLLAKELPQLQYTVYAFASPKVGNKKFKTEYNALENVYTCRICYNKDCVIAFPT--FWYEHVGYNLWYEK-------RTDTWHFYD	-12.795,17.520,9.395,-10.902,15.680,11.713,-7.997,17.750,12.233,-5.192,16.403,10.448,-3.529,16.100,13.533,-3.389,12.681,12.884,-0.998,11.130,14.859,-3.534,8.596,15.235,-2.124,5.480,13.846,-4.728,2.604,13.468,-2.458,-0.297,14.488,-5.250,-2.854,13.943,-5.711,-1.638,10.368,-1.903,-1.538,9.817,-1.655,-5.127,11.143,-4.507,-6.258,8.819,-2.885,-4.462,5.814,0.569,-5.932,6.693,-0.887,-9.514,6.711,-2.809,-…	MTSKNNNNVDWELIDDMSKLMFLIYDYTDKWKLQNKSVNFLDTFITQNRNLVSDKDITLLSGLKEKYPKGEFLNFYSNSSDAQCFIGTNPRKKRLCIVFRGTDSFTDCLYDLFIIKKNLGNGIKVHRGFYNQLHYDNLYQKVLTVVREQTQKHPDWSVCITGHSLGGALATLSGYLLAKELPQLQYTVYAFASPKVGNKKFKTEYNALENVYTCRICYNKDCVIAFPTFWYEHVGYNLWYEKRTDTWHFYDKAIDQRFYIYYYYNGFDHSSTNYMNIVNKTYQTICQNGVCNNMITYT
1DT3	MGYP000928093059	261	145	13	1	240	10	239	1	4.073e-11	320	269	291	EVSQDLFNQFNLFAQYSAAAYCGKNNDAPAGTNITCTGNACPEVEK-----ADATFLYSFEDSGVGDVTGFLALDNTNKLIVLSFRGSRSIENWIGNLNFDLKEINDICSGCRGHDGFTSSWRSVADTLRQKVEDAVREHPDYRVVFTGHSLGGALATVAGADLRGNGYDIDVFSYGAPRVGNRAFAEFLTVQTGGTLYRITHTNDIVPRLPPREFGYSHSSPEYWIK-------SGT-------LVPVTRND--IVKIEG	RSGLDL-EIAVLLADASAMAY--KPS------------IAIKAWAKINGLTEKCVVFDH------DNIQGFWCA--AGDVALICFRGTSNPGQWIRDLRLIPVEH----PWGRVHAGFKGGIDIAEPDIHAF--EQVAKDKK-HVWVTGHSLGGALAVLAAARLRQHGLNPFTYTYGQPRPGLGGFRDRFESELPGRLIRFVNQSDIVPRVPP-GLIYRHIGIVKTIKNLGSGLGSGGGDFGLECMGGGDESAAPPEIIDE	-18.059,2.535,16.749,-18.951,-0.781,17.630,-21.672,-1.214,15.419,-20.322,0.064,12.314,-17.830,-2.378,11.841,-19.998,-5.172,11.435,-20.007,-4.731,7.928,-17.603,-6.420,6.034,-20.028,-8.209,4.068,-18.779,-10.020,1.159,-17.202,-8.406,-1.635,-17.450,-4.977,-1.676,-15.488,-1.852,-1.183,-16.153,-0.358,2.239,-15.491,3.344,1.754,-15.436,4.014,5.579,-12.699,1.352,6.020,-10.930,2.587,2.842,-10.779,6.205,4.2…	MSDSLTILTRSGLDLEIAVLLADASAMAYKPSIAIKAWAKINGLTEKCVVFDHDNIQGFWCAAGDVALICFRGTSNPGQWIRDLRLIPVEHPWGRVHAGFKGGIDIAEPDIHAFEQVAKDKKHVWVTGHSLGGALAVLAAARLRQHGLNPFTYTYGQPRPGLGGFRDRFESELPGRLIRFVNQSDIVPRVPPGLIYRHIGIVKTIKNLGSGLGSGGGDFGLECMGGGDESAAPPEIIDEEPPEMSEEEFAQLQASLQNESGESLEGAFDLFTDHFMTEYTRLLTEIRRLSA
1DT3	MGYP000935223031	249	135	15	1	222	7	224	1	9.005e-08	221	269	270	EVSQDLFNQFNLFAQYSAAAYCGKNNDAPAGTNITCTGNACPEVEK-------ADATFLYSFEDSGVGDVTGFLALDNTNKLIVLSFRGSRS-------------IENWIGNLNFDL-KEINDICSG--CRGHDGFTSSWRSVADTLRQKVEDAVREHPDYRVVFTGHSLGGALATVAGADLRGN----GYDIDVFSYGAPRVGNRAFAEFLTVQTGGTLYRITHTNDIVPRLPPREFGYSHSSPEYWI	TFSKK--AALSAI-QGSILAYAD------------------EMTIKESCEPAGWKIHFIRSAEDSGV-DV--QCFIAEGPDDFHVFFRGTEGIDKKAPFWNIKAAVLDWWQNFKMSRVAWA--PANDRLGQAHKGFVEEFDAVQGKLID-VLSRDIEAIEKPVTAAGHSKGAALATLL-ADYLDQQFHEVTSVY--TFGSPRVFDREAANTYKNNLGAITYRFFKSNDIVPRTPL-GFRFKHVGIPIYV	-3.677,-11.524,24.490,-2.120,-13.663,22.187,-2.493,-12.187,18.793,-2.661,-15.055,16.616,0.048,-14.479,14.395,-1.606,-13.317,11.464,-0.256,-15.680,9.006,0.197,-14.918,5.294,-2.837,-15.921,3.209,-2.576,-16.473,-0.578,-6.382,-15.800,-0.745,-5.919,-12.445,1.086,-2.945,-11.588,-1.192,-5.051,-12.295,-4.290,-7.916,-10.176,-2.908,-5.463,-7.339,-2.081,-3.900,-7.302,-5.584,-7.392,-7.391,-7.189,-8.426,-4.39…	MFTSSKTFSKKAALSAIQGSILAYADEMTIKESCEPAGWKIHFIRSAEDSGVDVQCFIAEGPDDFHVFFRGTEGIDKKAPFWNIKAAVLDWWQNFKMSRVAWAPANDRLGQAHKGFVEEFDAVQGKLIDVLSRDIEAIEKPVTAAGHSKGAALATLLADYLDQQFHEVTSVYTFGSPRVFDREAANTYKNNLGAITYRFFKSNDIVPRTPLGFRFKHVGIPIYVRQYAGYIFEVNAWLATAARVVSYSPGDFGGDHDAHGYHTSIMKHRD
1DT3	MGYP000935375649	277	179	14	10	265	26	278	1	5.715e-12	348	269	284	FNLFAQYSAAAYCGKNNDAPAGTNITCTGNACPEVEKADATFLYSFEDSGVGDVTGFLALD---NTNKLIVLSFRGSRSIENWIGNLNFDLKEINDI-----CSGCRGHDGFTSS----WRSVADTLRQKVEDAVREHPDYRVVFTGHSLGGALATVA----GADLRGNGYDIDVFSYGAPRVGNRAFAEFLTVQ--TGGTLYRITHTNDIV--PRLPPR-EFGYSHSSPEYWIKSGTLVPVTRNDIVKIEGIDATGGNNQPNIPDIPAHLWYFGLI	IERYALASSLSYLK-------LEKMQ-NSEYF-ERSR--LVPLVQVVDP-VTESGATIFSDESSNNSKRLIIACRGSANTKNFGTNLNFKLVPANRLSQNSVPDGALIHEGFQDAAVGLWKELANPL----LSKIEEEGIESIIFTGHSLGAATALLTSVHYSTAIPSSSSSPAIITFGGPKFCNGVLARYLRNDVLQGSAILHFVHNRDPILSNNQKLWKDLGFVDVGIELECD--------PNNPKVYSTNDEKPKSMFSMAWNILDHCNYMGVF	-5.531,-30.694,-16.536,-5.532,-29.916,-12.958,-3.009,-27.250,-13.337,-5.032,-25.548,-16.018,-8.108,-25.411,-13.954,-6.405,-23.729,-11.155,-5.121,-21.037,-13.320,-8.533,-20.263,-14.701,-10.058,-20.009,-11.387,-7.490,-17.656,-10.241,-8.094,-15.479,-13.202,-11.791,-15.524,-12.745,-11.472,-14.578,-9.253,-9.461,-11.792,-10.255,-11.869,-10.491,-12.655,-14.488,-10.678,-10.167,-12.637,-8.626,-7.882,-12.2…	YALCIFSFMALWWHVYTLATFDSATIERYALASSLSYLKLEKMQNSEYFERSRLVPLVQVVDPVTESGATIFSDESSNNSKRLIIACRGSANTKNFGTNLNFKLVPANRLSQNSVPDGALIHEGFQDAAVGLWKELANPLLSKIEEEGIESIIFTGHSLGAATALLTSVHYSTAIPSSSSSPAIITFGGPKFCNGVLARYLRNDVLQGSAILHFVHNRDPILSNNQKLWKDLGFVDVGIELECDPNNPKVYSTNDEKPKSMFSMAWNILDHCNYMGVFVGPRVA
1DT3	MGYP000935733582	288	168	18	1	268	122	382	1	7.782e-14	405	269	393	EVSQDLFNQFNLFAQYSAAAYCGKNNDAPAGTNITCTGNACPE---VEKADATFLYSFEDSGVGD--VTGFLALDNTNKLIVLSFRGSR--SIENWIGNLNFDLKEINDICSGCRGHDGFTSSWRSVADTLRQKVEDAVREHPDYRVVFTGHSLGGALATVAGADLRGN----GYDIDVFSYGAPRVGNRAFAEFLT--VQTGGTLYRITHTNDIVPRLPPREFGYSHSSPEY-WIKSGTLVPVTRNDIVKIEGI-DATGGN----NQPNIPDI-PAHLWYFGLIGTC	SFTEPV---SNVFARYAFAAYCVNTRGAENLARWDC--PACVETPVVQNA----TGVK--VVVMNAQTFAYVGYVPQYNVILVSFAGTDPINIVNWISDIDFLPTSY-PYCQDCKVHRGFYKAYKAAHDDILATVRQFQKLHPGVPVTVTGHSLGAALSTHAAVALYHENVPLALPLY--NFGGPRVGNTAFANHLRTITKNG--MFRVVHYKDPVVQVPFHNWGFTHTSTEVFYNA--------KESS---FKICDRTNGEDKSCSYTDLPLIIPDAVYHISYGQFS	-5.719,-26.355,39.577,-3.271,-23.784,38.192,-4.421,-20.111,38.408,-1.357,-18.299,37.141,-1.872,-14.831,38.630,-0.705,-12.454,35.980,-1.162,-9.431,38.154,-0.835,-5.939,37.063,2.302,-4.513,36.058,0.806,-1.378,35.023,3.840,0.286,33.794,3.293,3.662,35.250,3.643,6.074,32.570,6.466,7.743,34.058,5.974,11.170,32.664,7.974,11.933,29.683,7.794,15.518,30.761,11.050,16.030,29.244,9.758,17.473,26.201,7.940,20…	RYRTDVSDHLCSPQKYSFLESIPRKNVFSSSSNVIRVLWLMLALIPGYFFISTISSGPPMRRNLGLVIFALLVALTLAFPEQLFHTVVTKDDVSGQPKFKSVVESNHESLLMVSDTTFNDVSFTEPVSNVFARYAFAAYCVNTRGAENLARWDCPACVETPVVQNATGVKVVVMNAQTFAYVGYVPQYNVILVSFAGTDPINIVNWISDIDFLPTSYPYCQDCKVHRGFYKAYKAAHDDILATVRQFQKLHPGVPVTVTGHSLGAALSTHAAVALYHENVPLALPLYNFGGPRVGNTAFANHLRTITKNGMFRVVHYKDPVVQVPFHNWGFTHTSTEVFYNAKESSFKICDRTNGEDKSCSYTDLPLIIPDAVYHISYGQFSFFKNYLKCKLK
1DT3	MGYP000939378666	136	77	6	109	240	3	121	1	3.605e-05	156	269	162	GHDGFTSSWRSVADTLRQKVEDAV-REHPDYRVVFTGHSLGGALATVAGADLRGNG---YDIDVFSYGAPRVGNRAFAEFLTVQTGGTLYRITHTNDIVPRLPPREFGYSHSSPEYWIKSGTLVPVTRNDIVKIEG	VHHGF--------LTGLLALWPKVLPLLPDTPLWVTGHSLGGALATLGALQVAGTGLPVAGVA--TFGSPAVGDAAFVKAFTDLLGDRSDRVVHGADPVPRSLDAYWGYAHVPSLRYL------D-RDGRLLEAPG	-14.630,-6.932,-4.604,-11.866,-9.251,-6.084,-8.389,-9.333,-4.640,-5.083,-10.868,-5.937,-5.349,-14.581,-5.153,-1.669,-14.930,-4.150,-1.945,-12.012,-1.655,-5.142,-13.506,-0.104,-3.504,-16.967,0.124,-0.484,-15.377,1.796,-2.703,-13.514,4.340,-4.832,-16.619,5.163,-1.622,-18.631,5.827,-0.468,-15.947,8.298,-3.770,-15.018,9.915,-4.018,-17.887,12.513,-0.598,-16.844,13.757,-1.380,-13.127,13.870,-4.948,-13.…	GQVHHGFLTGLLALWPKVLPLLPDTPLWVTGHSLGGALATLGALQVAGTGLPVAGVATFGSPAVGDAAFVKAFTDLLGDRSDRVVHGADPVPRSLDAYWGYAHVPSLRYLDRDGRLLEAPGWARRTWDRLAAYGHRPGKALTLGAGDHPITTYRQALEALRP
1DT3	MGYP000939589012	246	124	11	12	228	6	210	1	1.388e-07	192	269	230	LFAQYSAAAYCGKNNDAPAGTNITCTGNACPEVEKADATFLYSFEDSGVGDVTGFLALDNTNKLIVLSFRGSRSIENWIGNLNFDLKEINDICSGCRGHDGFTSSWRSVADTLRQKV--------------EDAVREHPDY---RVVFTGHSLGGALATVAG-------ADLRGNGYDIDVFSYGAPRVGN-----RAFAEFLTVQTGGTLYRITHTNDIVPRLPPREFGYSHSSPEYWIKSGTLV	LSDLFRKCAYRFNY--KQAGDS---------------VNY-AFVE---------------KGDTLFIYFEGSNSISDWFRNFWFFKKPYKEMEITFRVHGGFLAAWKEVQDIVIAKITELKSPYIKRTWYNEEEFTDTPDYKFNNIITVGYSHGGALSGLCHECVWFNRPDIRKN---IYGVGFESPRFYHGFRVKKALKERWE---NYEVVR--NHNDIVTHLPPFLFCFTHVGQLLKIGQKKKY	-4.803,6.305,17.345,-1.408,6.092,18.813,1.138,7.905,16.911,2.515,5.429,14.474,6.228,5.391,14.501,7.145,5.238,10.855,10.562,3.657,11.563,8.904,0.755,13.383,6.389,0.205,10.559,9.169,0.367,8.021,11.270,-2.248,9.887,8.408,-4.648,9.762,7.711,-4.246,6.035,11.306,-4.025,4.781,12.858,-6.704,6.927,11.454,-10.170,6.418,8.767,-10.488,8.898,6.886,-13.778,8.954,5.625,-13.308,5.537,3.347,-15.674,3.799,3.591,-1…	MEKLVLSDLFRKCAYRFNYKQAGDSVNYAFVEKGDTLFIYFEGSNSISDWFRNFWFFKKPYKEMEITFRVHGGFLAAWKEVQDIVIAKITELKSPYIKRTWYNEEEFTDTPDYKFNNIITVGYSHGGALSGLCHECVWFNRPDIRKNIYGVGFESPRFYHGFRVKKALKERWENYEVVRNHNDIVTHLPPFLFCFTHVGQLLKIGQKKKYGPIKSHYPDKVLESLKEREL
1DT3	MGYP000940900470	217	102	12	58	204	12	204	0.301	0.5144	44	269	258	SGVGDVTGFLALD-------------------------------NTNKLIVLSFRGSRSIENWIGNLNFDLKEINDICSGCRGHDGFTSSWRSVADTLRQKVEDAVREHPDYRVVFTGHSLGGALATVA-GADLRGNGYDIDVFSYGAPRVGN----------RAF-----------AEFLTVQTGGT----------------LYRITHTND-IVP	ETFDGIKLKGYYFPAKEDSKITIICSPSHRSTCFNDFSAILSFFNNKNYNVLFTVSRAHI-----GSEGN--YITLG-------KKESK-------DLIRWAEFINNKTPGQSIFIYGANLGAVNAMILTGLDYIPSNIK-GVISDSGYS--RAYDFLLYQIRHEYNLSPYPTVPIANWFAKKIAKVNFKESSPIDCLQKSTLPVLFIHGNKDQFVP	-2.505,-25.336,1.384,-6.020,-25.870,2.472,-8.223,-24.277,-0.017,-9.188,-21.073,1.767,-12.802,-20.124,1.039,-12.853,-17.052,-1.119,-15.476,-14.926,-2.790,-15.054,-12.569,-5.715,-16.451,-9.057,-5.420,-16.750,-6.045,-7.663,-16.959,-2.413,-6.465,-17.612,0.694,-8.502,-15.052,3.528,-7.854,-15.732,7.294,-7.555,-14.986,7.735,-11.293,-17.307,4.837,-12.399,-14.705,2.111,-12.942,-15.310,-1.511,-11.762,-12.5…	METLEKSEHIIETFDGIKLKGYYFPAKEDSKITIICSPSHRSTCFNDFSAILSFFNNKNYNVLFTVSRAHIGSEGNYITLGKKESKDLIRWAEFINNKTPGQSIFIYGANLGAVNAMILTGLDYIPSNIKGVISDSGYSRAYDFLLYQIRHEYNLSPYPTVPIANWFAKKIAKVNFKESSPIDCLQKSTLPVLFIHGNKDQFVPTYMGDACYRACSSPKKLLIIDDAPHIQSYFINPEKYEEAFDDFVNEYAVNQNKD
1DT3	MGYP000945568110	219	146	13	58	263	6	216	1	8.513e-12	384	269	263	SGV-GDVTGFLALDNTNKLIVLSFRGSRSIENWIG---NLNFDL---KEINDICSGCRGHDGFTSSWRSVAD-TLRQKVEDAVREHPDYRVVFTGHSLGGALATVAGADLRG-NGYDIDVFSYGAPRVGNRAFAEFLTVQTGGTLYRITHTNDIVPRLPPREFGYSH--SSPEYWIKSGTLVPVTRNDIVKIEGIDATGGNN-QPNIPDI-PAHLWYFG	THEATKGAALTGYERTSNQIFLVY-RSTVLTEWRSVMVDFTFDKVDAVDARG-TKHGQVHRGFRDAWVGLESSGVEASLNALMQAHPTAELVFVGHSLGGALATFAAAQVSSRTGKPVLLYTYGSPRLGDRQYGDWFA-TLPITYYRHVTADDPVPHAPRLLQGYVHVASGQELWFED-LAA----RKPRVCPRGENDQCANTVKLATNFAGAHATYLG	-20.948,9.036,0.970,-17.572,9.166,-0.275,-15.143,11.142,1.678,-12.145,12.670,0.121,-9.290,13.666,2.300,-6.198,15.667,1.451,-2.982,16.471,3.293,-1.388,19.690,2.106,2.121,19.177,3.387,2.480,15.858,1.763,0.292,16.487,-1.165,-1.038,13.170,-0.410,-4.665,12.269,-0.850,-6.939,9.494,0.179,-10.536,8.495,-0.676,-12.763,6.444,1.624,-16.069,5.087,0.392,-18.741,2.399,0.725,-20.019,0.379,-2.233,-23.453,-1.070,…	PDKYVTHEATKGAALTGYERTSNQIFLVYRSTVLTEWRSVMVDFTFDKVDAVDARGTKHGQVHRGFRDAWVGLESSGVEASLNALMQAHPTAELVFVGHSLGGALATFAAAQVSSRTGKPVLLYTYGSPRLGDRQYGDWFATLPITYYRHVTADDPVPHAPRLLQGYVHVASGQELWFEDLAARKPRVCPRGENDQCANTVKLATNFAGAHATYLGHKFDQCGLGPIADIQDWAQSALGKLGDTLGDAKDVAVAVPTAAADAA
1DT3	MGYP000949894563	202	138	7	49	242	7	194	1	4.034e-08	268	269	205	ATFLYSFEDSGVGDVTGFLALDNTNKLIVLSFRGSRSIENWIGNLNFDLK-EINDICSGCRGHDGFTSSWRSVADTLRQKVEDAVREHPDYRVVFTGHSLGGALATVAGADLRG----NGYDIDVFSYGAPRVGNRAFAEFLTVQTGGTLYRITHTNDIVPRLPPREF---GYSHSSPEYWIKSGTLVPVTRNDIVKIEGID	SHFIY----NNIVEIKAILSVY--DEFIILAFRYTANVKNVWQDLLYPFQVRDDNTCDKCKVQKEYNSMWNTIRDNVTADLREIQEQTKLNKLYITGISLGGGLANIAFIDINHLKIFGDVRVT--TYGAPKVGNKHWAKFFDDATHGQSRRFIVKGDPIVLLPTCLTPLCNYRQTGIKIVCYENQAL------CVQEHETD	-21.795,-12.145,-1.567,-20.728,-10.301,1.237,-21.748,-6.683,0.909,-20.226,-4.126,3.196,-22.300,-3.011,6.133,-21.022,0.469,5.530,-18.578,2.378,3.327,-16.770,5.630,3.990,-14.977,7.776,1.394,-11.954,9.756,2.310,-10.856,12.249,-0.230,-8.293,14.965,-0.811,-9.061,17.133,-3.825,-5.694,18.771,-4.086,-3.867,15.600,-4.758,-6.721,13.599,-6.179,-6.276,10.719,-3.789,-9.156,8.630,-2.716,-9.345,6.172,0.070,-12.…	TNHPIHSHFIYNNIVEIKAILSVYDEFIILAFRYTANVKNVWQDLLYPFQVRDDNTCDKCKVQKEYNSMWNTIRDNVTADLREIQEQTKLNKLYITGISLGGGLANIAFIDINHLKIFGDVRVTTYGAPKVGNKHWAKFFDDATHGQSRRFIVKGDPIVLLPTCLTPLCNYRQTGIKIVCYENQALCVQEHETDDLLTTVRDWPQ
1DT3	MGYP000960359099	251	136	18	1	234	8	216	1	5.362e-10	283	269	267	EVSQDLFNQFNLFAQYSAAAYCGKNNDAPAGTNITCTGNAC----PEVEKADATFLYSFEDSGVGDVTGFLALDNTNKL-IVLSFRGSR--SIENWIGNLNFDLKEINDICSGC--RGHDGFTSSWRSVADTLRQKVEDAVREHPDYRVVFTGHSLGGALATVAGADLRGNG--YDI-DVFSYGAPRVGNRAFAEFLTVQTGGTLYRITHT--NDIVPRLPPREFG--YSHSSPEYWIKSGTL-VPVTRND	EKTFA--EQSYLFAKISEVAY--------------LDEAGSKAAFKKLG-----FSKCLF-LDFDGSQAYILH---NKYDIVIACRGTEPSEFKDIKADLQIKLVKP----SFGKGLVHYGFKESTDDIWPELVKLIPGL---HKGQTVWCTGHSLGGAMATLIANRLNEDDAMPDLEAVFTYGSPMTGNKEFVE------GMRVTHHRWVNGADIVPKVP----GVRYKHHGQLHYMNHWGNVREMTTTQ	-22.665,-12.522,4.975,-21.512,-11.520,8.292,-18.522,-9.254,8.244,-15.502,-11.268,9.321,-12.247,-9.867,10.767,-9.581,-9.289,8.135,-7.190,-11.406,10.300,-9.487,-14.468,9.703,-9.209,-14.180,5.907,-6.667,-16.188,3.846,-3.478,-14.369,2.753,-4.864,-14.266,-0.800,-8.199,-12.763,0.318,-6.359,-10.177,2.514,-4.094,-9.292,-0.450,-7.123,-8.842,-2.740,-9.107,-6.852,-0.107,-6.231,-4.360,0.463,-5.643,-4.019,-3.…	MALQPVKEKTFAEQSYLFAKISEVAYLDEAGSKAAFKKLGFSKCLFLDFDGSQAYILHNKYDIVIACRGTEPSEFKDIKADLQIKLVKPSFGKGLVHYGFKESTDDIWPELVKLIPGLHKGQTVWCTGHSLGGAMATLIANRLNEDDAMPDLEAVFTYGSPMTGNKEFVEGMRVTHHRWVNGADIVPKVPGVRYKHHGQLHYMNHWGNVREMTTTQRFKDQMRGFLYGWKTGAVNFFISHSIERYSNNLARYADGIERDQTLFNGVN
1DT3	MGYP000966792628	236	120	14	11	222	17	216	1	7.274e-10	277	269	272	NLFAQYSAA--AYCGKNNDAPAGTNITCTGNACPEV-------EKAD-ATFLYSFEDSGVG----DVTGFLALDNTNKLIVLSFRGSR--SIENWIGNLNFDL--KEINDICSGCRGHDGFTSSWRSVADTLRQKVEDAVREHPD--YRVVFTGHSLGGALATVAGADLRGN----GYDIDVFSYGAPRVGNRAFAEFLTVQTGGTLYRITHTNDIVPRLPPREFGYSHSSPEYWI	NALSLGAAAKLAYAA------------------PEAIVAGCGQWGLTQTRFI-----ESPPESRRDT--QLFVAANAELVLVAFRGTEPMKLQDWLADANTVLIDGPF-----GGRVHAGFSLALASVWTPM----LEAILALRDRGQALWFTGHSLGAALAALAVARLRDEFDQPVHGLY--TFGQPRIGDRVFERAYNQDNRDRSFRFVNNNDVVTRVPTRLSGFSHIGTFLYF	-20.263,-5.057,-4.148,-16.893,-4.689,-2.637,-16.644,-6.317,0.821,-19.768,-8.575,0.469,-17.373,-11.527,0.149,-14.551,-10.066,2.229,-12.887,-12.536,4.634,-11.799,-10.648,7.720,-10.492,-13.752,9.572,-7.945,-14.813,6.920,-4.268,-13.822,7.108,-3.634,-15.625,3.817,-3.971,-14.263,0.243,-7.607,-14.224,-0.813,-8.829,-12.850,-4.209,-11.990,-11.205,-2.742,-9.837,-9.478,-0.060,-7.484,-8.305,-2.863,-10.339,-6…	MPFSHFRPDTTRYHPENALSLGAAAKLAYAAPEAIVAGCGQWGLTQTRFIESPPESRRDTQLFVAANAELVLVAFRGTEPMKLQDWLADANTVLIDGPFGGRVHAGFSLALASVWTPMLEAILALRDRGQALWFTGHSLGAALAALAVARLRDEFDQPVHGLYTFGQPRIGDRVFERAYNQDNRDRSFRFVNNNDVVTRVPTRLSGFSHIGTFLYFDHDHDLRADMHFWYRFLDRVAGRVEDLGRLGTDGINDHAMDAYLLGLEKNRAVYPF
1DT3	MGYP000967142950	221	114	14	14	224	3	184	1	1.054e-09	265	269	204	AQYS--AAAYCGKNNDAPAGTNITCTGNACPEVEKADATFL-YSFEDSGVGDVTGFLALDNTNKLIVLSFRGSRSIENWIGNLNFDLKEI----NDICSGCRGHDGFTSSWRSVADTLRQKVEDAVREHPDYRVVFTGHSLGGALATVAGADLRGNG-YDIDVFSYGAPRVGNRAFAEFLTVQTGGTLYRITHTNDIVPRLPPREFGYSHSS-PEY-WIKS	YKQAIQNSFSVGENSITD------------NKYQ---TSFKYYMFDEE---------V------WIV--FRPTSTKLNWIMNFIFPLQRIPYGNNE--SPIRMHWGFLKGYK---NYLRGELHKIVQENIGKKFIFTGHSLGGALARISGLDISWNYGIPIEIRSYASPRIGNRAFEES--YKKRIGAKHYVTKDDIVPKVPCLWMGYGEYNKIVLKGTGR	-2.825,8.041,17.263,-2.398,10.096,14.250,-1.103,8.717,10.888,2.148,10.595,11.216,2.924,9.066,14.675,1.948,5.662,13.355,4.287,5.876,10.409,7.130,7.369,12.445,6.722,4.600,14.976,6.821,2.023,12.161,10.432,2.867,11.498,11.390,1.594,14.811,11.739,-2.017,15.717,9.684,-2.541,18.801,6.932,-4.522,20.513,4.240,-5.905,18.220,6.536,-5.951,15.308,6.210,-8.778,12.938,9.385,-9.042,10.933,10.754,-10.962,8.015,14…	MDYKQAIQNSFSVGENSITDNKYQTSFKYYMFDEEVWIVFRPTSTKLNWIMNFIFPLQRIPYGNNESPIRMHWGFLKGYKNYLRGELHKIVQENIGKKFIFTGHSLGGALARISGLDISWNYGIPIEIRSYASPRIGNRAFEESYKKRIGAKHYVTKDDIVPKVPCLWMGYGEYNKIVLKGTGRCFKDHYPATYFANTEESIWT
1DT3	MGYP000968863389	196	123	12	21	206	150	323	1	4.413e-06	160	269	433	YCGKNNDAPAGTNITCTGNACPEVEKADATFLYSFEDSGVGDVTGFLALDNTNKLIVLSFRGSRSIENWIGNLNFDLKEIND---ICSGCRGHDGFTSSWR-SVADTLRQKVEDAVREHPDYRVVFTGHSLGGALATVAGADLR-----GNGYDIDVFSYGAPRVGNRAFA-EFLTVQTGGTLYRITHTNDIVPRL	HAQWRPRLMARQGDAGSKDVSPSTSTLAAY-------VP--AH--FIVLDHRERAVILVIRGSLDLEDVVTIVEVA-PTRHDERLLGRGC--HGGMAAAARTLVARHERL-LRDTLRRHPGYRLDLAGHSLGAGIATFAAVLLQRAMPHRTVVHAY--AFAPPCSLPLRESGRHDA-----LVDAYVYAADVVPRL	10.772,-8.726,-13.331,10.119,-10.801,-16.184,6.801,-11.577,-15.256,5.877,-8.180,-15.084,7.291,-7.591,-18.426,5.721,-10.506,-19.806,2.562,-9.341,-18.633,3.049,-6.215,-20.395,3.944,-7.898,-23.478,1.005,-10.007,-23.462,-0.984,-7.045,-23.180,0.309,-5.571,-26.239,-1.177,-8.158,-28.438,-4.637,-9.015,-27.674,-6.387,-11.713,-29.524,-9.305,-10.833,-31.829,-12.650,-9.981,-30.481,-14.646,-12.516,-28.710,-18…	MTMFLTTILLCVHPPQPLDSPPPSFRAARRLVRLLDEHVRSIPGVHRLSTRRLMQGVSILAAVEWPAQPLFNVSLTDRHERESLRRAARASVLASAAYSTFGVLLVEWARSPLQMLRAMWWMLCGLHRPRMTAFEIHTRGLGLRASDVLHAQWRPRLMARQGDAGSKDVSPSTSTLAAYVPAHFIVLDHRERAVILVIRGSLDLEDVVTIVEVAPTRHDERLLGRGCHGGMAAAARTLVARHERLLRDTLRRHPGYRLDLAGHSLGAGIATFAAVLLQRAMPHRTVVHAYAFAPPCSLPLRESGRHDALVDAYVYAADVVPRLSVGSVHGLCEAVEAVTRRHDDGSRAGSSADAETHGRWAAPPRHSTRYPPGRLRQLEPVHARRRGGCGRELLLLRPC…
1DT3	MGYP000979012495	256	142	15	1	222	3	230	1	1.889e-10	265	269	280	EVSQDLFNQFNLFAQYSAAAYCGKNNDAPAGTNITCTGNACPEVEKADATFLYSFEDSGVGD-VTGFLALDNTNKLIVLSFRG---------SRSIENWIGNLNFDLKEINDICSGC--RGHDGF----TSSWRSVADTLRQKVEDAVREHPDYRVVFTGHSLGGALATVAGADL-RGNGYDIDVFSYGAPRVGNRAFAEFLTVQTGG-TLYRITHTNDIVPRLPP-REF---------------GYSHSSPEYWI	SITLN----RKLLQACRISYTIGADGS------IHPGPDAFDWARPPQVFV------AGAARIDAALL--IETPSEVILAFRGTTPLATPVTSQMLKDWLNDFDANLVTA----SGLPGQVHDGFHKSLASLWGAIKPALAAA----MARAPALPLYVTGHSKGGALANLAAMRIARQLNARPRVITFAAAKPGNVEFQK--AYDAALPQSIRYEYTDDIVPHVPPSDMFQGIPGLDGAIKGLHLGYASVGTLRFI	5.304,0.281,27.137,4.316,3.436,25.587,1.303,2.944,23.485,2.182,2.729,19.907,0.459,5.204,17.859,-2.189,3.877,15.402,-0.062,4.966,12.386,2.975,3.066,13.777,0.733,0.017,14.411,-0.467,0.093,10.788,3.167,0.547,9.545,4.054,-2.513,11.673,1.161,-4.493,10.021,2.756,-3.541,6.641,6.183,-4.884,7.829,4.591,-8.182,9.074,2.952,-8.604,5.640,6.541,-8.795,4.112,7.384,-11.695,6.532,4.640,-13.870,5.013,6.284,-16.934…	MASITLNRKLLQACRISYTIGADGSIHPGPDAFDWARPPQVFVAGAARIDAALLIETPSEVILAFRGTTPLATPVTSQMLKDWLNDFDANLVTASGLPGQVHDGFHKSLASLWGAIKPALAAAMARAPALPLYVTGHSKGGALANLAAMRIARQLNARPRVITFAAAKPGNVEFQKAYDAALPQSIRYEYTDDIVPHVPPSDMFQGIPGLDGAIKGLHLGYASVGTLRFIDWTGRICGQSEMLRLERFTSMGKMLLTGQFDTIIHDHSIDPGSGYDKGVA
1DT3	MGYP000981822382	224	139	10	1	220	1	194	1	1.757e-10	348	269	229	EVSQDLFNQFNLFAQYSAAAYCGKNNDAPAGTNITCTGNACPEVEKADATFLYSFEDSGVGDVTGFLALDNTNKLIVLSFRGSRSIENWIGNLNFDLKEINDICSGCRGHDGFTSSWRSVADTLRQKVEDAVREHPDYRVVF--TGHSLGGALATVAGAD--LRGNGYDIDVFSYGAPRVGNRAFAEFLTVQTGGTLYRITHTNDIVPRLPPREFGYSHSSPEY	MIPNRHKNTIQLAAKYANKAY-SR--DIDG----------------------IFLEDT-TTDAQAFVAYDKDSGTLVVTGQGTTSVTDWKIDLSIWRTKV-DYLHDVKVHAGFVKQYNAVREQIHTHLADLLKTHKQSCSRILCTGHSLFGAIATMCALDCALKYD-LPIHCVSFGSPRVGSASFAKLFNGCVDV-SYRCVLEKDPVTF-TPIPLRFKHVRGGI	4.920,18.438,11.174,3.142,14.997,11.347,0.675,14.675,14.322,1.839,12.099,16.970,-1.214,9.926,16.268,-0.029,9.737,12.713,3.541,8.747,13.656,2.244,5.612,15.494,0.230,4.647,12.333,3.266,5.115,10.040,5.515,3.123,12.438,2.841,0.307,12.679,2.586,0.290,8.897,6.427,0.155,8.446,6.558,-2.780,10.983,3.981,-4.861,9.018,5.363,-3.889,5.573,8.836,-5.062,6.664,7.486,-8.314,8.395,5.759,-9.200,5.070,9.282,-9.835,3…	MIPNRHKNTIQLAAKYANKAYSRDIDGIFLEDTTTDAQAFVAYDKDSGTLVVTGQGTTSVTDWKIDLSIWRTKVDYLHDVKVHAGFVKQYNAVREQIHTHLADLLKTHKQSCSRILCTGHSLFGAIATMCALDCALKYDLPIHCVSFGSPRVGSASFAKLFNGCVDVSYRCVLEKDPVTFTPIPLRFKHVRGGIKLTPHGADEISLHNFCGCRIAHHNMKSYESHCNHL
1DT3	MGYP000982515930	234	130	12	49	227	4	237	1	8.506e-11	327	269	270	ATFLYSFE-DSGVG--DVTGFL--ALDN----TNK-LIVLSFRGSRSIENWIGNLNFDLKEINDI-----CSG---------------------CRGHDGFTSS-----WR------SVADTLRQKVEDAVREHPDYR--VVFTGHSLGGALATVAGADLRGNG---YDIDVFSYGAPRVGNRAFAEFLTVQTGGTLYRITHTNDIVPRLPPREFGYSHSSPEYWI---KSGTL	AFFFHSQSRESWDRESNWIGYIAVATDEASSALGRREIYVVWRGTTRNYEWIDVLGADLESVQSLMHPPHVSAAKQGNDGDASSSDSDDDNEKVPKVMRGWLTIYTSDDPRSQFAKTSARVQLLTKIKGLIKQYQDEKLSVTLVGHSLGASLSVLSAFDLVENGVSDIPVSAIVFGCAQVGNKAFDQRFKSYPNLNVLHVRNTIDLIPHYPGHLLGFVDTGIELVIDTRKSPSL	-18.173,-10.199,-4.373,-20.975,-8.180,-3.598,-19.806,-4.740,-4.064,-16.936,-3.677,-5.870,-16.313,-0.105,-5.628,-14.056,1.263,-8.207,-11.950,4.234,-7.361,-9.974,5.929,-10.115,-8.504,8.967,-11.731,-8.409,8.622,-15.357,-7.317,11.416,-17.099,-8.047,11.295,-20.658,-5.326,13.248,-21.336,-3.152,10.614,-21.704,-0.791,12.959,-20.874,-2.006,13.859,-17.762,0.319,11.746,-16.173,-0.324,12.442,-12.721,-3.382,1…	HREAFFFHSQSRESWDRESNWIGYIAVATDEASSALGRREIYVVWRGTTRNYEWIDVLGADLESVQSLMHPPHVSAAKQGNDGDASSSDSDDDNEKVPKVMRGWLTIYTSDDPRSQFAKTSARVQLLTKIKGLIKQYQDEKLSVTLVGHSLGASLSVLSAFDLVENGVSDIPVSAIVFGCAQVGNKAFDQRFKSYPNLNVLHVRNTIDLIPHYPGHLLGFVDTGIELVIDTRKSPSLKDSKNPSDWHNLQAMLHVVAGWNGKEKEFELKV
1DT3	MGYP000983149857	201	125	8	64	258	2	191	1	3.37e-12	412	269	213	TGFLALDNTNKLIVLSFRGSRSIENWIGNLNFDLKEINDICSGCRGHDGFTSSWRSVADTLRQKVEDAVREHPDYRVVFTGHSLGGALATVAGADLR---GNGYDIDVFSYGAPRVGNRAFAEFLTVQTGGTLYRITHTNDIVPRLPPRE-FGYSHSSPEYWIKSGTLVPVTRNDIVKIEGIDATGGNN--QPNIPDIPAH	QGFVAYDAKQNAVIVAFRGSVDTKSWIADLDAPQMAYPK-CSGCMVHVGFYKAYQEVSAEIKAQVQKILNKYRTAQIYVTGHSLGGAMAVVASLDLKSTFGKLNQFY--TYGQPRVGNQPFADYFASQIAEG-YRVIHYADIVPHLPPLTLLNYRHGGTQIWYTEDMLK------YQVCS-AEDPKCMDSIPQSQLSPSDH	5.195,-13.441,2.077,4.676,-11.970,5.500,1.813,-10.134,7.156,1.043,-9.162,10.769,-2.369,-8.876,12.452,-2.467,-7.186,15.851,-5.046,-5.539,18.181,-4.443,-2.063,19.651,-6.654,-1.942,22.802,-6.091,1.871,23.180,-7.407,2.677,19.700,-9.901,-0.203,19.515,-8.225,-1.162,16.243,-7.191,-4.198,14.255,-3.847,-3.431,12.600,-2.959,-5.390,9.452,0.685,-4.732,8.400,2.536,-6.133,5.374,6.243,-6.438,5.047,8.182,-5.171,…	MQGFVAYDAKQNAVIVAFRGSVDTKSWIADLDAPQMAYPKCSGCMVHVGFYKAYQEVSAEIKAQVQKILNKYRTAQIYVTGHSLGGAMAVVASLDLKSTFGKLNQFYTYGQPRVGNQPFADYFASQIAEGYRVIHYADIVPHLPPLTLLNYRHGGTQIWYTEDMLKYQVCSAEDPKCMDSIPQSQLSPSDHSHLQYEKLPTSIFQMLGLRRSS
1DT3	MGYP000988091951	174	122	6	51	218	7	176	1	1.268e-09	321	269	176	FLYSFEDSGVGD-VTGFLALDNTNKLIVLSFRGSRSIENWIGNLNFDLKEIN-DICSGCRGHDGFTSSWRSVADTLRQKVEDAVREHPDYRVVFTGHSLGGALATVAGADLR---GNGYDIDVFSYGAPRVGNRAFAEFLTVQTGGTLYRITHTNDIVPRLPPREF-GYSHSSP	SQIKAFANTTEGEFQGFVGYSADHNAAIVAIRGTSNFVTWFVNINKTSAEVPYPKCDGCTVNGELYNIYLEMSALVKAQVQFILSKYRNAAIYVTGHSVGGAIANLAAVDIKSTFGRVDLFY--SYGEPRVGNQIFANYSQFQ--MLMYRVIHYADSVTHVPNIGLTDYYHGGS	-21.698,1.258,-11.328,-21.367,-0.459,-8.094,-23.518,1.013,-5.634,-21.062,2.378,-3.373,-23.913,3.491,-1.553,-23.495,1.197,1.020,-20.685,2.448,2.676,-21.713,3.919,5.816,-18.570,5.423,6.722,-16.336,7.450,4.596,-13.277,9.457,4.971,-10.899,11.015,2.578,-7.200,11.329,3.187,-5.373,13.824,0.975,-1.817,14.877,0.778,-1.045,18.592,1.279,-0.636,19.090,-2.414,-3.678,17.030,-3.227,-1.751,14.801,-5.542,-2.634,1…	MYNMLHSQIKAFANTTEGEFQGFVGYSADHNAAIVAIRGTSNFVTWFVNINKTSAEVPYPKCDGCTVNGELYNIYLEMSALVKAQVQFILSKYRNAAIYVTGHSVGGAIANLAAVDIKSTFGRVDLFYSYGEPRVGNQIFANYSQFQMLMYRVIHYADSVTHVPNIGLTDYYHGGS
1DT3	MGYP000989893135	182	134	8	62	227	47	225	1	9.293e-08	243	269	248	DVTGF--LALDNTNKLIVLSFRGSRSIENWI-----GNLNFDLKEINDICSG------CRGHDGFTSSWRSVADTLRQKVEDAVREHPDYRVVFTGHSLGGALATVAGADLRGN-GYDIDVFSYGAPRVGN--RAFAEFLTVQTGGTLYRITHTNDIVPRLPPREFGYSHSSPEYWIKSGTL	KCSADWECHYEKDRNVIQVNFEQSRGFFDWVINLLFSEKAYDEFIWHNPEKDKDEQIQLKASKGWMKMYQAMKKPVKTAIKKEIAKHPDAEIEIIGWSLGSGQAQFAAQDVFWSLDKQPYVYTFGSVKPWRGGKKVRNYLKHTYKVC-YNFMHKNDIVTYM-PCFFGFFAMN-PTKLGRFNF	4.403,-18.345,10.617,1.153,-16.960,10.678,0.435,-16.780,7.167,-2.370,-18.769,7.607,-4.534,-16.093,7.739,-4.658,-15.463,4.405,-5.738,-17.612,1.831,-3.923,-15.393,-0.436,-4.377,-17.823,-2.964,-7.824,-17.374,-2.973,-7.620,-13.818,-2.980,-5.528,-13.632,-5.825,-6.767,-16.440,-7.576,-9.939,-14.989,-7.715,-8.517,-11.879,-8.853,-6.533,-13.388,-11.427,-9.009,-15.407,-13.120,-10.707,-12.554,-14.197,-7.905,…	MEYKRLDFGQYFIDTSKDWTKTGRARFPMKYKTVTFSYKLLGFIPVKCSADWECHYEKDRNVIQVNFEQSRGFFDWVINLLFSEKAYDEFIWHNPEKDKDEQIQLKASKGWMKMYQAMKKPVKTAIKKEIAKHPDAEIEIIGWSLGSGQAQFAAQDVFWSLDKQPYVYTFGSVKPWRGGKKVRNYLKHTYKVCYNFMHKNDIVTYMPCFFGFFAMNPTKLGRFNFFKLFNPHKWHTIYYDNDLYKIFK
1DT3	MGYP000995048084	223	144	10	1	219	2	196	1	2.707e-10	325	269	232	EVSQDLFNQFNLFAQYSAAAYCGKNNDAPAGTNITCTGNACPEVEKADATFLYSFEDSGVGDVTGFLALDNTNKLIVLSFRGSRSIENWIGNLNFDLKEINDIC--SGCRGHDGFTSSWRSVADTLRQKVEDAVREHPDYRVVFTGHSLGGALATVAGADLR--GNGYDIDVFSYGAPRVGNRAFAEFLTVQTGGTLYRITHTNDIVPRLPPREFGYSHSSPE	RVEDK--TSLYLMEKYQEIRLYKKNKQDP----RTIAD------------VDFYYD--IGH-AQGAFVKKDG--QFYLLIMGSNEWKDWFYNFWFFAKKVKPYNVTSNVKVHSGFYKSYLYIRDL----VHLYIKSNDVKSIIVMGQSHGAAVTVLASLDIKYNFQDIDIAAVLTGCPRTGNDDFAKSYENRIDH-VYRFKYGCDLITKLPPKFFGFADVGPE	-4.320,-15.682,4.996,-4.823,-15.947,1.432,-6.327,-12.977,-0.183,-8.787,-14.151,-2.685,-9.430,-12.287,-5.934,-12.809,-11.326,-4.430,-11.196,-9.678,-1.449,-8.650,-7.889,-3.598,-11.448,-6.617,-5.834,-13.514,-5.457,-2.833,-10.535,-3.561,-1.448,-9.789,-1.910,-4.794,-13.444,-0.834,-5.177,-13.495,0.464,-1.585,-10.270,2.333,-2.190,-11.854,4.004,-5.270,-15.071,4.795,-3.431,-13.125,6.626,-0.655,-11.024,8.4…	MRVEDKTSLYLMEKYQEIRLYKKNKQDPRTIADVDFYYDIGHAQGAFVKKDGQFYLLIMGSNEWKDWFYNFWFFAKKVKPYNVTSNVKVHSGFYKSYLYIRDLVHLYIKSNDVKSIIVMGQSHGAAVTVLASLDIKYNFQDIDIAAVLTGCPRTGNDDFAKSYENRIDHVYRFKYGCDLITKLPPKFFGFADVGPEMHVGPKDTIWRNLTIIKPILDHMLAHGMIKEFKKRI
1DT3	MGYP000996621950	225	135	13	9	222	40	249	1	4.765e-14	433	269	305	QFNLFAQYSAAAYCGKNNDAPAGTNITCTGNACPEVEK-ADA-TFLYSFEDSGVGDVTGFLALDNTNKLIVLSFRGSRSIENWIGNLNFDLKEINDICSG-----CRGHDGFTSSWRSVADTLRQKVEDAVREHPD--YRVVFTGHSLGGALATVAGAD-LRGNGYDI-DVFSYGAPRVGNRAFAEFLTVQTGGTLYRITHTNDIVPRLPPREFGYSHSSPEYWI	IAYALAALSLQAYKLDYNK---AAGGTVPPVFFEELRPLLPVDRS-FVFH-DPVTDTAGFIAGNRS--VLIVVFRGTDSVQNALSDLQATQNDL---TSLRGQGMGRVHSGFQQALDKVATRLAK----SIEQLRDRNQPVLFTGHSLGGALATLAVARAVAPPG-SVTGLYTYGSPRVGNRVFKENFDSQYAVISYRIRNFKDPVPDTPPELLDFTHVGQLVYY	-39.331,13.934,51.117,-36.122,12.213,50.248,-37.163,9.965,47.621,-36.827,12.042,44.592,-33.216,12.326,44.484,-32.230,8.833,43.967,-33.733,8.510,40.647,-31.656,11.102,39.085,-28.484,9.480,39.972,-29.359,6.202,38.584,-30.100,7.692,35.282,-26.899,9.346,34.990,-24.948,6.331,35.800,-26.676,4.395,33.244,-26.113,6.825,30.626,-22.546,6.781,31.174,-22.306,3.206,30.797,-23.536,3.375,27.518,-20.912,4.850,26…	MKRKHYHRIATIVLSVLLVSACSREITRREYSSGRYNGKIAYALAALSLQAYKLDYNKAAGGTVPPVFFEELRPLLPVDRSFVFHDPVTDTAGFIAGNRSVLIVVFRGTDSVQNALSDLQATQNDLTSLRGQGMGRVHSGFQQALDKVATRLAKSIEQLRDRNQPVLFTGHSLGGALATLAVARAVAPPGSVTGLYTYGSPRVGNRVFKENFDSQYAVISYRIRNFKDPVPDTPPELLDFTHVGQLVYYDESTRVRAGSNRVDLSCSLLQMHRCVAYHQMKRYQENAERNIERNPLSKAACLWPF
1DT3	MGYP001005855938	159	118	7	75	227	36	190	1	6.916e-07	221	269	208	LIVLSFRGSRSIENWIGNLNFDL---KEINDICSGCRGHDGFTSSWRSVADTLRQKVEDAVREHPDYRVVFTGHSLGGALATVAGADLRG-NGYDIDVFSYGAPRVG-NRAFAEFLTVQTGGTLYRITHTNDIVPRLPPREFGYSHSS-PEYWIKSGTL	KPAVLFQQSNEKTDWIKNLSYKQKKYKCED--GTVLHFHHGFYEYYELMKDDIIGSLLDWLKREPSEVILVAGWSLGAGVSEIAVQDIFYHTGVKCELINFGTPQAVYCEPTRKICANSCVSI-AEYCNNNDIVTHLPPF-LGWTHLHRIRIGSNTSLI	-3.571,-0.416,17.626,-1.680,2.912,17.718,0.231,3.883,14.475,3.674,3.198,16.083,2.431,-0.220,17.399,1.200,-1.118,13.876,4.544,-0.064,12.412,6.406,-2.193,15.054,4.070,-5.073,14.207,4.757,-4.784,10.396,8.516,-4.394,11.100,8.816,-7.581,13.452,8.888,-9.916,10.400,7.148,-12.994,11.441,5.159,-15.553,9.326,4.902,-13.568,6.105,3.542,-15.260,2.998,6.380,-15.194,0.464,5.795,-15.103,-3.282,8.799,-15.358,-5.5…	MEPYELFSYIKAKTDWVKVEKDNIIAEYKVERIDGKPAVLFQQSNEKTDWIKNLSYKQKKYKCEDGTVLHFHHGFYEYYELMKDDIIGSLLDWLKREPSEVILVAGWSLGAGVSEIAVQDIFYHTGVKCELINFGTPQAVYCEPTRKICANSCVSIAEYCNNNDIVTHLPPFLGWTHLHRIRIGSNTSLIKLLNPWKYHTSYDDASLY
1DT3	MGYP001007260244	231	142	15	9	224	17	220	1	1.777e-10	326	269	276	QFNLFAQYSAAAYCGKNNDAPAGTNITCTGNACPEVEKA-D--ATFLYSFEDSGVG----DVTGFLALDNTNKLIVLSFRGSRSIENWIGNLNFDLKEINDICSGCRGHDGFTSSWRSVADTLRQKVEDAVREH--PDYRVVFTGHSLGGALATVAGADLR--GNGYDI--DVFSYGAPRVGNRAFAEFLT--VQTGGTLYRITHTNDIVPRLPPREFGYSHSSPEYWIKS	NALTLGEAAQLAYADVA-----------QIDECVRGWGFAPDRI---HHFH-KHILVPPVDTQGYVFGN--DKAIIVAFRGTKDTLDWLTDAKFLP--VAGPNNIGKIHRGFEFALAPIVDELLQV----IGKFRDNGQAIYYTGHSLGAALATLAARSVQFASKGMHWPQGVYTFGSPCVGDAVFADAYDKELQSR--TFRFVNNADAVPRLL--MATYRHVGRLLYFDK	-3.893,6.322,19.844,-7.308,5.864,18.722,-9.159,2.798,19.514,-8.869,0.409,16.726,-12.064,1.191,15.013,-12.386,-0.926,11.978,-15.431,-1.814,9.830,-15.082,-5.195,8.134,-18.596,-5.363,6.671,-18.086,-3.266,3.624,-15.888,-3.518,0.548,-16.429,0.086,-0.392,-14.343,3.091,0.684,-14.610,3.652,4.511,-13.027,6.828,5.992,-12.408,5.257,9.429,-10.681,2.211,7.755,-8.609,4.697,5.671,-7.410,6.489,8.849,-6.658,3.204…	MSAFAFDTTDQTYNPQNALTLGEAAQLAYADVAQIDECVRGWGFAPDRIHHFHKHILVPPVDTQGYVFGNDKAIIVAFRGTKDTLDWLTDAKFLPVAGPNNIGKIHRGFEFALAPIVDELLQVIGKFRDNGQAIYYTGHSLGAALATLAARSVQFASKGMHWPQGVYTFGSPCVGDAVFADAYDKELQSRTFRFVNNADAVPRLLMATYRHVGRLLYFDKTGRAFSQTTALERFFNLINAAVSDVRAANFHVEGLEDHGMAHYVANLKANLANDLL
1DT3	MGYP001011471044	204	120	11	75	264	2	191	1	3.856e-09	294	269	195	LIVLSFRGS--RSIENWIGNLNFDLKEINDICSGCRGHDGFTSSWRSVADTLRQKVEDAVREHPDYRVVFTGHSLGGALATVAG------ADLRGNGYDIDVFSYGAPRVGNRAFAEFLTVQTGG-TLYRITHTNDIVPRLPPREFGYSHSSPEYWI-KSGTLVPVTRNDIVK---IEGIDATGGNNQPNIPDIP-AHLWYFGL	AIILSFRGTQGKSIKNWITDIDIIEIAPYSAFPSVKVCRGFYHAWDSVKQNVSRDITALFSQHPNAELWVTGHSLGAALSSFAAHHFSSIVGL-GNIVSHH--TFGSPRVGNVDFYSM--MQKEVTNSWRLTHYRDIVPHVPTVLQGYHHVPTEIFYNEA-------FSNYTICDGSGEDP--KCSDQYDIDLSVADHLHYFNF	-8.040,0.024,21.712,-6.384,-0.898,18.495,-4.778,-3.972,16.911,-1.924,-2.779,14.723,-1.025,-4.968,11.691,2.325,-3.699,10.244,3.944,-5.102,7.113,7.659,-4.797,6.453,8.986,-3.297,3.168,11.973,-4.483,1.123,15.418,-4.164,2.658,16.866,-0.793,1.629,19.842,-2.092,-0.383,17.526,-4.053,-2.530,14.847,-1.393,-3.411,16.268,-0.610,-6.945,16.504,-4.297,-7.764,13.009,-4.815,-6.351,11.494,-1.952,-8.603,13.050,-3.6…	NAIILSFRGTQGKSIKNWITDIDIIEIAPYSAFPSVKVCRGFYHAWDSVKQNVSRDITALFSQHPNAELWVTGHSLGAALSSFAAHHFSSIVGLGNIVSHHTFGSPRVGNVDFYSMMQKEVTNSWRLTHYRDIVPHVPTVLQGYHHVPTEIFYNEAFSNYTICDGSGEDPKCSDQYDIDLSVADHLHYFNFDISQ
1DT3	MGYP001011504657	231	139	12	8	231	16	211	1	1.501e-08	257	269	287	NQFNLFAQYSAAAYCGKNNDAPAGTNITCTGNACP---EVEKADATFLYSFEDSGVGDVTGFLALDNTNKLIVLSFRGSRSIENWIGNLNFDLKEINDICSGCRGHDGFTSSWRSVADTLRQKVEDAVREHPD--YRVVFTGHSLGGALATVAGADL--RGNGYDIDVFSYGAPRVGNRAFAEFLTVQTGGTLYRITHTNDIVPRLPPREFGYSHSSPEYWIKSGTLVPVT	TSLSL-ALASDLAYQS--------------FTVMQATTKAWG----LSTFQRLDHAD-TQGFVAI--APDVTLIAFRGTQEPGDFLDDIDVLPTSR----PYGRVHSGFLGAYNAIAGDL----LATLRGLPATPTKIWLTGHSLGGAVASVAAAELAQIVTFAGIQ--TFGQPLLADSAMHDFFEQTYGGRFTRFVNNQDVVPRIPP---GYQPVGHMVHFTADGGVERT	-14.080,-12.315,-4.711,-14.277,-9.815,-1.847,-15.283,-11.435,1.467,-16.502,-9.366,4.350,-16.584,-12.658,6.425,-12.856,-13.205,5.836,-12.158,-9.767,7.316,-14.582,-10.463,10.230,-13.412,-13.913,11.185,-9.703,-13.775,10.222,-10.080,-17.385,9.246,-8.349,-17.299,5.929,-5.254,-15.654,5.328,-5.461,-15.681,1.538,-9.144,-14.639,1.349,-8.404,-11.723,3.721,-5.355,-10.808,1.600,-7.421,-11.022,-1.618,-10.142,…	MFSLDALRLQTSTWQTSLSLALASDLAYQSFTVMQATTKAWGLSTFQRLDHADTQGFVAIAPDVTLIAFRGTQEPGDFLDDIDVLPTSRPYGRVHSGFLGAYNAIAGDLLATLRGLPATPTKIWLTGHSLGGAVASVAAAELAQIVTFAGIQTFGQPLLADSAMHDFFEQTYGGRFTRFVNNQDVVPRIPPGYQPVGHMVHFTADGGVERTALSAAIAEREAEPMSRPEYDRLKAEVRALKIRAMAQPMANRRAFVTSGLEFNFPIFLDHRIARYIDVLNRLAAGPA
1DT3	MGYP001011892816	241	143	10	7	234	63	277	1	1.213e-10	305	269	287	FNQFNLFAQYSAAAYCGKNNDAPAGTNITCTGNACPEVEKADATFLYSFEDSGV---GDVTG---FLALDNTNKLIVLSFRGSRSIENWIGNLNFDLKEINDIC---SGCRGHDGFTSSWRSVADTLRQKVEDAVREHPDY-RVVFTGHSLGGALATVAGADLRGNGYDIDVFSYGAPRVGNRAFAEFLTVQTGGTLYRITHTNDIVPRLPPREF---GYSHSSPEYWIKSGTLVPVTRND	YAMLTLSLQMTLESGCGNNYSLPSG-------------------F-TVTPLQGYDTAAGIQRHFGNYLHSTALGMGIVTFSGTIYPSQWYDDADIAQVPPNALNNYEEGMLVHRGFYRIYSSMKPAL----EKLLKEKPPRNQLIIAGHSLGAALATLCYFDHWSADINIQLYSFAAPRVGNIPFAAFLSSHREG-IFRVFNTEDLIPALPPPIFFGLIYEHNSEDIAFTKN-LENYSRNH	31.285,32.934,-24.529,33.924,34.215,-22.207,34.622,32.632,-18.839,32.441,35.293,-17.285,29.300,34.507,-19.556,29.547,30.848,-18.717,29.750,31.605,-14.992,26.652,33.821,-15.151,24.669,31.117,-17.008,25.695,28.469,-14.452,24.674,30.793,-11.536,21.242,31.567,-13.152,20.609,27.864,-13.676,21.580,27.055,-10.075,19.209,29.809,-8.693,16.344,28.495,-10.906,16.965,24.915,-9.669,17.043,25.995,-6.016,13.813…	MGTVEISIVVLIISVILVALFIFYRYSSRMRLASICENSNSLNLETPEITGLLPTTFDKKTGYAMLTLSLQMTLESGCGNNYSLPSGFTVTPLQGYDTAAGIQRHFGNYLHSTALGMGIVTFSGTIYPSQWYDDADIAQVPPNALNNYEEGMLVHRGFYRIYSSMKPALEKLLKEKPPRNQLIIAGHSLGAALATLCYFDHWSADINIQLYSFAAPRVGNIPFAAFLSSHREGIFRVFNTEDLIPALPPPIFFGLIYEHNSEDIAFTKNLENYSRNHTKAYLEYLRG
1DT3	MGYP001024129357	189	119	6	61	247	24	202	1	5.576e-17	561	269	236	GDVTGFLALDNTNKLIVLSFRGSRSIENWIGNLNFDLKEINDICSGCRGHDGFTSSWRSVADTLRQKVEDAVREHPDYRVVFTGHSLGGALATVAGADLRGN-GYDIDVFSYGAPRVGNRAFAEFLTVQTGGTLYRITHTNDIVPRLPPRE-FGYSHSSPEYWIKSGTLVPVTRNDIVKIEGIDATGGN	LDIQGFVGYSSTHHAIIAAFRGSVDIKNWLANIDFKQDTYPK-CSGCLVHEGFYKGYAEVSAIVKAQVQLILNKYSTAAIYVTGHSLGGALATLATLDIKATFGKLSEFYSYGEPRIGNAAFATYFA--SQMPVHRVIHYADIVPHVPPYGLNNYTQGGAQYWYAENMQT------YKTCT-AEDSTCA	-22.876,7.861,8.233,-23.061,8.332,4.530,-23.382,5.230,2.695,-20.681,4.846,0.328,-22.275,3.654,-2.704,-21.360,0.118,-3.297,-20.303,-1.048,-0.131,-21.755,-4.187,0.591,-21.727,-4.363,4.164,-19.280,-6.721,5.171,-21.109,-7.732,8.173,-17.858,-8.511,9.820,-16.639,-5.002,9.909,-17.729,-2.719,12.665,-16.676,0.756,13.712,-15.972,1.814,10.201,-14.665,5.321,9.563,-14.511,6.136,5.915,-12.415,9.121,4.812,-12.2…	MQKVPGHRSNPTLTQVKAFLNTTLDIQGFVGYSSTHHAIIAAFRGSVDIKNWLANIDFKQDTYPKCSGCLVHEGFYKGYAEVSAIVKAQVQLILNKYSTAAIYVTGHSLGGALATLATLDIKATFGKLSEFYSYGEPRIGNAAFATYFASQMPVHRVIHYADIVPHVPPYGLNNYTQGGAQYWYAENMQTYKTCTAEDSTCADSLPPTDLNTNDHQLSAYLQMPASLLQMLGLRRD
1DT3	MGYP001024314491	234	113	11	1	207	34	234	1	5.432e-11	296	269	236	EVSQDLFNQFNLFAQYSAAAYCGKNNDAPAGTNITCTGNACPEVEKADATFLYSFEDSGVGDVTGFLALDNTNK----LIVLSFRGSRSIENWIGNLNFDLK-----EINDICSGCRGHDGFTSSWRSVADTLRQKVEDAVREHPDYRVVFTGHSLGGALATVAGADLR-----GNGYDIDVFSYGAPRVGNRAFAEFLT-------------VQTGGTLYRITHTNDIVPRLP	KVGFDHFNTYI--------SYGIGLGD---------TKD---------TYVVLYFK-SSVTDTTGFVALYTDTERQEDNIVISFRGAKDFSAWIQSIRSVKEPSPWPDKEN--PGARVHTNFLDHYSDIAATVRSAVMVLTKRYPSARMVVIGHSLGGAVATLCAADLKFHLGWSAKIELV--TFESPRVGNLQFANFMTHIFQLAQVDPNTSSEVMTRRF--TNRDDPVPTIP	-28.362,-7.854,15.847,-25.159,-7.188,17.493,-25.025,-3.750,18.850,-21.590,-2.683,18.864,-20.621,-0.682,21.794,-19.718,2.893,21.339,-16.458,3.843,22.761,-15.822,7.451,23.003,-12.448,8.274,23.371,-11.074,11.577,22.910,-8.917,12.009,20.186,-8.020,15.440,20.633,-7.664,17.789,17.937,-8.041,16.992,14.634,-10.265,19.528,13.235,-12.368,17.431,11.312,-14.370,18.993,8.721,-17.868,19.751,10.042,-19.771,16.8…	MRTRPGIIGWLGGLQLPTAVKSHCFPGLVVLDAKVGFDHFNTYISYGIGLGDTKDTYVVLYFKSSVTDTTGFVALYTDTERQEDNIVISFRGAKDFSAWIQSIRSVKEPSPWPDKENPGARVHTNFLDHYSDIAATVRSAVMVLTKRYPSARMVVIGHSLGGAVATLCAADLKFHLGWSAKIELVTFESPRVGNLQFANFMTHIFQLAQVDPNTSSEVMTRRFTNRDDPVPTIPVD
1DT3	MGYP001025906171	262	154	14	1	227	9	248	1	4.034e-08	206	269	270	EVSQD--LFNQFN--LFAQYSAAA--------YCGKNNDAPA------GTNITCTGNACPEVEKADATFLYSFEDSGV----GDV----TGF-LALDNTNKLIVLSFRGSRSIENWIGNLNFDLKEINDICSGCRGHDGFTSSWRSVADTLRQKVEDAVREHPDYRVVFTGHSLGGALATVAGADLRGNGYDIDVFSYGAPRVGNRAFAEFLTVQTGGTLYRITHTNDIVPRLPPR------EFGYSHSS--PEYWIKSGTL	KLEEKEILFLSKKYFLPAIHNVYHKFYLESYSSVTK--KWPILARSEFPESMPLSKD---------FKLVDRVASAGLMPPFGKTEVLKGGLFCHVYTFKKQNIITFRGSAGLLDWLRNSMAYMVPLTEEEPDVKVHAGF--------LQIFQDLEPLLKEYQQEGVWMTGHSLGAAIATFFA--QSTDFPKAKLLTYGSPRVGNEEFIKRLKANTQFH-FRVETENDPIPFLPLEVKPMGGLFDYKDGGDLIRLPLANATI	-8.225,3.393,24.570,-6.331,6.101,23.160,-7.447,7.191,19.913,-4.334,5.909,18.137,-5.642,7.324,14.871,-5.120,10.955,16.072,-1.638,10.472,17.466,1.144,12.306,15.831,3.544,9.502,16.618,2.941,5.793,17.066,5.131,3.148,18.714,5.851,-0.185,16.932,3.336,-2.126,19.203,0.528,0.418,18.404,1.256,0.072,14.667,1.077,-3.717,14.962,-2.180,-3.461,16.967,-3.706,-1.062,14.314,-2.460,-3.430,11.588,-4.127,-6.520,13.12…	MLDLFDEPKLEEKEILFLSKKYFLPAIHNVYHKFYLESYSSVTKKWPILARSEFPESMPLSKDFKLVDRVASAGLMPPFGKTEVLKGGLFCHVYTFKKQNIITFRGSAGLLDWLRNSMAYMVPLTEEEPDVKVHAGFLQIFQDLEPLLKEYQQEGVWMTGHSLGAAIATFFAQSTDFPKAKLLTYGSPRVGNEEFIKRLKANTQFHFRVETENDPIPFLPLEVKPMGGLFDYKDGGDLIRLPLANATIVDKLKAHLPSVYLQAIDQALDL
1DT3	MGYP001026633343	204	114	5	63	239	14	215	1	5.107e-11	371	269	259	VTGFLALDNTNKLIVLSFRGSRSIENWIGNLNFDLK------------EINDICSGCRGHDGFTSSWRSVADTLRQKVEDAVREHPDYRVVFTGHSLGGALATVAGADLRGNGYDIDVFSYGAPRVGNRAFAEFL-----TVQ----------TGGTLYRITHTNDIVPRLPPREFGYSHSSPEYWIKSGTLVPVTRNDIVKIE	GSGYCALDNNRKTILLVFRGTASRRDWISNIDFLPTKYQPISSDGTLGDLDYECDDCKVHRGFYNILKTSMVPIIEKILALKEKHPEYQLWVIGHSLGGALTFLTGLEFQLLGLNPLVVSFANPKIGDKNLMEFADRHFKTTQVAEFIDKFHDFNRGYIRVTHKGDIVPQLPP-SIFYHHSGYEYFI-NKKDLPQNAENLVRKG	0.122,3.769,21.257,1.865,0.499,22.232,4.338,-1.172,20.036,3.616,-4.855,19.604,6.377,-6.160,17.256,9.120,-5.205,14.669,9.438,-6.736,11.355,13.095,-7.360,11.981,11.988,-9.585,14.708,10.400,-11.663,11.966,13.433,-12.047,9.833,12.003,-9.771,7.320,13.714,-7.818,4.689,11.219,-5.146,5.041,11.369,-2.513,7.630,8.279,-1.804,9.742,6.342,-2.304,12.966,2.898,-3.182,14.377,1.343,-1.049,17.149,-1.960,-0.802,19.…	VVKVFNFNDLGSVGSGYCALDNNRKTILLVFRGTASRRDWISNIDFLPTKYQPISSDGTLGDLDYECDDCKVHRGFYNILKTSMVPIIEKILALKEKHPEYQLWVIGHSLGGALTFLTGLEFQLLGLNPLVVSFANPKIGDKNLMEFADRHFKTTQVAEFIDKFHDFNRGYIRVTHKGDIVPQLPPSIFYHHSGYEYFINKKDLPQNAENLVRKGPINFDDCEDEVEAANIGNPTKYWPAAFLKNEHVSYFIRISGCDD
1DT3	MGYP001032559349	167	112	10	1	158	26	176	1	0.000122	148	269	185	EVSQDLFNQFNLFAQYSAAAYCGKNNDAPAGTNITCTGNACPEVEKAD-ATFLYSFEDSGV-GDVTGFLALDNTNKLIVLSFRGSRSIENWIGNLNFDLKEINDICSGC-RGHDGFTSSWRSVADTLRQKVEDAVREHPDY------RVVFTGHSLGGALATVAGAD	NILVEDRD----YIRFCEESQSKK--GPRTLQFKDGDRPSCH-----NTWEVTKV--VSHKADFTRAKFYVNECRGELVVAFPGTDDVADAVANVAAFRKSCP-ITNGCGSIHAGFLEYYNSLRDGV--MAELALTSSKSGSYSSVSKVTFVGHSQGGALATIAAYE	-54.569,-2.639,-22.066,-54.405,-4.593,-18.924,-51.291,-6.394,-19.675,-49.192,-3.203,-19.719,-50.067,-2.208,-16.268,-48.539,-5.129,-14.567,-45.181,-4.702,-16.077,-44.763,-1.224,-14.766,-45.350,-2.218,-11.177,-42.808,-4.952,-11.268,-40.187,-2.640,-12.708,-40.744,-0.181,-9.873,-40.277,-2.839,-7.223,-37.112,-4.046,-8.781,-35.719,-0.518,-8.979,-36.686,0.096,-5.416,-35.177,-3.072,-4.247,-32.037,-2.295,…	KKANMMTHKLLGLLVLSFLLSVVTCNILVEDRDYIRFCEESQSKKGPRTLQFKDGDRPSCHNTWEVTKVVSHKADFTRAKFYVNECRGELVVAFPGTDDVADAVANVAAFRKSCPITNGCGSIHAGFLEYYNSLRDGVMAELALTSSKSGSYSSVSKVTFVGHSQGGALATIAAYEAQVRENQGK
1DT3	MGYP001037592450	221	130	13	1	207	2	197	1	1.229e-10	302	269	285	EVSQDLFNQFNLFAQYSAAAYCGKNNDAPAGTNITCTGNACPEVEKA--DATFLYSFED----SGVGDVTGFLALDNTNKLIVLSFRG-SRSIENWIGNLNFDLKEINDICSGCRGHDGFTSSWRSVADTLRQKVEDAVREHPDYRVVFTGHSLGGALATVAG-------ADLRGNGYDIDVFSYGAPRVGNRAFAEFLTVQTGGTLYRITHTNDIVPRLP	AIGSAL--RRKLWQATRLAEKIDSAGKLPADYQHT---EA-YRSGGFQGDV---YAIGAGIENID----AGLVGMT--DIGLVIAFRGTNGTFEDWMNNFLGELTAYPG---GGRVHTGFWRSVQNVHTYLFEKAQELSAKYAPTALYLTGHSKGGAMATLTGSELCRLMRDKLPK---PEVITFAAPRVGDKDYANA----YPCKHTRFESCRDIVPHLP	6.009,8.332,17.889,7.956,5.827,15.897,6.223,2.632,14.934,7.393,-0.147,17.223,9.324,-3.053,15.636,6.694,-5.567,16.749,3.820,-3.725,14.970,5.968,-3.111,11.861,6.782,-6.860,11.707,3.172,-7.914,11.974,2.014,-5.515,9.253,4.861,-6.653,6.981,3.786,-10.274,7.561,0.186,-9.254,6.689,1.588,-7.695,3.493,3.467,-10.943,2.748,0.237,-12.899,3.283,-1.594,-10.593,0.782,1.247,-11.267,-1.787,0.076,-14.984,-1.608,-3.…	MAIGSALRRKLWQATRLAEKIDSAGKLPADYQHTEAYRSGGFQGDVYAIGAGIENIDAGLVGMTDIGLVIAFRGTNGTFEDWMNNFLGELTAYPGGGRVHTGFWRSVQNVHTYLFEKAQELSAKYAPTALYLTGHSKGGAMATLTGSELCRLMRDKLPKPEVITFAAPRVGDKDYANAYPCKHTRFESCRDIVPHLPLTPQEGELMHCVFENFTGLFERYLTASMTQYAPLGTLEWIVPAGMGASYATSNAHGETLNALYYVMVELALKGRFSELGAYHTDDYIC
1DT3	MGYP001037696448	164	113	8	51	204	5	154	1	1.048e-05	194	269	167	FLYSFE------DSGVGDVTGFLALDNTNKLIVLSFRGSRSIENWIGNLNFDLKEINDICSGCRGHDGFTSSWRSVADTLRQKVEDAVREHPDYRVVFTGHSLGGALATVAGADLR----GNGYDIDVFSYGAPRVGNRAFAEFLTVQTGGTLYRITHTNDIVP	IIFEPDLSDYTGKAT--PF--IITNSDELNTIFMTCRGSYCFKDFLTDLKANAANV----YGGLMHSGVLDSSLSVMALVKDFLVQTSKSNGNRPVIITGHSLGGAVASAVVEQMKRDIPDFPIRGII--FAPAASVSRSLWEE--SRKNVTSF--VLSGDFVP	2.861,-8.575,22.106,4.464,-8.691,18.809,1.855,-9.560,16.254,2.049,-13.181,14.851,3.359,-13.383,11.320,0.554,-15.028,9.357,1.879,-14.589,5.884,5.346,-13.897,4.350,5.654,-14.526,0.685,8.714,-16.080,-0.864,9.552,-13.369,-3.306,12.325,-15.340,-4.868,10.128,-16.030,-7.939,9.104,-12.484,-8.288,11.397,-10.964,-10.718,11.750,-7.988,-8.620,8.559,-6.435,-9.152,6.807,-7.075,-5.993,7.488,-4.894,-3.035,8.451,…	NAGKIIFEPDLSDYTGKATPFIITNSDELNTIFMTCRGSYCFKDFLTDLKANAANVYGGLMHSGVLDSSLSVMALVKDFLVQTSKSNGNRPVIITGHSLGGAVASAVVEQMKRDIPDFPIRGIIFAPAASVSRSLWEESRKNVTSFVLSGDFVPFLSFHNIASTSSD
1DT3	MGYP001041615518	265	153	13	1	222	2	254	1	4.616e-13	367	269	354	EVSQDLFNQFNLFAQYSAAAYCGKNNDAPAGTNITCTGNACPEVEKADATFLYSFEDSGV-GDVTGFLALDNTNKLIVLSFRGSRSIENWIGNLNFDLKEINDI-------CSG--------------------CRGHDGFTSSWRSVADTLRQKVEDAVREHPDYRVVFTGHSLGGALATVAG-------ADLRGNGYDIDVFSYGAPRVGNRAFA-EFLTVQTGGTLYRITHTNDIVPRLP------PREF-GYSHSSPEYWI	RVFV--LESEILMFNFMFITY--NLSGRHKSGAPLTWEEKCSLVQDPRFHLVLHT--SNPDTDTHAFVAAS--DDRIVIGFRGTVSLANVKTDMDSALVEHQLARRVKPLMQAGDDGKTPVSRSGAEYGQAYTSPLVHGGFLKAYESVRAEVTEAVQRLLAEKPDRVVFVTGHSLGGGLACLCAFDMAVGPVGLPPNS--VALTTWGCPRVGNYSFSRRFARVVPAATRFVC--EGDVITKLPFQPPLRDLTFRGWFHLGVEIVL	13.049,-5.343,12.737,9.486,-4.992,13.228,7.640,-7.832,14.542,5.114,-8.975,12.130,1.789,-8.562,13.901,-1.179,-10.098,12.152,-3.670,-7.697,13.945,-1.795,-4.691,12.572,-1.952,-6.129,9.084,-5.740,-6.769,9.449,-6.066,-3.119,10.569,-4.079,-1.950,7.465,-6.302,-4.096,5.236,-9.399,-2.394,6.728,-7.868,1.084,6.111,-6.941,0.006,2.548,-10.626,-0.944,2.052,-11.850,2.437,3.589,-9.831,4.252,0.778,-12.233,2.898,-…	ARVFVLESEILMFNFMFITYNLSGRHKSGAPLTWEEKCSLVQDPRFHLVLHTSNPDTDTHAFVAASDDRIVIGFRGTVSLANVKTDMDSALVEHQLARRVKPLMQAGDDGKTPVSRSGAEYGQAYTSPLVHGGFLKAYESVRAEVTEAVQRLLAEKPDRVVFVTGHSLGGGLACLCAFDMAVGPVGLPPNSVALTTWGCPRVGNYSFSRRFARVVPAATRFVCEGDVITKLPFQPPLRDLTFRGWFHLGVEIVLSPTGNAIIRPSPIERFITKRRLSSVEAHLRMSYGAALMAWTLRAHYGSGFMGDWWLVVVNTLFARDPQKTLRSVHPRVREVLLDSLCRPGVAYMSGKRMV
1DT3	MGYP001051848790	221	131	10	7	222	3	190	1	1.072e-10	341	269	245	FNQFNLFAQYSAAAYCGKNNDAPAGTNITCTGNACP---EVEKADATFLYSFEDSGVGDVTGFLALDNTNKLIVLSFRGSR--SIENWIGNLNFDLKEINDICSGCRGHDGFTSSWRSVADTLRQKVEDAVREHPDYRVVFTGHSLGGALATVAGADLRGNGYDIDVFSYGAPRVGNRAFAEFLTVQTGGTLYRITHTNDIVPRLPPREFGYSHSSPEYWI	FQTANVAAQGALLSYKD--------------RSGKQDFLDLG-----FVTHKFINKNG-A--QAHLVKNSKDAFIFCRGTEATELNDLLADLNLFPKTHG----EGFVHSGFRSEARKILNDVKLFVER--NKH--LNLTIAGHSLGGAMATYLAQELHHAGYTVSLYTFGSPRVGDNDFCNCMV---DIPHWRFVNNNDIVTRVPPIALGFKHSGTIKYI	-13.919,5.406,-3.163,-13.885,8.095,-0.428,-10.905,10.439,-0.823,-11.184,11.386,2.892,-10.573,7.695,3.787,-7.714,7.712,1.183,-6.161,10.712,2.982,-6.469,8.943,6.451,-5.023,5.771,4.809,-2.078,7.762,3.366,-1.354,9.543,6.718,-1.508,6.232,8.603,0.761,4.530,6.022,3.232,7.433,6.545,2.914,7.107,10.380,3.614,3.337,10.075,7.322,4.226,9.591,7.287,5.389,13.189,7.864,2.657,15.745,5.907,2.610,18.983,6.411,6.366…	MDFQTANVAAQGALLSYKDRSGKQDFLDLGFVTHKFINKNGAQAHLVKNSKDAFIFCRGTEATELNDLLADLNLFPKTHGEGFVHSGFRSEARKILNDVKLFVERNKHLNLTIAGHSLGGAMATYLAQELHHAGYTVSLYTFGSPRVGDNDFCNCMVDIPHWRFVNNNDIVTRVPPIALGFKHSGTIKYISYSGSVKRLSWGQRIVDQLRGRFRALCKFQLFDGAFDHSMELYSKKIKKYVDNQK
1DT3	MGYP001055091175	264	152	16	1	222	3	243	1	8.761e-10	283	269	325	EVSQDLFNQFNLFAQYS---AAAYC-GKNNDAPAGTNITCTGNACPEVEKADATFL-YSFEDSGVGD--VTGFLALDNTNKLIVLSFRG---SRS-----IENWIGNLNFDLKEINDICSGC-RGHDGFTSSWRSVADTLRQKVEDAVREHPDYRVVFTGHSLGGALATVAGAD-----LRGNGYDIDVFSYGAPRVGNRAFAEFLTVQTGGTLYRITHTNDIVPRLPP--------REF-------------GYSHSSPEYWI	RMVDGQTAQTDCRLLCADECAYGIGPGPVLNR--------QEPYFTHAG-----FLQPPTVIDAGMDGIDAALVGVC--DSAIVVAFRGTLPPDDLSLPVVLDWLQSFHFEPVTSPLF---AGTVHSGFLDAFTRLWPQVKAAIDALRTSHPGLDVHVTGHSKGGAVATLVAWQLCALGLKPA----RVTTFASPRPGDAAFAQAYTA-LGLTHTRYENELDAVPFYPPDFDALVALHALHDKPLTDEGPMKWDYAPVGELRFI	6.729,18.595,17.279,6.578,15.135,16.172,4.007,13.269,17.964,5.347,10.101,19.192,3.357,7.273,17.958,1.684,5.570,20.792,2.881,2.048,21.448,-0.481,0.503,20.471,-0.469,2.327,17.143,3.057,1.212,16.468,2.161,-2.432,17.300,-0.876,-2.364,14.986,1.194,-0.803,12.135,3.838,-3.488,12.565,1.194,-6.245,12.271,-0.330,-4.671,9.164,3.201,-4.594,7.643,3.562,-8.339,8.587,0.157,-9.029,6.920,1.437,-7.318,3.704,4.613,…	MSRMVDGQTAQTDCRLLCADECAYGIGPGPVLNRQEPYFTHAGFLQPPTVIDAGMDGIDAALVGVCDSAIVVAFRGTLPPDDLSLPVVLDWLQSFHFEPVTSPLFAGTVHSGFLDAFTRLWPQVKAAIDALRTSHPGLDVHVTGHSKGGAVATLVAWQLCALGLKPARVTTFASPRPGDAAFAQAYTALGLTHTRYENELDAVPFYPPDFDALVALHALHDKPLTDEGPMKWDYAPVGELRFIRVDGSVVGDAPGLAASRSHEIVKALIEGHASRVAAAHSLVPTTSPTNAATAGQSTYARGVCPDLSDLSITSRQSIGLNDSVT
1DT3	MGYP001055287154	246	143	12	9	244	19	232	1	6.477e-14	414	269	278	QFNLFAQYSAAAYCGKNNDAPAGTNITCTGNA----CPEVEKADATFLYSFEDSGVGDVTGFLALDNTNKLIVLSFRGSRSIENWIGNLNFDLKEINDICSGCRGHDGFTSSWRSVADTLRQKVEDAVREHP-DYRVVFTGHSLGGALATVAGAD-----LRGNGYDIDVFSYGAPRVGNRAFAEFLTVQTGGTLYRITHTNDIVPRLPPREFGYSHSSPEYWIKSGTLVPVTRNDIVKIEGIDAT	NALMMARIAQAVYLELEDDSP-------DEKAILAQLKKYDKK---FKEVIGFNRKS-SQGAVIVN--SNYITAAFRGTDEPADWLDNLNVAAMDG-PI---GRVHSGFQRGLMEIWPEMKSAIRKARHEVGKALPLWITGHSLGGAMATLAAAELIQADDPFYG----LYTFGSPRAGDREFARTFNIEAIKRTFRFQNNNDIVTRVPARVMGYSHIGSFIYITEGK--KLT---------LDAG	-2.820,19.615,14.272,-6.114,19.149,13.052,-5.743,15.965,11.179,-3.824,14.119,13.933,-6.971,14.257,16.167,-9.461,13.109,13.553,-11.098,9.708,13.928,-10.607,7.110,11.187,-13.756,6.900,8.972,-14.017,3.132,8.611,-17.320,3.394,6.601,-16.016,5.670,3.811,-14.668,4.292,0.554,-13.801,7.759,-0.762,-10.503,9.516,-0.173,-10.169,10.892,3.370,-7.017,12.430,4.827,-7.626,10.824,8.272,-7.972,7.368,6.528,-4.730,8.…	MALANKTFKHSSTTYRPENALMMARIAQAVYLELEDDSPDEKAILAQLKKYDKKFKEVIGFNRKSSQGAVIVNSNYITAAFRGTDEPADWLDNLNVAAMDGPIGRVHSGFQRGLMEIWPEMKSAIRKARHEVGKALPLWITGHSLGGAMATLAAAELIQADDPFYGLYTFGSPRAGDREFARTFNIEAIKRTFRFQNNNDIVTRVPARVMGYSHIGSFIYITEGKKLTLDAGFWFQFLDQVSGAVNALAEKGFDGVEDHAVDGYISAILDYGDTLPKG
1DT3	MGYP001056281709	164	126	5	51	211	9	163	1	7.233e-06	205	269	186	FLYSFEDSGVGDVTGFLALDNTNKLIVLSFRGSRSIENWIGNLNFDLKEINDICSGCRGHDGFTSSWRSVADTLRQKVEDAVREHPDYRVVFTGHSLGGALATVAG---ADLRGNGYDIDVFSYGAPRVGNRAFAEFLTVQTGGTLYRITHTNDIVPRLPPREF	IVLESRNSDLFKIPFFITDSKELDTIFITCRGTYCFKDCLVDMKAEAAEF----QNGLLHKGVYKTSKALYATIFPYINEVFNNNSDKKFIITGHSLGGGVAAAVCEMFHDSIKDI-NMKCICFAPCASFSHELLE--STKKWCKSY--TMEGDFVPFCTFRNI	5.864,12.474,25.899,5.534,9.822,23.388,2.037,9.140,22.992,1.102,6.144,24.885,1.307,3.150,22.789,-1.732,3.415,20.819,-1.954,-0.294,20.817,-0.453,-3.879,21.113,1.642,-5.125,18.228,-0.127,-8.344,17.221,1.816,-9.210,14.045,5.161,-8.022,12.574,7.597,-8.697,9.786,11.032,-7.146,9.453,11.846,-9.028,6.286,13.127,-6.976,3.351,13.627,-9.610,0.788,12.541,-9.262,-2.803,8.878,-8.272,-2.827,8.616,-8.417,0.921,8…	ELPKQIGKIVLESRNSDLFKIPFFITDSKELDTIFITCRGTYCFKDCLVDMKAEAAEFQNGLLHKGVYKTSKALYATIFPYINEVFNNNSDKKFIITGHSLGGGVAAAVCEMFHDSIKDINMKCICFAPCASFSHELLESTKKWCKSYTMEGDFVPFCTFRNIVDLPQDSIPSTLRLYLKKIIKKR
1DT3	MGYP001061647958	252	137	10	1	219	72	298	1	4.896e-11	313	269	323	EVSQDLFNQFNLFAQYSAAAYCGKNNDAPAGTNITCTGNACPEVEKAD--ATFLYSFEDSGVGDVTGFLALDNTNKLIVLSFRGSRSIENWIGNLNFDLK----------------EINDICS---G--CRGHDGFTSSWRSVADTLRQKVEDAVREHPDYRVVFTGHSLGGALATVAGADLRGNGYDIDVFSYGAPRVGNRAFAEFLTVQTGGTLYRITHTNDIVPRLPPR-----EF-----GYSHSSPE	KYQENM--AQYVFNLISVLGSNKK------------------ELIQKQKGLDVIKKLYNSTEDKPFGVIFYDKANKTLFIIFRGTINIGEWMQDFDVSQKSYTLPIIKNSTKNKNNNIQSMFSLSPGNIVKIHSGFIDVYTKF----RLELLNKVKIIKPSTIIVSGHSLGAAVATIVGTELYMKGYDTIIYNYASPKVGNEVFSKVIK-DNSIPLYRHVNTSDIIPTLPPSVVPNLNIPSKPYFYSHSGKE	36.522,21.362,-47.391,36.039,24.632,-45.715,32.279,24.845,-46.131,31.716,21.426,-44.435,33.898,22.395,-41.475,31.914,25.442,-40.873,28.550,23.620,-41.187,29.785,21.026,-38.716,30.882,23.535,-36.185,27.590,25.468,-36.442,25.595,22.275,-35.931,27.732,21.410,-32.911,27.286,24.774,-31.382,23.462,24.662,-31.954,23.465,21.249,-30.383,25.371,22.392,-27.323,23.075,25.412,-26.905,19.941,23.205,-27.165,21.…	MKFWKILLITLLVVYIILTLIITVSVVILYTIYNKNKIAVFNTFENKLFCNEYYCPNTILKINDIPKQITSKYQENMAQYVFNLISVLGSNKKELIQKQKGLDVIKKLYNSTEDKPFGVIFYDKANKTLFIIFRGTINIGEWMQDFDVSQKSYTLPIIKNSTKNKNNNIQSMFSLSPGNIVKIHSGFIDVYTKFRLELLNKVKIIKPSTIIVSGHSLGAAVATIVGTELYMKGYDTIIYNYASPKVGNEVFSKVIKDNSIPLYRHVNTSDIIPTLPPSVVPNLNIPSKPYFYSHSGKEITFTDNRFSYINNHILPCYKKYLFN
1DT3	MGYP001062174842	286	172	12	1	267	18	268	1	2.326e-12	372	269	272	EVSQDLFNQFNLFAQYSAA------AYCGKNNDAPAGTNITCTGNACPEVEKADATFLYSFEDSGVGDVTGFLALDNTNKLIVLSFRGSRSIENWIGNLNFDLKEINDICSGCRGHDGFTSSWRSVADTLRQKVEDAVREHPDYRVVFTGHSLGGALATVAGADLRGNGYDI---DVFSYGAPRVGNRAFAEFLTVQTGGTLYRITHTNDIVPRLPPREFGYSHSSPEYWIKSGTLVPVTRNDIVKIEGIDATGGNNQP-----NIPDIP----AHL-WYFGLIGT	SYNEHLIETALNISQSSYCLSKIDTWDC---------------QTCSSQ-----NIYETKIE---KNSELVLFGYNNDYECIFVGFRGSSNIQNWISNIQISQIQPYA-DKEISIDKGFYHLYDNLKSEIMTTLSLMTSKYSTKQLLITGHSLGGALSTIFAFDLKYNDYDYDINSIITFGSPRVGNAYFSNYF-YSFNLYSKRVTHHNDIVPHVPEEFLKYQHIYNEVWYNENNS--------QYTICHD--ESNEDPFCSNSCAPTKCTSTTDHLNYLNISMGN	-30.133,40.021,19.085,-26.690,39.009,18.016,-26.114,35.308,18.385,-22.502,34.612,18.972,-21.730,31.387,17.591,-18.819,30.201,19.494,-16.907,28.020,17.368,-15.508,25.519,19.566,-12.400,24.492,18.063,-12.333,21.101,18.961,-8.823,20.400,18.618,-9.054,16.943,18.011,-5.757,16.097,18.733,-5.134,13.615,16.302,-3.939,10.990,18.383,-1.364,9.683,16.277,-1.972,6.267,16.899,1.193,5.027,18.362,3.564,2.998,16.…	MRIFVTFVLLCLSKIHASYNEHLIETALNISQSSYCLSKIDTWDCQTCSSQNIYETKIEKNSELVLFGYNNDYECIFVGFRGSSNIQNWISNIQISQIQPYADKEISIDKGFYHLYDNLKSEIMTTLSLMTSKYSTKQLLITGHSLGGALSTIFAFDLKYNDYDYDINSIITFGSPRVGNAYFSNYFYSFNLYSKRVTHHNDIVPHVPEEFLKYQHIYNEVWYNENNSQYTICHDESNEDPFCSNSCAPTKCTSTTDHLNYLNISMGNDGLC
1DT3	MGYP001064635500	230	117	14	13	224	4	197	1	7.738e-10	285	269	280	FAQYSAAAYCGKNNDAPAGTNITCTGNACPEVEK----AD-----ATFLYSFEDSGVGDVTGFLALDNTNKLIVLSFRGSR--SIENWIGNLNFDL--KEINDICSGCRGHDGFTSSWRSVADTLRQKVEDAVREHPDYRVVFTGHSLGGALATVAGA---DLRGNGYDIDVFSYGAPRVGNRAFAE--FLTVQTGGTLYRITHTNDIVPRLPPREFGYSHSSPEYWIKS	LASAAGLIY------QP------------PEIVERTAIADWRCAHFSFYD------VEDT--QCLVAANTEAMMVCFRGTEPDRPQDWITDLDFDLVDGPL-----GGRVHEGFYDALSRIWRLLDDEVCRLQSGW-RRQLWVTGHSLGAALATLAVARWLDAGRAVSGLY--TFGQPRTGDRSFARNFDFLLRPR--TFRIVNHLDIVTRTPPRALGYYHVGSFIHIDE	-5.351,7.435,6.728,-2.917,8.803,9.510,-3.093,5.556,11.600,-2.447,3.380,8.538,0.495,5.664,7.573,1.835,5.228,11.180,1.551,1.472,10.661,3.343,1.737,7.285,6.164,3.601,9.082,6.217,1.353,12.217,6.935,-1.825,10.205,10.504,-0.473,9.514,11.272,-0.724,13.339,12.618,-3.859,15.045,9.769,-6.504,15.522,9.797,-6.040,19.350,9.150,-2.280,18.973,6.382,-3.023,16.378,4.741,-5.560,18.729,4.973,-3.296,21.792,3.435,-0.…	ASHLASAAGLIYQPPEIVERTAIADWRCAHFSFYDVEDTQCLVAANTEAMMVCFRGTEPDRPQDWITDLDFDLVDGPLGGRVHEGFYDALSRIWRLLDDEVCRLQSGWRRQLWVTGHSLGAALATLAVARWLDAGRAVSGLYTFGQPRTGDRSFARNFDFLLRPRTFRIVNHLDIVTRTPPRALGYYHVGSFIHIDEHGELLDDICWWRRFLSGWQGAIETILDWGREGVQDHSIEGYCQHLKHARQRQRPKRSDSQPLRLVIPDPSEAPIRIRPRRRAA
1DT3	MGYP001066094858	245	137	13	8	228	4	204	1	1.115e-05	146	269	247	NQFNLFAQYSAAAYCGKNNDAPAGTNITCTGNACPEVEKADATFLYS---FEDSGVGDVTGFLALDNTNKLIVLSFRGSRS-IENWIGNLNFDLKEINDICSGCRGHDGFTSSWRSVADTLRQ------------KVEDAVREHPDYRVVFTGHSLGGALATVAGADLRGNGYDIDV-FS--YGAPRVGNRAFAEFLT-----VQTGGTLYRITHTNDIVPRLPPREFGYSHSSPEYWIKSGTLV	QNIKLYGEISITNEYGK--DILTEFNI----------DSTDFKLIGTSKLLSDTG---YQGYAYLNEKTNEIIVVHEGSVNPLNNFFEN-------LDEI----------NNDWISADGSTLQGKLLPQFNEAETFLNSIKANNQDAKIIQVGQSLGGTISELLGALDENKDIETYTYNSFGAG------RAVDDLISQGKVLSDDNSNIYNFTYKNEFVSKINP------HIGSVYVSDTTETG	-6.041,10.263,10.744,-3.515,9.900,13.544,0.005,11.223,12.767,1.506,8.532,15.024,-0.174,5.889,12.893,1.115,7.414,9.660,4.652,7.252,11.006,4.246,3.791,12.438,2.851,2.352,9.225,5.466,4.013,7.089,8.248,2.527,9.244,6.597,-0.887,9.004,6.244,-0.545,5.242,10.043,-0.540,4.983,10.918,-2.903,7.803,11.491,-5.621,5.419,13.351,-3.828,2.943,14.996,-6.237,0.780,17.490,-8.644,1.842,16.972,-8.266,5.269,15.974,-11.…	MNEQNIKLYGEISITNEYGKDILTEFNIDSTDFKLIGTSKLLSDTGYQGYAYLNEKTNEIIVVHEGSVNPLNNFFENLDEINNDWISADGSTLQGKLLPQFNEAETFLNSIKANNQDAKIIQVGQSLGGTISELLGALDENKDIETYTYNSFGAGRAVDDLISQGKVLSDDNSNIYNFTYKNEFVSKINPHIGSVYVSDTTETGKGIETFHRVQTHFENGGLEYKLDENPIALSGIIDGASLLLDFS
1DT3	MGYP001070252947	231	149	10	6	222	27	234	1	6.655e-11	325	269	297	LFNQFNLFAQYSAAAYCGKNNDAPAGTNITCTGNACPEVEKADATFLYSFEDSGVGDVTGFLALDNTNKLIVLSFRGSR-SIENWIGNLNFDLKEINDICSG---CRGHDGFTSSWRSVADTLRQKVEDAVREHPDYRVVFTGHSLGGALATVAG--ADLRGNGYDIDVFSYGAPRVGNRAFAEFLTVQ-TGGTLYRITHTN-------DIVPRLPPREFGYSHSSPEYWI	STQQNNVNEMAKLIASATED-------GKSPPKG---------WRTVHTYREQH---DKYKVFVNDKTKNVVIAYGGTEPNVGDWAKNFDAGHSELK--INGKSYGSVHNGFLQQFKRTEKEMFNHAMPYVKK--GYKLELTGHSQGGAVATIASAYAKEKYNVKKPKVVTFGSPSVGNDKFAKTYNARIKDNTRVVNTFTTINGKRHSEIVPKSPLPVMGYKHIGKLKTV	-34.948,-30.067,29.874,-31.341,-29.865,31.054,-29.571,-30.887,28.049,-30.851,-28.237,25.721,-29.304,-25.652,27.933,-25.703,-26.717,27.632,-25.615,-26.691,23.939,-27.003,-23.267,23.681,-24.419,-21.985,26.130,-21.516,-23.551,24.133,-22.795,-22.002,20.942,-23.172,-18.549,22.450,-19.588,-18.725,23.878,-18.163,-19.847,20.549,-19.938,-17.073,18.746,-18.723,-14.502,21.210,-15.146,-15.808,20.890,-15.415,…	RGIMNKHLLVLTLLTAVIICLTHASTSTQQNNVNEMAKLIASATEDGKSPPKGWRTVHTYREQHDKYKVFVNDKTKNVVIAYGGTEPNVGDWAKNFDAGHSELKINGKSYGSVHNGFLQQFKRTEKEMFNHAMPYVKKGYKLELTGHSQGGAVATIASAYAKEKYNVKKPKVVTFGSPSVGNDKFAKTYNARIKDNTRVVNTFTTINGKRHSEIVPKSPLPVMGYKHIGKLKTVTTGRGDAVSAFINHDIKSYEKATRNRPVLDKRSPIANFVKDTAGNVVKGTKKVVDGTGKVIGD
1DT3	MGYP001072480614	149	98	6	75	218	9	147	1	3.729e-07	229	269	176	LIVLSFRGSRSIENWIGNLNFDLKEINDICSGCRGHDGFTSSWRSVADTLRQKVEDAVREHPDYRVVFTGHSLGGALATVAGADLRGNG---YDIDVFSYGAPRVGNRAFAE--FLTVQTGGTLYRITHTNDIVPRLPPREFGYSHSSP	FRILVFRGTKSIEEVFIDADFLPTSLAEQGLAGSAHRGMTRQFARLWPSASSLLRARDRQ-DSKPILVTGHSLGGSLAVLNALRLKKIGLPILSLY--TSAQPRVGDQAFYDELDHWLGDRYFR--MEHILDATPRLPPS-----AGAA	-3.421,8.407,6.937,-6.359,7.641,9.227,-8.137,4.830,10.971,-11.979,4.677,10.731,-14.099,2.314,12.789,-17.210,0.567,11.674,-19.370,-1.807,13.844,-17.913,-4.841,12.085,-14.523,-3.851,10.645,-11.741,-1.181,10.610,-10.663,0.920,7.726,-6.958,1.875,7.537,-6.562,4.618,4.887,-3.275,5.845,3.406,-3.181,9.173,1.696,-1.308,10.028,-1.504,0.824,13.052,-2.033,-0.664,16.494,-2.354,1.215,16.952,-5.524,1.911,14.202…	GYLAEHREFRILVFRGTKSIEEVFIDADFLPTSLAEQGLAGSAHRGMTRQFARLWPSASSLLRARDRQDSKPILVTGHSLGGSLAVLNALRLKKIGLPILSLYTSAQPRVGDQAFYDELDHWLGDRYFRMEHILDATPRLPPSAGAASDFASIAFPEDSFLYHQLIAFAEQIDYGS
1DT3	MGYP001075542358	149	93	6	77	219	13	153	1	1.474e-08	278	269	178	VLSFRGSRSIENWIGNLNFDLKEINDICSG---CRGHDGFTSSWRSVADTLRQKVEDAVREHPDYRVVFTGHSLGGALATVAGADLR-GNGYDIDVFSYGAPRVGNRAFAEFLTVQTGGTLYRITHTNDIVP-RLPPR-EFGYSHSSPE	VITFRGSKGKRDWLRDLWLQPCAY----RGNDLRQVHAMAMASWESVASKVRK----YVVAEKPDRILITGHSLGGELCTPYADDLYIALGKMSTRITFGALPFGRRSFVDYIREYPKLPHLRFVIGLDIANFNLIHNVIFGYRHDTEA	-11.616,-9.051,-0.919,-12.210,-12.436,0.725,-13.218,-13.386,4.315,-11.942,-16.660,5.677,-12.008,-18.399,9.053,-8.369,-18.487,10.306,-7.660,-20.036,13.711,-11.239,-19.271,14.866,-11.130,-15.655,13.757,-12.929,-14.110,10.846,-10.092,-12.620,8.729,-10.793,-10.304,5.761,-7.979,-10.294,3.165,-7.965,-7.285,0.802,-5.636,-7.839,-2.167,-4.578,-5.084,-4.593,-3.150,-6.032,-7.892,-0.176,-4.263,-9.602,-0.361,…	CVTLPILGEKVTVITFRGSKGKRDWLRDLWLQPCAYRGNDLRQVHAMAMASWESVASKVRKYVVAEKPDRILITGHSLGGELCTPYADDLYIALGKMSTRITFGALPFGRRSFVDYIREYPKLPHLRFVIGLDIANFNLIHNVIFGYRHDTEATKLTPWYDLRRVSCHGIEHYITELE
1DT3	MGYP001076216994	197	108	6	93	239	6	198	1	1.26e-05	186	269	230	LNFDLKEINDICSGCRGHDGFTSSWRSVADTLRQKVEDAVREHPDYRVVFTGHSLGGALATVAGADLRGNGYDIDVFSYGAPRVGNRAFAEFLTVQTGGTLYRITHTNDIVPRL--------------------PPR-----EFG---------------------YSHSSPEYWIKSGTLVP---VTRN-DIVKIE	VAFSFLTLFGDVADELAHEGMLLSAANVVRLIEGTLEHCSRVFPSYSLVFTGHSLGAGVAALSAMLMRDRFPTVRSVGFGTPCVLSLRAAESLSD----IVTTVVVGHDIVSRLGLGTMQDLCFASNYIATTSADPAAFFGADGAPNEVACVKLMSTLRGGMTASKLYPPGRVLWVDCHNDAPPIQAARDDSLLQIN	12.110,-15.718,-20.276,8.870,-13.984,-20.405,7.898,-13.988,-16.941,4.322,-14.551,-16.635,3.133,-11.360,-15.903,0.490,-12.074,-13.554,-2.078,-10.246,-15.156,-3.081,-7.826,-12.679,-6.698,-7.475,-13.035,-9.140,-5.203,-11.503,-12.349,-5.927,-9.940,-14.975,-3.500,-9.418,-15.778,-3.787,-5.905,-19.175,-2.465,-5.785,-21.328,-2.910,-8.673,-22.209,0.462,-8.792,-19.529,2.484,-7.937,-17.864,2.860,-11.091,-14…	MCGSFVAFSFLTLFGDVADELAHEGMLLSAANVVRLIEGTLEHCSRVFPSYSLVFTGHSLGAGVAALSAMLMRDRFPTVRSVGFGTPCVLSLRAAESLSDIVTTVVVGHDIVSRLGLGTMQDLCFASNYIATTSADPAAFFGADGAPNEVACVKLMSTLRGGMTASKLYPPGRVLWVDCHNDAPPIQAARDDSLLQINAETFTELIISSHMISDHLPSRYIHYMSSLTVE
1DT3	MGYP001076431579	201	129	9	15	206	3	173	1	5.311e-06	205	269	174	QYSAAAYCGKNN----DAPAGTNITCTGNACPEVEKADATFLYSFEDSGVGDVTGFLALDNTNKLIVLSFRGSRSIENWIGNLNFDLKEINDICSGCRGHDGFTSSWRSVADTLRQKVEDAVREHPDYRVVFTGHSLGGALATVAGADLRGN----GYDIDV-FSYGAPRVGNRAFAEFLTVQTGGTLYRITHTNDIVPRL	LLSSAVYYK--NSKKHLPPNLTN-----------------IVIESNKSDFYRVPYFVVDSDELDTIFVAFRGSACLKDWHVDFLAAAIQY----QRGHVHEGVYFTSLNIFEDIKRQIRELSLKHNKRQIILTGHSLGGAVAGMTAVLFNEEMIDLKVRAVCLAP---VASFSQEVWEF--SHSYIQSY--INYGDLAPFI	0.572,-10.127,3.947,3.143,-12.243,2.051,0.462,-14.327,0.279,-1.537,-11.231,-0.597,1.603,-9.488,-1.897,2.316,-12.484,-4.056,-1.275,-13.033,-5.311,-1.515,-9.505,-6.837,0.989,-10.563,-9.602,-1.355,-13.163,-11.020,-4.291,-12.981,-13.293,-7.209,-14.084,-11.074,-5.669,-13.343,-7.690,-8.493,-15.271,-5.992,-7.026,-18.665,-6.985,-3.808,-17.885,-5.115,-5.480,-16.821,-1.828,-6.570,-18.963,1.070,-10.330,-19.…	CGLLSSAVYYKNSKKHLPPNLTNIVIESNKSDFYRVPYFVVDSDELDTIFVAFRGSACLKDWHVDFLAAAIQYQRGHVHEGVYFTSLNIFEDIKRQIRELSLKHNKRQIILTGHSLGGAVAGMTAVLFNEEMIDLKVRAVCLAPVASFSQEVWEFSHSYIQSYINYGDLAPFIS
1DT3	MGYP001081940453	210	110	14	8	203	20	189	1	8.048e-05	143	269	482	NQFNLFAQYSAAAYCGKNNDAPAGTNITCTGNACP-----------EVEKAD---ATFLYSFEDSGVGDVTGFLALDNTNKLIVLSFRGSRSIENWIGNLNFDLKEINDICSGCRGHDGFTSSWRSVADTLRQKVEDAVREHPDYRVVFTGHSLGGALATVAGADLRGNGYDIDVFSYGAPRVGNRAFAEFLTVQTGGTLYRITHTNDIV	NEIRLLSQFANAVY----ND---TVNVSGWEVITPILRDYYGLSGDLIRGNSFANADLLKIFD--GEGDANAVVAKQ--GNTLILAFRGTDSFRD-----KLD---WPKT------FDHF-QLFY----PLFEALRQYSLANPITKLWVTGHSLGGAMVEHYLDTYKGDFINGV--AFASPR------ASLNDSDTR--LLNIGHENDIV	-0.346,16.164,-10.414,-3.087,13.924,-10.122,-4.275,14.772,-6.797,-5.192,11.394,-5.878,-8.369,11.741,-4.264,-7.355,10.165,-1.283,-9.655,7.558,-0.581,-11.992,8.993,1.646,-11.616,6.415,4.103,-8.805,4.215,5.061,-9.387,0.410,4.931,-9.735,0.099,8.657,-10.887,3.587,9.220,-13.581,3.869,11.859,-14.706,7.385,12.516,-14.579,6.845,16.249,-11.857,4.157,16.637,-8.086,4.433,16.243,-5.939,1.674,14.627,-4.752,0.7…	MVENAVPSTKILDHPNLSSNEIRLLSQFANAVYNDTVNVSGWEVITPILRDYYGLSGDLIRGNSFANADLLKIFDGEGDANAVVAKQGNTLILAFRGTDSFRDKLDWPKTFDHFQLFYPLFEALRQYSLANPITKLWVTGHSLGGAMVEHYLDTYKGDFINGVAFASPRASLNDSDTRLLNIGHENDIVYSISGLRDDNANSTTNIYTVIGEEHGSGTTKEHSSSEYIYTTDRILKSAYYDRMGRDSLVIIDRTDVADDIYDEIPNFSNPDAFILGEDDDDDVIQSGRGNDVLEGLGGNDYLIGDYFSSFSGNDTLDGGKGNDTLDGGEGEDIAIYSGNYKDYKLTLSKVDFKTVTITHNGGTKEDGTDTLTNIEFAQFEDKKVPLKGLDLAFVIDTTG…
1DT3	MGYP001082667070	278	153	14	9	258	31	278	1	2.426e-14	394	269	305	QFNLFAQYSAAAYCGKNNDAPAGTNITCTGNACPEVEK------------ADATFLYSFEDSGVG--DVTGFLALDNTNKLIVLSFRGSRS-----------IENW-IGNLNFDLKEINDICSGCRGHDGFTSSWRSVADTLRQKVEDAVREHPDYRVVFTGHSLGGALATVAGADLRGNGYDI-DVFSYGAPRVGNRAFAE-FLTVQTGGTLYRITHTNDIVPRLPPREFGYSHSSPEYWIKSGTLVPVTRNDIVKIEGIDATGGNNQPNIPDIPAH	NAYLLAMANAYFY-------P-FVVAQCIGCDAEDVHRLVSGRLKHWGFAADVRYI---SRSAFMQYDTQALVAQ--TDEIVLVVFRGSEMPVGVVGRVVATLRDWLATDADMALTSFSDLGPDVEVHSGFHRGFMAVAEEIEAAVCDAVQ--AGRRLWVTGHSMGGALATLAAPWLCARDLPVAGVYTFGAPMAGGVGLTNLFRTLPIRG-FHRYVQAGDPVPALPPRPAVYQHTVPPHVIHPDGTISL------------AETGYQGP--RSLRRH	-24.465,23.436,-4.431,-23.445,20.638,-2.299,-22.689,17.548,-4.181,-25.122,14.858,-3.408,-23.983,12.510,-0.725,-22.680,9.430,-2.219,-24.553,6.342,-1.926,-23.618,4.803,1.145,-21.909,1.619,0.559,-23.948,-0.163,2.933,-21.557,-2.233,4.728,-24.417,-3.272,6.741,-22.737,-2.023,9.684,-20.358,-4.690,9.783,-17.063,-4.396,11.448,-15.336,-6.015,8.593,-11.870,-5.388,9.980,-12.680,-7.802,12.817,-11.832,-10.472,…	MRAPEPPAIETGGRDCFREFRADTREHDPVNAYLLAMANAYFYPFVVAQCIGCDAEDVHRLVSGRLKHWGFAADVRYISRSAFMQYDTQALVAQTDEIVLVVFRGSEMPVGVVGRVVATLRDWLATDADMALTSFSDLGPDVEVHSGFHRGFMAVAEEIEAAVCDAVQAGRRLWVTGHSMGGALATLAAPWLCARDLPVAGVYTFGAPMAGGVGLTNLFRTLPIRGFHRYVQAGDPVPALPPRPAVYQHTVPPHVIHPDGTISLAETGYQGPRSLRRHMVQRYCQALYGVLDEAQQRLMPPPPAA
1DT3	MGYP001083861995	197	136	6	76	261	9	190	1	1.002e-06	216	269	211	IVLSFRGSRS--------IENWIGNLNFDLKEINDICSGCRGHDGFTSSWRSVADTLRQKVEDAVREHPDYRVVFTGHSLGGALATVAGADLRG--NGYDIDVFSYGAPRVGNRAFAEFLTVQTGGTLYRITHTNDIVPRLPPREFGYSH-SSPEYWIKSGTLVPVTRNDIVKIEGIDATGGNNQPNIPDIPAHLWY	CYLVFIGTQIGLHDRLSLYKDLLTDLCLGLESIDFLNPKIKIHSKYIDNM--ICDDLLNRIIKIISELKFNKINICGHSMGCGLGLYTSIVLAHKFNNKCFNLITLDSLKIGNNALNKYVKKIFNLTHIDLINNKDIVPLFPFIYPEYLHISSKTY-------ITDREGNIKICD------DTNELNIFSNYSIKDH	4.615,2.900,13.813,1.630,1.638,15.774,-0.934,3.970,17.198,-4.317,3.232,18.743,-7.161,4.860,20.495,-10.317,3.368,22.081,-11.879,2.580,18.706,-9.161,2.367,16.121,-5.715,0.778,15.609,-3.392,2.346,13.027,-0.326,0.606,11.511,1.875,3.041,9.575,4.663,1.781,7.283,7.041,4.474,6.147,9.030,4.270,2.921,12.669,4.971,2.529,13.688,7.934,4.550,15.050,10.006,1.838,17.389,12.470,3.337,17.309,15.792,1.659,20.763,15…	MICYNEHNCYLVFIGTQIGLHDRLSLYKDLLTDLCLGLESIDFLNPKIKIHSKYIDNMICDDLLNRIIKIISELKFNKINICGHSMGCGLGLYTSIVLAHKFNNKCFNLITLDSLKIGNNALNKYVKKIFNLTHIDLINNKDIVPLFPFIYPEYLHISSKTYITDREGNIKICDDTNELNIFSNYSIKDHLMSSIITNIYKCIKRSKYEKN
1DT3	MGYP001091604361	226	138	8	1	222	15	220	1	7.093e-13	398	269	269	EVSQDLFNQFNLFAQYSAAAYCGKNNDAPAGTNITCTGNACPEVEKADATFLYSFEDSGVGDVTGFLALDNTNKLIVLSFRGSRSIENWIGNLNFDLKE-INDICSGCRGHDGFTSSWRSVADTLRQKVEDAVREHPDYRVVFTGHSLGGALATVAGADLRGNG--YDID-VFSYGAPRVGNRAFAEFLTVQTGGTLYRITHTNDIVPRLPPREFGYSHSSPEYWI	SYDQNMALHFTKLSQTSYCVSSVNQWNCP-----TCENT---------IQLDYIVENNG---VLALQGYDYTTNSMFVSFRGSSNLENWIDDIQITHVSPYN--DKKIKVSKGFYTAYSYIKEFIFQNLAEMSIKYNTKQVEITGHSLGAAEATLMIYDLFYLYPQYHITHFYTFGSPRVGNTYFVNA-TAQFSAEQYRITHYYDIVPHLPEEVLDYIHLPNEIWY	-3.774,25.136,18.811,-4.194,22.723,21.532,-5.629,20.072,19.550,-2.872,19.913,17.217,-0.405,19.369,19.904,-2.119,16.527,21.243,-2.104,14.701,18.088,1.493,14.834,17.681,2.167,13.112,20.835,0.387,10.123,20.001,2.496,9.069,17.172,5.121,7.828,19.295,3.358,5.146,20.705,3.775,2.479,18.365,6.969,0.457,18.316,7.661,-1.229,14.968,6.808,-4.989,15.217,8.771,-7.116,12.709,6.373,-10.116,13.261,3.445,-7.862,12.…	MFLQIFLLLIKNLYSYDQNMALHFTKLSQTSYCVSSVNQWNCPTCENTIQLDYIVENNGVLALQGYDYTTNSMFVSFRGSSNLENWIDDIQITHVSPYNDKKIKVSKGFYTAYSYIKEFIFQNLAEMSIKYNTKQVEITGHSLGAAEATLMIYDLFYLYPQYHITHFYTFGSPRVGNTYFVNATAQFSAEQYRITHYYDIVPHLPEEVLDYIHLPNEIWYSEQNNNFIICQDNVNEEDTNCSDSCAPVSCISTSDHLNYLNVTMGSSGC
1DT3	MGYP001097058240	203	117	15	10	193	4	176	1	4.044e-05	153	269	177	FNLFAQYSAAAYCGKNNDA-PAGTNITCTGNACPEVEKADATFLYSFEDSGV--GDVTGFLALDNTNKLIVLSFRGS---RSIENWIGNL-NFDLKEINDICSGCRGHDGFTSSWRSVADTLRQKVEDAVRE------HPDYRVVFTGHSLGGALATVAGADLRGNGYDIDVFSYGAPRVGNRAFAEFLTVQTG------GTL	SQDYAALSQDAYNDRRADPTVS-VPI----NG------VDYRVLAT---ANNRENGYQGTIYQRVDSGEIIVAHRGTEPTNGVGEFIRDVIRTD--SGMVV-------NGVNNQAS-DAIALTQRAIDIAREQGERTGRPQPPVAVTGHSLGGTLAQISAHRFQAEG--VHGETFNA----YGAAGLNMGIPAGDNNRMINHV	-13.682,-6.037,-0.176,-12.673,-2.607,-1.791,-13.520,-2.062,-5.432,-10.865,-1.607,-8.142,-12.010,2.050,-8.088,-11.222,2.281,-4.341,-7.708,0.899,-4.880,-7.266,3.341,-7.807,-8.362,6.267,-5.638,-6.076,5.170,-2.719,-3.195,4.810,-5.236,-3.866,8.406,-6.319,-4.292,9.657,-2.748,-0.770,8.295,-1.913,0.577,11.374,-3.838,-0.841,13.580,-1.127,1.338,14.478,1.836,-0.874,12.854,4.375,-0.313,12.979,8.087,-1.061,10…	MPSSQDYAALSQDAYNDRRADPTVSVPINGVDYRVLATANNRENGYQGTIYQRVDSGEIIVAHRGTEPTNGVGEFIRDVIRTDSGMVVNGVNNQASDAIALTQRAIDIAREQGERTGRPQPPVAVTGHSLGGTLAQISAHRFQAEGVHGETFNAYGAAGLNMGIPAGDNNRMINHVR
1DT3	MGYP001099849872	270	178	15	1	246	6	255	1	1.675e-12	363	269	277	EVSQDLF-NQFNLFAQYSAAAYC-----GKNNDAPAGTNITC---TGNACPEV----EKADATFLYSFEDSGVGDVTGFLALDNTNKLIVLS--FRGSRSIENWIGNLNFDLKEINDICSGCRGHDGFTSSWRSVADTLRQKVEDAVREHP--DYRVVFTGHSLGGALATVAG-------ADLRGNGYDIDVFSYGAPRVGNRAFAEFLTVQTGGTLYRITHTNDIVPRLPPREFGYSHSSPEYWIKSGTLVPVTRNDIVKIEGIDATGG	SYDHDLLMCNIKTQFCLARMSYNDNLFDNDDIIGEYVHDLAYEDTLGKY-DELPDSVFDN-CRIIENI--STKRGLQCLIVSFEQNGIKKYSVVFRGTESGCDWAHDLYTIKSKL---KKGVYVHGGFFKQLQS--ESSIDRIVKVLKKHIHMNDTCYLTGHSLGAGLATITAYILANVFSNL---NVHWNLVTFGSPRVGNKQFAIEVDSNPLITHLRVYDRLDPINYVPV--YNYFHSGIKIQFCP------STRKWEIGTGIQNTAT	14.343,-10.534,11.620,13.302,-11.873,14.730,9.812,-11.154,14.483,8.856,-12.727,11.261,10.334,-16.011,12.167,7.478,-16.358,14.486,4.783,-15.845,11.919,2.738,-18.745,10.767,3.775,-18.909,7.150,0.288,-19.881,6.026,-1.338,-16.967,7.894,1.328,-14.578,6.476,0.637,-15.786,2.909,-3.127,-15.638,3.513,-2.779,-11.960,4.582,-0.531,-11.128,1.594,-2.973,-12.785,-0.883,-5.958,-11.013,0.758,-4.239,-7.578,0.498,-…	MGELASYDHDLLMCNIKTQFCLARMSYNDNLFDNDDIIGEYVHDLAYEDTLGKYDELPDSVFDNCRIIENISTKRGLQCLIVSFEQNGIKKYSVVFRGTESGCDWAHDLYTIKSKLKKGVYVHGGFFKQLQSESSIDRIVKVLKKHIHMNDTCYLTGHSLGAGLATITAYILANVFSNLNVHWNLVTFGSPRVGNKQFAIEVDSNPLITHLRVYDRLDPINYVPVYNYFHSGIKIQFCPSTRKWEIGTGIQNTATPSWYKRRRSYHLCSHYHDILDA
1DT3	MGYP001101753691	148	83	7	82	223	1	132	1	1.226e-08	264	269	203	GSRSIENWIGNLNFDLKEINDICSGCRGHDGFTSSWRSVADTLRQKVEDAVREHPDYRVVFTGHSLGGALATVAG----ADLRGNGYDIDVFSYGAPRVGNRAFAEFLTVQTGGTLYRITHTNDIVPRLP--PREFGYSHSSPEYWIK	GDR--TDYLTNSKFNQTR---FTEHGTAHSGFVEALAHVSPELLQALDERREARPGKTVWLTGHSMGGALAILFAIENPERVD------AVYPIGAPRTVGRELAEHAS--GSLAIFRVVNNNDIVPRLPAPP---FYEHIGPTYFLT	10.436,-19.112,-12.912,9.463,-17.352,-15.926,8.649,-13.924,-14.966,5.980,-14.067,-17.589,4.066,-16.344,-15.686,3.487,-14.046,-13.093,1.787,-11.675,-15.189,-0.160,-14.098,-17.076,-1.101,-15.950,-14.311,-2.038,-13.328,-12.386,-5.459,-14.275,-12.801,-6.781,-10.966,-12.537,-9.677,-13.004,-11.594,-11.839,-12.002,-8.741,-13.220,-14.592,-6.263,-15.891,-14.142,-3.708,-14.028,-13.065,-0.545,-16.896,-11.99…	GDRTDYLTNSKFNQTRFTEHGTAHSGFVEALAHVSPELLQALDERREARPGKTVWLTGHSMGGALAILFAIENPERVDAVYPIGAPRTVGRELAEHASGSLAIFRVVNNNDIVPRLPAPPFYEHIGPTYFLTADRALLIDPPASKAWRERLRGHRKFLKKLVAEHWARKDFSAIPSDVFVDHSPRLYAEILLQLAGEAAEAQP
1DT3	MGYP001103629133	244	166	12	15	234	4	236	1	2.009e-10	268	269	309	QYSAAAYCGKNNDAPAGT---------------NITCTGNACP--EVEKAD-ATFLYSFEDSGVGDVTGFLALDNTNKLIVLSFRGSRSIENWIGNLNFDLKEINDICSGCRGHDGFTSSWRSVADTLRQKVEDAVREH--PDYRVVFTGHSLGGALATVA-GADLRGNGYDI-DVFSYGAPRVGNRAFAEFLTVQTGGTLYRITHTNDIVPRLPPREFGYSHSSPEYWIKSGTLVP--VTRND	SHEYCRYFNFQPHI-RGEYDIRNSLSLAIACLFAYEPREKIKTLALACGFPHVKVVQKYQPEENIDVKVFVMAN--DDAIIIAFRGMENSTNLRATLKSRPVKSP--CGGI--HQGFRTNLESITKD----IQEAIDQVRNGNQSLWITGHHYGGALATLMTAHYLYENTEKVSGLYTFSSPRVGDDQFYDFFEPRFGSYSFRVVNGDDAFTQSPPQKLGFKHVGTCILYDEDGAIKFNPTSQQ	-9.213,20.238,5.170,-10.573,17.475,7.156,-8.817,16.997,10.385,-7.193,13.632,10.766,-9.399,12.746,13.705,-12.437,13.233,11.633,-11.401,10.361,9.471,-11.899,7.839,12.276,-15.656,8.099,11.810,-15.082,6.553,8.344,-12.759,3.830,9.615,-14.987,0.765,9.190,-12.436,-1.948,8.589,-13.795,-5.456,7.778,-10.925,-7.902,8.345,-13.062,-10.948,7.412,-13.641,-9.811,3.845,-10.697,-11.376,2.000,-9.988,-12.125,-1.635,…	MIQSHEYCRYFNFQPHIRGEYDIRNSLSLAIACLFAYEPREKIKTLALACGFPHVKVVQKYQPEENIDVKVFVMANDDAIIIAFRGMENSTNLRATLKSRPVKSPCGGIHQGFRTNLESITKDIQEAIDQVRNGNQSLWITGHHYGGALATLMTAHYLYENTEKVSGLYTFSSPRVGDDQFYDFFEPRFGSYSFRVVNGDDAFTQSPPQKLGFKHVGTCILYDEDGAIKFNPTSQQNVFEQLSPNMANFAKISNILSPETWGLLGEQGYLRTLLKVYQKQSFDTKLLSVPQSFRNDLANGSDQLGIEVD
1DT3	MGYP001105007871	236	147	11	1	206	62	285	1	4.364e-09	238	269	413	EVSQDLFNQFNLFAQYSAAAYCGKNNDAPAGTNITCTGNACPEVEKA------DATFLYSFEDSGVGDVTGFLALDNTNKLIVLSFRGSRSIENWIGNLNFD----LKE------------INDICSGC-----RGHDGFTSSWRSVADTLRQKVEDAVREHPDYRVVFTGHSLGGALATVAGA---DLRGNGYDIDVFSYGAPRVGNRAFAEFLTVQTGGTLYRITHTNDIVPRL	EVDEALLDELAHYSHFASVAYGWKGGLFCGGLQFGRNNRVLSRRTGVKMEDIVQA-NWHSRANRP--AY--YIVRDHDRNSIVLGIRGTLSPRDVLTDLCASTGSFIIEDGYAETTRTTDNLTEAASSCPLRIECAHKGMIDGAKGVARTTGKIITAELDANPDYSLVIVGHSLGGGVAAVLAAMWSDRFLNRVRSF--GFGNPCVFPR---NSTASYTNIVS--VIGQGDPFATL	-15.091,-15.754,-22.228,-15.185,-14.349,-18.862,-11.536,-14.183,-18.432,-10.919,-12.652,-21.738,-13.404,-10.007,-20.957,-11.555,-9.316,-17.869,-8.274,-9.140,-19.526,-9.653,-6.903,-22.119,-11.115,-4.799,-19.510,-7.865,-4.608,-17.840,-6.209,-3.856,-21.038,-8.739,-1.365,-21.943,-8.198,0.176,-18.735,-4.583,0.030,-19.207,-4.891,1.205,-22.616,-6.198,4.222,-21.186,-3.079,4.430,-19.491,-0.812,4.108,-22.2…	SRALRTVKSILDNFAEYGVIDLLSLYSPRDVIASIIALSRLQAVLSDDDIKRKRFGKKKEAEVDEALLDELAHYSHFASVAYGWKGGLFCGGLQFGRNNRVLSRRTGVKMEDIVQANWHSRANRPAYYIVRDHDRNSIVLGIRGTLSPRDVLTDLCASTGSFIIEDGYAETTRTTDNLTEAASSCPLRIECAHKGMIDGAKGVARTTGKIITAELDANPDYSLVIVGHSLGGGVAAVLAAMWSDRFLNRVRSFGFGNPCVFPRNSTASYTNIVSVIGQGDPFATLSLGHIVDTTRALSTLCKEEAFREEILKRLGQAKTAQDLSKDDLKWLQNAKTYLKQQMDAEKLYPPGQLVYMSGTLFNLDPVEGVSVGQKGDLRPMHVDRFGELMVHVRMFDVSQ…
1DT3	MGYP001105854581	222	148	9	1	210	46	240	1	5.843e-08	254	269	367	EVSQDLFNQFNLFAQYSAAAYCGK-NNDAPAGTNITCTGNACPEVEKADATFLYSFEDSGVGDVTGFLALDNTNKLIVLSFRGSRSIENWIGNLNFDLKEINDICSGCRGHDGFTSSWRSVADTLRQKVEDAVREHPDYRVVFTGHSLGGALATVAGADLRGN----GYDIDVFSYGAPRVGNRAFAEFLTVQTGGTLYRITHTNDIVPRL-------PPRE	DHTPDEVRMLYYCCFLSKLIYISKQDRDIP----------------KC-LSIVFEKEDSDMCIIPYNIVNSDKLNTIFVTFRGSYCFKDFLVDIMAGAQEF----QGGHIHKGVYQTFQNLYPEIVQIITKLSDSNNHRPIIFTGHSLGAGVSATMCEQFHQDYPNYQCRCLIFAP--CATFCEKLWRKSLP--RCRCYV--TDGDFVPFLSFHNAIELPPE	23.230,-8.297,-25.859,20.626,-5.748,-25.654,20.051,-4.904,-29.043,19.225,-8.396,-29.201,16.925,-8.145,-26.450,15.025,-5.356,-27.767,14.759,-6.883,-31.035,13.724,-9.956,-29.533,11.169,-8.315,-27.564,9.822,-6.532,-30.376,9.700,-9.509,-32.328,8.285,-11.623,-29.965,5.821,-9.745,-28.610,4.183,-7.865,-30.999,4.077,-6.132,-27.943,2.956,-2.865,-27.248,5.897,-0.655,-26.657,4.830,-0.539,-23.240,5.323,-4.10…	MWKKADVMIKKTTGANPDTVMSLSFAFLFKQIFNSLSPPEQLEFVDHTPDEVRMLYYCCFLSKLIYISKQDRDIPKCLSIVFEKEDSDMCIIPYNIVNSDKLNTIFVTFRGSYCFKDFLVDIMAGAQEFQGGHIHKGVYQTFQNLYPEIVQIITKLSDSNNHRPIIFTGHSLGAGVSATMCEQFHQDYPNYQCRCLIFAPCATFCEKLWRKSLPRCRCYVTDGDFVPFLSFHNAIELPPEVVPTILKKYLDKAIHKMMGVNIYNPKLISPDINPFQQPPPPLESIFDDDNIDTIINPVPLYPPGDGFMVCLIDENTSNIKLKKVPDFHYFGKFNNNLNEFRHMMGFYKEWIEKYVENYFHEHPGEKL
1DT3	MGYP001109671102	183	119	10	5	178	8	168	1	2.488e-05	174	269	168	DLFNQFNLFAQYSAAAYCGKNNDAPAGT---NITCTGNACPEVE---KADATFLYSFEDSGVGDVTGFLALDNTNKLIVLSFRGSRSIENWIGNLNFDLKEINDICSGCRGHDGFTSSWRSVADTLRQKVEDAVREHPDYRVVFTGHSLGGALATVAGADLR---GNGYDIDVFSYGAPRVGN	IIIKELHRSALISKLSE-----LSPSDVKLINETNSTYS-DIYKLIFKNDM---CYIQNEH---V--KCYIFKYSNIIYVGIHSSMDY-----NVNSKLTHF---KDKMCIHEGVYNAFMSIEEKLIYNILNLDKNKYVKKIYVTGFGTAGAIATVVSGTLSYKYKNIYIVSCFTFGSPPVGN	5.629,-17.072,23.447,7.083,-17.672,20.201,4.423,-19.750,18.946,2.028,-17.209,19.559,3.973,-14.836,17.671,4.056,-17.128,14.881,0.513,-17.510,14.790,-0.162,-13.933,14.630,2.209,-13.590,11.869,0.603,-16.346,9.960,-2.837,-14.884,10.403,-1.681,-11.465,9.203,0.179,-13.053,6.369,-2.946,-14.895,5.246,-5.059,-11.753,5.611,-2.505,-9.680,3.678,-2.474,-12.286,0.876,-6.239,-12.025,0.618,-6.144,-8.206,0.660,-3…	KSKNMNHIIIKELHRSALISKLSELSPSDVKLINETNSTYSDIYKLIFKNDMCYIQNEHVKCYIFKYSNIIYVGIHSSMDYNVNSKLTHFKDKMCIHEGVYNAFMSIEEKLIYNILNLDKNKYVKKIYVTGFGTAGAIATVVSGTLSYKYKNIYIVSCFTFGSPPVGN
1DT3	MGYP001109687576	239	136	14	3	206	61	279	1	1.955e-09	251	269	415	SQDLFNQFNLFAQYSAAAYCGKNNDAPAGTN-----ITCTG---NACPEVEKAD------ATFLYSFEDSGVGDVTGFLALDNTNKLIVLSFRGSRSIENWIGNL----NFDLKE----INDICSG----------CRGHDGFTSSWRSVADTLRQKVEDAVREHPDYRVVFTGHSLGGALATVAGADLR---GNGYDIDVFSYGAPRVGNRAFAEFLTVQTGGTLYRITHTNDIVPRL	DKDLLEELAHYCTFANAAYGWK--------GFAFCGRLHLGGDYRVLARSTGIDRRDIVTA-KWHSKANRP--AY--YIARDVKRKAIVLAIRGSFSPRDLLTDLCASCENFIVEDELEIGEIGTYRNSTTPRLIVGRAHKGMVDAARTIAAMTGKIISEELDAHPDYKLICVGHSLGGGVAAIIAAMWQRRFRNRVRSI--GYGNPCVFP---LNLTRVFDNVIT--VECCGDPFATI	-20.302,-12.780,-29.628,-18.400,-14.879,-27.326,-15.557,-12.826,-26.191,-13.717,-15.754,-25.578,-10.945,-13.705,-25.305,-8.355,-15.913,-24.533,-6.920,-13.911,-22.061,-3.675,-15.182,-22.934,-2.278,-16.812,-20.067,-0.641,-14.340,-18.058,2.474,-14.210,-19.907,3.717,-12.394,-17.188,5.022,-15.045,-15.214,8.073,-14.188,-16.888,9.101,-11.040,-15.744,11.855,-11.532,-13.647,13.032,-14.679,-14.924,12.516,-…	MECTGKFDKCSYICSLRDLPLTSFLFSPKDVILSIVALSRLQQVLETSAPRTIDKSTVITDKDLLEELAHYCTFANAAYGWKGFAFCGRLHLGGDYRVLARSTGIDRRDIVTAKWHSKANRPAYYIARDVKRKAIVLAIRGSFSPRDLLTDLCASCENFIVEDELEIGEIGTYRNSTTPRLIVGRAHKGMVDAARTIAAMTGKIISEELDAHPDYKLICVGHSLGGGVAAIIAAMWQRRFRNRVRSIGYGNPCVFPLNLTRVFDNVITVECCGDPFATISLGHLADSTKAISKLCHDKELRDGILKRLGDSQNISRDDFEWCSNAMMFLRRQMDSEKLYPPGTIYKVSGPLLDFQSSSFDENTNNGPEEGVAAMLTSIDAIEFNELKLHARMFDVSRHI…
1DT3	MGYP001114254637	262	151	14	8	259	12	231	1	8.506e-11	293	269	259	NQFNLFA--QYSAAAYCGKNNDAPAGTNITCTGNACPEVEKADATFLYSFEDSGVG---DVTGFLALDNTNKLIVLSFRGSRSIENWIGNLNFDLKEINDICSGCRGHDGFTSSWRSVADTLRQKVEDAVRE-HPDYRVVFTGHSLGGALATVAGADLRGNGYDIDVFSYGAPRVGNRAFA-EFLTVQTGGTLYRITHTNDIVPRLPPREFGYSHSSPEYWIKSGTLVPVTRNDIVKIEGIDATGG---NNQPNIPDIPAHL	RALVLMAVLQQTYVKY--KRPRDP----VAMPPG---------YRLTAAFKGKAYAGVPSTLAFLAES--DRDAVLVFRGTIRTDEWVSDALIRQIPCPFAPRMGRIHEGFARIYDSV----RGEMAEAIRSIAGSKTLYIAGHSLGGALAVLAAADLASAGRRPVVYTFGAPRVGDPRFACRFGRLVPES--HRAANPHDLVTRLPP-----------------PVCMSLVTQ-AFYF-YRHVPGLVRVEFRSGPGYGNHA	-4.941,-22.092,11.850,-1.728,-21.013,10.824,-0.194,-19.269,13.602,-0.343,-15.654,13.296,3.237,-15.194,13.400,4.321,-11.788,13.921,0.866,-10.219,13.887,-0.038,-11.230,10.305,-3.780,-12.294,10.008,-5.271,-13.982,6.871,-8.777,-12.702,7.904,-7.472,-9.141,8.367,-5.599,-9.325,5.045,-8.823,-10.460,3.288,-10.902,-7.567,4.861,-8.232,-5.004,3.855,-8.214,-6.423,0.300,-12.043,-6.241,0.236,-11.897,-2.498,1.12…	MEEETGGWSVRRALVLMAVLQQTYVKYKRPRDPVAMPPGYRLTAAFKGKAYAGVPSTLAFLAESDRDAVLVFRGTIRTDEWVSDALIRQIPCPFAPRMGRIHEGFARIYDSVRGEMAEAIRSIAGSKTLYIAGHSLGGALAVLAAADLASAGRRPVVYTFGAPRVGDPRFACRFGRLVPESHRAANPHDLVTRLPPPVCMSLVTQAFYFYRHVPGLVRVEFRSGPGYGNHALRGYFLALARRDPAWAASLGVKFDAEDD
1DT3	MGYP001114834969	160	90	7	71	206	16	168	1	4.91e-05	158	269	202	NTNKLIVLSFRGSRSIENWIGNLNFDLKEINDICSGCRGHDGFTSSWRSVADTLRQKVEDAVREHPDYRVVFTGHSLGGALAT----------VAGADLRGNGYD-IDVFSYGAPRVGN-----RAFAE--------FLTVQTGGTLYRITHTNDIVPRL	TGLGIVVVVFRGTFSYADILVDMRFEPIQL---PCGIQVNGGMHAAVAICADAVKMALRDALRDGMRYRVLVTGHSYGGACSQLLRVISLSSPSWSNIL--NRVSRVEVVTFGAPLVFGARQSSPEEAQSGGQGGALLDRVGKDSRHY--VHQGDIVPRM	23.130,-8.009,1.810,21.440,-7.878,-1.308,22.265,-4.438,-2.231,19.227,-3.298,-3.865,16.159,-4.283,-2.477,14.255,-1.470,-1.136,12.821,-2.371,2.122,9.923,-0.157,2.759,10.363,1.690,6.024,7.204,1.519,8.145,5.930,2.114,11.694,2.878,1.214,13.856,1.573,3.925,16.162,-1.185,3.334,18.743,-3.388,6.078,20.267,-5.552,4.482,22.983,-7.730,7.596,23.662,-8.886,7.782,20.031,-9.165,3.960,19.559,-6.833,4.153,16.489,-…	QERGKLHPKWAVLKHTGLGIVVVVFRGTFSYADILVDMRFEPIQLPCGIQVNGGMHAAVAICADAVKMALRDALRDGMRYRVLVTGHSYGGACSQLLRVISLSSPSWSNILNRVSRVEVVTFGAPLVFGARQSSPEEAQSGGQGGALLDRVGKDSRHYVHQGDIVPRMLTPHSAELLGKLTEGQSRADVQQMASHIGSYGPV
1DT3	MGYP001114921023	188	118	9	2	183	55	215	1	5.843e-08	232	269	225	VSQDLFNQFNLFAQYSAAAYCGKNNDAPAGTNITCTGNACPEVEKADATFLYSFEDSGVGDVTGFLALDNTNKLIVLSF-RGSRSIENW-IGNLNFDLKEINDICSGCRGHDGFTSSWRSVADTLRQKVEDAVREHPDYRVVFTGHSLGGALATVAGADLRGN-GYD---IDVFSYGAPRVGNRAFAE	IPP-LHYEAALLSNDVY----NENEGVLSGG----------------WYRVQRFNISYDVAF--SIYRNDRRKYIGFSFQGTVPTVNDWAMINGNVLMTSF----NGHSVHAGFLNKYKNFQSIIHQYLSNTIRYDRNYKLLLTGHSQGGAVANICAYDLLHNLQYDPKKLLIVTFAAPRAGSHNYSN	-10.965,-32.306,-33.095,-10.103,-31.392,-29.532,-12.525,-29.315,-27.682,-10.516,-27.696,-25.078,-12.629,-27.254,-22.082,-12.536,-23.897,-20.640,-12.587,-23.828,-16.935,-15.190,-21.519,-15.694,-13.471,-19.188,-13.464,-16.294,-17.756,-11.933,-14.437,-16.417,-9.233,-17.112,-14.779,-7.343,-15.233,-11.795,-6.737,-17.497,-10.649,-4.171,-16.781,-7.018,-4.816,-17.427,-5.506,-1.600,-18.241,-2.088,-2.754,-…	MRSGGGKDLSQNSTFWLFPTTAVQEREECRELKKPDGTTINYCQQRGAKFHDQTIPPLHYEAALLSNDVYNENEGVLSGGWYRVQRFNISYDVAFSIYRNDRRKYIGFSFQGTVPTVNDWAMINGNVLMTSFNGHSVHAGFLNKYKNFQSIIHQYLSNTIRYDRNYKLLLTGHSQGGAVANICAYDLLHNLQYDPKKLLIVTFAAPRAGSHNYSNRMTALKPEDN
1DT3	MGYP001115683395	145	91	7	3	142	49	177	1	0.0001403	145	269	178	SQDLFNQFNLFAQYSAAAYCGKNNDAPAGTNITCTGNACPEVEKAD-ATFLYSFEDSGV--GDVTGFLALDNTNKLIVLSFRGSR--SIENWIGNLNFDLKEINDICSGCRGHDGFTSSWRSVADTLRQKVEDAVREHPDYRVVF	YNNTFAKEML--HFSGAAYCP---------STTIMDWSCSFCGEISNFLPVGT---SVNTTTDLLAFVGYKNDTNSIIVAFRGTRLLSILDWLED--LDFFAKPGICEGCMVHEGFMKDYFSIRAETIRLVQLLTAKFPSAEIVI	10.549,-55.277,67.552,9.166,-54.780,64.287,6.259,-52.794,63.244,6.944,-52.343,59.662,3.291,-52.521,58.567,3.569,-52.920,54.927,1.210,-50.625,53.367,-0.117,-52.446,50.475,0.675,-49.869,48.009,-2.349,-49.455,45.781,-1.110,-50.665,42.594,-2.220,-47.652,40.805,-3.192,-49.275,37.557,-0.941,-47.194,35.561,-3.109,-48.344,32.724,-6.172,-46.420,34.083,-4.296,-43.142,34.272,-2.964,-43.542,30.819,-6.408,-44…	LDDWKYRRGTRIDICSILLCFLSKMLRLFSWFVVVLATIGLVSAQPLPYNNTFAKEMLHFSGAAYCPSTTIMDWSCSFCGEISNFLPVGTSVNTTTDLLAFVGYKNDTNSIIVAFRGTRLLSILDWLEDLDFFAKPGICEGCMVHEGFMKDYFSIRAETIRLVQLLTAKFPSAEIVIT
1DT3	MGYP001117399807	252	157	15	2	206	1	237	1	3.24e-06	185	269	311	VSQDL-FNQFNLFAQYSAAAYCGKNNDAPAGTNI-------TCTGNACP------------------------EVEKADATFLYSFEDSGVGDVTGFLALDNTN-KLIVLSFRGSRS---IENWIGN---LNFDLKEINDICSG-CRGHDGFTSSWRSVADTLRQKVEDAVRE-HPDYRVVFTGHSLGGALATVAGA------DLRGNGYDIDVFSYGAPRVGNRAFAEFLTVQTGGTLYRITHTNDIVPRL	MNKEIILNNYSIDFILSLYF---DNLQ--KNKNLQDIIDLKNLDFFTFNKKSDEEIEEIENNYKNIIDYSIKNDILKN-YYIDEIFE--FHNNSKCIIIKNNFIINKIYLFSITKHNHHFFKNMLLNKNRLKFLPVNLKCINKKDCKIYHGVYDEL--FKKHFFKNIKEYLLKLDNSISIQLIGKSINGMTNIVLGYLISMLLKNK-----INIYSYSICKFCNQDFIDEIEKKENIKLNIINHKYDAVQLL	8.396,-0.256,14.061,6.057,-3.025,15.243,6.553,-6.242,13.170,3.022,-7.330,13.969,1.499,-4.106,12.504,3.543,-4.609,9.285,2.527,-8.271,8.918,-1.105,-7.564,9.741,-1.368,-4.674,7.252,0.338,-6.670,4.508,-1.845,-9.741,5.152,-5.011,-7.641,4.879,-3.736,-5.971,1.640,-2.986,-9.387,0.186,-6.415,-10.902,1.174,-8.278,-7.886,-0.238,-6.299,-8.287,-3.505,-7.043,-12.049,-3.619,-10.826,-11.547,-3.033,-11.054,-8.377…	MNKEIILNNYSIDFILSLYFDNLQKNKNLQDIIDLKNLDFFTFNKKSDEEIEEIENNYKNIIDYSIKNDILKNYYIDEIFEFHNNSKCIIIKNNFIINKIYLFSITKHNHHFFKNMLLNKNRLKFLPVNLKCINKKDCKIYHGVYDELFKKHFFKNIKEYLLKLDNSISIQLIGKSINGMTNIVLGYLISMLLKNKINIYSYSICKFCNQDFIDEIEKKENIKLNIINHKYDAVQLLVKPFTLNFKNLIILNKDKLIIQNNIDENQDTIINKNFIYNIFSFSLKYHSSIHFFEDLLNYKNEDKSIKINVKK
1DT3	MGYP001118378851	246	158	13	10	227	4	230	1	0.0002769	118	269	255	FNLFAQYSAAAYCGK--------NNDAPAGTNI-----TCTGNACPEVEKADATFLYSFEDSGV-GDVTGFLALDNTNKLIVLSFRGSRS---------IENWIGNLNFDLKEINDICSGCRGHDGFTSSWRSVADTLRQKVEDAVREHPDYRVVFTGHSLGGALATVAGADLRGNGYDIDVFSYGAPRVGN---RAFAEFLTVQTGG--TLYRITHTNDIVPRLPPREFGYSHSSPEYWIKSGTL	AYELAFLSEYVYKSSGVQQTRTFNIGGDPNDTYFDRMQTQRGVATPRTKRGDWAIIAD---NGISNNFYASKFQNLHTGEFVISFRGTGSERSRTYTKGILDTIFQ------RLERITND---VSVDIQHLIFRASPYVDAAAKFIAKHKEDKLIITGHSLGGFLAYSMA---FYHPVKVV--AFNPPHVVNKPVEKIYELSKHKNYNSSKMHIFESSDDFVTMLT-RLFK-SMPKNIKYMHGQTG	-3.827,-1.330,15.648,-1.384,-2.317,12.794,1.743,-0.144,12.745,3.087,1.471,9.528,5.918,-1.115,9.698,3.460,-4.081,9.856,1.398,-2.655,6.947,4.621,-2.156,4.865,5.492,-5.786,5.572,2.022,-6.999,4.529,2.482,-4.847,1.326,5.770,-6.686,0.566,4.166,-10.066,1.389,1.583,-9.729,-1.376,4.482,-9.520,-3.978,5.683,-12.843,-2.788,2.382,-14.636,-2.356,1.532,-14.619,-5.879,-0.009,-17.950,-6.252,-0.068,-19.686,-3.123,…	MASAYELAFLSEYVYKSSGVQQTRTFNIGGDPNDTYFDRMQTQRGVATPRTKRGDWAIIADNGISNNFYASKFQNLHTGEFVISFRGTGSERSRTYTKGILDTIFQRLERITNDVSVDIQHLIFRASPYVDAAAKFIAKHKEDKLIITGHSLGGFLAYSMAFYHPVKVVAFNPPHVVNKPVEKIYELSKHKNYNSSKMHIFESSDDFVTMLTRLFKSMPKNIKYMHGQTGGHSIDGVIKYLKTSKTGASELKWDY
1DT3	MGYP001120024853	171	116	6	63	228	22	190	1	3.086e-10	330	269	207	VTGFLALDNTNKLIVLSFRGSRSIENWIGNLNFDLKEINDICSGCRGHDGFTSSWRSVADTLRQKVEDAVREHPDYRVVFTGHSLGGALATVAGADLR-GNGYDIDVFSYGAPRVG-NRAFAEFLTVQTGGTLYRITHTNDIVPRLPPREFGYSHSS-PEY--WIKSGTLV	VDYAVKVYDDEKRIRLLFQESDGNADWRNNLDFPIKPYKNQENTLWFAKGWALAYKSANEEIMYKVINAINYHPDYDVEVCGWSYGGAIALLAVEDLHYRTGIKSIVTTFGGPKPLFGKKTKDYILSCCKE-VNQYCHKNDIVPTLPPF-IGYEMAKKVSVGKWKPFGKLN	3.018,2.477,16.555,5.422,5.144,15.246,5.977,5.413,11.486,9.684,4.364,11.804,8.673,1.316,13.893,6.063,0.337,11.319,8.559,0.710,8.487,11.030,-1.596,10.303,8.216,-4.067,10.790,7.425,-4.078,7.082,11.121,-4.734,6.361,11.432,-7.566,8.878,8.210,-9.318,8.231,8.237,-12.880,6.937,6.047,-12.732,3.874,3.960,-15.318,2.097,5.153,-15.648,-1.564,2.173,-15.919,-4.067,4.288,-16.834,-7.111,3.094,-13.661,-8.915,5.11…	MKPDELFEEIKRTQYIKTGDSVDYAVKVYDDEKRIRLLFQESDGNADWRNNLDFPIKPYKNQENTLWFAKGWALAYKSANEEIMYKVINAINYHPDYDVEVCGWSYGGAIALLAVEDLHYRTGIKSIVTTFGGPKPLFGKKTKDYILSCCKEVNQYCHKNDIVPTLPPFIGYEMAKKVSVGKWKPFGKLNPWKWHTIYGDKTLYDKL
1DT3	MGYP001124782309	258	155	13	1	234	17	253	1	1.757e-10	307	269	267	EVSQDLFNQFNLFAQYSAAAY--CGK-----NNDAPAGTNITCTGNACPEVEKADATFLYSFEDSGVGDVTG--FLALDNTNKLIVLSFRGSRSIENWIGNLNFDLKEINDICSGCRGHDGFTSSWRSVADT---LRQKVEDAVREHPD--Y-RVVFTGHSLGGALATVAGADLRGN--GYDIDVFSYGAPRVGNRAFAEFLTVQTGGTLYRITHTNDIVPRLPPR---EF----GYSHSSPEYWIKSGTLVPVTRND	PENFDLNRAIEL-AELSNLAYAQYKAFTEKQSWQLPAP-----------------YSLELVLDAVYENDNTPLGFIAKA--NNDIYIVWRGTQDIEEWIEDAKYDQTPCSFLNKGEKVALGFDEMYTTGDSKVSSPQRKVLEYLNKIPLGSYTNLWITGHSLGGALAVLNTCDIVHNTAHHGAKMYNFAGPRAGDGNFANTFNNSVS-LSWRIVNSHDAVPNLPPEYCPPILHTYHYEHVNQAFPISFGNSWDLVKDH	-14.491,-1.057,-35.664,-14.156,-3.565,-33.088,-16.862,-2.829,-30.725,-15.566,-3.684,-27.530,-18.682,-4.080,-25.903,-17.865,-2.908,-22.671,-19.769,-5.118,-20.848,-20.136,-3.118,-17.961,-20.077,-5.667,-15.685,-22.247,-4.445,-13.333,-20.903,-6.280,-10.736,-24.185,-7.598,-10.136,-24.553,-7.838,-6.488,-22.245,-10.393,-6.231,-22.270,-11.773,-2.909,-19.233,-10.272,-1.294,-16.453,-12.840,-1.177,-16.143,-…	MVFYSRLVYMVAHTQLPENFDLNRAIELAELSNLAYAQYKAFTEKQSWQLPAPYSLELVLDAVYENDNTPLGFIAKANNDIYIVWRGTQDIEEWIEDAKYDQTPCSFLNKGEKVALGFDEMYTTGDSKVSSPQRKVLEYLNKIPLGSYTNLWITGHSLGGALAVLNTCDIVHNTAHHGAKMYNFAGPRAGDGNFANTFNNSVSLSWRIVNSHDAVPNLPPEYCPPILHTYHYEHVNQAFPISFGNSWDLVKDHSIDAYISTLKALLS
1DT3	MGYP001126286710	243	127	14	8	219	14	225	1	4.172e-10	283	269	297	NQFNLFAQYSAAAYCGKNNDAPAGTNITCTGNACPEVEK-------ADATFLYSFEDSGVGDVTGFLALDNTNKLIVLSFRGSRS------IENWI---GNLNFDLKE------INDICSGCRGHDGFTSSWRSVADTLRQKVEDAVREHPDYRVVFTGHSLGGALATVAGAD-----LRGNGYDIDVFSYGAPRVGNRAFAE-FLTVQTGGTLYRITHTNDIVPRLPPREF---GYSHSSPE	RNALLLAEACALAYLDE-----------------PEAAKGFREELGLEARLISADN------T--QVYVAQDDAVVLVAFRGSQCPNSLDGLKDWLLTNANNYLIVPEGRFGTEFAAAGVGARFHRGFIDALGEIWERLYGAVDEAIQKAP-RPLWITGHSLGGALALLAAWRFQRNFV--EVDEIV--TFGAPMIGNQAAADAFQKAFAA-KISRYVNLEDPVPLLPSVSLLANAYVHCPNE	-16.557,-2.158,21.129,-13.767,-1.739,18.559,-14.636,-2.672,15.008,-12.759,-5.802,14.012,-11.349,-6.929,10.649,-13.539,-9.676,9.153,-10.881,-12.086,7.859,-13.562,-14.025,5.898,-14.632,-10.962,3.857,-11.705,-10.362,1.486,-12.011,-7.190,-0.586,-14.952,-5.911,1.513,-15.457,-2.132,1.655,-15.808,-2.439,5.445,-12.366,-4.052,5.805,-11.039,-1.433,3.365,-12.298,1.303,5.750,-10.553,-0.327,8.777,-7.322,-0.63…	MPTRIDVSAHGSPRNALLLAEACALAYLDEPEAAKGFREELGLEARLISADNTQVYVAQDDAVVLVAFRGSQCPNSLDGLKDWLLTNANNYLIVPEGRFGTEFAAAGVGARFHRGFIDALGEIWERLYGAVDEAIQKAPRPLWITGHSLGGALALLAAWRFQRNFVEVDEIVTFGAPMIGNQAAADAFQKAFAAKISRYVNLEDPVPLLPSVSLLANAYVHCPNEVGLSAAQAAASALDAFKQKAGAAADGVMNASLIEDVWGAVQERISSHFIDHYLERVKSKIAELKDDEGAKPA
1DT3	MGYP001127030716	204	124	9	75	263	2	193	1	7.153e-09	289	269	205	LIVLSFRGSRSIENWIG----NLNFDLKEINDICSGCRGHD----GFTSSWRSVADTLRQKVEDAVREHPDYRVVFTGHSLGGALATVAGADL------RGNGYDIDVFSYGAPRVGNRAFAE-FLTVQTGGTLYRITHTNDIVPRLPPREFGYSHSSPEYWIKSGTLVPVTRNDIVKIEGIDATGGNNQPNIPDIPAHLWYFG	VIGLSFRGSSNVEQLIAEATDSAFEAKVPY---APGGQVSKYFGQAFDKLWGNGLQAAMQ---SQISAHGDYSVYVTGHSLGGSLAALAAGQIVYLNMKPASG--VYLYTFGEPRTGDQDFATAHDKQNMAAS-YRVTHMRDMVPHIPPEFMHYRHHATEVFYNDDMSANAK---FTVCAGEEDDKCSNSYLDFSIDDHLHYYG	-1.070,-11.705,19.699,-0.961,-11.049,16.004,-1.524,-12.619,12.583,1.106,-11.151,10.265,0.558,-10.756,6.503,3.599,-9.382,4.662,3.816,-8.665,0.935,7.045,-8.567,-1.029,7.907,-5.588,-3.320,9.252,-5.840,-6.835,12.691,-7.460,-7.369,13.258,-4.901,-10.108,11.948,-1.581,-8.819,13.662,0.430,-11.578,11.940,-1.553,-14.315,8.653,-1.169,-12.517,9.107,2.629,-12.272,10.041,2.821,-15.891,6.943,0.797,-16.767,4.836…	KVIGLSFRGSSNVEQLIAEATDSAFEAKVPYAPGGQVSKYFGQAFDKLWGNGLQAAMQSQISAHGDYSVYVTGHSLGGSLAALAAGQIVYLNMKPASGVYLYTFGEPRTGDQDFATAHDKQNMAASYRVTHMRDMVPHIPPEFMHYRHHATEVFYNDDMSANAKFTVCAGEEDDKCSNSYLDFSIDDHLHYYGHDVSGFGKNGCT
1DT3	MGYP001128633183	220	121	17	23	212	1	184	0.09	3.666	30	269	224	GKNNDAPAGTNITCTGNACPEVEKADATFLYSFEDSGVGDVTGFLALDNTNK----LIVLSFRGSRS-IENWIGN-----------LNFDLKEINDICSGCR-GHDGFTSSWRSVADTLRQKVEDAVREHPDY---RVVFTGHSLGGALATVAGADLRGNGYDI---DVFSYGAP----RVGNRAFAEFLTVQTGGTLYRITHTNDI---VPRLPPREFG	RQETVTPGSDSNTAT--------TGSS---RSVNFTTDDGVTLGGHVFGAGSSGVILAH----MYPADQTSWYPTAERLAQEGYLVLTFDFRGY-----GESEGSKQI--------ELIDKDVTAAIREIAGAGAGESALIGASMGGTACLMAA---AQSSPPIPIAGVATLSAPVEFKGLS---AAEAVPKLT-VPLLFIAAEGNVGADGAR-KLQELA	31.005,-41.988,-17.253,29.130,-38.756,-17.326,25.998,-38.966,-15.266,23.182,-36.782,-16.826,21.228,-35.275,-14.003,17.760,-34.741,-15.267,16.219,-31.691,-13.723,13.083,-32.659,-11.883,10.118,-30.639,-12.797,8.511,-30.209,-9.536,5.393,-28.603,-10.582,4.468,-27.168,-7.422,1.059,-26.359,-8.128,0.664,-23.813,-5.591,-2.838,-23.852,-4.763,-3.665,-20.600,-5.790,-5.246,-19.504,-2.684,-8.820,-18.863,-3.36…	RQETVTPGSDSNTATTGSSRSVNFTTDDGVTLGGHVFGAGSSGVILAHMYPADQTSWYPTAERLAQEGYLVLTFDFRGYGESEGSKQIELIDKDVTAAIREIAGAGAGESALIGASMGGTACLMAAAQSSPPIPIAGVATLSAPVEFKGLSAAEAVPKLTVPLLFIAAEGNVGADGARKLQELASNKGDLKLFPGDEHGTNLLEGPYAEQVWDLLSGFLKQLMP
1DT3	MGYP001136503477	251	172	11	2	228	1	244	1	4.083e-13	346	269	261	VSQDLFNQ------FNLFAQYSAAAYCGKNNDAPAGTNITCTGNACPEV-----EKAD----ATFLYSFEDSGVGDVTGFLALDNTNKLIVLSFRGSRSIENWIGNLNFDLKEINDICS-GCRGHDGFTSSWRSVADTLRQKVEDAVR--EHPDYRVVFTGHSLGGALATVAGADLR--GNGYDIDVFSYGAPRVGNRAFAEFLTVQTGGTLYRITHTNDIVPRLPPREFGYSHSS----PEYWIKSGTLV	MDIENINKNISIIDYN--TTLNLLLYSIIIYKLNNDEINIYNKNILKNHFINLQYKSIYTINDELLKIFY-CEITNILCMIIRNNKEKIIKIIFRGTKNTKNLYYNLNIQLKPIKFLDNINIKIHEGFYNHF--FENNFYNKIKNFLQKIDCKNYLFQLSGHSLGANLSILCGYFLSYIFYQNKILIVSFGSSKIGNEHFKQSFDNKDNILCYRFINQSDYINNLPP--IHYYHIGIPIKLKSTKNNLNLI	1.728,-26.416,6.927,-0.053,-27.832,3.989,0.216,-25.098,1.404,-2.604,-26.529,-0.410,-4.674,-25.612,2.386,-3.731,-22.201,2.555,-4.611,-21.770,-0.792,-7.885,-23.115,-0.479,-8.570,-20.580,1.812,-7.477,-17.805,0.154,-10.417,-16.647,-1.255,-9.944,-14.655,-4.119,-9.728,-11.211,-3.016,-13.270,-10.003,-3.215,-14.438,-7.101,-5.382,-15.832,-5.079,-2.450,-12.580,-5.327,-0.352,-10.524,-4.341,-3.443,-12.772,-1…	MDIENINKNISIIDYNTTLNLLLYSIIIYKLNNDEINIYNKNILKNHFINLQYKSIYTINDELLKIFYCEITNILCMIIRNNKEKIIKIIFRGTKNTKNLYYNLNIQLKPIKFLDNINIKIHEGFYNHFFENNFYNKIKNFLQKIDCKNYLFQLSGHSLGANLSILCGYFLSYIFYQNKILIVSFGSSKIGNEHFKQSFDNKDNILCYRFINQSDYINNLPPIHYYHIGIPIKLKSTKNNLNLIECHSYNHYLNNLLNSKW
1DT3	MGYP001136512481	237	131	16	3	222	1	204	1	3.602e-11	327	269	238	SQDLFNQFNLFAQYSAAAYCGKNNDAPAGTNITCTGNACPEVEKADATFLYSFEDSGVGDVTGFLALDNTNKLIVLSFRGS--RSIENWIGN----LNFDLKE----INDICS--GC-RGHDGFTSSWRSVA--DTLRQKVEDAVREHPDYRVVFTGHSLGGALATVAGADLRGNG--YDIDVFSYGAPRVGNRAFAEFLTVQTGGTLYRITHTNDIVPRLPPREFGYSHSSPEYWI	MTGLAPRLHSFAQIAKAAY-QE--DA----------APFHSLG-----LERARLVSRQ-GAQCWVLEN--STQLVFAFRGTEFDQSSDIKASLKIALRPAMTRRHEGNAAARAAYACGRVHRGFARELSKIHHSETLK------LPPENARQVYFCGHSMGGAMALLAAGRWRINYQPEA--VISFGAPCLGDAAFVSGLPV----RHWRVVHGADCVPHLPFWLLGYRHHSAAIHI	-14.782,-11.870,7.363,-13.258,-15.214,7.891,-10.612,-15.768,5.344,-7.575,-14.226,3.703,-9.062,-14.069,0.190,-12.311,-12.135,1.080,-10.116,-9.764,3.130,-7.708,-9.204,0.209,-10.673,-8.464,-2.113,-12.136,-5.917,0.391,-8.736,-4.144,0.712,-8.387,-4.131,-3.123,-11.717,-2.206,-3.206,-10.330,0.208,-0.543,-7.038,0.617,-2.512,-9.071,1.329,-5.651,-11.342,3.849,-3.807,-8.193,5.701,-2.551,-7.876,7.170,-6.084,…	MTGLAPRLHSFAQIAKAAYQEDAAPFHSLGLERARLVSRQGAQCWVLENSTQLVFAFRGTEFDQSSDIKASLKIALRPAMTRRHEGNAAARAAYACGRVHRGFARELSKIHHSETLKLPPENARQVYFCGHSMGGAMALLAAGRWRINYQPEAVISFGAPCLGDAAFVSGLPVRHWRVVHGADCVPHLPFWLLGYRHHSAAIHIGQNGWPRGMFGDHRTKSYSAALAKYLENGAAGEN
1DT3	MGYP001137321479	231	127	10	10	222	15	217	1	2.022e-11	335	269	252	FNLFAQYSAAAYCGKNNDAPAGTNITCTGNA----CPEVEKADATFLYSFEDSGV--GDVTGFLALDNTNKLIVLSFRGSRSIENWIGNLNFDLKEINDICSGCRGHDGFTSSWRSVADTLRQKVEDAVREHPDY--RVVFTGHSLGGALATVAGADLRGNGY----------DIDVFSYGAPRVGNRAFAEFLTVQTGGTLYRITHTNDIVPRLPPREFGYSHSSPEYWI	ALALARASQLSYSN--------------EPAIKAGIAEIVGEPLREFKYFD---VPPTNT--EAFLAATDSAIVLAFRGSQTVQDWLQDGQIALVPF---RRGGLIHIGFRNAVDSV----YPLIESTLNDWAGKGRTLWITGHSLGGALAMLTAAYLRFPADPTKSLPRPFAGLY--TFGQPRVGTVPFCDACNADFGQTYFRYVDFEDIVTRVPPRELGYWHTGRDEYM	-1.136,-10.441,17.294,-4.383,-9.815,15.597,-5.466,-6.579,13.905,-7.033,-4.040,16.299,-9.933,-2.624,14.372,-10.801,-0.115,17.156,-7.890,2.275,16.465,-7.038,4.282,13.410,-3.942,5.531,15.248,-0.522,4.134,14.795,-0.198,0.725,16.494,2.722,-1.700,16.491,0.115,-4.482,16.625,-1.674,-3.151,13.431,1.734,-2.578,11.777,2.765,-6.229,12.415,-0.656,-7.612,11.341,-0.644,-5.575,8.104,3.084,-6.467,7.420,2.068,-10.…	MPLDPATSKHSIQNALALARASQLSYSNEPAIKAGIAEIVGEPLREFKYFDVPPTNTEAFLAATDSAIVLAFRGSQTVQDWLQDGQIALVPFRRGGLIHIGFRNAVDSVYPLIESTLNDWAGKGRTLWITGHSLGGALAMLTAAYLRFPADPTKSLPRPFAGLYTFGQPRVGTVPFCDACNADFGQTYFRYVDFEDIVTRVPPRELGYWHTGRDEYMDGNGKIHEDPVWWQIFLDRISVGIEKLRQMQIGAI
1DT3	MGYP001137380361	221	133	7	63	267	4	217	1	2.58e-14	467	269	222	VTGFLALDNTNK----LIVLSFRGSRSIENWIGNLNFDLK---EINDICSGCRGHDGFTSSWRSVADTLRQKVEDAVREHPDYRVVFTGHSLGGALATVAGADLR---GNGYDIDVFSYGAPRVGNRAFAEFLT----VQTGGTLYRITHTNDIVPRLPPREFGYSHSSPEYWIKSGTLVPVTRNDIVK--IEGIDATGGNNQPNIPDIPAHLWYFGLIGT	TVGFVGIWRENEQSEPQIVVAFRGSVSLTNWYENLQIIKEPTPWPVNGDNDCKVHEGFLASYMDVQRTVRDAVTQLMDDIPQPRIIITGHSLGGAISQICAADLKSYLGHDANIELVTFHAPRVGNINFSQAMHQLFPVNPHSTTKRFTNRADPMSHLPPYLLSYVHLAGETWV---TL----DNRTMVCNPEDFEDPNCQNSVWPDDISNHFYIWNVFFG	13.154,-15.308,-4.061,11.997,-12.229,-2.778,12.892,-11.534,0.712,9.393,-10.349,1.358,8.651,-10.276,5.067,5.176,-9.770,6.483,3.273,-10.177,9.755,-0.372,-11.151,10.271,-1.726,-10.905,13.815,-4.423,-9.681,16.162,-4.170,-6.153,17.636,-6.234,-4.543,20.458,-5.963,-1.051,21.755,-6.852,-2.390,25.152,-8.563,-5.496,26.709,-12.046,-4.059,26.014,-11.453,-2.920,22.410,-12.691,-4.972,19.541,-9.953,-7.148,18.02…	QTDTVGFVGIWRENEQSEPQIVVAFRGSVSLTNWYENLQIIKEPTPWPVNGDNDCKVHEGFLASYMDVQRTVRDAVTQLMDDIPQPRIIITGHSLGGAISQICAADLKSYLGHDANIELVTFHAPRVGNINFSQAMHQLFPVNPHSTTKRFTNRADPMSHLPPYLLSYVHLAGETWVTLDNRTMVCNPEDFEDPNCQNSVWPDDISNHFYIWNVFFGTDCSI
1DT3	MGYP001140120329	218	126	10	1	207	7	195	1	5.252e-09	282	269	198	EVSQDLFNQFNLFAQYSAAAYC-----GKNNDAPAGTNITCTGNACPEVEKADATFLYSFEDSGVGD---VTGFLALDNTNKLIVLSFRGSRSIENWIGNLNFDLKEINDICSGCRGHDGFTSSWRSVADTLRQKVEDAVREHPDYRVVFTGHSLGGALATVAGADLR--GNGYDIDVFSYGAPRVGNRAFA-EFLTVQTGGTLYRITHTNDIVPRLP	NYDEEL---TKTAVNISQASYCVSKTNVWN---------------CATCDKN-----NIYENSSLINGEFAI--YGYNNLYDSIFVGFRGSSNLENWVTNIHFSIIYPY--GNDIGIEKGFYTLFDSFKNEAYININLLSNKYKTNNIIITGHSLGGAISTLLNFDILYNNLPYKTNLITFGSPRVGNQNFVNEFNKYNTYSKR--ITHYFDMVPHVP	21.687,1.608,17.148,18.679,0.109,18.136,16.257,2.433,16.530,13.761,2.869,19.021,10.922,1.922,17.234,8.815,4.080,19.281,5.357,3.294,18.391,5.597,-0.071,16.938,2.123,-1.644,17.266,2.857,-5.426,17.108,-0.914,-6.475,16.950,-1.657,-3.932,14.157,1.444,-5.263,12.289,0.246,-8.900,12.727,-3.155,-7.809,11.412,-1.519,-6.034,8.398,0.579,-9.215,7.604,-2.554,-11.306,7.696,-4.423,-8.902,5.371,-1.385,-8.831,3.03…	EIINCQNYDEELTKTAVNISQASYCVSKTNVWNCATCDKNNIYENSSLINGEFAIYGYNNLYDSIFVGFRGSSNLENWVTNIHFSIIYPYGNDIGIEKGFYTLFDSFKNEAYININLLSNKYKTNNIIITGHSLGGAISTLLNFDILYNNLPYKTNLITFGSPRVGNQNFVNEFNKYNTYSKRITHYFDMVPHVPQEF
1DT3	MGYP001140456828	218	142	8	27	225	15	228	1	2.114e-10	302	269	228	DAPAGTNITCT------------GNACPEVEKADATFLYSFEDSGVGDVTGFLALDNTNKLIVLSF--RGSRSIENWIGNLNFDLKEINDICSGCRGHDGFTSSWRSVADTLRQKVEDAVREHPDYRVVFTGHSLGGALATVAGADLR-GNGYD---IDVFSYGAPRVGNRAFA-EFLTVQTGGTLYRITHTNDIVPRLPPREFGYSHSSPEYWIKSG	AAVAASSIEFELSLAKTLFPLAAGAECFQGRGYKVVKKISVNVSQLESVTAIIGVNDDTKSIAVSFTGNRTDNIENVFSEASSSQKAF-AL-TGGDVFASYMDAFWEMWREFSPSFIALIDTKKGYTVHVTGYSFGGAIASVVAAHMSASNFVDKDALLLYTFGQPKVGDAEFATEFKRRVPHS--WRVVHDEDIVPTLPPNSLGYTHFWGEVFFKAE	-4.377,-41.375,55.973,-3.181,-38.630,53.716,-5.792,-37.989,50.984,-4.060,-37.054,47.697,-5.525,-34.043,46.102,-7.453,-34.815,43.048,-6.063,-32.952,40.217,-8.814,-31.637,38.134,-7.700,-31.180,34.714,-9.606,-28.354,33.095,-9.472,-28.732,29.372,-9.819,-25.307,27.979,-11.046,-25.831,24.596,-9.881,-22.810,22.755,-12.080,-22.646,19.773,-9.990,-21.162,17.030,-12.265,-18.855,15.244,-11.045,-18.958,11.767…	HVSSPTMVWLLLCVAAVAASSIEFELSLAKTLFPLAAGAECFQGRGYKVVKKISVNVSQLESVTAIIGVNDDTKSIAVSFTGNRTDNIENVFSEASSSQKAFALTGGDVFASYMDAFWEMWREFSPSFIALIDTKKGYTVHVTGYSFGGAIASVVAAHMSASNFVDKDALLLYTFGQPKVGDAEFATEFKRRVPHSWRVVHDEDIVPTLPPNSLGYTHFWGEVFFKAE
1DT3	MGYP001141488382	217	150	11	63	266	9	217	1	4.908e-13	404	269	227	VTGFLALDNTNKLIVLSFRGS-RSIENWIGN---LNFDLKEINDICSGCRGHDGFTSSW-RSVADTLRQKVEDAVREHPDYRVVFTGHSLGGALA----TVAGADLRGNGYDIDVFSYGAPRVGNRAFAEFLTVQTGG-TLYRITHTNDIVPRLP-PREFGYSHSSPEYWIKS-GTLVPVTRNDIVKIEGIDATGGNN-QPNIPDIPAHLWYFGLIG	CSGFTAVSHSDQAVIVAYRGTNKNTQLIMEGDETMFKNHTPWVA---GGKVSKYFDDGFTRLWNQGMKNDFTSLVNANPTYKVWVTGHSLGGALAVLGASYITHNKLVAADKVFLYTFGEPRVGDGDFAAA--VDKEMKQAYRVVHDRDLVAHIPLKNEEGYRQHKTEIYYKKKDMGPGAE---YKVCLEDESMLCSDGNIVDFSIADHLHYFDVEV	1.580,-10.038,-8.731,3.068,-10.634,-11.942,0.431,-9.121,-13.994,2.387,-9.488,-17.131,3.646,-12.953,-17.227,1.521,-15.284,-15.548,-1.011,-13.265,-14.097,-0.503,-14.519,-10.758,-1.348,-12.291,-7.985,-1.359,-13.381,-4.401,-2.830,-12.166,-1.178,-4.318,-13.515,1.985,-6.822,-12.704,4.713,-6.190,-13.772,8.276,-7.364,-13.076,11.874,-5.121,-12.122,14.780,-7.140,-12.874,17.980,-4.419,-11.382,20.265,-4.529,…	CDVTMLDKCSGFTAVSHSDQAVIVAYRGTNKNTQLIMEGDETMFKNHTPWVAGGKVSKYFDDGFTRLWNQGMKNDFTSLVNANPTYKVWVTGHSLGGALAVLGASYITHNKLVAADKVFLYTFGEPRVGDGDFAAAVDKEMKQAYRVVHDRDLVAHIPLKNEEGYRQHKTEIYYKKKDMGPGAEYKVCLEDESMLCSDGNIVDFSIADHLHYFDVEVDDFGAAGCKH
1DT3	MGYP001141672596	174	107	6	77	243	11	174	1	3.922e-10	313	269	174	VLSFRGSRSIENWIGNLNFDLK--EINDICSGCRGHDGFTSSWRSVADTLRQKVEDAVREHPDYRVVFTGHSLGGALATVA-GADLRGNGYDI-DVFSYGAPRVGNRAFAEFLTVQTGGTLYRITHTNDIVPRLPPREFGYSHSSPEYWI---KSGTLVPVTRNDIVKIEGIDA	FVAYRGSENIVNWINNMKMTFVYPYDIEIYKDIGIQKGFYTTYSNVYDEVMDAVSSASKKYDVNDVILSGHSLGSISSILALDIHIYKPSLNVISVATFGSPRFGNDAFNDML-AKLNMSIYRITHNNDIVPHVLPYIFGYRHSINQLWFNNDNSA---------YIICNGVED	-0.036,-11.728,8.930,-0.192,-11.626,12.732,-2.575,-10.861,15.560,-1.933,-8.172,18.160,-3.806,-9.037,21.334,-3.234,-5.551,22.892,-5.053,-3.709,20.021,-7.385,-6.588,19.034,-6.318,-6.198,15.410,-4.873,-8.215,12.572,-1.501,-6.956,11.321,-0.277,-7.473,7.768,3.307,-6.447,6.989,4.840,-6.563,3.492,8.542,-6.695,2.996,10.254,-4.653,0.209,12.562,-6.091,-2.472,15.937,-7.616,-1.452,17.416,-6.083,-4.517,15.834…	VGFNSLYKSIFVAYRGSENIVNWINNMKMTFVYPYDIEIYKDIGIQKGFYTTYSNVYDEVMDAVSSASKKYDVNDVILSGHSLGSISSILALDIHIYKPSLNVISVATFGSPRFGNDAFNDMLAKLNMSIYRITHNNDIVPHVLPYIFGYRHSINQLWFNNDNSAYIICNGVED
1DT3	MGYP001142781623	263	158	13	1	228	1	240	1	1.266e-09	289	269	266	EVSQDLFNQFNLFAQYSAAAYCGKNNDAPAGTNITCTGNACPEVEKADATFLYSFEDSGVG-----------------------DVT-GFLALDNTNKLIVLSFRGSRSIENWIGNLNFDLKE---INDICSGCRGHDGFTSSWRSVADTLRQKVEDAVREHPDYRVVFTGHSLGGALATVAGADLRGNGY---DIDVFSYGAPRVGNRAFA--EFLTVQTGGTLYRITHTNDIVPRLPPR--EFGYSHSSPEYWIK-SGTLV	MSFDPQFARDTVLPLVQAAYQVFRNPDV----DPTLPGG---------YQKTALLE--ADPTLLDLITDLSENARSFVQAVAGTTTVFSLVGKNTATKTAFVAIRGTQTQTEWLQNLDIDTTGYRPVPDF---GDVHMGWMGLYETMRANVAANLPAACAGCD--QLIVTGHSLGAALAVLAAPDIAKNISVVPEPKLTTFGGPRPGLHDFVVPFNLLID---SCFRVVNLFDIVPHLPLALPGLPYEHVGMQIGVNSGGSID	2.563,-10.058,15.541,1.787,-13.275,13.739,-0.090,-13.025,10.406,-3.839,-13.629,10.969,-5.458,-14.747,7.623,-8.981,-14.291,9.119,-8.251,-10.666,10.170,-6.651,-10.021,6.795,-9.755,-11.368,4.929,-12.506,-9.984,7.155,-11.034,-6.591,8.154,-7.972,-5.449,6.112,-9.176,-6.508,2.635,-12.603,-4.818,3.180,-10.737,-1.598,4.160,-8.901,-1.786,0.807,-12.218,-2.413,-0.976,-13.622,0.677,0.782,-10.711,2.776,-0.705,…	MSFDPQFARDTVLPLVQAAYQVFRNPDVDPTLPGGYQKTALLEADPTLLDLITDLSENARSFVQAVAGTTTVFSLVGKNTATKTAFVAIRGTQTQTEWLQNLDIDTTGYRPVPDFGDVHMGWMGLYETMRANVAANLPAACAGCDQLIVTGHSLGAALAVLAAPDIAKNISVVPEPKLTTFGGPRPGLHDFVVPFNLLIDSCFRVVNLFDIVPHLPLALPGLPYEHVGMQIGVNSGGSIDQTHRHSLDAYRAGLTSLISTQPAWAA
1DT3	MGYP001143044467	237	134	11	10	233	15	217	1	1.232e-12	364	269	265	FNLFAQYSAAAYCGKNNDAPAGTNITCTGNACP---EVEKAD-ATFLYSFEDSGVGDVTGFLALDNTNKLIVLSFRGSR--SIENWIGNLNFDLKEINDICSGCRGHDGFTSSWRSVADTLRQKVEDAVRE--HPDYRVVFTGHSLGGALATVAG-----ADLRGNGYDIDVFSYGAPRVGNRAFAEFLTVQTGGTLYRITHTNDIVPRLPPREFGYSHSSPEYWIKSGTLVPVTRN	ANSLAKAANLVYAD--------------WDSVDTEVKVASYKKFKYF------DKAGTQAFVAAN--DKNIIVSFRGTEADKMEDIITDLKVTFTETKF----GKVHTGFYEAVKLVIDDVC----AYVKEVRSKNQNLWVTGHSLGAALATLGTAFLQDAKLHVNG----LYTFGQPRVGDDDFAAKFNMRFKSRTFRVVNNCDIVTRVPMRSIGYSHIGTHIYLDSDAQLHLDQE	-2.308,8.397,13.383,-5.423,10.365,12.763,-9.011,9.227,13.048,-9.890,6.905,10.162,-13.296,7.607,8.514,-15.783,4.816,7.781,-17.048,6.581,4.685,-17.103,4.787,1.350,-14.657,5.788,-1.409,-11.367,7.676,-1.222,-10.967,9.738,2.033,-8.005,12.110,2.287,-8.094,11.635,6.139,-7.779,7.848,5.652,-5.020,8.333,3.056,-3.043,10.578,5.459,-3.522,8.178,8.473,-2.632,5.068,6.477,0.391,6.870,4.921,1.605,7.444,8.561,1.12…	MDKISNAYGFQLTNANSLAKAANLVYADWDSVDTEVKVASYKKFKYFDKAGTQAFVAANDKNIIVSFRGTEADKMEDIITDLKVTFTETKFGKVHTGFYEAVKLVIDDVCAYVKEVRSKNQNLWVTGHSLGAALATLGTAFLQDAKLHVNGLYTFGQPRVGDDDFAAKFNMRFKSRTFRVVNNCDIVTRVPMRSIGYSHIGTHIYLDSDAQLHLDQELSWWFGFTDRIKGRIETFKDKGIDDVADHSMELYQKILNKNLQSQPVA
1DT3	MGYP001147168353	281	166	19	1	264	16	269	1	3.168e-12	388	269	305	EVSQDLFNQFNLFAQYSAAAYCG--KNNDAPAGTNITCTGNACPEVEKADATFLYSFEDSGVGDVTGFLALDNTNKLIVLSFRGSRSIENWIGNLNFDLK--EINDICSGCRGHDGFTSSWRSVADTLRQKVEDAVREHPDY-RVVFTGHSLGGALATVAGADLR--GNGYDIDVFSYGAPRVGNRAFAEFLTVQTGGTLYRITHTNDIVPRLPPRE-FGYSHSSPEYWIKSGTLVPVTRNDIVK---IEG-IDATGGNNQPNIP-----DIPAHLWYFGL	QAWDSTDAQ--IAVRLSWAAYCPITQVNAWTCY---GCTQSATPA-----LSVVGVTV-DGPTNTMGYVGYY--DRTIVVVYRGTTNFQNLLVDLDFGKSTAWSDQ--SDVQVHSGFLKSHRNLWPGVQGNLNKAKSRCPNCNRVLFTGHSLGAAITTLASVELARNPIGLSIQSLSLGSPRVGNQKFVDYASRMVP-NAIRWVHTTDPVAHVPPRTVFKYAHRAREVW-QSTETS------YRLCSQTNGEDS--SCSD--SVPFYDLTDVDTHTVYGGV	-24.477,-35.398,-14.436,-25.698,-31.894,-14.900,-23.177,-29.280,-13.727,-25.025,-26.437,-12.351,-23.096,-23.433,-13.196,-24.158,-20.946,-10.659,-23.736,-17.691,-12.259,-22.743,-15.536,-9.517,-24.167,-12.227,-10.404,-21.496,-10.002,-9.275,-23.387,-6.921,-8.466,-21.289,-4.010,-9.325,-20.293,-2.980,-5.943,-20.250,0.671,-6.270,-16.887,1.913,-5.665,-16.640,3.473,-2.271,-16.231,7.200,-2.134,-13.126,8.6…	LLALTAACVLGSASAQAWDSTDAQIAVRLSWAAYCPITQVNAWTCYGCTQSATPALSVVGVTVDGPTNTMGYVGYYDRTIVVVYRGTTNFQNLLVDLDFGKSTAWSDQSDVQVHSGFLKSHRNLWPGVQGNLNKAKSRCPNCNRVLFTGHSLGAAITTLASVELARNPIGLSIQSLSLGSPRVGNQKFVDYASRMVPNAIRWVHTTDPVAHVPPRTVFKYAHRAREVWQSTETSYRLCSQTNGEDSSCSDSVPFYDLTDVDTHTVYGGVDLHSGACNGAKRSQTDSATLTKLLELANADAFAKFN
1DT3	MGYP001152841502	199	111	10	2	182	24	196	1	2.982e-07	210	269	197	VSQDLFNQFNLFAQYSAAAYCGKNNDAPAGTNITCTGNACPEVE------KADATFLYSFE-DSGVGDVT--GFLALDNTNKLIVLSFRGSRS-----IENWIGNLNFDLKEINDICSGCRGHDGFTSSWRSVADTLRQKVEDAVREHPDYRVVFTGHSLGGALATVAGADLRGNGYD----IDVFSYGAPRVGNRAFA	YQEPL--AFQLFHLASAAY-----------------GNHYDECVQKAYPPQEQRYIFSSAKQQCDIIDSSCESFIVNSNVTQITVIVFRGTKGKKQLIVEGWDSY--SDGVDFYGL---GKVNRYFHRAHNHMWPAVKEFLEN--PDFRSHRVIFTGHSLGGALASLAAARTVAQGFRTAQQVQLYTFGQPRTGGYDYA	10.534,-18.145,42.798,7.146,-18.987,41.606,5.703,-15.681,42.012,7.835,-14.020,39.465,6.844,-16.289,36.853,3.324,-15.454,37.092,3.834,-11.826,36.544,5.468,-12.416,33.287,2.833,-14.454,31.837,0.268,-11.825,32.530,2.105,-9.177,30.652,2.465,-11.188,27.610,-1.101,-12.093,27.692,-2.179,-8.509,28.014,-0.074,-7.618,25.184,-1.498,-10.270,23.224,-4.921,-9.237,24.133,-4.275,-5.796,23.178,-3.300,-6.767,19.95…	LCSSLLVTLSAAQRQFQQVRQTGYQEPLAFQLFHLASAAYGNHYDECVQKAYPPQEQRYIFSSAKQQCDIIDSSCESFIVNSNVTQITVIVFRGTKGKKQLIVEGWDSYSDGVDFYGLGKVNRYFHRAHNHMWPAVKEFLENPDFRSHRVIFTGHSLGGALASLAAARTVAQGFRTAQQVQLYTFGQPRTGGYDYAM
1DT3	MGYP001154580194	241	133	15	3	226	1	187	1	8.719e-06	172	269	245	SQDLFNQFNLFAQYSAAAYCGKNNDAPAGTNI-------TCTGNACPEVEKAD----ATFLYSFEDSGVGDVTGFLALDNTNKLIVLSFRGSRSIENWIGNLNF--DLKEINDICSGCRGHDGFTSSWRSVADTLRQKVEDAVREHPDYRVVFTGHSLGGALATVAGADLRGNG---YDIDVFSYGAPRVGNRAFAEFLTVQTGGT-LYRITHTNDIVPRLPPREFGYSHSSPEYWIKSGT	MNKIF----ILDLYKNALLTKLSNKVP---SIFLKEIEKN---DYLQDIHHIIANNKIHYICEGN------SSCFLLKH--KNTIFICP-NSKI------NLQINDKLIFIN---ESVKVHKGLFTEYEKIKTGIIKHINKLSENNDIVHIYISGHSIGAGLASLIAYDIIQKFKYYYNISCFLYDSPKVGNSEFYKQLKI--GVNCIY------------------------DMILKNEK	-3.612,-20.046,5.574,-4.990,-18.085,8.427,-8.469,-16.968,7.533,-7.727,-13.597,9.233,-4.775,-13.068,6.940,-6.784,-13.752,3.744,-9.409,-11.333,5.045,-6.751,-8.602,5.527,-5.451,-9.171,2.016,-8.995,-8.999,0.616,-9.861,-5.788,2.600,-6.615,-4.059,1.459,-7.385,-5.083,-2.176,-10.904,-3.545,-1.859,-9.429,-0.358,-0.358,-6.807,-0.289,-3.145,-9.518,-0.564,-5.788,-11.616,2.121,-4.109,-8.614,4.501,-3.935,-9.09…	MNKIFILDLYKNALLTKLSNKVPSIFLKEIEKNDYLQDIHHIIANNKIHYICEGNSSCFLLKHKNTIFICPNSKINLQINDKLIFINESVKVHKGLFTEYEKIKTGIIKHINKLSENNDIVHIYISGHSIGAGLASLIAYDIIQKFKYYYNISCFLYDSPKVGNSEFYKQLKIGVNCIYDMILKNEKQFDKILIEEDNISYIAGTKYFNHLKFFKNMFYNFEFNPNDIDMFISRLKNILQLSNKV
1DT3	MGYP001156457063	181	106	10	1	171	25	190	1	2.42e-07	248	269	192	EVSQDLFNQFNLFAQYSAAAYCG--KNNDAPAGTNITCTGNACPEVEKADATFLYSFEDSGV--GDVTGFLALDNTNKLIVLSFRGSRS--IENWIGNL-NFDLKEINDICSGCRGHDGFTSSWRSVADTLRQKVEDAVREHPDYRVVFTGHSLGGALATVAGADLRGNGYD---IDVFSY	QWSTTV---GETYLYHAYAAYCPEEQ------LANWDCTWCQEPGVS--DFTPSYF---SYDLKTDGFGYVGYSKADKAIVVSFRGTEADKIRDWIVDLRSIKQVPYKN-VTNVMVAKGFYNSWNSLSNNILRGVASLNATYPDYNIWVTGHSLGAALSTLCALELAELGYSSDRIQVYNF	28.800,29.204,-8.316,25.589,29.385,-6.490,25.050,26.214,-4.624,21.792,27.691,-3.388,19.554,25.960,-1.052,18.116,22.720,-1.543,15.228,23.272,0.707,13.965,19.991,1.679,10.463,20.418,1.383,9.180,17.906,3.640,5.781,18.358,2.739,4.027,17.129,5.688,0.951,16.659,3.995,-1.218,17.248,6.800,-4.244,15.594,5.689,-7.020,17.919,6.144,-8.970,16.018,8.434,-12.156,16.747,7.144,-14.181,17.044,10.126,-14.945,13.709…	GNATRALAFLLLALVAVSKGDSNWQWSTTVGETYLYHAYAAYCPEEQLANWDCTWCQEPGVSDFTPSYFSYDLKTDGFGYVGYSKADKAIVVSFRGTEADKIRDWIVDLRSIKQVPYKNVTNVMVAKGFYNSWNSLSNNILRGVASLNATYPDYNIWVTGHSLGAALSTLCALELAELGYSSDRIQVYNFGS
1DT3	MGYP001156641705	187	122	5	65	231	45	230	1	3.83e-11	352	269	272	GFLALDNTNKLIVLSFRGSR--------------SIENWIGNLNFDLKEINDICSGCRGHDGFTSSWRSVADTLRQKVEDAVREHPDYRVVFTGHSLGGALATVAGADLRGNGYDI-DVFSYGAPRVGNRAFAEFLTVQTGGTLYRITHTNDIVPRLPPRE----FGYSHSSPEYWI-KSGTLVPVT	SAVLVLEFADRRIVVFPGTQSEWGLLRNPTTTWESIRDWVRNLEVHLTSGAEFSLPGRLHRGFADELRRVLPDLIQDLTLRRNLNGEKPLTITGHSQGGAIAAIAAAVLPLNGFPVSEAYTFAAPHPGDYGFSQFVKA-SDVSVWRCEYGNDMVPHLPIRKGQNLLDFHAVGTLVYGRQNCATIIVT	6.644,-6.923,10.465,4.450,-10.045,10.623,5.767,-12.211,7.755,2.546,-14.247,7.311,0.406,-11.026,7.174,2.944,-9.526,4.660,2.504,-12.647,2.460,-1.288,-12.484,2.832,-1.161,-8.756,1.837,1.079,-9.525,-1.189,-1.499,-12.269,-2.302,-4.338,-9.827,-1.624,-2.688,-7.286,-3.995,-2.381,-10.005,-6.749,-6.047,-11.050,-6.121,-7.139,-7.336,-6.245,-5.785,-7.102,-9.784,-7.474,-10.383,-10.826,-10.772,-8.962,-9.479,-10…	MNRDIAKLCCRACSYGYDRMVETPALRGSHPLGAIDENLIEVGTSAVLVLEFADRRIVVFPGTQSEWGLLRNPTTTWESIRDWVRNLEVHLTSGAEFSLPGRLHRGFADELRRVLPDLIQDLTLRRNLNGEKPLTITGHSQGGAIAAIAAAVLPLNGFPVSEAYTFAAPHPGDYGFSQFVKASDVSVWRCEYGNDMVPHLPIRKGQNLLDFHAVGTLVYGRQNCATIIVTDSEILTNEMRRKRMLENHHDWIAHHHLDPNYFALLEKLPCDS
1DT3	MGYP001158351735	147	109	6	71	211	2	144	1	3.389e-05	175	269	168	NTNKLIVLSFRGSRSIENWI--GNLNFDLKEINDICSGCRGHDGFTSS--WRSVADTLRQKVEDAVREHPDYRVVFTGHSLGGALATVAGADLR--GNGYDIDVFSYGAPRVGNRAFAEFLTVQTGGTLYRITHTNDIVPRLPPREF	PVKMEVIVAIRGTKSLDDMYVDGHADEGFFEGSN-GKTYRCHSGMLNCALWMAKVGKLEHWLNKL--HSLGYKITLTGHSLGAGVATLLGCLLKTSNPNMHVDVYGYAVPACVGHDLSHECK-GSLIRVHSLVNRDDFVSRATAPNI	0.650,-6.208,22.811,-1.787,-7.742,25.283,-1.740,-4.694,27.664,-2.856,-2.361,24.966,-4.996,-4.934,23.192,-3.158,-4.072,19.986,-1.892,-6.143,17.045,0.730,-4.783,14.711,1.289,-6.362,11.251,4.606,-5.179,9.796,4.960,-5.695,5.994,8.403,-5.686,4.545,9.271,-3.626,1.399,11.441,-4.756,-1.499,14.686,-6.555,-0.466,16.552,-6.316,-3.683,16.842,-4.074,-6.669,15.902,-6.988,-8.831,12.643,-7.227,-6.917,12.090,-3.6…	NPVKMEVIVAIRGTKSLDDMYVDGHADEGFFEGSNGKTYRCHSGMLNCALWMAKVGKLEHWLNKLHSLGYKITLTGHSLGAGVATLLGCLLKTSNPNMHVDVYGYAVPACVGHDLSHECKGSLIRVHSLVNRDDFVSRATAPNIRAMAAEIKSRRDQWEPFLKNDLMN
1DT3	MGYP001158717009	224	135	6	63	268	3	210	1	6.429e-10	311	269	210	VTGFLALDNTNKLIVLSFRGSRSIENWIGNLNFDLKEINDICSGCRGHDGFTSSWRSVADTLRQKVEDAVREHPDYRVVFTGHSLGGALATVAG---ADLRGNGYDIDVFSYGAPRVGNRAFAEFLTVQTGGTLYRITHTNDIVPRLPPREFGYSHSSPEYWIKSGTLVPVTRNDIVKIEGIDATGGNNQPNI-----------PDIPAHLWY----FGLIGTC	ERGILGIHKKEHTLYLAFRGSSNIQNWLDNIQFSRICPYESSPDVCVETGFYKVFEYMKEDIMKELILLSEKYDIQNVVCTGHSLGAAVATLFAYHIQEEYNEILEVSLITFGSPRIGNKVFVD----QGPRHGLRITHANDIVVHTPQMILGYEHVPHEVWYNEE------NSDFVN------CDDNEEEDLSCSDSCGPLHCTSVEDHLYYLNISLGTDGDC	13.805,3.110,11.686,11.259,5.624,12.377,8.546,3.767,10.911,5.340,4.941,12.248,1.710,4.110,12.130,-1.162,6.346,13.206,-4.503,5.043,14.266,-7.517,7.335,13.992,-11.180,6.682,14.771,-14.306,8.067,13.213,-16.897,7.071,15.848,-19.984,7.946,13.824,-18.945,5.743,10.955,-17.512,2.911,13.044,-14.310,3.393,11.031,-10.688,2.930,12.035,-7.995,4.584,9.923,-4.537,3.024,9.729,-2.042,5.546,8.252,1.598,4.695,7.562…	HGERGILGIHKKEHTLYLAFRGSSNIQNWLDNIQFSRICPYESSPDVCVETGFYKVFEYMKEDIMKELILLSEKYDIQNVVCTGHSLGAAVATLFAYHIQEEYNEILEVSLITFGSPRIGNKVFVDQGPRHGLRITHANDIVVHTPQMILGYEHVPHEVWYNEENSDFVNCDDNEEEDLSCSDSCGPLHCTSVEDHLYYLNISLGTDGDC
1DT3	MGYP001160450659	315	163	12	7	269	41	341	1	1.493e-15	505	269	341	FNQFNLFAQYSAAAYCGK-----NNDAPAGTNITCTGNAC-PEVEKADATFLYSFEDSGVG-DVTGFLALDNTNKLIVLSFRGSRSIENWIGNLNFDLKEINDI--------------CSGCRGHDGFTSSWRSVADTLRQKVEDAVREHPDYRVVFTGHSLGGALATVAGADLRGNGYDIDVFSYGAPRVGNRAFAEF---------LT---------VQTGGTLYRITHTNDIVPRLPPREFGYSHSSPEYWIKSGTLVPVTRNDIVKIEGIDATGGNNQPNIPDIP-------------AHLWYFGLIGTCL	FAELQKYAHLASVAYCIEKGLTLGLVGEQGDK--CPSSACSHKETKA-LEIVRRFEFTGLFEVGSGIIAVDESSKSIYLAFMGTSTYQDWLNNLSAMPVLYRPLVVTSDDFKAVDNRDCVNCRVHKGINSFLKLNGAIVLKEVLKVKKELPDYRLVVTGHSLGAALATLAGIELRLLGFETLVVTLAGPKVGERNFAKFVDELFDTSNVTKRIDEEKSFDHIGTALVRMVHLHDVVPYLPPTR-FFKHSGYEYYLAKEGLT-QTPETIERRG---------QSYVEDEPLNYLEVLPNFRRMDHASYFLPVSHCT	32.458,-8.308,-10.964,33.624,-4.772,-10.570,31.816,-2.419,-8.423,30.991,-0.163,-11.222,31.183,2.935,-9.334,28.086,4.723,-9.739,29.569,7.929,-9.197,26.631,9.750,-8.435,27.484,12.704,-10.406,26.777,15.347,-7.886,28.489,17.336,-10.462,27.784,20.870,-10.426,24.741,22.512,-10.181,26.075,25.921,-10.487,22.908,27.433,-10.851,22.340,30.612,-9.103,19.891,31.341,-6.596,16.893,32.812,-7.783,14.861,31.356,-5…	LSPMLFHLWLLGLGYISSVGAYALSKTDGVNCKDSESSSDFAELQKYAHLASVAYCIEKGLTLGLVGEQGDKCPSSACSHKETKALEIVRRFEFTGLFEVGSGIIAVDESSKSIYLAFMGTSTYQDWLNNLSAMPVLYRPLVVTSDDFKAVDNRDCVNCRVHKGINSFLKLNGAIVLKEVLKVKKELPDYRLVVTGHSLGAALATLAGIELRLLGFETLVVTLAGPKVGERNFAKFVDELFDTSNVTKRIDEEKSFDHIGTALVRMVHLHDVVPYLPPTRFFKHSGYEYYLAKEGLTQTPETIERRGQSYVEDEPLNYLEVLPNFRRMDHASYFLPVSHCT
1DT3	MGYP001164902482	178	111	7	77	247	4	169	1	2.074e-11	380	269	198	VLSFRGSRSIENWIGNLNFDLKEI-NDICSG---CRGHDGFTSSW--RSVADTLRQKVEDAVREHPDYRVVFTGHSLGGALATVAGADLR-GNGYDIDVFSYGAPRVGNRAFAEFLTVQTGGTLYRITHTNDIVPRLPPREFGYSHSSPEYWIKSGTLVPVTRNDIVKIEGIDATGGN	NVIFRGSESKYDWYYDLQIFQKKLDDKYQNDEDNICVHTGFYKQLMKNNSYNKVLNEVKKGLENYPDYEIFITGHSLGGALCTLFGFLLSHEVSNHITVVSFASPRVGNNDWKEAYDQKENLIHYRISNNKDIVTASPM--WGYKHTGNNIRLFEDT--------YQYYP--DYSYNP	-19.303,-8.646,3.633,-16.809,-5.902,3.865,-16.002,-2.328,5.048,-14.289,-0.625,2.146,-11.589,2.078,2.675,-10.261,3.802,-0.484,-7.231,6.070,-0.490,-6.879,8.519,-3.279,-3.482,9.095,-5.082,-1.922,12.461,-5.812,-3.600,14.808,-8.309,-0.188,15.800,-9.500,1.772,12.693,-10.361,4.912,14.608,-11.098,5.196,16.722,-8.055,4.910,13.859,-5.675,7.566,11.803,-7.355,10.043,14.528,-7.036,9.070,14.952,-3.456,9.878,11…	KRINVIFRGSESKYDWYYDLQIFQKKLDDKYQNDEDNICVHTGFYKQLMKNNSYNKVLNEVKKGLENYPDYEIFITGHSLGGALCTLFGFLLSHEVSNHITVVSFASPRVGNNDWKEAYDQKENLIHYRISNNKDIVTASPMWGYKHTGNNIRLFEDTYQYYPDYSYNPWWDYSLFNCWSISDHNCDLYYKRLIKNIW
1DT3	MGYP001166289833	193	110	11	1	173	49	204	0.214	0.7433	40	269	328	EVSQDLFNQF--NLFAQYSAAAYCGKNNDAPAGTNITCTGNACPEVEKADATFLYSFEDSGVGDVTGFLALDNT--NKLIVLSFRGS----RSI---ENWIGNLNFDLKEINDICSGCR-----GHDGFTSSWRSVADTLRQKVEDAVREHPDYRVVFTGHSLGGALATVAG----ADLRGNGYDIDVFSYGA	PSYQERLDYAKTARSNEELICNLQSFNNKVSF-SKLEASG------------------------NEIFKFEPKSKKDNQIGIYFHGGGYFYCGINSHKNFISNL------ADDLQI--TIYFFHYRLAPEHTFPAAHNDAKQVVEYIETIHPEENKIWIGESAGGNLAASICIDESFELKPS----ALVLMSP	35.538,13.801,-4.545,32.312,12.011,-4.346,31.177,13.673,-1.267,31.699,17.087,-2.645,29.847,16.155,-5.727,27.114,14.909,-3.654,26.967,18.048,-1.628,26.946,20.137,-4.752,24.278,18.096,-6.145,22.494,18.546,-2.988,22.847,22.223,-2.977,21.641,22.392,-6.563,18.770,20.210,-5.858,17.863,22.374,-3.051,17.763,25.281,-5.084,15.797,23.521,-7.499,13.282,22.163,-5.252,11.761,24.745,-3.274,9.849,23.509,-0.289,1…	MISVLVSLIETIVYKLIPNLPSFTRTPLYRKFLLLRKLRDYLIMANGSPSYQERLDYAKTARSNEELICNLQSFNNKVSFSKLEASGNEIFKFEPKSKKDNQIGIYFHGGGYFYCGINSHKNFISNLADDLQITIYFFHYRLAPEHTFPAAHNDAKQVVEYIETIHPEENKIWIGESAGGNLAASICIDESFELKPSALVLMSPWLDLSDKLLDRRYLKNKDILITLDGMVDVGSYYSKGYDTTDPLISPVFGDVSNFPPVFLQVASNELLFNDAIEFNKKLNSSNVECTLDAWDNLWHAWQFFPINEAKEARKRIAEFINKLELINH
1DT3	MGYP001166885000	255	147	13	2	206	169	407	1	1.305e-07	224	269	522	VSQDLFNQFNLFAQYSAAAYC-------GKNNDA--------------PAGTNI-------------TCTGNAC--PEVEKADATFLYSFE------DSGVGDVTGFLALDNTNKLIVLSFRGSRSIENWIGNLNFDLKEINDICSGCRGHDGFTSSWRSVADTLRQKVEDAVREHPDYRVVFTGHSLGGALATVAG------ADLRGNGYDIDVFSYGAPRVGNRAFAEFLTV--QTGGTLYRITHTNDIVPRL	LGPDEATTGLYWMKFASSAYGFAFCKALGLLGEASMEDVKATFEASGMKGGESIEKDLETLQTMANKTCIMQHTTVERLDDVK----KIHLPVLNAVSSP--GY--FIAVDDRSRNIVIAVRGTSTINDAITDIVCENEPF----LTGSAHNGMIAAAKSIFDENQSLLIQLRSKNKGYGVVVTGHSLGAGTAILLSMLVMDSASFKDGAFKVKCYAFAPPPVFTP--LENVKLEWKAAINV--YCLRHDVVPRL	13.666,6.554,31.523,14.569,5.941,27.890,17.130,3.261,27.814,20.119,4.850,26.087,20.339,3.726,22.618,23.333,1.535,22.638,25.887,2.816,20.232,26.123,0.199,17.704,29.697,-0.971,17.903,31.630,1.182,15.448,32.105,-1.424,12.880,35.799,-1.844,12.560,36.260,-1.103,8.925,37.435,-4.592,8.271,40.403,-4.321,5.761,38.796,-6.321,3.147,38.272,-3.834,0.510,41.685,-3.129,-0.470,42.438,-6.362,-2.097,39.879,-6.081,…	MAAPRGKLPDDEPGSSVMLSKSMDVTIASGLCVGIITYAVASTNMVSEASSLSLSPLPLRQTAGAIGVTAGLVTSSTVAFFSYLYYSKHRIKHRIKQQLLSHLDEDTRSALVAIEATLAKLEEKLMHSGGGAKPWVPHYPFVLNLALEARIHRNFLLNQTATAKRGNRLGPDEATTGLYWMKFASSAYGFAFCKALGLLGEASMEDVKATFEASGMKGGESIEKDLETLQTMANKTCIMQHTTVERLDDVKKIHLPVLNAVSSPGYFIAVDDRSRNIVIAVRGTSTINDAITDIVCENEPFLTGSAHNGMIAAAKSIFDENQSLLIQLRSKNKGYGVVVTGHSLGAGTAILLSMLVMDSASFKDGAFKVKCYAFAPPPVFTPLENVKLEWKAAINVYCL…
1DT3	MGYP001167092816	162	114	5	53	211	4	153	1	1.115e-05	190	269	227	YSFEDSGVGDVTGFLALDNTNKLIVLSFRGSRSIENWIGNLNFDLKEINDICSGCRGHDGFTSSWRSVADTLRQKVEDAVREHP--DYRVVFTGHSLGGALATVAGADLRGNGYDIDVFSYGAPRVG-NRAFAEFLTVQTGGTLYRITHTNDIVPRLPPREF	LHASGRGSHRPAFCMLGSVERREAVLVVRGTNDLSDVLTDSYAEGTPFC----GGWAHTGMARAAR----WLRREVAPALQQLRACGYSITLAGHSLGAGVASLLAALLLPEYPDITMVGFATPSCASGRTLLRRLGACCCSVILR----NDAVPRATLSSV	-4.409,-17.609,18.412,-5.806,-18.828,15.219,-3.649,-18.124,12.250,-5.014,-17.927,8.807,-2.423,-18.421,6.092,-2.935,-18.028,2.466,-0.450,-18.379,-0.247,-1.611,-16.617,-3.218,-0.575,-18.275,-6.326,-0.695,-15.680,-9.126,-0.055,-12.332,-10.136,-1.525,-9.870,-7.696,-2.278,-12.383,-4.917,-0.175,-11.298,-2.043,0.680,-13.674,0.784,-1.003,-12.603,4.053,-1.592,-13.800,7.592,-4.200,-12.875,10.227,-3.228,-12…	GASLHASGRGSHRPAFCMLGSVERREAVLVVRGTNDLSDVLTDSYAEGTPFCGGWAHTGMARAARWLRREVAPALQQLRACGYSITLAGHSLGAGVASLLAALLLPEYPDITMVGFATPSCASGRTLLRRLGACCCSVILRNDAVPRATLSSVRCLLDELAAFSEWRESAAEDWNSVLGRAKTLWAPNLRGAAGPGSPSPLMSEPRPSDLAASGPTSGLAPPPLPPA
1DT3	MGYP001170809320	244	142	14	1	231	3	219	1	3.194e-13	396	269	275	EVSQD-----LFNQFNLFAQYSAAAYCGKNNDAPAGTNITCTGNACPEVEKA-DATFLYSFEDSGVGDVTGFLALDNTNKLIVLSFRGSR-SIENWIGNLNFDLKEINDICSGCRGHDGFTSSWRSVADTLRQKVEDAVREHPDYRVVFTGHSLGGALATVAGAD-----LRGNGYDIDVFSYGAPRVGNRAFAE-FLTVQTGGTLYRITHTNDIVPRLPPREFGYSHSSPEYWIKSGTLVPVT	EFSLKGKGFNLQNAYNC-CLLSKAAYLPK-------------ELIAHQLIEEFGMSEVKKF--SNLN-CKGFIASS--EQVTVISFTGSEFDFDTWQENIDALFSPG-PFGSNDRVHRGFNLGISQIKDDLITKIKITQNK--KRPLFITGHSLGGAIANIFAAHLLHEELKPY----SIYTYGAPRVGCKKFKQLYNYISKG-ISFRIVNRHDIVPRTPPRLSTFDHVGELHYIDPSGAIQKG	2.509,-12.894,16.879,3.177,-9.677,14.892,4.995,-7.020,16.932,4.313,-3.493,15.720,6.720,-0.757,16.640,4.806,2.249,18.023,8.016,4.109,18.617,7.832,7.432,16.798,6.607,8.719,13.481,8.349,7.670,10.250,9.359,4.599,8.261,9.879,1.485,10.461,11.310,-1.596,8.847,9.577,-4.085,11.279,6.186,-2.378,10.552,7.000,-2.580,6.834,7.621,-6.362,7.188,4.452,-6.949,9.292,2.317,-4.907,6.836,3.800,-6.908,3.911,2.788,-10.2…	MLEFSLKGKGFNLQNAYNCCLLSKAAYLPKELIAHQLIEEFGMSEVKKFSNLNCKGFIASSEQVTVISFTGSEFDFDTWQENIDALFSPGPFGSNDRVHRGFNLGISQIKDDLITKIKITQNKKRPLFITGHSLGGAIANIFAAHLLHEELKPYSIYTYGAPRVGCKKFKQLYNYISKGISFRIVNRHDIVPRTPPRLSTFDHVGELHYIDPSGAIQKGISAWRRLLMYLDPSGKTPKAHIKEIIKRLPNAIDDHSLENYLERINQALKNQEVHN
1DT3	MGYP001173117949	149	91	5	80	220	2	145	1	4.743e-10	340	269	188	FRGSRSIENWIGNLNFDLKEINDICSG----CRGHDGFTSSWRSVA--DTLRQKVEDAVREHPDYRVVFTGHSLGGALATVAGADLR--GNGYDIDVFSYGAPRVGNRAFAEFLTVQTGGTLYRITHTNDIVPRLPPREFGYSHSSPEY	FRGSESTMDWIYDFMVWKTAF---KYGNKSFGKVHFGFYNQIMANNFMLHLSTLVEEQIHLHPDYEWELTGHSAGGAQCILVGYLLAYTFQDKHFTINSLAAPRVGDKTFAKLFQNRQNVTHYRICYNRDIITAVPM--IGYYHTGTSL	-2.600,-10.164,-2.414,-2.972,-7.175,-4.766,-1.684,-7.303,-8.243,0.162,-4.406,-9.885,-0.505,-3.026,-13.282,0.764,-4.691,-16.409,1.930,-1.419,-17.714,3.871,0.493,-15.166,4.858,3.268,-17.474,1.487,4.218,-18.699,0.648,4.244,-15.129,3.347,6.702,-14.080,1.955,9.264,-16.327,-1.470,8.875,-14.993,-0.275,9.662,-11.359,0.286,13.171,-11.561,-2.672,14.713,-10.822,-5.696,13.798,-9.055,-6.619,13.693,-5.443,-10.…	VFRGSESTMDWIYDFMVWKTAFKYGNKSFGKVHFGFYNQIMANNFMLHLSTLVEEQIHLHPDYEWELTGHSAGGAQCILVGYLLAYTFQDKHFTINSLAAPRVGDKTFAKLFQNRQNVTHYRICYNRDIITAVPMIGYYHTGTSLLYVDNKWEIDSNHPFYIYRCWSVSDHSVDKYVKALHNNKKEIE
1DT3	MGYP001174425131	288	184	12	1	258	3	271	1	2.475e-12	362	269	283	EVSQDLFNQFNLFAQ-YSAAAYCGKNNDAPAGTNIT-------CTGNACPEVEKAD---------ATFLYSFEDSGVGDVTGFLALDNTNKLIVLSFRGSRSIENWIGNLNFDLKEINDICSGCRGHDGFTSSWRSVA--DTLRQKVEDAVR--EHPDYRVVFTGHSLGGALATVAG--ADLRGNGYDIDVFSYGAPRVGNRAFAEFLTVQTGGTLYRITHTNDIVPRLPPREFGYSHSSPEYWIKSGTLVPVTRNDIVKIEGIDATGGNNQP-------NIPDIPAH	WKEENIDDTIKEMGNLVTLIYDYAKHWRLDNFNNINAFLRDNVDNEELSPRERNTILTLSTNYPDGQVLRFF--TNRADLQCVVGKNPHKKRFTLIFRGSEGFWDWVYDMCVFKVKLGD--YGMKVHSGFYNQLMYNHTFEEIRQYIINYSNEYQYRDWEWVVSGHSLGGALSVLAGYLLASYITYFKWTVISFASPKVGNKVFRDNFELCQNLRHYRVSNNYDLVTSLPT--FWYYHTGYNLWYCKEDGV------WKR-------YGYKKPPYSYYFYNFYNPYDH	6.810,-7.060,20.432,6.838,-10.284,19.057,5.257,-9.934,15.778,4.628,-13.236,14.765,5.402,-13.649,11.295,2.931,-16.218,11.412,0.561,-16.084,8.677,2.109,-13.171,6.817,1.681,-15.146,3.584,-2.096,-15.466,4.087,-2.229,-11.666,4.818,-0.144,-10.970,1.627,-2.498,-13.183,-0.478,-5.595,-11.479,1.010,-4.133,-7.937,0.395,-3.126,-8.974,-3.180,-6.746,-10.045,-3.898,-8.193,-6.837,-2.258,-5.764,-4.565,-4.173,-6.7…	MDWKEENIDDTIKEMGNLVTLIYDYAKHWRLDNFNNINAFLRDNVDNEELSPRERNTILTLSTNYPDGQVLRFFTNRADLQCVVGKNPHKKRFTLIFRGSEGFWDWVYDMCVFKVKLGDYGMKVHSGFYNQLMYNHTFEEIRQYIINYSNEYQYRDWEWVVSGHSLGGALSVLAGYLLASYITYFKWTVISFASPKVGNKVFRDNFELCQNLRHYRVSNNYDLVTSLPTFWYYHTGYNLWYCKEDGVWKRYGYKKPPYSYYFYNFYNPYDHSCDRYLESLQKL
1DT3	MGYP001179076845	212	116	9	2	205	12	182	1	3.565e-08	223	269	194	VSQDLFNQFNLFAQYSAAAYCGKNNDAPAGTNITCTGNACPEVEKADATFLYSFEDSGVGDVTGFLALDNTNKLIVLSFRGSRSIENWIGNLNFDLKEINDICS--------GCRGHDGFTSSWRSVADTLRQKVEDAVREHPDYRVVFTGHSLGGALATVAGADLRGNGYDIDVFSYGAPRVGNRAFAEFLTVQTGGTLYRITHTNDIVPR	ITDDDVERAWRLTR-KAY-------DDDDFEGLEVD----------DTRAV----------IDG------TGSTVHVAFRGTATALDAARDVSFLLRPLSEFPALRVGDDAWAARVHSGFATAAAAVADQ----VADKLGAWPRKRVVLSGHSLGGALAVLVGGALKGRGRDVQLCTFGAPPPGDTQYARLF-AGVPCLR--FANRCDPVPR	15.209,-17.450,2.919,13.667,-14.702,4.630,16.018,-13.700,7.128,14.065,-13.573,10.147,14.990,-10.211,10.566,12.822,-9.790,13.417,9.328,-9.748,12.544,9.186,-9.772,16.166,8.019,-6.389,16.816,5.822,-5.432,14.279,2.914,-7.397,15.474,2.610,-8.914,11.987,2.516,-12.810,12.298,3.837,-15.390,9.761,0.079,-16.125,9.063,-0.432,-12.420,8.248,2.642,-12.495,5.895,1.500,-15.688,4.087,-2.029,-14.319,3.808,-0.807,-…	MIEDAGIEGAGITDDDVERAWRLTRKAYDDDDFEGLEVDDTRAVIDGTGSTVHVAFRGTATALDAARDVSFLLRPLSEFPALRVGDDAWAARVHSGFATAAAAVADQVADKLGAWPRKRVVLSGHSLGGALAVLVGGALKGRGRDVQLCTFGAPPPGDTQYARLFAGVPCLRFANRCDPVPRSLGGADAGGKIG
1DT3	MGYP001183780113	150	95	5	75	222	9	145	1	9.005e-08	248	269	196	LIVLSFRGS--RSIENWIGNLNFDLKEINDICSGCRGHDGFTSSWRSVADTLRQKVEDAVREHPDYRVVFTGHSLGGALATVAGADLRGNGYDIDVFSYGAPRVGNRAFAEFLTVQTGGTLYRITHTNDIVPRLPPREFGYSHSSPEYWI	YIVIAFRGTEPRQFSDIKADLMAWKRKS---RTEGHVHAGFKNEL----DKLWADIKMGLSRKGDRTIFLCGHSLGGAIATVCASRLEKDVEELY--TYGSPRVGDRRWVKT----MQVSHYRYQNNNDVVCKVPFWIMGYRHHGTNIYL	-0.867,3.350,13.459,-3.655,5.957,13.942,-7.210,4.989,14.665,-9.819,7.649,13.988,-13.465,6.981,14.925,-16.792,8.651,14.345,-20.403,7.455,14.628,-20.437,5.536,11.299,-16.917,4.441,10.499,-13.400,3.530,11.855,-10.341,4.580,9.872,-7.041,2.817,10.652,-4.134,4.687,9.077,-0.618,3.236,8.950,2.393,5.438,8.557,5.301,4.615,6.269,8.932,4.831,7.224,10.529,8.175,7.743,12.440,9.247,4.730,15.694,9.214,6.643,15.3…	CHIVKNRDYIVIAFRGTEPRQFSDIKADLMAWKRKSRTEGHVHAGFKNELDKLWADIKMGLSRKGDRTIFLCGHSLGGAIATVCASRLEKDVEELYTYGSPRVGDRRWVKTMQVSHYRYQNNNDVVCKVPFWIMGYRHHGTNIYLNYKGNAVTLRWWRRCIDSMRGRLRAWSKLQFFDGVYDHDITTYAKRLKGVS
1DT3	MGYP001184442863	144	97	5	66	205	25	146	1	0.0005135	120	269	181	FLALDNTNKLIVLSFRGSRS-IENWIGNLNFDLKEINDICSGCRGHDGFTSSWRSVA---DTLRQKVEDAVREHPDYRVVFTGHSLGGALATVAGADLRGNGYDIDVFSYGAPRVGNRAFAEFLTVQTGGTLYRITHTNDIVPR	SVWIDDDEHKIHVGIRGTKAEVGDILAD--------AHI------------VYNNTSGNVDDLVEYLEKVSEKYPDWTLDASAHSLGGSELLEAAVNNDLGYDRFNMLNPGMNPFWGLNNAQSAVDDDRFHWYL--NSGDMVSN	6.161,0.689,27.444,7.362,-0.959,24.274,6.408,1.101,21.368,4.295,-1.802,21.042,1.519,-1.211,23.154,0.307,2.020,22.068,-0.569,0.689,19.077,-3.173,-1.559,19.820,-5.817,0.975,19.382,-6.369,3.925,17.133,-9.791,5.145,18.117,-12.249,2.403,17.566,-9.760,0.325,15.646,-8.204,-2.829,17.152,-5.703,-5.338,15.833,-6.400,-8.882,14.742,-3.416,-10.508,16.415,-4.277,-13.870,14.692,-3.597,-12.292,11.274,-0.625,-10.…	TTIDDRRDNIGDWHRDAGLDTERYSVWIDDDEHKIHVGIRGTKAEVGDILADAHIVYNNTSGNVDDLVEYLEKVSEKYPDWTLDASAHSLGGSELLEAAVNNDLGYDRFNMLNPGMNPFWGLNNAQSAVDDDRFHWYLNSGDMVSNGFASMVNDDTDVTWSKPQSSPLYNHQLTQWTGETY
1DT3	MGYP001185749299	184	109	7	7	180	24	180	1	1.305e-07	220	269	181	FNQFNLFAQYSAAAY-----CGKNNDAPAGTNITCTGNACPEVEKADATFLYSFEDSGVGDVTGFLALDNTNKLIVLSFRGSRS--IENWIGNLNFDLKEINDICSG--CRGHDGFTSSWRSVADTLRQKVEDAVREHPDYRVVFTGHSLGGALATVAGADLRGNGYDI-DVFSYGAPRVGNRA	LDTCLLMARWSEYAYSFRGDFLDGYEVEIIKD-----------EKTDSIC--------------LVALNENSSKIIISFQGSVGDVRDILTNAFLFHAGYDNPNLMGATTRIHSGYYYAVLQIKDKIDYKVKQLLLKEPNAQIFVCGHSKGGGQAYI--YTLLNTLFDFAGIYTFGSPRVFNKS	28.665,-17.385,6.072,26.313,-14.558,6.722,26.381,-15.493,10.248,22.725,-15.957,11.068,23.645,-14.577,14.267,21.767,-11.742,13.143,18.822,-13.705,13.448,19.065,-14.179,17.048,18.507,-10.741,17.683,15.538,-10.806,15.657,13.949,-13.087,17.808,15.208,-12.355,21.094,12.706,-10.002,21.634,9.845,-12.147,21.910,8.198,-9.239,22.703,5.220,-11.057,22.864,4.214,-9.907,19.883,1.067,-9.846,21.429,0.209,-12.365…	GLSIERDAYLFQEKQSLDETAFDLDTCLLMARWSEYAYSFRGDFLDGYEVEIIKDEKTDSICLVALNENSSKIIISFQGSVGDVRDILTNAFLFHAGYDNPNLMGATTRIHSGYYYAVLQIKDKIDYKVKQLLLKEPNAQIFVCGHSKGGGQAYIYTLLNTLFDFAGIYTFGSPRVFNKSG
1DT3	MGYP001186051112	206	128	10	43	237	3	193	1	8.277e-14	432	269	199	EVEKADATFLYSFEDSGVGDVTGFLALDNTNKLIVLSFRGSRSIENWIGNLNFDLKEINDI--CSGCRGHDGFTSSW--RSVADTLRQKVEDAVREHPDYRVVFTGHSLGGALATVAGADL------RGNGYDIDVFSYGAPRVGNRAFAEFLTVQTGGTLYRITHTNDIVPRLPPREFGYSHSSPEYWIKSGTLVPVTRND-IVK	NITKG-TEILYA-DDSKPKKLGFFIAINKKENFIIISFRGSSNIENWLTNIDESLLNVDNIYKTKNAFIHRGFFENVFNNEVYFKIERELSNIQKQYPNFKIIFTGHSLGGCSSNLAASLFSVRQKIKPEK--IICYNFASPRFCNKSLSEK--IDKLFLSFRITNLKDKITQVPSIE-KFYHTKNEYY--------YTGNNEIIK	-18.592,-7.276,-2.332,-21.890,-5.967,-1.931,-22.121,-7.028,1.566,-18.952,-5.482,2.733,-20.237,-2.177,2.132,-23.241,-2.848,4.155,-22.355,-1.322,7.506,-19.205,0.240,6.517,-18.992,3.908,7.784,-16.702,6.397,6.159,-14.854,8.179,9.022,-12.466,10.311,7.010,-11.975,11.266,3.315,-9.232,13.364,1.711,-9.986,13.832,-1.986,-9.626,17.478,-2.198,-6.881,18.313,-4.289,-5.996,17.735,-7.775,-2.605,15.977,-7.877,-2.…	FSNITKGTEILYADDSKPKKLGFFIAINKKENFIIISFRGSSNIENWLTNIDESLLNVDNIYKTKNAFIHRGFFENVFNNEVYFKIERELSNIQKQYPNFKIIFTGHSLGGCSSNLAASLFSVRQKIKPEKIICYNFASPRFCNKSLSEKIDKLFLSFRITNLKDKITQVPSIEKFYHTKNEYYYTGNNEIIKTNTLNN
1DT3	MGYP001188753560	184	124	7	1	170	38	205	1	1.747e-06	198	269	208	EVSQDLFNQFNLFAQYSAAAYCGKNNDAPAGTNITCTGNACPEV----EKADATFLYSF--EDSGVGDVTGFLALDNTNKLIVLSFRGSRSIENWIGNLNFDLKEINDICSGCRGHDGFTSSWRSVADTLRQKVEDAVREHPDYRVVFTGHSLGGALATVA--------GADLRGNGYDIDVFS	MLPVEQAVSINRISQFALGTY---------SASWSSGEEEIGRAMGVEPED---VVFAWCSDEGGDLCPKFIIILDHESEAVVLAIRGTFCLKDVILDMVCDDAPF---LDG-YTHRGIREGAEQVWEKSSPALLAALALHPTYSLVLTGHSLGAGVAVLLAFELLVGEGATALPPSTEVCCLA	-9.043,-15.756,-19.066,-5.800,-14.831,-17.696,-6.858,-13.406,-14.491,-8.170,-16.650,-13.124,-4.876,-18.240,-13.247,-3.493,-15.824,-10.836,-5.974,-16.871,-8.342,-4.562,-20.303,-7.906,-1.116,-19.332,-7.276,-1.337,-17.092,-4.415,1.112,-19.382,-3.091,2.208,-16.496,-0.948,5.482,-17.624,-1.955,7.339,-15.532,0.546,9.954,-15.638,-2.040,12.528,-13.640,-0.122,14.080,-12.456,-3.346,17.813,-12.946,-2.626,19.…	MEAAEYASSSILLLALVRVVEEEVELPAWECDLPESTMLPVEQAVSINRISQFALGTYSASWSSGEEEIGRAMGVEPEDVVFAWCSDEGGDLCPKFIIILDHESEAVVLAIRGTFCLKDVILDMVCDDAPFLDGYTHRGIREGAEQVWEKSSPALLAALALHPTYSLVLTGHSLGAGVAVLLAFELLVGEGATALPPSTEVCCLALAP
1DT3	MGYP001190397435	214	114	10	13	219	2	181	1	7.076e-11	334	269	190	FAQYSAAAYCGKNNDAPAGTNITCTGNACPEVEKAD-----ATFLYSFEDSGVGDVTGFLALDNTNKLIVLSFRGS-RSIENWIGNLNFDLKEINDICSGCRGHDGFTSSWRSVADTLRQKVEDAVREHPDYRVVFTGHSLGGALATVAGADLRGNGYDI-DVFSYGAPRVGNRAFAEFLTVQTGGTLYRITHTNDIVPRLPPREFGYSHSSPE	LALASRLAYANR--------------GAVESTTRGQWGLKSCVFIDADD------TQCFVASS--HTAVLVAFRGTERVLADWLADLNVFSTDRAY----GTVHRGFRSAFGVVDTQLRT----ELTRFPGQPVLLTGHSLGGALAMIAAAEWRGV-FDVKSVYTYGQPAVGRANFVGFMNQHYTGKLLRVVNNDDIVARVPP---TYSHVGRL	-11.460,-9.580,-0.873,-8.291,-7.685,-0.904,-8.562,-6.883,-4.617,-12.075,-5.568,-3.950,-10.735,-3.488,-1.066,-7.988,-2.032,-3.266,-10.627,-0.959,-5.751,-13.008,0.284,-3.008,-10.236,2.685,-1.812,-11.087,4.880,-4.908,-14.695,5.316,-3.716,-15.973,8.203,-1.566,-16.344,7.809,2.227,-20.097,6.897,2.133,-19.558,4.154,-0.531,-16.584,2.725,1.465,-18.606,2.602,4.724,-21.732,1.218,3.048,-19.772,-1.514,1.292,-…	SLALASRLAYANRGAVESTTRGQWGLKSCVFIDADDTQCFVASSHTAVLVAFRGTERVLADWLADLNVFSTDRAYGTVHRGFRSAFGVVDTQLRTELTRFPGQPVLLTGHSLGGALAMIAAAEWRGVFDVKSVYTYGQPAVGRANFVGFMNQHYTGKLLRVVNNDDIVARVPPTYSHVGRLIRFDAGGHA
1DT3	MGYP001190479383	171	120	5	51	211	14	174	1	1.261e-05	193	269	199	FLYSFEDSGVGDVTGFLALDNTNKLIVLSFRGSRSIENWIGNLNFDLKEINDICSGCRGHDGFTSSWRSVADTLRQKVEDAVREHPD----YRVVFTGHSLGGALATVAGADL------RGNGYDIDVFSYGAPRVGNRAFAEFLTVQTGGTLYRITHTNDIVPRLPPREF	LLHSYWGCATFCPAHALLVDEPFKRLVLMVRGTLSHEDALTDIGAVETPF----RDGHVHRGMLEAAHFVFDECMPPLQQFLEAQEEGGIHYNVEVTGHSLGAGVAALVTLLLEERWAWSKLGLHCF--AFAPPAVFTEELSMSCRH----IVTSVVNGYDMIPRTSAANI	7.090,-16.421,15.395,9.454,-13.639,14.525,6.594,-11.140,14.130,5.010,-12.125,17.502,8.423,-11.845,19.142,9.053,-8.384,17.704,5.637,-7.091,18.640,5.377,-8.826,22.012,1.918,-10.032,20.974,0.473,-13.287,22.159,-0.121,-16.106,19.564,-3.891,-15.620,20.068,-3.535,-12.124,18.671,-2.902,-13.555,15.202,-6.250,-13.976,13.374,-4.793,-14.749,9.879,-1.486,-14.877,8.056,-0.073,-15.645,4.599,3.698,-15.995,4.295…	DALLQMTGLAQEALLHSYWGCATFCPAHALLVDEPFKRLVLMVRGTLSHEDALTDIGAVETPFRDGHVHRGMLEAAHFVFDECMPPLQQFLEAQEEGGIHYNVEVTGHSLGAGVAALVTLLLEERWAWSKLGLHCFAFAPPAVFTEELSMSCRHIVTSVVNGYDMIPRTSAANIDLLIHELVMQSTRTKAIDLAGRVLG
1DT3	MGYP001190953050	244	138	9	7	239	2	210	1	4.215e-14	419	269	249	FNQFNLFAQYSAAAYCGKNND------APAGTNITCTGNACPEVEKAD-ATFLYSFEDSGVGDVTGFLALDNTNKLIVLSFRGSRSIENWIGNLNFDLKEINDICSGCRGHDGFTSSWRSVADTLRQKVEDAVREHPDYRVVFTGHSLGGALATVAG----ADLRGNGYDIDVFSYGAPRVGNRAFAEFLTVQTGGTLYRITHTNDIVPRLPPREFGYSHSSPEYWIKSGTLVPVTRNDIVKIE	TNMIKTAVNISQSTYCVRDNNFDCKTCSRSNIYEKIYSN------KGELAIYGY----------------NTEYKMNFIGFRGSNNIKNWITNIQFDIIYPY--GESIGIEKGFYNLFYSLKNDIYNDINLLVEKNNNNNIIITGHSLGGAISTLLTFDMLYNN--LPYNIYLITFGSPRVGNKNFVKFFNKSEI-YSKRITHYYDIVPHLPQSFLNYQHISNEIWYNL--------DNSHYQE	-4.117,2.828,16.833,-1.499,0.338,17.518,-3.976,-2.558,17.511,-5.449,-1.458,14.132,-1.840,-1.343,12.682,-1.255,-4.883,14.188,-4.483,-6.048,12.549,-3.504,-4.508,9.155,0.027,-6.131,9.244,-1.628,-9.496,10.005,-4.051,-8.998,7.049,-1.096,-7.959,4.787,1.006,-10.969,5.826,-2.022,-13.257,5.311,-2.205,-12.247,1.645,1.025,-14.352,1.115,-0.388,-17.416,2.897,-3.235,-17.829,0.543,-2.645,-21.028,-1.446,-4.928,-…	DTNMIKTAVNISQSTYCVRDNNFDCKTCSRSNIYEKIYSNKGELAIYGYNTEYKMNFIGFRGSNNIKNWITNIQFDIIYPYGESIGIEKGFYNLFYSLKNDIYNDINLLVEKNNNNNIIITGHSLGGAISTLLTFDMLYNNLPYNIYLITFGSPRVGNKNFVKFFNKSEIYSKRITHYYDIVPHLPQSFLNYQHISNEIWYNLDNSHYQECDDSENEDISCSNSCAPTHCTSLDDHLYYMNLTMGSNGC
1DT3	MGYP001191888472	148	92	9	75	210	12	156	1	4.079e-05	172	269	167	LIVLSFRGS-----RSIENWI-GNLNFDLKEINDICSGCRGHDGFTSSWRSVADTLRQKVEDAVREH-PDYRVVFTGHSLGGALATVAGADLRGNGYDI-DVFSYGAPR-VGNRAFAE--FLTVQTG-GTLYRITHTNDIVPRLPPRE	YIIIAWRGTDNVYKEDSWEWIATDFYFVPTAGDGPLAGTKMHGGIWSSFRIIRTKLMQ-TLDAFEAKTKNKKIFITGHSLGGGMALISAPYLAGKGYNIGEVYTYASPRTVGDQAFVNKTESLLGTARIQRF--EYGVDFVTKLWSPA	-42.878,-19.650,9.145,-40.297,-18.090,11.530,-37.882,-15.554,9.985,-34.369,-16.662,10.611,-31.925,-14.147,12.025,-30.790,-11.743,9.458,-27.185,-12.421,8.590,-24.878,-10.133,10.348,-23.995,-7.415,7.956,-20.273,-7.482,7.865,-18.932,-4.018,8.028,-15.661,-3.222,6.305,-13.433,-0.116,5.760,-12.205,0.763,2.317,-9.017,2.874,1.934,-8.760,4.166,-1.589,-5.372,5.719,-2.528,-5.498,8.161,-5.271,-2.774,8.187,-8…	PAKGPSPAVETYIIIAWRGTDNVYKEDSWEWIATDFYFVPTAGDGPLAGTKMHGGIWSSFRIIRTKLMQTLDAFEAKTKNKKIFITGHSLGGGMALISAPYLAGKGYNIGEVYTYASPRTVGDQAFVNKTESLLGTARIQRFEYGVDFVTKLWSPAIYSTTFKIPGH
1DT3	MGYP001192236076	241	143	8	2	239	12	209	1	4.315e-12	386	269	246	VSQDLFNQFNLFAQYSAAAYCGKNNDAPAGTNITCTGNACPEVEKADATFLYSFEDSGVGDVTGFLALDNTNKLIVLSFRGSRSIENWIGNLNFDLKEINDICSGCRGHDGFTSSW--RSVADTLRQKVEDAVREHPDYRVVFTGHSLGGALATVAGADLR-GNGYDIDVFSYGAPRVGNRAFAEFLTVQTGGTLYRITHTNDIVPRLPPREFGYSHSSPEYWIKSGTLVPVTRNDIVKIE	LDDTKKDIFENLKN-----------NSPLG------------------KVEKFVSDK-DTDLQVGITISEKNKRLSVIFRGTESYTDWKYDLMITKRKL---EGNIYVHNGFYQQLFRNHNFEKIKSKLLILLLEHPDYEINIIGHSLGGALSTLFGYLLAKSIKNKVTVISLGSPRVGNSYFKRDFDAQSNLKHYRISNNRDVITSVP--MINFYHTGVNIHL--------TNNNLTVYE	-14.861,14.995,18.141,-16.763,12.448,16.237,-17.661,14.220,13.300,-20.531,12.358,11.972,-19.314,10.655,9.057,-22.005,12.405,7.332,-20.130,15.404,6.604,-18.028,13.706,4.201,-20.525,11.916,2.423,-21.679,15.174,1.738,-18.651,16.032,0.061,-18.701,13.327,-2.253,-20.202,13.619,-5.527,-23.267,11.488,-5.762,-21.390,8.918,-7.570,-19.049,8.624,-4.772,-21.716,8.381,-2.291,-23.175,5.413,-3.896,-19.928,3.725,…	FVNNNSDFINELDDTKKDIFENLKNNSPLGKVEKFVSDKDTDLQVGITISEKNKRLSVIFRGTESYTDWKYDLMITKRKLEGNIYVHNGFYQQLFRNHNFEKIKSKLLILLLEHPDYEINIIGHSLGGALSTLFGYLLAKSIKNKVTVISLGSPRVGNSYFKRDFDAQSNLKHYRISNNRDVITSVPMINFYHTGVNIHLTNNNLTVYENYNYNRYLKFSLFNCWSVSDHNIELYYNRIKKLYHIE
[truncated: 6,250 more rows]
