# Supplementary material for: Identification of novel metagenomic lipases through integrated structural and sequence-based analysis
Source: PeerJ. 2026 Feb 2;14:e20462. doi: 10.7717/peerj.20462 (PMC12875215; doi:10.7717/peerj.20462)
Supplement: Supplemental Information 3 [file peerj-14-20462-s003.xlsx]

## Sheet: TS2
Supplementary Table 2. Sequence-based annotation results
Sequence Name	Sequence Description	Sequence Length	Blast Hit E-Value	Blast Top Hit Description (HSP)	Blast Top Hit E-Value	Blast Top Hit Length	Blast Top Hit Alignment Length	Blast Top Hit Query Start	Blast Top Hit Query End	%Blast Top Hit Similarity
MGYP000002602753	alpha/beta hydrolase	295	2.5E-42;2.6E-41;2.4E-39;1.0E-37;1.4E-37;1.4E-37;2.0E-37;6.2E-36;1.9E-35;6.5E-35;6.5E-35;1.1E-34;1.8E-34;2.5E-34;2.5E-34;3.5E-34;6.9E-34;6.9E-34;2.6E-33;3.7E-33	alpha/beta hydrolase [Paenibacillus mucilaginosus]	2.5e-42	291	270	7	273	53.33
MGYP000002909152	alpha/beta hydrolase	317	1.1E-198;5.9E-196;2.0E-194;6.3E-194;6.8E-193;1.2E-186;4.0E-185;1.9E-183;1.0E-180;3.4E-113;1.4E-68;6.2E-57;7.1E-52;3.8E-48;5.7E-39;3.4E-38;1.8E-36;3.8E-35;1.1E-33;7.5E-33	alpha/beta hydrolase [Microbulbifer bruguierae]	1.1e-198	309	309	9	315	93.2
MGYP000003353107	alpha/beta hydrolase	256	9.9E-130;1.4E-127;4.5E-124;1.3E-123;1.8E-123;1.5E-122;1.5E-122;2.1E-122;2.5E-94;2.8E-87;2.1E-86;4.3E-84;3.8E-83;6.3E-83;1.4E-82;2.8E-82;2.8E-82;4.0E-82;5.7E-82;3.3E-81	alpha/beta hydrolase [Extibacter muris]	9.9e-130	256	254	1	253	82.28
MGYP000005410503	alpha/beta hydrolase	284	5.2E-129;6.4E-120;6.2E-106;2.5E-105;5.1E-105;5.1E-105;2.3E-104;3.1E-100;3.5E-100;1.5E-99;8.5E-99;4.9E-98;1.3E-97;5.4E-97;6.5E-96;4.6E-95;1.1E-89;1.6E-88;9.5E-88;1.3E-85	alpha/beta hydrolase [Sphingopyxis macrogoltabida]	5.2e-129	282	280	1	280	78.21
MGYP000005738814	alpha/beta hydrolase	320	2.9E-234;7.4E-228;4.3E-227;3.5E-226;6.0E-144;1.2E-143;5.9E-142;3.5E-127;1.0E-126;2.1E-109;2.1E-109;2.9E-109;5.9E-109;7.5E-99;8.0E-94;5.3E-93;1.2E-91;5.9E-90;3.1E-89;1.8E-88	alpha/beta hydrolase [Corynebacterium dentalis]	2.9e-234	320	320	1	320	100
MGYP000007425058	alpha/beta hydrolase	250	7.8E-74;7.8E-74;1.6E-73;1.6E-73;1.6E-73;1.6E-73;1.6E-73;1.6E-73;1.6E-73;1.6E-73;4.5E-73;4.5E-73;4.5E-73;4.5E-73;4.5E-73;4.5E-73;4.5E-73;4.5E-73;4.5E-73;4.5E-73	alpha/beta hydrolase [Bifidobacterium longum]	7.8e-74	285	159	1	159	80.5
MGYP000007559849	thioesterase domain-containing protein	207	2.8E-43;2.8E-43;7.3E-39;6.3E-38;3.2E-37;4.1E-37;4.1E-37;4.5E-37;4.5E-37;4.5E-37;4.5E-37;5.3E-37;5.7E-37;6.2E-37;8.0E-37;8.7E-37;8.7E-37;8.7E-37;8.7E-37;8.7E-37	thioesterase domain-containing protein [Selenomonas ruminantium]	2.8e-43	441	219	6	206	58.9
MGYP000007998497	alpha/beta fold hydrolase	286	3.5E-57;7.9E-56;4.4E-55;5.4E-55;1.1E-54;1.2E-54;5.9E-54;9.0E-54;2.5E-53;2.5E-53;2.5E-53;2.5E-53;3.5E-53;3.6E-53;6.4E-53;7.1E-53;9.4E-53;1.2E-52;1.4E-52;1.4E-52	alpha/beta fold hydrolase [Vogesella sp. LIG4]	3.5e-57	308	295	2	286	54.92
MGYP000008689208	alpha/beta fold hydrolase	395	8.5E-290;4.2E-166;5.9E-166;1.6E-165;8.7E-165;3.1E-163;8.5E-163;1.4E-162;1.7E-162;2.4E-162;6.9E-162;6.5E-160;6.8E-160;1.3E-159;1.0E-158;1.0E-158;1.6E-158;3.1E-158;4.4E-158;7.3E-158	alpha/beta fold hydrolase [Janibacter massiliensis]	8.5e-290	395	395	1	395	99.49
MGYP000008803733	lipase family protein	309	2.9E-100;5.8E-100;4.3E-97;7.1E-75;1.4E-61;9.9E-60;4.6E-59;2.2E-52;3.9E-50;6.4E-50;2.2E-49;3.0E-49;8.9E-49;1.9E-47;2.1E-45;3.0E-45;2.5E-42;2.7E-42;4.1E-41;5.7E-41	lipase family protein [Vibrio cholerae]	2.9e-100	309	302	1	302	67.88
MGYP000010295452	alpha/beta fold hydrolase	242	1.5E-32;4.7E-32;1.1E-31;1.1E-30;3.2E-30;1.1E-29;1.7E-29;1.9E-29;1.1E-28;2.2E-28;2.3E-28;2.9E-28;3.5E-28;1.5E-27;2.5E-27;5.1E-27;3.0E-26;5.6E-26;8.5E-26;9.0E-25	alpha/beta fold hydrolase [Mycobacterium sp.]	1.5e-32	258	226	15	239	52.21
MGYP000010462297	triacylglycerol lipase	303	1.6E-135;5.6E-121;6.4E-120;9.4E-120;1.8E-117;1.8E-117;6.8E-117;1.8E-116;2.1E-116;5.7E-116;2.2E-115;1.1E-92;1.1E-76;1.7E-75;1.2E-73;2.1E-66;3.3E-64;1.1E-42;1.3E-38;1.4E-38	triacylglycerol lipase [Nannocystis sp.]	1.6e-135	468	239	1	238	90.79
MGYP000010943452	alpha/beta hydrolase	232	3.2E-101;1.9E-86;5.8E-82;2.0E-58;2.0E-58;1.1E-57;1.3E-56;1.3E-56;1.4E-56;1.5E-54;7.6E-54;5.2E-53;5.0E-51;2.0E-33;8.3E-24;2.1E-23;4.0E-19;5.8E-19;1.8E-18;1.8E-18	alpha/beta hydrolase [Roseomonas sp. AR75]	3.2e-101	288	229	3	231	75.98
MGYP000011283403	alpha/beta hydrolase	315	7.1E-58;1.4E-56;3.5E-53;4.4E-52;6.8E-52;8.9E-51;1.5E-49;3.0E-49;2.2E-48;2.8E-48;2.8E-48;3.4E-48;4.0E-48;1.6E-47;2.9E-47;6.3E-47;4.9E-46;5.3E-46;9.9E-46;1.4E-45	alpha/beta hydrolase [Actinoplanes polyasparticus]	7.1e-58	292	292	14	305	54.11
MGYP000011471071	hydrolase	244	1.2E-156;4.2E-154;5.4E-154;4.9E-153;4.9E-153;4.9E-153;4.9E-153;5.3E-153;6.3E-153;7.5E-153;1.1E-152;1.1E-152;1.1E-152;1.5E-152;1.5E-152;1.5E-152;1.5E-152;1.5E-152;1.5E-152;2.1E-152	hydrolase [Citrobacter sp. Marseille-Q6884]	1.2e-156	340	218	1	218	99.08
MGYP000011732348	alpha/beta fold hydrolase	287	2.1E-124;2.1E-122;9.2E-106;8.1E-103;7.6E-102;1.5E-101;9.3E-101;1.8E-100;1.3E-97;1.7E-97;5.9E-97;6.7E-97;1.5E-96;4.0E-96;5.3E-96;1.1E-95;4.1E-95;4.3E-95;5.0E-95;3.5E-94	alpha/beta fold hydrolase [Polaribacter pectinis]	2.1e-124	282	280	1	280	76.43
MGYP000013257023	alpha/beta hydrolase	279	1.2E-64;1.3E-63;1.9E-63;3.7E-63;3.7E-63;1.0E-62;2.1E-62;2.1E-62;5.9E-62;1.7E-57;3.1E-56;3.1E-55;1.4E-53;8.5E-42;2.7E-38;3.1E-38;4.5E-37;6.2E-37;4.8E-36;1.9E-33	alpha/beta hydrolase [Peristeroidobacter agariperforans]	1.2e-64	283	266	17	276	60.53
MGYP000013910028	alpha/beta hydrolase	171	8.6E-91;7.0E-43;1.8E-35;3.6E-35;4.7E-35;3.3E-34;7.5E-34;8.9E-34;9.5E-34;1.6E-33;1.7E-33;2.1E-33;2.1E-33;3.4E-33;3.6E-33;3.8E-33;4.2E-33;4.6E-33;5.9E-33;7.7E-33	alpha/beta hydrolase [Methanocella arvoryzae]	8.6e-91	199	171	1	171	87.13
MGYP000014379666	alpha/beta fold hydrolase	203	3.5E-34;2.8E-25;4.9E-25;5.4E-25;7.5E-25;7.7E-25;1.5E-24;1.5E-24;1.0E-23;1.6E-23;3.3E-23;6.0E-23;1.7E-22;2.4E-22;3.3E-22;3.3E-22;4.7E-22;4.9E-22;1.1E-21;1.4E-21	alpha/beta fold hydrolase [Haliangium ochraceum]	3.5e-34	342	173	2	173	60.69
MGYP000014550784	lipase family protein	260	4.7E-40;6.1E-39;3.2E-38;1.9E-36;2.3E-36;3.3E-36;3.4E-36;3.4E-36;3.4E-36;4.6E-36;5.8E-36;6.7E-36;6.7E-36;9.4E-36;1.6E-35;2.5E-35;4.8E-35;6.2E-35;7.0E-35;1.1E-34	lipase family protein [Fuerstiella marisgermanici]	4.7e-40	297	252	17	258	54.37
MGYP000015042741	alpha/beta hydrolase	307	2.0E-118;7.3E-84;2.8E-83;4.5E-82;6.3E-82;3.6E-81;4.2E-81;2.3E-80;4.1E-80;5.8E-80;1.3E-79;2.3E-79;2.5E-76;2.3E-72;7.9E-72;2.2E-66;1.9E-65;1.1E-64;2.8E-64;2.9E-62	alpha/beta hydrolase [uncultured Chloroflexus sp.]	2e-118	304	294	10	303	71.77
MGYP000016913979	lipase family protein	203	5.3E-50;4.7E-49;4.4E-44;1.7E-43;2.8E-42;1.3E-38;5.2E-38;2.6E-37;4.4E-33;2.5E-30;1.9E-28;1.9E-28;7.0E-27;3.5E-22;4.0E-22;2.0E-21;3.0E-21;8.0E-21;1.1E-20;1.1E-20	lipase family protein [Caballeronia mineralivorans]	5.3e-50	296	198	6	203	60.61
MGYP000017384206	alpha/beta fold hydrolase	289	2.1E-48;6.2E-41;6.5E-41;8.2E-41;3.6E-40;4.8E-40;5.0E-40;1.6E-39;3.2E-39;3.3E-39;3.3E-39;5.1E-39;8.0E-39;9.1E-39;9.1E-39;9.1E-39;1.4E-38;1.6E-38;1.9E-38;2.3E-38	alpha/beta fold hydrolase [Granulosicoccus antarcticus]	2.1e-48	313	189	2	188	61.38
MGYP000017531963	alpha/beta hydrolase	271	5.4E-31;5.8E-20;8.2E-17;1.1E-16;2.9E-16;5.7E-16;7.1E-16;7.2E-16;7.2E-16	alpha/beta hydrolase [uncultured Meiothermus sp.]	5.4e-31	274	227	6	226	55.07
MGYP000019749509	alpha/beta hydrolase	345	1.3E-126;1.3E-123;1.4E-115;1.0E-114;1.6E-101;1.5E-99;3.0E-98;2.6E-95;3.8E-95;8.2E-95;2.1E-90;3.0E-89;4.1E-87;1.1E-86;8.3E-84;4.1E-76;4.4E-73;4.4E-73;4.8E-73;6.9E-72	alpha/beta hydrolase [Desulfoscipio gibsoniae]	1.3e-126	355	345	1	339	70.72
MGYP000019803020	AcvB/VirJ family lysyl-phosphatidylglycerol hydrolase	288	1.6E-61;2.2E-60;2.2E-59;7.8E-59;2.2E-58;5.8E-58;6.8E-58;7.2E-58;7.9E-58;1.6E-57;2.0E-57;2.1E-57;5.9E-57;9.6E-57;2.1E-56;2.1E-56;2.2E-56;2.4E-56;3.1E-56;3.1E-56	AcvB/VirJ family lysyl-phosphatidylglycerol hydrolase [Geopsychrobacter electrodiphilus]	1.6e-61	476	206	81	284	65.05
MGYP000020061518	kynurenine formamidase-like	293	1.4E-214;5.1E-149;1.4E-148;2.3E-145;6.8E-100;3.1E-96;3.1E-96;4.4E-96;2.5E-85;3.6E-82;4.4E-72;6.4E-68;1.5E-66;4.3E-66;5.8E-66;5.8E-66;8.2E-66;1.8E-65;1.8E-65;2.2E-65	kynurenine formamidase-like [Acropora millepora]	1.4e-214	293	292	1	292	100
MGYP000020467298	alpha/beta fold hydrolase	178	8.1E-34;8.1E-34;2.1E-33;3.2E-33;3.2E-33;3.2E-33;5.2E-33;5.7E-33;8.1E-33;8.8E-33;8.8E-33;1.2E-32;2.4E-32;3.0E-32;3.1E-32;3.1E-32;3.2E-32;4.6E-32;4.8E-32;6.8E-32	alpha/beta fold hydrolase [Janibacter anophelis]	8.1e-34	308	174	1	171	63.79
MGYP000022075654	LssY C-terminal domain-containing protein	357	1.5E-48;1.6E-36;4.7E-32;3.1E-27;7.7E-26;5.3E-25;9.5E-24;1.7E-23;2.8E-23;9.0E-22;1.1E-21;1.2E-21;1.5E-21;7.0E-21;7.3E-21;8.5E-21;1.0E-20;1.0E-20;1.2E-20;1.3E-20	LssY C-terminal domain-containing protein [Occallatibacter savannae]	1.5e-48	661	308	46	349	56.82
MGYP000022106118	alpha/beta fold hydrolase	242	4.9E-29;8.4E-29;5.2E-27;1.2E-26;1.6E-26;6.6E-26;9.2E-26;2.7E-25;3.0E-25;4.4E-25;4.9E-25;8.0E-25;8.0E-25;8.6E-25;9.7E-25;1.0E-24;1.0E-24;1.0E-24;1.2E-24;1.7E-24	alpha/beta fold hydrolase [Candidatus Solirubrobacter pratensis]	4.9e-29	240	231	1	227	50.65
MGYP000022734343	3-oxoadipate enol-lactonase	275	4.2E-114;1.0E-113;1.5E-101;6.0E-100;6.8E-97;5.5E-96;8.7E-96;1.5E-95;3.3E-94;5.0E-94;1.5E-93;7.5E-93;8.2E-93;2.1E-92;3.5E-92;1.6E-91;2.0E-91;5.4E-91;6.6E-91;1.3E-90	3-oxoadipate enol-lactonase [Micromonospora sp. AP08]	4.2e-114	293	254	4	257	79.13
MGYP000023227645	alpha/beta fold hydrolase	285	4.9E-32;5.3E-29;5.8E-27;4.1E-25;8.3E-25;1.2E-23;1.4E-22;1.9E-22;2.9E-22;1.9E-21;3.7E-21;1.6E-20;3.4E-20;4.3E-20;1.2E-19;1.2E-19;1.4E-19;1.6E-19;2.8E-19;1.2E-18	alpha/beta fold hydrolase [Flocculibacter collagenilyticus]	4.9e-32	300	189	96	284	55.56
MGYP000023263691	alpha/beta hydrolase	270	6.9E-87;1.2E-86;1.1E-85;2.0E-85;2.9E-85;5.7E-85;1.2E-84;1.2E-84;1.8E-84;3.4E-83;4.6E-75;1.8E-65;1.8E-65;2.5E-65;3.2E-65;5.1E-65;1.0E-64;2.0E-64;2.9E-64;4.1E-64	alpha/beta hydrolase [Enterocloster asparagiformis]	6.9e-87	260	262	7	268	67.94
MGYP000024927899	alpha/beta fold hydrolase	245	3.0E-100;4.2E-98;5.3E-91;1.8E-82;2.5E-79;3.9E-79;6.8E-65;6.8E-65;1.4E-64;1.4E-62;1.6E-62;1.2E-61;2.4E-61;1.5E-60;8.9E-60;4.0E-59;4.7E-56;1.0E-54;1.5E-54;1.5E-54	alpha/beta fold hydrolase [Desulfatitalea alkaliphila]	3e-100	257	230	9	238	76.52
MGYP000025034497	alpha/beta hydrolase	278	3.2E-87;1.3E-86;1.5E-85;6.6E-84;1.2E-82;2.8E-81;1.5E-78;2.0E-76;2.4E-76;2.4E-76;2.0E-74;1.2E-73;1.2E-72;2.8E-72;3.8E-72;4.7E-72;1.1E-71;1.5E-71;2.0E-71;2.1E-71	alpha/beta hydrolase [Asanoa ferruginea]	3.2e-87	270	276	8	278	65.94
MGYP000025316709	hypothetical protein	367	4.3E-82;2.6E-81;2.9E-80;5.6E-80;5.8E-80;7.8E-80;1.2E-79;1.6E-79;2.3E-79;5.1E-79;6.0E-79;6.0E-79;1.3E-78;1.3E-78;1.8E-78;3.6E-78;5.4E-78;5.4E-78;8.3E-78;1.1E-77	hypothetical protein [Paraburkholderia edwinii]	4.3e-82	417	306	16	321	63.4
MGYP000025587256	lipase family protein	286	2.9E-39;1.9E-32;1.1E-30;1.5E-25;2.4E-25;1.3E-24;1.4E-24;5.0E-23;5.1E-23;1.4E-22;2.0E-22;8.0E-22;9.7E-22;1.1E-21;3.0E-21;3.5E-16;4.3E-16;8.2E-16;8.2E-16	lipase family protein [Bradyrhizobium japonicum]	2.9e-39	311	276	13	283	53.99
MGYP000026066410	alpha/beta fold hydrolase	285	2.4E-72;1.7E-71;1.7E-71;4.3E-70;8.3E-70;1.7E-69;2.0E-68;8.0E-67;1.0E-64;1.8E-62;2.0E-59;5.2E-59;4.6E-55;2.0E-25;2.2E-25;3.1E-25;3.1E-25;3.1E-25;3.9E-25;3.9E-25	alpha/beta fold hydrolase [Bacteriovorax sp. BSW11_IV]	2.4e-72	288	264	14	277	64.02
MGYP000026067885	MULTISPECIES: lipase family protein	240	3.3E-175;4.7E-175;6.6E-175;1.3E-174;1.3E-174;1.9E-174;5.4E-174;7.7E-174;7.7E-174;7.7E-174;7.7E-174;1.6E-173;3.1E-173;3.1E-173;3.1E-173;9.0E-173;9.0E-173;1.3E-172;1.3E-172;1.8E-172	MULTISPECIES: lipase family protein [Bacillus]	3.3e-175	240	240	1	240	100
MGYP000026120754	alpha/beta hydrolase	348	1.2E-84;2.4E-81;4.2E-76;2.6E-70;8.7E-69;1.3E-68;3.3E-67;5.8E-67;6.2E-67;1.2E-66;1.7E-66;1.9E-65;4.2E-65;9.6E-65;4.0E-64;4.0E-64;4.0E-64;5.9E-64;1.6E-63;3.0E-63	alpha/beta hydrolase [Pedobacter sp.]	1.2e-84	345	332	10	341	63.55
MGYP000026461266	alpha/beta fold hydrolase	438	1.4E-82;7.5E-81;1.1E-80;1.1E-79;9.7E-78;2.1E-77;9.3E-76;5.0E-75;3.7E-74;7.2E-73;1.1E-72;2.6E-72;2.8E-72;1.3E-71;1.6E-71;2.9E-71;3.2E-71;2.7E-70;3.5E-70;1.7E-69	alpha/beta fold hydrolase [Neptunomonas phycophila]	1.4e-82	418	403	28	428	59.06
MGYP000027919187	triacylglycerol lipase	258	1.2E-59;6.4E-59;9.1E-59;9.1E-59;1.4E-57;1.6E-57;2.1E-57;7.4E-57;3.0E-56;3.7E-56;3.9E-56;4.9E-56;7.4E-56;4.6E-55;1.2E-54;1.3E-54;1.6E-54;1.8E-54;1.9E-54;2.0E-54	triacylglycerol lipase [Geitlerinema sp. PCC 9228]	1.2e-59	209	190	67	256	68.95
MGYP000028112388	alpha/beta fold hydrolase	309	1.3E-26;5.7E-26;7.9E-26;2.2E-22;4.3E-21;5.9E-21;2.6E-20;5.3E-20;5.6E-20;6.5E-20;7.7E-20;7.7E-20;8.6E-20;9.5E-20;1.1E-19;1.3E-19;4.9E-19;9.1E-19;1.3E-18;1.7E-18	alpha/beta fold hydrolase [Parachlamydia sp. AcF125]	1.3e-26	261	194	117	302	55.67
MGYP000028771192	AcvB/VirJ family lysyl-phosphatidylglycerol hydrolase	246	5.9E-71;8.3E-71;4.0E-70;5.2E-58;7.6E-57;1.0E-53;1.8E-50;4.8E-50;6.8E-50;8.4E-50;8.9E-50;1.4E-49;2.0E-49;3.8E-49;3.8E-49;5.2E-49;1.4E-48;1.4E-48;1.4E-48;1.5E-48	AcvB/VirJ family lysyl-phosphatidylglycerol hydrolase [Ohtaekwangia sp.]	5.9e-71	475	242	2	238	65.29
MGYP000028979062	alpha/beta hydrolase	257	4.4E-104;2.9E-102;2.2E-87;1.5E-75;1.7E-66;3.1E-65;2.4E-64;3.8E-63;9.6E-61;2.9E-60;5.4E-60;3.0E-59;4.5E-59;8.5E-59;8.7E-59;1.7E-58;4.1E-58;5.0E-58;2.0E-57;2.9E-57	alpha/beta hydrolase [Sporichthya sp.]	4.4e-104	261	258	1	256	72.87
MGYP000029178962	alpha/beta fold hydrolase	208	1.7E-126;3.3E-126;6.7E-126;9.5E-126;1.7E-110;1.7E-110;1.2E-109;1.4E-109;4.5E-108;1.8E-107;3.7E-107;3.7E-107;5.2E-107;1.0E-106;4.0E-106;6.4E-106;8.2E-106;4.5E-105;1.2E-104;2.0E-104	alpha/beta fold hydrolase [Pseudomonas anguilliseptica]	1.7e-126	427	209	1	208	90.91
MGYP000029333126	alpha/beta hydrolase	361	3.1E-141;1.3E-121;1.1E-118;1.6E-118;1.0E-115;2.6E-115;4.0E-115;1.7E-114;1.6E-113;4.4E-113;8.8E-113;1.0E-111;1.4E-111;2.9E-111;5.8E-111;3.0E-110;1.5E-109;3.2E-109;3.2E-109;1.2E-108	alpha/beta hydrolase [Enterovirga sp.]	3.1e-141	364	366	1	361	76.78
MGYP000029453664	alpha/beta fold hydrolase	275	7.2E-135;2.7E-73;6.6E-72;1.8E-71;9.7E-70;3.7E-69;6.9E-69;7.3E-69;2.8E-68;2.8E-68;3.8E-68;5.1E-68;2.1E-67;3.4E-67;3.1E-66;2.8E-65;3.2E-65;3.8E-64;5.0E-64;9.4E-64	alpha/beta fold hydrolase [Pseudodesulfovibrio senegalensis]	7.2e-135	327	269	1	269	81.41
MGYP000029453720	alpha/beta hydrolase	633	0.0E0;5.1E-241;3.9E-238;1.4E-233;2.4E-224;8.6E-224;3.7E-214;3.0E-174;2.3E-165;3.0E-165;5.7E-164;1.6E-163;9.9E-161;1.2E-155;9.0E-155;4.4E-153;5.3E-149;6.0E-148;6.7E-147;3.6E-146	alpha/beta hydrolase [Desulfogranum mediterraneum]	0	641	641	1	633	83.46
MGYP000030913957	hypothetical protein	272	3.5E-79;9.2E-77;3.6E-66;1.5E-65;3.6E-63;5.0E-63;6.5E-61;3.7E-60;3.7E-60;7.3E-60;1.2E-58;2.3E-58;3.7E-57;1.1E-56;3.4E-52;9.7E-52;9.7E-52;1.4E-51;1.9E-48;1.5E-47	hypothetical protein [Streptomyces cellostaticus]	3.5e-79	278	274	1	267	67.15
MGYP000030918736	protease pro-enzyme activation domain-containing protein	266	1.1E-48;4.0E-48;4.7E-47;5.1E-45;3.6E-42;2.6E-41;6.8E-40;9.7E-39;2.7E-35;8.4E-35;1.5E-28;8.0E-28;1.1E-27;3.9E-26;7.5E-26;1.5E-25;2.1E-25;5.7E-25;2.5E-24;4.3E-24	protease pro-enzyme activation domain-containing protein [Methylocella tundrae]	1.1e-48	896	272	5	262	55.51
MGYP000031094841	triacylglycerol lipase	474	7.6E-251;2.0E-204;2.1E-204;2.4E-203;5.0E-200;2.1E-199;4.7E-198;1.3E-197;1.3E-197;2.7E-197;4.6E-195;2.0E-138;2.5E-113;5.0E-106;4.4E-105;1.3E-104;9.9E-104;1.6E-43;1.8E-43;5.9E-43	triacylglycerol lipase [Nannocystis sp.]	7.6e-251	468	476	1	474	86.76
MGYP000031647432	alpha/beta fold hydrolase	290	1.8E-111;3.7E-111;5.0E-111;1.5E-110;2.1E-110;3.0E-110;3.0E-110;2.8E-108;1.6E-107;4.9E-107;6.5E-107;1.1E-106;1.7E-65;2.1E-63;3.8E-63;1.5E-59;7.3E-58;9.8E-56;3.5E-55;7.4E-50	alpha/beta fold hydrolase [Limnobacter sp. P1]	1.8e-111	280	278	1	278	72.66
MGYP000034230895	proprotein convertase subtilisin/kexin type 5-like	191	1.8E-17;6.1E-17;1.5E-16	proprotein convertase subtilisin/kexin type 5-like [Dendronephthya gigantea]	1.8e-17	647	183	32	187	53.01
MGYP000034669742	hypothetical protein	325	1.3E-101;1.3E-51;1.9E-50;1.2E-45;8.1E-45;4.4E-44;1.5E-43;1.5E-41;2.1E-40;4.1E-40;9.7E-39;5.9E-36;5.7E-31;1.5E-28;1.4E-26;1.4E-26;1.4E-26;1.2E-25;1.3E-24;1.9E-23	hypothetical protein [Undibacterium terreum]	1.3e-101	324	323	6	322	66.25
MGYP000034911615	alpha/beta hydrolase	266	2.5E-45;2.0E-44;4.0E-44;3.1E-43;1.3E-36;5.8E-36;2.8E-33;4.0E-31;4.4E-31;5.5E-31;1.1E-30;3.1E-30;4.3E-30;6.1E-30;6.1E-30;1.6E-29;2.5E-29;2.0E-27;4.0E-27;1.1E-26	alpha/beta hydrolase [Saprospira sp. CCB-QB6]	2.5e-45	272	249	18	266	54.62
MGYP000036986310	triacylglycerol lipase	225	1.5E-82;2.2E-81;2.4E-81;3.1E-81;4.5E-78;2.6E-77;5.3E-77;7.3E-77;2.1E-76;2.5E-76;4.0E-76;4.3E-76;4.3E-76;8.3E-76;8.8E-76;1.2E-75;1.7E-75;1.7E-75;1.7E-75;1.7E-75	triacylglycerol lipase [uncultured Agitococcus sp.]	1.5e-82	308	225	2	225	72.89
MGYP000037770904	alpha/beta fold hydrolase	262	8.7E-188;8.6E-179;1.7E-178;3.5E-178;5.0E-178;7.1E-178;7.1E-178;1.4E-177;1.4E-177;1.4E-177;2.9E-177;2.9E-177;4.1E-177;5.4E-177;5.8E-177;8.3E-177;8.3E-177;1.1E-176;1.1E-176;1.7E-176	alpha/beta fold hydrolase [Alteromonas abrolhosensis]	8.7e-188	259	259	4	262	99.61
MGYP000038159016	alpha/beta fold hydrolase	283	7.4E-30;1.5E-29;2.0E-29;1.1E-28;3.2E-28;3.2E-28;3.4E-28;3.4E-28;4.1E-28;5.8E-28;6.1E-28;6.2E-28;8.4E-28;8.8E-28;8.9E-28;9.7E-28;1.4E-27;1.5E-27;1.7E-27;1.7E-27	alpha/beta fold hydrolase [Euzebya tangerina]	7.4e-30	317	204	80	281	56.37
MGYP000040308472	alpha/beta fold hydrolase	321	1.1E-66;1.7E-65;4.3E-56;5.2E-54;1.0E-53;2.1E-53;1.1E-49;8.1E-49;2.4E-48;6.0E-48;6.2E-48;1.2E-47;1.2E-47;1.8E-47;1.9E-47;3.1E-47;4.7E-47;4.9E-47;6.8E-47;6.8E-47	alpha/beta fold hydrolase [Sandaracinus amylolyticus]	1.1e-66	409	317	1	307	57.1
MGYP000040925205	alpha/beta fold hydrolase	234	8.1E-72;4.8E-71;4.7E-70;6.6E-70;3.4E-68;7.5E-68;1.4E-67;3.9E-67;7.6E-67;7.6E-67;1.6E-66;2.5E-66;6.3E-66;5.1E-65;6.0E-65;7.8E-65;8.8E-65;1.1E-64;2.1E-64;2.3E-64	alpha/beta fold hydrolase [Fulvivirga aurantia]	8.1e-72	230	222	7	228	68.47
MGYP000041221056	lipase family protein	273	2.4E-16;3.6E-16	lipase family protein [Luteolibacter flavescens]	2.4e-16	357	212	22	230	51.89
MGYP000041411492	Mbeg1-like protein [	320	1.1E-54;4.4E-50	Mbeg1-like protein [[Clostridium] methoxybenzovorans]	1.1e-54	603	310	11	316	56.13
MGYP000042880208	alpha/beta fold hydrolase	234	3.2E-59;5.1E-50;3.9E-42;4.0E-42;7.8E-30;1.1E-29;1.1E-29;4.4E-28;6.3E-27;4.4E-17;2.1E-16;9.7E-16	alpha/beta fold hydrolase [Estrella lausannensis]	3.2e-59	352	232	1	230	66.38
MGYP000042897626	alpha/beta hydrolase	282	3.9E-57;9.5E-57;9.5E-57;1.9E-56;6.2E-55;9.1E-55;1.2E-54;1.5E-54;2.1E-54;6.4E-54;1.0E-53;3.0E-48;7.5E-44;1.0E-34;2.2E-26;6.4E-23;7.1E-22;9.4E-22;9.4E-22;1.7E-21	alpha/beta hydrolase [Gemmatimonas sp.]	3.9e-57	280	265	20	277	59.62
MGYP000042950923	alpha/beta hydrolase	262	2.2E-104;2.4E-81;4.0E-81;1.2E-80;1.2E-80;2.6E-80;7.3E-80;2.1E-79;5.5E-79;1.1E-78;1.4E-78;2.1E-78;2.1E-78;2.2E-78;3.1E-78;3.1E-78;3.1E-78;4.3E-78;4.5E-78;6.1E-78	alpha/beta hydrolase [Candidatus Poriferisodalis multihospitum]	2.2e-104	276	260	10	261	73.46
MGYP000043720461	alpha/beta fold hydrolase	186	3.6E-30;6.7E-30;1.4E-29;3.0E-29;3.5E-29;3.6E-29;3.7E-29;3.8E-29;8.5E-29;9.5E-29;9.7E-29;9.9E-29;1.3E-28;1.3E-28;1.3E-28;1.5E-28;1.7E-28;1.7E-28;1.8E-28;1.8E-28	alpha/beta fold hydrolase [Streptomyces sp. Mut1]	3.6e-30	306	166	23	186	57.83
MGYP000043864673	alpha/beta fold hydrolase	320	1.9E-153;3.7E-153;1.9E-103;2.7E-103;2.7E-103;2.7E-103;3.9E-103;1.1E-102;1.5E-102;1.6E-102;1.6E-102;3.1E-102;4.4E-102;4.4E-102;1.3E-101;1.3E-101;1.3E-101;1.8E-101;1.8E-101;1.8E-101	alpha/beta fold hydrolase [Bermanella marisrubri]	1.9e-153	315	290	31	320	84.48
MGYP000044054677	alpha/beta hydrolase	259	7.6E-32;8.9E-32;8.9E-32;1.1E-29;1.2E-29;2.7E-29;5.1E-29;5.3E-29;5.7E-29;1.1E-28;2.0E-28;4.0E-28;4.7E-28;6.5E-28;1.5E-27;3.6E-27;4.2E-27;4.3E-27;6.2E-27;7.1E-27	alpha/beta hydrolase [Anaerobranca gottschalkii]	7.6e-32	262	262	1	256	53.05
MGYP000044167471	alpha/beta hydrolase	272	4.2E-75;9.9E-63;2.1E-62;1.9E-60;4.5E-54;1.2E-53;3.3E-53;1.5E-51;7.5E-51;4.6E-49;2.7E-47;4.1E-47;8.8E-47;4.3E-46;5.2E-46;6.3E-46;6.8E-46;8.7E-46;9.8E-46;1.3E-45	alpha/beta hydrolase [Zongyanglinia marina]	4.2e-75	267	262	10	271	63.74
MGYP000045814263	lipase	277	1.3E-197;9.6E-123;1.4E-86;1.1E-85;1.3E-84;1.8E-84;2.7E-84;1.1E-81;1.6E-81;2.1E-81;4.1E-81;4.2E-81;4.5E-81;1.5E-79;5.6E-79;8.6E-79;1.9E-78;3.5E-78;4.9E-78;6.2E-78	lipase [Gordonia sp. (in: high G+C Gram-positive bacteria)]	1.3e-197	266	265	13	277	100
MGYP000046330636	alpha/beta fold hydrolase	330	5.1E-77;3.1E-75;1.7E-72;5.3E-72;1.1E-71;1.8E-71;2.6E-71;5.7E-71;1.1E-70;4.6E-70;5.0E-70;6.3E-70;8.9E-70;1.7E-69;1.9E-69;1.9E-69;3.1E-69;4.9E-69;6.9E-69;6.9E-69	alpha/beta fold hydrolase [Patulibacter sp.]	5.1e-77	460	333	5	327	58.26
MGYP000047018667	proline iminopeptidase-family hydrolase	299	1.7E-170;1.7E-147;2.8E-141;4.9E-140;8.3E-138;8.5E-138;1.2E-135;5.2E-135;1.8E-134;6.9E-134;8.5E-134;2.4E-133;5.0E-132;7.0E-132;2.0E-131;2.9E-131;8.1E-131;1.6E-130;2.3E-130;1.2E-129	proline iminopeptidase-family hydrolase [Massilia cavernae]	1.7e-170	300	297	3	299	85.19
MGYP000047040126	alpha/beta fold hydrolase	196	6.0E-138;1.4E-59;2.2E-58;7.6E-55;1.5E-54;3.1E-54;6.2E-54;1.3E-53;1.6E-52;2.2E-52;7.0E-52;1.5E-48;3.0E-48;9.1E-48;1.2E-47;1.2E-47;1.4E-46;3.7E-46;1.5E-44;9.4E-43	alpha/beta fold hydrolase [Ketobacter sp. MCCC 1A13808]	6e-138	196	196	1	196	100
MGYP000048628194	alpha/beta hydrolase	268	7.0E-124;1.2E-122;4.7E-122;5.3E-119;1.6E-109;1.2E-108;1.3E-108;8.9E-107;1.1E-106;1.5E-106;2.5E-106;5.4E-106;1.2E-105;1.3E-105;1.9E-104;4.2E-104;1.1E-103;1.2E-103;1.4E-103;1.4E-103	alpha/beta hydrolase [Cystobacter fuscus]	7e-124	267	267	1	267	78.65
MGYP000049654800	alpha/beta hydrolase	280	3.8E-24;5.3E-24;1.0E-23;1.5E-23;2.9E-23;5.7E-23;3.0E-22;4.4E-22;1.1E-21;1.5E-21;2.0E-21;4.7E-21;5.5E-21;5.8E-21;7.7E-21;8.1E-21;8.9E-21;1.1E-20;1.6E-20;2.0E-20	alpha/beta hydrolase [Roseibium album]	3.8e-24	278	263	15	274	53.61
MGYP000049765531	alpha/beta hydrolase	261	1.2E-183;1.0E-175;4.4E-172;9.1E-165;9.4E-163;6.4E-143;2.6E-138;4.1E-136;4.4E-136;3.1E-135;1.1E-115;3.8E-63;3.8E-63;2.2E-61;2.1E-56;8.1E-51;8.8E-51;1.5E-49;9.3E-47;1.8E-46	alpha/beta hydrolase [Cecembia lonarensis]	1.2e-183	261	260	1	260	98.46
MGYP000049772958	alpha/beta hydrolase	268	1.4E-83;4.1E-83;4.1E-83;6.8E-83;9.3E-83;9.6E-83;1.6E-82;1.6E-82;2.3E-81;3.8E-81;1.9E-79;9.2E-79;1.0E-77;1.5E-77;1.5E-77;3.3E-77;1.1E-76;5.9E-75;6.3E-75;7.4E-75	alpha/beta hydrolase [Thalassolituus sp. ST750PaO-4]	1.4e-83	261	257	6	262	68.87
MGYP000051335407	alpha/beta fold hydrolase	177	2.0E-32;1.6E-31;5.1E-30;5.2E-30;6.3E-30;7.4E-30;7.7E-30;8.9E-30;1.0E-29;1.4E-29;1.7E-29;2.0E-29;2.4E-29;2.4E-29;2.4E-29;2.4E-29;2.4E-29;2.4E-29;2.4E-29;2.4E-29	alpha/beta fold hydrolase [Ruminococcus sp. Marseille-P6503]	2e-32	317	89	1	89	83.15
MGYP000051488463	alpha/beta hydrolase	340	3.6E-62;1.3E-60;5.7E-59;8.7E-58;7.1E-57;3.2E-56;5.7E-56;3.5E-55;4.9E-55;6.0E-55;7.3E-55;7.5E-55;8.7E-55;9.2E-55;9.6E-55;1.1E-54;1.5E-54;1.6E-54;2.7E-54;3.0E-54	alpha/beta hydrolase [Desulfogranum mediterraneum]	3.6e-62	417	330	3	328	56.67
MGYP000051582635	alpha/beta fold hydrolase	346	4.0E-90;6.1E-90;2.4E-88;7.9E-87;4.9E-86;6.8E-86;1.0E-85;1.2E-85;1.3E-83;4.4E-83;1.2E-81;1.2E-81;6.6E-81;2.3E-80;2.5E-79;2.6E-79;6.0E-79;9.9E-79;6.0E-78;6.2E-78	alpha/beta fold hydrolase [Actinocrinis sp.]	4e-90	378	278	69	346	67.63
MGYP000051721244	lipase family protein	328	1.1E-140;5.2E-139;7.4E-139;3.4E-97;6.9E-97;3.6E-93;4.9E-92;9.3E-92;4.8E-91;1.1E-90;2.7E-90;1.0E-89;1.7E-89;1.8E-89;6.8E-89;7.2E-88;3.1E-87;3.6E-87;4.2E-87;1.1E-86	lipase family protein [Cellvibrio sp. QJXJ]	1.1e-140	387	328	1	328	75.3
MGYP000051736421	AMP-binding protein	272	4.7E-46;8.8E-45;1.8E-42;1.0E-18	AMP-binding protein [Reyranella sp.]	4.7e-46	853	264	8	266	57.2
MGYP000052722128	alpha/beta fold hydrolase	278	8.6E-190;2.8E-179;4.0E-179;1.4E-177;3.7E-175;2.9E-172;1.7E-171;1.6E-169;8.2E-163;7.7E-161;1.8E-152;5.3E-152;3.0E-151;5.0E-150;2.0E-149;2.8E-140;6.0E-140;2.8E-136;3.5E-134;4.1E-133	alpha/beta fold hydrolase [Arthrobacter sp. NicSoilB4]	8.6e-190	278	278	1	278	95.68
MGYP000052768859	MULTISPECIES: triacylglycerol lipase	333	4.0E-213;5.7E-213;1.2E-212;1.6E-212;1.6E-212;2.3E-212;2.3E-212;2.3E-212;2.3E-212;2.3E-212;3.3E-212;3.3E-212;3.3E-212;4.7E-212;4.7E-212;4.7E-212;6.7E-212;6.7E-212;9.5E-212;9.5E-212	MULTISPECIES: triacylglycerol lipase [Aeromonas]	4e-213	303	303	31	333	99.67
MGYP000052956413	uncharacterized protein PGUG_00004	191	6.7E-118;8.4E-86;1.2E-82;1.7E-65;5.3E-64;2.1E-63;2.7E-63;4.1E-62;1.8E-61;1.9E-61;3.0E-61;3.0E-61;4.5E-61;8.7E-61;3.1E-60;3.2E-60;4.3E-60;9.3E-60;2.5E-59;4.9E-59	uncharacterized protein PGUG_00004 [Meyerozyma guilliermondii ATCC 6260]	6.7e-118	457	191	1	191	93.72
MGYP000054365930	alpha/beta fold hydrolase	208	8.3E-49;1.0E-48;1.1E-48;1.2E-47;2.7E-47;1.0E-46;1.0E-46;1.4E-46;1.5E-46;1.5E-46;2.0E-46;2.5E-46;2.7E-46;3.7E-46;4.0E-46;4.0E-46;4.0E-46;8.1E-46;9.1E-46;1.1E-45	alpha/beta fold hydrolase [Rugamonas rubra]	8.3e-49	328	193	22	205	62.69
MGYP000055267509	triacylglycerol lipase	294	1.6E-104;2.5E-101;1.2E-100;4.9E-100;2.9E-95;5.9E-95;6.1E-95;8.3E-95;8.3E-95;1.2E-94;1.7E-94;2.4E-94;2.4E-94;3.4E-94;4.8E-94;4.9E-94;7.0E-94;9.6E-94;1.3E-93;1.9E-93	triacylglycerol lipase [Isoalcanivorax indicus]	1.6e-104	293	281	1	280	71.53
MGYP000055429694	alpha/beta hydrolase	271	7.3E-50;2.5E-48;1.9E-47;8.0E-47;2.5E-46;2.9E-46;3.4E-46;4.4E-46;4.4E-46;7.3E-46;8.6E-46;8.7E-46;1.4E-45;1.6E-45;1.8E-45;6.0E-45;6.9E-45;6.9E-45;9.2E-45;1.9E-44	alpha/beta hydrolase [Bacillus sp. M6-12]	7.3e-50	262	252	14	264	63.1
MGYP000055549248	alpha/beta fold hydrolase	269	1.1E-88;1.6E-66;2.2E-66;8.9E-66;1.3E-65;1.4E-64;1.8E-62;2.9E-50;4.8E-50;1.7E-49;2.6E-49;5.4E-49;5.7E-49;6.8E-49;1.8E-48;1.9E-48;1.9E-48;2.8E-48;2.9E-48;3.7E-48	alpha/beta fold hydrolase [Cyanobium sp. CH-040]	1.1e-88	262	261	1	261	67.82
MGYP000057623990	alpha/beta fold hydrolase	196	2.5E-70;1.0E-69;1.1E-66;1.1E-66;1.8E-65;3.6E-65;4.8E-63;1.7E-46;1.8E-43;2.0E-42;2.9E-42;3.7E-42;5.1E-40;5.9E-40;7.6E-40;3.0E-39;3.3E-39;6.9E-39;2.5E-38;3.1E-38	alpha/beta fold hydrolase [Rhodoluna limnophila]	2.5e-70	196	195	4	196	71.79
MGYP000058186879	lipase family protein	243	3.9E-32;5.4E-32;7.1E-32;4.7E-31;2.7E-30;1.1E-29;2.0E-29;3.0E-29;4.9E-29;8.8E-29;1.1E-28;2.9E-28;3.3E-28;1.1E-27;1.5E-27;1.6E-27;2.2E-27;2.9E-27;6.1E-27;9.7E-27	lipase family protein [Cocleimonas flava]	3.9e-32	282	215	37	237	52.56
MGYP000058903877	alpha/beta-hydrolase	200	2.9E-33;9.8E-33;2.8E-32;7.1E-32;2.6E-31;4.2E-31;7.7E-31;9.6E-31;1.2E-30;2.1E-30;3.2E-30;4.5E-30;1.4E-29;1.4E-29;4.9E-29;6.5E-29;7.7E-29;1.1E-28;2.2E-28;2.6E-28	alpha/beta-hydrolase [Cryphonectria parasitica EP155]	2.9e-33	333	194	2	194	52.06
MGYP000063477997	Mbeg1-like protein	204	2.0E-126;8.1E-126;1.1E-125;9.3E-120;2.0E-119;9.4E-118;3.8E-117;3.8E-117;5.9E-116;5.9E-116;8.0E-109;5.3E-107;1.7E-106;2.5E-101;2.4E-99;3.1E-87;6.1E-70;9.5E-70;1.2E-69;3.8E-69	Mbeg1-like protein [Acetobacterium sp.]	2e-126	282	203	2	204	91.63
MGYP000064495345	uncharacterized protein LOC131883499 isoform X2	164	9.7E-23;1.0E-22;2.0E-21;4.0E-17;5.7E-17;5.7E-17;5.7E-17;5.7E-17;6.9E-17;6.9E-17;2.4E-16;2.4E-16;3.1E-16;4.4E-16;4.4E-16;4.4E-16;4.4E-16;4.4E-16;4.4E-16;6.0E-16	uncharacterized protein LOC131883499 isoform X2 [Tigriopus californicus]	9.7e-23	561	155	5	156	58.71
MGYP000064815674	dienelactone hydrolase family protein	211	5.4E-58;1.9E-53;7.0E-53;1.1E-51;9.7E-51;6.1E-50;8.6E-50;2.0E-49;2.3E-49;4.2E-49;1.1E-48;1.1E-48;2.5E-48;4.8E-48;6.6E-48;6.6E-48;8.1E-48;8.8E-48;9.3E-48;9.6E-48	dienelactone hydrolase family protein [Parvicella tangerina]	5.4e-58	215	211	1	209	65.4
MGYP000064992516	alpha/beta fold hydrolase	329	1.3E-216;1.3E-209;1.0E-207;1.0E-207;2.9E-207;2.8E-206;2.0E-205;1.9E-204;6.9E-204;5.4E-200;5.4E-200;2.2E-188;8.0E-183;6.3E-165;8.4E-162	alpha/beta fold hydrolase [uncultured Corynebacterium sp.]	1.3e-216	326	299	4	302	100
MGYP000065113669	lipase family protein	286	5.7E-135;2.0E-21;1.4E-19;1.4E-19;8.7E-19;4.9E-18;9.4E-18;2.5E-17;2.3E-16;4.3E-16;4.3E-16	lipase family protein [Psychroserpens luteus]	5.7e-135	288	287	1	285	78.4
MGYP000066298016	alpha-beta hydrolase fold protein	423	1.3E-218;7.6E-16	alpha-beta hydrolase fold protein [Fadolivirus algeromassiliense]	1.3e-218	434	423	1	422	84.63
MGYP000067321685	hypothetical protein	351	8.6E-76;3.5E-68;2.0E-67;7.5E-67;3.2E-59;1.6E-57;2.5E-56;6.1E-55;1.6E-54;1.4E-52;1.9E-52;9.4E-51;1.5E-50;1.0E-49;2.3E-49;4.4E-49;6.2E-49;8.8E-49;8.8E-49;1.1E-48	hypothetical protein [Gordonia asplenii]	8.6e-76	330	319	37	347	57.05
MGYP000069296941	alpha/beta fold hydrolase	310	2.2E-53;7.6E-50;2.3E-48;3.3E-48;5.5E-48;1.4E-46;1.5E-46;1.9E-46;2.2E-46;2.7E-46;3.9E-46;4.3E-46;5.5E-46;7.7E-46;1.3E-45;1.5E-45;2.2E-45;2.2E-45;3.0E-45;3.0E-45	alpha/beta fold hydrolase [Janthinobacterium sp.]	2.2e-53	310	300	5	296	55
MGYP000070268195	proline iminopeptidase-family hydrolase	270	2.1E-54;8.2E-54;2.3E-53;3.3E-53;6.2E-53;1.2E-52;1.2E-52;2.7E-52;5.4E-52;7.6E-52;1.9E-51;2.1E-51;2.1E-51;2.6E-51;3.9E-51;3.9E-51;4.1E-51;8.0E-51;1.1E-50;1.6E-50	proline iminopeptidase-family hydrolase [Roseovarius sp. Pro17]	2.1e-54	296	256	14	268	57.03
MGYP000070605972	alpha/beta hydrolase	260	9.0E-54;1.3E-37;2.4E-36;3.4E-35;1.2E-34;1.2E-34;1.6E-34;1.7E-34;2.4E-34;3.2E-34;4.2E-34;6.8E-34;6.8E-34;9.5E-34;9.5E-34;1.3E-33;1.3E-33;1.3E-33;1.4E-33;1.9E-33	alpha/beta hydrolase [Candidatus Methanodesulfokores washburnensis]	9e-54	274	275	1	255	62.55
MGYP000072158145	esterase/lipase, partial	320	3.1E-20;5.8E-18;4.0E-17;5.6E-17;1.2E-16;5.2E-16;5.2E-16;8.3E-16;8.5E-16	esterase/lipase, partial [Cedratvirus A11]	3.1e-20	312	194	136	313	51.55
MGYP000072224334	alpha/beta hydrolase	326	3.8E-81;7.8E-59;4.2E-58;5.6E-58;1.7E-41;1.7E-41;6.7E-41;4.5E-40;1.9E-39;2.5E-39;5.5E-39;6.8E-39;1.9E-38;7.1E-38;1.5E-37;2.9E-37;1.9E-36;2.7E-36;5.7E-36;9.0E-36	alpha/beta hydrolase [Leptospirillum ferrooxidans]	3.8e-81	328	315	3	308	62.86
MGYP000072872183	alpha/beta fold hydrolase	259	8.1E-90;6.9E-86;1.0E-84;1.4E-82;1.4E-82;3.7E-82;5.6E-82;7.6E-82;1.0E-81;1.5E-81;4.5E-81;6.6E-81;9.4E-81;1.0E-80;1.2E-80;1.3E-80;1.8E-80;1.9E-80;2.6E-80;3.4E-80	alpha/beta fold hydrolase [Pedosphaera parvula]	8.1e-90	269	252	5	256	67.86
MGYP000072934568	alpha/beta hydrolase	296	5.3E-31;1.4E-30;1.2E-29;1.4E-28;2.4E-28;6.1E-28;1.3E-27;3.3E-27;7.5E-27;1.1E-26;1.3E-26;1.6E-26;2.2E-26;3.4E-26;4.5E-26;5.4E-26;5.5E-26;8.0E-26;8.8E-26;8.8E-26	alpha/beta hydrolase [Gimesia aquarii]	5.3e-31	288	288	14	294	50.69
MGYP000073172038	triacylglycerol lipase	445	2.6E-224;2.6E-223;3.7E-223;3.7E-223;1.5E-222;3.3E-222;1.3E-221;4.2E-220;6.0E-220;1.6E-219;4.0E-219;5.6E-216;8.3E-216;1.1E-215;2.2E-215;2.3E-215;2.4E-215;3.6E-215;7.3E-215;1.1E-214	triacylglycerol lipase [uncultured Dysosmobacter sp.]	2.6e-224	436	444	3	445	82.21
MGYP000073372450	alpha/beta fold hydrolase	288	4.1E-111;1.7E-103;1.9E-102;4.1E-102;4.4E-101;1.4E-99;2.8E-99;3.4E-98;4.9E-98;4.9E-98;1.6E-97;2.9E-97;4.6E-97;4.6E-97;5.3E-96;4.7E-95;5.6E-94;6.3E-94;1.4E-93;3.0E-93	alpha/beta fold hydrolase [Sinimarinibacterium flocculans]	4.1e-111	337	301	1	282	69.77
MGYP000073380411	alpha/beta hydrolase	298	3.9E-56;4.9E-44;8.7E-39;1.1E-38;8.1E-38;4.5E-37;8.8E-37;6.3E-35;4.9E-34;7.1E-34;1.3E-33;2.0E-33;2.3E-33;2.6E-33;3.3E-33;3.7E-33;4.2E-33;4.6E-33;6.2E-33;6.5E-33	alpha/beta hydrolase [Sedimentibacter sp. zth1]	3.9e-56	294	296	1	291	58.78
MGYP000073461717	hypothetical protein PPTG_08907	273	2.7E-35;6.4E-33;1.7E-31;4.4E-30;4.9E-30;8.6E-30;9.4E-30;5.2E-29;5.6E-29;1.1E-28;3.2E-28;4.1E-28;1.1E-27;3.8E-27;6.8E-27;7.4E-27;8.0E-27;1.1E-26;2.6E-26;6.8E-26	hypothetical protein PPTG_08907 [Phytophthora nicotianae INRA-310]	2.7e-35	312	253	24	265	52.57
MGYP000076258254	predicted protein	293	5.3E-35;1.2E-31;6.0E-31;6.2E-17	predicted protein [Thalassiosira pseudonana CCMP1335]	5.3e-35	1888	223	4	225	52.47
MGYP000076510101	alpha/beta fold hydrolase	176	1.8E-45;1.8E-45;2.2E-45;2.5E-45;1.7E-42;2.0E-42;1.4E-41;2.3E-41;4.1E-41;5.4E-41;1.1E-40;1.4E-40;2.1E-40;2.6E-40;5.6E-40;5.6E-40;8.5E-40;9.5E-40;1.0E-39;2.0E-39	alpha/beta fold hydrolase [Zhongshania aliphaticivorans]	1.8e-45	351	178	5	176	62.36
MGYP000076527388	lipase (class 3) domain-containing protein	203	1.3E-128;2.7E-75;4.0E-20;2.0E-19;2.0E-18;2.1E-18;6.3E-17;1.3E-16;2.1E-16;7.0E-16	lipase (class 3) domain-containing protein [Purpureocillium lilacinum]	1.3e-128	478	203	1	203	97.54
MGYP000077103695	alpha/beta fold hydrolase	268	1.2E-109;1.1E-91;2.1E-89;1.1E-87;4.0E-87;5.9E-86;8.4E-86;8.9E-86;9.5E-86;2.5E-85;3.6E-85;5.1E-85;1.8E-84;1.6E-83;4.2E-83;1.7E-82;2.8E-82;3.0E-82;9.6E-82;8.9E-81	alpha/beta fold hydrolase [Aciditerrimonas ferrireducens]	1.2e-109	304	267	1	266	76.4
MGYP000079417998	lipase family protein	279	6.3E-33;1.0E-28;8.6E-27;3.8E-26;5.1E-26;7.3E-26;1.0E-25;1.0E-25;1.0E-25;1.0E-25;1.0E-25;1.8E-25;2.0E-25;2.6E-25;3.9E-25;4.4E-25;5.4E-25;5.4E-25;1.0E-24;1.2E-24	lipase family protein [Tetrahymena thermophila SB210]	6.3e-33	277	213	60	265	55.87
MGYP000079689771	alpha/beta hydrolase	261	1.2E-176;2.9E-175;3.4E-174;1.4E-173;1.6E-172;4.9E-169;5.6E-162;6.9E-151;7.1E-149;4.6E-133;6.5E-133;1.9E-132;3.7E-132;2.2E-131;3.6E-60;7.2E-60;9.3E-60;1.9E-59;3.7E-59;5.6E-56	alpha/beta hydrolase [Clostridium sp. MCC328]	1.2e-176	261	261	1	261	96.93
MGYP000084052812	lipase	392	5.1e-64	lipase [Trichomonas vaginalis G3]	5.1e-64	377	373	6	370	56.3
MGYP000084137841	alpha/beta hydrolase	281	6.6E-191;5.7E-179;2.6E-175;3.4E-152;2.4E-92;9.2E-89;1.3E-87;1.4E-87;8.7E-87;1.0E-86;1.5E-86;8.5E-86;1.8E-84;3.7E-84;3.9E-84;5.6E-84;7.9E-84;5.8E-83;6.4E-83;8.8E-83	alpha/beta hydrolase [Holospora undulata]	6.6e-191	281	281	1	281	96.09
MGYP000084622667	alpha/beta hydrolase	285	5.5E-103;4.8E-99;1.4E-98;3.1E-93;4.9E-91;5.6E-90;2.9E-88;4.1E-88;1.2E-87;1.2E-87;4.1E-75;7.2E-74;7.5E-72;2.4E-43;9.0E-43;5.0E-42;6.8E-42;7.0E-42;1.4E-41;1.4E-41	alpha/beta hydrolase [Anaerovorax odorimutans]	5.5e-103	284	278	1	278	70.5
MGYP000084725637	triacylglycerol lipase	308	9.6E-145;1.9E-90;1.7E-88;1.8E-88;3.8E-88;2.6E-87;2.7E-87;3.1E-87;3.2E-87;3.3E-87;3.3E-87;4.1E-87;4.8E-87;4.9E-87;6.3E-87;6.6E-87;6.8E-87;7.0E-87;7.2E-87;8.9E-87	triacylglycerol lipase [Alkalimarinus coralli]	9.6e-145	311	311	1	308	80.06
MGYP000085149118	triacylglycerol lipase	318	1.8E-218;1.0E-190;4.3E-157;1.9E-156;8.6E-118;2.3E-115;2.0E-114;1.4E-112;5.6E-112;1.1E-111;1.1E-111;1.6E-110;1.6E-110;2.3E-110;3.4E-110;3.3E-109;3.5E-109;5.2E-109;1.0E-108;1.5E-108	triacylglycerol lipase [Isoalcanivorax indicus]	1.8e-218	318	318	1	318	97.17
MGYP000085149782	alpha/beta hydrolase	284	5.8E-69;2.4E-46;3.1E-46;6.4E-33;7.3E-33;8.0E-33;2.2E-32;5.7E-32;1.1E-31;1.5E-31;1.6E-30;4.1E-29;3.3E-26;4.7E-26;9.1E-26;9.2E-25;1.7E-24;1.3E-21;1.3E-21;1.8E-21	alpha/beta hydrolase [Phototrophicus methaneseepsis]	5.8e-69	283	282	1	282	60.28
MGYP000085158039	alpha/beta fold hydrolase	266	9.1E-79;3.6E-72;2.8E-68;4.8E-68;6.2E-68;1.2E-67;1.8E-67;1.8E-67;5.0E-67;5.0E-67;7.0E-67;9.3E-67;9.9E-67;9.9E-67;1.4E-66;2.0E-66;2.5E-66;2.8E-66;2.8E-66;2.8E-66	alpha/beta fold hydrolase [Sinimarinibacterium sp. CAU 1509]	9.1e-79	271	248	11	256	69.76
MGYP000085390284	alpha/beta hydrolase	273	6.8E-187;3.5E-174;5.9E-174;2.5E-173;1.0E-172;1.4E-172;5.9E-172;6.2E-172;2.4E-171;8.6E-170;3.4E-162;8.4E-162;1.1E-161;2.6E-160;3.7E-160;1.5E-159;1.7E-157;1.3E-152;1.9E-152;1.8E-151	alpha/beta hydrolase [Mycolicibacterium rutilum]	6.8e-187	274	273	1	273	98.17
MGYP000085441816	alpha/beta hydrolase	270	7.5E-109;1.3E-86;8.5E-78;1.6E-77;2.7E-77;3.8E-77;4.4E-77;5.3E-77;6.9E-77;9.7E-77;2.1E-76;2.1E-76;3.0E-76;3.0E-76;8.7E-76;3.0E-75;5.1E-74;5.8E-74;1.0E-73;2.7E-73	alpha/beta hydrolase [Glaciecola sp. HTCC2999]	7.5e-109	336	265	6	269	74.72
MGYP000087087364	alpha/beta hydrolase	316	4.4E-90;1.3E-89;1.8E-89;3.2E-89;3.2E-89;8.9E-89;2.6E-88;3.5E-88;3.6E-88;3.4E-87;4.0E-87;1.8E-86;6.0E-86;6.8E-86;7.0E-86;8.2E-86;1.2E-85;1.3E-85;1.7E-85;2.4E-85	alpha/beta hydrolase [Actinomadura rupiterrae]	4.4e-90	337	320	1	315	63.44
MGYP000087208247	lipase family protein	231	8.3E-123;2.1E-118;1.4E-116;4.8E-116;8.2E-116;7.9E-115;9.5E-115;1.1E-113;4.4E-113;2.4E-112;1.3E-111;1.6E-110;9.0E-110;1.3E-109;1.3E-109;2.8E-109;5.2E-109;5.2E-109;7.3E-109;1.0E-108	lipase family protein [Colwellia sp. E2M01]	8.3e-123	382	204	15	218	92.16
MGYP000087955828	lipase	221	2.2E-81;8.7E-81;1.0E-79;5.6E-79;1.6E-78;4.9E-78;1.9E-77;3.9E-77;4.3E-77;9.5E-77;1.6E-76;2.3E-76;3.4E-76;2.7E-75;5.0E-75;1.5E-74;1.5E-74;1.7E-74;3.2E-74;4.3E-74	lipase [Pseudonocardia dioxanivorans]	2.2e-81	265	219	1	219	72.6
MGYP000087993251	alpha/beta hydrolase	331	1.7E-227;4.3E-196;2.8E-194;3.3E-193;9.4E-193;1.5E-189;1.7E-188;2.1E-186;4.9E-179;2.7E-178;3.2E-175;2.2E-160;7.9E-152;4.6E-151;9.2E-151;5.3E-150;7.1E-148;1.5E-142;1.5E-142;9.6E-136	alpha/beta hydrolase [Phaeobacter sp. 11ANDIMAR09]	1.7e-227	331	331	1	331	98.79
MGYP000088323116	alpha/beta hydrolase	364	1.4E-163;5.3E-107;9.5E-104;2.8E-103;3.9E-103;7.9E-103;2.2E-102;6.4E-102;1.7E-99;1.7E-99;1.5E-79;2.9E-58;1.3E-56;3.9E-55;1.0E-54;4.0E-54;4.4E-54;5.6E-54;6.9E-54;7.9E-54	alpha/beta hydrolase [Oricola indica]	1.4e-163	360	348	12	358	78.45
MGYP000090096963	lipase family protein	257	4.0E-79;4.0E-79;1.5E-76;8.5E-76;8.1E-74;2.5E-60;8.1E-55;2.7E-54;3.6E-53;4.5E-50;5.3E-50;2.1E-49;4.1E-49;5.7E-49;5.9E-49;8.3E-49;5.0E-48;9.0E-48;1.8E-47;2.1E-47	lipase family protein [Aquidulcibacter sp.]	4e-79	288	249	7	255	67.87
MGYP000090256331	lipase family protein	225	2.3E-29;1.1E-28;3.3E-28;3.5E-27;7.0E-27;1.4E-26;1.8E-26;2.8E-26;5.5E-26;2.1E-24;5.7E-24;8.0E-24;8.9E-24;4.2E-23;8.3E-23;1.2E-22;2.3E-22;6.9E-22;1.1E-21;1.3E-21	lipase family protein [Nostoc sp. TCL26-01]	2.3e-29	257	252	1	214	50.79
MGYP000090521377	alpha/beta fold hydrolase	213	2.9E-81;4.9E-68;1.1E-67;1.6E-64;7.2E-63;1.4E-62;4.9E-62;9.6E-62;1.1E-61;1.4E-61;2.1E-61;3.9E-61;3.9E-61;3.9E-61;5.5E-61;6.5E-61;1.5E-60;1.7E-60;2.2E-60;3.5E-60	alpha/beta fold hydrolase [Pyrinomonas methylaliphatogenes]	2.9e-81	262	212	1	212	77.83
MGYP000091247806	alpha/beta hydrolase	282	1.7E-50;9.2E-49;2.1E-43;2.1E-43;3.0E-43;4.1E-43;9.4E-43;1.8E-42;4.5E-42;8.5E-42;1.2E-40;8.4E-40;1.6E-39;2.1E-38;7.6E-36;8.1E-35;2.7E-34;4.2E-31;9.1E-30;1.4E-24	alpha/beta hydrolase [Phototrophicus methaneseepsis]	1.7e-50	283	283	3	281	58.3
MGYP000091365696	tetratricopeptide repeat protein	188	2e-44	tetratricopeptide repeat protein [Candidatus Solincola tengchongensis]	2e-44	410	167	1	163	69.46
MGYP000092967336	alpha/beta fold hydrolase	319	2.7E-218;1.3E-152;4.0E-152;7.6E-152;3.6E-148;1.4E-138;1.3E-134;3.0E-133;9.4E-128;4.8E-126;1.6E-119;1.5E-115;3.0E-109;4.9E-105;9.5E-105;3.9E-104;3.6E-102;1.2E-91;1.2E-91;1.2E-91	alpha/beta fold hydrolase [Zoogloea sp.]	2.7e-218	319	319	1	319	97.81
MGYP000093520983	alpha/beta fold hydrolase	253	1.7E-110;2.2E-106;4.1E-97;1.6E-96;1.9E-95;1.9E-95;1.1E-94;3.0E-94;3.0E-94;6.3E-94;6.3E-94;9.0E-94;9.0E-94;2.5E-93;2.5E-93;2.5E-93;2.6E-93;3.5E-93;5.3E-93;7.1E-93	alpha/beta fold hydrolase [Flavobacterium sp. CS20]	1.7e-110	254	253	2	253	78.66
MGYP000093527786	lipase family protein	358	1.5E-53;2.8E-41;6.5E-36;5.6E-33;3.2E-32;4.8E-32;9.4E-32;6.7E-31;7.8E-31;1.0E-29;8.1E-29;3.1E-28;3.3E-27;4.0E-26;4.7E-26;5.1E-26;6.4E-26;1.2E-25;1.8E-25;2.8E-25	lipase family protein [Streptomyces sp. SA15]	1.5e-53	343	314	47	347	52.55
MGYP000093612133	prolyl aminopeptidase	318	7.8E-111;7.6E-110;1.1E-109;2.2E-109;1.2E-108;5.0E-108;4.6E-107;6.3E-105;1.3E-104;5.1E-104;4.7E-103;9.6E-102;1.4E-101;1.3E-99;1.8E-99;5.1E-99;1.3E-98;1.5E-98;6.7E-98;7.9E-98	prolyl aminopeptidase [Methyloversatilis discipulorum]	7.8e-111	323	314	7	314	64.97
MGYP000094199270	alpha/beta fold hydrolase	292	3.6E-141;2.0E-125;1.6E-122;2.6E-106;1.0E-91;7.7E-91;1.1E-90;1.2E-90;1.6E-90;9.5E-90;1.9E-89;1.9E-89;2.2E-88;5.3E-88;1.8E-87;3.4E-87;4.6E-87;1.6E-86;2.0E-86;2.3E-85	alpha/beta fold hydrolase [Rubrobacter marinus]	3.6e-141	284	271	18	287	80.81
MGYP000095651737	alpha/beta hydrolase	275	4.1E-128;8.6E-126;1.8E-125;2.6E-125;5.1E-122;2.1E-121;4.7E-121;1.1E-108;3.1E-108;1.5E-106;3.5E-106;1.4E-105;1.7E-105;3.4E-105;4.0E-105;7.8E-105;1.1E-104;2.1E-104;2.2E-104;2.9E-104	alpha/beta hydrolase [Oscillochloris sp. ZM17-4]	4.1e-128	271	269	6	274	76.95
MGYP000095920467	alpha/beta fold hydrolase	440	2.5E-179;6.5E-178;2.4E-172;2.0E-168;4.2E-140;5.9E-140;1.2E-139;3.0E-130;1.3E-113;7.1E-99;7.6E-99;4.3E-94;1.8E-92;9.8E-81;9.8E-81;5.4E-80;1.1E-79;5.1E-79;5.2E-79;7.1E-79	alpha/beta fold hydrolase [Azonexus hydrophilus]	2.5e-179	421	410	15	424	76.34
MGYP000096557371	alpha/beta hydrolase	268	4.3E-196;1.8E-195;2.5E-195;5.1E-195;2.1E-194;2.9E-194;2.3E-71;2.8E-66;1.7E-65;3.7E-65;5.5E-64;7.8E-64;3.0E-63;4.3E-63;4.4E-63;4.4E-63;8.9E-63;1.5E-62;1.9E-62;2.5E-62	alpha/beta hydrolase [Moraxella osloensis]	4.3e-196	267	267	2	268	100
MGYP000097281883	uncharacterized protein TERG_01649	324	3.4E-246;3.5E-239;3.6E-237;7.1E-206;6.2E-196;3.9E-149;2.0E-99;2.6E-99;4.0E-99;8.1E-99;5.6E-98;3.5E-96;5.6E-96;7.6E-96;7.7E-96;2.8E-95;1.3E-94;1.7E-94;1.7E-94;1.8E-94	uncharacterized protein TERG_01649 [Trichophyton rubrum CBS 118892]	3.4e-246	407	317	8	324	100
MGYP000098731867	alpha/beta fold hydrolase	252	8.4E-120;2.8E-118;2.5E-114;1.1E-110;3.5E-107;1.0E-106;2.4E-106;2.5E-104;4.8E-104;6.8E-104;1.8E-101;3.0E-100;3.5E-99;1.4E-98;2.4E-93;1.6E-91;3.6E-90;3.7E-90;1.8E-88;2.4E-88	alpha/beta fold hydrolase [Chryseosolibacter histidini]	8.4e-120	253	251	1	251	81.67
MGYP000098992874	lipase family protein	310	1.8E-39;9.9E-36;7.5E-35;9.6E-34;6.3E-33;8.1E-33;5.2E-32;2.8E-30;1.6E-23;1.6E-22;9.8E-22;7.6E-19;8.9E-18;4.4E-16;4.4E-16;4.4E-16	lipase family protein [Chitiniphilus purpureus]	1.8e-39	293	286	5	289	52.1
MGYP000099839542	acetoin dehydrogenase dihydrolipoyllysine-residue acetyltransferase subunit	257	3.8E-69;4.1E-68;8.6E-68;8.8E-68;1.6E-67;3.4E-67;4.9E-67;5.7E-67;9.8E-67;1.3E-66;1.8E-66;2.3E-66;3.2E-66;3.2E-66;3.9E-66;4.6E-66;5.5E-66;7.9E-66;9.1E-66;1.3E-65	acetoin dehydrogenase dihydrolipoyllysine-residue acetyltransferase subunit [Bosea sp. 117]	3.8e-69	371	180	77	256	76.67
MGYP000099845918	alpha/beta fold hydrolase	237	5.9E-71;4.4E-69;4.7E-69;2.2E-64;2.7E-64;5.8E-62;1.2E-61;6.6E-61;4.8E-60;6.8E-60;1.4E-59;2.9E-59;2.9E-59;3.5E-59;4.6E-59;3.0E-58;4.4E-58;6.7E-58;2.8E-57;4.0E-57	alpha/beta fold hydrolase [Ilumatobacter sp.]	5.9e-71	301	247	14	237	61.94
MGYP000100106608	LOW QUALITY PROTEIN: lipase member K-like	360	1.4E-100;1.7E-89;2.1E-80;3.1E-75;1.5E-73;8.3E-68;7.1E-67;1.1E-64;8.6E-61;9.5E-61;3.6E-60;9.0E-59;2.0E-58;2.6E-58;7.6E-58;8.8E-58;8.8E-58;8.8E-58;8.8E-58;8.8E-58	LOW QUALITY PROTEIN: lipase member K-like [Dermatophagoides farinae]	1.4e-100	415	355	6	360	62.25
MGYP000102253632	MULTISPECIES: alpha/beta fold hydrolase	296	2.1E-169;3.5E-168;9.9E-168;2.3E-166;4.6E-144;7.1E-120;1.4E-83;8.0E-83;1.1E-80;4.4E-80;5.7E-76;2.4E-75;2.6E-75;3.1E-75;6.3E-74;1.4E-73;2.6E-71;2.9E-71;6.0E-71;2.7E-67	MULTISPECIES: alpha/beta fold hydrolase [Microthrix]	2.1e-169	256	249	7	255	99.6
MGYP000102844690	hypothetical protein	271	1.0E-182;2.7E-116;2.1E-112;2.1E-112;2.5E-111;2.5E-109;2.1E-108;3.4E-108;1.2E-104;1.2E-104;1.0E-103;2.4E-103;3.9E-102;2.0E-101;3.7E-101;9.2E-101;2.0E-97;8.2E-97;4.0E-47;1.4E-46	hypothetical protein [Agrococcus jenensis]	1e-182	271	271	1	271	97.05
MGYP000105384933	alpha/beta hydrolase	530	7.4E-60;3.1E-58;4.9E-57;6.6E-57;2.5E-55;2.6E-55;3.8E-53;5.3E-53;7.3E-53;2.8E-52;2.9E-52;1.1E-50;1.2E-50;3.9E-50;9.1E-49;1.6E-48;6.5E-48;9.0E-48;3.3E-47;1.4E-45	alpha/beta hydrolase [Synechocystis sp. PCC 7509]	7.4e-60	520	318	18	318	56.29
MGYP000105404208	alpha/beta fold hydrolase	254	7.0E-87;1.2E-85;4.3E-85;2.9E-83;2.9E-83;4.0E-83;1.1E-82;1.7E-82;2.3E-82;9.3E-82;9.6E-82;1.3E-81;3.9E-81;1.0E-80;1.1E-80;1.1E-80;1.6E-80;4.5E-80;6.3E-80;6.3E-80	alpha/beta fold hydrolase [Neolewinella marina]	7e-87	268	254	1	253	68.9
MGYP000105650313	alpha/beta fold hydrolase	300	1.4E-61;1.8E-61;3.4E-54;5.6E-53;6.1E-52;1.8E-51;1.8E-51;1.8E-51;5.9E-31;2.1E-27;4.2E-27;4.9E-27;5.7E-27;1.5E-26;3.0E-26;4.6E-26;1.1E-25;1.2E-25;1.2E-25;1.3E-25	alpha/beta fold hydrolase [Polyangium spumosum]	1.4e-61	323	273	9	281	60.81
MGYP000107747565	alpha/beta fold hydrolase	264	6.7E-105;1.8E-104;2.8E-102;2.3E-100;2.7E-99;9.5E-99;1.1E-98;3.5E-98;8.9E-98;1.1E-97;1.4E-97;4.0E-97;8.8E-97;3.0E-96;4.1E-96;1.2E-95;4.3E-95;1.1E-94;1.3E-94;3.5E-94	alpha/beta fold hydrolase [Nonomuraea guangzhouensis]	6.7e-105	270	262	3	264	72.52
MGYP000108263605	3-oxoadipate enol-lactonase	261	5.3E-196;1.0E-168;2.0E-166;3.6E-153;4.9E-108;6.7E-108;1.2E-106;1.3E-104;1.8E-104;3.8E-104;5.4E-104;8.6E-104;2.1E-103;4.6E-103;8.6E-103;9.9E-103;1.2E-102;1.2E-102;1.7E-102;1.7E-102	3-oxoadipate enol-lactonase [Salibaculum griseiflavum]	5.3e-196	261	261	1	261	100
MGYP000110572910	alpha/beta fold hydrolase	280	4.6E-146;9.6E-146;3.9E-145;1.1E-142;1.8E-141;1.0E-139;2.8E-139;1.1E-138;1.3E-138;1.6E-138;1.9E-138;1.3E-137;2.0E-137;1.1E-136;4.6E-136;5.4E-135;4.1E-134;4.1E-134;4.5E-134;5.8E-134	alpha/beta fold hydrolase [Intrasporangium chromatireducens]	4.6e-146	286	272	7	278	84.56
MGYP000110776688	alpha/beta hydrolase	310	8.2E-73;1.5E-48;2.5E-37;9.6E-34;1.1E-33;1.3E-33;1.5E-33;2.6E-33;3.0E-33;1.0E-32;1.0E-32;1.0E-32;1.1E-32;2.0E-32;2.0E-32;2.0E-32;4.8E-32;4.8E-32;4.9E-32;5.7E-32	alpha/beta hydrolase [Dokdonella sp.]	8.2e-73	362	278	35	310	62.95
MGYP000113740650	alpha/beta fold hydrolase	301	1.8E-61;1.8E-59;7.4E-57;8.1E-57;2.0E-48;5.7E-35;5.2E-30;3.2E-27;3.7E-27;1.3E-26;1.7E-26;5.3E-26;2.0E-25;9.0E-23;3.3E-22;4.2E-22;6.3E-22;8.7E-22;1.7E-21;2.3E-21	alpha/beta fold hydrolase [Halobacteriovorax marinus]	1.8e-61	296	277	27	300	62.45
MGYP000114014592	alpha/beta fold hydrolase	172	1.5E-43;1.5E-43;1.7E-43;1.4E-41;6.9E-41;2.2E-40;3.2E-40;6.3E-40;1.0E-39;1.2E-39;1.7E-39;2.0E-39;2.2E-39;2.2E-39;2.2E-39;3.1E-39;4.4E-39;6.6E-39;7.9E-39;7.9E-39	alpha/beta fold hydrolase [Sinimarinibacterium sp. CAU 1509]	1.5e-43	271	171	2	172	66.67
MGYP000114216073	lipase family protein	321	4.3E-29;2.9E-28;3.0E-26;5.0E-24;7.7E-24;1.0E-23;1.2E-23;1.9E-23;2.1E-23;2.9E-23;8.0E-23;2.3E-22;3.2E-22;4.4E-22;7.2E-22;8.0E-22;8.9E-22;1.1E-21;2.7E-21;2.7E-21	lipase family protein [Aliikangiella marina]	4.3e-29	342	345	3	310	50.72
MGYP000114221384	alpha/beta fold hydrolase	247	4.3E-51;3.2E-42;2.0E-35;7.8E-33;1.3E-32;4.4E-32;7.5E-32;8.4E-31;1.2E-29;4.5E-28;3.0E-27;5.9E-27;7.2E-27;1.1E-26;1.6E-26;2.3E-26;2.3E-26;2.3E-26;3.1E-26;3.3E-26	alpha/beta fold hydrolase [Clostridium thailandense]	4.3e-51	263	244	2	244	60.25
MGYP000114920885	triacylglycerol lipase	253	2.2E-172;8.5E-154;1.0E-141;1.1E-138;6.3E-114;1.0E-113;1.0E-113;1.0E-113;1.5E-113;1.5E-113;1.5E-113;1.5E-113;1.5E-113;2.1E-113;2.3E-113;2.9E-113;2.9E-113;2.9E-113;2.9E-113;4.2E-113	triacylglycerol lipase [Gallaecimonas pentaromativorans]	2.2e-172	308	253	1	253	100
MGYP000116282874	alpha/beta hydrolase	272	4.9E-177;5.5E-116;1.2E-114;4.9E-112;3.5E-100;4.9E-100;7.0E-100;2.0E-99;5.7E-99;1.9E-97;1.1E-96;6.2E-96;6.8E-96;8.7E-96;1.8E-95;2.5E-95;5.0E-95;2.8E-65;1.1E-63;3.1E-63	alpha/beta hydrolase [Romboutsia faecis]	4.9e-177	272	272	1	272	95.96
MGYP000116625254	twin-arginine translocation pathway signal	476	3.0E-262;5.7E-260;2.1E-223;8.5E-223;9.8E-222;9.8E-222;1.1E-220;2.3E-220;1.8E-219;4.0E-216;1.2E-215;1.7E-215;1.6E-213;1.8E-212;2.0E-209;4.2E-197;5.3E-197;2.3E-196;2.5E-196;7.2E-195	twin-arginine translocation pathway signal [Limnohabitans sp. Hippo4]	3e-262	438	432	45	476	89.35
MGYP000116982643	lipase family protein	165	1.0E-22;1.6E-20;1.7E-20;2.8E-20;1.7E-19;2.2E-19;3.8E-19;4.6E-19;6.0E-19;7.9E-19;1.4E-18;1.6E-18;2.3E-18;2.8E-18;4.6E-18;6.6E-18;8.2E-18;1.0E-17;1.3E-17;1.7E-17	lipase family protein [Tetrahymena thermophila SB210]	1e-22	285	150	1	146	57.33
MGYP000117915325	alpha/beta fold hydrolase	321	9.5E-86;4.5E-72;9.2E-71;3.9E-70;4.3E-69;2.1E-55;4.0E-51;2.9E-49;3.5E-49;4.1E-49;8.0E-49;4.3E-48;6.4E-48;7.1E-48;1.3E-47;1.8E-47;1.8E-47;1.8E-47;1.9E-47;2.5E-47	alpha/beta fold hydrolase [Oceanococcus atlanticus]	9.5e-86	317	308	12	319	62.99
MGYP000119276994	alpha/beta hydrolase	254	3.5E-86;7.1E-76;8.1E-76;2.0E-75;3.8E-75;6.7E-75;7.9E-75;2.9E-74;3.3E-74;6.4E-74;6.4E-74;6.4E-74;1.3E-73;1.9E-73;2.3E-73;3.3E-73;1.3E-72;1.3E-72;1.5E-72;6.3E-72	alpha/beta hydrolase [Aestuariivirga sp.]	3.5e-86	274	254	1	254	69.29
MGYP000119598692	lipase family protein	351	7.4E-117;3.0E-114;1.2E-113;5.4E-113;5.9E-113;1.6E-111;2.2E-111;6.6E-111;6.6E-111;6.6E-111;6.6E-111;6.6E-111;9.4E-111;1.3E-110;1.9E-110;2.7E-110;3.8E-110;3.8E-110;3.8E-110;5.4E-110	lipase family protein [Lysobacter solisilvae]	7.4e-117	321	319	16	333	71.16
MGYP000120145203	uncharacterized protein MONBRDRAFT_38123	284	1.3E-38;2.1E-34;1.5E-33;1.8E-33;2.5E-33;5.1E-33;6.1E-33;7.2E-33;3.1E-32;4.6E-32;5.0E-32;7.4E-32;7.4E-32;7.4E-32;7.4E-32;1.0E-31;1.3E-31;1.6E-31;1.6E-31;1.9E-31	uncharacterized protein MONBRDRAFT_38123 [Monosiga brevicollis MX1]	1.3e-38	277	258	38	280	54.26
MGYP000121019014	lipase	315	7.2E-237;3.0E-162;2.2E-142;1.4E-122;1.9E-113;1.2E-95;7.5E-71;2.2E-70;6.2E-70;2.1E-68;5.5E-67;1.7E-65;1.4E-63;2.7E-63;5.3E-62;9.1E-62;1.5E-61;4.5E-60;8.1E-60;1.2E-54	lipase [Malassezia restricta]	7.2e-237	315	315	1	315	99.37
MGYP000122494600	alpha/beta fold hydrolase	256	1.9E-57;2.6E-56;1.4E-55;1.8E-55;2.2E-55;3.9E-55;3.9E-55;5.5E-55;6.2E-55;1.1E-54;1.1E-54;1.3E-54;1.4E-54;2.0E-54;2.2E-54;2.2E-54;2.3E-54;3.2E-54;4.4E-54;4.5E-54	alpha/beta fold hydrolase [Parahaliea aestuarii]	1.9e-57	261	254	1	250	59.06
MGYP000122495599	triacylglycerol lipase	262	7.2E-137;5.3E-132;3.6E-120;1.2E-118;4.6E-105;2.8E-103;2.6E-97;2.6E-96;7.4E-96;1.1E-95;3.0E-95;3.0E-95;2.8E-93;2.8E-93;4.0E-93;8.0E-93;8.5E-93;1.2E-92;2.1E-92;2.1E-92	triacylglycerol lipase [Fluviicoccus sp.]	7.2e-137	310	262	1	262	89.31
MGYP000122957647	alpha/beta fold hydrolase	215	1.0E-80;1.0E-80;4.3E-77;5.0E-77;9.0E-77;1.2E-76;2.0E-76;4.9E-76;4.9E-76;4.9E-76;4.9E-76;1.1E-75;1.3E-75;1.5E-75;1.6E-75;2.3E-75;2.9E-75;3.6E-75;4.2E-75;6.8E-75	alpha/beta fold hydrolase [uncultured Treponema sp.]	1e-80	465	187	18	204	79.68
MGYP000123684544	alpha/beta fold hydrolase	191	8.2E-34;1.5E-33;2.0E-30;2.4E-28;2.5E-25;4.2E-25;7.8E-25;1.6E-24;2.7E-24;2.7E-24;2.9E-24;2.9E-24;3.6E-24;3.7E-24;3.8E-24;3.8E-24;4.1E-24;4.1E-24;4.3E-24;5.2E-24	alpha/beta fold hydrolase [Oharaeibacter diazotrophicus]	8.2e-34	233	191	2	191	58.12
MGYP000124935614	alpha/beta hydrolase	288	4.5E-203;1.3E-202;3.7E-202;3.7E-202;2.2E-201;6.2E-201;8.8E-201;8.8E-201;1.2E-200;2.5E-200;3.6E-200;3.6E-200;1.0E-199;1.5E-199;1.5E-199;2.1E-199;2.1E-199;5.7E-197;2.0E-170;2.8E-170	alpha/beta hydrolase [Lactiplantibacillus pentosus]	4.5e-203	285	285	4	288	100
MGYP000125286693	alpha/beta hydrolase	272	2.7E-65;7.5E-65;1.2E-61;5.2E-49;2.0E-48;2.2E-43;3.2E-43;5.8E-43;1.7E-41;8.6E-41;1.5E-40;2.8E-40;4.3E-39;1.0E-38;1.5E-38;1.7E-38;3.1E-38;3.2E-38;2.1E-37;3.5E-37	alpha/beta hydrolase [Thermogemmatispora tikiterensis]	2.7e-65	288	271	2	271	63.1
MGYP000125511228	putative extracellular lipase	217	9e-17	putative extracellular lipase [Paecilomyces variotii]	9e-17	297	184	17	190	52.72
MGYP000126003659	lipase family protein	285	7.6E-99;1.9E-97;1.9E-97;1.5E-96;4.3E-96;2.0E-94;8.2E-94;1.6E-93;5.1E-93;6.6E-93;7.2E-93;1.1E-92;1.9E-92;5.4E-92;1.5E-91;1.5E-91;3.1E-91;3.1E-91;2.5E-90;5.0E-90	lipase family protein [Marinomonas sp. CT5]	7.6e-99	287	270	16	285	74.07
MGYP000126034728	alpha/beta fold hydrolase	250	2.7E-106;3.9E-106;4.5E-106;7.5E-102;8.7E-101;1.7E-100;5.6E-98;1.6E-92;2.2E-92;2.5E-90;6.1E-90;3.2E-41;3.8E-40;5.3E-40;7.5E-40;7.5E-40;1.5E-39;1.5E-39;2.1E-39;2.1E-39	alpha/beta fold hydrolase [Desulfobotulus sp.]	2.7e-106	294	250	1	250	78
MGYP000126050162	alpha/beta fold hydrolase	272	2.0E-185;9.7E-184;1.0E-153;5.2E-139;1.2E-137;1.6E-123;5.9E-93;9.4E-92;7.9E-91;1.1E-87;5.8E-80;2.1E-75;4.8E-75;2.6E-70;5.3E-64;2.7E-53;4.9E-50;1.4E-49;2.8E-49;3.7E-49	alpha/beta fold hydrolase [Asticcacaulis taihuensis]	2e-185	272	272	1	272	96.32
MGYP000126706200	alpha/beta fold hydrolase	366	1.5E-110;3.0E-110;1.5E-105;1.6E-105;1.6E-105;4.1E-103;4.1E-103;1.2E-102;6.3E-102;1.0E-100;7.9E-100;3.0E-98;1.2E-95;1.8E-37;6.7E-37;1.5E-31;5.2E-29;6.0E-29;3.1E-28;2.6E-27	alpha/beta fold hydrolase [Sandaracinus amylolyticus]	1.5e-110	374	366	7	355	63.66
MGYP000127013695	hypothetical protein	427	1.4E-311;5.5E-78;5.5E-78;7.3E-78;7.7E-78;1.1E-77;2.9E-77;3.0E-77;3.1E-77;4.0E-77;4.2E-77;1.1E-76;1.1E-76;1.2E-76;2.2E-76;2.2E-76;2.2E-76;2.2E-76;3.1E-76;3.1E-76	hypothetical protein [Faecalibacterium prausnitzii]	1.4E-311	427	427	1	427	100
MGYP000131119961	uncharacterized protein DICPUDRAFT_149721	222	4.7E-31;7.1E-28;1.6E-27;3.3E-27;3.3E-27;3.4E-27;5.0E-27;8.3E-27;1.1E-26;1.2E-26;1.3E-26;1.5E-26;1.9E-26;2.7E-26;2.7E-26;3.2E-26;3.7E-26;4.0E-26;4.2E-26;4.4E-26	uncharacterized protein DICPUDRAFT_149721 [Dictyostelium purpureum]	4.7e-31	285	203	16	215	58.13
MGYP000131360036	alpha/beta fold hydrolase	277	6.8E-93;1.4E-49;1.0E-48;3.4E-48;4.0E-48;8.0E-48;2.3E-47;3.1E-47;4.8E-47;8.7E-47;8.7E-47;9.6E-45;1.7E-43;3.3E-35;5.4E-35;7.6E-35;7.6E-35;1.1E-34;2.8E-34;4.2E-34	alpha/beta fold hydrolase [Haliangium ochraceum]	6.8e-93	342	232	42	273	76.29
MGYP000134050585	triacylglycerol lipase	324	2.8E-84;3.2E-83;3.2E-83;3.2E-83;6.4E-83;9.1E-83;1.3E-82;3.6E-82;1.0E-81;4.6E-81;6.5E-81;1.7E-80;2.3E-80;3.1E-80;3.3E-80;8.3E-80;5.3E-79;5.3E-79;6.3E-79;1.5E-78	triacylglycerol lipase [Alcanivorax sp.]	2.8e-84	300	306	20	324	63.4
MGYP000134798784	alpha/beta hydrolase	242	2.2E-30;4.1E-28;6.9E-28;2.2E-27;3.1E-27;7.5E-27;8.1E-27;1.2E-26;2.2E-26;4.8E-26;4.8E-26;4.8E-26;5.1E-26;6.7E-26;8.6E-26;1.3E-25;1.3E-25;1.3E-25;1.6E-25;1.9E-25	alpha/beta hydrolase [Caloramator mitchellensis]	2.2e-30	253	238	3	233	55.04
MGYP000135073112	alpha/beta fold hydrolase	210	7.6E-42;8.3E-41;3.3E-40;1.0E-39;1.4E-39;1.4E-39;1.9E-39;2.4E-39;2.6E-39;2.7E-39;5.2E-39;7.3E-39;8.1E-39;8.1E-39;1.0E-38;1.0E-38;1.4E-38;2.3E-38;2.6E-38;5.8E-38	alpha/beta fold hydrolase [Phenylobacterium sp.]	7.6e-42	266	179	23	201	62.57
MGYP000135159293	triacylglycerol lipase	169	6.6E-79;1.9E-77;9.3E-77;1.5E-75;4.9E-75;8.5E-75;2.8E-74;5.6E-74;9.9E-74;1.2E-73;1.4E-73;2.8E-73;9.4E-73;3.3E-72;4.2E-72;4.6E-71;4.9E-70;9.1E-70;1.1E-69;2.1E-69	triacylglycerol lipase [Conexibacter woesei]	6.6e-79	213	170	1	169	81.76
MGYP000135451736	lipase family protein	159	1.2E-27;1.9E-27;2.6E-26;3.3E-26;3.7E-26;4.2E-26;4.3E-26;4.4E-26;4.7E-26;7.4E-26;7.8E-26;8.1E-26;8.1E-26;8.1E-26;1.1E-25;1.1E-25;1.3E-25;1.4E-25;1.4E-25;1.5E-25	lipase family protein [Rubripirellula obstinata]	1.2e-27	321	152	2	149	61.18
MGYP000136661227	triacylglycerol lipase	296	1.3E-216;2.6E-216;7.3E-216;1.5E-215;2.1E-215;3.0E-215;6.0E-215;2.4E-214;2.4E-214;9.9E-214;9.9E-214;4.1E-213;8.2E-213;8.2E-213;1.2E-212;2.3E-212;4.7E-212;9.6E-212;2.7E-211;7.7E-202	triacylglycerol lipase [Pseudomonas rhodesiae]	1.3e-216	296	296	1	296	100
MGYP000137001066	triacylglycerol lipase	345	3.9E-129;3.9E-129;7.8E-129;1.8E-127;7.4E-127;2.4E-125;2.4E-125;6.9E-125;2.8E-124;6.5E-123;6.5E-123;9.2E-123;9.2E-123;1.3E-122;3.7E-122;6.1E-121;3.5E-120;3.7E-120;5.3E-120;3.8E-119	triacylglycerol lipase [Alcanivorax sp.]	3.9e-129	318	315	31	345	72.7
MGYP000137745024	alpha/beta hydrolase	250	4.4E-78;2.8E-76;4.2E-72;1.6E-70;9.5E-70;1.8E-67;1.3E-66;2.7E-66;1.7E-65;4.7E-65;9.9E-64;2.0E-63;2.4E-63;3.7E-62;4.2E-62;5.3E-62;1.9E-61;1.5E-60;1.6E-60;1.3E-59	alpha/beta hydrolase [Microvirga makkahensis]	4.4e-78	262	181	1	181	76.24
MGYP000137796106	alpha/beta fold hydrolase	396	1.6E-283;2.1E-172;6.1E-140;3.0E-139;4.3E-138;6.1E-138;1.9E-137;3.6E-136;1.0E-135;2.0E-134;5.0E-132;2.2E-131;3.1E-131;3.4E-130;1.9E-129;2.8E-129;7.8E-129;1.5E-128;1.6E-128;2.2E-128	alpha/beta fold hydrolase [Phycicoccus sp.]	1.6e-283	396	396	1	396	100
MGYP000137837641	lipase family protein	195	2.6E-31;4.0E-30;1.5E-29;9.5E-29;6.6E-28;3.0E-27;4.9E-27;4.9E-27;1.9E-26;4.6E-26;1.3E-25;1.8E-25;1.9E-25;3.1E-25;3.7E-25;3.8E-25;5.4E-25;7.1E-25;8.7E-25;9.1E-25	lipase family protein [Tetrahymena thermophila SB210]	2.6e-31	312	191	1	186	58.64
MGYP000138429281	proline iminopeptidase-family hydrolase	310	2.5E-146;4.1E-124;5.8E-116;2.4E-115;7.8E-112;1.3E-111;1.8E-111;1.9E-111;2.8E-111;5.2E-111;2.2E-110;3.9E-110;4.2E-110;4.5E-110;5.6E-110;6.0E-110;1.1E-109;1.2E-109;1.3E-109;1.3E-109	proline iminopeptidase-family hydrolase [Ideonella sp.]	2.5e-146	305	293	8	299	78.16
MGYP000138436745	lipase family protein	214	4.2E-40;7.4E-40;1.5E-39;1.8E-39;1.8E-39;2.0E-39;4.9E-39;1.4E-38;1.2E-37;3.0E-37;2.4E-36;2.9E-36;3.5E-36;4.3E-36;4.3E-36;4.3E-36;6.1E-36;8.8E-36;1.1E-35;3.6E-35	lipase family protein [Wolbachia endosymbiont (group A) of Sphaerophoria taeniata]	4.2e-40	440	185	9	188	64.32
MGYP000138456398	lipase	208	5.3E-154;2.7E-82;2.1E-44;1.7E-42;1.3E-41;1.4E-41;1.2E-39;1.0E-38;1.1E-38;1.8E-38;2.8E-38;5.7E-38;5.9E-38;6.9E-38;1.1E-37;1.2E-37;1.9E-37;2.1E-37;2.2E-37;5.6E-37	lipase [Thecamonas trahens ATCC 50062]	5.3e-154	287	208	1	208	99.52
MGYP000139970300	alpha/beta hydrolase	214	9.1E-79;1.6E-73;7.3E-73;1.9E-72;1.9E-72;1.9E-72;1.9E-72;1.9E-72;2.9E-72;5.3E-72;5.3E-72;5.9E-72;5.9E-72;1.1E-71;1.1E-71;4.3E-71;4.3E-71;6.2E-71;6.2E-71;8.2E-71	alpha/beta hydrolase [Chondromyces apiculatus]	9.1e-79	244	212	3	214	72.64
MGYP000140210054	hypothetical protein	252	1.6E-46;5.2E-41;5.7E-38;9.8E-36;1.3E-27;1.8E-27;1.8E-27;8.5E-27;4.2E-26;4.0E-24;2.2E-23;2.6E-23;9.2E-23;3.1E-22;7.0E-22;1.4E-21;2.0E-21;3.1E-21;6.8E-21;1.6E-20	hypothetical protein [Desulfosarcina cetonica]	1.6e-46	607	219	37	252	62.1
MGYP000140690429	hypothetical protein	338	1.0E-146;1.6E-130;5.8E-130;3.3E-129;9.8E-129;1.9E-128;2.2E-127;6.3E-127;6.3E-127;3.6E-126;1.0E-125;2.6E-125;2.4E-124;4.4E-124;8.5E-124;8.6E-124;1.7E-123;1.8E-123;3.0E-123;7.8E-123	hypothetical protein [Conexibacter sp. DBS9H8]	1e-146	339	309	30	338	77.99
MGYP000140769495	alpha/beta hydrolase	235	2.5E-88;7.1E-88;3.7E-87;8.9E-86;5.7E-85;2.0E-84;2.7E-84;3.2E-84;3.9E-84;7.2E-84;7.5E-84;2.6E-83;4.3E-83;4.5E-83;6.9E-83;1.2E-82;1.6E-82;1.7E-82;1.8E-82;3.4E-82	alpha/beta hydrolase [Niastella vici]	2.5e-88	231	233	1	233	72.96
MGYP000141479521	predicted protein	181	3.1e-50	predicted protein [Phaeodactylum tricornutum CCAP 1055/1]	3.1e-50	359	133	49	181	80.45
MGYP000142112799	lipase family protein	482	4.8E-99;8.5E-97;3.4E-96;6.3E-96;7.5E-95;8.5E-95;1.5E-92;1.8E-92;3.6E-92;7.2E-92;1.0E-91;1.0E-91;2.0E-91;2.3E-91;4.6E-91;6.5E-91;8.6E-91;2.6E-90;3.4E-90;6.4E-90	lipase family protein [Raoultibacter phocaeensis]	4.8e-99	442	409	60	467	58.19
MGYP000142693012	triacylglycerol lipase	450	9.5E-188;4.4E-185;4.4E-185;1.3E-184;1.3E-184;1.8E-184;1.0E-183;1.4E-183;1.4E-183;1.4E-183;2.0E-183;2.0E-183;1.2E-182;4.1E-182;3.3E-181;3.9E-181;4.7E-181;1.9E-180;5.2E-180;5.2E-180	triacylglycerol lipase [Anaeromicropila populeti]	9.5e-188	455	446	7	450	75.34
MGYP000145013544	triacylglycerol lipase	325	2.0E-232;8.6E-232;1.0E-230;6.9E-179;7.7E-179;9.8E-179;2.2E-178;3.1E-178;3.1E-178;1.3E-177;1.6E-177;4.2E-177;1.0E-176;2.3E-176;2.3E-176;2.5E-176;3.2E-176;3.2E-176;3.2E-176;9.7E-176	triacylglycerol lipase [Dysosmobacter sp.]	2e-232	447	326	1	325	99.39
MGYP000145384203	alpha/beta hydrolase	362	4.2E-262;1.7E-261;1.3E-258;5.5E-232;6.2E-231;2.6E-214;5.3E-214;7.5E-214;1.1E-213;1.1E-213;1.5E-213;1.5E-213;1.5E-213;1.5E-213;2.2E-213;2.2E-213;3.1E-213;3.1E-213;3.1E-213;3.1E-213	alpha/beta hydrolase [Blautia marasmi]	4.2e-262	362	362	1	362	100
MGYP000146968394	alpha/beta fold hydrolase	283	1.7E-134;3.5E-132;6.7E-130;7.8E-129;1.8E-127;1.8E-127;3.2E-96;2.4E-95;4.2E-95;1.1E-94;2.0E-94;2.8E-94;3.1E-94;4.2E-94;5.8E-94;1.1E-93;1.4E-93;1.5E-93;1.9E-93;2.0E-93	alpha/beta fold hydrolase [Acaryochloris sp. IP29b_bin.148]	1.7e-134	303	282	1	282	78.37
MGYP000146999397	MULTISPECIES: radical SAM protein	461	5.2E-121;9.8E-120;3.9E-119;1.6E-118;1.6E-118;2.2E-118;2.2E-118;1.1E-117;1.1E-117;2.3E-117;2.3E-117;4.5E-117;1.4E-116;2.1E-116;3.1E-116;1.2E-114;2.4E-114;1.3E-112;2.8E-111;1.1E-108	MULTISPECIES: radical SAM protein [Marinitoga]	5.2e-121	463	448	7	450	61.83
MGYP000147419737	alpha/beta fold hydrolase	299	5.3E-206;6.1E-205;7.2E-204;2.6E-192;3.1E-191;1.9E-190;1.1E-189;1.2E-188;4.0E-187;2.7E-185;3.8E-185;3.0E-182;2.3E-177;8.0E-176;7.7E-74;1.1E-73;1.5E-73;1.7E-72;2.5E-72;4.9E-72	alpha/beta fold hydrolase [uncultured Corynebacterium sp.]	5.3e-206	299	299	1	299	99.67
MGYP000148898046	lipase family protein	134	9.5E-21;1.6E-20;2.2E-20;2.2E-20;4.2E-20;4.3E-20;4.3E-20;4.3E-20;6.0E-20;7.6E-20;1.1E-19;1.4E-19;1.7E-19;1.7E-19;1.7E-19;2.8E-19;2.9E-19;3.9E-19;6.4E-19;7.6E-19	lipase family protein [Mycobacterium colombiense]	9.5e-21	238	98	9	106	66.33
MGYP000148990388	alpha/beta hydrolase	261	2.7E-90;2.1E-86;1.7E-85;4.6E-52;9.1E-52;1.8E-51;3.5E-51;4.9E-51;7.0E-51;8.9E-51;1.4E-50;1.4E-50;4.5E-50;5.1E-50;1.3E-49;1.3E-49;1.3E-49;1.6E-49;1.8E-49;1.9E-49	alpha/beta hydrolase [Protaetiibacter sp. WY-16]	2.7e-90	265	261	4	261	66.67
MGYP000149088673	lipase family protein	218	1.9E-29;3.7E-29;1.0E-28;2.9E-28;5.8E-28;1.5E-27;1.6E-27;2.0E-27;2.2E-27;4.3E-27;1.3E-26;1.7E-26;2.2E-26;2.3E-26;3.3E-26;3.4E-26;3.4E-26;3.4E-26;6.2E-26;6.6E-26	lipase family protein [Streptomyces sp. NY05-11A]	1.9e-29	273	204	15	211	52.94
MGYP000150304214	3-oxoadipate enol-lactonase	262	3.3E-186;1.6E-184;3.3E-154;2.2E-152;5.2E-151;7.5E-151;1.1E-150;2.1E-150;8.7E-150;1.2E-149;1.8E-149;2.5E-149;5.0E-149;7.1E-149;5.8E-148;1.7E-147;7.5E-144;7.5E-142;3.6E-114;1.2E-112	3-oxoadipate enol-lactonase [Tritonibacter scottomollicae]	3.3e-186	262	262	1	262	99.24
MGYP000150578108	MULTISPECIES: alpha/beta fold hydrolase	314	6.9E-189;9.7E-189;1.4E-188;2.0E-188;2.8E-188;8.0E-188;8.0E-188;2.3E-187;4.6E-187;4.6E-187;1.3E-186;1.9E-186;2.7E-186;3.8E-186;7.7E-186;1.3E-184;4.8E-159;1.4E-158;1.4E-158;1.9E-158	MULTISPECIES: alpha/beta fold hydrolase [Capnocytophaga]	6.9e-189	257	257	58	314	100
MGYP000152424431	lipase family protein	222	2.3E-79;1.3E-78;5.3E-78;4.4E-77;1.8E-76;2.5E-76;1.4E-75;1.4E-75;3.0E-75;3.1E-72;1.0E-67;3.5E-66;8.0E-66;4.6E-65;7.7E-36;6.6E-34;1.9E-33;3.7E-33;5.6E-33;7.9E-33	lipase family protein [Ligaoa zhengdingensis]	2.3e-79	225	222	1	220	71.17
MGYP000152481789	alpha/beta hydrolase	221	1.3E-92;6.2E-67;1.2E-65;2.1E-65;4.5E-65;5.7E-64;1.1E-63;2.2E-62;4.2E-62;2.9E-61;5.0E-61;6.6E-61;6.2E-59;1.8E-58;3.2E-58;3.2E-58;7.4E-58;1.2E-57;3.6E-57;6.0E-57	alpha/beta hydrolase [Mycolicibacterium mucogenicum]	1.3e-92	277	221	1	221	71.49
MGYP000153198991	hypothetical protein, variant 2	169	3.1E-31;3.6E-31;4.9E-31;3.1E-30;1.6E-29;1.8E-28;7.6E-28;8.1E-28;2.0E-27;4.2E-26;4.6E-26;8.4E-26;1.1E-25;2.4E-25;2.0E-23;4.1E-23;4.2E-23;1.0E-22;2.0E-22;3.6E-22	hypothetical protein, variant 2 [Phytophthora nicotianae INRA-310]	3.1e-31	708	162	2	163	56.79
MGYP000153287837	alpha/beta fold hydrolase	276	2.2E-36;5.5E-26;1.5E-25;1.6E-24;4.5E-24;1.2E-23;1.6E-23;1.7E-23;2.4E-23;6.6E-23;9.1E-23;9.2E-23;1.1E-22;1.2E-22;1.2E-22;1.2E-22;1.6E-22;1.7E-22;1.8E-22;1.8E-22	alpha/beta fold hydrolase [uncultured Halomonas sp.]	2.2e-36	186	176	46	217	61.36
MGYP000153426342	alpha/beta hydrolase	273	7.2E-200;8.4E-199;1.2E-198;2.4E-198;2.4E-198;3.4E-198;4.9E-198;4.9E-198;6.9E-198;9.8E-198;9.8E-198;9.8E-198;9.8E-198;9.8E-198;1.4E-197;1.4E-197;2.0E-197;2.8E-197;4.0E-197;5.7E-197	alpha/beta hydrolase [Clostridium perfringens]	7.2e-200	273	273	1	273	100
MGYP000154674847	alpha/beta hydrolase	304	1.1E-221;3.2E-207;1.2E-202;2.1E-198;1.0E-194;1.3E-190;3.9E-137;5.6E-137;9.0E-134;1.0E-132;4.1E-132;9.8E-132;7.4E-131;2.7E-129;3.3E-129;3.9E-129;1.1E-128;3.2E-128;1.0E-126;1.5E-126	alpha/beta hydrolase [Chroococcidiopsis sp. TS-821]	1.1e-221	304	304	1	304	100
MGYP000154805944	lipase family protein	164	2.2E-54;5.2E-50;1.3E-32;3.4E-32;5.3E-31;2.1E-30;2.1E-30;3.1E-30;4.1E-30;5.7E-30;5.7E-30;1.1E-29;1.7E-29;1.7E-29;4.6E-29;4.7E-29;4.8E-29;6.3E-29;6.3E-29;6.4E-29	lipase family protein [Edaphobacter sp.]	2.2e-54	322	169	1	163	69.23
MGYP000154932406	acetoin dehydrogenase dihydrolipoyllysine-residue acetyltransferase subunit	239	2.0E-83;2.3E-82;1.8E-81;2.0E-81;3.7E-81;7.3E-81;1.0E-80;2.0E-80;2.1E-80;2.1E-80;5.9E-80;8.3E-80;1.1E-79;1.7E-79;4.3E-79;6.5E-79;6.5E-79;2.6E-78;2.6E-78;2.7E-78	acetoin dehydrogenase dihydrolipoyllysine-residue acetyltransferase subunit [Bradyrhizobium sp. WD16]	2e-83	373	237	2	238	73.42
MGYP000155963515	alpha/beta hydrolase	265	1.4E-117;4.3E-112;9.5E-90;1.9E-87;7.6E-87;6.9E-83;4.0E-82;3.3E-74;1.2E-70;6.6E-70;1.1E-69;1.5E-69;6.7E-67;1.6E-65;1.3E-64;1.6E-62;2.7E-26;2.3E-19;8.2E-18	alpha/beta hydrolase [Neolewinella aurantiaca]	1.4e-117	265	264	1	264	72.35
MGYP000158346315	alpha/beta fold hydrolase	286	6.8E-92;1.1E-90;1.6E-87;3.0E-85;8.3E-66;1.6E-65;1.6E-65;2.3E-65;2.3E-65;6.4E-65;8.8E-65;8.8E-65;1.3E-64;1.3E-64;1.3E-64;1.8E-64;1.8E-64;2.5E-64;3.6E-64;3.6E-64	alpha/beta fold hydrolase [Anaerovorax odorimutans]	6.8e-92	274	284	3	286	67.61
MGYP000159148467	alpha/beta fold hydrolase	316	1.2E-153;1.5E-102;1.2E-101;1.9E-96;2.4E-94;3.6E-48;4.7E-46;3.9E-45;3.8E-44;3.9E-44;5.5E-44;7.7E-44;7.7E-44;9.2E-44;1.1E-43;3.0E-43;3.9E-43;4.1E-43;4.1E-43;4.1E-43	alpha/beta fold hydrolase [Oceanococcus atlanticus]	1.2e-153	317	312	1	312	80.45
MGYP000163082019	hypothetical protein	412	2.4E-297;2.1E-291;1.6E-133;7.2E-132;6.4E-127;1.8E-126;5.4E-126;8.5E-122;2.1E-121;3.0E-121;6.0E-121;6.2E-121;9.1E-121;9.1E-121;6.8E-120;6.8E-120;1.6E-118;4.4E-118;1.3E-117;5.1E-117	hypothetical protein [Anaerosalibacter massiliensis]	2.4e-297	418	412	1	412	99.51
MGYP000163542640	lipase	191	2.7E-79;4.5E-78;9.4E-78;1.2E-77;3.8E-77;5.2E-77;2.0E-76;2.1E-76;5.0E-76;2.0E-75;5.8E-75;7.2E-75;1.0E-74;1.4E-74;1.9E-74;2.8E-74;6.8E-74;1.1E-73;1.7E-73;3.2E-73	lipase [Shewanella atlantica]	2.7e-79	192	189	1	189	78.84
MGYP000163781578	triacylglycerol lipase	327	4.1E-104;4.1E-104;3.3E-103;3.3E-103;4.7E-103;4.7E-103;1.1E-102;1.3E-102;1.3E-102;1.3E-102;1.7E-102;1.9E-102;1.9E-102;2.7E-102;2.7E-102;2.7E-102;2.7E-102;3.8E-102;3.8E-102;3.8E-102	triacylglycerol lipase [Pseudomonas sp. UBA6323]	4.1e-104	317	290	41	327	73.45
MGYP000163791188	alpha/beta fold hydrolase	262	1.8E-90;2.1E-81;6.3E-78;5.1E-77;2.1E-76;2.1E-76;2.9E-76;2.9E-76;4.2E-76;1.2E-75;1.2E-75;1.7E-75;4.8E-75;4.8E-75;6.8E-75;5.5E-74;1.5E-73;1.6E-64;9.7E-64;4.2E-63	alpha/beta fold hydrolase [Alpinimonas psychrophila]	1.8e-90	262	261	1	261	70.5
MGYP000164166602	predicted protein	215	9.1E-64;2.7E-52;2.1E-50;6.5E-49;2.9E-40;9.8E-38;1.5E-37;1.5E-37;2.7E-37;2.7E-37;4.3E-37;7.0E-37;1.3E-36;1.3E-36;1.4E-36;1.7E-36;2.0E-36;2.7E-36;3.1E-36;3.2E-36	predicted protein [Thalassiosira pseudonana CCMP1335]	9.1e-64	497	212	7	215	67.92
MGYP000164373824	lipase family protein	193	7.0E-27;1.4E-18;2.1E-16	lipase family protein [uncultured Sphaerochaeta sp.]	7e-27	209	179	17	188	56.42
MGYP000164554961	lipase ZK262.3-like	359	1.8E-228;5.1E-225;1.2E-103;2.1E-100;1.9E-98;2.1E-97;3.1E-97;3.4E-96;3.6E-96;3.6E-96;5.0E-96;2.3E-95;8.8E-95;1.1E-94;2.1E-93;4.3E-93;9.2E-90;8.0E-88;1.2E-87;5.8E-87	lipase ZK262.3-like [Acropora millepora]	1.8e-228	316	316	44	359	98.42
MGYP000164766454	triacylglycerol lipase	293	9.6E-215;8.0E-200;1.2E-176;7.0E-176;7.0E-176;5.8E-175;1.2E-174;6.7E-174;9.5E-174;1.9E-173;5.5E-173;7.8E-173;2.2E-172;6.4E-172;6.4E-172;6.4E-172;9.1E-172;1.3E-171;3.7E-171;3.7E-171	triacylglycerol lipase [Pseudomonas sp. efr-133-TYG-103a]	9.6e-215	293	293	1	293	99.32
MGYP000167334648	uncharacterized protein LOC112280770	388	3.1E-109;8.0E-102;3.2E-101;2.4E-21;2.4E-21;2.4E-21;3.2E-21;3.3E-21;3.3E-21;3.3E-21;1.3E-20;1.4E-20;1.4E-20;1.4E-20;1.4E-20;1.4E-20;4.1E-20;4.4E-20;4.6E-20;4.6E-20	uncharacterized protein LOC112280770 [Physcomitrium patens]	3.1e-109	525	409	1	377	62.35
MGYP000167363053	alpha/beta fold hydrolase	250	5.8E-79;6.2E-78;8.8E-78;1.5E-76;6.6E-75;5.4E-74;1.6E-73;4.5E-73;3.5E-72;3.6E-72;4.4E-72;4.6E-72;4.9E-72;5.3E-72;6.6E-72;6.6E-72;6.6E-72;7.2E-72;7.4E-72;7.4E-72	alpha/beta fold hydrolase [Streptacidiphilus griseoplanus]	5.8e-79	308	218	15	225	70.64
MGYP000167484467	alpha/beta fold hydrolase	228	7.4E-85;2.0E-83;5.6E-83;4.6E-82;9.2E-82;3.7E-81;7.5E-81;1.3E-80;1.5E-80;3.9E-80;1.6E-79;2.6E-78;6.0E-77;1.8E-76;5.4E-76;3.2E-75;5.5E-75;5.5E-75;7.7E-75;9.2E-74	alpha/beta fold hydrolase [Niastella populi]	7.4e-85	227	226	1	226	71.68
MGYP000167976329	alpha/beta fold hydrolase	290	1.3E-175;1.6E-172;6.7E-172;3.8E-171;6.1E-168;1.8E-158;5.2E-157;8.6E-156;5.0E-154;2.8E-151;1.8E-146;1.8E-146;2.4E-146;2.4E-146;4.9E-146;4.9E-146;1.1E-145;1.1E-145;1.4E-145;1.4E-145	alpha/beta fold hydrolase [Gordonia mangrovi]	1.3e-175	314	287	4	290	88.85
MGYP000168043087	lipase family protein	313	2.7E-54;2.7E-54;2.8E-52;5.5E-52;5.5E-52;1.5E-51;4.9E-51;7.5E-25;1.2E-20;2.0E-20;4.7E-20;7.1E-20;9.9E-20;1.1E-18;1.9E-18;2.5E-18;2.5E-18;2.5E-18;6.6E-18;6.6E-18	lipase family protein [uncultured Tateyamaria sp.]	2.7e-54	305	298	6	292	56.04
MGYP000169523861	alpha/beta fold hydrolase	383	6.9E-140;1.6E-122;8.7E-116;1.3E-115;5.0E-115;1.4E-114;1.6E-114;2.3E-114;2.3E-113;1.1E-111;1.2E-111;3.5E-111;1.2E-110;1.1E-109;1.6E-109;2.3E-109;1.3E-108;3.5E-106;1.2E-105;3.9E-105	alpha/beta fold hydrolase [Candidatus Korobacter versatilis]	6.9e-140	380	377	1	377	70.82
MGYP000169796101	alpha/beta fold hydrolase	169	1.7E-36;2.4E-36;6.9E-36;9.4E-36;9.4E-36;9.4E-36;1.7E-35;3.3E-35;2.9E-34;4.1E-34;5.3E-34;6.4E-34;6.7E-34;8.2E-34;8.2E-34;8.2E-34;1.2E-33;1.2E-33;1.3E-33;2.0E-33	alpha/beta fold hydrolase [uncultured Roseobacter sp.]	1.7e-36	263	121	24	143	74.38
MGYP000170988632	alpha/beta hydrolase	262	3.1E-96;3.6E-95;7.4E-90;2.1E-84;4.6E-83;2.9E-82;1.9E-80;1.9E-80;1.9E-80;3.9E-80;3.9E-80;3.9E-80;3.9E-80;6.3E-79;3.1E-70;5.6E-70;1.5E-69;1.6E-69;1.7E-68;2.4E-68	alpha/beta hydrolase [Tissierella simiarum]	3.1e-96	263	263	1	262	71.1
MGYP000170995510	alpha/beta fold hydrolase	276	5.3E-151;2.3E-118;4.6E-118;2.2E-115;6.6E-112;3.3E-105;4.1E-102;1.1E-101;2.5E-100;3.8E-99;1.0E-96;3.1E-96;6.9E-95;7.1E-88;1.4E-84;4.4E-84;6.3E-83;1.4E-82;4.5E-82;6.2E-78	alpha/beta fold hydrolase [Syntrophotalea acetylenivorans]	5.3e-151	276	275	1	275	85.09
MGYP000172674932	lipase family protein	269	8.9E-46;7.2E-45;1.5E-42;6.3E-42;1.2E-41;1.2E-41;2.5E-41;4.9E-41;6.9E-41;8.1E-41;1.0E-40;2.7E-40;2.7E-40;1.8E-38;5.9E-38;6.7E-35;2.2E-33;3.0E-33;1.1E-29;1.2E-28	lipase family protein [Paenibacillus curdlanolyticus]	8.9e-46	268	262	1	256	53.44
MGYP000174093824	protein NDRG3	371	9.5E-100;7.6E-98;1.9E-92;2.9E-91;7.3E-91;7.3E-91;7.3E-91;8.3E-90;8.6E-88;2.4E-87;2.4E-87;3.8E-87;6.4E-87;5.9E-86;1.5E-85;1.5E-85;1.6E-84;2.8E-84;3.9E-84;3.9E-84	protein NDRG3 [Tetranychus urticae]	9.5e-100	430	327	49	361	65.14
MGYP000175350634	alpha/beta hydrolase	237	2.6E-72;8.6E-71;6.4E-69;2.7E-68;3.0E-67;1.6E-65;8.9E-63;1.0E-52;1.0E-52;1.9E-51;6.2E-48;4.9E-47;4.0E-45;8.8E-24;9.7E-22;8.1E-21;6.1E-19;8.8E-17;6.0E-16	alpha/beta hydrolase [Phreatobacter sp.]	2.6e-72	256	233	2	234	66.95
MGYP000176127465	3-oxoadipate enol-lactonase	263	8.6E-178;7.2E-170;4.0E-167;5.4E-165;2.6E-126;1.0E-123;1.4E-121;2.8E-121;2.9E-121;1.5E-120;1.9E-119;2.7E-119;1.1E-118;1.6E-118;1.9E-118;3.1E-118;1.3E-117;1.8E-117;2.3E-117;7.3E-117	3-oxoadipate enol-lactonase [Mesorhizobium sp.]	8.6e-178	263	263	1	263	96.96
MGYP000176610043	3-oxoadipate enol-lactonase	273	6.2E-124;4.5E-119;4.1E-118;1.4E-116;5.5E-103;1.4E-102;4.6E-101;6.6E-101;3.8E-100;1.5E-99;4.5E-99;3.3E-98;6.6E-98;7.7E-98;1.3E-97;1.3E-97;1.3E-97;1.3E-97;1.9E-97;2.0E-97	3-oxoadipate enol-lactonase [Ramlibacter pallidus]	6.2e-124	268	264	1	264	78.79
MGYP000178363320	alpha/beta hydrolase	294	4.8E-57;9.1E-46;1.9E-44;1.5E-43;1.3E-42;9.6E-42;1.7E-41;1.9E-41;4.9E-41;5.4E-41;8.5E-41;8.5E-41;9.4E-41;1.9E-40;2.6E-40;3.7E-40;3.7E-40;3.7E-40;3.7E-40;3.7E-40	alpha/beta hydrolase [Ilumatobacter sp.]	4.8e-57	322	284	11	292	53.87
MGYP000179514278	triacylglycerol lipase	271	3.5E-26;4.7E-26;6.6E-26;7.0E-26;1.1E-25;1.3E-25;1.8E-25;2.7E-25;2.7E-25;3.8E-25;3.8E-25;3.8E-25;5.3E-25;5.3E-25;5.3E-25;7.4E-25;7.4E-25;7.4E-25;7.4E-25;7.4E-25	triacylglycerol lipase [Mesobacillus selenatarsenatis]	3.5e-26	242	190	72	250	55.26
MGYP000179789747	alpha/beta hydrolase	252	3.1E-176;4.6E-97;2.0E-95;6.6E-95;9.0E-95;5.1E-94;4.2E-93;4.5E-93;5.9E-93;2.3E-92;5.5E-92;1.4E-91;1.6E-91;4.8E-91;1.7E-90;3.5E-90;3.5E-90;7.8E-90;1.2E-89;1.2E-89	alpha/beta hydrolase [Mesorhizobium sp. Z1-4]	3.1e-176	277	252	1	252	98.41
MGYP000179827670	alpha/beta hydrolase	269	7.2E-49;6.3E-45;2.4E-43;5.5E-40;1.8E-37;3.6E-37;4.3E-37;1.1E-36;1.2E-36;1.4E-36;1.4E-36;1.4E-36;2.7E-36;3.1E-36;4.4E-36;5.5E-36;5.7E-36;7.5E-36;7.7E-36;1.0E-35	alpha/beta hydrolase [Sphingomonas sp. Root710]	7.2e-49	272	261	6	264	54.79
MGYP000181341717	hypothetical protein	199	1.2E-29;1.3E-29;1.4E-29;4.5E-29;4.5E-29;6.2E-29;7.6E-29;9.7E-29;9.7E-29;1.2E-28;1.6E-28;1.6E-28;1.6E-28;2.0E-28;2.0E-28;2.3E-28;2.3E-28;2.3E-28;4.3E-28;5.4E-28	hypothetical protein [Rossellomorea aquimaris]	1.2e-29	493	206	2	199	55.34
MGYP000181865823	lipase family protein	195	3.2E-22;4.3E-18;1.9E-17;2.4E-17;3.0E-17;3.6E-17;4.3E-17;5.3E-17;5.9E-17;1.5E-16;2.2E-16;2.6E-16;3.5E-16;4.1E-16;4.5E-16;5.0E-16;5.0E-16;5.8E-16;7.0E-16;7.0E-16	lipase family protein [Leptolyngbya sp. PCC 6406]	3.2e-22	259	216	4	190	50.93
MGYP000181989489	alpha/beta hydrolase	226	1.2E-46;1.5E-44;1.6E-43;7.8E-43;2.3E-42;2.9E-42;1.2E-41;2.9E-41;3.4E-41;7.3E-41;7.3E-41;1.4E-40;2.0E-40;7.1E-40;9.8E-40;4.5E-39;4.6E-39;5.4E-39;1.3E-38;1.3E-38	alpha/beta hydrolase [Saccharopolyspora rosea]	1.2e-46	260	220	6	224	63.18
MGYP000182683741	uncharacterized protein ONS95_004188	220	8.2E-18;1.7E-17;2.3E-17;9.5E-17;1.0E-16;1.4E-16;4.2E-16;5.5E-16	uncharacterized protein ONS95_004188 [Cadophora gregata]	8.2e-18	285	144	81	220	57.64
MGYP000182753330	alpha/beta fold hydrolase	348	1.7E-263;6.9E-263;1.9E-171;9.4E-152;1.3E-151;3.8E-151;4.4E-150;7.7E-128;2.0E-80;1.1E-77;1.2E-77;1.2E-77;1.9E-77;3.2E-77;2.6E-76;2.2E-73;3.2E-72;1.4E-71;2.6E-63;7.0E-32	alpha/beta fold hydrolase [Alcanivorax sp.]	1.7e-263	348	348	1	348	100
MGYP000184451726	lipase family protein	290	1.7E-189;6.0E-172;1.8E-84;2.3E-77;2.6E-76;3.7E-76;3.7E-76;7.2E-76;7.4E-76;2.1E-75;3.0E-75;1.8E-73;9.9E-60;2.7E-56;7.5E-56;9.5E-56;3.4E-54;1.1E-52;6.8E-49;1.4E-48	lipase family protein [Polynucleobacter sp. Latsch14-2]	1.7e-189	283	278	4	281	94.24
MGYP000184496942	alpha/beta hydrolase	250	2.5E-84;1.0E-83;4.2E-83;5.9E-82;3.9E-81;8.9E-81;3.0E-65;3.0E-65;7.0E-63;8.7E-63;6.3E-45;4.1E-17;1.1E-16;2.1E-16;5.7E-16;7.9E-16;7.9E-16;7.9E-16	alpha/beta hydrolase [Legionella sp. 16cNR16C]	2.5e-84	250	244	7	250	70.49
MGYP000184548764	hypothetical protein	288	3.7E-101;1.8E-100;2.5E-100;7.2E-100;1.0E-99;1.5E-99;1.7E-99;2.1E-99;2.2E-99;2.8E-99;2.9E-99;2.9E-99;2.9E-99;3.9E-99;5.1E-99;6.0E-99;8.3E-99;1.2E-98;1.2E-98;1.7E-98	hypothetical protein [Pseudomonas fluorescens]	3.7e-101	355	243	32	274	77.37
MGYP000184898267	lipase	224	6.8E-28;1.5E-27;2.0E-27;4.0E-27;4.5E-27;5.6E-27;5.6E-27;1.1E-26;2.8E-25;1.4E-23;2.0E-23;4.6E-23;7.7E-23;9.4E-23;1.1E-22;3.2E-22;1.5E-21;2.1E-21;2.3E-21;2.3E-21	lipase [Trypanosoma theileri]	6.8e-28	342	219	22	221	53.42
MGYP000185613759	alpha/beta hydrolase	258	5.9E-154;1.9E-88;1.4E-87;4.5E-84;5.2E-84;1.1E-42;6.0E-40;2.8E-37;3.1E-37;1.7E-36;1.3E-35;5.9E-34;9.0E-34;4.8E-33;4.8E-33;7.0E-33;7.3E-33;8.4E-33;5.5E-32;7.9E-32	alpha/beta hydrolase [Epidermidibacterium keratini]	5.9e-154	263	257	1	257	90.66
MGYP000185965118	hypothetical protein	212	1.9E-151;1.1E-150;1.6E-150;1.3E-149;3.2E-123;4.4E-53;2.1E-52;2.4E-52;4.7E-52;6.6E-52;2.7E-51;3.8E-51;4.4E-50;4.4E-50;4.9E-50;6.2E-50;6.2E-50;6.2E-50;3.5E-49;4.5E-49	hypothetical protein [Lactobacillus iners]	1.9e-151	212	212	1	212	100
MGYP000187311782	alpha/beta hydrolase	197	1.5E-64;7.1E-63;1.2E-61;1.6E-61;2.2E-59;4.4E-59;8.2E-57;4.2E-50;1.8E-46;2.5E-46;1.0E-45;7.2E-43;3.7E-40;8.3E-38;1.2E-37;9.4E-37;1.1E-35;8.6E-35;3.2E-34;2.2E-33	alpha/beta hydrolase [Rhodoluna sp. KAS3]	1.5e-64	196	197	1	197	67.01
MGYP000190093364	alpha/beta hydrolase	271	1.2E-95;1.3E-92;5.8E-91;1.9E-80;3.2E-79;6.4E-79;2.6E-78;5.1E-78;6.8E-78;2.9E-77;3.2E-76;3.4E-76;1.3E-75;3.5E-75;6.8E-75;9.9E-75;2.0E-74;1.3E-72;2.6E-72;4.3E-71	alpha/beta hydrolase [Candidatus Chloroploca asiatica]	1.2e-95	271	271	2	271	68.27
MGYP000190856036	alpha/beta hydrolase	313	2.7E-164;2.7E-164;3.2E-163;9.1E-163;1.3E-162;1.8E-162;8.4E-127;1.2E-126;1.2E-126;1.2E-126;4.9E-126;8.0E-125;6.5E-124;9.3E-123;1.2E-122;1.3E-122;1.3E-122;1.9E-122;1.9E-122;3.8E-122	alpha/beta hydrolase [uncultured Alistipes sp.]	2.7e-164	272	238	76	313	100
MGYP000190908217	alpha/beta hydrolase	241	7.7E-75;3.2E-60;1.3E-42;2.2E-41;5.5E-41;2.2E-40;3.8E-39;4.8E-37;1.6E-36;3.6E-35;1.4E-34;5.0E-29;3.8E-28;1.2E-25;1.0E-24;1.0E-24;1.4E-24;2.9E-23;6.3E-23;1.2E-22	alpha/beta hydrolase [Halorubrum sp. Ea8]	7.7e-75	266	233	1	233	69.1
MGYP000191162294	alpha/beta fold hydrolase	209	1.0E-61;5.6E-56;4.2E-55;8.2E-55;1.0E-54;1.2E-54;1.2E-54;1.7E-54;6.7E-54;7.2E-54;8.7E-54;9.5E-54;9.5E-54;9.5E-54;1.6E-53;1.9E-53;1.9E-53;2.1E-53;2.1E-53;2.6E-53	alpha/beta fold hydrolase [Acidiferrimicrobium sp. IK]	1e-61	315	207	2	208	67.63
MGYP000191273179	alpha/beta hydrolase, partial	280	7.7E-138;3.6E-99;8.9E-77;9.8E-77;4.4E-76;2.0E-74;1.0E-73;1.1E-73;1.2E-73;2.3E-73;1.2E-72;1.8E-72;1.4E-70;2.4E-70;3.3E-70;4.3E-70;7.8E-70;2.2E-69;2.6E-69;8.9E-69	alpha/beta hydrolase, partial [Arenimonas sp. GDDSR-1]	7.7e-138	237	237	3	239	89.03
MGYP000191308133	lipase family protein	282	2.2E-198;5.3E-156;2.1E-153;8.6E-153;4.6E-152;9.9E-147;1.2E-144;4.1E-144;4.5E-144;1.8E-143;2.6E-143;3.2E-143;5.2E-143;1.3E-142;1.9E-142;2.2E-141;4.4E-141;9.0E-139;3.5E-138;1.3E-137	lipase family protein [Vibrio bivalvicida]	2.2e-198	270	270	13	282	99.26
MGYP000193242467	alpha/beta hydrolase	308	1.7E-218;1.1E-111;1.4E-67;4.3E-67;1.7E-66;6.7E-64;1.1E-63;1.5E-63;3.2E-63;9.8E-63;1.2E-62;2.1E-62;1.7E-61;4.3E-61;9.3E-61;1.5E-59;2.7E-59;3.1E-59;9.6E-59;2.5E-58	alpha/beta hydrolase [Propioniciclava flava]	1.7e-218	308	308	1	308	99.03
MGYP000194165175	alpha/beta fold hydrolase	271	6.0E-113;1.6E-109;6.9E-109;9.8E-109;7.7E-108;7.3E-106;2.1E-103;2.1E-103;2.8E-101;1.7E-100;1.1E-99;4.4E-99;2.2E-98;1.0E-92;1.4E-92;2.6E-92;2.3E-91;5.4E-89;3.5E-88;4.1E-84	alpha/beta fold hydrolase [Huintestinicola butyrica]	6e-113	273	269	6	271	72.12
MGYP000194299525	alpha/beta fold hydrolase	168	6.5E-58;9.9E-58;3.1E-56;4.3E-55;8.3E-55;8.6E-55;8.8E-55;1.1E-54;2.6E-53;3.4E-53;8.3E-31;1.0E-30;1.2E-30;1.5E-29;1.5E-29;5.5E-29;5.9E-29;8.0E-29;1.7E-28;4.6E-28	alpha/beta fold hydrolase [Perlucidibaca aquatica]	6.5e-58	239	161	3	163	73.91
MGYP000194493767	triacylglycerol lipase	311	7.1E-226;1.3E-187;1.8E-187;7.0E-185;8.2E-184;3.9E-153;1.3E-150;2.7E-150;4.9E-146;1.2E-139;1.7E-139;1.7E-139;6.9E-139;9.5E-134;7.8E-133;1.3E-131;1.3E-131;7.9E-131;6.1E-128;1.1E-127	triacylglycerol lipase [uncultured Thalassolituus sp.]	7.1e-226	311	311	1	311	100
MGYP000194513283	alpha/beta-hydrolase	216	2.8E-73;1.5E-70;8.3E-67;2.1E-26;2.4E-26;9.8E-21;3.6E-19;3.8E-19;4.1E-19;9.4E-19;1.1E-18;1.3E-18;8.1E-18;4.0E-17;5.6E-17;1.8E-16;2.1E-16;2.4E-16	alpha/beta-hydrolase [Tilletiopsis washingtonensis]	2.8e-73	345	208	6	213	71.15
MGYP000195951143	MULTISPECIES: alpha/beta hydrolase	262	1.0E-189;5.6E-178;5.6E-178;5.4E-130;1.5E-115;3.3E-102;1.2E-100;1.6E-100;9.5E-100;1.9E-99;1.9E-99;5.4E-99;3.8E-92;2.2E-58;3.1E-58;6.0E-58;1.6E-55;8.3E-53;1.2E-52;2.3E-52	MULTISPECIES: alpha/beta hydrolase [Anaerolinea]	1e-189	262	262	1	262	100
MGYP000196370489	hypothetical protein	190	1.0E-64;5.4E-64;1.4E-62;2.3E-62;2.8E-62;2.1E-61;3.0E-61;3.1E-58;4.7E-58;3.9E-57;1.6E-56;8.8E-56;3.1E-55;4.0E-55;1.1E-54;1.1E-53	hypothetical protein [Glaciimonas sp. PCH181]	1e-64	202	185	1	185	76.22
MGYP000196714356	alpha/beta hydrolase	307	2.0E-39;1.7E-32;2.2E-31;1.7E-30;3.1E-29	alpha/beta hydrolase [Gemmatimonas sp.]	2e-39	329	256	48	301	55.47
MGYP000197077513	triacylglycerol lipase	224	1.8E-87;2.4E-87;2.4E-87;4.2E-85;1.7E-84;4.0E-84;1.1E-82;1.0E-79;2.2E-79;7.0E-79;3.6E-78;4.0E-78;1.0E-77;2.1E-77;5.5E-77;8.8E-77;9.4E-77;1.4E-76;2.0E-76;8.2E-76	triacylglycerol lipase [Nocardioides jensenii]	1.8e-87	229	198	26	223	77.78
MGYP000199113553	alpha/beta fold hydrolase	154	4.5E-41;7.1E-40;4.8E-39;5.9E-39;2.8E-38;6.4E-38;2.0E-37;7.8E-37;1.5E-36;1.6E-36;3.1E-36;3.2E-36;1.8E-35;8.2E-34;6.5E-33;8.2E-33;9.0E-33;1.8E-32;1.8E-32;3.5E-32	alpha/beta fold hydrolase [Fuchsiella alkaliacetigena]	4.5e-41	214	154	3	154	66.23
MGYP000199229499	alpha/beta hydrolase	265	3.1E-67;3.4E-60;1.9E-54;3.9E-54;3.2E-53;3.6E-53;8.0E-53;8.0E-52;2.9E-51;4.0E-51;3.6E-50;1.4E-49;1.4E-49;2.0E-49;1.1E-45;2.1E-45;2.1E-45;2.6E-45;3.1E-45;5.7E-45	alpha/beta hydrolase [Sphingorhabdus sp. EL138]	3.1e-67	264	264	1	264	62.88
MGYP000200001867	alpha/beta fold hydrolase	257	8.6E-90;1.2E-89;2.0E-88;2.0E-88;7.4E-88;1.2E-87;1.6E-87;2.3E-87;4.6E-87;4.6E-87;5.1E-87;5.7E-87;1.8E-86;2.5E-86;2.6E-86;2.6E-86;2.6E-86;2.6E-86;2.8E-86;5.2E-86	alpha/beta fold hydrolase [Tepidiforma sp.]	8.6e-90	252	258	1	256	68.22
MGYP000200347493	alpha/beta fold hydrolase	268	5.8E-76;8.3E-76;1.9E-74;5.4E-74;7.9E-74;2.3E-73;3.1E-73;4.5E-73;2.5E-67;1.4E-66;8.9E-65;1.3E-64;2.3E-64;3.6E-64;2.6E-63;5.2E-63;3.1E-62;1.0E-60;1.6E-60;1.7E-60	alpha/beta fold hydrolase [Thermoflexus sp.]	5.8e-76	264	266	4	268	64.66
MGYP000202047263	lipase family protein	484	0.0E0;0.0E0;0.0E0;0.0E0;1.6E-195;1.6E-91;2.3E-91;5.0E-90;2.8E-89;2.3E-86;5.9E-78;8.9E-68;8.9E-68;1.3E-67;3.4E-67;3.8E-67;4.9E-67;6.8E-67;9.5E-67;4.7E-66	lipase family protein [Anaerovibrio slackiae]	0	484	484	1	484	99.79
MGYP000202124827	alpha/beta fold hydrolase	323	9.0E-25;2.4E-24;4.8E-24;9.1E-23;9.2E-23;3.6E-22;5.6E-17;6.2E-17;7.5E-17;4.1E-16;6.1E-16	alpha/beta fold hydrolase [Geomobilimonas luticola]	9e-25	388	213	95	302	50.7
MGYP000202690953	MULTISPECIES: alpha/beta hydrolase	263	2.5E-30;8.5E-29;3.5E-22;3.9E-18;1.5E-16	MULTISPECIES: alpha/beta hydrolase [unclassified Mycobacterium]	2.5e-30	248	194	12	203	52.58
MGYP000203093079	hydrolase 1, exosortase A system-associated	275	5.9E-83;6.0E-83;2.6E-80;9.7E-80;2.2E-78;3.6E-78;7.2E-78;3.5E-77;6.6E-77;2.4E-75;2.8E-75;2.9E-75;4.4E-75;6.1E-75;8.6E-75;3.3E-74;4.5E-74;5.3E-73;1.4E-72;6.2E-72	hydrolase 1, exosortase A system-associated [Colwellia psychrerythraea]	5.9e-83	286	274	7	268	65.33
MGYP000205618373	hypothetical protein	224	5.4E-65;7.1E-63;7.6E-63;8.9E-63;4.1E-62;5.1E-62;2.4E-61;2.8E-61;2.8E-61;5.7E-61;2.3E-60;6.3E-60;6.5E-60;6.5E-60;7.6E-60;9.2E-60;1.1E-59;5.2E-59;1.5E-57;3.3E-54	hypothetical protein [Rhizobacter sp. J219]	5.4e-65	209	183	39	221	73.22
MGYP000206258140	MULTISPECIES: alpha/beta hydrolase	269	4.7E-126;4.5E-78;4.5E-78;9.0E-78;1.6E-71;2.9E-71;1.4E-70;1.4E-70;1.6E-70;1.6E-70;2.2E-70;2.3E-70;2.3E-70;4.0E-70;7.0E-70;7.4E-70;1.3E-69;1.6E-69;2.2E-69;2.3E-69	MULTISPECIES: alpha/beta hydrolase [Pelagibacter]	4.7e-126	273	269	1	269	76.95
MGYP000208167236	Mbeg1-like protein	547	2.7E-146;5.7E-143;2.0E-70;3.0E-58;7.6E-57;4.1E-54;5.5E-53;2.7E-49;9.0E-45;7.2E-41;9.7E-41;6.6E-40;9.1E-40;1.8E-37;9.0E-37;1.4E-34;3.8E-33;1.3E-32;1.9E-32;4.7E-31	Mbeg1-like protein [Bacillus sp. FJAT-18017]	2.7e-146	536	538	13	543	61.71
MGYP000208592567	alpha/beta hydrolase	262	4.0E-156;2.0E-149;4.5E-142;1.3E-141;1.3E-141;7.4E-141;1.2E-140;2.1E-140;5.2E-140;9.9E-139;4.0E-138;1.5E-136;2.0E-136;1.8E-98;2.2E-98;2.3E-98;4.7E-98;1.8E-97;5.1E-97;5.1E-97	alpha/beta hydrolase [Okeania sp. SIO3I5]	4e-156	256	256	1	256	93.75
MGYP000208594700	alpha/beta hydrolase	221	6.7E-120;1.5E-116;1.7E-115;1.0E-75;2.9E-75;4.0E-75;2.1E-74;2.2E-72;4.4E-72;1.2E-71;2.5E-71;6.7E-71;2.7E-70;4.6E-69;5.0E-69;5.4E-69;1.5E-68;5.4E-68;8.0E-68;6.1E-67	alpha/beta hydrolase [Halanaerobium saccharolyticum]	6.7e-120	221	219	1	219	89.95
MGYP000209221695	alpha/beta-hydrolase	223	3.6E-68;5.5E-51;6.2E-47;2.6E-44;1.3E-43;3.8E-43;5.9E-42;6.1E-42;2.4E-39;1.8E-38;3.1E-38;2.7E-35;3.5E-30;2.9E-29;1.3E-28;5.6E-28;1.7E-27;2.3E-27;1.2E-26;2.4E-26	alpha/beta-hydrolase [Tilletiaria anomala UBC 951]	3.6e-68	311	185	35	219	77.84
MGYP000211003150	alpha/beta hydrolase	295	1.7E-63;1.3E-62;8.5E-45;1.2E-44;1.3E-44;6.5E-44;3.8E-43;1.1E-42;4.0E-42;7.4E-40;1.1E-38;2.9E-38;8.3E-36;7.4E-35;8.6E-35;2.5E-34;2.9E-34;5.6E-34;6.7E-34;2.1E-33	alpha/beta hydrolase [Nitrosomonas nitrosa]	1.7e-63	449	293	9	290	61.09
MGYP000212154935	hypothetical protein	205	5.1E-148;9.9E-146;1.8E-103;4.5E-96;3.5E-95;1.7E-91;3.9E-86;5.4E-79;1.2E-78;1.7E-77;3.0E-77;1.1E-75;4.3E-75;4.3E-75;8.7E-75;1.1E-74;1.5E-74;3.2E-74;5.0E-74;6.1E-74	hypothetical protein [Izhakiella australiensis]	5.1e-148	205	205	1	205	99.02
MGYP000212237012	alpha/beta fold hydrolase	308	1.8E-141;8.1E-136;4.4E-121;2.7E-119;7.8E-119;9.8E-115;3.7E-112;5.9E-111;7.5E-110;9.0E-110;1.3E-109;1.8E-109;4.0E-107;1.3E-105;1.6E-101;4.3E-101;1.8E-100;2.3E-100;3.6E-98;4.7E-98	alpha/beta fold hydrolase [Roseivirga sp. 4D4]	1.8e-141	307	306	3	308	81.7
MGYP000213686946	alpha/beta fold hydrolase	264	2.9E-44;2.0E-29;1.1E-28;8.9E-28;3.1E-26;1.5E-25;9.8E-24;1.4E-22;3.3E-22;3.7E-22;5.4E-22;7.2E-22;7.2E-22;7.2E-22;8.9E-22;1.2E-21;1.4E-21;1.4E-21;1.4E-21;1.4E-21	alpha/beta fold hydrolase [Haliangium ochraceum]	2.9e-44	342	232	24	251	56.9
MGYP000214481149	AcvB/VirJ family lysyl-phosphatidylglycerol hydrolase	227	2.6E-75;2.6E-75;2.5E-73;6.6E-68;2.3E-66;2.3E-66;3.3E-66;2.5E-65;1.8E-64;2.6E-62;3.6E-62;3.6E-62;1.5E-61;1.7E-61;4.3E-61;6.1E-61;8.4E-61;6.8E-60;1.4E-59;1.1E-58	AcvB/VirJ family lysyl-phosphatidylglycerol hydrolase [Pedobacter nototheniae]	2.6e-75	227	212	12	223	73.58
MGYP000216713935	alpha/beta fold hydrolase	340	2.3E-139;2.3E-138;5.5E-138;6.8E-138;8.2E-138;9.7E-138;9.7E-138;4.4E-137;5.4E-137;5.6E-137;7.6E-137;9.5E-136;2.0E-135;3.2E-135;6.3E-135;1.6E-134;1.8E-134;3.1E-134;1.1E-133;5.5E-133	alpha/beta fold hydrolase [Pedococcus dokdonensis]	2.3e-139	330	310	8	317	75.16
MGYP000216842000	alpha/beta fold hydrolase	209	1.2E-29;1.4E-29;1.2E-28;3.5E-28;6.3E-28;5.0E-27;5.2E-27;1.4E-26;1.5E-26;1.7E-26;1.8E-26;1.8E-26;2.1E-26;2.7E-26;3.6E-26;3.9E-26;3.9E-26;4.7E-26;7.2E-26;7.3E-26	alpha/beta fold hydrolase [Rhodoblastus sp.]	1.2e-29	296	177	14	189	54.8
MGYP000218137035	alpha/beta fold hydrolase	284	5.7E-154;2.4E-151;2.4E-114;1.4E-113;1.6E-110;3.0E-110;3.7E-109;8.1E-108;1.6E-107;2.5E-107;5.9E-107;1.2E-106;2.2E-106;4.6E-106;5.3E-106;6.5E-106;8.2E-106;2.2E-105;5.3E-105;2.7E-104	alpha/beta fold hydrolase [Polaribacter pectinis]	5.7e-154	282	279	1	279	86.02
MGYP000218319564	alpha/beta hydrolase	212	1.5E-148;8.1E-80;2.7E-71;1.6E-70;2.1E-68;3.9E-68;8.4E-68;4.6E-67;7.4E-66;3.3E-65;5.2E-64;1.2E-63;1.5E-63;3.2E-60;5.3E-59;9.9E-56;8.1E-55;6.1E-54;9.4E-54;2.3E-52	alpha/beta hydrolase [Actinobaculum sp. oral taxon 183]	1.5e-148	212	212	1	212	100
MGYP000219671299	hypothetical protein	306	1.6E-46;1.5E-39;2.7E-31;4.0E-29;9.5E-27;3.6E-25;2.3E-24;7.9E-24	hypothetical protein [Candidatus Phyllobacterium onerii]	1.6e-46	343	292	9	288	53.08
MGYP000219918320	alpha/beta fold hydrolase	288	4.7E-208;1.7E-49;2.5E-45;8.3E-44;3.0E-43;3.0E-43;4.6E-42;1.9E-40;2.1E-37	alpha/beta fold hydrolase [Teredinibacter haidensis]	4.7e-208	288	288	1	288	100
MGYP000220798778	MULTISPECIES: alpha/beta fold hydrolase	430	2.1E-262;4.5E-257;1.0E-255;1.0E-255;1.6E-255;2.1E-255;6.1E-255;8.6E-255;1.7E-254;3.5E-254;1.0E-253;2.0E-253;2.0E-253;2.9E-253;5.8E-253;8.2E-253;1.2E-252;1.7E-252;2.4E-252;2.4E-252	MULTISPECIES: alpha/beta fold hydrolase [Vibrio]	2.1e-262	430	430	1	430	89.53
MGYP000222854491	alpha/beta fold hydrolase	302	5.5E-224;3.8E-192;1.1E-191;8.5E-176;1.2E-175;2.2E-175;6.2E-175;1.7E-172;6.1E-171;3.3E-170;2.3E-168;9.5E-163;6.1E-133;6.1E-133;6.1E-133;6.1E-133;1.7E-132;1.7E-132;5.0E-132;7.1E-132	alpha/beta fold hydrolase [Colwellia polaris]	5.5e-224	296	294	1	294	100
MGYP000223312433	lipase family protein	305	7.0E-109;1.6E-107;5.0E-106;7.1E-106;1.0E-105;1.4E-105;1.5E-105;2.0E-105;2.1E-105;4.1E-105;4.1E-105;5.8E-105;5.8E-105;5.8E-105;5.9E-105;8.2E-105;8.2E-105;8.5E-104;9.7E-104;9.7E-104	lipase family protein [Bradyrhizobium rifense]	7e-109	305	305	1	304	69.18
MGYP000224048765	alpha/beta hydrolase	263	7.3E-102;2.4E-100;8.0E-99;8.0E-99;1.1E-98;1.1E-98;6.4E-96;4.1E-94;9.4E-93;7.0E-90;2.5E-88;1.4E-87;7.6E-77;8.0E-77;2.0E-76;4.7E-76;4.7E-76;4.9E-76;7.6E-76;1.5E-75	alpha/beta hydrolase [Thalassolituus pacificus]	7.3e-102	261	257	1	257	72.37
MGYP000225562836	alpha/beta fold hydrolase	258	3.3E-97;4.6E-97;1.3E-96;5.3E-96;1.1E-95;2.1E-95;6.1E-95;6.2E-95;3.5E-94;5.0E-94;7.0E-94;1.0E-93;1.4E-93;1.4E-93;2.0E-93;2.0E-93;2.0E-93;2.0E-93;2.8E-93;4.0E-93	alpha/beta fold hydrolase [Tepidiforma sp.]	3.3e-97	252	250	1	249	72
MGYP000225744445	prolyl oligopeptidase family serine peptidase	206	5.5E-148;2.6E-146;3.1E-145;4.2E-143;1.2E-142;9.8E-142;4.0E-141;2.3E-140;3.3E-140;4.7E-140;3.8E-139;1.6E-138;3.6E-135;3.3E-131;1.9E-130;2.7E-130;5.3E-128;2.4E-126;6.8E-126;1.5E-123	prolyl oligopeptidase family serine peptidase [Lactobacillus delbrueckii]	5.5e-148	206	206	1	206	99.51
MGYP000225812865	alpha/beta fold hydrolase	281	2.1E-34;5.7E-34;8.3E-34;1.1E-33;1.3E-33;1.3E-33;1.5E-33;1.6E-33;1.6E-33;1.9E-33;3.1E-33;3.1E-33;6.2E-33;6.8E-33;8.7E-33;8.7E-33;1.2E-32;1.3E-32;1.4E-32;1.7E-32	alpha/beta fold hydrolase [Streptomyces sp. NBC_01343]	2.1e-34	261	222	59	276	56.31
MGYP000225900132	class 3 lipase	221	7.0E-19;7.0E-17;1.1E-16;7.1E-16;9.7E-16	class 3 lipase [Tetraselmis virus 1]	7e-19	295	217	8	213	53
MGYP000226206592	alpha/beta hydrolase	274	8.9E-96;1.1E-91;3.2E-91;1.1E-89;1.5E-89;2.1E-89;6.7E-89;6.7E-81;8.4E-78;4.6E-69;4.4E-58;1.4E-56;1.3E-55;6.3E-55;2.5E-54;9.8E-54;1.4E-53;1.8E-53;2.0E-53;3.4E-53	alpha/beta hydrolase [Baekduia sp.]	8.9e-96	260	261	12	272	70.88
MGYP000226226954	lipase family protein	186	3.1E-38;5.5E-38;1.5E-36;4.9E-34;5.9E-33;1.4E-32;1.6E-32;6.4E-32;1.8E-28;7.9E-26;4.8E-24;1.3E-23;1.0E-22;4.0E-22;3.9E-20;5.3E-20;8.7E-20;1.8E-19;3.0E-19;9.2E-19	lipase family protein [Caballeronia mineralivorans]	3.1e-38	300	181	6	182	61.33
MGYP000226293707	alpha/beta fold hydrolase	175	2.0E-21;5.5E-21;7.6E-21;9.2E-21;6.7E-20;7.2E-19;3.3E-18;3.3E-18;4.7E-18;9.1E-18;1.1E-17;1.3E-17;1.8E-17;1.8E-17;1.9E-17;1.9E-17;2.1E-17;2.2E-17;2.3E-17;2.9E-17	alpha/beta fold hydrolase [Saccharothrix variisporea]	2e-21	325	160	6	161	57.5
MGYP000226295781	alpha/beta hydrolase	176	2.5E-44;8.8E-43;4.5E-42;3.4E-40;3.7E-39;4.2E-37;5.5E-37;7.1E-37;1.2E-36;2.9E-36;1.7E-35;2.1E-35;1.4E-34;6.5E-34;6.7E-33;9.4E-33;1.5E-31;1.8E-31;3.0E-31;1.6E-30	alpha/beta hydrolase [Desulfonema limicola]	2.5e-44	346	171	10	176	66.08
MGYP000226751108	alpha/beta hydrolase	242	5.3E-71;1.6E-42;9.6E-41;3.6E-40;1.4E-39;2.3E-38;7.1E-36;7.6E-35;2.9E-34;6.5E-33;1.4E-32;2.0E-32;1.0E-31;1.1E-31;1.1E-31;1.2E-31;2.7E-31;1.4E-30;5.0E-30;8.2E-30	alpha/beta hydrolase [Yoonia sp. F2084L]	5.3e-71	247	236	1	235	67.37
MGYP000226982741	alpha/beta hydrolase	267	1.2E-78;2.5E-76;4.0E-75;1.6E-74;9.9E-74;1.8E-73;1.9E-73;1.9E-73;4.1E-73;2.1E-72;6.6E-72;1.2E-71;2.0E-71;2.0E-71;3.3E-70;7.6E-70;1.4E-69;1.6E-69;1.8E-69;2.2E-69	alpha/beta hydrolase [Cryomorpha ignava]	1.2e-78	278	254	9	262	67.32
MGYP000229647643	alpha/beta hydrolase	286	3.0E-67;3.2E-66;8.8E-66;2.3E-61;2.8E-60;2.2E-59;1.6E-58;1.7E-58;6.8E-58;1.2E-57;1.4E-57;1.4E-57;3.4E-57;1.9E-56;4.4E-56;3.3E-54;9.9E-53;3.6E-47;4.6E-37;1.8E-36	alpha/beta hydrolase [Alkalilimnicola ehrlichii]	3e-67	285	261	24	282	58.24
MGYP000229845448	alpha/beta fold hydrolase	403	4.5E-179;1.5E-165;3.3E-165;1.9E-163;1.5E-162;3.4E-162;9.6E-162;3.2E-153;4.9E-153;5.6E-152;4.0E-147;1.8E-145;4.6E-144;1.3E-143;3.0E-143;1.1E-142;1.2E-142;1.9E-141;3.2E-141;8.4E-141	alpha/beta fold hydrolase [Oscillatoria sp. PCC 10802]	4.5e-179	457	407	1	403	75.92
MGYP000229919186	MULTISPECIES: 3-oxoadipate enol-lactonase	262	2.6E-183;4.1E-164;6.3E-159;2.1E-157;1.2E-156;1.4E-155;3.2E-152;1.3E-151;1.4E-127;2.8E-127;3.9E-127;1.1E-126;1.1E-126;1.6E-126;1.3E-125;1.8E-125;2.2E-124;2.5E-123;8.6E-122;1.4E-120	MULTISPECIES: 3-oxoadipate enol-lactonase [Marivita]	2.6e-183	262	262	1	262	98.09
MGYP000229922781	lipase family protein	194	2.5E-18;5.0E-18;7.8E-18;6.4E-17;6.7E-17;9.9E-17;5.3E-16;8.2E-16;9.4E-16	lipase family protein [Roseimaritima ulvae]	2.5e-18	319	157	38	192	53.5
MGYP000231428935	alpha/beta hydrolase	271	1.3E-171;4.7E-169;4.7E-169;9.5E-169;1.8E-168;2.6E-168;3.7E-168;4.0E-168;4.3E-168;5.3E-168;5.3E-168;5.7E-168;7.8E-168;1.1E-167;1.1E-167;4.5E-167;6.9E-167;1.2E-166;1.2E-166;1.3E-166	alpha/beta hydrolase [Bradyrhizobium sp. NP1]	1.3e-171	336	270	1	270	94.44
MGYP000231586810	alpha/beta fold hydrolase	306	1.7E-205;3.9E-204;3.2E-140;2.1E-130;7.5E-78;1.2E-76;7.6E-75;3.4E-64;1.4E-61;6.5E-61;1.3E-58;3.1E-57;1.7E-56;7.7E-56;9.1E-56;1.4E-55;1.5E-55;3.2E-55;2.1E-54;4.6E-54	alpha/beta fold hydrolase [Gordonia sp. (in: high G+C Gram-positive bacteria)]	1.7e-205	275	274	33	306	100
MGYP000232760705	alpha/beta hydrolase	257	1.1E-89;3.2E-89;3.2E-89;6.4E-89;1.0E-88;2.7E-88;2.9E-88;3.1E-88;3.7E-88;4.1E-88;4.8E-88;7.4E-88;1.1E-87;1.2E-87;1.5E-87;1.5E-87;1.5E-87;2.1E-87;3.0E-87;3.0E-87	alpha/beta hydrolase [Algoriphagus halophilus]	1.1e-89	260	257	1	254	71.6
MGYP000232876010	lipase family protein	256	3.0E-109;6.1E-103;5.9E-101;7.8E-101;8.3E-101;1.2E-100;1.2E-100;1.3E-100;1.7E-100;1.8E-100;2.4E-100;4.8E-100;3.9E-99;5.5E-99;2.2E-98;4.5E-98;4.9E-98;9.0E-98;1.2E-97;2.0E-97	lipase family protein [Bermanella sp. WJH001]	3e-109	283	241	16	256	81.74
MGYP000232886060	prolyl aminopeptidase	313	3.2E-103;1.8E-102;3.6E-102;5.1E-102;5.1E-102;1.5E-101;2.1E-101;4.2E-101;5.2E-101;8.3E-101;2.1E-100;4.5E-100;1.2E-99;1.4E-99;1.7E-99;1.9E-99;1.9E-99;2.2E-99;2.7E-99;2.8E-99	prolyl aminopeptidase [Nitrosomonas sp. Is37]	3.2e-103	320	312	1	312	64.74
MGYP000232887710	lipase-like	281	2.0E-72;1.9E-50;3.8E-41;8.4E-41;3.4E-39;2.9E-38;1.4E-37;2.8E-37;7.2E-36;8.6E-36;1.9E-33;5.4E-33;5.5E-33;2.1E-32;8.2E-32;8.0E-31;1.8E-30;4.7E-30;4.5E-29;6.5E-29	lipase-like [Nymphaea colorata]	2e-72	287	265	1	265	63.02
MGYP000232914957	alpha/beta hydrolase	365	1.2E-164;1.9E-115;1.6E-107;3.9E-106;3.1E-105;4.4E-105;8.9E-105;1.3E-104;1.4E-103;1.4E-103;3.0E-82;2.3E-58;8.5E-58;2.8E-55;5.6E-55;1.2E-54;1.6E-54;2.5E-54;4.1E-54;7.1E-54	alpha/beta hydrolase [Oricola indica]	1.2e-164	360	347	13	359	79.54
MGYP000235257413	alpha/beta fold hydrolase	254	1.1E-170;1.2E-170;2.0E-51;2.2E-51;5.3E-50;1.4E-49;1.5E-49;3.3E-48;2.0E-47;2.0E-46;6.4E-45;3.0E-40;3.0E-40;1.2E-39;7.7E-39;5.1E-38;2.1E-36;8.0E-36;5.0E-34;9.9E-34	alpha/beta fold hydrolase [Desulfovibrio desulfuricans]	1.1e-170	290	254	1	254	94.88
MGYP000235429528	alpha/beta hydrolase	290	7.4E-109;3.6E-107;2.8E-98;5.9E-91;5.3E-87;4.4E-86;2.5E-85;1.7E-83;2.1E-54;9.3E-50;1.4E-49;1.8E-49;6.3E-49;3.2E-48;3.4E-48;5.7E-48;8.1E-48;8.1E-48;2.3E-47;8.0E-47	alpha/beta hydrolase [Hellea balneolensis]	7.4e-109	292	290	1	290	71.03
MGYP000237364698	lipase family protein	257	1.2E-73;2.5E-69;8.5E-65;3.3E-63;2.8E-57;2.9E-55;3.9E-55;3.8E-45;2.0E-44;5.1E-44;7.2E-44;5.3E-43;6.2E-43;5.6E-42;6.9E-42;7.6E-42;9.9E-41;4.7E-39;2.6E-38;1.0E-37	lipase family protein [Zavarzinella formosa]	1.2e-73	301	259	1	257	62.16
MGYP000237452546	MULTISPECIES: prolyl aminopeptidase	315	1.1E-201;1.7E-201;2.1E-201;9.1E-201;3.6E-200;1.1E-199;2.1E-199;4.0E-199;1.2E-198;1.2E-198;3.5E-198;5.0E-198;2.0E-197;2.0E-197;8.0E-197;8.6E-197;1.2E-196;2.8E-196;3.0E-195;1.2E-194	MULTISPECIES: prolyl aminopeptidase [Paracoccaceae]	1.1e-201	323	314	1	314	88.85
MGYP000237898142	uncharacterized protein GSPATT00021619001	194	2.9E-34;3.2E-29;6.0E-28;1.2E-27;2.8E-27;3.1E-27;5.4E-27;3.3E-26;5.0E-26;1.2E-25;2.4E-25;3.3E-25;3.3E-25;3.3E-25;6.4E-25;2.5E-24;3.6E-24;5.7E-24;3.1E-23;4.9E-23	uncharacterized protein GSPATT00021619001 [Paramecium tetraurelia]	2.9e-34	270	185	4	186	61.08
MGYP000238106784	uncharacterized protein LOC9662095	199	3.4E-66;9.3E-66;2.2E-65;5.8E-65;7.3E-65;1.1E-64;1.1E-64;1.3E-64;1.7E-64;1.8E-64;2.0E-64;2.4E-64;2.4E-64;4.1E-64;4.8E-64;5.1E-64;5.1E-64;5.9E-64;5.9E-64;5.9E-64	uncharacterized protein LOC9662095 [Selaginella moellendorffii]	3.4e-66	781	192	2	193	71.88
MGYP000238371173	prolyl aminopeptidase	315	1.3E-212;2.1E-137;2.4E-135;2.5E-133;1.0E-132;2.1E-132;3.1E-132;1.2E-131;5.0E-131;6.7E-131;9.5E-131;1.3E-130;1.3E-130;1.3E-130;1.3E-130;1.9E-130;2.7E-130;3.8E-130;5.4E-130;1.6E-129	prolyl aminopeptidase [methane-oxidizing endosymbiont of Gigantopelta aegis]	1.3e-212	315	315	1	315	94.6
MGYP000238659161	hypothetical protein	450	2.3E-172;2.5E-167;6.7E-166;3.6E-164;4.9E-164;3.9E-163;8.9E-162;2.6E-157;9.7E-153;2.7E-151;7.6E-146;1.9E-145;3.1E-145;9.0E-144;1.8E-143;1.9E-143;3.3E-143;5.2E-143;1.8E-142;3.5E-142	hypothetical protein [Paenibacillus ginsengarvi]	2.3e-172	449	446	6	448	71.3
MGYP000238761711	alpha/beta fold hydrolase	289	3.4E-99;1.0E-95;9.0E-76;3.3E-73;9.0E-73;1.1E-71;1.8E-69;1.2E-68;2.1E-68;4.4E-66;2.5E-54;1.7E-53;5.5E-51	alpha/beta fold hydrolase [Rubritalea profundi]	3.4e-99	332	279	7	285	67.03
MGYP000240536646	patatin-like phospholipase family protein	178	1.3E-17;1.3E-17;1.3E-17;1.3E-17;1.3E-17;1.3E-17;1.3E-17;1.3E-17;1.3E-17;3.9E-17;1.1E-16	patatin-like phospholipase family protein [Candidatus Accumulibacter cognatus]	1.3e-17	1218	138	2	131	56.52
MGYP000240954010	alpha/beta fold hydrolase	261	2.3E-116;7.9E-92;3.1E-91;2.1E-88;1.6E-87;1.6E-87;1.6E-87;1.9E-87;8.7E-87;9.3E-87;1.2E-86;3.5E-86;3.6E-86;7.5E-86;1.3E-85;2.9E-85;4.0E-85;5.0E-85;6.5E-85;7.1E-85	alpha/beta fold hydrolase [Rubrobacter tropicus]	2.3e-116	289	259	3	261	77.99
MGYP000241291190	alpha/beta hydrolase	203	1.8E-66;1.4E-65;2.1E-65;1.0E-62;2.1E-62;4.2E-62;1.2E-61;9.7E-61;1.5E-59;4.8E-58;6.4E-58;1.6E-56;2.3E-56;2.7E-55;2.1E-54;1.2E-44;3.1E-30;7.6E-26;3.4E-24;4.5E-24	alpha/beta hydrolase [Actinacidiphila acididurans]	1.8e-66	258	207	1	202	68.12
MGYP000244263966	alpha/beta hydrolase	224	2.7e-41	alpha/beta hydrolase [Tengunoibacter tsumagoiensis]	2.7e-41	297	225	1	222	53.78
MGYP000246024216	alpha/beta hydrolase	273	6.2E-123;1.7E-67;1.4E-56;2.0E-53;1.1E-48;1.7E-48;1.5E-46;4.4E-46;9.7E-45;1.7E-44;5.4E-44;7.6E-44;7.6E-44;7.6E-44;1.1E-43;2.1E-43;3.0E-43;8.4E-43;8.4E-43;1.2E-42	alpha/beta hydrolase [Candidatus Paraluminiphilus aquimaris]	6.2e-123	274	268	1	268	76.12
MGYP000246930384	alpha/beta fold hydrolase	301	3.9E-49;3.9E-49;5.6E-47;6.9E-46;1.0E-45;1.0E-45;1.2E-45;1.3E-45;1.5E-45;2.2E-45;2.6E-45;3.3E-45;4.2E-45;5.2E-45;6.2E-45;1.2E-44;1.2E-44;2.3E-44;3.0E-44;3.0E-44	alpha/beta fold hydrolase [Chloroflexus sp. MS-G]	3.9e-49	567	275	25	296	54.55
MGYP000247625712	alpha/beta fold hydrolase	264	6.2E-144;1.1E-139;7.3E-96;5.6E-95;2.6E-94;3.6E-93;3.1E-92;2.0E-91;1.0E-90;3.4E-89;1.7E-85;8.9E-82;1.1E-80;1.6E-77;7.1E-73;4.7E-69;1.6E-67;2.2E-67;2.2E-67;4.3E-67	alpha/beta fold hydrolase [Candidatus Nitrospira neomarina]	6.2e-144	264	264	1	264	88.64
MGYP000249118023	alpha/beta hydrolase	296	1.5E-82;1.4E-76;4.0E-76;4.7E-76;5.5E-76;6.7E-76;1.6E-75;1.9E-75;3.8E-75;3.8E-75;4.4E-75;4.4E-75;7.2E-75;1.0E-74;1.0E-74;1.2E-74;2.4E-74;2.9E-74;3.0E-74;3.0E-74	alpha/beta hydrolase [Azoarcus taiwanensis]	1.5e-82	292	290	7	296	60.69
MGYP000249215605	3-oxoadipate enol-lactonase	262	6.5E-98;3.7E-97;1.1E-96;4.3E-96;8.7E-96;2.0E-94;1.6E-93;2.7E-92;3.8E-92;3.1E-91;4.4E-91;6.2E-91;1.2E-90;5.1E-90;8.3E-89;1.2E-88;1.7E-88;6.5E-88;6.7E-88;8.0E-88	3-oxoadipate enol-lactonase [Roseovarius nubinhibens]	6.5e-98	262	261	1	261	68.2
MGYP000250464866	MULTISPECIES: alpha/beta fold hydrolase	452	0.0E0;7.7E-313;2.2E-312;1.4E-308;1.7E-307;1.9E-306;1.9E-306;2.7E-306;2.8E-306;7.6E-306;3.8E-304;1.0E-303;1.5E-301;6.2E-301;5.1E-300;1.0E-299;5.9E-299;2.3E-298;1.3E-297;8.5E-292	MULTISPECIES: alpha/beta fold hydrolase [unclassified Variovorax]	0	452	452	1	452	100
MGYP000250481110	alpha/beta hydrolase	282	2.8E-80;1.3E-79;8.9E-78;1.6E-77;8.9E-77;3.2E-76;5.1E-76;9.0E-76;9.3E-76;1.6E-75;2.1E-75;2.1E-75;8.3E-75;9.9E-75;4.7E-74;5.1E-74;7.3E-74;1.4E-73;5.4E-73;5.7E-73	alpha/beta hydrolase [Longimicrobium sp.]	2.8e-80	308	274	14	282	64.6
MGYP000253435675	alpha/beta hydrolase	279	5.3E-54;1.2E-53;1.5E-53;1.7E-53;1.2E-52;6.7E-52;4.8E-51;8.5E-51;3.2E-49;5.5E-49;5.5E-49;7.7E-49;1.5E-48;3.1E-48;3.2E-48;6.8E-47;2.6E-46;7.3E-46;3.3E-44;4.6E-44	alpha/beta hydrolase [Thermoflexus sp.]	5.3e-54	282	273	7	277	56.04
MGYP000253530716	lipase family protein	190	2.9E-27;3.3E-27;3.2E-23;2.7E-22;1.3E-21;1.2E-17	lipase family protein [Tetrahymena thermophila SB210]	2.9e-27	312	188	6	189	50
MGYP000255778185	alpha/beta fold hydrolase	282	1.1E-29;6.8E-29;1.2E-28;1.3E-28;3.5E-28;5.5E-28;5.8E-28;1.2E-27;1.3E-27;1.3E-27;1.5E-27;4.6E-27;4.7E-27;4.8E-27;6.3E-27;6.5E-27;7.5E-27;9.3E-27;1.1E-26;1.1E-26	alpha/beta fold hydrolase [Streptomyces sp. WAC06614]	1.1e-29	260	195	81	271	53.33
MGYP000255784548	alpha/beta fold hydrolase	284	6.9E-98;1.5E-53;9.0E-51;2.0E-48;2.6E-48;3.3E-48;3.3E-47;1.5E-46;2.5E-46;3.7E-46;1.8E-45;2.1E-45;2.8E-45;1.2E-44;1.5E-44;2.2E-44;4.4E-44;6.3E-44;1.1E-43;2.0E-43	alpha/beta fold hydrolase [Desulfovermiculus halophilus]	6.9e-98	302	271	13	282	71.59
MGYP000255790709	alpha/beta hydrolase	271	3.6E-199;3.6E-199;6.4E-193;9.6E-189;2.4E-182;6.4E-178;5.2E-141;1.3E-136;9.9E-122;9.3E-120;5.4E-119;5.8E-119;3.1E-118;2.5E-117;1.5E-115;6.3E-82;4.6E-63;1.1E-62;1.3E-62;3.4E-61	alpha/beta hydrolase [Methyloversatilis sp.]	3.6e-199	271	271	1	271	100
MGYP000256727060	alpha/beta fold hydrolase	285	7.8E-69;7.8E-69;6.1E-68;8.7E-68;4.9E-67;4.5E-65;1.5E-60;1.6E-59;1.9E-59;5.4E-59;1.5E-58;6.1E-58;4.0E-53;4.9E-52;2.5E-50;5.2E-50;1.2E-45;1.0E-35;1.7E-35;5.6E-35	alpha/beta fold hydrolase [Actinomyces sp.]	7.8e-69	269	258	19	274	61.24
MGYP000258178158	triacylglycerol lipase	306	9.0E-194;1.4E-190;7.2E-177;9.6E-170;9.1E-163;2.6E-162;1.5E-157;6.6E-154;5.4E-153;1.6E-128;2.0E-122;1.4E-121;2.2E-120;3.6E-98;5.2E-97;1.5E-96;3.5E-96;1.2E-95;1.6E-95;1.9E-94	triacylglycerol lipase [Aquabacterium sp. UBA2148]	9e-194	313	313	1	306	92.97
MGYP000258243593	3-oxoadipate enol-lactonase	253	2.3E-168;4.5E-136;1.1E-78;1.6E-78;3.1E-78;3.1E-78;3.1E-78;6.3E-78;8.9E-78;1.3E-77;1.3E-77;1.3E-77;1.8E-77;1.8E-77;1.8E-77;1.8E-77;2.5E-77;2.5E-77;3.6E-77;3.6E-77	3-oxoadipate enol-lactonase [Limnobacter sp.]	2.3e-168	253	253	1	253	96.84
MGYP000260837774	alpha/beta hydrolase	217	1.3E-104;1.6E-67;1.5E-64;3.7E-64;1.2E-61;1.3E-61;2.5E-61;4.0E-61;2.4E-60;8.1E-59;1.3E-58;2.1E-57;1.2E-56;6.7E-56;1.4E-55;3.4E-55;5.4E-55;4.5E-54;2.7E-52;1.5E-51	alpha/beta hydrolase [Ktedonosporobacter rubrisoli]	1.3e-104	270	217	1	217	79.72
MGYP000260868495	alpha/beta fold hydrolase	255	1.4E-31;9.0E-29;9.0E-29;1.4E-27;1.4E-27;2.3E-26;1.7E-25;2.9E-25;1.1E-24;2.2E-24;1.1E-23;6.7E-23;1.2E-22;5.5E-20;1.2E-19;2.4E-19;1.1E-18;1.2E-18;4.2E-18;4.1E-16	alpha/beta fold hydrolase [uncultured Ilyobacter sp.]	1.4e-31	293	217	34	243	53
MGYP000260956151	alpha/beta fold hydrolase	294	1.4E-141;8.3E-93;9.6E-92;2.1E-91;5.8E-91;1.1E-90;1.1E-90;5.9E-89;3.0E-88;6.3E-88;1.5E-87;7.1E-87;2.8E-86;6.9E-86;7.8E-86;9.7E-86;1.4E-85;5.5E-85;6.5E-85;6.9E-85	alpha/beta fold hydrolase [Aciditerrimonas ferrireducens]	1.4e-141	304	287	9	294	80.84
MGYP000261087079	AcvB/VirJ family lysyl-phosphatidylglycerol hydrolase	249	1.8E-154;1.4E-153;4.3E-153;8.6E-153;2.4E-121;1.4E-65;2.2E-65;4.4E-65;4.6E-65;5.6E-65;8.7E-65;9.3E-65;1.1E-64;1.2E-64;1.2E-64;1.6E-64;1.8E-64;1.8E-64;1.9E-64;1.9E-64	AcvB/VirJ family lysyl-phosphatidylglycerol hydrolase [uncultured Tolumonas sp.]	1.8e-154	250	250	1	249	92.4
MGYP000261138639	alpha/beta fold hydrolase	260	5.9E-188;9.8E-187;4.4E-174;6.3E-174;1.3E-173;2.5E-173;3.6E-173;6.0E-172;1.7E-171;3.5E-171;3.5E-171;4.7E-171;7.0E-171;7.0E-171;4.0E-170;5.7E-170;1.2E-169;3.3E-169;6.4E-167;9.3E-166	alpha/beta fold hydrolase [Enterobacter mori]	5.9e-188	260	260	1	260	100
MGYP000261486223	uncharacterized protein GSPATT00037943001	269	3.7E-45;1.5E-44;1.5E-43;1.3E-42;2.6E-42;1.0E-41;2.4E-40;2.5E-39;9.7E-39;2.0E-38;7.6E-38;1.7E-37;1.8E-37;5.4E-37;9.2E-37;2.2E-36;2.2E-36;3.4E-36;4.9E-36;6.8E-36	uncharacterized protein GSPATT00037943001 [Paramecium tetraurelia]	3.7e-45	295	225	41	252	54.67
MGYP000261607344	alpha/beta fold hydrolase	280	3.1E-187;1.3E-89;9.8E-89;2.8E-88;3.6E-88;2.6E-87;8.3E-87;1.7E-86;1.7E-86;3.1E-86;3.5E-86;8.1E-85;2.2E-84;2.2E-77;1.3E-75;7.9E-73;4.4E-72;5.2E-43;6.7E-39;7.0E-38	alpha/beta fold hydrolase [Paraliomyxa miuraensis]	3.1e-187	370	280	1	280	94.64
MGYP000261687995	uncharacterized protein GSPATT00004456001	284	5.8E-52;1.2E-49;1.4E-42;1.4E-42;5.2E-42;6.1E-41;4.7E-40;3.2E-39;6.9E-37;2.4E-34;1.7E-33;4.2E-33;5.3E-33;8.1E-33;8.1E-32;1.4E-31;1.8E-30;4.0E-30;4.8E-30;1.2E-29	uncharacterized protein GSPATT00004456001 [Paramecium tetraurelia]	5.8e-52	296	255	21	266	56.47
MGYP000263880913	triacylglycerol lipase	249	7.4E-131;1.5E-130;1.0E-128;1.2E-127;3.9E-126;1.9E-125;2.2E-124;2.5E-123;2.7E-123;9.2E-123;1.0E-122;1.3E-122;1.8E-122;2.9E-122;7.3E-122;8.2E-122;1.7E-121;1.8E-121;2.0E-121;2.8E-121	triacylglycerol lipase [Herbaspirillum sp. ST 5-3]	7.4e-131	310	235	15	249	90.64
MGYP000264002563	alpha/beta hydrolase	293	8.7E-129;1.7E-128;2.8E-127;3.8E-127;7.7E-127;2.3E-125;9.3E-125;2.0E-120;3.0E-117;3.1E-117;2.7E-116;1.3E-99;1.4E-99;1.7E-99;2.4E-99;9.9E-99;1.3E-98;1.9E-98;4.3E-98;1.6E-97	alpha/beta hydrolase [Legionella micdadei]	8.7e-129	297	280	11	289	81.07
MGYP000264407822	predicted protein	265	1.7E-44;1.4E-40;1.0E-20;1.0E-20;1.3E-20;1.4E-20;1.4E-20;6.3E-20;1.4E-19;1.5E-19;1.5E-19;3.4E-19;2.3E-18;3.2E-18;3.2E-18;3.2E-18;3.2E-18;3.2E-18;3.2E-18;6.2E-18	predicted protein [Thalassiosira pseudonana CCMP1335]	1.7e-44	514	276	6	262	57.61
MGYP000264540452	alpha/beta fold hydrolase	262	2.7E-48;3.8E-47;7.0E-47;1.9E-46;3.7E-46;7.9E-46;1.5E-45;4.6E-45;8.5E-45;2.0E-44;3.0E-44;4.7E-44;5.9E-44;7.6E-44;8.3E-44;1.2E-43;1.5E-43;4.1E-43;5.8E-43;6.3E-43	alpha/beta fold hydrolase [Luteitalea sp.]	2.7e-48	579	274	4	262	56.93
MGYP000264558197	MULTISPECIES: alpha/beta fold hydrolase	253	4.5E-31;4.5E-30;3.7E-29;8.0E-29;2.2E-28;1.9E-27;2.9E-27;4.3E-27;1.8E-26;5.5E-26;6.7E-26;9.6E-26;1.4E-25;1.9E-25;1.9E-25;2.6E-25;2.7E-25;3.7E-25;3.7E-25;4.2E-25	MULTISPECIES: alpha/beta fold hydrolase [unclassified Archaeoglobus]	4.5e-31	258	248	2	248	50
MGYP000264809200	kynurenine formamidase-like	295	1.5E-211;1.3E-210;1.3E-210;3.0E-135;5.6E-122;3.8E-118;6.2E-103;1.8E-102;1.2E-97;1.8E-96;3.1E-79;3.9E-73;2.9E-72;4.4E-72;5.9E-72;2.3E-71;6.7E-71;5.0E-70;2.1E-69;3.0E-69	kynurenine formamidase-like [Pocillopora damicornis]	1.5e-211	291	289	1	289	100
MGYP000266710732	Mbeg1-like protein	272	1.2E-195;3.6E-195;2.7E-194;1.9E-190;3.2E-183;1.8E-179;3.5E-148;4.3E-148;2.0E-144;8.2E-144;2.3E-143;1.6E-142;2.1E-141;7.3E-132;1.0E-131;1.8E-129;1.9E-122;5.7E-120;3.3E-119;9.5E-119	Mbeg1-like protein [Campylobacter jejuni]	1.2e-195	272	272	1	272	100
MGYP000266781281	alpha/beta hydrolase	263	1.7E-32;5.1E-27;8.1E-26;2.2E-23;4.3E-23;2.2E-22;2.2E-22;1.2E-21;1.3E-21;3.4E-21;4.8E-21;4.8E-21;6.1E-21;3.2E-20;7.1E-18;7.9E-18;7.9E-18	alpha/beta hydrolase [Clostridium acidisoli]	1.7e-32	280	260	10	258	53.46
MGYP000267397652	lipase family protein	536	6.9E-107;6.9E-107;6.9E-107;9.7E-107;1.4E-106;1.9E-106;1.9E-106;2.7E-106;2.7E-106;3.8E-106;3.8E-106;5.4E-106;5.4E-106;7.6E-106;7.6E-106;1.1E-105;1.1E-105;1.5E-105;1.5E-105;3.0E-105	lipase family protein [uncultured Phascolarctobacterium sp.]	6.9e-107	473	471	60	530	57.11
MGYP000267984139	alpha/beta fold hydrolase	247	4.5E-141;4.2E-124;3.4E-122;2.0E-110;1.1E-106;6.2E-92;1.0E-85;2.1E-85;2.1E-85;5.9E-85;8.4E-85;2.5E-84;2.5E-84;3.4E-84;6.8E-84;6.8E-84;7.0E-84;9.7E-84;9.7E-84;9.7E-84	alpha/beta fold hydrolase [Cognatishimia activa]	4.5e-141	261	241	1	241	88.8
MGYP000268182435	alpha/beta fold hydrolase	185	2.5E-78;1.4E-77;2.9E-76;2.1E-57;2.5E-57;9.5E-56;3.8E-55;4.1E-55;7.6E-55;1.1E-54;1.3E-54;1.6E-54;1.6E-54;1.6E-54;2.7E-54;2.9E-54;3.1E-54;3.5E-54;4.3E-54;4.6E-54	alpha/beta fold hydrolase [Patulibacter sp. DM4]	2.5e-78	288	185	1	185	75.68
MGYP000268235992	alpha/beta hydrolase	258	2.6E-165;8.1E-142;1.6E-134;8.1E-106;5.2E-104;9.3E-59;2.9E-56;3.2E-55;6.2E-55;1.2E-53;3.0E-53;9.7E-53;6.0E-52;1.3E-51;9.5E-51;1.5E-50;4.3E-50;1.1E-49;3.8E-42;2.1E-41	alpha/beta hydrolase [Aquibium oceanicum]	2.6e-165	258	258	1	258	96.9
MGYP000269711313	lipase family protein	251	1.1E-57;9.9E-56;1.0E-55;1.8E-54;2.7E-54;5.2E-54;5.8E-54;9.1E-54;1.3E-53;1.5E-53;1.8E-53;2.0E-53;2.5E-53;4.4E-53;4.6E-53;5.3E-53;1.0E-52;1.1E-52;1.3E-52;1.5E-52	lipase family protein [Candidatus Laterigemmans baculatus]	1.1e-57	283	254	4	248	59.45
MGYP000269790359	alpha/beta fold hydrolase	254	2.9E-86;1.7E-85;1.1E-84;1.3E-84;4.0E-84;5.4E-84;5.8E-84;6.6E-84;7.0E-84;7.7E-84;1.1E-83;1.5E-83;1.5E-83;2.1E-83;2.6E-83;3.5E-83;3.8E-83;3.0E-82;3.0E-82;3.9E-82	alpha/beta fold hydrolase [Actinomadura rupiterrae]	2.9e-86	312	258	1	254	68.99
MGYP000270444877	alpha/beta fold hydrolase	266	2.2E-122;3.8E-122;3.9E-117;2.0E-113;2.3E-113;2.3E-112;1.9E-110;1.3E-102;4.8E-101;4.9E-101;8.5E-101;1.4E-100;2.9E-100;8.3E-100;8.3E-100;1.7E-99;1.7E-99;2.5E-99;2.6E-99;4.8E-99	alpha/beta fold hydrolase [Allocatelliglobosispora scoriae]	2.2e-122	268	266	1	266	75.94
MGYP000270759671	lipase domain containing protein	175	1.5E-63;9.5E-22;3.5E-21;2.3E-19;1.6E-18;2.3E-18;2.3E-18;2.4E-18;2.4E-18;2.1E-17;2.1E-17;6.0E-17;6.8E-17;6.9E-17;6.9E-17;7.0E-17;7.0E-17;1.3E-16;1.3E-16;2.4E-16	lipase domain containing protein [Blastocystis sp. subtype 4]	1.5e-63	558	147	19	165	82.99
MGYP000270816701	alpha/beta fold hydrolase	201	1.7E-110;3.5E-108;3.5E-108;1.3E-107;1.4E-107;1.9E-107;2.2E-106;2.3E-106;4.3E-106;2.1E-104;2.5E-104;4.1E-104;1.4E-103;2.4E-103;9.6E-103;1.4E-102;3.9E-102;3.9E-102;3.9E-102;7.9E-102	alpha/beta fold hydrolase [Paenibacillus xylanexedens]	1.7e-110	201	201	1	201	91.04
MGYP000271210383	alpha/beta hydrolase	261	9.7E-92;6.5E-90;1.1E-88;1.5E-88;1.2E-87;9.9E-87;2.8E-86;5.7E-86;1.2E-85;1.6E-85;4.6E-85;6.6E-85;6.6E-85;1.3E-84;3.8E-84;1.1E-83;1.5E-83;6.2E-83;6.2E-83;1.2E-82	alpha/beta hydrolase [Aliiroseovarius sp. M344]	9.7e-92	239	216	46	258	77.78
MGYP000272653130	alpha/beta hydrolase	215	4.6E-32;5.1E-18;1.3E-17;1.4E-17;2.4E-17;2.6E-17;3.0E-17;3.6E-17;4.5E-17;4.9E-17;4.9E-17;5.1E-17;7.1E-17;8.1E-17;8.1E-17;9.5E-17;9.9E-17;1.4E-16;1.4E-16;1.6E-16	alpha/beta hydrolase [Turneriella parva]	4.6e-32	200	187	3	188	56.68
MGYP000272675752	alpha/beta fold hydrolase	319	5.9E-84;3.5E-69;5.6E-66;1.9E-65;3.8E-65;1.2E-64;1.1E-62;4.4E-62;8.1E-59;8.5E-59;3.3E-58;3.4E-58;4.8E-58;6.7E-58;2.2E-55;1.5E-53;1.2E-50;2.3E-50;4.0E-44;5.8E-43	alpha/beta fold hydrolase [Sphingomonas caeni]	5.9e-84	329	312	7	318	58.65
MGYP000272767027	AcvB/VirJ family lysyl-phosphatidylglycerol hydrolase	265	2.9E-53;7.6E-49;2.4E-48;2.7E-48;4.0E-48;9.3E-48;8.3E-47;4.5E-44;5.1E-44;8.9E-44;3.5E-43;1.2E-42;2.0E-42;2.0E-42;3.1E-42;5.6E-42;5.8E-42;1.7E-41;3.1E-41;3.1E-41	AcvB/VirJ family lysyl-phosphatidylglycerol hydrolase [Phenylobacterium sp.]	2.9e-53	249	246	6	245	57.32
MGYP000273881699	alpha/beta hydrolase	272	7.7E-190;7.1E-170;8.6E-155;5.0E-154;4.1E-153;4.8E-152;4.8E-152;9.6E-152;2.7E-151;5.5E-151;7.9E-151;1.6E-150;1.6E-150;1.6E-150;3.2E-150;3.2E-150;1.8E-149;1.8E-149;2.6E-149;3.7E-149	alpha/beta hydrolase [Alteromonas oceani]	7.7e-190	272	272	1	272	96.32
MGYP000274208487	lipase family protein	276	2.6E-149;3.2E-100;9.4E-100;5.2E-99;1.0E-98;2.1E-98;6.0E-98;1.7E-97;4.9E-97;4.9E-97;2.1E-94;3.5E-94;2.4E-93;1.2E-92;1.4E-92;4.4E-92;1.9E-86;7.4E-55;3.4E-52;9.9E-52	lipase family protein [Xylanibacillus composti]	2.6e-149	277	272	1	270	85.66
MGYP000275692798	hypothetical protein	336	5.5E-165;5.1E-150;4.5E-148;1.1E-147;1.9E-147;1.9E-147;3.8E-147;4.3E-147;6.2E-147;1.1E-146;1.5E-146;2.5E-146;3.1E-146;3.1E-146;8.8E-146;1.8E-145;3.6E-145;6.0E-134;5.5E-123;2.4E-122	hypothetical protein [Candidatus Binatus sp.]	5.5e-165	339	309	27	332	81.88
MGYP000276930000	lipase family protein	199	4.5E-26;6.0E-24;1.5E-23;1.5E-22;2.4E-22;4.2E-22;5.0E-22;8.6E-22;1.9E-21;2.5E-21;2.6E-21;2.6E-21;3.0E-21;4.3E-21;4.6E-21;4.6E-21;5.0E-21;7.0E-21;9.4E-21;1.0E-20	lipase family protein [Nitrosomonas sp. Nm132]	4.5e-26	319	196	1	188	51.02
MGYP000279781781	lipase family protein	260	2.1E-17;4.5E-17;5.1E-16;6.3E-16;9.4E-16;9.4E-16	lipase family protein [Hydrogenispora ethanolica]	2.1e-17	246	138	70	206	60.87
MGYP000280006096	putative lipase B precursor	294	3.4E-86;7.6E-84;7.7E-81;1.8E-79;3.1E-76;3.5E-72;2.0E-69;4.7E-68;1.1E-65;8.0E-49;1.3E-33;4.0E-31;6.8E-31;1.5E-30;4.8E-30;8.1E-30;2.9E-29;4.1E-29;4.1E-29;4.1E-29	putative lipase B precursor [Acaromyces ingoldii]	3.4e-86	382	261	1	257	67.82
MGYP000280435899	alpha/beta hydrolase	208	1.2E-140;8.5E-138;1.6E-131;8.6E-129;1.0E-109;1.3E-97;9.1E-75;9.1E-75;6.2E-72;1.2E-65;5.1E-59;3.6E-56;2.5E-52;3.5E-52;3.5E-52;4.9E-52;8.2E-52;1.2E-51;1.6E-51;4.7E-51	alpha/beta hydrolase [Lactobacillus jensenii]	1.2e-140	206	200	1	200	100
MGYP000281515424	alpha/beta hydrolase	261	4.6E-97;5.4E-89;3.0E-87;4.0E-83;1.3E-81;2.4E-81;3.0E-81;4.7E-81;1.0E-79;8.9E-79;4.9E-78;4.1E-77;9.1E-77;1.2E-76;6.4E-76;6.4E-76;1.2E-75;2.3E-75;2.4E-75;2.6E-75	alpha/beta hydrolase [Sterolibacterium denitrificans]	4.6e-97	280	252	8	259	70.24
MGYP000281680234	alpha/beta fold hydrolase	196	1.5E-92;2.6E-91;3.6E-91;4.9E-89;1.7E-82;9.8E-82;8.0E-81;1.3E-63;7.8E-60;2.3E-59;3.3E-59;6.2E-57;1.3E-53;9.8E-47;2.5E-45;3.4E-45;2.4E-44;2.9E-44;3.1E-44;6.8E-43	alpha/beta fold hydrolase [Rhodoluna limnophila]	1.5e-92	196	196	1	196	78.57
MGYP000281760147	3-oxoadipate enol-lactonase	264	8.6E-91;1.2E-85;1.7E-83;2.8E-77;3.3E-76;4.5E-76;8.7E-76;7.0E-75;7.5E-75;9.6E-75;1.1E-74;1.4E-74;1.4E-74;1.5E-74;2.9E-74;3.9E-74;4.0E-74;5.5E-74;6.1E-74;8.0E-74	3-oxoadipate enol-lactonase [Neotabrizicola shimadae]	8.6e-91	259	256	8	262	67.97
MGYP000282069267	alpha/beta fold hydrolase	266	1.1E-123;3.6E-123;6.1E-123;1.2E-122;3.5E-122;7.8E-122;9.8E-120;5.9E-103;5.9E-103;1.0E-98;4.3E-85;7.9E-82;4.7E-80;5.2E-79;5.2E-79;5.2E-79;5.2E-79;6.1E-79;7.4E-79;7.4E-79	alpha/beta fold hydrolase [Pseudoflavonifractor phocaeensis]	1.1e-123	271	265	5	265	76.6
MGYP000282602920	alpha/beta fold hydrolase	260	2.1E-75;1.2E-65;2.1E-63;4.2E-63;8.5E-51;1.0E-43;2.5E-35;5.7E-34;3.1E-33;5.0E-32;6.7E-32;1.3E-31;1.5E-31;2.7E-31;3.5E-31;7.5E-31;1.1E-30;1.4E-30;2.0E-30;2.0E-30	alpha/beta fold hydrolase [Pseudonocardia sulfidoxydans]	2.1e-75	280	251	7	256	66.14
MGYP000282766087	alpha/beta hydrolase	261	3.8E-119;5.4E-114;5.0E-91;3.0E-90;3.4E-87;2.1E-83;1.7E-82;9.0E-81;1.2E-79;4.2E-75;1.3E-74;2.7E-74;3.4E-74;9.3E-74;2.8E-62;1.8E-60;6.1E-33;1.0E-24	alpha/beta hydrolase [Neolewinella persica]	3.8e-119	276	261	1	258	73.56
MGYP000284381785	triacylglycerol lipase	256	6.1E-117;2.3E-95;2.3E-95;3.2E-95;4.5E-95;4.5E-95;4.7E-95;6.4E-95;6.4E-95;6.4E-95;6.6E-95;9.1E-95;9.1E-95;9.1E-95;1.3E-94;1.3E-94;1.3E-94;1.3E-94;1.3E-94;1.3E-94	triacylglycerol lipase [uncultured Ruminococcus sp.]	6.1e-117	445	256	1	256	78.12
MGYP000284722030	alpha/beta hydrolase	279	4.3E-155;1.3E-146;8.3E-146;2.9E-134;7.9E-87;3.9E-86;1.7E-85;4.5E-85;6.1E-84;7.4E-84;1.0E-83;1.4E-83;4.2E-83;4.7E-82;9.7E-82;1.9E-81;3.9E-81;5.5E-81;5.5E-81;1.6E-80	alpha/beta hydrolase [Acinetobacter sp.]	4.3e-155	284	277	1	277	86.64
MGYP000284735410	alpha/beta hydrolase	312	1.3E-121;2.6E-82;2.6E-81;3.7E-81;7.8E-80;2.7E-78;7.3E-78;7.3E-78;1.1E-77;5.9E-77;8.3E-77;9.4E-76;2.3E-75;7.6E-75;1.1E-74;1.1E-74;2.0E-73;1.3E-72;3.3E-70;1.5E-61	alpha/beta hydrolase [Leptospira perolatii]	1.3e-121	309	305	5	309	71.8
MGYP000285185379	MULTISPECIES: hypothetical protein	171	5.4E-56;7.6E-56;2.9E-55;4.5E-55;1.7E-54;8.9E-54;8.9E-54;1.4E-53;3.5E-53;3.9E-53;5.1E-53;6.4E-53;7.2E-53;2.0E-52;2.9E-52;4.1E-52;4.7E-52;1.5E-51;2.2E-51;3.8E-51	MULTISPECIES: hypothetical protein [unclassified Streptomyces]	5.4e-56	328	171	1	171	69.01
MGYP000285979180	alpha/beta fold hydrolase	282	2.3E-205;1.8E-202;1.5E-158;4.3E-110;6.5E-109;9.5E-108;1.5E-107;3.5E-107;5.2E-107;1.5E-105;4.9E-105;2.1E-104;8.0E-104;7.6E-103;2.2E-102;5.4E-102;1.3E-100;7.0E-100;8.3E-100;3.6E-99	alpha/beta fold hydrolase [Polaribacter sp. F158]	2.3e-205	282	282	1	282	98.58
MGYP000287506467	alpha/beta fold hydrolase	305	6.3E-38;9.5E-37;2.4E-36;4.6E-36;4.6E-36;5.1E-36;9.6E-36;9.9E-36;9.9E-36;9.9E-36;1.4E-35;2.2E-35;2.2E-35;2.5E-35;2.7E-35;2.7E-35;4.2E-35;4.2E-35;5.2E-35;5.9E-35	alpha/beta fold hydrolase [Janthinobacterium sp.]	6.3e-38	319	208	97	300	55.77
MGYP000288614401	alpha/beta hydrolase	265	2.5E-146;2.3E-143;6.5E-73;4.3E-70;1.0E-69;7.6E-69;1.1E-68;7.3E-66;2.1E-65;2.1E-65;2.9E-65;2.2E-64;6.6E-64;6.9E-64;5.3E-63;2.2E-62;4.6E-62;1.8E-61;3.4E-61;1.0E-60	alpha/beta hydrolase [Polynucleobacter rarus]	2.5e-146	275	265	1	265	88.3
MGYP000290363133	predicted protein	306	1.1E-69;4.2E-39;4.8E-26;5.7E-19;1.8E-18;3.5E-18;8.0E-16	predicted protein [Phaeodactylum tricornutum CCAP 1055/1]	1.1e-69	538	304	12	301	58.88
MGYP000290532884	MULTISPECIES: alpha/beta fold hydrolase	254	1.8E-152;3.8E-109;7.3E-109;6.1E-106;4.0E-95;3.2E-87;8.1E-83;3.4E-19;3.4E-19;3.4E-19;4.7E-19;6.5E-19;4.6E-18;7.7E-18;1.0E-17;1.9E-17;2.2E-17;7.0E-17;1.3E-16;1.3E-16	MULTISPECIES: alpha/beta fold hydrolase [unclassified Gordonia (in: high G+C Gram-positive bacteria)]	1.8e-152	216	216	39	254	100
MGYP000290549523	alpha/beta hydrolase	229	3.8E-91;4.0E-84;1.0E-78;2.9E-71;3.9E-71;5.9E-70;2.7E-69;5.6E-69;1.1E-68;3.1E-68;1.1E-67;6.5E-67;1.4E-66;5.0E-66;5.8E-66;5.8E-66;8.0E-66;1.1E-65;1.3E-65;1.4E-65	alpha/beta hydrolase [Chryseosolibacter histidini]	3.8e-91	232	224	1	224	75.45
MGYP000290560497	non-ribosomal peptide synthetase	274	9.1E-42;4.2E-41;2.0E-40;2.2E-39;4.1E-37;2.2E-35;1.4E-34;3.0E-33;3.8E-33;7.3E-33;6.6E-32;1.6E-31;1.8E-31;5.4E-31;1.0E-30;1.4E-30;3.2E-30;1.1E-29;5.3E-29;5.3E-29	non-ribosomal peptide synthetase [Xenorhabdus sp. PB62.4]	9.1e-42	3342	275	1	261	54.18
MGYP000292304173	alpha/beta fold hydrolase	183	2.4E-122;3.9E-121;3.9E-121;6.0E-91;5.7E-89;5.7E-89;5.7E-89;1.6E-88;2.8E-83;6.8E-75;1.4E-74;5.5E-74;7.8E-74;1.1E-73;1.1E-73;1.1E-73;2.2E-73;3.1E-73;1.3E-72;1.3E-72	alpha/beta fold hydrolase [Corynebacterium falsenii]	2.4e-122	274	180	2	181	100
MGYP000293313937	alpha/beta fold hydrolase	322	4.5E-37;9.7E-35;1.9E-34;3.3E-34;7.4E-34;1.9E-33;2.3E-33;2.3E-33;9.1E-33;9.5E-33;1.1E-32;1.1E-32;1.2E-32;1.5E-32;2.5E-32;2.6E-32;3.1E-32;4.9E-32;5.0E-32;5.6E-32	alpha/beta fold hydrolase [Rhodoblastus sp.]	4.5e-37	297	241	78	312	51.45
MGYP000293635225	3-oxoadipate enol-lactonase	260	1.9E-184;2.6E-182;5.2E-182;3.1E-135;8.9E-135;1.5E-133;3.0E-133;1.7E-132;4.9E-132;8.1E-131;6.6E-130;9.4E-130;1.6E-128;8.9E-128;1.5E-126;4.2E-126;9.9E-125;1.4E-124;3.9E-124;4.3E-124	3-oxoadipate enol-lactonase [Sulfitobacter pontiacus]	1.9e-184	260	260	1	260	99.62
MGYP000294437255	alpha/beta hydrolase fold domain-containing protein	307	2.3E-208;5.1E-207;6.9E-205;7.5E-205;1.5E-204;1.1E-203;2.3E-203;3.3E-203;6.6E-203;9.4E-203;9.4E-203;2.7E-202;2.7E-202;1.1E-201;1.1E-201;1.6E-201;6.8E-201;1.4E-200;2.8E-200;8.0E-200	alpha/beta hydrolase fold domain-containing protein [uncultured Eubacterium sp.]	2.3e-208	305	304	1	304	96.05
MGYP000296571856	lipase family protein	351	3.7E-223;2.5E-221;1.6E-147;4.4E-141;3.5E-140;1.1E-139;1.4E-139;8.5E-134;1.7E-131;3.7E-130;1.4E-127;2.2E-127;3.0E-127;1.2E-126;1.2E-126;2.8E-126;1.4E-125;4.1E-125;7.3E-125;2.1E-124	lipase family protein [Marinomonas sargassi]	3.7e-223	351	351	1	351	94.87
MGYP000296978161	alpha/beta fold hydrolase	194	3.9E-61;9.0E-61;1.3E-60;1.4E-60;4.0E-60;1.2E-59;1.6E-59;2.0E-59;2.2E-59;2.2E-59;7.5E-59;9.0E-59;1.2E-58;1.2E-58;1.3E-58;1.5E-58;2.1E-58;3.1E-58;3.3E-58;3.5E-58	alpha/beta fold hydrolase [Nakamurella flava]	3.9e-61	272	190	3	188	67.89
MGYP000297034426	alpha/beta fold hydrolase	310	5.8E-220;4.0E-181;9.5E-180;4.5E-178;5.2E-177;2.5E-175;2.9E-165;2.0E-163;6.2E-162;2.6E-161;5.7E-158;6.7E-157;1.7E-153;3.4E-153;8.9E-132;1.7E-131;7.6E-131;1.9E-129;2.7E-129;3.3E-128	alpha/beta fold hydrolase [Phycicoccus sp.]	5.8e-220	310	310	1	310	100
MGYP000297352391	virulence factor family protein	229	5.6E-70;7.5E-69;8.0E-69;1.0E-67;2.4E-65;2.8E-65;9.0E-64;1.3E-63;1.6E-63;1.6E-63;2.1E-63;4.9E-63;6.8E-63;1.4E-62;1.9E-62;2.7E-62;2.9E-62;3.0E-62;3.3E-62;3.8E-62	virulence factor family protein [Ferrigenium kumadai]	5.6e-70	466	201	19	219	74.63
MGYP000297762842	lipase	156	8.2E-38;3.8E-26;5.1E-23;1.3E-22;4.6E-20;7.0E-20;9.1E-20;2.9E-19;2.9E-19;5.1E-19;7.8E-19;9.1E-19;1.6E-18;2.4E-18;3.3E-18;8.1E-18;3.5E-17;1.1E-16;1.1E-16;1.5E-16	lipase [Nymphaea colorata]	8.2e-38	194	151	5	154	62.25
MGYP000300619913	alpha/beta hydrolase	176	3.4E-37;1.5E-36;3.9E-35;2.7E-33;4.3E-31;5.3E-31;7.4E-31;3.5E-29;2.7E-28;1.4E-27;3.8E-27;1.6E-26;4.0E-26;8.3E-26;8.3E-26;8.3E-26;1.1E-25;1.1E-25;1.2E-25;1.6E-25	alpha/beta hydrolase [Stigmatella ashevillena]	3.4e-37	331	172	4	173	62.21
MGYP000300627206	alpha/beta hydrolase	246	9.9E-94;1.4E-93;1.4E-93;6.3E-93;1.1E-92;4.5E-92;4.5E-92;3.7E-91;5.2E-91;1.0E-90;1.5E-90;1.6E-90;2.1E-90;3.0E-90;4.4E-90;8.5E-90;1.3E-89;1.7E-89;1.7E-89;1.7E-89	alpha/beta hydrolase [Nocardioides rotundus]	9.9e-94	265	250	2	245	72
MGYP000301809640	arylformamidase	267	2.1E-189;1.3E-158;4.5E-112;2.1E-75;5.3E-72;2.0E-71;2.0E-68;7.2E-68;2.6E-66;3.6E-65;1.1E-61;4.0E-61;9.1E-60;1.1E-59;3.7E-59;1.9E-58;1.0E-57;3.3E-57;1.2E-56;1.3E-55	arylformamidase [Candida albicans SC5314]	2.1e-189	267	267	1	267	99.25
MGYP000302155180	predicted protein	216	7.5e-33	predicted protein [Thalassiosira pseudonana CCMP1335]	7.5e-33	1888	173	37	208	57.23
MGYP000302208659	MULTISPECIES: alpha/beta fold hydrolase	208	1.7E-50;2.2E-50;3.2E-50;1.5E-49;3.7E-47;3.8E-47;1.2E-45;1.2E-45;2.4E-45;1.5E-43;3.6E-43;5.1E-43;6.2E-43;1.0E-42;1.0E-42;1.2E-42;1.8E-42;8.2E-42;1.0E-41;1.3E-41	MULTISPECIES: alpha/beta fold hydrolase [unclassified Variovorax]	1.7e-50	192	180	1	177	62.78
MGYP000302260692	acylglycerol lipase protein	262	2.3E-101;3.1E-99;3.9E-44;6.6E-41;5.6E-40;1.4E-37;7.2E-33;2.5E-22;5.4E-22;9.7E-22;1.8E-21;2.6E-21;3.1E-21;5.0E-21;9.4E-21;1.0E-20;2.0E-20;2.3E-20;2.3E-20;2.8E-20	acylglycerol lipase protein [Trichomonas vaginalis G3]	2.3e-101	306	254	8	260	73.23
MGYP000302938928	triacylglycerol lipase	301	4.9E-119;6.0E-118;8.5E-118;8.5E-118;1.2E-117;2.4E-117;3.4E-117;3.4E-117;3.4E-117;4.9E-117;9.9E-117;1.3E-116;1.4E-116;1.4E-116;4.0E-116;9.9E-116;1.2E-115;1.4E-115;1.7E-115;1.8E-115	triacylglycerol lipase [Pseudomonas oligotrophica]	4.9e-119	310	304	10	301	73.68
MGYP000302939443	triacylglycerol lipase	337	1.9E-190;3.8E-163;4.7E-159;4.6E-157;4.7E-155;1.3E-154;2.9E-146;1.2E-145;1.2E-145;4.4E-145;6.7E-145;9.5E-145;3.9E-144;7.8E-144;1.6E-143;1.6E-143;3.2E-143;4.3E-143;9.0E-143;1.8E-142	triacylglycerol lipase [Litoribrevibacter albus]	1.9e-190	335	335	3	337	88.96
MGYP000302968109	3-oxoadipate enol-lactonase	260	1.3E-136;1.1E-135;7.0E-134;1.9E-133;1.3E-125;1.3E-86;2.1E-74;7.4E-74;4.2E-73;6.0E-73;6.2E-73;1.8E-72;2.1E-72;2.1E-72;2.2E-72;3.2E-72;8.6E-72;1.4E-71;1.5E-71;1.7E-71	3-oxoadipate enol-lactonase [Aquisalimonas asiatica]	1.3e-136	259	256	1	256	83.59
MGYP000303567847	MULTISPECIES: alpha/beta hydrolase	299	5.3E-52;3.3E-50;3.4E-50;6.6E-50;6.8E-50;3.7E-49;3.7E-49;7.3E-49;9.0E-49;1.0E-48;1.1E-48;1.5E-48;2.1E-48;2.9E-48;6.0E-48;6.0E-48;1.6E-47;3.3E-47;4.4E-47;4.6E-47	MULTISPECIES: alpha/beta hydrolase [unclassified Myxococcus]	5.3e-52	252	245	27	267	60
MGYP000305104980	lipase family protein	205	4.8E-33;3.7E-31;3.7E-31;3.7E-31;3.7E-31;3.7E-31;3.7E-31;3.7E-31;3.7E-31;3.7E-31;3.7E-31;5.1E-31;5.7E-31;3.6E-30;6.0E-30;3.3E-28;7.3E-28;1.0E-27;1.9E-27;3.7E-27	lipase family protein [Paludibaculum fermentans]	4.8e-33	317	192	11	191	56.25
MGYP000306326861	lipase family protein	196	2.7E-18;3.8E-18;1.6E-17;2.1E-17;5.6E-17;7.5E-17;1.1E-16;2.9E-16;6.0E-16;7.2E-16	lipase family protein [Accumulibacter sp.]	2.7e-18	276	135	55	183	62.22
MGYP000308021579	alpha/beta hydrolase	268	3.1E-109;2.3E-103;3.9E-101;6.5E-88;9.6E-88;1.5E-86;8.8E-84;5.6E-82;2.2E-19;7.8E-19;4.7E-18;2.3E-17;2.4E-17;7.8E-17;2.1E-16;2.3E-16;5.4E-16;5.8E-16;5.8E-16;8.0E-16	alpha/beta hydrolase [Syntrophorhabdus aromaticivorans]	3.1e-109	270	253	1	253	70.75
MGYP000308865772	alpha/beta hydrolase	230	9.0E-89;2.2E-87;7.3E-81;2.1E-80;8.5E-80;4.7E-77;1.1E-75;7.8E-71;4.9E-64;2.6E-62;5.2E-62;4.1E-61;1.2E-60;2.4E-60;2.4E-60;1.7E-59;9.4E-59;2.1E-58;4.4E-58;8.6E-58	alpha/beta hydrolase [Rhodohalobacter halophilus]	9e-89	227	226	1	226	74.34
MGYP000309226497	hypothetical protein	415	2.7E-141;1.1E-40;8.2E-40;8.5E-40;3.2E-39;4.2E-39;8.5E-39;4.1E-38;5.3E-38;8.0E-38;2.6E-37;2.9E-37;8.6E-37;1.5E-36;2.5E-36;4.8E-36;5.2E-36;7.1E-36;9.4E-36;1.3E-35	hypothetical protein [Vicingus serpentipes]	2.7e-141	414	416	1	415	69.23
MGYP000309463502	alpha/beta hydrolase	256	8.4E-138;1.3E-55;2.3E-53;4.2E-53;6.3E-53;1.1E-52;1.0E-50;1.2E-50;2.2E-50;1.9E-49;2.4E-49;4.1E-49;7.3E-49;1.0E-48;1.0E-48;9.2E-48;1.2E-47;1.5E-47;1.8E-47;3.2E-47	alpha/beta hydrolase [Microbacterium sp.]	8.4e-138	256	256	1	256	82.03
MGYP000309550220	uncharacterized protein ATNIH1004_001552	184	3.9E-19;1.7E-17;2.1E-17;5.0E-17;1.3E-16;2.0E-16;4.1E-16;7.8E-16;8.2E-16;8.6E-16;9.9E-16	uncharacterized protein ATNIH1004_001552 [Aspergillus tanneri]	3.9e-19	326	171	16	184	53.8
MGYP000310911169	alpha/beta fold hydrolase	245	5.8E-44;2.3E-41;9.7E-40;1.6E-29;4.3E-29;7.0E-27;3.3E-21;3.9E-21;2.7E-19;7.5E-18;1.2E-17;5.4E-17;8.8E-16	alpha/beta fold hydrolase [Clostridium sp. ZS2-4]	5.8e-44	260	226	9	233	56.64
MGYP000311074953	alpha/beta fold hydrolase	260	1.9E-115;8.9E-89;8.9E-89;2.1E-87;5.0E-86;2.2E-84;4.9E-83;9.9E-83;1.2E-82;1.6E-82;4.1E-82;9.6E-82;9.9E-82;1.5E-81;1.9E-81;2.0E-81;2.9E-81;3.0E-81;4.2E-81;7.6E-81	alpha/beta fold hydrolase [Terrimesophilobacter sp.]	1.9e-115	260	259	1	259	77.99
MGYP000311721575	alpha/beta hydrolase	363	2.6E-129;1.1E-125;4.8E-125;6.4E-125;6.4E-125;6.4E-125;1.3E-124;1.9E-124;2.6E-124;2.8E-124;4.4E-124;7.3E-124;2.1E-123;2.2E-123;2.2E-123;3.1E-123;6.1E-123;8.1E-123;8.4E-123;1.2E-122	alpha/beta hydrolase [Micromonospora foliorum]	2.6e-129	442	337	25	359	70.33
MGYP000311775484	alpha/beta hydrolase	275	1.8E-62;1.7E-58;9.7E-58;1.7E-52;3.1E-52;4.9E-52;1.9E-51;2.7E-51;1.4E-42;8.0E-41;8.0E-39;2.5E-33;2.3E-32;2.6E-32;2.7E-32;4.4E-32;5.0E-32;7.0E-32;8.2E-32;1.4E-31	alpha/beta hydrolase [Azospirillum rugosum]	1.8e-62	282	274	1	274	58.03
MGYP000312264958	triacylglycerol lipase	165	6.8E-67;5.0E-46;2.3E-45;4.4E-45;5.7E-45;6.4E-45;8.8E-45;1.3E-44;1.3E-44;1.8E-44;6.6E-44;9.4E-44;2.0E-43;2.7E-43;3.3E-43;4.9E-43;5.3E-43;5.8E-43;6.0E-43;7.4E-43	triacylglycerol lipase [Rubricoccus marinus]	6.8e-67	229	138	27	164	81.88
MGYP000312310329	alpha/beta hydrolase	281	7.3E-98;1.7E-95;2.5E-92;1.1E-90;7.2E-90;3.8E-89;7.4E-89;2.4E-87;2.6E-87;1.0E-86;1.0E-86;1.5E-86;1.8E-85;2.0E-85;1.1E-83;3.5E-82;1.2E-78;1.7E-78;3.2E-74;4.0E-72	alpha/beta hydrolase [Oceanicoccus sp. KOV_DT_Chl]	7.3e-98	428	253	26	278	71.15
MGYP000314728577	alpha/beta fold hydrolase	255	6.2E-88;5.9E-86;3.1E-85;9.3E-85;6.2E-84;2.1E-83;2.1E-83;2.4E-83;3.5E-83;1.2E-81;1.6E-81;1.9E-81;3.5E-81;3.5E-81;4.0E-81;1.6E-80;1.6E-80;3.2E-80;4.5E-80;4.5E-80	alpha/beta fold hydrolase [Hahella ganghwensis]	6.2e-88	257	255	1	255	67.06
MGYP000315166424	alpha/beta hydrolase	230	4.9E-70;5.9E-70;2.1E-68;2.3E-68;7.4E-68;3.2E-67;7.5E-67;8.7E-67;1.1E-66;1.8E-66;1.8E-66;2.1E-66;2.3E-66;3.4E-66;3.6E-66;4.8E-66;8.8E-66;2.0E-65;2.1E-65;2.2E-65	alpha/beta hydrolase [Pontibacter aquaedesilientis]	4.9e-70	232	226	1	226	66.81
MGYP000315200422	alpha/beta hydrolase	240	7.4E-62;3.0E-61;1.2E-60;1.5E-56;2.0E-56;2.2E-56;4.1E-56;2.1E-55;2.3E-55;3.9E-55;6.6E-55;6.6E-55;9.3E-55;1.4E-54;1.6E-54;1.6E-54;2.0E-54;2.8E-54;5.3E-54;5.6E-54	alpha/beta hydrolase [uncultured Pontibacter sp.]	7.4e-62	232	235	6	240	61.28
MGYP000315343877	alpha/beta hydrolase	249	2.1E-110;1.4E-108;5.7E-108;8.1E-108;8.1E-108;1.2E-107;1.6E-107;1.7E-106;2.8E-106;6.9E-106;7.6E-106;1.1E-105;1.1E-105;1.5E-105;1.5E-105;1.5E-105;2.0E-105;2.2E-105;2.2E-105;2.2E-105	alpha/beta hydrolase [uncultured Capnocytophaga sp.]	2.1e-110	254	246	3	248	78.05
MGYP000315410605	alpha/beta hydrolase	308	1.6E-98;1.6E-98;1.9E-91;2.9E-90;1.8E-88;2.1E-87;1.5E-68;9.0E-67;1.4E-65;2.7E-65;2.1E-63;1.9E-60;8.2E-59;9.7E-59;1.9E-58;1.9E-58;2.7E-58;4.5E-58;6.3E-58;8.8E-58	alpha/beta hydrolase [Paucibacter sp. KBW04]	1.6e-98	508	314	1	308	67.2
MGYP000321263391	MULTISPECIES: alpha/beta hydrolase	324	2.0E-227;5.8E-227;8.3E-227;1.2E-226;1.7E-226;2.4E-226;3.4E-226;1.4E-225;2.8E-225;1.2E-217;3.7E-214;1.1E-213;1.1E-213;1.7E-210;2.0E-209;4.2E-204;5.3E-191;2.0E-186;2.8E-186;1.1E-185	MULTISPECIES: alpha/beta hydrolase [Gordonia]	2e-227	324	324	1	324	100
MGYP000321677501	alpha/beta hydrolase fold domain-containing protein	302	3.3E-205;1.6E-203;3.0E-201;1.2E-200;7.1E-200;6.6E-196;8.0E-73;6.5E-72;9.1E-72;3.1E-54;2.9E-50;1.8E-47;3.8E-47;1.4E-46;2.0E-46;2.0E-46;2.8E-46;3.1E-46;8.4E-46;1.0E-45	alpha/beta hydrolase fold domain-containing protein [Neisseria sp. HMSC70E02]	3.3e-205	279	279	24	302	100
MGYP000322992924	alpha/beta hydrolase	260	1.5E-57;2.0E-56;1.3E-55;4.7E-55;8.3E-55;2.4E-54;6.0E-54;1.3E-53;1.6E-53;3.3E-53;3.5E-53;3.7E-53;4.4E-53;4.5E-53;8.8E-53;9.1E-53;1.7E-52;1.7E-52;2.1E-52;3.5E-52	alpha/beta hydrolase [Pontibacter actiniarum]	1.5e-57	238	227	35	259	63.88
MGYP000324008735	3-oxoadipate enol-lactonase	266	3.1E-167;2.4E-164;8.0E-163;1.1E-162;3.3E-162;1.9E-161;1.6E-160;1.0E-156;1.8E-150;1.8E-150;7.2E-150;4.8E-148;4.8E-148;4.8E-148;4.1E-147;4.1E-147;1.8E-146;1.4E-145;1.4E-145;2.6E-145	3-oxoadipate enol-lactonase [Pseudooceanicola onchidii]	3.1e-167	262	261	1	261	94.25
MGYP000324210099	uncharacterized protein MJAP1_000004	193	1.4E-109;8.3E-108;5.6E-71;1.6E-66;6.4E-65;3.0E-61;4.2E-61;5.7E-57;2.2E-56;1.9E-55;1.0E-54;1.4E-52;1.4E-51;2.1E-51;1.6E-50;2.6E-48;3.0E-48;3.9E-48;7.0E-48;7.2E-48	uncharacterized protein MJAP1_000004 [Malassezia japonica]	1.4e-109	262	193	1	193	88.6
MGYP000324279405	alpha/beta fold hydrolase	318	4.7E-92;1.2E-20;1.4E-18;1.9E-18;2.5E-18;3.5E-18;3.6E-18;4.8E-18;4.9E-18;1.2E-17;1.7E-17;3.3E-17;6.3E-17;8.4E-17;1.3E-16;4.0E-16;6.7E-16	alpha/beta fold hydrolase [Spongiibacter thalassae]	4.7e-92	249	240	66	305	70
MGYP000324301107	predicted protein	269	6.0E-124;3.9E-35;7.8E-23	predicted protein [Phaeodactylum tricornutum CCAP 1055/1]	6e-124	448	272	1	268	79.04
MGYP000325949621	lipase	309	1.9E-101;2.7E-101;2.7E-101;6.4E-99;2.6E-98;2.6E-98;7.3E-98;1.7E-96;2.7E-95;1.2E-94;2.4E-90;5.7E-89;2.9E-84;6.3E-82;1.2E-80;2.3E-72;5.0E-72;1.7E-71;2.7E-68;4.8E-68	lipase [Nocardia sp.]	1.9e-101	322	266	42	307	69.17
MGYP000326058725	hypothetical protein H310_06076	222	3.1E-25;3.9E-23;8.4E-20;3.7E-18;4.0E-18;7.2E-18;7.2E-18;7.9E-18;8.4E-18;9.9E-18;1.2E-17;1.9E-17;1.9E-17;4.8E-17;1.3E-16;1.6E-16;1.7E-16;3.0E-16;3.1E-16;5.4E-16	hypothetical protein H310_06076 [Aphanomyces invadans]	3.1e-25	502	176	18	188	56.82
MGYP000326954351	lipase family protein	246	1.4E-36;1.8E-34;6.7E-21;4.5E-18;3.2E-16;9.6E-16;9.9E-16	lipase family protein [Pseudohongiella sp. O18]	1.4e-36	239	193	47	237	59.59
MGYP000326957420	alpha/beta hydrolase	252	1.2E-75;1.8E-75;2.6E-73;6.1E-72;2.0E-68;3.7E-62;7.3E-49;3.8E-44;8.0E-44;1.6E-43;6.6E-43;1.3E-42;2.7E-42;3.7E-42;5.2E-42;7.7E-42;1.0E-41;1.0E-41;1.0E-41;1.5E-41	alpha/beta hydrolase [Variovorax sp. dw_954]	1.2e-75	273	252	1	249	60.32
MGYP000328762104	lipase family protein	280	1.1E-22;7.7E-22;1.5E-19;1.5E-19;4.0E-19;5.7E-19;8.5E-19;1.5E-18;1.5E-18;1.5E-18;2.0E-18;2.0E-18;2.4E-18;2.9E-18;2.9E-18;3.0E-18;5.6E-18;1.5E-17;1.5E-17;2.0E-17	lipase family protein [Paenibacillus marchantiophytorum]	1.1e-22	261	197	82	271	50.76
MGYP000329501520	lipase family protein	185	2.8E-21;3.9E-19;3.2E-18;1.2E-17;2.3E-17;3.2E-17;3.6E-17;1.7E-16;6.1E-16;6.1E-16	lipase family protein [Paenibacillus sp. FSL R7-277]	2.8e-21	266	181	9	185	52.49
MGYP000330204346	alpha/beta fold hydrolase	257	1.6E-154;5.0E-146;1.3E-139;4.4E-131;4.0E-127;1.0E-126;1.4E-126;3.0E-126;3.0E-126;4.5E-126;4.6E-126;6.1E-126;6.6E-126;9.0E-126;1.2E-125;1.8E-125;1.8E-125;1.9E-125;2.6E-125;2.7E-125	alpha/beta fold hydrolase [Flavicella sediminum]	1.6e-154	257	257	1	257	93
MGYP000332801492	alpha/beta fold hydrolase	253	2.1E-118;1.1E-108;1.3E-107;1.8E-107;2.0E-104;8.1E-104;1.6E-103;3.3E-103;3.3E-103;2.3E-96;3.2E-96;4.6E-96;3.7E-95;1.2E-88;1.8E-88;2.9E-87;1.3E-85;3.9E-85;2.3E-81;4.8E-81	alpha/beta fold hydrolase [Taishania pollutisoli]	2.1e-118	253	253	1	253	78.26
MGYP000333151349	lipase family protein	194	1.8e-37	lipase family protein [Crateriforma conspicua]	1.8e-37	277	167	1	166	61.68
MGYP000334557428	alpha/beta hydrolase	263	3.3E-84;2.9E-82;9.1E-62;3.5E-61;1.5E-60;1.6E-60;2.0E-60;4.4E-60;5.6E-60;6.0E-60;1.6E-59;2.4E-59;2.8E-59;3.1E-59;6.6E-59;6.8E-59;5.9E-58;7.3E-58;1.1E-57;1.1E-57	alpha/beta hydrolase [Chengkuizengella sp. 2205SS18-9]	3.3e-84	264	257	4	260	68.48
MGYP000334661863	alpha/beta fold hydrolase	274	3.1E-63;6.1E-36;6.5E-36;8.6E-36;8.9E-36;1.2E-35;6.0E-35;1.4E-34;2.7E-34;3.8E-34;3.8E-34;7.5E-33;1.0E-31;1.7E-31;1.9E-28;3.0E-28;3.8E-28;4.0E-28;7.9E-28;7.9E-28	alpha/beta fold hydrolase [Haliangium ochraceum]	3.1e-63	342	239	14	249	65.27
MGYP000335375934	alpha/beta hydrolase	436	4.7E-132;6.0E-82;1.8E-80;1.9E-80;5.1E-80;7.0E-80;2.0E-79;2.0E-79;2.7E-79;4.1E-79;2.2E-78;3.1E-78;3.9E-77;4.2E-77;4.2E-77;6.5E-77;9.7E-77;1.2E-75;1.6E-75;1.7E-75	alpha/beta hydrolase [uncultured Paraglaciecola sp.]	4.7e-132	424	402	34	429	70.9
MGYP000335686484	alpha/beta fold hydrolase	475	2.6E-103;3.4E-100;1.1E-99;1.1E-97;1.1E-97;1.1E-97;8.6E-97;1.6E-96;4.0E-96;7.9E-96;1.7E-95;2.9E-95;6.4E-95;6.8E-95;8.4E-94;1.4E-93;8.8E-93;1.4E-92;1.0E-90;1.3E-90	alpha/beta fold hydrolase [Embleya hyalina]	2.6e-103	479	482	3	475	54.56
MGYP000336042228	alpha/beta fold hydrolase	381	1.2E-87;5.9E-77;7.6E-73;2.0E-70;3.9E-48;4.2E-47;4.8E-45;5.0E-45;1.7E-44;8.1E-44;1.5E-43;3.1E-43;3.3E-43;5.6E-43;6.1E-43;1.2E-42;2.4E-41;7.0E-41;8.9E-41;1.6E-40	alpha/beta fold hydrolase [Labilithrix luteola]	1.2e-87	344	314	76	379	61.78
MGYP000337589614	alpha/beta fold hydrolase	229	4.5E-83;1.5E-82;3.1E-81;1.6E-80;4.2E-80;1.4E-79;1.9E-79;1.8E-78;2.0E-78;2.1E-78;3.7E-78;3.7E-77;3.7E-77;5.2E-77;7.4E-77;7.5E-77;1.6E-76;1.8E-75;2.6E-75;3.5E-75	alpha/beta fold hydrolase [Edaphobacter aggregans]	4.5e-83	320	228	2	229	72.81
MGYP000337595820	alpha/beta fold hydrolase	272	3.9E-111;9.3E-107;4.4E-102;1.8E-101;1.6E-99;2.0E-82;4.5E-81;4.1E-79;5.1E-79;1.7E-78;7.8E-78;2.1E-76;2.7E-76;4.2E-76;6.2E-76;8.2E-76;1.3E-75;2.2E-75;3.4E-75;9.9E-75	alpha/beta fold hydrolase [Williamwhitmania taraxaci]	3.9e-111	302	260	8	267	78.46
MGYP000337753945	alpha/beta fold hydrolase	265	1.2E-137;1.6E-135;2.2E-135;6.4E-135;1.3E-134;2.8E-134;4.1E-131;4.4E-119;1.1E-117;2.2E-117;2.2E-117;4.5E-117;1.5E-115;1.2E-114;2.5E-114;5.2E-113;2.3E-112;2.5E-112;6.7E-110;6.2E-100	alpha/beta fold hydrolase [Caballeronia sp. LZ043]	1.2e-137	265	261	1	261	83.52
MGYP000338746873	alpha/beta hydrolase	231	8.0E-126;5.4E-124;5.4E-124;7.6E-124;3.1E-123;4.4E-123;4.4E-123;1.8E-122;5.1E-122;7.3E-122;1.0E-121;1.0E-121;3.0E-121;8.5E-121;1.4E-119;5.7E-119;1.2E-118;9.4E-118;1.9E-117;2.7E-117	alpha/beta hydrolase [Achromobacter marplatensis]	8e-126	231	230	1	230	89.57
MGYP000340005815	alpha/beta hydrolase	273	4.7E-205;6.7E-205;1.3E-204;1.3E-204;3.9E-204;5.5E-204;7.8E-204;7.8E-204;1.1E-203;2.2E-203;3.2E-203;3.7E-202;6.3E-169;4.0E-94;8.1E-94;8.1E-94;1.1E-93;1.6E-93;4.6E-93;4.6E-93	alpha/beta hydrolase [Negativicoccus succinicivorans]	4.7e-205	273	273	1	273	98.53
MGYP000340556179	alpha/beta hydrolase	259	5.8E-63;5.8E-62;8.5E-62;8.5E-61;1.7E-59;1.7E-58;3.9E-58;4.6E-58;2.1E-57;1.2E-56;4.5E-56;6.6E-55;5.8E-54;5.5E-53;1.6E-52;2.8E-52;1.1E-51;2.0E-47;3.8E-45;1.7E-40	alpha/beta hydrolase [Zeimonas sediminis]	5.8e-63	263	259	1	253	62.55
MGYP000340786736	lipase family protein	186	2.9E-22;4.1E-22;4.1E-22;2.2E-21;3.1E-21;4.9E-21;6.9E-21;1.0E-19;3.2E-19;5.3E-19;7.6E-19;1.9E-18;2.8E-18;7.0E-18;3.9E-17;1.1E-16;1.3E-16;2.2E-16	lipase family protein [Hahella sp. KA22]	2.9e-22	269	149	20	165	57.05
MGYP000342008908	alpha/beta hydrolase	228	2.7E-80;5.4E-78;1.0E-77;3.0E-77;1.7E-76;9.2E-76;1.0E-75;1.3E-75;3.3E-74;3.7E-73;3.8E-73;1.0E-72;2.9E-71;1.9E-68;1.0E-67;1.3E-66;3.6E-66;1.1E-65;3.1E-65;4.3E-65	alpha/beta hydrolase [Kordia jejudonensis]	2.7e-80	228	224	4	227	68.75
MGYP000343390063	lipase family protein	227	5.4E-84;4.3E-81;7.4E-77;2.0E-74;2.8E-74;8.1E-74;8.1E-74;2.3E-73;3.3E-73;6.5E-73;9.7E-72;1.5E-67;5.9E-67;9.7E-65;4.6E-30;1.6E-29;2.8E-29;3.1E-29;8.4E-29;8.4E-29	lipase family protein [Ligaoa zhengdingensis]	5.4e-84	225	222	3	223	72.52
MGYP000344534071	T9SS type A sorting domain-containing protein	631	0.0E0;0.0E0;0.0E0;6.7E-90;1.8E-89;2.0E-89;7.7E-89;5.8E-88;5.8E-88;8.2E-88;1.7E-87;2.0E-87;2.2E-87;4.4E-87;6.2E-87;1.5E-86;2.4E-86;2.4E-86;2.4E-86;3.4E-86	T9SS type A sorting domain-containing protein [Aureispira sp. CCB-QB1]	0	631	632	1	630	90.03
MGYP000344558047	triacylglycerol lipase	172	2.5E-96;2.5E-96;5.0E-96;7.1E-96;1.4E-95;2.0E-95;2.0E-95;2.9E-95;2.9E-95;8.2E-95;8.2E-95;1.2E-94;1.2E-94;1.2E-94;9.4E-94;1.9E-93;3.8E-93;3.8E-93;3.8E-93;5.4E-93	triacylglycerol lipase [Lachnospira eligens]	2.5e-96	397	172	1	172	89.53
MGYP000346971116	MULTISPECIES: alpha/beta fold hydrolase	193	2.1E-113;1.8E-111;1.3E-77;1.4E-72;1.8E-58;2.5E-58;1.8E-54;3.5E-51;7.4E-51;4.7E-49;9.2E-49;1.3E-48;1.3E-48;3.7E-48;3.7E-48;4.5E-48;1.5E-47;1.8E-47;2.5E-47;3.6E-47	MULTISPECIES: alpha/beta fold hydrolase [unclassified Lentimonas]	2.1e-113	190	189	1	189	91.01
MGYP000347109053	adenylate/guanylate cyclase domain-containing protein	443	7.0E-139;2.3E-137;2.6E-137;6.9E-137;1.5E-136;3.0E-136;7.5E-136;2.4E-135;8.5E-135;1.2E-134;1.2E-134;2.0E-134;4.9E-134;1.1E-133;1.4E-133;1.6E-133;2.0E-133;2.0E-133;2.1E-133;3.0E-133	adenylate/guanylate cyclase domain-containing protein [Bradyrhizobium sp. 2S1]	7e-139	436	432	13	442	67.36
MGYP000347122215	lipase family protein	276	3.3E-47;1.7E-45;4.1E-43;4.1E-43;8.2E-43;1.2E-42;2.2E-42;3.2E-42;6.3E-42;3.2E-41;5.3E-41;6.1E-41;6.0E-40;6.0E-40;7.8E-40;3.1E-39;5.1E-39;5.7E-39;6.2E-39;7.3E-39	lipase family protein [Pseudanabaena sp. PCC 6802]	3.3e-47	265	257	14	268	55.25
MGYP000347602153	uncharacterized protein CHLRE_01g002400v5	218	3.5E-21;2.7E-18;5.5E-18;1.2E-17;2.1E-17;2.5E-17;6.0E-17;6.9E-17;6.9E-17;8.4E-17;1.2E-16;1.6E-16;1.8E-16;1.9E-16;2.2E-16;2.6E-16;3.1E-16;4.8E-16;8.1E-16;8.6E-16	uncharacterized protein CHLRE_01g002400v5 [Chlamydomonas reinhardtii]	3.5e-21	229	129	77	196	58.91
MGYP000350397512	lipase	226	7.5E-121;1.6E-112;2.6E-108;1.7E-101;2.1E-101;3.6E-101;2.4E-100;7.4E-100;4.0E-97;8.8E-97;1.2E-96;1.6E-96;5.0E-94;2.1E-93;1.8E-89;3.1E-89;3.5E-89;1.1E-88;3.1E-87;3.5E-87	lipase [Nocardioides marmorisolisilvae]	7.5e-121	355	223	1	223	88.34
MGYP000350739679	chitobiase/beta-hexosaminidase C-terminal domain-containing protein	264	2.5E-30;1.1E-29;1.5E-29;5.5E-28;9.5E-27;4.7E-24;6.5E-22;6.5E-22;2.2E-21;3.1E-21;1.9E-20;2.4E-20;3.7E-20;5.1E-20;5.5E-20;6.4E-20;2.4E-19;2.6E-19;2.8E-19;3.0E-19	chitobiase/beta-hexosaminidase C-terminal domain-containing protein [Nevskia sp.]	2.5e-30	466	257	26	261	50.58
MGYP000352369958	lipase family protein	196	1.0E-20;1.1E-19;1.9E-19;3.7E-19;5.1E-19;1.4E-18;2.0E-18;4.9E-18;7.5E-18;9.9E-18;7.1E-17;1.1E-16;1.3E-16;1.3E-16;3.0E-16;4.6E-16;8.6E-16	lipase family protein [Mycobacterium sp. ACS4054]	1e-20	264	193	9	194	50.26
MGYP000352449496	MULTISPECIES: lipase family protein	204	1.1E-20;1.2E-20;2.4E-20;3.3E-20;4.1E-20;4.6E-20;6.7E-20;1.3E-19;1.3E-19;1.3E-19;1.4E-19;1.8E-19;3.5E-19;4.1E-19;4.6E-19;5.4E-19;9.4E-19;1.6E-18;2.2E-18;2.3E-18	MULTISPECIES: lipase family protein [unclassified Pseudoalteromonas]	1.1e-20	273	152	35	178	57.24
MGYP000352451312	alpha/beta fold hydrolase	307	5.0E-224;1.5E-130;1.7E-129;8.7E-124;2.6E-78;2.0E-75;4.7E-74;3.0E-72;3.6E-70;1.4E-68;5.3E-67;2.3E-66;1.7E-64;2.8E-63;3.1E-62;3.6E-55;1.3E-53;1.9E-53;6.1E-53;5.7E-52	alpha/beta fold hydrolase [uncultured Gordonia sp.]	5e-224	307	307	1	307	100
MGYP000353592577	alpha/beta hydrolase	231	3.4E-78;1.2E-75;5.8E-75;6.7E-75;2.0E-73;6.1E-73;6.2E-73;1.6E-57;2.6E-50;6.7E-50;1.2E-49;5.1E-49;5.5E-49;5.5E-49;7.5E-48;1.4E-47;2.7E-47;3.1E-45;4.7E-45;2.4E-44	alpha/beta hydrolase [Vibrio aquaticus]	3.4e-78	518	231	1	231	70.56
MGYP000353730860	alpha/beta hydrolase	261	1.9E-111;2.1E-110;2.6E-110;5.2E-110;8.5E-110;1.0E-109;1.2E-109;1.2E-109;1.5E-109;1.7E-109;2.4E-109;3.3E-109;3.5E-109;7.0E-109;7.0E-109;7.0E-109;9.9E-109;1.4E-108;1.4E-108;1.4E-108	alpha/beta hydrolase [Gillisia lutea]	1.9e-111	262	261	1	261	81.61
MGYP000355232520	alpha/beta fold hydrolase	263	5.8E-94;5.8E-94;2.3E-93;3.0E-89;1.2E-24;1.1E-22;5.6E-22;1.0E-21;7.4E-21;1.5E-18;1.7E-18;2.0E-18;2.3E-18;1.5E-17;2.7E-17;3.1E-17;3.7E-17;4.1E-17;4.9E-17;5.7E-17	alpha/beta fold hydrolase [Tepidiforma sp.]	5.8e-94	261	260	1	260	66.54
MGYP000355302562	alpha/beta hydrolase	248	1.9E-79;6.1E-79;9.8E-79;1.4E-78;1.4E-78;2.3E-77;3.2E-77;9.1E-77;2.6E-76;2.1E-74;3.7E-74;5.3E-74;1.5E-73;4.2E-73;2.2E-70;6.3E-70;1.8E-69;3.2E-68;7.2E-31;5.3E-30	alpha/beta hydrolase [Polyangium aurulentum]	1.9e-79	286	259	1	248	66.41
MGYP000355821289	predicted protein	396	1.7E-122;1.2E-76;1.8E-25;7.5E-25;2.7E-24;4.0E-23;1.5E-22;2.6E-22;3.2E-22;3.7E-22;6.5E-21;1.3E-20;1.9E-20;3.2E-20;9.3E-20;1.9E-19;2.3E-19;3.1E-19;3.1E-19;3.7E-19	predicted protein [Phaeodactylum tricornutum CCAP 1055/1]	1.7e-122	538	398	1	387	69.1
MGYP000358078323	MULTISPECIES: alpha/beta hydrolase	257	2.9E-31;8.1E-31;2.2E-30;6.2E-30;7.5E-30;5.8E-26;5.3E-24;4.9E-23;1.4E-22;1.4E-22;1.8E-22;1.9E-22;2.4E-22;2.8E-22;9.4E-22;9.6E-22;1.0E-21;1.1E-21;1.4E-21;1.5E-21	MULTISPECIES: alpha/beta hydrolase [unclassified Francisella]	2.9e-31	264	222	32	253	55.86
MGYP000358148447	AcvB/VirJ family lysyl-phosphatidylglycerol hydrolase	496	2.1E-116;8.9E-112;3.0E-111;1.1E-98;2.4E-97;1.7E-94;2.4E-94;1.7E-93;6.4E-93;1.1E-92;3.3E-92;2.1E-91;4.7E-90;9.4E-90;1.4E-89;2.3E-88;3.0E-88;4.1E-88;1.1E-87;3.2E-87	AcvB/VirJ family lysyl-phosphatidylglycerol hydrolase [Geopsychrobacter electrodiphilus]	2.1e-116	476	450	50	494	59.56
MGYP000358182141	alpha/beta fold hydrolase	309	2.6E-34;1.4E-28;1.9E-28;3.5E-28;5.2E-28;7.2E-28;1.0E-27;1.0E-27;1.4E-27;2.5E-27;2.8E-26;2.8E-26;2.9E-26;5.1E-26;1.4E-25;1.5E-25;2.8E-25;3.9E-25;1.0E-24;1.0E-24	alpha/beta fold hydrolase [Usitatibacter palustris]	2.6e-34	309	263	44	295	53.61
MGYP000358185234	alpha/beta hydrolase	282	2.9E-74;3.4E-57;2.7E-56;5.4E-56;9.2E-56;9.2E-56;2.3E-55;1.0E-54;4.1E-54;2.6E-50;5.1E-50;8.0E-48;1.1E-47;2.2E-47;2.6E-47;7.2E-47;1.2E-46;2.1E-46;2.8E-46;3.9E-46	alpha/beta hydrolase [Phototrophicus methaneseepsis]	2.9e-74	284	281	2	277	62.99
MGYP000358423426	alpha/beta hydrolase	240	6.4E-137;6.1E-135;2.3E-130;5.1E-127;7.2E-127;8.4E-126;1.7E-125;4.0E-124;1.3E-122;1.1E-121;2.9E-119;5.9E-119;3.4E-118;2.0E-117;5.6E-117;2.3E-116;4.4E-114;2.0E-101;3.2E-100;3.2E-100	alpha/beta hydrolase [Reyranella sp.]	6.4e-137	262	205	1	205	97.56
MGYP000358905673	hypothetical protein	248	1.2E-97;2.0E-94;2.7E-94;1.2E-80;8.7E-79;1.2E-78;4.8E-78;4.8E-78;1.0E-77;1.9E-77;5.4E-77;6.5E-77;2.2E-76;2.2E-76;3.1E-76;1.1E-75;1.1E-75;2.2E-75;2.3E-75;2.5E-75	hypothetical protein [Microlunatus capsulatus]	1.2e-97	245	231	12	242	76.62
MGYP000361846747	alpha/beta fold hydrolase	312	7.0E-75;1.0E-74;7.0E-74;1.6E-73;8.3E-73;1.9E-72;5.1E-72;8.1E-71;1.2E-70;2.3E-70;4.9E-70;8.9E-70;1.6E-67;1.9E-67;5.2E-67;1.4E-66;4.0E-66;2.7E-65;5.4E-65;2.1E-64	alpha/beta fold hydrolase [Streptomyces sp. NRRL B-24572]	7e-75	328	287	36	311	60.28
MGYP000364081337	alpha/beta fold hydrolase	446	8.1E-188;2.8E-185;3.5E-184;2.3E-182;3.3E-176;5.3E-175;3.8E-174;1.7E-173;3.0E-173;4.6E-173;5.7E-173;1.2E-172;1.7E-172;9.0E-172;1.5E-171;2.1E-171;8.1E-171;3.2E-170;9.6E-170;5.2E-169	alpha/beta fold hydrolase [Reyranella sp. CPCC 100927]	8.1e-188	445	428	21	445	73.83
MGYP000364155979	hypothetical protein	360	4.2E-64;2.2E-51;1.0E-49;1.4E-45;9.2E-41;5.8E-40;9.3E-40;5.7E-37;7.6E-36;2.9E-34;5.0E-32;6.1E-32;2.2E-31;3.0E-31;3.2E-31;4.8E-31;9.2E-31;5.1E-30;9.7E-30;1.1E-29	hypothetical protein [Rhodoferax sp.]	4.2e-64	368	242	47	286	64.05
MGYP000364172706	3-oxoadipate enol-lactonase	255	5.3E-80;7.5E-80;1.8E-79;2.6E-79;5.0E-79;4.2E-78;8.4E-78;9.9E-78;1.4E-76;2.3E-76;9.1E-76;1.3E-75;1.3E-75;1.3E-75;1.8E-75;3.6E-75;5.3E-75;5.3E-75;7.2E-75;7.4E-75	3-oxoadipate enol-lactonase [Micromonospora andamanensis]	5.3e-80	260	242	11	251	69.42
MGYP000364261476	alpha/beta hydrolase	262	5.9E-189;1.2E-188;4.8E-188;1.7E-181;2.8E-162;6.8E-161;1.3E-160;1.3E-158;7.6E-158;1.5E-157;9.7E-149;1.9E-137;7.2E-133;1.9E-128;5.5E-128;7.6E-128;7.8E-128;7.8E-128;1.5E-127;1.5E-127	alpha/beta hydrolase [Acidovorax temperans]	5.9e-189	262	262	1	262	99.24
MGYP000364759879	alpha/beta fold hydrolase	309	2.4E-50;1.6E-49;2.6E-48;5.2E-48;5.2E-48;3.5E-47;4.1E-47;8.1E-47;8.5E-47;1.1E-46;3.3E-46;3.3E-46;4.0E-46;4.3E-46;4.7E-46;5.2E-46;5.4E-46;9.1E-46;9.3E-46;1.0E-45	alpha/beta fold hydrolase [Alkalimarinus coralli]	2.4e-50	329	268	47	305	58.58
MGYP000364889847	alpha/beta fold hydrolase	204	1.7E-93;1.9E-58;1.8E-57;1.3E-54;3.3E-54;1.1E-49;2.0E-48;4.9E-48;5.6E-47;1.1E-46;3.1E-46;6.0E-46;1.6E-45;2.0E-44;5.1E-44;3.8E-41;5.6E-36;7.9E-28;3.0E-21;4.2E-21	alpha/beta fold hydrolase [Halorutilus salinus]	1.7e-93	205	204	1	204	79.9
MGYP000364908578	phospholipase A1-Igamma3, chloroplastic-like isoform X2	254	1.0E-51;4.8E-51;2.0E-50;4.7E-49;5.7E-49;5.7E-49;6.5E-49;7.9E-49;2.3E-48;3.0E-48;3.0E-48;3.3E-48;3.4E-48;3.4E-48;4.1E-48;4.4E-48;6.8E-48;8.6E-48;8.6E-48;1.8E-47	phospholipase A1-Igamma3, chloroplastic-like isoform X2 [Salvia splendens]	1e-51	471	245	10	254	62.04
MGYP000365342716	alpha/beta hydrolase	284	9.2E-58;5.1E-57;1.5E-53;2.1E-53;2.8E-53;5.9E-53;1.9E-52;2.1E-51;3.6E-51;1.6E-50;2.4E-50;2.9E-50;8.6E-50;4.6E-49;4.7E-49;1.2E-48;1.8E-48;2.6E-48;3.2E-48;3.6E-48	alpha/beta hydrolase [Emticicia sp. CRIBPO]	9.2e-58	276	257	21	276	59.92
MGYP000366999613	alpha/beta hydrolase	265	1.5E-195;5.1E-97;4.4E-92;3.1E-82;1.2E-76;8.1E-69;9.2E-68;5.3E-67;6.0E-66;2.7E-64;3.3E-64;4.3E-63;5.0E-63;6.4E-63;6.8E-63;8.3E-63;8.8E-63;1.3E-62;7.3E-62;2.1E-61	alpha/beta hydrolase [Candidatus Promineifilum breve]	1.5e-195	265	265	1	265	100
MGYP000367250060	alpha/beta fold hydrolase	290	9.0E-97;4.9E-54;4.2E-52;6.6E-51;2.4E-50;4.8E-50;4.8E-50;6.6E-50;6.8E-50;1.4E-49;1.9E-49;1.9E-49;3.6E-48;2.9E-47;1.1E-45;2.4E-37;2.4E-36;3.6E-36;5.3E-36;9.6E-36	alpha/beta fold hydrolase [Haliangium ochraceum]	9e-97	342	237	52	288	75.95
MGYP000367252233	triacylglycerol lipase	328	2.2E-112;1.2E-107;1.8E-106;3.1E-104;1.8E-103;1.8E-103;2.5E-103;3.3E-103;1.1E-102;2.5E-102;3.3E-102;1.4E-101;2.8E-101;4.0E-101;4.2E-101;5.0E-101;5.5E-101;5.7E-101;7.5E-101;8.0E-101	triacylglycerol lipase [Fluviicoccus keumensis]	2.2e-112	330	313	14	326	72.2
MGYP000367327027	alpha/beta fold hydrolase	231	9.6E-102;2.9E-88;2.7E-86;9.5E-85;2.1E-83;2.1E-83;6.2E-80;1.7E-77;6.9E-77;1.4E-76;1.1E-75;3.6E-74;5.7E-74;1.4E-73;1.5E-73;1.6E-73;2.1E-72;2.8E-72;3.3E-72;3.7E-72	alpha/beta fold hydrolase [Lewinella cohaerens]	9.6e-102	233	227	2	228	83.7
MGYP000368517602	triacylglycerol lipase	197	1.4E-139;2.2E-78;3.1E-78;8.9E-78;1.8E-77;1.2E-76;2.9E-76;3.7E-76;1.0E-75;1.1E-75;1.4E-75;1.5E-75;3.0E-75;4.3E-75;8.6E-75;8.6E-75;1.2E-74;1.2E-74;1.3E-74;2.5E-74	triacylglycerol lipase [Leptolyngbya sp. CCY15150]	1.4e-139	197	197	1	197	98.48
MGYP000368554723	triacylglycerol lipase	215	3.5E-28;3.7E-28;4.1E-28;1.9E-27;7.6E-27;7.8E-27;1.1E-26;1.1E-26;1.6E-26;3.0E-26;3.3E-26;3.5E-26;4.2E-26;4.6E-26;9.7E-26;1.1E-25;1.1E-25;1.1E-25;1.2E-25;1.2E-25	triacylglycerol lipase [Streptomyces sp. ISL-100]	3.5e-28	227	207	5	209	51.69
MGYP000370377586	alpha/beta fold hydrolase	210	1.1E-59;3.6E-58;2.9E-55;4.0E-55;1.1E-54;1.1E-54;2.6E-53;2.1E-52;2.3E-51;1.0E-49;1.4E-49;2.9E-49;4.1E-49;4.1E-49;5.8E-42;5.9E-35;2.5E-25;2.6E-25;2.6E-25;1.5E-24	alpha/beta fold hydrolase [Anaeroplasma sp.]	1.1e-59	320	224	2	210	59.82
MGYP000370991683	alpha/beta hydrolase	329	1.7E-114;2.2E-112;3.1E-112;6.3E-112;1.3E-111;3.6E-111;5.1E-111;5.1E-111;7.3E-111;2.7E-110;2.6E-106;1.2E-104;1.7E-104;9.9E-104;1.4E-103;2.0E-103;2.0E-103;2.2E-103;4.6E-102;4.6E-102	alpha/beta hydrolase [Candidatus Pelagibacter ubique]	1.7e-114	258	225	105	329	83.11
MGYP000371183886	alpha/beta fold hydrolase	254	3.3E-127;6.3E-125;3.6E-124;3.6E-124;3.9E-122;1.8E-119;1.1E-118;1.6E-118;1.7E-118;2.9E-118;9.3E-118;9.3E-118;2.7E-117;2.7E-117;2.8E-117;3.5E-117;4.5E-117;5.5E-117;7.6E-117;1.1E-116	alpha/beta fold hydrolase [Thalassomonas viridans]	3.3e-127	254	252	1	252	84.13
MGYP000371227376	alpha/beta hydrolase	318	5.5E-116;1.2E-115;3.1E-115;2.6E-114;2.6E-114;3.6E-114;1.3E-113;1.5E-113;2.8E-113;3.3E-113;8.1E-113;1.2E-112;2.4E-112;3.3E-112;4.7E-112;4.7E-112;4.7E-112;6.6E-112;6.8E-112;7.6E-112	alpha/beta hydrolase [Mesorhizobium metallidurans]	5.5e-116	313	306	13	318	69.61
MGYP000371387716	alpha/beta fold hydrolase	252	4.0E-118;3.8E-116;1.5E-115;4.4E-115;2.9E-113;1.2E-112;1.1E-109;2.3E-109;3.8E-108;1.8E-106;4.1E-105;1.2E-104;6.2E-102;2.5E-99;4.3E-94;1.3E-90;1.0E-88;3.7E-88;2.4E-87;6.4E-87	alpha/beta fold hydrolase [Chryseosolibacter histidini]	4e-118	253	252	1	252	81.75
MGYP000371497433	MULTISPECIES: lipase family protein	295	2.6E-47;9.5E-45;2.7E-44;2.4E-43;2.9E-43;7.4E-42;2.1E-39;7.1E-39;1.9E-38;5.6E-38;8.9E-38;1.2E-37;1.2E-37;1.3E-37;2.0E-37;2.8E-37;2.8E-37;3.1E-37;3.2E-37;4.0E-37	MULTISPECIES: lipase family protein [unclassified Ketobacter]	2.6e-47	285	284	4	287	52.11
MGYP000372999571	lipase family protein	216	1.6E-88;8.8E-87;1.0E-83;3.7E-79;5.2E-74;4.3E-51	lipase family protein [Bradyrhizobium japonicum]	1.6e-88	218	211	1	209	74.41
MGYP000373003896	AMP-binding protein	224	5.5E-42;7.2E-27;2.4E-25;3.6E-25;3.7E-25;3.7E-25;5.9E-25;7.5E-25;7.5E-25;9.1E-25;1.0E-24;1.0E-24;1.0E-24;1.0E-24;1.4E-24;1.7E-24;1.7E-24;1.7E-24;1.7E-24;1.9E-24	AMP-binding protein [uncultured Paludibaculum sp.]	5.5e-42	1519	239	12	213	54.81
MGYP000373213235	alpha/beta fold hydrolase	204	2.9E-143;2.1E-72;2.0E-39;2.1E-39;8.0E-34;2.4E-33;6.0E-33;6.9E-33;4.4E-32;7.5E-31;2.2E-29;2.8E-25;2.8E-25;3.9E-25;7.7E-23;4.3E-22;5.7E-22;6.6E-22;1.9E-21;3.2E-21	alpha/beta fold hydrolase [Nitratidesulfovibrio sp. 1201_IL3209]	2.9e-143	306	204	1	204	98.04
MGYP000373754888	uncharacterized protein LOC112285089	179	1.0E-39;2.3E-39	uncharacterized protein LOC112285089 [Physcomitrium patens]	1e-39	507	150	7	155	68
MGYP000374019758	alpha/beta hydrolase	268	6.9E-191;1.4E-190;4.0E-190;2.3E-189;6.6E-189;1.2E-182;5.3E-174;1.8E-156;6.8E-152;1.4E-147;2.0E-147;2.3E-146;1.9E-145;2.3E-139;2.6E-138;3.7E-138;3.4E-134;1.8E-124;5.3E-124;5.3E-124	alpha/beta hydrolase [Pseudalkalibacillus sedimenti]	6.9e-191	268	268	1	268	99.25
MGYP000374024816	alpha/beta fold hydrolase	281	9.3E-64;5.3E-60;4.3E-58;2.0E-53;4.4E-52;4.9E-51;3.5E-49;5.0E-49;5.0E-49;1.4E-48;1.1E-47;3.2E-47;4.0E-47;5.5E-47;5.5E-47;8.7E-47;2.2E-46;2.2E-46;2.2E-46;2.6E-46	alpha/beta fold hydrolase [Zeimonas sediminis]	9.3e-64	304	238	36	273	60.92
MGYP000376593442	hypothetical protein	294	6.7E-129;8.6E-124;1.6E-120;1.3E-119;2.0E-119;2.7E-119;3.8E-119;3.8E-119;3.8E-119;3.3E-118;6.3E-118;1.8E-117;1.8E-117;5.3E-117;6.5E-116;9.8E-116;6.8E-115;1.0E-113;2.0E-111;3.7E-111	hypothetical protein [Conexibacter sp. DBS9H8]	6.7e-129	339	293	2	294	74.4
MGYP000376652385	alpha/beta fold hydrolase	212	1.9E-33;1.9E-33;4.1E-33;4.8E-33;8.3E-33;9.5E-33;1.2E-32;1.5E-32;1.5E-32;1.8E-32;1.9E-32;2.1E-32;3.1E-32;4.1E-32;4.2E-32;6.2E-32;8.1E-32;1.0E-31;1.1E-31;1.2E-31	alpha/beta fold hydrolase [Actinacidiphila oryziradicis]	1.9e-33	226	204	16	210	57.35
MGYP000376688871	alpha/beta fold hydrolase	307	5.7E-191;4.0E-180;2.2E-177;2.4E-174;6.0E-173;1.1E-172;4.3E-168;2.0E-166;8.8E-163;7.2E-162;3.9E-157;1.4E-150;2.6E-146;2.4E-144;1.3E-139;5.3E-139;2.8E-138;3.1E-138;3.9E-138;6.2E-138	alpha/beta fold hydrolase [Brevundimonas sp.]	5.7e-191	306	307	1	307	94.46
MGYP000378717193	uncharacterized protein CAALFM_C104190CA	392	9.8E-278;5.2E-224;1.1E-178;3.7E-66;1.1E-58;7.7E-57;1.2E-55;1.3E-55;4.7E-55;6.6E-55;6.8E-55;1.0E-54;1.2E-54;3.4E-54;1.0E-53;1.0E-53;1.8E-53;3.0E-53;5.0E-53;6.6E-53	uncharacterized protein CAALFM_C104190CA [Candida albicans SC5314]	9.8e-278	390	390	3	392	98.46
MGYP000378909905	hypothetical protein	239	3.9E-65;1.5E-35;1.1E-32;9.1E-32;5.2E-24;2.0E-23;1.3E-21;3.4E-19;1.4E-18;7.1E-18	hypothetical protein [Humisphaera borealis]	3.9e-65	282	215	3	216	67.44
MGYP000379073270	MULTISPECIES: hypothetical protein	193	9.2E-47;4.2E-42;2.8E-41;4.5E-41;9.7E-41;9.7E-41;9.7E-41;9.7E-41;2.9E-39;2.9E-39;1.5E-38;2.5E-35;9.7E-34;3.4E-33;2.2E-32;6.1E-26;6.1E-26;7.1E-24;1.2E-21;4.2E-21	MULTISPECIES: hypothetical protein [unclassified Rickettsia]	9.2e-47	317	188	1	187	60.64
MGYP000380320456	lipase family protein	201	1.7E-114;1.9E-90;2.7E-90;9.2E-86;1.5E-84;8.4E-81;8.4E-81;1.1E-80;1.3E-79;3.7E-79;1.9E-76;1.7E-75;8.7E-75;1.1E-74;1.3E-74;8.3E-74;1.6E-73;3.2E-73;6.4E-73;9.1E-73	lipase family protein [Aliikangiella sp. G2MR2-5]	1.7e-114	394	200	1	200	88
MGYP000381981903	hypothetical protein	243	8.7E-59;1.0E-53;1.0E-53;2.1E-53;1.3E-51	hypothetical protein [Parachlamydia sp. AcF125]	8.7e-59	290	229	15	237	64.63
MGYP000382347249	predicted protein	173	4.9e-50	predicted protein [Phaeodactylum tricornutum CCAP 1055/1]	4.9e-50	405	173	1	173	68.79
MGYP000383261236	alpha/beta fold hydrolase	268	1.0E-101;1.3E-100;3.1E-68;5.3E-67;2.0E-66;5.9E-66;8.4E-66;9.5E-66;1.7E-65;4.6E-65;5.5E-65;5.9E-65;9.8E-65;1.0E-64;1.2E-64;1.7E-64;2.0E-64;2.3E-64;3.4E-64;4.0E-64	alpha/beta fold hydrolase [Arenicella chitinivorans]	1e-101	265	266	1	266	72.56
MGYP000383355466	alpha/beta hydrolase	269	3.2E-189;7.2E-186;1.0E-185;2.1E-185;1.2E-184;1.7E-184;4.9E-184;6.9E-184;1.8E-183;2.3E-183;5.6E-183;8.0E-183;1.1E-182;4.0E-182;2.1E-180;2.9E-180;9.5E-179;2.0E-178;2.6E-178;1.9E-177	alpha/beta hydrolase [Amycolatopsis rhizosphaerae]	3.2e-189	314	265	3	267	97.74
MGYP000384636603	alpha/beta fold hydrolase	215	1.8E-37;2.8E-36;1.3E-35;3.1E-35;4.4E-35;3.4E-33;3.1E-30;3.1E-28;9.0E-27;7.5E-26;1.3E-25;3.0E-25;2.1E-24;4.5E-24;8.6E-24;8.9E-24;1.3E-23;2.4E-23;3.1E-23;4.4E-23	alpha/beta fold hydrolase [uncultured Victivallis sp.]	1.8e-37	223	196	21	213	55.61
MGYP000384790206	lipase family protein	158	1.3E-38;6.7E-37;1.1E-36;6.3E-36;1.1E-35;1.1E-35;1.1E-35;1.1E-34;1.1E-34;1.2E-34;1.5E-34;1.7E-34;2.4E-34;2.4E-34;4.4E-34;1.9E-33;3.4E-33;3.4E-33;3.5E-33;4.5E-33	lipase family protein [Mycobacterium sp. 94-17]	1.3e-38	292	151	2	151	65.56
MGYP000384807020	alpha/beta hydrolase	284	6.8E-97;4.9E-94;1.1E-93;1.5E-93;2.3E-93;4.7E-93;2.4E-92;1.1E-91;2.0E-91;2.9E-91;2.9E-91;4.1E-91;7.0E-91;6.0E-90;6.6E-90;7.6E-90;9.1E-90;1.4E-89;1.5E-89;2.6E-89	alpha/beta hydrolase [Actinomadura physcomitrii]	6.8e-97	287	286	1	284	68.18
MGYP000386203698	Mbeg1-like protein	262	1.8E-190;4.2E-189;1.7E-188;1.7E-188;1.1E-187;1.4E-180;5.5E-169;1.6E-168;3.4E-158;6.3E-154;2.6E-151;2.6E-151;2.6E-151;4.3E-150;1.7E-147;6.8E-147;2.0E-146;6.5E-145;6.5E-145;8.0E-145	Mbeg1-like protein [Shewanella ulleungensis]	1.8e-190	262	262	1	262	96.95
MGYP000388887180	alpha/beta hydrolase	265	2.3E-63;6.2E-56;5.0E-55;3.7E-53;1.5E-43;2.1E-43;1.8E-41;5.1E-41;7.2E-41;1.0E-40;1.2E-40;2.0E-40;2.0E-40;2.8E-40;7.9E-40;7.9E-40;1.1E-39;1.6E-39;2.4E-39;1.8E-38	alpha/beta hydrolase [Salaquimonas pukyongi]	2.3e-63	271	265	1	264	58.87
MGYP000389164943	alpha/beta hydrolase	295	6.5E-150;1.8E-146;5.3E-146;3.3E-145;2.1E-143;4.0E-142;2.1E-134;2.6E-133;2.6E-133;3.4E-133;6.9E-133;7.4E-133;1.1E-132;1.5E-132;4.2E-132;5.6E-132;5.8E-132;1.2E-131;1.6E-131;1.6E-131	alpha/beta hydrolase [Tenacibaculum soleae]	6.5e-150	296	295	1	295	84.75
MGYP000390781450	MULTISPECIES: alpha/beta fold hydrolase	287	5.9E-206;7.2E-120;5.8E-115;2.7E-65;7.1E-61;8.4E-58;4.4E-56;5.0E-55;6.6E-54;2.6E-53;3.1E-50;4.5E-50;6.4E-50;1.1E-49;1.7E-49;3.0E-49;7.1E-49;7.5E-49;1.3E-48;1.6E-46	MULTISPECIES: alpha/beta fold hydrolase [unclassified Gordonia (in: high G+C Gram-positive bacteria)]	5.9e-206	287	287	1	287	100
MGYP000390834468	alpha/beta hydrolase	261	2.2E-45;3.9E-37;3.3E-35;1.8E-34	alpha/beta hydrolase [Pseudobacteriovorax antillogorgiicola]	2.2e-45	260	260	1	260	55.38
MGYP000391075857	triacylglycerol lipase	206	5.8E-79;1.3E-77;1.8E-77;1.8E-77;1.8E-77;1.8E-77;1.8E-77;1.8E-77;1.8E-77;1.8E-77;1.8E-77;1.8E-77;1.8E-77;1.8E-77;5.2E-77;7.3E-77;7.3E-77;1.5E-76;1.5E-76;1.2E-61	triacylglycerol lipase [uncultured Ruminococcus sp.]	5.8e-79	447	158	3	156	86.08
MGYP000393873907	alpha/beta hydrolase	258	1.4E-114;1.5E-114;2.1E-114;2.7E-114;3.0E-114;3.9E-114;4.2E-114;4.2E-114;5.5E-114;5.8E-114;6.0E-114;7.9E-114;8.5E-114;1.1E-113;1.1E-113;1.2E-113;1.6E-113;1.7E-113;1.7E-113;1.7E-113	alpha/beta hydrolase [Spongiivirga citrea]	1.4e-114	259	260	1	257	81.54
MGYP000394364599	MULTISPECIES: alpha/beta hydrolase	164	1.3E-28;5.0E-28;3.3E-27;8.1E-25;1.1E-24;1.1E-24;5.8E-17;8.1E-17;8.1E-17;8.8E-17;1.0E-16;1.0E-16;1.4E-16;1.4E-16;1.4E-16;1.4E-16;1.4E-16;1.4E-16;1.4E-16;1.5E-16	MULTISPECIES: alpha/beta hydrolase [unclassified Neochlamydia]	1.3e-28	338	162	1	159	61.73
MGYP000394419595	hypothetical protein	222	2.9E-134;4.1E-134;2.6E-129;1.1E-65;8.2E-65;1.1E-64;3.0E-64;6.2E-64;1.7E-63;1.1E-62;1.2E-62;3.6E-62;8.7E-62;1.7E-61;2.5E-61;3.5E-61;4.8E-61;5.1E-61;5.2E-61;5.9E-61	hypothetical protein [Desulfuromonas acetoxidans]	2.9e-134	409	222	1	222	89.19
MGYP000394650383	3-oxoadipate enol-lactonase	268	1.9E-78;1.5E-76;1.9E-76;4.2E-75;6.3E-75;9.2E-75;1.4E-73;2.1E-73;4.4E-73;5.8E-73;1.2E-72;2.3E-72;3.3E-72;4.7E-72;4.7E-72;5.5E-72;9.4E-72;9.4E-72;1.3E-71;1.4E-71	3-oxoadipate enol-lactonase [Acidihalobacter prosperus]	1.9e-78	259	210	1	209	70.48
MGYP000395361892	alpha/beta hydrolase	302	1.4E-214;2.7E-214;2.7E-214;3.9E-214;5.5E-214;1.1E-213;3.2E-213;9.2E-213;2.0E-148;2.1E-89;2.1E-89;3.0E-89;6.0E-89;6.0E-89;8.5E-89;1.2E-88;2.4E-88;2.5E-88;2.5E-88;6.9E-88	alpha/beta hydrolase [Sneathia sanguinegens]	1.4e-214	302	302	1	302	99.67
MGYP000398015430	alpha/beta fold hydrolase	301	7.1E-114;1.7E-99;6.4E-91;2.5E-87;4.4E-87;5.8E-87;2.2E-83;2.9E-81;2.3E-80;1.1E-77;7.6E-76;4.5E-71;1.7E-61;1.7E-60;2.9E-50;1.3E-48;1.7E-43;4.1E-41;4.2E-41;3.9E-40	alpha/beta fold hydrolase [Rubritalea squalenifaciens]	7.1e-114	300	279	14	292	72.76
MGYP000400172449	alpha/beta fold hydrolase	296	1.5E-53;6.4E-52;1.6E-50;1.6E-49;7.9E-41;1.7E-20	alpha/beta fold hydrolase [Candidatus Nitrosocosmicus oleophilus]	1.5e-53	264	276	23	295	55.43
MGYP000400180232	hypothetical protein	214	1.6E-71;1.5E-68;5.0E-66;6.1E-61;1.2E-57;1.3E-54;2.6E-54;7.3E-54;1.4E-53;2.9E-53;5.6E-53;1.1E-52;1.6E-52;1.6E-52;4.4E-52;4.4E-52;4.4E-52;1.8E-51;3.1E-51;3.4E-51	hypothetical protein [Povalibacter uvarum]	1.6e-71	431	228	1	212	69.74
MGYP000400257489	uncharacterized protein LOC131057374 isoform X1	193	3.6E-21;6.7E-21;8.8E-21;8.8E-21;9.0E-21;9.1E-21;9.1E-21;9.1E-21;9.1E-21;9.2E-21;9.2E-21;9.2E-21;9.2E-21;9.2E-21;9.2E-21;1.2E-20;1.2E-20;1.2E-20;1.2E-20;1.2E-20	uncharacterized protein LOC131057374 isoform X1 [Cryptomeria japonica]	3.6e-21	826	121	36	143	63.64
MGYP000400320455	homoserine O-acetyltransferase	373	6.1E-163;8.6E-163;1.0E-161;1.5E-158;4.5E-158;1.8E-154;2.4E-154;4.7E-154;6.5E-154;9.2E-154;1.3E-153;1.8E-153;7.0E-151;7.6E-151;1.2E-150;2.7E-149;7.5E-149;1.0E-148;1.1E-148;1.5E-147	homoserine O-acetyltransferase [Spirochaeta thermophila]	6.1e-163	392	367	4	366	78.47
MGYP000400943148	alpha/beta hydrolase	264	4.0E-114;2.1E-68;6.7E-67;7.4E-65;2.6E-64;2.6E-64;5.8E-64;5.8E-64;1.6E-63;1.3E-62;2.6E-62;3.7E-62;3.8E-61;4.0E-61;7.5E-61;1.1E-60;5.7E-60;6.0E-60;1.3E-59;3.4E-59	alpha/beta hydrolase [Mariniplasma anaerobium]	4e-114	263	197	1	197	89.34
MGYP000400976478	alpha/beta hydrolase	248	1.4E-155;2.3E-87;2.0E-81;7.0E-81;1.9E-80;3.2E-80;1.1E-79;2.9E-79;2.9E-79;4.5E-78;1.3E-77;1.0E-76;1.6E-76;2.1E-76;3.2E-76;1.1E-75;3.7E-74;1.1E-73;1.1E-69;5.3E-60	alpha/beta hydrolase [Desulfovirgula thermocuniculi]	1.4e-155	278	248	1	248	93.95
MGYP000403199471	alpha/beta hydrolase	272	2.1E-125;5.7E-117;2.0E-115;1.5E-107;2.4E-103;5.1E-48;7.6E-43;1.1E-42;1.6E-41;1.7E-41;9.3E-41;9.3E-41;1.3E-40;4.0E-40;1.4E-39;1.6E-39;3.1E-39;3.7E-39;4.6E-39;5.0E-39	alpha/beta hydrolase [Anaerobacterium chartisolvens]	2.1e-125	283	261	1	261	79.69
MGYP000403218155	alpha/beta hydrolase	258	4.7E-175;3.8E-120;1.2E-119;1.7E-119;1.7E-119;9.3E-119;1.3E-116;5.4E-116;1.1E-115;1.3E-115;3.7E-115;5.8E-115;8.5E-115;1.1E-113;1.9E-113;2.8E-113;1.1E-112;2.1E-112;2.1E-112;4.8E-112	alpha/beta hydrolase [Halobellus litoreus]	4.7e-175	297	258	1	258	97.67
MGYP000403810683	alpha/beta hydrolase	262	2.5E-46;3.6E-30;1.9E-24;1.4E-23;3.3E-23;5.3E-23;7.4E-23;9.7E-23;1.0E-22;1.1E-22;1.4E-22;2.2E-22;2.4E-22;2.4E-22;3.6E-22;4.9E-22;8.4E-22;1.8E-21;1.8E-21;2.2E-21	alpha/beta hydrolase [Variovorax sp. RO1]	2.5e-46	267	269	1	260	55.02
MGYP000408353155	lipase family protein	203	3.9E-55;1.6E-53;5.3E-53;1.0E-52;1.5E-52;3.3E-51;7.0E-51;1.6E-50;2.7E-50;7.4E-50;1.5E-49;2.9E-49;3.1E-49;5.1E-49;8.9E-49;8.9E-49;4.2E-48;4.6E-48;4.7E-48;4.7E-48	lipase family protein [Accumulibacter sp.]	3.9e-55	282	183	14	195	67.21
MGYP000409096632	alpha/beta hydrolase	265	1.2E-143;2.7E-140;1.3E-138;3.4E-112;2.5E-96;6.6E-94;7.2E-93;9.7E-91;2.1E-90;1.7E-89;1.7E-89;2.4E-89;4.0E-89;6.7E-89;6.7E-89;7.8E-89;1.4E-88;3.9E-88;3.9E-88;5.0E-88	alpha/beta hydrolase [Leptolyngbya sp. NIES-2104]	1.2e-143	261	260	1	260	88.46
MGYP000409306896	hydrolase	211	1.0E-148;5.5E-146;4.5E-133;5.0E-114;4.1E-113;1.7E-112;6.1E-111;7.8E-88;1.8E-86;1.8E-86;2.6E-86;5.2E-86;5.2E-86;1.0E-85;1.6E-85;2.1E-85;1.3E-84;1.7E-84;2.5E-84;2.7E-84	hydrolase [uncultured Acinetobacter sp.]	1e-148	212	209	1	209	97.13
MGYP000409526609	alpha/beta fold hydrolase	275	1.8E-39;2.0E-38;2.5E-38;3.1E-38;3.2E-38;1.0E-37;1.4E-37;3.7E-37;6.0E-37;7.6E-37;7.8E-37;8.0E-37;1.1E-36;1.4E-36;2.2E-36;6.3E-36;7.7E-36;8.9E-36;9.7E-36;1.2E-35	alpha/beta fold hydrolase [Deinococcus sp. Arct2-2]	1.8e-39	292	271	6	272	54.98
MGYP000411569274	alpha/beta fold hydrolase	360	2.8E-142;2.0E-133;5.2E-130;4.1E-128;3.2E-126;5.6E-126;1.2E-123;2.1E-123;1.1E-122;2.7E-119;3.8E-119;1.8E-116;2.0E-116;5.6E-116;3.0E-115;1.5E-114;2.0E-114;4.8E-114;4.9E-114;1.7E-113	alpha/beta fold hydrolase [Sinimarinibacterium flocculans]	2.8e-142	337	319	38	355	78.06
MGYP000412740280	lipase family protein	222	4.1E-34;9.0E-28	lipase family protein [Pseudomaricurvus alkylphenolicus]	4.1e-34	208	176	20	191	63.07
MGYP000412768217	alpha/beta fold hydrolase	283	1.7E-101;3.2E-101;5.8E-92;2.9E-91;1.5E-89;5.4E-89;7.0E-89;1.0E-88;1.0E-88;2.4E-88;5.1E-88;7.1E-88;1.8E-87;2.7E-86;7.7E-86;8.2E-86;8.5E-86;6.9E-85;1.0E-84;1.3E-84	alpha/beta fold hydrolase [Polaribacter haliotis]	1.7e-101	284	268	16	283	71.27
MGYP000415417754	alpha/beta hydrolase	246	5.6E-53;1.8E-40;7.7E-40;3.2E-39;7.8E-38;7.5E-37;3.2E-35;5.0E-35;1.9E-34;5.3E-34;3.4E-33;4.8E-33;6.3E-33;1.1E-32;1.7E-32;1.7E-32;2.5E-31;2.5E-31;3.3E-31;5.3E-31	alpha/beta hydrolase [Anaeromonas frigoriresistens]	5.6e-53	258	242	7	246	60.33
MGYP000415505401	alpha/beta fold hydrolase	178	4.1E-123;7.1E-110;1.4E-109;1.4E-109;5.8E-109;5.8E-109;8.3E-109;4.8E-108;3.7E-105;1.1E-96;3.4E-94;6.3E-91;9.6E-75;2.9E-71;1.4E-37;1.2E-33;4.2E-32;1.0E-31;4.2E-31;1.7E-30	alpha/beta fold hydrolase [Limnobacter sp. 130]	4.1e-123	290	178	1	178	100
MGYP000415717251	alpha/beta fold hydrolase	258	1.4E-67;2.2E-65;2.2E-65;4.6E-65;7.7E-65;1.7E-64;2.5E-64;3.5E-64;4.9E-64;2.0E-63;2.0E-63;3.9E-63;5.5E-63;1.1E-62;5.5E-62;9.1E-62;3.8E-60;2.1E-59;2.3E-59;4.0E-59	alpha/beta fold hydrolase [Prauserella muralis]	1.4e-67	325	203	56	258	71.43
MGYP000415730242	MULTISPECIES: alpha/beta hydrolase	257	8.4E-191;4.9E-190;4.9E-190;9.8E-190;1.4E-189;1.4E-189;2.8E-189;2.8E-189;2.8E-189;4.0E-189;4.0E-189;6.6E-188;1.3E-187;1.9E-187;3.8E-187;3.8E-187;5.4E-187;5.4E-187;6.3E-187;7.8E-187	MULTISPECIES: alpha/beta hydrolase [Bacillus cereus group]	8.4e-191	257	257	1	257	100
MGYP000415973859	alpha/beta hydrolase	520	0.0E0;1.6E-185;1.4E-177;1.4E-177;1.8E-177;2.8E-177;2.8E-177;2.8E-177;1.1E-176;1.8E-175;1.0E-174;8.9E-171;3.6E-170;1.8E-166;3.5E-166;2.2E-154;1.1E-126;5.4E-126;9.0E-126;2.5E-124	alpha/beta hydrolase [Stomatobaculum sp. F0698]	0	512	512	9	520	99.61
MGYP000417334846	alpha/beta fold hydrolase	301	1.8e-23	alpha/beta fold hydrolase [Candidatus Protochlamydia phocaeensis]	1.8e-23	317	253	61	287	50.59
MGYP000417472197	hypothetical protein DDB_G0278621	277	4.8E-27;4.8E-22;2.0E-18;3.6E-17;5.7E-16	hypothetical protein DDB_G0278621 [Dictyostelium discoideum AX4]	4.8e-27	856	259	7	258	50.19
MGYP000417925338	alpha/beta hydrolase	228	1.5E-58;1.2E-57;1.7E-57;1.1E-54;8.8E-54;5.3E-52;5.3E-52;1.5E-51;4.4E-51;6.3E-50;1.0E-49;8.1E-49;1.2E-48;2.0E-48;2.2E-48;5.5E-48;6.5E-48;1.3E-47;2.3E-47;8.9E-47	alpha/beta hydrolase [Zhongshania aliphaticivorans]	1.5e-58	291	169	1	169	71.01
MGYP000420094354	hypothetical protein	409	1.4E-208;3.5E-207;3.2E-146;2.0E-144;8.9E-140;1.1E-137;7.3E-136;9.6E-134;3.2E-124;1.7E-119;1.3E-117;9.3E-117;4.0E-105;5.6E-105;1.8E-104;8.1E-103;1.1E-102;1.9E-102;2.6E-102;5.3E-102	hypothetical protein [Bryobacter aggregatus]	1.4e-208	420	420	1	409	81.67
MGYP000420822625	alpha/beta fold hydrolase	242	6.8E-69;5.5E-65;4.0E-63;8.1E-63;1.3E-61;2.9E-60;2.3E-59;5.7E-58;8.1E-56;2.8E-55;3.4E-54;1.7E-51;8.0E-51;1.8E-50;1.9E-50;1.6E-49;1.8E-49;2.2E-49;2.4E-49;5.1E-49	alpha/beta fold hydrolase [Citricoccus sp. I39-566]	6.8e-69	235	237	1	237	63.29
MGYP000423047263	alpha/beta fold hydrolase	226	3.4E-56;1.8E-55;2.0E-55;4.2E-55;4.2E-55;1.7E-54;2.2E-54;2.2E-54;3.2E-54;3.2E-54;4.5E-54;4.7E-54;6.3E-54;6.3E-54;6.3E-54;6.3E-54;8.7E-54;1.0E-53;1.2E-53;1.9E-53	alpha/beta fold hydrolase [Leptolyngbya sp. FACHB-261]	3.4e-56	277	224	3	226	62.5
MGYP000423230656	alpha/beta hydrolase	203	3.1E-69;5.3E-69;1.2E-68;7.5E-67;7.6E-67;8.2E-67;1.8E-66;2.7E-66;6.9E-66;2.9E-65;3.3E-65;3.8E-65;4.4E-65;1.3E-64;1.3E-64;3.1E-64;3.3E-64;3.4E-64;3.4E-64;3.4E-64	alpha/beta hydrolase [Pseudorhodoferax sp.]	3.1e-69	190	178	16	193	73.03
MGYP000423910040	lipase family protein	239	2.2E-86;4.7E-85;4.9E-83;9.3E-81;3.4E-78;2.0E-75;1.1E-74;7.9E-73;2.9E-72;4.5E-72;1.7E-71;1.7E-71;2.3E-71;4.7E-71;5.9E-29;1.2E-28;1.7E-28;3.3E-28;1.4E-23;1.9E-23	lipase family protein [Hydrogenoanaerobacterium saccharovorans]	2.2e-86	225	220	18	237	72.73
MGYP000424293401	alpha/beta fold hydrolase	283	1.1E-111;3.9E-110;6.0E-105;1.8E-104;4.4E-104;9.8E-104;1.1E-100;3.6E-100;5.2E-100;8.7E-100;1.3E-99;1.5E-99;4.2E-99;4.5E-99;7.5E-99;8.7E-99;6.2E-98;6.6E-98;1.0E-97;1.6E-97	alpha/beta fold hydrolase [Aureispira anguillae]	1.1e-111	283	281	1	280	72.24
MGYP000424458506	lipase family protein	293	1.5E-152;3.7E-138;8.3E-135;7.1E-88;1.7E-76;1.1E-75;1.1E-75;1.1E-75;1.6E-75;3.5E-74;5.7E-74;2.8E-73;4.9E-73;1.3E-71;9.6E-61;2.9E-51;1.8E-48;9.5E-48;1.1E-47;1.3E-47	lipase family protein [Serratia fonticola]	1.5e-152	294	291	1	291	80.76
MGYP000424948560	alpha/beta fold hydrolase	259	4.7E-99;9.8E-91;9.8E-91;9.8E-91;1.4E-90;2.0E-90;2.0E-90;2.0E-90;2.8E-90;5.6E-90;5.6E-90;5.6E-90;8.0E-90;8.0E-90;1.6E-89;1.6E-89;2.3E-89;6.5E-89;9.2E-89;9.2E-89	alpha/beta fold hydrolase [Dysosmobacter sp.]	4.7e-99	260	260	1	259	68.46
MGYP000426710567	alpha/beta fold hydrolase	215	1.5E-54;4.8E-54;2.4E-53;4.7E-53;6.0E-53;7.2E-53;9.8E-53;1.3E-52;1.3E-52;1.3E-52;2.0E-52;2.2E-52;2.2E-52;3.4E-52;4.1E-52;4.3E-52;8.2E-52;1.2E-51;2.5E-51;7.2E-51	alpha/beta fold hydrolase [Cystobacter ferrugineus]	1.5e-54	230	203	11	204	65.52
MGYP000427502163	predicted protein	326	1.0E-129;1.1E-95;4.1E-44;3.4E-41;8.7E-37;1.1E-36;8.0E-36;8.1E-36;2.8E-35;2.9E-35;3.0E-35;3.1E-35;1.1E-34;2.4E-34;3.1E-34;3.3E-34;3.6E-34;3.8E-34;3.9E-34;3.9E-34	predicted protein [Phaeodactylum tricornutum CCAP 1055/1]	1e-129	814	320	5	323	74.69
MGYP000429001719	3-oxoadipate enol-lactonase	256	9.5E-84;9.5E-84;1.1E-83;8.7E-83;3.9E-81;8.1E-81;3.6E-80;5.3E-80;1.1E-79;1.1E-79;1.5E-79;2.4E-79;1.2E-78;1.8E-78;2.2E-78;2.2E-78;2.5E-78;3.1E-78;3.5E-78;3.6E-78	3-oxoadipate enol-lactonase [Micromonospora pisi]	9.5e-84	262	247	6	252	67.61
MGYP000429016420	alpha/beta hydrolase	363	1.4E-205;5.0E-201;5.1E-199;1.0E-191;1.8E-187;1.4E-172;1.2E-171;1.2E-165;1.5E-159;7.3E-144;7.7E-140;3.6E-139;4.9E-139;5.2E-139;2.8E-138;3.2E-138;5.1E-138;6.1E-138;6.5E-137;3.7E-136	alpha/beta hydrolase [Occallatibacter riparius]	1.4e-205	360	354	8	361	88.42
MGYP000429038302	triacylglycerol lipase	230	7.6E-75;2.5E-74;5.1E-74;9.6E-74;1.2E-73;6.1E-73;8.3E-73;1.0E-72;1.7E-72;1.7E-72;2.0E-72;2.1E-72;2.4E-72;2.4E-72;2.4E-72;9.2E-72;1.1E-71;3.9E-71;3.9E-71;5.5E-71	triacylglycerol lipase [Streptomyces cynarae]	7.6e-75	224	208	22	229	69.23
MGYP000429698782	S-layer homology domain-containing protein	448	1.9E-48;6.5E-47;9.1E-36;8.0E-34;1.2E-33;1.5E-33;1.5E-33;1.7E-33;1.7E-33;2.4E-33;8.6E-33;9.5E-33;9.5E-33;1.2E-32;1.6E-32;3.1E-32;3.2E-32;3.4E-32;4.9E-32;1.0E-31	S-layer homology domain-containing protein [Intestinimonas butyriciproducens]	1.9e-48	667	315	64	374	53.97
MGYP000430463152	lipase family protein	260	8.3e-16	lipase family protein [Gordonibacter sp.]	8.3e-16	441	171	89	251	50.29
MGYP000432106446	3-oxoadipate enol-lactonase	246	5.0E-95;7.0E-95;2.0E-94;2.9E-94;4.0E-94;5.7E-94;1.1E-93;9.7E-93;1.9E-92;3.7E-92;3.0E-91;3.0E-91;1.2E-90;3.5E-90;1.4E-89;1.4E-89;2.3E-89;1.2E-88;1.7E-88;2.4E-88	3-oxoadipate enol-lactonase [Undibacterium oligocarboniphilum]	5e-95	259	244	1	244	72.13
MGYP000433103458	alpha/beta hydrolase	349	4.1E-79;7.2E-78;1.8E-74;1.0E-73;8.9E-73;4.1E-70;3.0E-69;6.4E-69;2.4E-61;3.4E-48;1.1E-40;1.5E-39;2.3E-39;5.0E-35;1.5E-33;6.2E-32;6.5E-32;8.6E-32;3.2E-31;4.0E-31	alpha/beta hydrolase [Echinicola shivajiensis]	4.1e-79	354	337	5	338	59.64
MGYP000433299154	alpha/beta hydrolase	292	9.5E-153;9.5E-130;1.1E-121;2.1E-104;2.5E-89;6.6E-89;1.9E-88;1.9E-86;2.0E-86;3.8E-86;7.7E-86;6.2E-85;1.4E-84;3.0E-82;6.5E-82;1.8E-80;3.1E-73;4.6E-70;2.8E-63;3.2E-52	alpha/beta hydrolase [Thioalkalivibrio sulfidiphilus]	9.5e-153	293	292	1	291	84.25
MGYP000434806120	alpha/beta hydrolase	245	1.0E-71;2.9E-71;7.5E-69;1.2E-61	alpha/beta hydrolase [Mesorhizobium sp.]	1e-71	246	240	5	244	68.33
MGYP000436058055	amino acid adenylation domain-containing protein, partial	369	5.5E-68;2.5E-67;7.1E-67;2.5E-66;3.1E-66;3.6E-66;8.5E-66;3.6E-63;3.7E-63;4.1E-63;9.4E-63;3.2E-62;2.6E-60;6.2E-60;5.7E-59;2.6E-58;2.1E-57;3.5E-57;4.0E-57;5.4E-57	amino acid adenylation domain-containing protein, partial [Pseudoalteromonas piscicida]	5.5e-68	797	360	6	352	56.67
MGYP000436245376	alpha/beta hydrolase	309	1.9E-25;5.6E-25;3.0E-24;5.7E-24;1.5E-23;1.6E-23;1.8E-23;5.5E-23;2.8E-22;3.2E-22;7.7E-22;7.7E-22;9.4E-22;1.2E-21;1.6E-21;2.0E-21;2.1E-21;2.2E-21;2.9E-21;2.9E-21	alpha/beta hydrolase [Archaeoglobus sp.]	1.9e-25	262	252	33	280	50.4
MGYP000438213927	alpha/beta hydrolase	301	6.6E-226;7.7E-225;4.4E-224;1.8E-223;2.0E-186;5.6E-186;6.2E-184;5.3E-142;1.1E-141;1.2E-140;2.5E-140;5.0E-140;3.0E-131;1.7E-130;3.4E-127;4.8E-127;4.8E-127;2.3E-126;4.5E-126;9.1E-126	alpha/beta hydrolase [Bifidobacterium crudilactis]	6.6e-226	301	301	1	301	99.34
MGYP000438572014	alpha/beta fold hydrolase	258	2.5E-133;3.6E-119;1.6E-118;3.0E-118;5.4E-114;8.1E-107;5.4E-105;6.9E-105;1.9E-104;4.6E-103;2.6E-102;3.7E-102;7.5E-102;8.9E-102;1.5E-101;2.1E-101;2.1E-101;4.3E-101;4.3E-101;4.3E-101	alpha/beta fold hydrolase [methanotrophic endosymbiont of Bathymodiolus puteoserpentis (Logatchev)]	2.5e-133	257	256	1	256	82.03
MGYP000438577431	alpha/beta fold hydrolase	298	8.6E-90;9.3E-85;7.9E-82;9.4E-67;6.3E-63;4.7E-62;1.0E-61;5.0E-61;5.0E-61;7.1E-61;1.0E-60;1.4E-60;1.4E-60;2.7E-60;2.8E-60;2.8E-60;3.8E-60;4.0E-60;4.0E-60;5.3E-60	alpha/beta fold hydrolase [Desulforapulum autotrophicum]	8.6e-90	249	249	47	295	67.47
MGYP000440740742	alpha/beta hydrolase	327	4.4E-59;4.3E-57;8.5E-55;2.0E-54;2.8E-54;2.8E-54;2.8E-54;3.9E-54;3.9E-54;1.1E-53;1.1E-53;1.5E-53;2.5E-53;6.1E-53;6.1E-53;6.1E-53;7.9E-53;8.2E-53;8.6E-53;1.2E-52	alpha/beta hydrolase [Leptospira perolatii]	4.4e-59	290	273	51	323	59.34
MGYP000440823897	3-oxoadipate enol-lactonase	229	1.3E-66;6.4E-66;1.5E-65;2.2E-65;6.0E-65;9.4E-65;3.5E-64;8.1E-64;8.9E-64;1.2E-63;4.1E-63;4.8E-63;5.7E-63;1.1E-62;1.4E-62;1.7E-62;2.8E-62;2.9E-62;3.8E-62;9.7E-62	3-oxoadipate enol-lactonase [Streptosporangium roseum]	1.3e-66	251	229	5	229	63.32
MGYP000440916156	lipase family protein	289	1.2E-23;6.2E-23;1.4E-22;9.2E-22;1.5E-21;3.5E-21;7.0E-21;8.4E-21;1.1E-20;1.1E-20;1.7E-20;2.4E-20;3.0E-20;3.0E-20;3.2E-20;3.9E-20;4.1E-20;4.4E-20;4.5E-20;5.5E-20	lipase family protein [Marinospirillum perlucidum]	1.2e-23	274	218	29	234	50.46
MGYP000442148268	alpha/beta hydrolase	261	1.0E-77;1.4E-77;9.9E-77;6.7E-75;7.7E-74;1.2E-73;5.2E-73;8.8E-73;1.8E-72;3.7E-72;5.0E-72;7.1E-72;7.1E-72;1.0E-71;3.0E-71;6.7E-71;8.2E-71;8.4E-71;1.7E-70;1.9E-70	alpha/beta hydrolase [Marinobacter santoriniensis]	1e-77	265	258	1	255	64.73
MGYP000443755568	lipase	173	2.2E-79;3.7E-74;1.9E-73;1.5E-72;1.6E-72;8.1E-72;4.9E-70;6.4E-70;7.5E-70;2.0E-69;2.8E-69;4.1E-69;8.7E-69;8.7E-69;2.8E-65;3.7E-65;4.7E-65;5.3E-65;7.1E-65;3.0E-64	lipase [Nocardioides marmorisolisilvae]	2.2e-79	361	175	1	173	80.57
MGYP000444310324	alpha/beta hydrolase	244	6.4E-41;1.2E-40;1.3E-39;3.9E-36;4.5E-35;9.4E-23;9.4E-23;3.3E-21;5.2E-21;8.3E-19;1.0E-18;2.5E-18;3.8E-18;6.1E-18;2.7E-17;5.3E-17;7.6E-17;5.2E-16	alpha/beta hydrolase [Capillimicrobium parvum]	6.4e-41	240	241	3	243	54.36
MGYP000444904159	alpha/beta hydrolase	294	4.9E-40;7.8E-39;1.1E-38;1.5E-38;1.5E-38;2.8E-38;6.0E-38;1.1E-37;1.1E-37;1.2E-37;1.6E-37;1.6E-37;3.3E-37;3.3E-37;4.4E-37;4.4E-37;4.7E-37;5.7E-37;6.1E-37;6.4E-37	alpha/beta hydrolase [Leptospira tipperaryensis]	4.9e-40	313	274	17	288	51.46
MGYP000445086402	alpha/beta hydrolase	259	3.3E-30;3.4E-29;3.4E-29;7.0E-29;7.1E-28;1.1E-27;4.0E-27;7.9E-27;7.9E-27;7.9E-27;1.0E-26;2.9E-26;3.0E-26;3.5E-26;3.6E-26;4.8E-26;6.9E-26;8.4E-26;2.3E-25;2.7E-25	alpha/beta hydrolase [Peribacillus simplex]	3.3e-30	264	269	1	259	53.16
MGYP000445220220	alpha/beta hydrolase	274	4.6E-57;3.2E-50;9.9E-44;3.3E-43;2.4E-41;1.0E-39;1.4E-39;4.9E-39;1.6E-37;5.4E-35;1.3E-34;1.5E-32;2.0E-32;2.2E-32;4.3E-32;2.3E-31;4.5E-31;6.3E-31;6.7E-30;9.9E-30	alpha/beta hydrolase [Pelolinea submarina]	4.6e-57	271	270	3	272	59.26
MGYP000445561308	hypothetical protein	300	3.9E-184;3.3E-102;6.6E-102;6.6E-102;6.6E-102;6.6E-102;4.4E-100;2.9E-98;5.6E-68;4.0E-59;7.2E-59;4.1E-58;6.1E-49;2.7E-48;3.1E-48;5.8E-47;6.7E-47;5.2E-46;5.2E-46;1.4E-39	hypothetical protein [Variovorax sp. HW608]	3.9e-184	303	303	1	300	89.44
MGYP000446601336	hypothetical protein	292	2.5E-75;4.0E-66;2.1E-64;5.1E-62;6.0E-61;1.0E-57;4.6E-41;1.3E-40;2.5E-40;6.9E-40;1.4E-39;1.9E-39;5.2E-39;6.3E-39;1.0E-38;1.8E-38;2.0E-38;2.0E-38;2.4E-38;2.8E-38	hypothetical protein [Methylocystis echinoides]	2.5e-75	387	297	1	291	65.66
MGYP000447381197	triacylglycerol lipase	458	3.7E-277;1.2E-210;1.0E-209;1.7E-174;2.7E-174;3.3E-174;5.4E-174;7.7E-174;1.1E-173;2.7E-173;4.4E-173;4.4E-173;5.4E-173;6.2E-173;6.2E-173;8.9E-173;8.9E-173;8.9E-173;8.9E-173;8.9E-173	triacylglycerol lipase [Candidatus Merdisoma sp. JLR.KK011]	3.7e-277	458	458	1	458	89.08
MGYP000448043486	alpha/beta hydrolase	283	3.3E-37;4.1E-37;6.6E-37;5.7E-33;2.2E-32;8.4E-32;3.3E-31;3.5E-31;4.2E-31;6.7E-31;3.0E-30;3.2E-30;6.4E-30;1.8E-28;5.1E-28;7.1E-28;9.7E-28;1.4E-27;2.5E-27;6.5E-27	alpha/beta hydrolase [Rubrobacter calidifluminis]	3.3e-37	376	243	72	283	52.26
MGYP000448130135	alpha/beta hydrolase	253	9.5E-91;1.2E-90;9.2E-82;5.3E-81;4.3E-80;4.9E-75;8.9E-75;7.2E-74;9.6E-73;3.7E-72;3.9E-72;3.9E-72;5.5E-72;7.3E-72;1.1E-71;1.3E-71;4.8E-70;4.3E-69;8.5E-69;1.2E-68	alpha/beta hydrolase [Roseobacter sp. H9]	9.5e-91	243	239	1	239	71.97
MGYP000449568287	alpha/beta hydrolase	435	7.2E-144;3.4E-91;3.0E-89;3.0E-89;8.4E-89;1.1E-87;1.6E-87;2.0E-87;3.2E-87;6.6E-87;1.1E-86;1.3E-86;4.1E-85;4.1E-85;5.8E-85;1.2E-84;2.8E-84;6.1E-84;9.1E-84;1.3E-83	alpha/beta hydrolase [uncultured Paraglaciecola sp.]	7.2e-144	424	420	22	433	71.67
MGYP000449569008	alpha/beta fold hydrolase	235	2.5E-25;6.3E-25;5.5E-23;5.1E-22;5.1E-22;1.1E-21;3.1E-21;3.7E-21;4.2E-21;8.1E-21;1.0E-20;1.1E-20;1.4E-20;1.5E-20;1.5E-20;2.1E-20;2.2E-20;2.2E-20;2.5E-20;2.8E-20	alpha/beta fold hydrolase [Euzebya pacifica]	2.5e-25	318	192	46	234	54.69
MGYP000449916868	lipase ZK262.3-like	425	2.6E-130;4.8E-124;4.0E-114;2.6E-109;2.0E-106;1.0E-98;2.0E-96;2.7E-81;2.9E-81;1.2E-80;1.4E-79;2.7E-78;2.7E-78;2.8E-77;1.8E-76;3.8E-76;5.8E-76;1.7E-75;3.3E-75;4.0E-74	lipase ZK262.3-like [Mercenaria mercenaria]	2.6e-130	452	382	19	392	69.63
MGYP000450686759	alpha/beta hydrolase	313	5.1E-25;5.1E-25;7.1E-25;9.9E-25;5.5E-24;7.2E-24;7.2E-24;7.2E-24;1.0E-23;1.4E-23;1.4E-23;1.4E-23;1.4E-23;5.2E-23;7.3E-23;7.3E-23;2.7E-22;8.4E-19;2.4E-17;2.4E-17	alpha/beta hydrolase [Bacillus sonorensis]	5.1e-25	273	262	56	311	53.05
MGYP000450843062	alpha/beta hydrolase	260	3.0E-172;2.4E-171;2.0E-170;2.4E-160;2.9E-160;8.2E-160;1.9E-159;6.0E-156;2.4E-155;5.7E-143;1.2E-142;1.1E-140;2.4E-140;1.4E-124;4.7E-123;7.1E-122;1.7E-120;2.5E-120;2.5E-120;2.5E-120	alpha/beta hydrolase [Roseivirga misakiensis]	3e-172	260	260	1	260	96.15
MGYP000450984111	alpha/beta hydrolase	262	3.3E-65;1.3E-64;7.5E-64;1.2E-62;1.9E-57;6.6E-57;1.1E-56;1.1E-56;1.3E-56;1.9E-56;1.9E-56;2.1E-56;3.0E-56;3.3E-56;4.2E-56;8.5E-56;8.5E-56;1.2E-55;1.7E-55;3.4E-55	alpha/beta hydrolase [Thermanaerothrix daxensis]	3.3e-65	261	264	1	262	62.88
MGYP000451418697	hypothetical protein	275	9.8E-160;9.5E-142;5.5E-141;5.9E-141;1.1E-140;1.2E-140;1.7E-140;2.8E-139;9.6E-137;2.3E-135;2.3E-135;2.5E-74;3.6E-74;2.8E-73;2.8E-73;4.0E-73;5.0E-73;5.5E-73;5.5E-73;5.5E-73	hypothetical protein [Treponema socranskii]	9.8e-160	274	273	3	275	89.01
MGYP000452497992	alpha/beta hydrolase	280	4.9E-146;1.2E-144;7.8E-143;4.9E-137;2.1E-133;8.6E-133;1.3E-129;2.7E-129;2.7E-129;5.5E-129;1.1E-128;2.2E-128;3.2E-128;3.2E-128;6.3E-128;2.6E-127;2.6E-127;3.7E-127;3.0E-126;3.1E-126	alpha/beta hydrolase [Candidatus Viridilinea mediisalina]	4.9e-146	278	280	1	280	84.29
MGYP000452538187	alpha/beta hydrolase	262	1.5E-52;1.5E-52;1.9E-33;6.1E-32;9.3E-32;3.4E-31;3.4E-31;1.1E-30;1.9E-30;1.4E-29;2.1E-29;3.5E-29;1.5E-28;2.1E-28;5.3E-28;7.2E-28;8.8E-28;1.3E-27;1.3E-27;1.4E-27	alpha/beta hydrolase [Corallococcus silvisoli]	1.5e-52	274	261	6	258	55.56
MGYP000452624450	lipase family protein	278	4.8E-39;3.7E-35;1.4E-34;2.6E-32;2.7E-30;5.4E-28;3.9E-26;4.9E-26;6.6E-26;7.2E-26;8.2E-26;3.5E-25;6.9E-25;9.4E-25;3.2E-24;3.4E-24;3.5E-24;6.2E-24;8.5E-24;1.4E-23	lipase family protein [Candidatus Velamenicoccus archaeovorus]	4.8e-39	300	200	9	198	65
MGYP000453147106	lipase, putative	161	2.1E-16;4.0E-16	lipase, putative [Leishmania panamensis]	2.1e-16	373	132	1	125	57.58
MGYP000453274247	alpha/beta fold hydrolase	293	6.6E-51;4.3E-43;7.1E-35;1.5E-34;1.7E-34;2.3E-33;3.2E-32;5.3E-32;5.3E-32;1.1E-31;1.2E-31;2.3E-30;2.2E-27;3.0E-27;4.5E-20;3.1E-19;6.9E-19;1.7E-18;1.1E-17;1.6E-17	alpha/beta fold hydrolase [Dictyobacter vulcani]	6.6e-51	890	280	8	280	56.43
MGYP000455486402	lipase family protein	263	2.1E-25;1.5E-24;4.6E-22;1.2E-21;1.2E-21;1.6E-21;2.2E-21;3.3E-21;3.8E-21;5.9E-21;7.8E-21;8.2E-21;9.0E-21;9.8E-21;1.1E-20;1.2E-20;1.3E-20;1.4E-20;1.9E-20;1.9E-20	lipase family protein [Pseudorhodoplanes sp.]	2.1e-25	305	175	59	224	52.57
MGYP000456217096	alpha/beta fold hydrolase	293	8.6E-66;2.8E-24;2.6E-22;5.0E-22;6.9E-22;6.9E-22;1.3E-21;6.2E-21;1.2E-20;1.3E-20;1.7E-20;1.8E-20;1.2E-19;2.3E-19;4.5E-19;4.8E-19;6.3E-19;9.1E-19;3.2E-18;3.5E-18	alpha/beta fold hydrolase [Fimbriimonas ginsengisoli]	8.6e-66	296	270	15	284	57.04
MGYP000456265892	lipase family protein	358	3.9E-128;8.5E-125;6.2E-120;1.2E-115;3.4E-115;3.5E-115;1.4E-114;1.5E-114;3.0E-114;3.4E-113;3.4E-113;2.5E-112;3.8E-112;1.6E-111;3.2E-111;9.9E-110;3.4E-107;4.4E-106;4.5E-106;8.0E-106	lipase family protein [Marinomonas sargassi]	3.9e-128	351	348	1	348	74.14
MGYP000458481603	lipase family protein	194	4.6E-53;9.2E-53;5.8E-51;8.4E-51;8.9E-51;1.2E-50;1.6E-50;1.6E-50;2.2E-50;2.2E-50;2.3E-50;2.4E-50;4.5E-50;4.6E-50;1.3E-49;1.7E-49;2.4E-49;2.6E-49;2.6E-49;3.6E-49	lipase family protein [Mycobacterium sp.]	4.6e-53	254	192	1	187	65.62
MGYP000459644421	alpha/beta hydrolase	290	3.1E-45;2.0E-42;4.0E-42;7.3E-42;1.0E-41;1.0E-41;1.4E-41;1.5E-41;2.3E-41;3.0E-41;4.0E-41;4.2E-41;4.2E-41;4.2E-41;1.1E-40;1.5E-40;1.5E-40;1.5E-40;1.5E-40;1.6E-40	alpha/beta hydrolase [Leptospira gomenensis]	3.1e-45	316	250	31	276	53.2
MGYP000461463306	alpha/beta fold hydrolase	322	2.0E-145;4.3E-130;1.0E-128;1.9E-128;5.6E-128;7.2E-126;3.4E-125;5.9E-125;1.3E-124;3.3E-122;5.6E-122;8.4E-122;1.6E-121;3.2E-121;6.9E-121;2.0E-120;2.3E-120;7.5E-120;1.9E-119;5.1E-119	alpha/beta fold hydrolase [Trebonia kvetii]	2e-145	331	295	28	322	84.41
MGYP000461585712	alpha/beta fold hydrolase	305	1.0E-222;5.4E-185;1.9E-168;6.2E-160;2.8E-152;2.1E-143;2.0E-140;7.2E-140;1.3E-139;7.3E-139;9.3E-139;1.0E-138;1.3E-138;2.8E-138;3.8E-138;1.4E-137;1.9E-128;7.4E-127;6.3E-125;7.0E-124	alpha/beta fold hydrolase [Gordonia sp. (in: high G+C Gram-positive bacteria)]	1e-222	305	305	1	305	100
MGYP000461697690	MULTISPECIES: lipase	194	1.3E-122;1.1E-103;2.1E-99;2.1E-87;4.6E-87;4.6E-87;1.3E-86;2.6E-86;2.6E-86;3.8E-86;1.5E-85;2.0E-79;3.3E-77;4.7E-77;6.7E-77;9.5E-77;1.1E-75;1.9E-75;1.7E-74;2.1E-74	MULTISPECIES: lipase [unclassified Shewanella]	1.3e-122	195	191	1	191	93.72
MGYP000462684921	alpha/beta fold hydrolase	283	2.2E-84;9.1E-84;1.2E-83;1.8E-83;2.6E-83;5.2E-83;2.4E-81;6.9E-78;6.6E-77;8.2E-77;1.2E-76;3.2E-75;4.3E-74;1.6E-73;2.4E-73;2.4E-73;2.8E-73;8.2E-71;5.8E-69;8.5E-69	alpha/beta fold hydrolase [Microbulbifer agarilyticus]	2.2e-84	272	267	12	278	66.29
MGYP000462789598	alpha/beta fold hydrolase	252	2e-25	alpha/beta fold hydrolase [Candidatus Protochlamydia phocaeensis]	2e-25	317	216	33	235	53.24
MGYP000462798638	MULTISPECIES: triacylglycerol lipase	334	9.5E-238;3.9E-237;3.9E-237;1.1E-236;1.1E-236;4.5E-236;8.6E-225;4.9E-224;1.6E-220;3.7E-220;5.0E-218;4.1E-217;2.0E-178;2.8E-178;8.1E-178;3.3E-177;6.7E-177;6.7E-177;9.4E-177;9.4E-177	MULTISPECIES: triacylglycerol lipase [Acinetobacter]	9.5e-238	334	334	1	334	100
MGYP000463722024	alpha/beta hydrolase	260	1.8E-164;3.5E-163;1.3E-158;1.3E-74;5.4E-65;4.2E-61;8.2E-61;8.5E-61;1.9E-60;5.3E-60;7.4E-60;1.5E-59;2.1E-59;2.1E-59;2.6E-59;6.0E-59;8.4E-59;8.4E-59;1.8E-58;5.0E-58	alpha/beta hydrolase [Fournierella sp.]	1.8e-164	251	251	10	260	96.41
MGYP000464290894	alpha/beta hydrolase	275	3.3E-119;1.7E-77;2.8E-76;2.8E-76;5.7E-76;3.1E-73;9.9E-72;1.5E-71;2.0E-71;2.1E-71;5.7E-71;5.7E-71;8.3E-71;2.3E-70;6.3E-68;1.2E-67;4.7E-67;9.5E-67;9.5E-67;1.3E-66	alpha/beta hydrolase [Kallotenue papyrolyticum]	3.3e-119	277	276	1	275	76.09
MGYP000464758618	MULTISPECIES: alpha/beta hydrolase	233	6.7E-127;2.2E-125;2.2E-125;1.3E-124;1.3E-124;3.7E-124;3.5E-66;2.0E-65;5.7E-65;7.8E-64;1.9E-63;2.8E-63;2.9E-63;4.1E-63;7.7E-63;8.1E-63;1.0E-62;1.2E-62;1.6E-62;2.1E-62	MULTISPECIES: alpha/beta hydrolase [Eisenbergiella]	6.7e-127	278	204	8	211	92.65
MGYP000464929771	alpha/beta hydrolase	287	3.9E-57;2.4E-55;3.1E-55;1.2E-54;2.5E-54;3.8E-54;7.3E-54;7.5E-54;1.0E-53;1.6E-53;1.6E-53;1.7E-53;2.1E-53;2.2E-53;2.8E-53;3.0E-53;3.8E-53;4.4E-53;6.1E-53;2.0E-52	alpha/beta hydrolase [Microbulbifer yueqingensis]	3.9e-57	335	274	1	273	56.57
MGYP000465866339	alpha/beta hydrolase	282	6.3E-109;3.2E-104;4.6E-104;4.6E-104;9.2E-104;1.3E-103;1.3E-103;3.7E-103;3.9E-102;4.3E-102;6.1E-102;7.8E-102;1.1E-101;1.1E-101;3.5E-101;6.8E-98;2.8E-97;5.9E-97;1.1E-96;1.2E-96	alpha/beta hydrolase [Aliifodinibius sp. S!AR15-10]	6.3e-109	286	274	9	282	75.18
MGYP000467511733	alpha/beta fold hydrolase	260	1.4E-93;6.7E-90;2.1E-83;1.2E-82;4.8E-82;9.6E-82;9.6E-82;1.4E-81;1.9E-81;3.9E-81;5.5E-81;7.8E-81;3.1E-80;3.1E-80;6.3E-80;1.3E-79;1.8E-79;3.6E-79;2.2E-65;5.6E-62	alpha/beta fold hydrolase [Aurantimicrobium minutum]	1.4e-93	260	259	1	259	68.73
MGYP000468370456	alpha/beta hydrolase	263	3.1E-56;3.6E-56;1.3E-55;2.5E-55;6.3E-54;6.8E-54;2.1E-53;3.8E-53;1.3E-52;1.5E-52;1.0E-51;1.6E-51;1.6E-51;1.9E-51;2.1E-51;2.9E-51;3.5E-51;5.1E-51;5.9E-51;8.1E-51	alpha/beta hydrolase [Streptomyces sp. HUAS 2-6]	3.1e-56	278	261	4	263	55.56
MGYP000468682321	alpha/beta fold hydrolase	286	2.9E-31;4.0E-31;2.2E-30;2.2E-30;3.1E-30;4.9E-30;8.5E-30;1.2E-29;2.1E-29;2.7E-29;3.3E-29;3.7E-29;5.3E-29;9.0E-29;2.8E-28;2.9E-28;2.9E-28;3.5E-28;4.6E-28;5.6E-28	alpha/beta fold hydrolase [Streptomyces justiciae]	2.9e-31	259	256	27	279	51.56
MGYP000469712317	alpha/beta hydrolase	294	1.2E-211;9.5E-211;3.9E-210;5.1E-210;7.8E-210;1.1E-209;3.2E-209;3.2E-209;4.2E-209;1.3E-208;1.3E-208;1.3E-208;1.7E-208;1.9E-208;4.9E-208;1.4E-207;5.7E-207;3.7E-190;8.8E-189;7.0E-188	alpha/beta hydrolase [Levilactobacillus brevis]	1.2e-211	294	294	1	294	100
MGYP000471007809	alpha/beta hydrolase	263	5.6E-99;8.0E-99;1.6E-98;3.2E-98;9.6E-98;2.6E-97;1.1E-96;9.9E-90;7.0E-88;3.9E-87;5.6E-87;1.5E-84;9.6E-81;7.5E-74;8.5E-74;1.0E-73;1.2E-73;1.7E-73;2.1E-73;2.9E-73	alpha/beta hydrolase [Thalassolituus sp. ST750PaO-4]	5.6e-99	261	257	1	257	73.54
MGYP000471491335	lipase family protein	234	3.6E-20;2.9E-17;1.6E-16;2.2E-16;3.2E-16;3.6E-16;3.6E-16;5.5E-16;5.8E-16;6.3E-16;6.4E-16	lipase family protein [Hydrogenoanaerobacterium saccharovorans]	3.6e-20	225	203	1	196	50.74
MGYP000471736598	alpha/beta fold hydrolase	274	9.1E-112;4.4E-100;4.7E-100;6.4E-100;9.1E-100;1.8E-99;7.4E-99;7.4E-99;1.0E-98;1.0E-98;1.4E-98;1.4E-98;1.5E-98;2.0E-98;2.1E-98;2.9E-98;4.4E-98;4.4E-98;8.3E-98;8.3E-98	alpha/beta fold hydrolase [Maribacter algarum]	9.1e-112	257	203	70	272	88.67
MGYP000473181718	triacylglycerol lipase	205	2.7E-139;1.4E-138;4.4E-136;9.0E-136;7.7E-134;2.2E-133;2.2E-133;2.4E-133;4.5E-133;1.3E-132;1.3E-132;1.8E-132;5.2E-132;6.1E-131;5.5E-129;1.2E-128;9.7E-128;1.1E-124;9.9E-124;1.3E-121	triacylglycerol lipase [Oscillatoria nigro-viridis]	2.7e-139	207	205	1	205	98.54
MGYP000473263588	hypothetical protein	339	1.2E-79;4.4E-79;8.1E-79;6.2E-78;3.1E-77;1.1E-76;1.4E-76;2.9E-76;5.7E-76;1.1E-75;1.1E-75;1.4E-75;1.4E-75;1.4E-75;1.6E-75;3.2E-75;1.5E-74;7.7E-74;9.7E-74;1.8E-73	hypothetical protein [Streptomyces sp. N50]	1.2e-79	479	336	5	339	56.55
MGYP000473916414	alpha/beta fold hydrolase	276	1.7E-62;5.9E-62;8.0E-62;1.5E-61;1.6E-61;1.6E-61;3.3E-61;8.6E-61;1.1E-60;1.2E-60;1.4E-60;2.6E-60;2.7E-60;2.7E-60;4.7E-60;1.5E-59;1.7E-59;2.1E-59;6.5E-59;1.8E-58	alpha/beta fold hydrolase [Citreicoccus inhibens]	1.7e-62	267	249	1	247	63.86
MGYP000473965416	alpha/beta fold hydrolase	281	3.1E-165;4.2E-124;3.4E-123;4.0E-122;2.5E-121;1.8E-103;7.7E-103;1.3E-101;1.8E-101;7.2E-101;7.2E-101;1.0E-100;1.4E-100;1.4E-100;1.4E-100;2.1E-100;2.9E-100;2.9E-100;5.9E-100;5.9E-100	alpha/beta fold hydrolase [methanotrophic endosymbiont of Bathymodiolus puteoserpentis (Logatchev)]	3.1e-165	257	257	25	281	92.61
MGYP000474390727	hypothetical protein H257_08074	186	1.6E-19;2.2E-19;3.0E-19;4.2E-19;1.2E-18;1.9E-18;3.5E-18;3.5E-18;3.5E-18;3.6E-18;3.6E-18;6.7E-18;6.8E-18;8.1E-18;1.2E-17;1.3E-17;1.3E-17;1.6E-17;1.8E-17;1.9E-17	hypothetical protein H257_08074 [Aphanomyces astaci]	1.6e-19	934	172	4	165	55.81
MGYP000474667531	alpha/beta hydrolase	266	5.2E-77;1.0E-76;1.0E-76;1.5E-76;1.5E-76;4.2E-76;4.2E-76;6.0E-76;6.0E-76;7.0E-76;8.5E-76;1.2E-75;1.2E-75;3.4E-75;3.4E-75;4.9E-75;6.6E-75;1.0E-74;1.0E-74;1.4E-74	alpha/beta hydrolase [Pseudomonas extremaustralis]	5.2e-77	267	263	1	260	66.16
MGYP000474700496	alpha/beta fold hydrolase	251	1.7E-125;1.4E-124;1.5E-123;4.9E-122;6.9E-122;6.9E-122;3.6E-115;2.2E-114;3.0E-114;4.2E-114;7.2E-113;1.1E-112;2.0E-112;2.1E-112;2.1E-112;2.1E-112;2.6E-112;2.6E-112;2.7E-112;4.1E-112	alpha/beta fold hydrolase [Shimia litoralis]	1.7e-125	269	248	1	248	83.47
MGYP000475031792	alpha/beta fold hydrolase, partial	273	3.0E-120;4.2E-120;7.2E-119;1.0E-118;2.1E-118;5.5E-118;1.7E-114;1.4E-113;4.2E-109;1.1E-108;1.6E-108;2.0E-107;4.2E-106;6.9E-103;1.2E-100;1.6E-97;1.3E-96;1.5E-92;9.8E-91;1.9E-83	alpha/beta fold hydrolase, partial [Butyrivibrio sp. XPD2002]	3e-120	270	270	4	273	76.3
MGYP000476118656	alpha/beta hydrolase	263	2.6E-172;7.5E-172;1.5E-171;1.5E-171;2.5E-154;1.4E-151;5.1E-109;1.0E-108;1.4E-106;1.6E-106;2.3E-100;8.3E-99;4.3E-93;3.2E-92;2.4E-81;4.8E-81;6.8E-81;3.0E-75;4.2E-75;3.8E-73	alpha/beta hydrolase [Candidatus Pseudothioglobus singularis]	2.6e-172	263	262	1	262	96.95
MGYP000476342306	alpha/beta hydrolase	272	1.4E-146;5.6E-144;5.6E-144;5.6E-144;7.9E-144;1.1E-143;1.1E-143;1.1E-143;1.1E-143;1.1E-143;1.6E-143;1.6E-143;1.6E-143;1.6E-143;1.6E-143;2.3E-143;2.3E-143;2.3E-143;2.3E-143;3.2E-143	alpha/beta hydrolase [Bradyrhizobium sp. 186]	1.4e-146	272	270	1	270	87.04
MGYP000477580534	alpha/beta hydrolase	270	1.3E-36;3.4E-32;2.0E-20;8.7E-19;1.5E-18;2.0E-18;2.9E-18;3.6E-18;7.0E-18;1.5E-17;2.2E-17;3.2E-17;4.2E-17;4.4E-17;5.8E-17;6.1E-17;8.0E-17;1.5E-16;1.5E-16;2.1E-16	alpha/beta hydrolase [Deinococcus soli (ex Cha et al. 2016)]	1.3e-36	302	247	20	262	53.85
MGYP000479265658	alpha/beta hydrolase	259	1.6E-52;9.0E-52;1.6E-51;1.6E-51;1.2E-48;2.3E-48;3.2E-48;3.3E-48;4.6E-48;4.6E-48;9.3E-48;1.2E-47;1.3E-47;2.6E-47;3.7E-47;7.3E-47;1.0E-46;2.9E-46;4.1E-46;7.8E-46	alpha/beta hydrolase [Legionella micdadei]	1.6e-52	267	261	1	257	60.54
MGYP000479688265	alpha/beta hydrolase	286	1.8E-46;2.5E-45;1.6E-44;2.2E-44;3.8E-44;1.8E-43;2.9E-43;3.7E-43;4.1E-43;6.9E-43;1.2E-42;2.3E-42;2.7E-41;2.7E-41;3.5E-40;3.7E-40;8.0E-40;8.7E-40;2.8E-39;7.3E-39	alpha/beta hydrolase [Marinomonas algicola]	1.8e-46	279	233	44	274	57.94
MGYP000479808493	predicted protein	312	7.5e-32	predicted protein [Thalassiosira pseudonana CCMP1335]	7.5e-32	1888	220	1	215	55.91
MGYP000480485098	alpha/beta hydrolase	257	1.0E-55;8.1E-55;1.6E-54;4.2E-54;4.8E-54;2.8E-53;3.1E-53;5.3E-53;8.1E-53;1.3E-52;2.9E-51;7.0E-49;2.0E-48;2.7E-48;2.8E-48;4.4E-48;5.5E-48;8.2E-48;2.2E-47;3.1E-47	alpha/beta hydrolase [Granulicella mallensis]	1e-55	267	253	1	252	59.68
MGYP000480532033	alpha/beta hydrolase	263	6.2E-196;3.6E-138;5.2E-138;8.5E-137;3.5E-136;1.4E-111;1.6E-110;2.3E-110;4.6E-110;6.5E-110;9.2E-110;1.3E-109;2.6E-109;6.3E-96;1.5E-91;1.9E-80;3.5E-78;6.2E-78;2.4E-71;2.8E-70	alpha/beta hydrolase [uncultured Thalassolituus sp.]	6.2e-196	263	263	1	263	100
MGYP000482062622	predicted protein	192	9.9E-41;7.3E-25	predicted protein [Thalassiosira pseudonana CCMP1335]	9.9e-41	370	183	9	191	58.47
MGYP000482322906	alpha/beta hydrolase	267	5.2E-102;1.7E-70;6.4E-69;2.6E-68;9.6E-68;3.0E-67;4.1E-67;5.8E-67;5.8E-67;8.5E-67;9.7E-67;1.2E-66;1.7E-66;1.7E-66;2.3E-66;2.4E-66;3.3E-66;3.3E-66;4.3E-66;4.4E-66	alpha/beta hydrolase [Lewinella cohaerens]	5.2e-102	267	260	6	263	75
MGYP000483013328	lipase ZK262.3-like	236	2.3E-174;7.3E-171;6.6E-151;1.8E-115;2.1E-110;8.5E-110;1.7E-109;3.4E-109;9.5E-109;1.4E-108;5.6E-108;1.3E-107;6.2E-107;7.3E-107;9.4E-107;7.6E-99;8.3E-97;2.6E-86;9.0E-85;7.2E-78	lipase ZK262.3-like [Pocillopora damicornis]	2.3e-174	356	236	1	236	99.58
MGYP000485663423	predicted protein	432	1.4E-161;2.5E-144;2.8E-79;8.3E-78;2.4E-77;2.8E-22;4.1E-18;6.0E-17;6.3E-17;7.4E-17;4.1E-16	predicted protein [Ostreococcus lucimarinus CCE9901]	1.4e-161	672	445	1	429	73.71
MGYP000485776253	alpha/beta hydrolase	280	1.0E-37;1.9E-31;6.2E-31;6.8E-31;1.9E-30;1.0E-29;1.4E-29;1.4E-29;5.4E-29;1.2E-28;1.5E-28;5.6E-28;1.7E-27;1.9E-27;3.0E-27;3.7E-27;4.1E-27;4.2E-27;4.2E-27;5.2E-27	alpha/beta hydrolase [Fodinibius roseus]	1e-37	283	270	15	278	53.7
MGYP000486063702	lipase family protein	295	6.2E-123;2.5E-122;1.5E-121;2.0E-121;4.1E-121;2.2E-118;3.2E-118;9.3E-94;3.6E-81;5.5E-74;1.6E-73;3.3E-68;1.2E-54;2.7E-50;5.8E-48;3.9E-47;6.4E-47;3.3E-42;4.6E-42;1.3E-41	lipase family protein [Pseudomonas sp. R76]	6.2e-123	300	298	1	290	71.48
MGYP000486266439	predicted protein	247	5.0E-38;3.4E-28	predicted protein [Thalassiosira pseudonana CCMP1335]	5e-38	370	239	2	219	55.65
MGYP000486471226	alpha/beta hydrolase	243	1.5E-53;2.2E-50;3.1E-50;4.7E-50;6.3E-50;1.3E-49;2.6E-49;3.1E-49;3.2E-49;4.8E-49;5.0E-49;6.8E-49;9.8E-49;1.4E-48;1.9E-48;2.7E-48;2.8E-48;2.8E-48;2.8E-48;3.8E-48	alpha/beta hydrolase [Acinetobacter piscicola]	1.5e-53	300	237	14	242	61.6
MGYP000487924136	alpha/beta hydrolase	240	1.7E-22;6.7E-19;8.8E-19;8.8E-19;1.2E-18;1.4E-18;2.0E-18;1.5E-17;4.3E-17;6.2E-17;8.5E-17;8.7E-17;8.7E-17;4.1E-16	alpha/beta hydrolase [Polaromonas eurypsychrophila]	1.7e-22	323	235	6	222	53.62
MGYP000488620260	uncharacterized protein O0I10_009627	218	1.8E-133;1.3E-97;1.7E-91;3.5E-89;4.3E-89;6.1E-88;2.3E-86;5.9E-86;6.1E-84;5.0E-79;2.2E-78;1.1E-77;1.8E-77;1.9E-77;3.4E-77;1.0E-71;4.0E-71;8.0E-64;8.6E-64;2.0E-62	uncharacterized protein O0I10_009627 [Lichtheimia ornata]	1.8e-133	1083	218	1	218	96.33
MGYP000488696145	alpha/beta fold hydrolase	426	2.9E-315;2.3E-188;3.6E-137;5.1E-135;1.9E-128;9.9E-121;6.4E-119;1.0E-117;5.9E-117;2.4E-113;2.3E-109;2.7E-109;1.0E-107;1.8E-107;5.3E-101;1.1E-100;1.5E-100;2.1E-100;2.1E-100;2.1E-100	alpha/beta fold hydrolase [Povalibacter sp.]	2.9E-315	426	426	1	426	100
MGYP000489128722	MULTISPECIES: lipase family protein	244	1.9E-131;2.7E-131;2.8E-131;3.8E-131;3.8E-131;3.8E-131;3.8E-131;5.4E-131;5.4E-131;1.5E-130;3.1E-130;3.1E-130;3.1E-130;3.1E-130;4.4E-130;6.2E-130;6.2E-130;6.2E-130;6.2E-130;8.8E-130	MULTISPECIES: lipase family protein [unclassified Pseudoalteromonas]	1.9e-131	388	244	1	244	85.66
MGYP000491084251	alpha/beta hydrolase	274	8.1E-77;1.3E-56;3.3E-54;1.5E-53;5.7E-53;1.3E-52;3.0E-51;3.1E-51;1.8E-50;2.1E-50;3.6E-50;6.0E-50;8.7E-50;1.3E-49;2.3E-49;2.7E-49;4.4E-49;1.0E-48;1.8E-48;2.7E-48	alpha/beta hydrolase [Candidatus Entotheonella palauensis]	8.1e-77	250	244	25	268	65.98
MGYP000491418097	alpha/beta hydrolase [	232	8.1E-166;6.7E-165;6.7E-165;1.4E-164;2.7E-164;1.7E-158;4.8E-158;2.8E-143;2.0E-117;8.0E-117;1.9E-115;2.1E-87;8.8E-87;8.8E-87;2.3E-86;3.4E-86;5.9E-86;6.9E-86;9.2E-86;9.8E-86	alpha/beta hydrolase [[Clostridium] innocuum]	8.1e-166	313	232	1	232	100
MGYP000491494143	uncharacterized protein ZYRO0D01980g	370	1.9E-199;6.7E-148;2.5E-129;3.3E-126;4.3E-126;3.9E-124;3.3E-123;6.6E-123;9.6E-123;1.5E-122;1.9E-122;6.5E-122;1.7E-121;1.8E-121;3.3E-119;1.4E-116;4.0E-114;1.7E-113;6.8E-110;1.2E-108	uncharacterized protein ZYRO0D01980g [Zygosaccharomyces rouxii]	1.9e-199	366	367	7	370	85.29
MGYP000491678620	lipase family protein	291	1.5E-99;1.2E-84;7.1E-66;2.7E-63;8.8E-60;1.0E-58;2.6E-56;3.4E-56;1.1E-54;3.2E-54;5.8E-54;1.7E-52;3.4E-52;1.5E-50;2.1E-50;2.3E-50;3.6E-50;3.9E-50;4.3E-50;8.5E-50	lipase family protein [Candidatus Velamenicoccus archaeovorus]	1.5e-99	305	304	2	290	67.43
MGYP000491969517	alpha/beta hydrolase	283	8.6E-137;9.4E-132;6.2E-55;6.2E-55;2.5E-54;3.5E-54;7.0E-54;7.0E-54;2.0E-53;2.8E-53;2.8E-53;7.8E-53;1.5E-52;1.5E-52;1.5E-52;2.2E-52;9.7E-52;1.2E-51;1.7E-51;2.0E-51	alpha/beta hydrolase [Portibacter marinus]	8.6e-137	272	270	1	270	82.59
MGYP000493769822	alpha/beta hydrolase	252	2.9E-123;3.8E-115;4.5E-115;1.0E-111;1.1E-108;8.3E-90;5.1E-89;5.1E-89;1.4E-88;2.9E-88;5.3E-88;1.5E-87;1.6E-87;4.5E-87;2.6E-86;3.0E-86;7.5E-86;2.1E-85;3.0E-85;1.2E-84	alpha/beta hydrolase [Frisingicoccus sp.]	2.9e-123	255	246	5	250	82.11
MGYP000494416920	uncharacterized protein GSPATT00038131001	169	5.8E-22;1.5E-18;4.7E-18;5.2E-18	uncharacterized protein GSPATT00038131001 [Paramecium tetraurelia]	5.8e-22	280	177	1	169	54.24
MGYP000494919710	3-oxoadipate enol-lactonase	269	7.5E-106;1.1E-105;1.5E-105;1.5E-105;1.5E-105;6.2E-105;1.2E-104;1.2E-104;1.8E-104;1.8E-104;1.8E-104;2.5E-104;2.5E-104;2.5E-104;3.5E-104;3.5E-104;3.5E-104;5.0E-104;5.0E-104;7.1E-104	3-oxoadipate enol-lactonase [uncultured Ruegeria sp.]	7.5e-106	262	261	1	258	77.39
MGYP000495227769	alpha/beta fold hydrolase	313	7.1E-202;1.1E-173;5.9E-171;2.4E-151;8.4E-132;2.4E-130;1.6E-129;4.0E-129;6.0E-129;9.2E-129;5.3E-128;6.3E-128;1.1E-127;2.9E-127;3.7E-127;2.1E-126;1.1E-124;1.2E-124;1.6E-124;2.6E-124	alpha/beta fold hydrolase [Massilia agrisoli]	7.1e-202	313	313	1	313	95.53
MGYP000495305113	alpha/beta hydrolase	290	2.9E-203;9.2E-125;3.8E-106;8.3E-105;8.7E-104;3.1E-102;3.3E-101;7.0E-98;1.5E-97;7.7E-96;1.9E-95;4.8E-87;9.6E-87;3.1E-85;7.4E-84;8.3E-83;1.9E-82;2.2E-82;6.4E-80;1.2E-79	alpha/beta hydrolase [Flagellatimonas centrodinii]	2.9e-203	290	290	1	290	100
MGYP000495354119	alpha/beta fold hydrolase	247	2.4E-83;3.3E-83;1.5E-55;2.9E-47;2.9E-47;1.3E-45;8.4E-45;8.3E-41	alpha/beta fold hydrolase [Persicimonas caeni]	2.4e-83	258	253	2	247	64.43
MGYP000497079292	alpha/beta fold hydrolase	255	1.2E-173;1.9E-161;7.5E-150;1.2E-146;2.6E-143;7.4E-143;7.4E-143;1.5E-142;1.5E-142;1.5E-142;2.1E-142;4.3E-142;1.4E-140;2.0E-140;4.1E-140;1.7E-139;3.9E-138;6.1E-111;1.9E-110;3.5E-110	alpha/beta fold hydrolase [Cognaticolwellia aestuarii]	1.2e-173	255	255	1	255	98.82
MGYP000498025770	hypothetical protein	355	6.4E-258;1.4E-181;2.1E-48;3.3E-48;8.1E-42;2.5E-41;7.8E-41;1.3E-40;1.5E-40;1.7E-40;3.0E-40;7.3E-40;1.2E-39;1.2E-39;8.7E-39;2.1E-38;2.7E-38;5.9E-38;1.1E-37;1.5E-37	hypothetical protein [uncultured Dokdonia sp.]	6.4e-258	355	355	1	355	100
MGYP000498242386	alpha/beta hydrolase	271	6.8E-56;1.2E-51;1.3E-48;3.7E-48;1.2E-46;9.9E-46;2.2E-44;1.9E-43;4.7E-42;8.4E-42;3.5E-41;2.9E-40;1.7E-39;2.6E-39;4.9E-39;1.4E-38;9.7E-38;1.3E-37;2.0E-37;2.4E-36	alpha/beta hydrolase [Streptomyces sp. SN-593]	6.8e-56	272	269	3	265	56.13
MGYP000499760924	lipase family protein	309	9.1E-79;1.3E-75;2.0E-72;1.5E-65;8.2E-65;1.0E-64;3.3E-64;1.4E-61;8.1E-61;3.1E-60;3.2E-60;3.2E-60;1.8E-59;2.6E-59;1.6E-50;2.6E-47;1.8E-45;2.3E-45;3.1E-40;8.1E-30	lipase family protein [Polyangium sp. 15x6]	9.1e-79	278	283	25	301	63.25
MGYP000499885223	MULTISPECIES: hypothetical protein	346	3.0E-165;3.6E-113;8.1E-112;6.1E-110;4.3E-92;1.7E-86;3.9E-59;1.6E-58;2.7E-58;6.1E-58;7.9E-57;3.6E-56;4.7E-55;4.7E-54;9.0E-54;6.0E-53;9.8E-53;1.2E-51;5.9E-51;7.7E-51	MULTISPECIES: hypothetical protein [unclassified Gordonia (in: high G+C Gram-positive bacteria)]	3e-165	224	224	123	346	100
MGYP000500029325	alpha beta hydrolase fold protein, partial	316	4.9E-29;1.6E-17;1.2E-16;2.1E-16	alpha beta hydrolase fold protein, partial [Nannochloropsis gaditana CCMP526]	4.9e-29	232	206	14	210	57.28
MGYP000503754604	lipase	253	2.0E-100;6.0E-100;1.4E-97;5.5E-97;3.8E-96;6.8E-95;1.1E-94;7.1E-93;5.9E-92;2.4E-90;2.8E-90;2.9E-90;4.7E-89;4.7E-89;5.4E-89;1.4E-88;1.1E-87;2.2E-87;3.1E-87;8.9E-87	lipase [Actinokineospora sp. NBRC 105648]	2e-100	246	229	7	234	79.48
MGYP000506822736	alpha/beta hydrolase	259	2.1E-68;5.2E-67;2.2E-66;6.8E-50;2.7E-49;7.8E-49;6.4E-47;4.4E-45;1.6E-44;8.8E-44;9.0E-44;1.3E-43;2.5E-43;2.5E-43;3.0E-43;5.1E-43;5.4E-43;1.4E-42;1.4E-42;2.3E-42	alpha/beta hydrolase [Chloroflexus sp.]	2.1e-68	263	259	1	257	62.55
MGYP000506877117	alpha/beta hydrolase	265	4.8E-112;8.2E-112;1.4E-111;3.9E-111;1.5E-106;7.8E-95;1.1E-94;1.8E-94;2.0E-94;1.1E-90;5.9E-89;4.0E-88;5.6E-88;5.6E-88;7.8E-88;4.8E-87;6.3E-87;2.1E-85;4.2E-84;5.5E-84	alpha/beta hydrolase [Phaeodactylibacter xiamenensis]	4.8e-112	279	256	1	256	80.47
MGYP000508544784	triacylglycerol lipase	318	1.7E-170;6.3E-157;2.6E-156;1.0E-155;4.2E-155;3.8E-147;5.1E-145;2.1E-141;1.6E-140;1.0E-139;2.0E-139;5.7E-139;1.6E-138;1.6E-138;1.0E-136;1.1E-136;1.6E-136;1.1E-135;1.8E-135;5.1E-135	triacylglycerol lipase [Alkalimarinus alittae]	1.7e-170	318	309	10	318	88.35
MGYP000508777140	alpha/beta hydrolase	255	1.1E-62;3.8E-52;4.7E-50;9.7E-50;1.9E-49;7.5E-49;1.0E-48;1.5E-48;2.1E-48;5.8E-48;5.9E-48;5.9E-48;8.4E-48;1.1E-47;1.2E-47;1.2E-47;1.2E-47;1.2E-47;1.2E-47;1.2E-47	alpha/beta hydrolase [Candidatus Nucleicultrix amoebiphila]	1.1e-62	255	249	3	250	62.25
MGYP000509369255	lipase family protein	314	7.2E-65;1.4E-64;2.5E-62;3.5E-62;7.4E-62;1.4E-61;2.8E-61;2.6E-60;4.5E-60;7.4E-60;1.8E-59;8.2E-59;8.2E-57;1.2E-56;3.1E-56;5.3E-51;1.1E-50;4.1E-50;2.3E-49;2.5E-46	lipase family protein [Vibrio parahaemolyticus]	7.2e-65	309	315	1	310	58.1
MGYP000509865903	alpha/beta hydrolase	205	2.3E-115;4.5E-115;2.0E-110;2.4E-110;2.8E-110;7.0E-110;2.9E-103;5.7E-82;1.8E-81;1.2E-80;3.8E-79;1.1E-78;3.0E-78;3.1E-78;1.3E-77;2.2E-77;3.1E-77;7.1E-77;9.7E-77;1.5E-76	alpha/beta hydrolase [Desulfosarcina widdelii]	2.3e-115	649	205	1	205	90.73
MGYP000509970082	alpha/beta fold hydrolase	312	9.3E-93;6.7E-28;1.1E-23;2.1E-23;6.9E-21;1.8E-20;1.8E-20;2.7E-20;1.3E-19;2.4E-19;6.4E-19;9.0E-19;1.2E-18;1.2E-18;1.7E-18;4.5E-18;5.6E-17;7.1E-16	alpha/beta fold hydrolase [Spongiibacter thalassae]	9.3e-93	249	236	76	311	70.76
MGYP000511475454	lipase family protein	247	1.6E-79;3.4E-75;7.1E-75;7.1E-73;1.0E-71;1.6E-38;6.8E-37;1.5E-35;2.9E-35;4.1E-35;4.6E-35;1.1E-34;1.1E-34;1.6E-34;1.6E-34;1.6E-34;3.0E-34;4.4E-34;4.4E-34;8.7E-34	lipase family protein [Thiohalophilus thiocyanatoxydans]	1.6e-79	304	210	4	213	75.71
MGYP000512574455	alpha/beta fold hydrolase	185	8.2E-43;4.4E-39;4.7E-39;8.4E-39;2.5E-38;3.4E-37;7.8E-37;8.2E-37;8.5E-37;1.9E-36;4.4E-36;4.8E-36;5.9E-36;8.7E-36;1.3E-35;1.3E-35;2.0E-35;2.0E-35;4.0E-35;5.0E-35	alpha/beta fold hydrolase [Nocardioides scoriae]	8.2e-43	413	174	13	185	63.22
MGYP000514642772	lipase family protein	229	2.9E-18;1.1E-17;2.8E-17;4.1E-17;3.5E-16;3.6E-16;4.2E-16;6.5E-16;7.5E-16;7.6E-16;8.0E-16	lipase family protein [Tetrahymena thermophila SB210]	2.9e-18	288	168	7	169	50.6
MGYP000514643561	alpha/beta hydrolase	307	6.0E-58;6.0E-58;3.4E-54;5.8E-54;5.8E-54;1.6E-53;3.7E-53;4.8E-53;6.8E-53;7.4E-53;1.1E-51;1.2E-51;1.5E-51;1.2E-50;4.8E-50;9.5E-50;9.9E-50;1.3E-49;1.3E-49;1.3E-49	alpha/beta hydrolase [Legionella jamestowniensis]	6e-58	283	249	13	259	59.84
MGYP000515255710	alpha/beta fold hydrolase	199	9.1E-53;9.6E-25;1.1E-24;3.0E-24;4.8E-24;8.1E-24;8.1E-24;1.4E-23;1.7E-23;1.7E-23;2.4E-23;2.5E-23;3.0E-23;3.4E-23;4.7E-23;6.4E-23;1.1E-22;1.8E-22;1.8E-22;3.1E-22	alpha/beta fold hydrolase [Thermaurantimonas aggregans]	9.1e-53	433	164	29	191	70.73
MGYP000515271828	alpha/beta hydrolase	258	2.6E-150;9.3E-136;1.3E-135;1.3E-135;1.9E-135;1.1E-134;2.2E-134;6.3E-134;1.3E-133;2.5E-133;5.1E-133;5.1E-133;7.3E-133;1.0E-132;1.0E-132;1.7E-132;2.5E-132;3.5E-132;4.2E-132;5.0E-132	alpha/beta hydrolase [Salinibacter sp. 10B]	2.6e-150	262	257	1	257	89.11
MGYP000515519758	lipase family protein	252	1.2E-133;1.4E-132;1.6E-131;1.9E-130;1.5E-127;1.4E-125;4.0E-125;5.7E-125;5.9E-125;2.4E-124;2.7E-123;1.3E-121;1.8E-121;1.5E-120;9.8E-119;1.1E-117;4.6E-117;6.9E-115;4.7E-112;1.9E-111	lipase family protein [Mycobacterium branderi]	1.2e-133	253	251	1	250	85.66
MGYP000517495909	lipase family protein	157	2.3E-53;3.8E-46;1.4E-35;1.8E-35;1.9E-35;3.9E-35;9.9E-35;1.1E-34;1.5E-34;3.0E-29;2.3E-27;1.0E-16;3.8E-16;3.8E-16;7.3E-16;7.3E-16	lipase family protein [Paracidobacterium acidisoli]	2.3e-53	290	158	1	157	69.62
MGYP000517695055	alpha/beta hydrolase	254	5.9E-185;8.4E-185;1.7E-184;3.4E-184;4.8E-184;4.8E-184;9.8E-184;1.4E-183;8.0E-183;2.1E-171;2.9E-169;4.1E-169;5.8E-169;5.8E-169;8.2E-169;1.3E-165;1.3E-165;2.2E-164;6.2E-164;2.5E-163	alpha/beta hydrolase [Anoxybacillus ayderensis]	5.9e-185	254	254	1	254	99.61
MGYP000518502274	alpha/beta hydrolase	306	8.5E-59;1.9E-57;2.1E-56;2.6E-56;2.3E-55;3.3E-55;5.1E-54;5.5E-54;9.9E-54;1.0E-53;1.5E-53;5.2E-53;5.7E-53;1.1E-52;1.4E-52;1.6E-52;1.8E-52;2.6E-52;2.6E-52;3.3E-52	alpha/beta hydrolase [Mangrovimonas sp. ST2L15]	8.5e-59	300	310	1	305	58.06
MGYP000518905856	lipase family protein	268	9.2E-91;3.7E-90;2.1E-89;1.7E-85;6.0E-76;3.8E-74;4.6E-74;1.9E-73;4.4E-71;6.9E-71;1.4E-69;2.8E-67;1.8E-66;6.6E-66;2.1E-65;2.3E-65;3.2E-64;1.9E-63;4.9E-63;4.9E-63	lipase family protein [Cuspidothrix issatschenkoi]	9.2e-91	267	259	6	263	68.34
MGYP000520336548	lipase family protein	272	8.1E-86;4.6E-85;9.3E-85;1.3E-84;1.1E-83;6.7E-73;7.4E-73;1.2E-71;2.3E-69;1.7E-68;6.6E-64;9.9E-63;1.4E-62;5.6E-62;7.1E-62;7.9E-62;7.9E-62;1.6E-61;2.3E-61;2.3E-61	lipase family protein [Hahella chejuensis]	8.1e-86	269	273	1	272	65.2
MGYP000520436496	alpha/beta hydrolase	402	3.8E-112;3.4E-107;9.5E-107;9.5E-107;1.1E-106;2.2E-106;2.8E-106;5.4E-106;8.7E-105;8.7E-105;4.3E-104;2.0E-100;7.4E-93;4.6E-88;2.0E-87;3.4E-86;1.4E-85;4.6E-85;2.6E-84;2.9E-84	alpha/beta hydrolase [Polyangium aurulentum]	3.8e-112	394	381	5	384	67.72
MGYP000521174567	alpha/beta fold hydrolase	245	1.9E-70;4.4E-69;3.9E-65;3.9E-65;3.8E-52;1.2E-50;2.8E-50;6.8E-50;1.0E-49;2.3E-49;2.8E-49;3.2E-49;3.2E-49;6.4E-49;1.1E-48;1.3E-48;1.4E-48;1.8E-48;3.3E-48;3.6E-48	alpha/beta fold hydrolase [Sorangium cellulosum]	1.9e-70	197	191	57	245	76.44
MGYP000521454359	alpha/beta hydrolase	274	5.2E-75;8.5E-67;3.8E-39;4.4E-39;1.1E-38;1.2E-37;1.2E-37;2.9E-37;8.7E-37;2.3E-36;6.3E-36;2.4E-35;3.5E-35;5.2E-35;5.6E-35;1.2E-34;1.2E-34;1.9E-34;2.2E-34;2.5E-34	alpha/beta hydrolase [Fluviicoccus sp.]	5.2e-75	282	268	11	272	66.42
MGYP000523385474	3-oxoadipate enol-lactonase	225	2.7E-74;3.0E-74;2.4E-73;4.9E-73;1.9E-72;1.5E-71;2.8E-71;3.7E-71;4.2E-71;5.6E-71;8.4E-71;1.4E-70;2.6E-70;2.6E-70;3.5E-70;6.0E-70;6.6E-70;6.8E-70;6.8E-70;8.5E-70	3-oxoadipate enol-lactonase [Micromonospora pattaloongensis]	2.7e-74	258	225	1	225	67.56
MGYP000524515598	alpha/beta fold hydrolase	254	2.9E-128;1.1E-96;1.2E-94;4.3E-94;4.3E-94;4.9E-94;6.1E-94;1.4E-93;2.1E-93;2.1E-93;2.4E-93;7.1E-93;2.8E-92;6.8E-92;8.7E-92;9.7E-92;1.5E-91;2.8E-91;4.1E-91;4.6E-91	alpha/beta fold hydrolase [Minwuia thermotolerans]	2.9e-128	255	252	1	252	85.71
MGYP000524516904	DUF3530 family protein	336	1.8E-79;1.3E-50;1.6E-44;2.0E-43;4.3E-42;3.7E-41;2.1E-39;4.4E-38;5.0E-38;1.5E-36;4.5E-35;1.3E-34;4.3E-33;2.5E-30;2.7E-30;5.0E-30;6.6E-30;9.6E-30;9.6E-29;4.9E-28	DUF3530 family protein [Marinobacterium arenosum]	1.8e-79	375	320	41	327	62.19
MGYP000526162515	alpha/beta fold hydrolase	288	5.0E-194;2.3E-99;1.6E-96;3.7E-95;9.9E-89;9.2E-87;1.8E-86;1.2E-83;1.6E-81;1.6E-81;9.5E-81;8.9E-76;7.0E-75;8.2E-74;1.1E-73;9.3E-73;3.5E-67;4.6E-67;5.2E-66;3.1E-64	alpha/beta fold hydrolase [Geoalkalibacter subterraneus]	5e-194	288	288	1	288	97.57
MGYP000526162781	alpha/beta fold hydrolase	209	7.7E-81;2.3E-80;2.5E-46;3.1E-46;1.1E-45;2.2E-45;3.0E-45;8.5E-45;3.1E-44;3.5E-44;3.4E-43;3.7E-43;6.7E-43;1.7E-42;2.3E-42;4.5E-42;9.0E-42;1.2E-41;2.0E-41;1.4E-40	alpha/beta fold hydrolase [Desulfurivibrio alkaliphilus]	7.7e-81	243	209	3	209	71.77
MGYP000526251179	alpha/beta hydrolase	277	1.1E-157;3.2E-157;3.8E-156;1.1E-155;2.3E-108;5.3E-107;1.6E-101;7.3E-100;1.1E-99;1.1E-99;1.5E-99;4.3E-99;3.5E-98;3.7E-95;5.2E-95;5.2E-95;1.5E-94;1.5E-94;3.0E-94;4.2E-94	alpha/beta hydrolase [Herpetosiphon sp.]	1.1e-157	277	277	1	277	89.17
MGYP000526467459	lipase family protein	293	4.6E-213;3.4E-26;6.9E-25;7.5E-25;1.8E-24;2.0E-24;4.0E-24;4.0E-24;1.1E-23;1.5E-21;1.6E-21;2.7E-21;3.8E-21;5.2E-21;5.3E-21;7.4E-21;1.1E-19;1.1E-19;8.1E-19;5.7E-18	lipase family protein [Casimicrobium huifangae]	4.6e-213	293	293	1	293	97.27
MGYP000526934958	alpha/beta hydrolase	272	1.6E-150;4.5E-150;2.6E-149;7.5E-149;5.2E-114;7.2E-100;5.2E-95;6.9E-93;4.1E-89;5.8E-89;7.5E-87;1.1E-86;7.2E-85;5.1E-83;6.9E-83;4.0E-82;1.1E-81;6.2E-81;8.9E-81;1.2E-80	alpha/beta hydrolase [Acholeplasma laidlawii]	1.6e-150	272	272	1	272	87.5
MGYP000527893187	alpha/beta hydrolase	274	3.1E-181;5.7E-108;6.4E-107;8.9E-105;8.9E-105;4.9E-97;7.0E-97;1.3E-96;1.4E-96;1.4E-96;2.0E-96;2.8E-96;2.8E-96;2.8E-96;5.1E-96;5.7E-96;5.7E-96;7.3E-96;7.8E-96;8.1E-96	alpha/beta hydrolase [Lachnotalea sp. AF33-28]	3.1e-181	255	255	20	274	100
MGYP000529377406	alpha/beta hydrolase	184	3.8E-87;3.6E-85;5.1E-85;1.6E-84;2.8E-84;3.5E-84;4.5E-83;8.6E-83;4.3E-82;5.5E-82;8.0E-82;2.3E-81;4.3E-81;5.3E-81;1.3E-80;1.6E-80;2.5E-80;7.9E-80;1.7E-79;1.9E-79	alpha/beta hydrolase [Limnohabitans sp.]	3.8e-87	183	184	1	184	77.72
MGYP000532192091	triacylglycerol lipase	274	2.3E-26;1.2E-25;1.3E-24;2.1E-24;2.5E-24;3.2E-24;3.5E-24;8.0E-24;1.8E-23;5.5E-22;1.1E-21;1.3E-21;1.5E-21;4.2E-21;4.2E-21;5.6E-21;5.9E-21;5.9E-21;1.1E-20;1.1E-20	triacylglycerol lipase [Alloalcanivorax gelatiniphagus]	2.3e-26	281	191	84	270	56.54
MGYP000532219601	lipase family protein	188	5.7E-57;2.0E-28;5.7E-28;1.5E-27;1.9E-27;9.8E-27;9.8E-27;1.6E-26;1.7E-26;1.9E-26;1.9E-26;3.3E-26;3.8E-26;4.6E-26;4.6E-26;4.7E-26;7.5E-26;1.3E-25;1.5E-25;3.6E-25	lipase family protein [Edaphobacter aggregans]	5.7e-57	299	182	1	182	67.58
MGYP000532823138	lipase ZK262.3-like	389	1.8E-203;4.9E-179;2.3E-178;9.2E-174;6.7E-164;1.1E-162;1.4E-161;7.1E-161;8.1E-160;9.2E-158;1.3E-157;4.8E-154;9.2E-151;1.0E-149;5.9E-149;1.3E-141;5.1E-133;4.5E-127;6.8E-122;3.3E-100	lipase ZK262.3-like [Orbicella faveolata]	1.8e-203	379	356	31	385	85.67
MGYP000532877299	alpha/beta hydrolase	196	4.9E-30;1.8E-25;1.8E-25;4.0E-22;4.4E-20;2.6E-17;1.8E-16	alpha/beta hydrolase [Ilumatobacter coccineus]	4.9e-30	259	192	7	196	53.65
MGYP000532961274	lipase family protein	322	1.2E-41;6.8E-41;1.5E-40;6.9E-34;7.7E-22	lipase family protein [Kovacikia minuta]	1.2e-41	298	310	13	318	50
MGYP000533239293	3-oxoadipate enol-lactonase	283	2.3E-114;4.0E-113;5.8E-110;6.2E-108;3.0E-103;5.9E-100;2.8E-99;1.4E-98;5.6E-98;7.0E-98;1.3E-97;6.4E-97;7.1E-97;2.1E-96;2.1E-96;4.2E-96;4.2E-96;5.2E-96;6.2E-96;6.2E-96	3-oxoadipate enol-lactonase [Actinophytocola sp.]	2.3e-114	256	249	32	280	78.71
MGYP000533461251	alpha/beta fold hydrolase	236	2.1E-76;4.4E-40;1.7E-39;6.9E-39;3.3E-36;5.2E-35;1.0E-34;2.5E-34;2.9E-34;3.0E-34;5.9E-31;9.7E-31;2.7E-30;7.7E-29;8.1E-28;1.8E-27;1.2E-26;1.7E-26;1.8E-26;1.8E-26	alpha/beta fold hydrolase [Desulfatiglans anilini]	2.1e-76	269	236	1	236	65.68
MGYP000533659262	alpha/beta hydrolase	265	1.7E-110;5.9E-109;1.1E-102;1.3E-90;1.1E-89;1.4E-89;1.7E-89;1.7E-89;2.4E-89;9.6E-89;1.7E-88;3.6E-86;1.2E-84;7.0E-84;7.3E-81;1.5E-80;6.8E-79;1.5E-78;1.7E-77;9.8E-77	alpha/beta hydrolase [Leucothrix mucor]	1.7e-110	260	259	1	259	75.29
MGYP000533689238	lipase family protein	351	1.1E-170;6.5E-106;3.1E-76;5.1E-72;1.9E-65;7.6E-65;6.6E-64;5.2E-63;2.6E-61;1.1E-59;5.3E-58;1.0E-54;3.9E-54;1.8E-50;6.5E-50;2.4E-49;2.8E-49;1.5E-47;5.4E-45;2.7E-43	lipase family protein [Maioricimonas rarisocia]	1.1e-170	308	304	46	349	87.83
MGYP000535102511	alpha/beta fold hydrolase	476	3.5E-292;1.2E-289;1.6E-259;2.3E-259;4.0E-259;6.8E-259;7.1E-258;1.0E-257;1.5E-256;3.6E-256;5.7E-253;2.4E-252;5.9E-243;9.4E-242;7.2E-241;9.1E-235;2.8E-234;1.3E-206;5.9E-205;1.6E-202	alpha/beta fold hydrolase [Reyranella sp.]	3.5e-292	461	464	17	476	91.81
MGYP000535171661	lipase family protein	178	2.8e-30	lipase family protein [Bradyrhizobium japonicum]	2.8e-30	218	182	3	178	52.2
MGYP000536306985	uncharacterized protein J4E82_000530	176	2.7E-20;9.0E-20;1.6E-19;1.9E-19;2.0E-19;2.0E-19;2.2E-19;2.8E-19;3.8E-19;3.8E-19;4.4E-19;4.6E-19;5.5E-19;9.4E-19;9.7E-19;1.0E-18;1.3E-18;1.8E-18;2.1E-18;2.7E-18	uncharacterized protein J4E82_000530 [Alternaria postmessia]	2.7e-20	318	139	39	170	52.52
MGYP000538589868	alpha/beta hydrolase	254	8.4E-185;2.4E-184;2.0E-183;2.0E-183;2.8E-183;4.0E-183;1.1E-182;1.1E-182;1.6E-182;2.3E-182;3.3E-182;4.6E-182;4.6E-182;6.6E-182;6.6E-182;9.4E-182;1.3E-181;1.3E-181;1.3E-181;1.9E-181	alpha/beta hydrolase [Plesiomonas shigelloides]	8.4e-185	254	254	1	254	100
MGYP000539466709	uncharacterized protein MJAP1_000004	210	5.7E-123;6.4E-78;8.4E-55;1.2E-54;1.3E-54;4.2E-54;5.3E-54;2.2E-53;3.8E-51;7.0E-51;5.0E-49;6.7E-49;2.1E-47;2.3E-46;1.4E-45;8.3E-44;5.6E-43;1.3E-38;1.4E-38;2.5E-34	uncharacterized protein MJAP1_000004 [Malassezia japonica]	5.7e-123	262	178	33	210	99.44
MGYP000541078835	lipase family protein	279	6.2E-68;7.0E-67;9.9E-67;2.8E-66;9.9E-64;1.4E-63;2.8E-63;5.4E-63;7.9E-63;1.1E-62;1.6E-62;2.2E-62;4.3E-62;4.3E-62;8.6E-62;1.1E-61;1.4E-61;1.7E-61;4.9E-61;6.9E-61	lipase family protein [Mycobacterium sp. IS-2888]	6.2e-68	275	274	9	271	60.95
MGYP000541209935	alpha/beta fold hydrolase	194	3.4E-60;4.8E-60;2.1E-56;3.4E-55;2.6E-42;7.6E-42;2.5E-41;2.8E-41;6.0E-41;1.6E-40;2.1E-40;4.6E-40;4.8E-40;1.2E-39;1.2E-39;1.6E-39;3.2E-39;6.5E-39;9.4E-39;1.3E-38	alpha/beta fold hydrolase [Rhodoluna lacicola]	3.4e-60	196	194	5	194	68.04
MGYP000541719154	hypothetical protein	340	4.0E-109;4.9E-90;1.5E-52;1.3E-50;7.5E-49;1.1E-48;5.9E-48;8.2E-48;1.2E-47;1.7E-47;1.8E-46;9.7E-46;2.3E-45;4.1E-45;6.4E-45;2.1E-44;2.3E-44;2.5E-44;2.9E-44;4.6E-44	hypothetical protein [Baekduia alba]	4e-109	333	296	44	339	70.61
MGYP000541790733	alpha/beta hydrolase	237	6.2E-42;1.1E-39;2.3E-39;4.9E-39;8.7E-39;1.9E-38;2.0E-38;2.1E-38;3.8E-38;7.2E-38;9.0E-38;1.4E-37;2.6E-37;3.2E-37;5.3E-37;5.9E-37;1.1E-36;1.9E-36;1.2E-35;1.6E-35	alpha/beta hydrolase [Hymenobacter wooponensis]	6.2e-42	226	198	43	237	57.58
MGYP000542524601	alpha/beta fold hydrolase	535	6.0E-78;1.0E-75;3.9E-75;3.9E-75;2.6E-74;5.0E-73;4.5E-70;8.9E-70;5.7E-69;6.7E-69;2.2E-68;2.8E-67;3.4E-67;1.2E-66;5.3E-66;9.6E-66;3.1E-64;3.6E-64;4.2E-64;4.2E-64	alpha/beta fold hydrolase [Symbiobacterium thermophilum]	6e-78	545	503	44	525	51.89
MGYP000543904962	alpha/beta hydrolase	234	2.3E-65;4.9E-60;6.9E-60;1.4E-59;3.6E-52;3.7E-52;2.1E-51;3.9E-51;8.3E-51;8.4E-51;9.5E-50;1.3E-49;3.0E-49;7.5E-49;7.9E-49;1.0E-48;1.7E-48;1.7E-48;2.2E-48;2.4E-48	alpha/beta hydrolase [uncultured Desulfobacter sp.]	2.3e-65	237	229	4	231	62.01
MGYP000544935889	PREDICTED: kynurenine formamidase-like isoform X1	297	3.7E-189;1.5E-188;5.8E-186;1.2E-147;1.1E-107;8.7E-107;8.7E-107;1.2E-106;5.5E-105;1.8E-96;1.3E-93;4.6E-92;8.1E-70;2.8E-68;3.2E-68;4.4E-68;8.8E-68;9.2E-68;9.2E-68;9.3E-68	PREDICTED: kynurenine formamidase-like isoform X1 [Acropora digitifera]	3.7e-189	287	286	1	286	94.76
MGYP000545353412	alpha/beta fold hydrolase	196	2.7E-68;8.0E-65;2.7E-44;1.4E-36;2.6E-36;4.0E-36;4.8E-36;5.2E-36;5.9E-36;6.0E-36;6.2E-36;7.3E-36;8.1E-36;8.2E-36;1.1E-35;1.5E-35;1.7E-35;2.9E-35;3.6E-35;4.0E-35	alpha/beta fold hydrolase [Rhabdothermincola sp.]	2.7e-68	300	198	4	196	71.72
MGYP000547646098	hypothetical protein	259	6.9E-91;1.6E-89;6.5E-89;1.3E-88;2.6E-88;2.6E-88;3.7E-88;5.3E-88;5.3E-88;1.1E-87;1.1E-87;1.1E-87;1.1E-87;1.1E-87;2.1E-87;2.1E-87;3.0E-87;3.0E-87;3.0E-87;4.3E-87	hypothetical protein [uncultured Oscillibacter sp.]	6.9e-91	258	259	1	259	67.95
MGYP000547675772	MULTISPECIES: triacylglycerol lipase	320	5.2E-196;4.3E-195;6.9E-187;3.3E-165;1.5E-164;3.7E-152;5.3E-149;7.6E-149;4.4E-147;9.7E-143;8.0E-142;5.4E-138;4.2E-126;2.9E-101;4.1E-101;5.0E-100;4.1E-99;2.3E-98;4.5E-98;6.4E-98	MULTISPECIES: triacylglycerol lipase [unclassified Oleiphilus]	5.2e-196	320	320	1	320	88.75
MGYP000547956310	AcvB/VirJ family lysyl-phosphatidylglycerol hydrolase	483	9.4E-86;7.2E-85;8.3E-84;3.7E-83;8.2E-78;1.7E-77;3.0E-77;5.3E-76;2.0E-75;2.4E-75;1.8E-74;3.9E-73;4.4E-73;1.7E-72;1.8E-72;1.8E-72;2.9E-72;2.9E-72;3.6E-72;3.8E-72	AcvB/VirJ family lysyl-phosphatidylglycerol hydrolase [Geopsychrobacter electrodiphilus]	9.4e-86	476	442	24	458	55.2
MGYP000548160118	lipase family protein	185	1.6E-57;1.9E-56;1.3E-53;2.4E-53;3.2E-53;3.5E-52;3.8E-52;7.7E-52;9.1E-52;1.3E-51;1.9E-51;2.1E-51;3.8E-51;6.1E-51;6.1E-51;1.2E-50;6.0E-50;6.6E-50;9.4E-50;1.3E-49	lipase family protein [Cyanothece sp. BG0011]	1.6e-57	385	172	1	172	74.42
MGYP000549835436	alpha/beta fold hydrolase	284	3.0E-114;2.7E-112;1.4E-110;1.3E-109;1.7E-104;1.8E-104;2.1E-104;7.1E-104;9.0E-104;1.2E-102;2.7E-102;3.3E-101;8.3E-101;8.6E-101;1.1E-100;9.4E-99;1.1E-98;4.6E-98;4.8E-97;5.3E-97	alpha/beta fold hydrolase [Aureispira anguillae]	3e-114	283	282	3	283	71.63
MGYP000549886601	alpha/beta fold hydrolase	237	2.9E-46;5.9E-43;3.2E-42;1.9E-40;4.4E-40;7.9E-40;1.2E-39;4.1E-39;4.4E-39;8.5E-39;9.3E-39;1.2E-38;1.2E-38;1.6E-38;1.6E-38;2.4E-38;3.4E-38;4.5E-38;1.9E-37;2.0E-37	alpha/beta fold hydrolase [Hydrogenothermus marinus]	2.9e-46	253	244	4	234	60.25
MGYP000549902766	MULTISPECIES: alpha/beta hydrolase	288	1.0E-119;1.3E-117;2.6E-88;2.4E-86;7.0E-86;2.9E-85;1.7E-84;2.3E-84;7.0E-84;1.6E-82;2.1E-82;3.3E-81;4.6E-79;9.3E-79;1.9E-78;5.2E-78;8.8E-78;1.0E-77;8.9E-77;1.4E-75	MULTISPECIES: alpha/beta hydrolase [Microthrix]	1e-119	290	258	15	272	81.78
MGYP000549934804	lipase	198	1.3E-65;8.7E-62;1.0E-61;2.0E-61;2.8E-61;1.9E-60;9.9E-60;6.7E-59;7.8E-59;8.0E-59;1.6E-58;2.3E-58;9.9E-58;1.9E-57;1.5E-56;4.3E-56;1.2E-55;5.3E-52;2.2E-48;1.1E-47	lipase [Trinickia violacea]	1.3e-65	194	198	1	197	68.18
MGYP000550576138	alpha/beta hydrolase	299	5.3E-73;7.0E-73;4.1E-72;4.1E-72;7.9E-72;3.3E-71;1.2E-70;1.2E-70;1.4E-70;1.7E-70;1.7E-70;1.7E-70;2.3E-70;3.4E-70;4.8E-70;4.8E-70;4.8E-70;4.9E-70;5.1E-70;6.7E-70	alpha/beta hydrolase [Rhodococcus koreensis]	5.3e-73	302	289	18	299	62.63
MGYP000553360222	lipase family protein	248	8.6E-26;7.7E-21;8.1E-19;1.5E-18;5.4E-18;6.5E-18;1.4E-17;2.3E-16;3.1E-16;4.4E-16	lipase family protein [Methanococcus maripaludis]	8.6e-26	279	276	7	247	52.17
MGYP000554282465	alpha/beta hydrolase	282	3.0E-108;5.4E-89;1.8E-88;2.5E-85;4.8E-85;1.3E-82;1.9E-79;4.1E-78;7.3E-74;1.2E-73;1.5E-73;1.7E-73;3.0E-73;3.3E-73;3.4E-73;4.2E-73;1.1E-71;8.2E-70;5.2E-66;8.2E-64	alpha/beta hydrolase [Oceanococcus atlanticus]	3e-108	291	267	16	282	76.4
MGYP000554303263	alpha/beta hydrolase family protein	269	1.1E-108;5.1E-93;6.4E-93;2.0E-86;1.7E-85;2.9E-82;1.5E-78;9.0E-78;4.4E-77;1.5E-73;3.4E-72;3.1E-71;5.1E-71;7.2E-71;1.4E-70;5.4E-70;6.3E-70;3.6E-69;1.9E-68;5.8E-68	alpha/beta hydrolase family protein [Litorimonas taeanensis]	1.1e-108	275	262	5	266	77.1
MGYP000555732259	esterase/lipase	251	6.2E-40;1.9E-35;5.4E-35;1.2E-34;2.7E-34;1.0E-33;2.9E-33;3.7E-33;1.5E-31;1.6E-31;2.0E-31;2.2E-31;6.0E-31;1.2E-30;3.3E-30;3.3E-30;6.5E-30;9.1E-30;1.7E-29;1.7E-29	esterase/lipase [Ostreococcus lucimarinus virus 1]	6.2e-40	252	232	15	238	55.6
MGYP000555965236	lipase family protein	289	1.4E-51;7.6E-51;1.5E-50;6.0E-50;8.0E-50;1.2E-49;6.3E-49;3.0E-46;1.8E-45;4.3E-45;1.4E-44;3.2E-44;7.9E-44;1.1E-43;1.1E-43;1.8E-43;7.2E-43;1.2E-42;2.4E-42;4.7E-42	lipase family protein [Caballeronia sp. LZ029]	1.4e-51	284	290	4	285	54.48
MGYP000557278386	alpha/beta hydrolase	294	7.1E-103;3.1E-102;1.5E-91;4.9E-86;7.7E-85;8.0E-85;1.6E-84;5.2E-83;6.7E-83;7.7E-82;1.1E-81;1.3E-80;1.8E-80;2.8E-80;3.5E-80;3.5E-80;2.0E-79;1.2E-78;1.2E-78;9.6E-78	alpha/beta hydrolase [Salinirussus salinus]	7.1e-103	292	289	9	294	70.59
MGYP000558676218	lipase family protein	181	1.7E-44;2.4E-44;6.7E-44;9.5E-44;1.5E-43;1.7E-37;6.6E-37;5.5E-36;2.2E-35;3.1E-35;3.1E-35;4.3E-35;6.1E-35;8.6E-35;8.6E-35;8.6E-35;1.7E-34;1.7E-34;1.7E-34;1.9E-34	lipase family protein [Hahella sp. CR1]	1.7e-44	269	172	7	170	68.02
MGYP000558866581	lipase family protein	264	5.1E-108;1.4E-107;4.6E-98;7.3E-88;2.3E-82;1.3E-69;4.4E-69;4.4E-69;6.2E-69;7.3E-69;1.2E-68;5.4E-66;7.2E-65;4.8E-64;3.8E-63;4.7E-62;6.1E-62;2.2E-61;1.2E-58;3.6E-58	lipase family protein [Hoeflea algicola]	5.1e-108	316	260	1	260	74.62
MGYP000559406275	lipase	172	1.3E-117;1.5E-117;1.5E-117;2.1E-117;5.3E-117;8.7E-117;8.7E-117;8.7E-117;8.7E-117;1.1E-116;1.2E-116;1.2E-116;1.2E-116;1.2E-116;1.6E-116;2.2E-116;2.5E-116;3.3E-116;3.5E-116;3.5E-116	lipase [Vibrio harveyi]	1.3e-117	248	172	1	172	96.51
MGYP000559757735	alpha/beta fold hydrolase	238	4.8E-41;2.3E-39;2.4E-39;1.7E-38;8.7E-38;2.2E-37;3.2E-37;7.1E-37;1.3E-36;2.5E-36;3.4E-36;6.9E-36;2.0E-35;5.6E-35;1.6E-34;2.5E-34;3.1E-34;4.8E-33;2.3E-31;3.0E-31	alpha/beta fold hydrolase [Actinoplanes durhamensis]	4.8e-41	224	221	17	233	56.56
MGYP000560234566	alpha/beta hydrolase	242	1.7E-91;6.7E-35;1.5E-34;1.7E-34;1.7E-34;1.8E-34;2.4E-34;5.9E-34;1.8E-24;1.8E-24;3.5E-24;3.5E-24;6.9E-24;6.9E-24;8.0E-24	alpha/beta hydrolase [Pseudobacteroides cellulosolvens]	1.7e-91	245	228	1	228	77.63
MGYP000562438331	alpha/beta fold hydrolase	195	2.6E-77;9.3E-77;4.6E-76;6.6E-76;2.7E-75;3.6E-75;3.6E-75;7.6E-75;1.0E-74;1.1E-74;1.2E-74;1.5E-74;1.6E-74;2.2E-74;2.2E-74;3.0E-74;3.1E-74;3.1E-74;4.2E-74;4.4E-74	alpha/beta fold hydrolase [Mastigocoleus testarum]	2.6e-77	208	190	4	193	75.26
MGYP000562448636	lipase family protein	259	2.7E-26;4.0E-25;6.5E-25;7.2E-25;1.3E-24;6.7E-24;6.7E-24;6.7E-24;6.7E-24;6.7E-24;9.0E-24;9.0E-24;9.0E-24;9.0E-24;1.7E-23;2.7E-22;3.5E-22;4.3E-22;8.4E-22;8.8E-22	lipase family protein [Oscillatoria laete-virens]	2.7e-26	274	249	10	240	51.41
MGYP000562757259	alpha/beta fold hydrolase	268	4.9E-116;3.1E-99;1.9E-96;2.4E-96;3.4E-96;7.3E-96;1.0E-95;1.4E-95;2.1E-95;8.0E-93;2.3E-92;2.9E-91;1.6E-90;4.7E-90;2.5E-85;4.7E-85;2.0E-84;4.5E-83;4.1E-77;4.1E-77	alpha/beta fold hydrolase [Huintestinicola butyrica]	4.9e-116	273	270	1	268	74.81
MGYP000564657329	alpha/beta fold hydrolase	258	2.8E-71;4.7E-71;1.9E-70;1.9E-70;2.7E-70;3.1E-69;2.0E-66;6.5E-66;9.2E-66;1.8E-65;3.5E-65;2.0E-64;1.1E-63;3.2E-63;1.2E-58;1.5E-57;3.4E-54;2.8E-52;1.1E-27;1.8E-27	alpha/beta fold hydrolase [Polyangium jinanense]	2.8e-71	253	244	14	256	63.93
MGYP000565190042	uncharacterized protein BX663DRAFT_505867	171	1.4E-33;1.7E-31;5.4E-30;2.0E-29;6.4E-29;9.3E-29;1.5E-28;1.8E-28;2.4E-28;2.5E-28;6.3E-28;8.7E-28;2.8E-27;3.0E-27;4.1E-27;1.2E-26;1.6E-26;1.2E-25;1.6E-25;7.8E-25	uncharacterized protein BX663DRAFT_505867 [Cokeromyces recurvatus]	1.4e-33	836	167	1	164	61.08
MGYP000566057864	lipase family protein	218	2.6e-21	lipase family protein [Belliella alkalica]	2.6e-21	345	205	12	210	50.24
MGYP000566120055	lipase family protein	192	2.8E-42;2.4E-38;1.3E-37;3.0E-37;4.2E-37;6.0E-37;1.6E-36;2.2E-36;2.2E-36;3.6E-36;4.2E-36;4.3E-36;5.6E-36;8.5E-36;8.9E-36;1.4E-35;2.2E-35;2.2E-35;2.2E-35;5.7E-35	lipase family protein [Stenomitos frigidus]	2.8e-42	252	203	7	188	56.65
MGYP000568327819	alpha/beta fold hydrolase	255	9.0E-144;5.8E-140;1.2E-139;1.6E-139;2.4E-139;2.4E-139;4.7E-139;6.7E-139;1.9E-138;4.1E-123;6.8E-122;5.5E-119;3.1E-118;9.3E-118;2.1E-117;2.7E-117;7.4E-117;7.6E-117;3.1E-116;4.6E-116	alpha/beta fold hydrolase [Colwellia sp. Bg11-12]	9e-144	255	253	1	253	88.54
MGYP000568953680	alpha/beta hydrolase	296	6.6E-105;6.1E-96;6.9E-96;2.3E-87;3.0E-86;2.4E-85;1.0E-83;1.4E-81;3.9E-81;3.2E-80;1.7E-73;1.1E-70;2.8E-70;4.4E-70;1.4E-69;2.3E-69;1.3E-68;1.8E-68;3.8E-68;1.3E-67	alpha/beta hydrolase [Sulfurifustis variabilis]	6.6e-105	296	279	11	289	68.82
MGYP000569030882	alpha/beta fold hydrolase	213	1.6E-58;8.3E-58;1.5E-56;3.0E-56;3.6E-56;1.2E-55;2.4E-55;4.3E-55;4.7E-55;5.4E-55;1.6E-54;3.1E-54;1.8E-53;3.1E-53;7.2E-53;9.9E-53;1.4E-52;3.3E-52;5.1E-52;5.8E-52	alpha/beta fold hydrolase [Halomonas maura]	1.6e-58	265	190	23	212	65.79
MGYP000569038671	alpha/beta hydrolase fold domain-containing protein	293	8.2E-78;1.1E-72;6.5E-71;1.1E-70;2.1E-70;1.3E-69;2.9E-68;7.6E-67;1.6E-66;3.0E-65;1.8E-64;1.5E-63;1.1E-60;1.3E-59;4.0E-58;5.3E-57;5.1E-55;1.1E-46;2.1E-46;9.7E-45	alpha/beta hydrolase fold domain-containing protein [Phenylobacterium sp.]	8.2e-78	288	287	1	286	61.67
MGYP000571704045	hypothetical protein	447	5.1E-59;2.5E-58;1.1E-56;1.9E-55;1.1E-52;1.8E-52;2.0E-52;2.1E-52;2.7E-52;5.4E-52;1.6E-51;2.1E-51;4.3E-51;2.2E-50;4.3E-50;1.0E-49;6.0E-49;3.4E-43;9.9E-41;2.8E-40	hypothetical protein [Nannocystis sp.]	5.1e-59	490	393	62	442	51.4
MGYP000571753355	alpha/beta hydrolase	261	3.5E-154;1.4E-153;1.4E-153;1.3E-149;3.9E-130;5.4E-130;2.8E-123;1.5E-122;2.8E-119;4.4E-117;8.9E-117;3.4E-116;1.6E-111;4.7E-107;4.8E-107;1.7E-105;1.5E-102;3.6E-101;3.6E-101;8.6E-101	alpha/beta hydrolase [Neolewinella persica]	3.5e-154	274	258	1	258	87.98
MGYP000573408207	alpha/beta hydrolase	262	2.3E-177;8.9E-177;1.1E-175;2.5E-75;6.8E-74;6.1E-68;1.7E-67;1.7E-67;2.4E-67;3.5E-67;2.6E-66;2.8E-66;3.2E-66;4.0E-66;4.6E-66;7.9E-66;7.9E-66;7.9E-66;1.3E-65;1.8E-65	alpha/beta hydrolase [Prolixibacter denitrificans]	2.3e-177	262	262	1	262	98.09
MGYP000573430535	alpha/beta fold hydrolase	225	9.0E-68;1.9E-64;1.3E-62;3.6E-62;4.4E-62;1.0E-61;3.1E-61;3.4E-61;4.9E-60;7.1E-60;3.3E-59;4.6E-59;5.9E-59;7.4E-59;9.0E-59;1.2E-58;1.2E-58;1.4E-58;1.5E-58;1.7E-58	alpha/beta fold hydrolase [Aquimarina litoralis]	9e-68	226	221	2	222	71.95
MGYP000573497487	alpha/beta fold hydrolase	266	2.9E-87;1.6E-65;2.2E-60;2.3E-60;4.4E-60;3.0E-59;8.9E-57;9.1E-57;1.5E-56;7.1E-56;1.5E-55;4.1E-55;7.0E-55;1.0E-54;2.2E-54;3.2E-54;3.5E-54;9.0E-54;7.1E-53;1.4E-52	alpha/beta fold hydrolase [Pyrinomonas methylaliphatogenes]	2.9e-87	281	263	1	263	69.2
MGYP000573532576	alpha/beta hydrolase	236	3.3E-65;6.1E-60;3.9E-58;2.8E-52;8.8E-52;2.1E-48;5.3E-46;6.0E-45;1.7E-44;9.9E-43;1.6E-42;2.5E-41;4.4E-37;3.2E-35;1.1E-34;1.8E-34;2.5E-34;4.0E-34;4.9E-34;2.1E-33	alpha/beta hydrolase [Actinomarinicola tropica]	3.3e-65	268	242	1	232	64.05
MGYP000574173109	hypothetical protein	445	1.8E-110;1.7E-86;8.3E-25;1.5E-24;2.8E-24;9.9E-22;1.0E-20	hypothetical protein [Vicingus serpentipes]	1.8e-110	414	412	36	445	63.35
MGYP000574507128	alpha/beta hydrolase	258	3.3E-94;5.7E-78;5.4E-76;1.7E-74;2.8E-74;5.9E-74;3.1E-73;1.1E-72;2.5E-72;1.8E-71;2.7E-71;1.0E-70;1.1E-70;1.5E-70;8.4E-70;1.2E-69;3.4E-69;3.4E-69;4.5E-69;4.8E-69	alpha/beta hydrolase [Ilumatobacter nonamiensis]	3.3e-94	260	259	1	258	66.8
MGYP000576444033	alpha/beta fold hydrolase	215	7.6E-41;8.3E-41;1.7E-40;3.3E-40;4.7E-39;2.2E-38;2.1E-37;4.0E-37;1.1E-36;2.4E-36;4.0E-36;1.0E-35;3.5E-35;7.8E-35;4.5E-32;1.8E-31;4.5E-31;1.5E-28;5.2E-25;3.5E-24	alpha/beta fold hydrolase [Allokutzneria sp. NRRL B-24872]	7.6e-41	218	192	26	214	57.29
MGYP000576695523	lipase family protein	321	4.8E-182;2.6E-178;5.2E-178;5.8E-123;6.8E-119;1.0E-118;6.4E-108;7.7E-108;9.0E-108;1.4E-105;1.5E-105;1.9E-105;2.1E-105;4.7E-105;6.8E-105;1.0E-104;1.2E-104;1.2E-104;3.8E-104;4.0E-104	lipase family protein [uncultured Cocleimonas sp.]	4.8e-182	287	282	27	308	92.55
MGYP000577112179	alpha/beta hydrolase	462	2.0E-159;2.9E-158;7.7E-158;5.8E-157;1.1E-156;4.5E-155;5.8E-155;8.2E-155;2.4E-154;3.3E-154;6.0E-153;1.1E-152;2.5E-151;1.0E-150;3.8E-150;3.1E-149;1.2E-148;2.2E-148;2.5E-148;3.5E-148	alpha/beta hydrolase [Actinomadura craniellae]	2e-159	430	412	49	460	71.36
MGYP000577191876	alpha/beta fold hydrolase	218	4.8E-19;7.8E-18;2.5E-17;2.8E-17;4.8E-17;5.3E-17;5.5E-17;9.2E-17;9.2E-17;1.8E-16;1.8E-16;2.2E-16;2.8E-16;2.8E-16;2.9E-16;2.9E-16;4.1E-16;4.7E-16;5.4E-16;5.4E-16	alpha/beta fold hydrolase [Streptomyces sp. A1136]	4.8e-19	276	206	13	212	50.97
MGYP000577193800	alpha/beta fold hydrolase	189	3.7E-24;1.2E-23;1.7E-22;1.0E-21;1.0E-21;1.1E-21;1.3E-21;1.4E-21;1.7E-21;1.7E-21;2.2E-21;2.2E-21;2.3E-21;2.3E-21;2.4E-21;2.4E-21;2.4E-21;2.5E-21;3.1E-21;3.9E-21	alpha/beta fold hydrolase [Niveibacterium sp. 24ML]	3.7e-24	300	176	18	188	56.25
MGYP000577384734	lipase ZK262.3-like	402	1.0E-225;3.5E-223;6.9E-223;4.4E-222;8.5E-218;2.1E-210;3.9E-210;2.3E-209;9.3E-172;1.1E-171;2.9E-171;5.0E-162;2.4E-157;1.8E-156;3.9E-156;1.6E-154;1.6E-154;3.7E-147;1.8E-146;1.7E-138	lipase ZK262.3-like [Acropora millepora]	1e-225	421	348	1	347	91.09
MGYP000577873956	alpha/beta hydrolase	305	1.2E-176;8.9E-170;1.8E-169;3.0E-168;3.0E-168;3.0E-168;4.2E-168;2.4E-167;1.0E-157;1.4E-117;4.7E-117;5.1E-117;1.7E-116;2.2E-116;2.7E-116;2.7E-116;5.4E-116;1.1E-115;1.7E-115;9.6E-115	alpha/beta hydrolase [Citromicrobium sp. JLT1363]	1.2e-176	317	304	1	304	90.13
MGYP000578886422	alpha/beta hydrolase	301	1.8E-223;5.2E-223;7.4E-223;7.4E-223;1.0E-222;1.0E-222;1.0E-222;1.5E-222;6.0E-222;6.0E-222;6.0E-222;8.6E-222;8.6E-222;8.6E-222;1.2E-221;1.2E-221;1.7E-221;5.0E-221;5.0E-221;5.0E-221	alpha/beta hydrolase [Bariatricus massiliensis]	1.8e-223	301	300	1	300	99.67
MGYP000579543849	lipase family protein	314	1.5E-153;1.4E-144;3.7E-142;8.7E-141;1.6E-129;5.9E-128;1.4E-126;5.7E-126;6.8E-126;1.9E-125;7.4E-123;2.1E-122;4.1E-122;3.3E-121;4.9E-121;2.6E-120;2.2E-119;2.3E-119;5.1E-119;1.3E-118	lipase family protein [Terrimonas sp. H1YJ31]	1.5e-153	364	306	1	306	81.37
MGYP000579558792	lipase family protein	297	7.2E-141;3.1E-138;5.6E-138;1.4E-136;1.4E-136;1.7E-133;5.2E-130;9.8E-129;7.0E-73;7.0E-73;2.0E-72;4.0E-72;3.2E-71;6.3E-70;8.9E-65;3.6E-64;4.0E-63;5.7E-63;1.1E-62;1.6E-62	lipase family protein [Nitrosomonas sp. Nm33]	7.2e-141	298	283	1	283	79.51
MGYP000583428421	hypothetical protein	290	1.1E-102;1.7E-101;7.2E-90;8.6E-90;5.2E-88;6.0E-88;1.2E-86;1.6E-86;2.6E-86;4.6E-86;2.6E-85;4.8E-85;9.6E-85;1.5E-84;1.5E-83;1.3E-82;1.9E-82;1.1E-81;1.7E-81;2.0E-81	hypothetical protein [Bauldia litoralis]	1.1e-102	298	274	16	289	70.8
MGYP000583705648	uncharacterized protein MSY001_3017	310	2.3E-192;9.2E-68;9.5E-68;2.7E-67;1.2E-66;1.9E-66;7.7E-65;7.9E-65;4.1E-64;1.5E-61;3.6E-61;6.7E-61;1.1E-59;1.1E-59;1.9E-59;3.9E-59;2.1E-58;2.3E-58;6.4E-58;9.7E-58	uncharacterized protein MSY001_3017 [Malassezia sympodialis ATCC 42132]	2.3e-192	321	312	2	310	90.38
MGYP000586389657	lipase family protein	254	1.8E-42;4.4E-42;1.6E-40;3.2E-40;5.0E-40;1.3E-39;2.4E-39;3.5E-39;5.9E-39;9.9E-39;9.9E-39;1.5E-38;2.6E-38;2.6E-38;3.0E-38;4.3E-38;5.6E-38;1.1E-37;1.8E-37;2.1E-37	lipase family protein [Rosistilla carotiformis]	1.8e-42	274	243	13	250	57.2
MGYP000586719619	alpha/beta fold hydrolase	408	2.7E-279;4.5E-278;2.6E-277;5.2E-277;2.1E-276;1.0E-274;3.6E-163;1.0E-93;5.8E-90;1.3E-88;1.8E-85;5.2E-83;1.9E-80;3.6E-80;4.6E-80;7.7E-79;1.2E-77;4.3E-77;4.8E-77;9.5E-77	alpha/beta fold hydrolase [Pseudoalteromonas spongiae]	2.7e-279	408	408	1	408	96.81
MGYP000588131683	triacylglycerol lipase	308	6.8E-171;2.1E-159;1.1E-158;6.8E-158;9.0E-158;2.6E-157;6.0E-157;1.3E-156;1.5E-156;1.7E-156;3.6E-156;5.1E-156;1.7E-155;2.9E-155;3.5E-155;3.5E-155;5.0E-155;8.4E-155;1.4E-154;1.7E-154	triacylglycerol lipase [Rhodoferax sp.]	6.8e-171	303	300	9	308	91
MGYP000588227973	triacylglycerol lipase	314	2.7E-139;4.1E-138;4.8E-137;6.9E-137;1.5E-136;2.1E-136;4.2E-136;4.9E-135;1.3E-134;7.2E-134;7.2E-134;2.3E-133;1.2E-130;1.3E-127;5.1E-122;1.0E-121;5.9E-121;7.1E-120;1.4E-119;2.9E-119	triacylglycerol lipase [Venatoribacter cucullus]	2.7e-139	313	284	32	314	80.63
MGYP000588976361	hypothetical protein	326	2.3E-43;8.0E-31;5.4E-30;2.6E-29;6.5E-27;2.2E-26;2.1E-23;2.7E-23;5.2E-23;1.4E-22;1.5E-22;6.0E-22;4.2E-21;1.7E-17;1.8E-17;2.3E-17;2.3E-17;2.3E-16;6.1E-16	hypothetical protein [Undibacterium terreum]	2.3e-43	324	300	15	301	53.33
MGYP000589671684	hypothetical protein	206	4.4E-154;3.5E-72;2.2E-35;3.5E-34	hypothetical protein [uncultured Paraglaciecola sp.]	4.4e-154	206	206	1	206	100
MGYP000589676363	alpha/beta hydrolase	284	3.3E-163;1.0E-159;1.2E-158;5.4E-147;1.3E-133;4.8E-133;1.5E-132;1.5E-132;6.2E-132;1.6E-131;3.6E-131;1.0E-130;3.0E-129;3.4E-129;4.8E-129;8.7E-129;1.4E-128;1.8E-128;5.3E-126;6.8E-126	alpha/beta hydrolase [Kiloniella spongiae]	3.3e-163	266	266	18	283	90.98
MGYP000589684529	hypothetical protein	234	4.4E-31;7.9E-31;1.4E-30;4.4E-30;3.4E-26	hypothetical protein [Hoeflea ulvae]	4.4e-31	266	180	1	171	54.44
MGYP000592316539	alpha/beta fold hydrolase	214	4.3E-82;1.2E-81;1.7E-81;1.2E-79;1.3E-78;5.6E-78;1.1E-77;2.3E-77;6.2E-77;6.4E-77;6.4E-77;7.2E-76;1.0E-75;1.0E-75;1.1E-75;1.1E-75;1.7E-75;2.8E-75;3.0E-75;3.0E-75	alpha/beta fold hydrolase [Pseudorhodobacter sp.]	4.3e-82	256	206	10	214	76.21
MGYP000592548106	triacylglycerol lipase	257	1.2E-66;1.4E-66;3.0E-66;9.2E-66;1.3E-65;2.6E-65;5.4E-65;1.5E-64;1.5E-64;3.1E-64;1.1E-63;1.4E-63;4.4E-63;7.5E-63;8.3E-63;1.0E-62;1.3E-62;1.5E-62;1.5E-62;1.5E-62	triacylglycerol lipase [Streptomyces sp. ISL-100]	1.2e-66	227	224	35	255	66.07
MGYP000592659531	alpha/beta fold hydrolase	252	8.6E-80;4.7E-68;2.5E-67;3.7E-67;1.2E-66;1.4E-66;1.7E-66;2.8E-66;3.9E-66;3.9E-66;3.9E-66;5.4E-66;1.1E-65;1.4E-65;1.5E-65;1.5E-65;2.1E-65;3.0E-65;4.3E-65;8.4E-65	alpha/beta fold hydrolase [Candidatus Solincola tengchongensis]	8.6e-80	466	239	15	252	71.55
MGYP000592661809	alpha/beta hydrolase	304	4.2E-54;9.2E-49;3.5E-48;4.5E-48;5.4E-48;6.3E-48;2.0E-47;1.5E-43;9.2E-39;3.6E-37;3.4E-35;9.2E-35;1.1E-34;1.3E-34	alpha/beta hydrolase [Caulifigura coniformis]	4.2e-54	224	223	42	264	60.09
MGYP000592685151	alpha/beta fold hydrolase	281	3.7E-206;1.5E-205;1.5E-205;1.5E-205;7.5E-204;9.7E-151;3.9E-150;3.5E-149;3.5E-149;3.9E-149;3.9E-149;5.5E-149;4.8E-148;5.0E-148;1.1E-147;1.2E-147;2.5E-147;2.6E-147;2.6E-147;2.6E-147	alpha/beta fold hydrolase [Corynebacterium bovis]	3.7e-206	281	281	1	281	100
MGYP000594049910	alpha/beta fold hydrolase	316	1.5E-76;4.1E-50;1.0E-48;2.5E-48;4.1E-48;4.5E-47;5.4E-47;1.3E-46;3.0E-46;2.3E-44;3.2E-44;2.8E-43;3.3E-43;3.4E-43;4.6E-43;4.7E-43;7.3E-43;8.6E-43;9.3E-43;1.6E-42	alpha/beta fold hydrolase [Casimicrobium huifangae]	1.5e-76	323	301	2	301	61.79
MGYP000595218226	radical SAM protein	464	1.6E-207;5.9E-151;8.3E-151;8.3E-151;1.2E-150;1.7E-150;6.8E-150;3.9E-149;8.5E-145;3.4E-144;6.9E-144;1.4E-143;1.9E-143;5.5E-143;1.1E-142;4.8E-134;4.5E-124;6.2E-120;4.2E-118;2.1E-114	radical SAM protein [Blautia sp.]	1.6e-207	459	455	5	459	77.58
MGYP000595298328	alpha/beta fold hydrolase	201	7.0E-33;3.3E-25;3.4E-25;4.5E-25;9.1E-25;3.7E-24;5.1E-24;5.2E-24;7.1E-24;1.4E-23;1.6E-23;3.3E-23;3.4E-23;6.8E-23;7.6E-23;8.6E-23;9.0E-23;1.1E-22;1.2E-22;1.2E-22	alpha/beta fold hydrolase [Haliangium ochraceum]	7e-33	342	172	4	174	58.14
MGYP000595300610	MULTISPECIES: alpha/beta hydrolase	261	1.0E-68;2.2E-68;3.0E-68;4.4E-68;8.6E-68;2.1E-67;3.2E-67;7.4E-67;6.1E-66;2.2E-65;4.8E-65;2.4E-64;4.8E-64;4.8E-64;8.2E-64;1.8E-63;2.1E-63;2.9E-63;3.0E-63;3.3E-63	MULTISPECIES: alpha/beta hydrolase [unclassified Thalassolituus]	1e-68	260	259	1	259	62.55
MGYP000595388524	alpha/beta hydrolase	382	6.7E-143;5.5E-142;6.9E-141;1.7E-138;8.3E-137;1.3E-133;4.1E-133;4.3E-131;4.3E-131;3.6E-130;6.1E-130;4.1E-129;1.2E-128;1.5E-128;1.6E-127;2.3E-127;2.3E-127;4.5E-127;1.6E-126;5.2E-126	alpha/beta hydrolase [Desulfogranum mediterraneum]	6.7e-143	641	374	2	375	71.12
MGYP000597013704	alpha/beta hydrolase	278	9.4E-150;3.9E-147;1.6E-146;2.3E-146;7.1E-126;1.4E-125;3.0E-125;4.0E-118;7.2E-117;2.0E-116;2.0E-116;4.1E-116;5.8E-116;6.3E-115;3.9E-114;5.5E-114;3.2E-113;6.4E-113;9.1E-113;3.7E-112	alpha/beta hydrolase [Colwellia sp. 20A7]	9.4e-150	266	262	15	276	88.17
MGYP000597249735	alpha/beta fold hydrolase	232	4.0E-77;1.8E-75;5.3E-75;7.5E-75;8.6E-74;1.2E-73;8.4E-73;2.1E-72;3.0E-72;4.5E-72;1.2E-71;2.3E-71;2.6E-71;1.0E-70;1.3E-70;1.4E-70;1.6E-70;1.9E-70;1.9E-70;2.0E-70	alpha/beta fold hydrolase [Pontibacter sp. HSC-36F09]	4e-77	232	226	4	229	66.81
MGYP000597361043	MULTISPECIES: alpha/beta fold hydrolase	199	3.5E-143;5.5E-140;8.9E-121;5.0E-118;1.9E-96;3.4E-95;1.0E-93;1.6E-93;2.3E-93;3.2E-93;6.5E-93;4.7E-91;2.1E-77;2.7E-76;3.2E-76;2.6E-75;3.7E-75;7.4E-75;1.1E-74;1.1E-74	MULTISPECIES: alpha/beta fold hydrolase [Synechococcaceae]	3.5e-143	199	199	1	199	100
MGYP000597820078	alpha/beta hydrolase	236	6.4E-28;7.9E-28;2.0E-26;1.1E-24;1.3E-24;1.5E-24;1.5E-24;2.3E-24;2.9E-24;1.2E-23;1.2E-22;1.7E-22;1.8E-22;2.8E-22;3.9E-22;4.9E-22;6.9E-22;8.3E-22;9.6E-22;8.1E-21	alpha/beta hydrolase [Lachnotalea sp. AF33-28]	6.4e-28	255	241	4	235	51.04
MGYP000598240354	lipase family protein	275	2.1E-159;4.5E-158;1.1E-156;3.2E-156;2.6E-155;5.7E-154;8.0E-154;8.0E-154;2.3E-153;3.9E-152;2.6E-150;2.6E-150;5.1E-150;7.3E-150;7.3E-150;1.0E-149;2.9E-149;3.0E-149;4.2E-149;5.6E-149	lipase family protein [Arthrobacter sp. UKPF54-2]	2.1e-159	295	273	4	275	90.11
MGYP000598401813	triacylglycerol lipase-like protein	193	3.9E-22;8.4E-22;2.4E-21;4.5E-21;4.5E-21;4.5E-21;4.5E-21;8.8E-21;8.8E-21;2.3E-20;3.3E-20;3.5E-20;6.5E-20;1.3E-19;1.9E-19;2.6E-19;4.8E-19;4.8E-19;4.8E-19;1.7E-18	triacylglycerol lipase-like protein [Thermochaetoides thermophila DSM 1495]	3.9e-22	333	124	70	193	62.1
MGYP000598473967	alpha/beta fold hydrolase	226	2.6E-87;5.0E-32	alpha/beta fold hydrolase [Spongiibacter thalassae]	2.6e-87	249	220	5	224	69.09
MGYP000599943724	3-oxoadipate enol-lactonase	262	3.8E-137;1.4E-125;2.8E-125;1.1E-124;2.5E-121;7.3E-121;1.0E-120;1.5E-120;2.4E-119;4.9E-119;9.8E-119;4.0E-118;7.6E-116;1.1E-115;2.2E-115;4.4E-115;7.2E-114;1.1E-110;2.6E-109;5.3E-109	3-oxoadipate enol-lactonase [Phaeobacter sp. HF9A]	3.8e-137	262	262	1	262	83.97
MGYP000600204421	triacylglycerol lipase	319	1.3E-160;3.5E-150;5.9E-136;8.3E-136;3.4E-135;3.4E-135;3.4E-135;4.8E-135;6.8E-135;2.0E-134;5.3E-129;2.5E-127;3.1E-126;8.0E-126;6.3E-125;9.0E-125;1.3E-124;1.4E-124;1.0E-123;1.0E-123	triacylglycerol lipase [Pseudenhygromyxa sp. WMMC2535]	1.3e-160	316	298	24	319	85.91
MGYP000601517188	alpha/beta hydrolase	247	2.1E-102;1.9E-59;2.6E-59;1.1E-57;2.6E-56;4.8E-56;1.9E-55;2.7E-55;5.8E-55;3.2E-49;1.4E-47;3.2E-47;3.3E-46;1.4E-45;2.0E-45;2.8E-45;1.1E-44;8.2E-44;2.2E-43;5.1E-43	alpha/beta hydrolase [Pseudobacteroides cellulosolvens]	2.1e-102	242	241	6	246	75.93
MGYP000603118952	hypothetical protein SAMD00019534_053510, partial	201	1.6E-18;3.8E-17;4.1E-17;1.6E-16;2.6E-16	hypothetical protein SAMD00019534_053510, partial [Acytostelium subglobosum LB1]	1.6e-18	298	146	56	201	55.48
MGYP000603790176	alpha/beta fold hydrolase	283	1.2E-99;3.8E-91;9.0E-90;2.8E-89;5.3E-89;3.4E-88;1.1E-86;2.3E-84;3.4E-84;1.6E-83;1.1E-82;1.4E-82;1.7E-82;3.2E-82;3.6E-82;9.3E-82;2.0E-81;1.8E-80;2.0E-80;2.1E-80	alpha/beta fold hydrolase [Streptacidiphilus jiangxiensis]	1.2e-99	319	225	59	283	80
MGYP000605884277	alpha/beta fold hydrolase	276	1.5E-72;1.5E-69;8.1E-69;2.7E-68;1.7E-27;2.4E-26;9.1E-26;1.2E-25;3.4E-25;5.2E-25;7.3E-25;1.0E-24;1.9E-24;2.5E-24;3.6E-24;4.1E-24;7.1E-24;8.0E-24;5.1E-23;8.4E-23	alpha/beta fold hydrolase [Mycolicibacterium sp.]	1.5e-72	283	249	15	261	65.46
MGYP000606602783	hypothetical protein	334	2.7E-100;1.7E-80;6.2E-56;8.1E-55;2.8E-54;9.4E-53;1.2E-52;1.3E-52;2.4E-52;3.7E-52;4.8E-52;6.8E-52;6.8E-52;2.3E-51;2.7E-51;3.0E-51;3.1E-51;3.8E-51;5.1E-51;5.3E-51	hypothetical protein [Baekduia alba]	2.7e-100	333	305	32	334	68.2
MGYP000607081142	alpha/beta hydrolase	288	2.7E-83;4.9E-76;5.9E-66;1.2E-57;9.4E-50;5.7E-47;9.7E-47;6.6E-46;1.3E-45;1.6E-45;3.8E-45;4.9E-45;1.1E-44;2.0E-43;2.2E-43;2.3E-43;4.0E-43;3.0E-42;6.1E-42;7.8E-39	alpha/beta hydrolase [Ilumatobacter nonamiensis]	2.7e-83	301	277	12	285	64.98
MGYP000607131340	alpha/beta fold hydrolase	264	6.1E-109;2.3E-104;6.8E-104;1.3E-101;1.3E-101;1.8E-101;1.1E-97;1.5E-97;1.3E-96;5.2E-96;5.6E-95;3.5E-94;7.2E-94;1.4E-93;2.6E-93;2.6E-93;2.8E-93;7.8E-93;1.1E-92;1.8E-92	alpha/beta fold hydrolase [Flavilitoribacter nigricans]	6.1e-109	254	253	8	260	78.66
MGYP000609026270	alpha/beta fold hydrolase	258	7.8E-23;2.1E-22;1.3E-21;1.6E-21;3.9E-21;7.5E-21;7.5E-21;9.7E-21;1.4E-20;1.7E-20;1.8E-20;1.9E-20;2.3E-20;2.8E-20;2.8E-20;2.9E-20;3.7E-20;3.9E-20;4.5E-20;5.4E-20	alpha/beta fold hydrolase [Janibacter sp. DB-40]	7.8e-23	308	211	49	253	54.03
MGYP000609145890	alpha/beta fold hydrolase	205	1.4E-114;1.5E-65;1.2E-64;3.4E-64;7.5E-64;5.2E-63;3.0E-62;3.0E-62;3.6E-60;4.5E-60;3.8E-59;3.8E-59;5.4E-59;2.6E-57;3.6E-57;3.6E-57;5.8E-42;3.2E-40;7.2E-40;7.1E-39	alpha/beta fold hydrolase [Litorivivens lipolytica]	1.4e-114	260	182	14	195	95.05
MGYP000609624132	alpha/beta hydrolase	279	3.0E-167;4.6E-111;4.5E-97;4.5E-97;1.5E-77;2.2E-76;2.2E-76;1.3E-75;3.0E-74;2.0E-73;5.2E-73;6.8E-73;9.7E-73;2.1E-72;2.6E-71;3.0E-71;7.4E-71;2.6E-70;2.9E-70;8.7E-70	alpha/beta hydrolase [Deinococcus sp.]	3e-167	286	252	18	265	97.22
MGYP000610076379	lipase family protein	285	4.5E-45;9.4E-39;4.4E-38;1.3E-37;8.1E-34;2.4E-32;4.9E-31;6.1E-30;2.9E-29;1.4E-23;2.1E-19;4.1E-19;4.3E-18;4.5E-18;7.7E-18;1.0E-17;3.8E-17;3.9E-17;7.4E-17;9.3E-17	lipase family protein [uncultured Clostridium sp.]	4.5e-45	297	296	4	283	53.38
MGYP000611990320	alpha/beta fold hydrolase	267	2.8E-52;1.9E-51;1.8E-50;2.0E-50;2.3E-50;2.4E-50;7.2E-50;9.3E-50;1.2E-49;1.2E-49;1.8E-49;2.4E-49;2.6E-49;2.8E-49;3.3E-49;3.4E-49;3.5E-49;6.6E-49;7.2E-49;7.6E-49	alpha/beta fold hydrolase [Prauserella halophila]	2.8e-52	253	248	22	264	56.85
MGYP000612038277	XVIPCD domain-containing protein	204	1.5E-27;1.5E-27;1.5E-27;1.5E-27;1.5E-27;1.5E-27;2.8E-27;5.5E-25;9.4E-25;1.5E-24;1.5E-24;1.5E-24;1.5E-24;1.5E-24;1.5E-24;1.5E-24;1.5E-24;2.0E-24;2.0E-24;2.8E-24	XVIPCD domain-containing protein [Stenotrophomonas sp. ZAC14D2_NAIMI4_6]	1.5e-27	436	178	3	178	56.74
MGYP000612085866	lipase family protein	230	2.1E-113;3.5E-30;8.5E-30;4.2E-29;9.7E-29;1.1E-28;1.2E-28;2.1E-28;2.3E-28;4.7E-28;8.2E-28;1.1E-27;1.1E-27;3.1E-27;4.5E-27;1.3E-26;1.6E-26;2.3E-26;2.4E-26;2.7E-26	lipase family protein [Neolewinella persica]	2.1e-113	493	216	15	230	84.26
MGYP000612107705	alpha/beta hydrolase	290	6.2E-51;1.2E-49;9.3E-48;5.3E-47;2.3E-46;6.2E-46;2.4E-45;6.7E-41;7.3E-40;2.1E-36;2.5E-33;9.4E-32;4.8E-31	alpha/beta hydrolase [Vibrio gazogenes]	6.2e-51	300	282	9	287	57.09
MGYP000612112767	hypothetical protein	368	1.3E-139;1.8E-139;2.3E-139;1.3E-138;2.4E-138;6.8E-138;7.6E-138;1.1E-137;1.4E-137;2.8E-137;3.9E-137;6.3E-137;9.7E-137;3.2E-136;4.5E-136;1.1E-135;1.6E-135;1.8E-135;2.4E-135;3.0E-135	hypothetical protein [Caballeronia temeraria]	1.3e-139	383	341	17	357	75.37
MGYP000615280304	alpha/beta hydrolase	359	4.3E-148;2.5E-147;8.3E-144;2.4E-143;2.8E-142;4.9E-142;5.7E-142;1.6E-141;2.3E-141;2.7E-140;2.7E-140;6.2E-139;8.8E-139;8.8E-139;1.8E-138;5.0E-138;1.0E-137;1.7E-127;5.0E-126;7.1E-125	alpha/beta hydrolase [Eubacterium limosum]	4.3e-148	355	345	10	354	78.84
MGYP000616260785	alpha/beta hydrolase, partial	303	1.3E-35;5.1E-34;1.5E-32;7.3E-32;3.1E-31;3.6E-31;3.7E-31;4.4E-31;5.3E-31;5.3E-31;5.3E-31;6.0E-31;6.1E-31;7.5E-31;8.6E-31;1.0E-30;1.1E-30;1.1E-30;1.1E-30;1.5E-30	alpha/beta hydrolase, partial [Xanthovirga aplysinae]	1.3e-35	210	206	95	299	54.85
MGYP000617720741	alpha/beta fold hydrolase	269	5.4E-103;1.3E-80;2.1E-79;2.1E-77;2.7E-77;1.5E-76;4.7E-76;1.8E-75;3.9E-75;1.1E-74;4.1E-74;8.2E-74;8.2E-74;2.6E-73;3.1E-73;6.8E-73;7.8E-73;9.1E-73;1.5E-72;2.0E-72	alpha/beta fold hydrolase [Trebonia sp.]	5.4e-103	270	265	1	265	75.47
MGYP000617915005	hypothetical protein	345	5.4E-176;2.7E-104;2.9E-87;3.0E-76;1.9E-75;2.1E-74;4.7E-20;6.9E-20;5.5E-19;1.0E-18;1.8E-18;8.0E-18;1.1E-17;1.1E-17;2.7E-17;4.6E-17;6.1E-17;6.1E-17;8.6E-17;1.2E-16	hypothetical protein [Paraliomyxa miuraensis]	5.4e-176	464	349	1	342	80.23
MGYP000618740229	lipase family protein	189	1.5E-35;2.9E-35;5.8E-35;1.7E-34;4.1E-34;2.3E-33;5.4E-33;2.8E-32;5.9E-32;8.3E-32;8.3E-32;1.2E-31;1.3E-30;2.4E-30;2.8E-30;5.6E-30;6.6E-30;7.3E-30;9.3E-30;2.1E-29	lipase family protein [Mycobacterium kyorinense]	1.5e-35	253	182	4	180	57.14
MGYP000618776516	alpha/beta hydrolase	276	1.4E-73;2.0E-68;8.4E-68;7.9E-66;2.6E-63;1.0E-62;3.9E-61;2.7E-55;5.2E-55;9.9E-54;9.9E-54;1.4E-53;2.1E-53;1.1E-52;1.1E-52;2.2E-52;5.0E-52;8.0E-52;1.4E-51;3.2E-51	alpha/beta hydrolase [Halobacteriovorax sp. GB3]	1.4e-73	275	267	9	274	64.04
MGYP000618778924	MULTISPECIES: lipase	283	1.5E-108;6.5E-101;1.9E-100;1.9E-100;2.6E-100;2.6E-100;2.6E-100;3.7E-100;3.0E-99;6.1E-99;6.8E-98;7.1E-98;1.0E-97;8.1E-97;2.3E-96;3.3E-96;6.6E-96;9.4E-96;1.3E-95;1.3E-95	MULTISPECIES: lipase [unclassified Psychrosphaera]	1.5e-108	259	258	25	282	76.36
MGYP000618887805	alpha/beta fold hydrolase	275	5.3E-23;9.6E-23;3.0E-22;9.8E-22;2.6E-21;1.6E-20;1.6E-20;1.8E-20;9.6E-20;9.9E-20;1.3E-19;1.6E-19;3.6E-19;4.4E-19;5.0E-19;6.2E-19;6.9E-19;6.9E-19;6.9E-19;9.6E-19	alpha/beta fold hydrolase [Flocculibacter collagenilyticus]	5.3e-23	300	180	85	260	51.11
MGYP000620534500	alpha/beta hydrolase	281	7.6E-34;3.1E-30;2.3E-29;4.3E-25;3.5E-21;3.1E-20;5.2E-20;5.2E-20;5.4E-20;5.8E-20;3.6E-18	alpha/beta hydrolase [Maioricimonas rarisocia]	7.6e-34	231	231	49	274	53.68
MGYP000620717043	alpha/beta fold hydrolase	314	1.7E-120;6.7E-120;1.7E-119;3.9E-119;5.5E-119;4.5E-118;5.9E-117;3.3E-116;6.6E-116;1.4E-114;5.4E-114;1.3E-113;1.8E-113;1.7E-112;1.8E-112;5.3E-112;7.6E-112;6.1E-111;8.7E-111;1.2E-110	alpha/beta fold hydrolase [Noviherbaspirillum sp.]	1.7e-120	320	310	1	310	73.87
MGYP000620886735	alpha/beta fold hydrolase	196	5.1E-91;3.8E-86;6.3E-85;1.2E-82;7.6E-79;4.2E-76;8.4E-76;6.8E-48;8.9E-46;5.5E-45;7.8E-45;3.9E-44;7.8E-44;1.4E-43;4.4E-43;4.4E-43;6.6E-43;9.4E-42;1.1E-41;1.2E-41	alpha/beta fold hydrolase [Candidatus Rhodoluna planktonica]	5.1e-91	196	196	1	196	78.57
MGYP000621341036	alpha/beta hydrolase	263	3.1E-73;1.7E-69;6.9E-68;4.3E-67;2.4E-64;4.0E-64;1.1E-63;1.5E-63;8.1E-63;1.5E-62;2.9E-62;6.1E-62;1.4E-61;1.7E-60;2.2E-60;4.0E-58;6.4E-58;2.1E-57;3.2E-57;4.6E-57	alpha/beta hydrolase [Granulicella sp. L60]	3.1e-73	259	252	1	251	65.08
MGYP000621722814	lipase family protein	337	5.6E-53;9.4E-47;2.2E-43;4.4E-43;1.1E-42;3.0E-38;4.2E-38;2.6E-35;4.8E-34;1.6E-32;1.8E-32;4.3E-32;3.0E-31;1.6E-27;2.6E-27;4.0E-25;4.2E-25;5.5E-25;1.3E-24;2.9E-24	lipase family protein [Mariprofundus sp. EBB-1]	5.6e-53	302	298	30	324	55.03
MGYP000623638099	alpha/beta fold hydrolase	205	1.1E-51;2.5E-31;3.5E-31;4.9E-31;9.8E-31;2.7E-30;7.4E-30;7.4E-30;2.9E-29;5.4E-29;5.4E-27;9.0E-27;3.9E-26;1.3E-25;4.4E-25;5.3E-25;6.2E-25;6.6E-25;8.7E-25;1.0E-24	alpha/beta fold hydrolase [Haliangium ochraceum]	1.1e-51	342	194	1	193	67.01
MGYP000623900604	MULTISPECIES: alpha/beta hydrolase	270	1.8E-41;3.7E-41;7.8E-40;1.6E-39;1.6E-39;1.6E-39;3.1E-39;3.6E-39;4.2E-39;9.3E-39;1.2E-38;1.7E-38;4.8E-38;6.9E-38;1.3E-37;2.4E-37;3.9E-37;5.1E-37;5.4E-37;5.4E-37	MULTISPECIES: alpha/beta hydrolase [unclassified Anabaena]	1.8e-41	265	270	1	270	50.37
MGYP000624836843	alpha/beta hydrolase	293	8.2E-97;5.2E-95;1.5E-93;3.1E-82;2.7E-80;2.7E-80;3.9E-77;4.7E-76;1.2E-50;1.7E-50;1.5E-49;6.5E-49;1.7E-48;4.2E-48;9.6E-48;2.0E-47;2.8E-47;5.4E-47;6.2E-47;7.2E-47	alpha/beta hydrolase [Litorimonas cladophorae]	8.2e-97	293	292	1	292	68.84
MGYP000624981276	alpha/beta hydrolase	289	1.0E-96;1.2E-96;4.7E-92;8.0E-91;1.5E-89;2.3E-79;4.5E-72;3.2E-66;2.6E-65;8.4E-64;1.4E-61;1.2E-57;2.4E-56;4.9E-53;9.2E-53;1.9E-52;2.6E-50;2.3E-48;4.0E-48;4.2E-48	alpha/beta hydrolase [Patulibacter sp.]	1e-96	314	281	13	287	65.84
MGYP000626523959	alpha/beta hydrolase	268	2.8E-136;6.4E-136;8.7E-134;1.3E-112;2.8E-100;2.8E-98;4.0E-98;3.0E-97;6.5E-97;9.6E-95;2.1E-94;2.3E-94;9.4E-94;1.9E-93;1.1E-92;6.4E-92;1.3E-91;4.1E-89;6.3E-89;9.5E-89	alpha/beta hydrolase [Stenomitos frigidus]	2.8e-136	272	269	1	267	85.87
MGYP000626605101	alpha/beta hydrolase	270	1.2E-54;2.3E-50;2.2E-44;1.2E-42;3.5E-42;4.7E-38;1.6E-37;2.9E-37;2.7E-36;3.0E-36;5.6E-36;3.2E-35;6.1E-35;8.3E-35;8.5E-35;1.2E-34;1.2E-34;1.3E-34;1.3E-34;3.3E-34	alpha/beta hydrolase [Nitrosomonas nitrosa]	1.2e-54	449	261	7	264	58.62
MGYP000626844025	alpha/beta fold hydrolase	273	9.7E-88;4.1E-83;6.6E-79;6.7E-72;1.9E-71;2.7E-71;3.8E-71;7.5E-71;1.1E-70;1.1E-70;3.0E-70;6.4E-70;1.2E-69;1.7E-69;2.4E-69;6.8E-69;9.7E-69;1.3E-68;1.6E-68;1.9E-68	alpha/beta fold hydrolase [Bermanella sp. WJH001]	9.7e-88	282	264	8	271	66.67
MGYP000627250879	hypothetical protein	397	1.7E-197;4.6E-112;1.3E-111;2.3E-111;5.3E-111;7.3E-111;2.1E-110;2.9E-110;3.1E-110;4.3E-110;4.3E-110;5.8E-110;6.2E-110;6.7E-110;1.0E-109;1.2E-109;1.3E-109;1.6E-109;1.9E-109;2.1E-109	hypothetical protein [Luminiphilus sp.]	1.7e-197	384	383	8	390	82.51
MGYP000630776841	lipase family protein	250	3.0E-16;4.0E-16;4.1E-16;7.5E-16;9.4E-16;9.9E-16	lipase family protein [Pseudomonas sp. NKUCC02_KPG]	3e-16	735	139	68	200	57.55
MGYP000630924675	alpha/beta fold hydrolase	220	1.5E-26;3.1E-26;5.2E-26;6.4E-26;1.4E-25;4.0E-25;4.3E-25;6.3E-25;8.7E-25;1.2E-24;1.3E-24;1.4E-24;1.4E-24;1.4E-24;1.5E-24;1.6E-24;1.6E-24;1.6E-24;1.9E-24;1.9E-24	alpha/beta fold hydrolase [Streptomyces pathocidini]	1.5e-26	299	195	18	210	53.33
MGYP000630984083	lipase family protein	185	1.8E-59;3.1E-27;4.7E-27;6.6E-27;9.3E-27;1.2E-26;2.3E-26;5.1E-26;2.5E-25;4.3E-25;4.0E-24;5.3E-24;5.7E-24;5.9E-24;8.0E-24;1.1E-23;1.1E-23;1.6E-23;2.2E-23;4.4E-23	lipase family protein [Pleionea sp. CnH1-48]	1.8e-59	248	185	1	185	67.57
MGYP000631400492	Mbeg1-like protein	283	1.5E-206;5.9E-204;1.7E-203;2.8E-202;8.1E-202;8.3E-195;2.0E-193;8.0E-193;3.6E-189;1.0E-188;8.6E-188;1.2E-187;9.8E-178;9.1E-98;4.9E-96;6.1E-96;2.0E-95;2.0E-95;5.9E-86;1.8E-85	Mbeg1-like protein [Eubacterium callanderi]	1.5e-206	283	283	1	283	100
MGYP000632417039	triacylglycerol lipase	197	1.2E-51;3.4E-51;1.5E-50;9.0E-50;1.4E-48;1.5E-48;1.9E-48;6.0E-48;2.3E-47;3.2E-47;3.4E-47;4.5E-47;6.4E-47;9.4E-47;1.0E-46;1.3E-46;4.5E-46;6.4E-46;9.9E-46;1.4E-45	triacylglycerol lipase [Leptolyngbya sp. BC1307]	1.2e-51	197	176	8	183	66.48
MGYP000632479939	alpha/beta hydrolase	249	2.2E-45;1.1E-44;1.1E-44;1.6E-44;2.3E-44;4.8E-44;5.2E-44;6.5E-44;9.7E-44;1.4E-43;2.5E-43;2.5E-43;2.5E-43;2.5E-43;2.9E-43;5.0E-43;5.9E-43;7.9E-43;1.1E-42;2.0E-42	alpha/beta hydrolase [Nocardioides immobilis]	2.2e-45	274	251	1	246	56.97
MGYP000635542468	alpha/beta hydrolase, partial	236	3.8E-74;2.5E-48;5.0E-48;5.6E-47;8.0E-47;8.0E-47;4.5E-46;9.7E-46;2.8E-45;7.1E-45;1.7E-44;1.5E-43;4.4E-43;1.2E-41;2.3E-41;9.0E-41;2.0E-40;2.7E-40;1.3E-38;7.4E-38	alpha/beta hydrolase, partial [Phenylobacterium sp.]	3.8e-74	267	226	11	236	69.47
MGYP000635696404	hypothetical protein	214	7.2E-44;4.2E-38;7.5E-36;9.9E-35;1.0E-33;3.9E-33;2.4E-31;3.5E-31;7.0E-31;2.1E-30;2.9E-30;5.5E-30;8.2E-30;1.5E-29;1.2E-28;4.1E-28;4.6E-28;4.8E-28;1.3E-27;1.8E-27	hypothetical protein [Mangrovicoccus sp. HB161399]	7.2e-44	230	206	7	208	59.71
MGYP000636085866	alpha/beta hydrolase	303	2.2E-116;1.5E-88;7.8E-81;3.6E-50;8.3E-50;4.0E-49;4.7E-47;9.3E-47;1.8E-46;1.9E-46;8.4E-46;1.1E-45;1.4E-45;1.7E-45;2.0E-45;4.0E-45;4.7E-45;4.7E-45;6.6E-45;1.1E-44	alpha/beta hydrolase [Nitrososphaera viennensis]	2.2e-116	292	282	22	303	75.53
MGYP000636455760	3-oxoadipate enol-lactonase	253	2.5E-99;9.2E-98;1.5E-91;1.4E-83;1.9E-83;6.9E-81;9.0E-81;1.0E-80;6.7E-80;2.1E-79;2.4E-79;2.5E-79;5.6E-79;1.0E-78;3.0E-78;1.1E-77;1.3E-77;1.3E-77;2.4E-77;5.2E-77	3-oxoadipate enol-lactonase [Phytoactinopolyspora endophytica]	2.5e-99	259	253	3	252	75.1
MGYP000638375496	AcvB/VirJ family lysyl-phosphatidylglycerol hydrolase	478	6.0E-171;5.1E-161;1.1E-156;1.6E-156;1.6E-156;3.8E-155;7.5E-155;7.5E-155;7.5E-155;1.5E-154;2.2E-154;2.2E-154;3.0E-154;3.0E-154;4.3E-154;6.1E-154;6.1E-154;2.4E-153;3.5E-153;3.6E-153	AcvB/VirJ family lysyl-phosphatidylglycerol hydrolase [Aquipluma nitroreducens]	6e-171	483	474	1	474	66.88
MGYP000639038984	alpha/beta fold hydrolase	270	1.5E-47;4.6E-45;1.8E-44;1.1E-42;2.1E-42;5.5E-42;2.0E-41;2.3E-41;7.8E-41;1.0E-40;1.0E-40;1.2E-40;1.2E-40;1.4E-40;2.0E-40;2.2E-40;2.2E-40;2.9E-40;3.0E-40;3.0E-40	alpha/beta fold hydrolase [Micromonospora sp. R77]	1.5e-47	293	260	17	270	56.92
MGYP000639723975	alpha/beta fold hydrolase	269	4.7E-169;2.7E-168;6.6E-144;1.9E-143;8.9E-121;5.1E-120;2.5E-108;4.2E-97;8.4E-97;8.4E-97;2.4E-96;9.7E-96;2.0E-95;2.8E-95;3.9E-95;3.9E-95;5.6E-95;5.6E-95;1.6E-94;6.4E-94	alpha/beta fold hydrolase [Variovorax sp. N23]	4.7e-169	269	269	1	269	92.94
MGYP000641165989	putative lipase	348	9.8E-248;9.6E-235;8.3E-187;2.4E-162;2.0E-161;9.3E-159;1.1E-158;7.3E-157;2.0E-156;6.2E-156;3.1E-155;3.3E-155;6.6E-153;1.8E-103;9.7E-100;2.0E-95;1.8E-91;4.6E-91;1.9E-87;1.4E-80	putative lipase [Candida albicans SC5314]	9.8e-248	333	325	24	348	99.69
MGYP000641473891	alpha/beta fold hydrolase	409	4.0E-120;1.1E-114;2.2E-108;2.3E-107;3.8E-107;8.3E-106;1.3E-105;3.1E-103;7.9E-80;1.1E-78;1.2E-76;1.8E-76;1.9E-76;1.3E-75;2.1E-73;6.8E-73;2.1E-72;6.0E-72;2.3E-71;3.2E-71	alpha/beta fold hydrolase [Luteolibacter yonseiensis]	4e-120	420	406	11	409	60.59
MGYP000644175407	alpha/beta hydrolase	277	3.7E-155;3.5E-86;1.2E-84;4.9E-84;9.9E-84;1.6E-82;1.6E-80;1.8E-80;5.3E-80;8.3E-80;1.1E-79;3.0E-79;3.0E-79;5.7E-79;8.6E-79;1.2E-78;1.2E-78;1.2E-78;1.7E-78;1.7E-78	alpha/beta hydrolase [Trichothermofontia sichuanensis]	3.7e-155	282	277	1	277	85.92
MGYP000644264469	alpha/beta hydrolase	294	7.0E-106;6.3E-92;1.3E-91;5.1E-91;5.1E-91;7.3E-91;7.3E-91;7.3E-91;1.5E-90;2.1E-90;2.9E-90;2.9E-90;5.3E-90;5.9E-90;5.9E-90;8.4E-90;1.2E-89;1.2E-89;1.7E-89;3.4E-89	alpha/beta hydrolase [Conexibacter sp. SYSU D00693]	7e-106	263	261	30	290	72.03
MGYP000644284414	alpha/beta hydrolase	380	3.8E-76;2.8E-73;1.2E-71;5.3E-66;9.5E-66;1.9E-65;2.5E-62;8.6E-60;8.6E-47;8.6E-47;8.6E-47;3.4E-46;3.4E-46;4.7E-46;6.6E-46;6.6E-46;9.3E-46;1.3E-45;1.3E-45;1.3E-45	alpha/beta hydrolase [Dokdonella sp.]	3.8e-76	285	264	92	354	60.23
MGYP000645307746	alpha/beta hydrolase	231	2.5E-56;2.5E-56;8.7E-55;1.4E-53;4.5E-52;7.3E-50;1.7E-49;1.1E-48;1.3E-48;9.9E-47;2.8E-46;9.8E-45;1.7E-44;2.0E-44;6.3E-44;8.0E-44;2.5E-43;2.5E-43;3.5E-43;3.5E-43	alpha/beta hydrolase [Pseudogracilibacillus auburnensis]	2.5e-56	238	230	2	226	61.74
MGYP000645461664	triacylglycerol lipase	233	4.9E-30;1.4E-29;1.9E-29;6.8E-29;8.7E-29;1.3E-28;2.1E-28;3.1E-28;3.6E-28;5.5E-28;7.0E-28;1.6E-27;2.0E-27;2.0E-27;2.3E-27;2.9E-27;3.1E-27;3.1E-27;4.3E-27;5.7E-27	triacylglycerol lipase [Argonema galeatum]	4.9e-30	213	187	13	195	56.68
MGYP000645618084	alpha/beta fold hydrolase	310	2.1E-93;1.5E-33;9.6E-17;4.3E-16	alpha/beta fold hydrolase [Spongiibacter thalassae]	2.1e-93	249	237	72	305	70.46
MGYP000647334108	hypothetical protein	303	2.3E-163;2.3E-23;2.5E-23;6.8E-23;1.4E-21;3.0E-21;8.2E-20;2.5E-19;3.4E-19;4.1E-18;5.8E-18;2.6E-17;2.9E-17;3.9E-17;3.9E-17;1.4E-16;7.1E-16;7.1E-16;9.3E-16	hypothetical protein [Polymorphobacter arshaanensis]	2.3e-163	303	302	1	302	83.77
MGYP000647878191	lipase family protein	208	3.4E-28;9.0E-28;1.6E-27;2.3E-27;1.8E-26;2.5E-26;4.1E-26;1.5E-25;1.9E-24;1.6E-23;3.1E-23;9.5E-21;1.1E-20;1.4E-20;3.3E-19;6.6E-19;7.6E-19;1.1E-18;1.5E-18;2.9E-18	lipase family protein [Paenibacillus sp. H1-7]	3.4e-28	264	170	40	208	55.29
MGYP000648249097	alpha/beta fold hydrolase	291	3.1E-119;9.4E-113;2.7E-107;3.4E-103;1.5E-77;5.6E-29	alpha/beta fold hydrolase [Candidatus Nitrosocosmicus arcticus]	3.1e-119	267	234	43	276	85.04
MGYP000648692238	alpha/beta fold hydrolase	347	5.2E-263;1.5E-262;1.5E-262;6.1E-262;2.3E-241;9.4E-241;1.8E-213;1.8E-213;7.2E-213;4.0E-210;5.4E-208;9.0E-207;4.7E-202;3.7E-199;3.2E-193;8.7E-191;1.0E-93;4.1E-93;1.2E-92;2.0E-89	alpha/beta fold hydrolase [Gimesia chilikensis]	5.2e-263	351	347	1	347	100
MGYP000650304630	alpha/beta fold hydrolase	460	3.9E-303;2.1E-298;2.4E-297;1.6E-295;5.4E-294;2.1E-284;8.0E-266;3.5E-262;4.9E-260;4.7E-258;5.8E-254;2.4E-253;4.9E-253;4.8E-234;9.2E-232;3.0E-231;3.0E-230;5.0E-229;7.1E-229;7.4E-229	alpha/beta fold hydrolase [Limnohabitans sp. 2KL-51]	3.9e-303	460	460	1	460	93.48
MGYP000650402254	MULTISPECIES: thioesterase domain-containing protein	262	3.4E-197;4.0E-196;1.6E-195;1.6E-195;2.9E-189;8.4E-189;2.4E-188;1.4E-187;4.7E-186;6.5E-177;2.4E-172;3.5E-172;7.0E-172;7.0E-172;9.9E-172;9.9E-172;2.8E-171;2.8E-171;5.7E-171;1.6E-170	MULTISPECIES: thioesterase domain-containing protein [Alteromonas]	3.4e-197	262	262	1	262	100
MGYP000650825673	alpha/beta hydrolase	237	8.5E-85;1.4E-72;3.6E-72;4.4E-71;2.7E-68;1.6E-66;2.0E-65;2.1E-64;1.2E-63;2.2E-63;5.8E-63;6.9E-63;8.7E-63;9.8E-63;1.4E-62;2.8E-62;7.0E-62;8.4E-62;1.8E-61;3.2E-61	alpha/beta hydrolase [Antrihabitans stalactiti]	8.5e-85	263	236	1	236	67.8
MGYP000651570005	MULTISPECIES: alpha/beta hydrolase	288	1.2E-217;1.7E-217;6.8E-217;1.7E-210;4.7E-189;2.5E-121;3.9E-118;1.1E-117;3.5E-112;3.7E-112;1.1E-111;3.6E-109;5.6E-109;8.0E-109;1.1E-108;1.1E-108;1.5E-108;1.6E-108;1.6E-108;1.4E-106	MULTISPECIES: alpha/beta hydrolase [unclassified Spongiibacter]	1.2e-217	288	288	1	288	100
MGYP000653129856	alpha/beta fold hydrolase	239	2.7E-42;3.1E-42;5.2E-41;4.4E-39;6.4E-37;1.4E-36;1.5E-36;2.3E-36;3.0E-36;4.0E-36;9.8E-36;1.4E-35;7.0E-35;7.3E-35;2.5E-33;3.9E-33;1.4E-32;3.4E-32;1.9E-28;3.7E-28	alpha/beta fold hydrolase [Phyllobacterium sp. UNC302MFCol5.2]	2.7e-42	398	203	39	239	58.13
MGYP000654138739	lipase domain containing protein	227	1.1E-61;3.4E-17;3.4E-17	lipase domain containing protein [Blastocystis sp. subtype 4]	1.1e-61	558	168	60	227	79.76
MGYP000654448628	lipase family protein	228	4.7E-130;6.2E-129;7.6E-129;5.1E-128;6.4E-95;3.0E-93;4.2E-93;3.5E-92;6.9E-92;6.9E-92;5.4E-84;1.6E-82;2.0E-82;7.9E-82;1.1E-78;2.7E-76;5.0E-64;9.3E-64;1.2E-62;1.5E-61	lipase family protein [Limnobacter sp.]	4.7e-130	409	228	1	228	90.79
MGYP000654514629	alpha/beta fold hydrolase	291	2.3E-111;3.1E-107;4.6E-96;8.9E-96;1.0E-94;3.5E-94;4.6E-94;1.6E-91;4.2E-89;3.1E-87;4.4E-87;3.1E-86;1.4E-82;8.3E-68;8.4E-68;1.2E-64;1.1E-28;2.2E-28;2.2E-28;4.1E-26	alpha/beta fold hydrolase [Bacteriovorax sp. DB6_IX]	2.3e-111	286	283	1	283	70.67
MGYP000654541578	hypothetical protein	337	2.4E-158;1.7E-148;1.7E-86;2.7E-84;6.0E-84;1.0E-83;1.6E-83;8.2E-83;1.1E-82;1.9E-82;4.4E-82;1.8E-81;6.6E-81;2.8E-80;3.7E-80;4.4E-80;9.8E-79;2.7E-78;5.8E-78;2.7E-77	hypothetical protein [Paraconexibacter algicola]	2.4e-158	424	329	9	337	77.81
MGYP000658997419	hypothetical protein	240	2.3E-95;6.2E-94;1.9E-86;2.7E-86;7.7E-86;3.6E-85;6.2E-84;1.2E-83;2.9E-83;4.4E-83;6.1E-83;1.5E-81;2.9E-81;2.9E-81;3.5E-81;4.1E-81;6.4E-81;9.3E-81;1.2E-80;5.0E-80	hypothetical protein [Alicyclobacillus pomorum]	2.3e-95	360	218	12	229	76.61
MGYP000659172983	alpha/beta fold hydrolase	256	1.6E-82;1.2E-80;1.2E-79;5.0E-79;7.1E-79;1.0E-78;2.0E-78;4.2E-78;1.2E-77;1.2E-77;1.2E-77;1.6E-77;1.9E-77;2.3E-77;2.7E-77;3.3E-77;3.3E-77;3.6E-77;3.6E-77;3.8E-77	alpha/beta fold hydrolase [Adhaeribacter swui]	1.6e-82	253	253	3	254	65.61
MGYP000659196827	hypothetical protein PHYBLDRAFT_92267, partial	256	9.8e-16	hypothetical protein PHYBLDRAFT_92267, partial [Phycomyces blakesleeanus NRRL 1555(-)]	9.8e-16	246	134	31	163	58.96
MGYP000659569897	alpha/beta hydrolase	297	9.4E-195;2.7E-194;3.9E-150;4.5E-138;1.7E-134;5.1E-134;2.2E-130;3.5E-129;5.8E-129;2.7E-128;3.3E-128;4.4E-127;1.5E-125;1.5E-125;7.4E-125;1.7E-124;2.4E-123;2.8E-123;1.7E-122;4.6E-122	alpha/beta hydrolase [Undibacterium parvum]	9.4e-195	271	271	27	297	99.26
MGYP000660158210	lipase family protein	271	7.1E-33;1.0E-32;5.1E-29;3.8E-27;1.0E-23;1.0E-23;1.0E-23;1.5E-23;3.7E-23;3.7E-23;5.1E-23;5.1E-23;5.1E-23;1.7E-22;1.9E-22;2.1E-22;2.1E-22;2.1E-22;3.0E-22;3.6E-22	lipase family protein [Tetrahymena thermophila SB210]	7.1e-33	277	260	31	271	50.38
MGYP000660390328	lipase	222	7.0E-160;4.5E-86;4.4E-57;6.4E-55;1.9E-54;3.6E-54;3.6E-54;3.6E-54;1.1E-53;2.1E-53;4.2E-53;4.7E-53;4.7E-53;1.2E-52;1.2E-52;1.3E-52;1.3E-52;1.3E-52;1.3E-52;1.3E-52	lipase [Thecamonas trahens ATCC 50062]	7e-160	217	217	6	222	99.08
MGYP000662232151	3-oxoadipate enol-lactonase	263	1.7E-168;1.4E-167;4.4E-155;1.3E-154;8.1E-153;6.7E-152;1.9E-151;9.0E-150;9.7E-150;9.7E-150;1.3E-149;1.8E-149;1.8E-149;2.6E-149;5.2E-149;5.2E-149;5.2E-149;1.1E-148;2.3E-148;3.0E-148	3-oxoadipate enol-lactonase [Roseobacter sp. AzwK-3b]	1.7e-168	263	262	1	262	91.98
MGYP000662525173	alpha/beta fold hydrolase	312	3.8E-66;1.6E-65;5.5E-65;2.8E-64;3.4E-64;3.6E-64;7.8E-64;1.9E-63;8.7E-63;1.1E-62;2.5E-62;2.5E-62;5.0E-62;5.0E-62;5.3E-62;6.0E-62;7.6E-62;8.0E-62;1.2E-61;1.4E-61	alpha/beta fold hydrolase [Capillimicrobium parvum]	3.8e-66	294	280	16	294	61.07
MGYP000665026603	lipase	252	1.8E-82;9.8E-80;7.1E-79;2.0E-78;2.3E-77;3.8E-76;7.7E-76;1.1E-75;1.2E-75;1.8E-75;3.4E-74;8.1E-73;9.4E-71;1.4E-70;8.3E-70;1.5E-69;1.2E-68;3.4E-68;4.7E-68;9.4E-68	lipase [Limnobacter sp. SAORIC-690]	1.8e-82	395	250	4	252	72.4
MGYP000665056046	alpha/beta fold hydrolase	360	6.8E-35;1.7E-32;5.9E-31;8.4E-31;1.2E-30;1.6E-30;7.0E-30;1.2E-28;4.1E-28;1.3E-27;6.3E-26;2.7E-24;4.5E-24;4.9E-24;1.8E-23;7.4E-23;3.2E-22;1.6E-21;3.0E-21;3.0E-21	alpha/beta fold hydrolase [Tetrahymena thermophila SB210]	6.8e-35	393	326	26	339	50.61
MGYP000665462742	hypothetical protein	271	5.7e-40	hypothetical protein [Candidatus Saccharimonas aalborgensis]	5.7e-40	215	215	55	268	57.67
MGYP000665584941	lipase family protein	291	7.5E-49;3.5E-43;2.8E-26;9.1E-25;1.8E-24;2.2E-24;2.3E-24;2.5E-24;5.8E-24;6.2E-24;9.4E-24;1.3E-23;1.7E-23;8.7E-23;1.0E-22;1.3E-22;1.5E-22;1.7E-22;2.7E-22;3.2E-22	lipase family protein [Salibacter halophilus]	7.5e-49	286	261	5	265	55.17
MGYP000667864375	lipase family protein	321	1.8E-42;8.6E-41;1.8E-39;1.5E-37;1.7E-31;2.4E-29;4.9E-29;1.3E-27;5.9E-27;1.2E-26;2.3E-25;2.4E-25;6.1E-24;1.2E-23;2.2E-23;4.3E-23;6.0E-23;8.3E-23;2.2E-22;6.0E-22	lipase family protein [Mariprofundus sp. EBB-1]	1.8e-42	302	319	2	316	53.29
MGYP000668614048	alpha/beta fold hydrolase	226	8.6E-33;4.2E-32;6.6E-32;4.9E-31;2.7E-30;3.4E-30;4.5E-30;4.5E-30;4.6E-30;6.4E-30;7.5E-30;9.6E-30;1.6E-29;1.8E-29;3.5E-29;6.7E-29;6.8E-29;1.4E-28;2.4E-27;5.6E-27	alpha/beta fold hydrolase [Haloglomus sp. DT116]	8.6e-33	298	225	10	214	52.44
MGYP000668862952	alpha/beta fold hydrolase	270	6.7E-58;9.3E-57;2.1E-56;2.7E-50;2.5E-49;4.2E-49;5.0E-49;7.7E-49;8.3E-49;1.1E-48;1.2E-48;1.9E-48;2.6E-48;3.6E-48;6.2E-48;6.9E-48;6.9E-48;9.1E-48;2.1E-47;2.3E-47	alpha/beta fold hydrolase [Pseudonocardia sp.]	6.7e-58	329	214	47	260	64.02
MGYP000669046057	diacylglycerol lipase-beta-like	232	1.4E-39;2.4E-34;2.5E-34;3.0E-34;3.3E-34;7.4E-34;2.8E-33;4.5E-33;4.7E-33;7.1E-33;7.9E-33;9.7E-33;9.7E-33;1.5E-32;1.5E-32;1.5E-32;2.0E-32;2.0E-32;2.5E-32;2.8E-32	diacylglycerol lipase-beta-like [Tigriopus californicus]	1.4e-39	733	225	1	220	54.67
MGYP000671529352	hypothetical protein	221	7.9E-58;4.2E-55;4.7E-53;6.7E-50;1.4E-49;4.1E-49;3.6E-48;6.9E-48;4.1E-47;5.7E-47;1.1E-46;1.1E-46;2.0E-46;4.6E-46;4.6E-46;6.5E-46;3.9E-44;4.0E-43;1.6E-42;6.4E-42	hypothetical protein [Noviherbaspirillum sp.]	7.9e-58	216	171	35	205	73.68
MGYP000671541165	alpha/beta hydrolase	258	8.1E-91;1.4E-78;1.4E-72;2.6E-72;1.2E-71;8.5E-71;2.2E-70;2.2E-70;1.9E-69;7.4E-69;4.2E-68;4.7E-68;5.2E-68;1.0E-67;2.1E-67;4.5E-67;4.8E-67;9.0E-67;1.0E-65;5.6E-65	alpha/beta hydrolase [Acuticoccus mangrovi]	8.1e-91	285	250	9	257	72.8
MGYP000671568858	alpha/beta fold hydrolase	235	1.2E-143;9.1E-139;5.0E-136;1.0E-97;2.8E-96;3.9E-95;3.9E-89;9.0E-61;1.9E-59;3.7E-59;6.6E-59;6.6E-59;7.8E-59;9.3E-59;1.0E-58;1.1E-58;1.1E-58;1.1E-58;1.1E-58;1.6E-58	alpha/beta fold hydrolase [Niveispirillum cyanobacteriorum]	1.2e-143	276	235	1	235	91.49
MGYP000671765500	alpha/beta hydrolase	360	1.9E-140;1.3E-138;4.2E-137;5.9E-137;1.2E-136;1.2E-129;1.4E-128;1.1E-127;1.4E-123;1.9E-121;1.4E-120;3.8E-116;8.3E-113;1.2E-112;1.2E-112;1.7E-112;3.4E-112;6.8E-112;1.1E-110;2.5E-105	alpha/beta hydrolase [Candidatus Pelagibacter ubique]	1.9e-140	258	238	1	233	92.02
MGYP000673749988	alpha/beta hydrolase fold domain-containing protein	353	6.5E-127;5.3E-124;1.9E-123;4.0E-123;8.0E-123;5.4E-122;1.2E-121;1.6E-121;1.7E-121;4.7E-121;1.1E-120;1.4E-120;3.8E-120;1.0E-119;1.1E-119;1.4E-119;2.7E-119;3.8E-119;6.3E-119;9.1E-119	alpha/beta hydrolase fold domain-containing protein [Edaphobacter dinghuensis]	6.5e-127	367	348	10	353	70.4
MGYP000675182560	alpha/beta hydrolase	240	1.9E-165;7.6E-165;1.1E-164;6.3E-164;1.8E-163;6.9E-158;2.2E-157;2.8E-157;9.1E-157;3.7E-156;3.7E-156;7.5E-156;1.1E-155;3.0E-155;1.5E-154;1.5E-79;1.9E-77;1.1E-72;2.9E-72;9.2E-72	alpha/beta hydrolase [Phaeobacter inhibens]	1.9e-165	240	240	1	240	100
MGYP000677743274	alpha/beta hydrolase	326	1.9E-116;4.2E-67;1.0E-66;3.3E-66;1.4E-65;2.6E-65;7.7E-62;1.3E-59;2.0E-58;1.2E-56;3.8E-56;3.8E-49;4.5E-48;2.0E-47;4.5E-47;1.6E-46;1.4E-44;5.2E-44;5.4E-44;5.9E-43	alpha/beta hydrolase [Hymenobacter sp. UV11]	1.9e-116	345	327	1	326	72.78
MGYP000677795145	alpha/beta hydrolase	291	5.3E-47;2.1E-46;5.9E-46;1.7E-45;1.7E-45;1.8E-45;4.6E-45;4.6E-45;4.6E-45;6.5E-45;1.8E-44;1.8E-44;1.8E-44;1.8E-44;1.8E-44;2.6E-44;2.6E-44;3.6E-44;5.1E-44;1.1E-43	alpha/beta hydrolase [Leptotrichia hofstadii]	5.3e-47	291	264	20	278	57.2
MGYP000679918764	alpha/beta hydrolase	273	9.1E-203;4.9E-198;6.6E-196;2.6E-193;7.4E-193;2.3E-187;1.0E-183;1.5E-170;1.9E-169;7.2E-158;3.2E-145;1.0E-139;2.9E-139;7.0E-126;2.8E-125;4.0E-101;1.2E-95;1.9E-80;1.2E-78;1.1E-74	alpha/beta hydrolase [Paraglaciecola chathamensis]	9.1e-203	273	273	1	273	99.27
MGYP000679921511	3-oxoadipate enol-lactonase	279	1.5E-129;7.7E-129;1.2E-128;1.3E-128;4.0E-127;6.1E-127;2.3E-126;3.3E-126;9.4E-126;1.9E-125;3.8E-125;3.8E-125;7.7E-125;7.7E-125;7.7E-125;7.7E-125;1.1E-124;1.6E-124;1.7E-124;2.2E-124	3-oxoadipate enol-lactonase [Sulfitobacter sp. JL08]	1.5e-129	262	262	18	279	79.77
MGYP000680315565	alpha/beta hydrolase	287	2.1E-97;2.2E-91;7.8E-89;6.1E-82;1.0E-80;2.0E-79;4.1E-79;5.8E-78;1.1E-77;1.3E-77;1.9E-77;2.7E-77;2.7E-77;4.7E-77;4.8E-77;5.3E-77;5.6E-77;6.6E-77;4.7E-76;5.3E-76	alpha/beta hydrolase [Chlorogloeopsis sp. ULAP01]	2.1e-97	301	263	24	286	73
MGYP000680467977	lipase family protein	420	1.1E-298;6.1E-298;1.2E-297;1.8E-297;7.2E-297;2.9E-254;1.5E-197;2.5E-196;2.5E-196;2.6E-140;6.1E-132;1.8E-131;2.5E-131;2.5E-131;2.5E-131;2.5E-131;3.5E-131;3.5E-131;5.0E-131;5.0E-131	lipase family protein [Megamonas hypermegale]	1.1e-298	420	420	1	420	100
MGYP000680658087	alpha/beta hydrolase	327	1.1E-198;6.3E-196;2.5E-193;3.5E-193;4.9E-193;3.9E-190;5.2E-179;9.1E-166;2.1E-158;9.2E-158;2.2E-157;3.1E-157;3.1E-157;3.4E-157;3.3E-154;1.7E-153;5.7E-153;1.1E-152;6.7E-151;6.9E-151	alpha/beta hydrolase [Mycobacterium sp. 1245111.1]	1.1e-198	327	327	1	327	89.3
MGYP000680658733	alpha/beta hydrolase	289	3.5E-100;2.2E-98;4.7E-92;3.8E-91;1.9E-89;4.7E-87;6.7E-87;4.6E-85;8.0E-85;4.4E-84;7.3E-84;1.0E-81;2.9E-71;3.6E-70;2.8E-69;1.6E-68;5.8E-65;1.3E-64;2.2E-63;7.7E-63	alpha/beta hydrolase [Phenylobacterium sp.]	3.5e-100	316	282	18	286	68.44
MGYP000680803964	lipase family protein	285	9.4E-46;4.1E-44;1.6E-43;2.3E-43;2.5E-43;9.9E-42;1.0E-40;2.8E-40;1.2E-39;1.8E-39;5.4E-25;2.4E-24;5.7E-19;6.1E-19;6.3E-19;2.3E-18;2.3E-18;3.3E-18;4.5E-18;7.5E-18	lipase family protein [Colwellia demingiae]	9.4e-46	277	273	15	283	55.31
MGYP000680848518	lipase family protein	174	9.8E-57;4.3E-48;7.0E-47;1.9E-46;9.6E-44;1.3E-43;7.6E-43;8.4E-40;4.7E-39;6.3E-39;6.5E-39;1.2E-38;1.9E-38;5.0E-38;5.4E-38;6.6E-38;7.5E-38;7.5E-38;7.9E-38;9.3E-38	lipase family protein [Romeria gracilis]	9.8e-57	264	150	1	150	71.33
MGYP000681721936	alpha/beta hydrolase fold domain-containing protein	285	5.9E-32;1.7E-31;4.7E-31;4.7E-31;6.6E-31;1.8E-30;2.5E-30;2.5E-30;3.6E-30;5.0E-30;5.0E-30;7.0E-30;1.2E-29;1.4E-29;2.3E-29;3.7E-29;4.7E-29;6.4E-29;1.4E-27;1.9E-26	alpha/beta hydrolase fold domain-containing protein [Hominilimicola fabiformis]	5.9e-32	293	255	14	266	51.76
MGYP000683349349	lipase family protein	175	4.8E-17;9.9E-17;2.6E-16;4.6E-16	lipase family protein [Nodosilinea sp. TSF1-S3]	4.8e-17	245	184	4	174	50.54
MGYP000683689367	MULTISPECIES: alpha/beta hydrolase	265	3.5E-187;8.9E-181;9.6E-159;3.6E-73;2.0E-66;9.2E-64;1.8E-63;1.5E-62;1.2E-61;3.5E-61;5.0E-61;7.1E-61;7.1E-61;8.1E-60;8.1E-60;1.0E-59;1.1E-59;3.2E-59;6.7E-59;6.7E-59	MULTISPECIES: alpha/beta hydrolase [Eubacteriales]	3.5e-187	265	265	1	265	100
MGYP000683809908	hypothetical protein	411	8.4E-118;1.0E-115;2.1E-115;1.1E-114;1.2E-111;5.1E-109;9.9E-106;2.1E-104;1.6E-103;5.5E-99;1.3E-98;1.4E-97;9.3E-91;1.1E-89;2.6E-87;8.1E-30	hypothetical protein [Halioglobus sp. HI00S01]	8.4e-118	730	348	62	406	67.82
MGYP000685484688	esterase/lipase	258	1.8E-74;7.1E-57;1.1E-55;2.6E-55;1.2E-52;1.3E-52;4.3E-52;6.0E-52;6.2E-52;1.1E-51;1.8E-51;1.8E-50;2.7E-50;3.2E-50;3.8E-50;5.8E-50;7.0E-50;8.2E-50;8.2E-50;8.6E-50	esterase/lipase [Ostreococcus lucimarinus virus 1]	1.8e-74	252	207	10	213	69.57
MGYP000686301374	alpha/beta fold hydrolase	249	1.4E-32;5.2E-31;1.5E-30;2.1E-30;4.0E-30;4.1E-30;1.1E-29;2.2E-29;2.2E-29;1.7E-28;1.0E-27;1.4E-27;1.9E-27;3.7E-27;4.8E-27;4.8E-27;7.2E-27;7.2E-27;1.0E-26;1.0E-26	alpha/beta fold hydrolase [Selenobaculum gbiensis]	1.4e-32	234	229	8	234	54.59
MGYP000686758925	alpha/beta-hydrolase	163	5.8E-42;4.8E-37;4.4E-36;8.4E-32;1.2E-31;5.1E-31;3.5E-30;9.3E-30;1.2E-29;9.1E-29;2.5E-28;3.5E-28;1.3E-27;2.2E-27;8.0E-27;2.7E-26;2.3E-25;2.1E-24;2.3E-24;1.8E-23	alpha/beta-hydrolase [Coccomyxa subellipsoidea C-169]	5.8e-42	471	159	3	157	67.3
MGYP000686759509	lipase family protein	298	8.3E-198;1.8E-71;5.7E-70;8.0E-70;9.7E-69;2.3E-66;2.6E-66;2.3E-65;9.4E-64;5.7E-61;5.3E-57;3.0E-54;2.9E-51;4.6E-51;3.0E-46;5.7E-45;1.7E-44;4.6E-44;1.3E-43;1.8E-43	lipase family protein [Pleurocapsa sp. PCC 7319]	8.3e-198	298	298	1	298	95.97
MGYP000686987407	lipase family protein	281	1.0E-70;4.6E-46;7.8E-16	lipase family protein [Pelagibius sp. Alg239-R121]	1e-70	291	287	9	281	59.93
MGYP000688444431	lipase family protein	316	1.0E-46;1.3E-45;6.0E-45;6.9E-45;1.7E-44;1.2E-43;1.2E-43;1.8E-43;6.6E-43;2.2E-42;3.9E-42;3.9E-42;4.0E-42;4.0E-42;5.5E-42;1.2E-41;1.5E-41;2.9E-41;4.1E-41;5.8E-41	lipase family protein [Paenibacillus sp. N3.4]	1e-46	262	260	35	293	55.38
MGYP000689510533	lipase	338	1.0E-225;3.3E-180;7.2E-145;8.3E-145;2.5E-141;3.6E-141;5.1E-141;1.4E-140;5.8E-140;1.2E-139;1.9E-138;6.4E-137;5.3E-132;3.4E-131;4.5E-131;5.2E-130;7.3E-130;2.1E-129;1.1E-127;1.3E-126	lipase [Pseudonocardia sp.]	1e-225	338	338	1	338	94.08
MGYP000689848998	MULTISPECIES: radical SAM protein	465	2.7E-138;9.0E-134;3.5E-124;1.2E-123;2.2E-117;4.1E-117;1.2E-116;4.6E-116;4.6E-116;4.6E-116;4.6E-116;7.0E-116;1.0E-114;8.9E-114;4.9E-113;6.0E-111;1.5E-109;5.0E-109;7.0E-109;9.5E-109	MULTISPECIES: radical SAM protein [Petrotoga]	2.7e-138	463	448	1	445	65.4
MGYP000689947688	alpha/beta fold hydrolase	198	2.8E-114;7.6E-43;1.1E-41;2.0E-41;8.7E-41;3.4E-40;5.3E-40;7.5E-40;8.0E-40;9.3E-40;9.6E-40;1.3E-39;1.6E-39;2.0E-39;4.2E-39;4.3E-39;5.2E-39;5.2E-39;6.8E-39;1.0E-38	alpha/beta fold hydrolase [Alkalimarinus coralli]	2.8e-114	329	193	1	193	91.71
MGYP000692107340	lipase family protein	153	1.8E-21;3.6E-20;2.7E-19;3.5E-19;7.9E-19;1.0E-18;1.1E-18;3.1E-18;3.9E-17;4.5E-17;4.8E-17;2.3E-16;3.7E-16	lipase family protein [Halalkalibacter krulwichiae]	1.8e-21	241	145	6	149	53.79
MGYP000692189251	alpha/beta fold hydrolase	196	5.3E-49;1.2E-48;7.0E-48;1.3E-47;4.3E-47;7.8E-47;4.6E-46;5.0E-45;6.4E-45;9.3E-45;1.5E-44;2.0E-44;3.8E-44;1.0E-43;1.2E-42;2.3E-42;2.5E-42;2.6E-42;2.6E-42;3.1E-42	alpha/beta fold hydrolase [Pyxidicoccus xibeiensis]	5.3e-49	215	190	3	192	61.05
MGYP000692789469	alpha/beta hydrolase	265	9.4E-48;1.5E-44;1.1E-42;2.3E-42;3.9E-42;1.4E-41;3.1E-41;5.6E-41;4.4E-40;4.5E-40;1.4E-39;2.5E-39;2.0E-38;2.4E-38;3.7E-38;5.5E-38;6.6E-38;1.1E-37;2.0E-37;2.4E-37	alpha/beta hydrolase [Candidatus Nitrososphaera gargensis]	9.4e-48	270	259	10	264	59.46
MGYP000694401523	lipase family protein	176	8.8E-22;3.4E-21;4.7E-21;1.9E-20;2.6E-20;5.0E-20;2.7E-19;3.7E-19;7.4E-19;1.0E-18;1.0E-18;2.8E-18	lipase family protein [Mycobacterium xenopi]	8.8e-22	254	181	1	159	50.28
MGYP000695201698	alpha/beta hydrolase	261	2.2E-113;6.7E-108;2.7E-107;4.8E-100;2.8E-92;4.0E-92;4.0E-92;6.5E-91;9.2E-91;2.6E-90;1.5E-89;1.8E-89;1.8E-89;5.2E-89;5.2E-89;5.2E-89;5.2E-89;5.2E-89;7.4E-89;7.4E-89	alpha/beta hydrolase [Pectinatus frisingensis]	2.2e-113	275	254	1	254	76.77
MGYP000697261960	alpha/beta fold hydrolase	269	5.5E-88;6.2E-40;1.2E-39;1.2E-39;2.3E-36;1.7E-35;1.8E-35;1.8E-35;3.1E-34;3.9E-34;2.0E-32;2.1E-32;1.5E-29;2.8E-29;3.0E-28;2.4E-27;3.3E-27;3.3E-27;8.2E-27;2.2E-25	alpha/beta fold hydrolase [Desulfatiglans anilini]	5.5e-88	269	269	1	269	62.08
MGYP000697299013	alpha/beta hydrolase	265	2.3E-67;1.9E-66;2.1E-65;4.4E-65;1.7E-64;2.4E-64;2.5E-64;3.4E-64;3.4E-64;7.1E-64;1.0E-63;2.0E-63;2.8E-63;6.9E-63;7.8E-63;7.8E-63;7.8E-63;7.8E-63;8.0E-63;1.1E-62	alpha/beta hydrolase [Variovorax sp. J22R187]	2.3e-67	266	263	5	262	60.08
MGYP000697547356	alpha/beta hydrolase	294	6.0E-77;6.9E-66;6.0E-48;1.7E-47;2.4E-47;1.0E-46;4.6E-44;9.4E-44;1.3E-43;6.2E-43;7.8E-42;2.7E-41;1.5E-40;3.9E-39;1.1E-38;9.1E-38;1.2E-37;1.6E-37;3.8E-37;1.8E-36	alpha/beta hydrolase [Leptolyngbya sp. 7M]	6e-77	284	264	32	293	64.39
MGYP000697913565	lipase family protein	290	8.9E-92;3.7E-89;3.7E-89;5.2E-89;7.4E-89;1.5E-88;2.1E-88;6.0E-88;1.1E-87;1.2E-87;8.0E-87;1.3E-86;1.9E-86;2.0E-86;2.1E-86;4.9E-85;4.7E-84;1.9E-83;3.8E-83;3.8E-83	lipase family protein [Marinobacterium arenosum]	8.9e-92	267	261	30	289	68.97
MGYP000700154653	alpha/beta hydrolase	243	3.1E-60;1.2E-57;1.8E-54;1.8E-54;1.2E-53;8.0E-53;9.9E-52;6.3E-51;1.1E-50;1.1E-50;4.9E-50;6.0E-50;2.9E-49;6.9E-49;1.6E-48;1.7E-48;2.0E-48;2.1E-48;4.1E-48;8.0E-48	alpha/beta hydrolase [uncultured Desulfobacter sp.]	3.1e-60	237	233	5	237	59.66
MGYP000700284368	alpha/beta fold hydrolase	277	3.8E-89;4.2E-86;2.9E-84;5.5E-84;3.6E-83;5.1E-83;5.1E-83;5.1E-83;7.2E-83;7.2E-83;7.2E-83;7.2E-83;9.8E-83;1.0E-82;1.0E-82;1.0E-82;1.4E-82;1.4E-82;1.4E-82;2.0E-82	alpha/beta fold hydrolase [Rhodocaloribacter litoris]	3.8e-89	285	270	5	274	67.41
MGYP000700624443	uncharacterized protein MONBRDRAFT_38123	258	3.9E-36;1.5E-35;5.3E-34;5.7E-33;4.4E-32;1.7E-31;2.5E-31;4.9E-31;5.7E-31;8.0E-31;1.0E-30;3.4E-29;5.8E-29;3.3E-28;1.5E-26;5.1E-26;5.1E-26;7.8E-26;1.1E-25;1.9E-25	uncharacterized protein MONBRDRAFT_38123 [Monosiga brevicollis MX1]	3.9e-36	277	267	21	258	52.81
MGYP000701451217	lipase family protein	313	1.0E-155;2.5E-145;1.2E-94;1.2E-93;8.2E-90;1.0E-69;1.0E-69;1.5E-69;1.7E-69;3.0E-69;4.3E-67;9.3E-67;1.4E-65;1.5E-64;5.0E-63;2.0E-62;9.5E-62;1.2E-59;9.3E-58;3.1E-57	lipase family protein [Hongsoonwoonella zoysiae]	1e-155	305	293	21	313	86.35
MGYP000701754657	lipase	262	3.0E-95;5.3E-90;1.2E-72;1.7E-62;1.1E-61;3.0E-52;5.9E-52;8.2E-52;2.8E-51;3.7E-51;1.9E-50;2.0E-50;3.6E-50;3.6E-50;1.3E-49;2.6E-49;2.9E-49;4.8E-49;6.9E-49;7.4E-49	lipase [Micromonas commoda]	3e-95	1182	206	18	222	83.98
MGYP000703100924	alpha/beta hydrolase	262	6.4E-96;9.1E-96;1.4E-95;2.5E-95;2.5E-95;3.1E-95;3.6E-95;5.1E-95;1.2E-94;5.0E-94;6.9E-94;6.9E-94;1.5E-89;2.5E-89;3.0E-89;2.4E-88;4.9E-88;9.1E-88;1.4E-87;3.6E-87	alpha/beta hydrolase [Oscillochloris trichoides]	6.4e-96	274	260	1	260	71.92
MGYP000703233520	alpha/beta fold hydrolase	268	8.3E-76;7.4E-71;2.5E-65;2.5E-63;2.4E-59;1.4E-54;4.3E-53;5.7E-53;2.5E-51;2.5E-51;7.2E-51;1.2E-50;2.9E-50;3.7E-50;1.3E-49;1.5E-49;2.0E-49;2.5E-49;2.9E-49;4.2E-49	alpha/beta fold hydrolase [Candidatus Entotheonella palauensis]	8.3e-76	264	250	10	255	68
MGYP000703403490	lipase	304	3.7E-93;7.4E-93;1.7E-92;3.0E-92;6.0E-92;7.5E-92;8.5E-92;1.2E-91;1.4E-91;1.7E-91;1.7E-91;2.4E-91;2.4E-91;3.3E-91;3.4E-91;3.4E-91;4.8E-91;9.7E-91;2.7E-90;2.8E-90	lipase [Amycolatopsis sp. QT-25]	3.7e-93	314	290	5	293	65.17
MGYP000703514801	MULTISPECIES: lipase family protein	329	1.3E-126;7.0E-124;4.7E-31	MULTISPECIES: lipase family protein [Cysteiniphilum]	1.3e-126	311	311	1	311	76.53
MGYP000703787875	predicted protein	265	4.9e-73	predicted protein [Phaeodactylum tricornutum CCAP 1055/1]	4.9e-73	546	239	27	265	64.85
MGYP000704684236	alpha/beta hydrolase	266	1.2E-144;5.6E-144;1.9E-142;1.8E-135;2.3E-128;3.8E-127;8.1E-122;6.6E-121;1.7E-119;4.8E-119;9.3E-119;1.4E-118;1.9E-118;5.5E-118;6.4E-117;9.1E-117;1.3E-116;7.4E-116;2.1E-115;8.5E-115	alpha/beta hydrolase [Colwellia sp. 20A7]	1.2e-144	266	266	1	266	86.09
MGYP000706130266	lipase family protein	242	3.4E-54;1.7E-53;2.2E-53;2.6E-53;3.1E-53;4.1E-53;1.3E-52;1.6E-52;2.0E-52;2.1E-52;2.6E-52;3.0E-52;3.0E-52;3.5E-52;5.2E-52;1.2E-51;1.2E-51;1.2E-51;1.2E-51;1.7E-51	lipase family protein [Rubripirellula lacrimiformis]	3.4e-54	323	238	8	237	58.82
MGYP000709414770	lipase ZK262.3-like	391	2.2E-79;7.7E-74;2.3E-73;7.3E-71;3.2E-67;6.5E-67;7.7E-67;9.3E-67;3.3E-64;1.3E-63;1.0E-61;2.9E-61;8.0E-61;3.3E-60;6.2E-60;8.8E-60;8.8E-60;4.7E-59;7.2E-58;6.3E-57	lipase ZK262.3-like [Mercenaria mercenaria]	2.2e-79	452	400	8	388	54.5
MGYP000709816609	MULTISPECIES: alpha/beta fold hydrolase	203	5.4E-45;3.9E-44;2.5E-43;5.9E-43;1.5E-42;2.2E-42;1.7E-41;2.2E-40;2.4E-40;3.1E-40;3.2E-40;2.3E-39;3.7E-39;4.1E-39;4.1E-39;5.1E-39;5.3E-39;5.8E-39;8.7E-39;9.2E-39	MULTISPECIES: alpha/beta fold hydrolase [unclassified Lentimonas]	5.4e-45	190	187	10	195	60.43
MGYP000710457204	uncharacterized protein GSPATT00037943001	187	1.7E-23;5.1E-23;5.1E-23;6.8E-23;6.8E-23;9.7E-23;1.8E-22;3.5E-22;9.2E-22;2.0E-21;4.7E-21;5.0E-21;6.6E-21;6.8E-21;7.6E-21;2.4E-20;2.9E-20;4.0E-20;1.6E-19;1.6E-19	uncharacterized protein GSPATT00037943001 [Paramecium tetraurelia]	1.7e-23	295	149	31	178	55.7
MGYP000710689037	lipase family protein	279	4.3E-195;1.2E-146;1.7E-142;4.1E-141;1.4E-139;2.2E-138;2.6E-137;1.0E-136;1.1E-136;7.1E-135;4.6E-132;5.9E-107;1.4E-106;4.8E-104;5.9E-104;8.4E-104;1.1E-103;2.4E-103;5.5E-103;6.8E-103	lipase family protein [Saccharopolyspora rosea]	4.3e-195	279	279	1	279	97.85
MGYP000712813175	lipase family protein	210	6.1E-98;1.9E-95;1.8E-93;2.0E-92;2.1E-92;2.2E-92;2.2E-92;3.0E-92;8.7E-92;8.7E-92;2.3E-91;3.3E-91;3.4E-91;4.7E-91;1.0E-90;1.3E-90;1.3E-90;1.9E-90;2.8E-90;4.0E-90	lipase family protein [Pseudanabaena sp. PCC 6802]	6.1e-98	278	211	1	204	80.09
MGYP000715173665	alpha/beta hydrolase	257	1.0E-41;4.1E-41;1.8E-40;1.1E-39;2.0E-39;2.8E-39;3.7E-39;5.1E-39;2.6E-38;5.4E-38;1.0E-37;3.0E-37;4.3E-37;1.2E-36;1.3E-36;2.3E-36;3.1E-36;4.0E-36;4.5E-36;5.5E-36	alpha/beta hydrolase [Neobacillus endophyticus]	1e-41	298	254	1	244	53.94
MGYP000715590179	predicted protein	177	3.5E-39;2.1E-38	predicted protein [Thalassiosira pseudonana CCMP1335]	3.5e-39	370	203	2	177	57.14
MGYP000718148542	alpha/beta fold hydrolase	252	1.3E-155;2.5E-130;2.5E-130;5.0E-130;2.4E-128;1.5E-126;3.1E-126;4.4E-126;1.6E-104;2.3E-101;1.7E-99;4.5E-97;5.2E-97;7.6E-90;6.1E-50;1.0E-17;1.5E-17;2.1E-17;4.0E-17;6.3E-17	alpha/beta fold hydrolase [Nannocystis sp.]	1.3e-155	251	246	5	250	95.53
MGYP000718307736	lipase family protein	181	2.3E-26;9.4E-25;5.0E-22;6.0E-22;7.6E-22;8.1E-22;1.4E-21;1.8E-21;2.0E-21;2.3E-21;2.5E-21;2.5E-21;2.8E-21;2.8E-21;3.0E-21;3.5E-21;3.8E-21;3.8E-21;4.6E-21;7.2E-21	lipase family protein [Tetrahymena thermophila SB210]	2.3e-26	277	168	13	175	55.36
MGYP000718654478	alpha/beta fold hydrolase	184	1.4E-52;1.4E-51;2.4E-51;1.3E-50;1.3E-49;1.4E-49;1.4E-49;7.1E-49;1.1E-48;1.4E-48;2.1E-48;2.2E-48;2.2E-48;3.1E-48;3.1E-48;6.2E-48;8.7E-48;1.2E-47;1.2E-47;1.3E-47	alpha/beta fold hydrolase [Actinophytocola sp.]	1.4e-52	234	169	16	184	68.05
MGYP000719315234	hypothetical protein	295	8.9E-36;1.9E-31;2.1E-31;2.1E-31;3.8E-30;4.4E-30;5.4E-30;1.1E-29;1.1E-29;1.2E-28;7.3E-28;8.8E-28;8.8E-28;1.2E-27;1.2E-27;1.2E-27;2.6E-27;4.6E-27;4.6E-27;6.4E-27	hypothetical protein [Anaerosporomusa subterranea]	8.9e-36	282	257	45	287	53.31
MGYP000719503373	hypothetical protein	223	9.7E-132;4.3E-35;2.2E-24	hypothetical protein [uncultured Treponema sp.]	9.7e-132	212	209	15	223	90.91
MGYP000720837122	alpha/beta fold hydrolase	460	1.2E-161;2.6E-122;1.8E-121;2.0E-121;5.7E-121;2.7E-117;7.8E-117;2.9E-116;3.4E-116;2.0E-115;2.8E-115;3.6E-115;7.5E-115;7.5E-115;1.6E-114;1.6E-114;1.7E-114;2.3E-114;2.3E-114;6.4E-114	alpha/beta fold hydrolase [Candidatus Solincola tengchongensis]	1.2e-161	466	451	15	452	71.4
MGYP000720933088	alpha/beta hydrolase	256	2.7E-65;5.0E-65;1.6E-63;3.3E-63;6.9E-63;2.9E-61;2.9E-61;1.1E-55;2.2E-55;4.4E-55;1.7E-54;2.5E-54;1.8E-25;5.3E-24;1.1E-23;1.7E-23;2.6E-23;5.5E-23;7.1E-23;8.0E-23	alpha/beta hydrolase [Bdellovibrio bacteriovorus]	2.7e-65	261	247	11	255	62.75
MGYP000721580438	alpha/beta-hydrolase	173	7.3E-29;3.3E-28;3.4E-28;3.8E-28;6.4E-28;6.5E-28;8.0E-28;9.1E-28;9.1E-28;1.1E-27;1.1E-27;1.9E-27;2.1E-27;2.1E-27;2.1E-27;2.3E-27;2.4E-27;2.5E-27;2.5E-27;2.5E-27	alpha/beta-hydrolase [Coccomyxa subellipsoidea C-169]	7.3e-29	326	164	10	173	60.37
MGYP000721593547	alpha/beta fold hydrolase	213	5.0E-78;3.2E-76;4.7E-74;1.7E-71;2.0E-67;2.2E-66;1.0E-65;1.4E-65;1.4E-65;2.0E-65;4.5E-65;5.1E-65;1.1E-64;1.1E-64;1.6E-64;2.1E-64;4.1E-64;4.1E-64;5.9E-64;5.9E-64	alpha/beta fold hydrolase [Candidatus Solirubrobacter pratensis]	5e-78	255	202	1	200	72.77
MGYP000721702126	MULTISPECIES: alpha/beta fold hydrolase	309	2.6E-227;1.3E-218;1.8E-218;2.6E-218;3.6E-218;5.1E-218;1.0E-217;1.0E-217;1.0E-217;1.5E-217;4.9E-216;4.1E-215;6.3E-215;1.6E-214;1.6E-214;1.6E-214;4.7E-214;6.7E-214;1.4E-213;1.9E-213	MULTISPECIES: alpha/beta fold hydrolase [unclassified Herbaspirillum]	2.6e-227	309	309	1	309	100
MGYP000722342167	alpha/beta hydrolase	306	1.1E-176;1.5E-174;6.1E-174;1.9E-170;5.3E-168;7.5E-168;4.1E-165;5.8E-165;1.7E-164;2.4E-164;2.4E-164;3.4E-164;1.4E-163;3.9E-163;1.1E-162;1.1E-162;2.3E-162;2.3E-162;4.6E-162;9.2E-162	alpha/beta hydrolase [Erythrobacter sp. AP23]	1.1e-176	305	306	1	306	91.18
MGYP000724643509	alpha/beta hydrolase	242	8.3E-73;9.8E-71;9.9E-69;7.0E-68;1.5E-60;1.3E-59;3.2E-55;2.0E-54;1.2E-48;1.2E-47;1.9E-45;2.9E-45;3.0E-45;4.3E-45;5.4E-45;6.4E-45;2.4E-44;2.2E-43;3.9E-43;2.9E-42	alpha/beta hydrolase [Azohydromonas australica]	8.3e-73	292	235	7	241	67.23
MGYP000725333020	hypothetical protein	204	1.5E-151;8.6E-73	hypothetical protein [uncultured Paraglaciecola sp.]	1.5e-151	204	204	1	204	100
MGYP000726774426	alpha/beta fold hydrolase	262	9.4E-60;2.8E-45;8.6E-45;7.4E-44;2.7E-42;7.0E-42;5.3E-41;1.0E-40;1.3E-40;1.4E-39;7.3E-39;1.1E-38;2.2E-38;2.3E-38;7.9E-38;8.2E-38;2.5E-37;2.5E-37;2.5E-37;4.3E-37	alpha/beta fold hydrolase [Tsuneonella dongtanensis]	9.4e-60	298	262	2	261	56.87
MGYP000726823988	hypothetical protein	382	4.6E-48;7.4E-47;5.4E-35;6.6E-32;3.4E-31;2.8E-16	hypothetical protein [Aphanothece sacrum]	4.6e-48	374	370	31	374	50
MGYP000727872795	alpha/beta hydrolase	281	1.8E-77;4.0E-75;4.6E-74;2.6E-73;2.6E-73;6.7E-73;2.1E-72;2.2E-72;8.4E-72;8.4E-72;1.7E-71;2.4E-71;6.8E-71;7.2E-71;1.4E-70;2.7E-70;7.7E-70;9.0E-70;1.5E-69;2.2E-69	alpha/beta hydrolase [Novispirillum itersonii]	1.8e-77	304	268	7	270	63.43
MGYP000728228187	predicted protein	298	3.3E-37;1.6E-22;2.6E-18;5.1E-17;5.1E-17;1.3E-16;1.3E-16;1.3E-16;1.3E-16;9.3E-16	predicted protein [Thalassiosira pseudonana CCMP1335]	3.3e-37	1638	269	7	225	52.04
MGYP000728263534	alpha/beta hydrolase	295	1.7E-152;2.5E-151;7.2E-151;5.1E-149;5.3E-146;6.3E-146;5.6E-137;6.7E-136;1.9E-135;5.5E-135;4.5E-134;6.4E-134;9.0E-134;9.7E-134;1.8E-133;2.6E-133;9.7E-133;1.1E-132;2.0E-132;2.8E-132	alpha/beta hydrolase [Tenacibaculum soleae]	1.7e-152	296	295	1	295	84.07
MGYP000728306001	alpha/beta hydrolase	264	4.3E-110;7.2E-93;1.0E-92;2.9E-92;6.7E-91;1.0E-88;3.6E-88;7.9E-88;2.2E-86;1.3E-85;6.1E-84;3.1E-82;5.5E-80;7.1E-80;1.7E-78;1.2E-75;1.7E-75;6.0E-47;2.1E-46;1.7E-44	alpha/beta hydrolase [Aquisphaera insulae]	4.3e-110	268	246	11	256	76.83
MGYP000728310095	alpha/beta hydrolase	276	2.8E-106;2.0E-93;2.0E-93;5.5E-93;8.3E-93;8.9E-92;3.6E-91;1.5E-90;3.9E-90;4.0E-90;5.9E-90;1.2E-89;2.4E-89;2.4E-89;9.6E-89;1.4E-88;1.4E-88;1.9E-88;2.7E-88;2.7E-88	alpha/beta hydrolase [Xianfuyuplasma coldseepsis]	2.8e-106	276	270	1	270	74.81
MGYP000729702871	lipase family protein	177	4.7E-52;4.5E-49;1.2E-48;2.9E-47;4.0E-47;1.2E-46;2.3E-46;3.4E-46;6.7E-46;6.7E-46;7.1E-46;9.2E-46;9.2E-46;9.4E-46;9.7E-46;1.3E-45;1.4E-45;1.8E-45;1.8E-45;1.9E-45	lipase family protein [Variovorax sp. JS1663]	4.7e-52	284	179	1	177	72.63
MGYP000729775572	hypothetical protein	276	4.7E-140;1.1E-136;1.5E-136;6.6E-100;1.9E-98;6.0E-97;2.4E-96;3.8E-95;5.4E-95;2.3E-94;3.0E-94;4.2E-94;6.1E-94;8.5E-94;1.2E-93;1.2E-93;1.2E-93;1.2E-93;3.4E-93;4.6E-93	hypothetical protein [Caproiciproducens faecalis]	4.7e-140	275	268	8	275	82.84
MGYP000730977339	palmitoyl-protein thioesterase 3	272	2.5E-27;9.8E-26;2.7E-25;7.7E-25;8.1E-24;1.2E-23;2.4E-18;2.8E-18;1.9E-16;2.1E-16;7.3E-16	palmitoyl-protein thioesterase 3 [Dictyostelium discoideum AX4]	2.5e-27	289	254	20	255	51.18
MGYP000731211038	alpha/beta fold hydrolase	453	7.1E-87;9.1E-85;2.5E-83;1.5E-81;3.5E-81;7.2E-80;1.3E-79;1.0E-78;2.5E-77;5.9E-77;2.3E-76;4.9E-76;5.9E-75;9.5E-75;9.6E-75;2.1E-74;3.6E-74;5.1E-74;5.2E-74;1.0E-73	alpha/beta fold hydrolase [Neptunomonas phycophila]	7.1e-87	418	404	45	446	58.91
MGYP000733396301	alpha/beta hydrolase	319	2.1E-112;3.9E-112;6.1E-112;1.6E-111;2.2E-111;3.2E-111;4.0E-111;4.3E-111;6.4E-111;1.9E-110;2.0E-110;2.6E-110;7.4E-110;7.9E-110;1.5E-109;1.9E-109;3.1E-109;5.3E-109;6.8E-109;1.1E-108	alpha/beta hydrolase [Mycobacterium sp. 1423905.2]	2.1e-112	319	292	23	312	73.29
MGYP000733401442	lipase family protein	194	1.3E-45;3.8E-45;4.2E-45;2.1E-44;4.7E-44;2.8E-43;5.1E-43;1.5E-42;4.2E-42;1.1E-41;1.2E-41;1.2E-40;3.7E-36;1.2E-35;3.6E-34;9.4E-34;2.4E-33;1.2E-30;4.8E-29;1.0E-28	lipase family protein [Vibrio sp. TH_r3]	1.3e-45	272	203	2	194	58.62
MGYP000733931886	alpha/beta hydrolase	159	4.7E-35;7.9E-32;2.1E-31;5.9E-31;1.1E-30;1.1E-30;2.6E-30;4.2E-30;4.9E-30;5.3E-30;1.3E-29;1.7E-29;2.3E-29;2.3E-29;2.5E-29;2.5E-29;3.8E-29;3.9E-29;4.4E-29;4.5E-29	alpha/beta hydrolase [Actinophytocola sp.]	4.7e-35	245	132	21	152	68.94
MGYP000733967637	alpha/beta hydrolase	312	9.0E-110;6.7E-35;1.8E-34;3.1E-34;4.4E-34;8.5E-34;8.5E-34;2.9E-33;1.7E-32;2.9E-32;7.1E-32;2.0E-31;2.7E-31;2.7E-30;7.0E-30;6.3E-29;8.0E-29;9.7E-29;3.2E-28;3.4E-28	alpha/beta hydrolase [Candidatus Phaeomarinobacter ectocarpi]	9e-110	309	287	22	308	73.52
MGYP000734087836	3-oxoadipate enol-lactonase	257	8.0E-180;3.7E-117;3.7E-117;9.5E-117;1.5E-115;2.1E-115;3.0E-115;5.9E-115;6.3E-115;8.4E-115;1.3E-114;3.4E-114;3.6E-114;4.8E-114;5.2E-114;7.3E-114;9.7E-114;2.8E-113;2.8E-113;3.0E-113	3-oxoadipate enol-lactonase [Barrientosiimonas humi]	8e-180	257	257	1	257	100
MGYP000735580470	alpha/beta hydrolase	280	4.9E-77;2.1E-76;4.6E-76;3.4E-74;1.7E-73;3.4E-72;5.8E-72;6.4E-72;1.1E-71;1.9E-71;2.3E-71;6.2E-71;6.4E-71;9.1E-71;1.8E-70;2.2E-70;6.5E-70;9.0E-70;3.6E-69;3.8E-69	alpha/beta hydrolase [Tumidithrix elongata]	4.9e-77	293	263	15	277	62.36
MGYP000735693600	lipase family protein	295	1.5E-60;1.7E-55;1.9E-54;4.7E-54;1.3E-47;1.1E-45;1.8E-45;1.5E-44;5.4E-44;9.0E-42;7.3E-39;7.3E-39;7.3E-39;3.2E-35;5.6E-35;1.1E-34;4.4E-33;1.7E-28;3.3E-28;3.5E-28	lipase family protein [Caulobacter ginsengisoli]	1.5e-60	292	299	1	294	55.52
MGYP000735711518	alpha/beta hydrolase fold domain-containing protein	347	1.4E-139;2.0E-139;2.1E-139;3.7E-137;8.6E-136;1.3E-135;6.3E-135;1.8E-134;1.2E-131;2.4E-130;6.7E-130;1.7E-125;1.2E-122;3.9E-117;3.9E-116;2.6E-115;3.7E-115;3.8E-115;7.5E-111;7.5E-52	alpha/beta hydrolase fold domain-containing protein [Phenylobacterium sp.]	1.4e-139	349	289	59	347	82.7
MGYP000738570297	alpha/beta hydrolase	275	1.1E-138;2.0E-138;6.8E-137;1.5E-132;3.9E-130;5.5E-130;3.0E-125;1.7E-124;6.9E-124;2.4E-123;3.9E-122;1.1E-116;1.1E-116;1.6E-116;9.1E-116;2.3E-114;2.6E-113;8.0E-113;3.2E-112;4.1E-112	alpha/beta hydrolase [Oscillochloris sp. ZM17-4]	1.1e-138	277	258	1	258	86.05
MGYP000738809561	alpha/beta hydrolase	257	5.9E-80;7.1E-79;1.9E-77;4.5E-76;4.6E-75;1.5E-74;3.5E-74;4.3E-73;4.3E-73;9.2E-73;1.9E-72;3.0E-72;5.3E-72;1.1E-71;2.2E-70;1.4E-69;5.2E-69;1.4E-68;2.5E-68;1.0E-67	alpha/beta hydrolase [Fulvivirga aurantia]	5.9e-80	261	251	7	252	65.74
MGYP000739380493	alpha/beta fold hydrolase	195	2.1E-38;3.0E-38;8.4E-38;6.2E-37;1.8E-36;3.7E-36;9.0E-36;2.4E-35;1.6E-34;2.3E-34;4.0E-34;4.5E-34;1.5E-33;2.3E-33;2.3E-33;6.9E-33;1.2E-32;1.5E-31;9.1E-31;4.4E-30	alpha/beta fold hydrolase [Haladaptatus halobius]	2.1e-38	246	178	4	175	62.92
MGYP000739631673	lipase	244	3.7E-29;2.7E-24;2.3E-23;1.4E-22;2.0E-22;8.7E-22;9.3E-22;3.1E-21;4.7E-21;1.2E-20;1.2E-20;1.2E-20;2.6E-20;3.6E-20;5.4E-20;9.8E-20;1.3E-19;3.1E-19;1.2E-18;1.7E-18	lipase [Folsomia candida]	3.7e-29	334	223	19	234	53.36
MGYP000739663567	MULTISPECIES: alpha/beta fold hydrolase	268	7.7E-188;1.1E-187;1.6E-187;2.2E-187;2.2E-187;2.2E-187;2.2E-187;3.1E-187;3.1E-187;3.1E-187;3.1E-187;3.1E-187;3.1E-187;4.5E-187;4.5E-187;4.5E-187;6.3E-187;6.3E-187;9.0E-187;1.3E-186	MULTISPECIES: alpha/beta fold hydrolase [Priestia]	7.7e-188	268	268	1	268	100
MGYP000740069304	alpha/beta hydrolase	287	1.1E-111;1.1E-102;3.3E-97;2.3E-90;2.4E-87;1.3E-81;6.7E-77;2.6E-76;7.7E-63;2.5E-61;1.0E-60;6.9E-59;1.7E-58;2.0E-58;3.6E-58;3.6E-58;7.7E-58;1.0E-57;2.6E-57;2.8E-57	alpha/beta hydrolase [Litorimonas taeanensis]	1.1e-111	289	275	14	287	73.09
MGYP000741174493	alpha/beta hydrolase	230	1.2E-154;2.2E-109;9.0E-109;1.3E-108;3.7E-108;1.7E-106;1.7E-106;9.6E-98;6.9E-96;2.2E-92;3.2E-77;7.7E-77;1.1E-59;8.5E-59;8.5E-59;1.5E-58;1.7E-58;1.7E-58;2.4E-58;2.4E-58	alpha/beta hydrolase [Enterococcus sp.]	1.2e-154	230	230	1	230	96.09
MGYP000742302462	lipase family protein	286	1.1E-108;1.5E-108;4.7E-108;2.2E-105;7.2E-105;7.2E-105;3.6E-104;1.3E-103;3.3E-103;4.8E-103;6.3E-103;9.6E-103;1.9E-102;1.2E-101;1.7E-101;2.2E-101;6.3E-101;6.3E-101;5.1E-100;4.2E-99	lipase family protein [Marinomonas sp. A3A]	1.1e-108	289	270	17	286	78.52
MGYP000742605629	hypothetical protein	228	3.9E-89;4.5E-80;5.9E-74;5.8E-69;1.3E-65;3.9E-61;2.7E-60;8.5E-59;9.6E-56;2.0E-55;3.9E-55;3.1E-54;1.2E-53;1.3E-53;1.3E-53;1.3E-53;1.3E-53;1.3E-53;1.8E-53;1.8E-53	hypothetical protein [Acidocella aquatica]	3.9e-89	236	222	1	222	73.42
MGYP000742937217	alpha/beta fold hydrolase family protein	309	3.5E-194;3.5E-194;1.8E-166;4.1E-166;1.2E-165;1.7E-165;1.7E-165;6.1E-165;8.1E-164;2.2E-162;2.5E-162;2.9E-162;1.4E-161;1.8E-161;4.1E-161;4.8E-161;7.0E-161;1.2E-160;1.4E-160;1.6E-160	alpha/beta fold hydrolase family protein [Deinococcus cavernae]	3.5e-194	332	306	6	309	93.79
MGYP000744380251	alpha/beta fold hydrolase	338	8.5E-56;1.2E-55;2.4E-55;6.7E-55;2.6E-54;3.7E-54;7.3E-54;2.9E-53;5.7E-53;1.1E-52;3.2E-52;1.7E-51;1.7E-51;2.4E-51;2.4E-51;2.4E-51;2.4E-51;3.5E-51;3.5E-51;3.5E-51	alpha/beta fold hydrolase [Stigmatella hybrida]	8.5e-56	339	323	8	328	52.63
MGYP000745069930	alpha/beta fold hydrolase	232	1.2E-133;2.1E-125;8.5E-125;1.7E-124;1.1E-120;4.4E-120;7.0E-117;6.6E-108;2.2E-106;8.0E-95;1.1E-93;9.1E-92;9.1E-92;1.3E-88;1.6E-88;1.8E-83;2.5E-82;6.1E-82;1.0E-81;2.7E-81	alpha/beta fold hydrolase [uncultured Paraglaciecola sp.]	1.2e-133	257	232	1	232	90.52
MGYP000745191907	alpha/beta hydrolase	273	4.5E-125;2.4E-122;5.0E-121;1.9E-119;3.6E-117;4.7E-115;6.4E-115;1.3E-114;5.4E-114;3.1E-113;1.2E-112;7.3E-112;1.0E-111;1.5E-111;2.1E-111;3.0E-111;4.2E-111;8.4E-111;2.4E-110;2.4E-110	alpha/beta hydrolase [Geodermatophilus africanus]	4.5e-125	273	270	1	270	78.89
MGYP000745207136	alpha/beta fold hydrolase	244	2.6E-77;5.6E-74;2.1E-73;5.4E-73;2.4E-72;5.2E-71;9.2E-71;2.0E-70;2.9E-70;4.2E-70;1.3E-69;2.5E-69;3.1E-69;3.2E-69;1.2E-68;1.5E-68;3.6E-68;3.6E-68;4.5E-68;1.0E-67	alpha/beta fold hydrolase [Pseudonocardia alaniniphila]	2.6e-77	348	242	5	244	69.42
MGYP000745285957	alpha/beta fold hydrolase	201	4.1E-80;9.0E-77;1.5E-70;1.5E-68;1.1E-55;1.4E-55;3.3E-55;6.7E-55;1.4E-54;1.7E-54;2.9E-54;3.8E-54;1.4E-53;2.4E-53;4.0E-53;4.3E-53;5.2E-53;8.2E-53;1.1E-52;2.4E-52	alpha/beta fold hydrolase [Sandaracinus amylolyticus]	4.1e-80	197	191	8	197	74.35
MGYP000745534536	hypothetical protein	278	4.5E-98;7.0E-91;5.8E-73;1.1E-72;1.6E-72;1.5E-71;1.7E-71;2.4E-71;2.6E-71;6.7E-71;2.1E-70;5.1E-70;1.2E-69;3.3E-69;4.9E-69;6.2E-69;6.5E-69;6.5E-69;7.2E-69;9.0E-69	hypothetical protein [Gordonia hydrophobica]	4.5e-98	275	272	6	274	68.01
MGYP000745932489	lipase family protein	212	2e-110	lipase family protein [Candidatus Entotheonella palauensis]	2e-110	401	212	1	212	89.15
MGYP000745941934	alpha/beta fold hydrolase	285	1.0E-205;6.0E-205;6.0E-205;2.2E-182;1.6E-179;3.3E-179;3.1E-177;1.3E-176;1.8E-176;7.4E-176;5.2E-174;1.5E-173;1.7E-172;2.5E-172;4.3E-166;5.9E-166;5.9E-166;5.9E-166;8.4E-166;1.2E-165	alpha/beta fold hydrolase [Alcanivorax sp. P2S70]	1e-205	285	285	1	285	100
MGYP000746173801	hypothetical protein	272	4.2E-183;1.7E-182;2.4E-182;2.3E-180;3.2E-59;1.0E-42;6.0E-32;4.2E-31;3.6E-28;4.9E-28;5.6E-28;9.2E-28;9.2E-28;1.5E-27;2.2E-27;3.5E-27;4.9E-27;1.2E-26;1.3E-25;3.5E-25	hypothetical protein [uncultured Lawsonella sp.]	4.2e-183	264	264	9	272	99.24
MGYP000747656370	alpha/beta fold hydrolase	373	7.2E-172;2.2E-171;5.5E-171;1.2E-170;2.4E-170;6.8E-170;6.8E-170;4.9E-168;5.6E-162;9.9E-132;1.1E-131;2.6E-126;1.1E-113;8.2E-113;1.7E-111;5.8E-111;1.1E-103;2.9E-37;2.1E-36;1.1E-34	alpha/beta fold hydrolase [Polyangium sorediatum]	7.2e-172	375	297	77	373	87.88
MGYP000749691390	MULTISPECIES: lipase family protein	462	1.3E-305;3.8E-305;3.1E-304;6.2E-304;1.2E-303;1.8E-303;7.2E-303;8.4E-302;1.2E-301;3.4E-301;2.0E-300;2.8E-300;4.0E-300;8.1E-300;1.6E-299;2.3E-299;2.3E-299;3.3E-299;4.7E-299;6.6E-299	MULTISPECIES: lipase family protein [Megamonas]	1.3e-305	428	428	35	462	100
MGYP000750332089	alpha/beta fold hydrolase	292	1.4E-130;8.6E-73;1.2E-72;3.0E-71;3.4E-70;4.8E-70;7.2E-69;9.6E-69;9.6E-69;9.6E-69;9.6E-69;1.4E-68;1.6E-68;1.9E-68;2.9E-68;3.2E-68;3.7E-68;3.7E-68;4.1E-68;7.5E-68	alpha/beta fold hydrolase [Trichothermofontia sichuanensis]	1.4e-130	260	255	8	262	81.57
MGYP000750451795	alpha/beta hydrolase	285	3.8E-93;8.2E-78;2.2E-73;7.2E-73;1.4E-72;2.9E-72;7.2E-72;6.4E-71;6.6E-71;9.6E-71;9.9E-71;1.7E-70;1.9E-70;2.6E-70;3.3E-70;3.4E-70;3.6E-70;3.9E-70;4.7E-70;6.6E-70	alpha/beta hydrolase [Rugosimonospora africana]	3.8e-93	293	277	7	282	65.7
MGYP000751176046	alpha/beta fold hydrolase	197	2.1E-35;2.1E-35;8.5E-32;2.3E-31;2.3E-31;9.6E-30;1.3E-29;4.2E-29;5.7E-29;8.2E-29;1.6E-28;8.4E-27;3.5E-26;1.0E-25;1.9E-25;3.1E-25;7.1E-25;8.0E-25;8.4E-25;1.1E-24	alpha/beta fold hydrolase [Waddlia chondrophila]	2.1e-35	330	196	4	197	55.61
MGYP000751190354	alpha/beta fold hydrolase	195	6.2E-51;1.2E-50;1.1E-46;1.7E-44;3.9E-44;1.6E-41;8.5E-41;4.1E-38;6.2E-38;1.2E-37;1.2E-37;1.4E-37;1.6E-37;3.0E-37;3.0E-37;6.2E-37;8.1E-37;1.1E-36;1.4E-36;1.4E-36	alpha/beta fold hydrolase [Candidatus Rhodoluna planktonica]	6.2e-51	196	196	5	195	63.27
MGYP000753317566	alpha/beta fold hydrolase	240	7.6E-66;1.7E-62;2.7E-60;7.6E-60;1.7E-59;1.1E-58;2.3E-58;5.4E-58;5.7E-58;5.7E-58;5.7E-58;7.1E-58;9.6E-58;2.3E-57;4.4E-57;4.7E-57;5.0E-57;5.3E-57;7.1E-57;8.3E-57	alpha/beta fold hydrolase [Chthoniobacter flavus]	7.6e-66	217	193	48	240	69.95
MGYP000753401555	alpha/beta fold hydrolase	260	3.3E-81;6.2E-79;1.9E-59;7.6E-59;1.1E-56;1.8E-56;2.6E-56;2.6E-56;2.6E-56;2.6E-56;3.6E-56;4.2E-55;5.5E-55;6.9E-55;7.0E-55;9.7E-55;2.3E-54;2.5E-54;3.3E-54;3.3E-54	alpha/beta fold hydrolase [Aggregatilinea sp.]	3.3e-81	266	249	3	251	69.08
MGYP000754827104	alpha/beta fold hydrolase	245	2.9E-95;1.7E-94;9.1E-94;3.7E-93;1.1E-92;1.2E-92;1.5E-92;3.2E-92;6.0E-92;6.5E-92;1.1E-91;1.8E-91;2.6E-91;1.1E-90;1.1E-90;1.5E-90;1.5E-90;2.6E-90;4.3E-90;5.7E-90	alpha/beta fold hydrolase [Rufibacter sp. DG15C]	2.9e-95	255	245	1	244	71.43
MGYP000756258201	alpha/beta hydrolase	277	1.5E-45;4.8E-42;3.3E-41;1.1E-40;1.4E-40;2.3E-40;3.6E-40;4.2E-40;6.8E-40;1.1E-39;1.1E-39;3.0E-39;3.9E-39;8.7E-39;1.1E-38;1.3E-38;1.5E-38;2.9E-38;6.1E-38;1.0E-37	alpha/beta hydrolase [Polaribacter pacificus]	1.5e-45	279	273	3	274	53.85
MGYP000762219757	triacylglycerol lipase	452	1.6E-309;4.7E-309;4.7E-309;1.3E-308;3.8E-308;3.8E-308;5.4E-308;1.1E-307;1.6E-307;2.2E-307;2.2E-307;3.2E-307;3.2E-307;4.5E-307;4.5E-307;4.5E-307;4.5E-307;4.5E-307;6.3E-307;6.3E-307	triacylglycerol lipase [uncultured Ruminococcus sp.]	0	442	437	1	437	99.08
MGYP000765893905	Mbeg1-like protein	262	7.2E-35;9.7E-35;4.7E-33;1.8E-31;1.5E-30;3.9E-30;1.7E-29;2.0E-28;2.0E-28;1.7E-27;4.3E-27;7.5E-27;8.2E-27;1.9E-26;3.4E-26;6.6E-26;9.4E-26;4.6E-25;4.6E-25;4.7E-25	Mbeg1-like protein [Anaerocolumna sp. AGMB13025]	7.2e-35	555	197	32	228	60.91
MGYP000780333116	prolyl oligopeptidase family serine peptidase	402	2.2e-284	prolyl oligopeptidase family serine peptidase [Enterococcus raffinosus]	2.2e-284	402	402	1	402	99.5
MGYP000816474735	alpha/beta hydrolase	310	6.0E-52;2.8E-38;7.6E-38;1.2E-34;1.2E-34;2.9E-33;3.2E-33;5.8E-33;8.7E-33;1.6E-32;1.6E-32;1.8E-32;1.9E-32;1.9E-32;2.2E-32;2.6E-32;3.1E-32;4.3E-32;4.3E-32;7.0E-32	alpha/beta hydrolase [Slackia heliotrinireducens]	6e-52	305	308	8	308	52.6
MGYP000822100731	radical SAM protein	459	2.5E-310;9.7E-146;3.9E-145;5.5E-145;7.9E-145;7.9E-145;1.1E-144;6.4E-144;9.3E-143;3.8E-142;3.8E-142;7.5E-142;9.9E-140;1.4E-139;7.8E-139;1.1E-123;5.0E-122;1.1E-115;9.0E-115;1.2E-113	radical SAM protein [Blautia sp.]	2.5E-310	459	459	1	459	94.77
MGYP000831160337	MULTISPECIES: hypothetical protein	333	1.3E-246;1.9E-244;2.2E-243;6.4E-243;1.2E-240;6.1E-189;5.0E-187;6.6E-96;1.1E-94;2.1E-94;1.9E-83;5.4E-83	MULTISPECIES: hypothetical protein [Enterococcus]	1.3e-246	333	333	1	333	100
MGYP000843992635	proline iminopeptidase-family hydrolase	256	2.6E-127;1.1E-114;2.6E-105;2.5E-103;1.6E-100;5.1E-98;1.5E-97;2.1E-97;6.5E-97;2.4E-96;2.9E-96;4.3E-96;9.8E-96;1.1E-95;2.2E-95;3.7E-95;3.8E-95;4.2E-95;5.3E-95;5.3E-95	proline iminopeptidase-family hydrolase [Ideonella sp.]	2.6e-127	305	252	7	256	80.56
MGYP000844263993	alpha/beta fold hydrolase	229	2.5E-155;5.9E-152;6.3E-147;2.0E-145;4.1E-145;1.2E-144;3.5E-144;1.4E-143;2.8E-143;2.8E-143;5.5E-143;4.7E-142;6.5E-142;6.7E-142;7.4E-142;9.2E-142;1.4E-141;3.7E-141;3.7E-141;3.7E-141	alpha/beta fold hydrolase [Streptomyces sp. SM1]	2.5e-155	286	229	1	229	97.82
MGYP000845372354	lipase family protein	239	5.1E-23;5.5E-23;1.7E-22;2.9E-22;3.4E-22;4.7E-22;1.4E-21;1.4E-21;1.8E-21;2.3E-21;3.8E-21;7.4E-21;8.8E-21;1.2E-20;1.3E-20;1.7E-20;2.1E-20;2.2E-20;2.7E-20;2.9E-20	lipase family protein [Magnetospirillum sp. ME-1]	5.1e-23	354	151	27	168	59.6
MGYP000845535496	alpha/beta hydrolase	236	1.5E-143;2.9E-112;5.7E-112;8.1E-60;1.2E-37;1.2E-33;3.6E-31	alpha/beta hydrolase [Microbacterium galbinum]	1.5e-143	606	213	24	236	99.53
MGYP000846665094	alpha/beta hydrolase	225	5.4E-115;3.8E-108;1.5E-107;7.1E-107;8.4E-107;4.7E-106;1.4E-105;4.0E-105;4.0E-105;2.3E-104;3.3E-104;1.2E-103;1.3E-103;1.9E-103;2.7E-103;3.8E-103;6.2E-102;3.6E-101;5.1E-101;1.5E-100	alpha/beta hydrolase [Mycolicibacterium flavescens]	5.4e-115	219	219	7	225	86.3
MGYP000847508691	alpha/beta hydrolase	193	2.0E-67;2.7E-65;8.1E-65;1.4E-64;1.9E-64;1.8E-63;2.2E-63;2.4E-63;3.0E-63;7.9E-62;1.1E-61;1.1E-61;1.7E-61;1.7E-61;1.8E-61;2.0E-61;2.3E-61;2.6E-61;2.9E-61;4.1E-61	alpha/beta hydrolase [Actinophytocola sp.]	2e-67	245	193	1	193	70.98
MGYP000848182258	lipase family protein	247	1.4E-36;2.0E-36;2.0E-32;8.5E-32;2.5E-30;5.0E-30;1.9E-29;2.0E-29;2.0E-29;2.7E-29;2.8E-29;3.9E-29;5.3E-29;1.9E-26;5.3E-26;2.0E-25;2.1E-24;4.3E-23;1.1E-22;3.0E-21	lipase family protein [Hydrogenoanaerobacterium sp.]	1.4e-36	225	245	3	244	51.43
MGYP000848903848	lipase	187	8.9E-35;3.3E-29;1.6E-28;4.8E-28;1.5E-27;1.6E-27;6.8E-27;9.4E-27;9.6E-27;1.4E-26;2.4E-26;2.7E-26;3.1E-26;3.5E-26;5.5E-26;1.4E-25;1.8E-25;4.0E-25;4.7E-25;5.7E-25	lipase [Nymphaea colorata]	8.9e-35	194	139	34	171	67.63
MGYP000849066699	alpha/beta fold hydrolase	299	1.6E-225;1.9E-208;3.2E-207;9.9E-165;1.6E-161;2.2E-161;4.5E-161;4.5E-161;2.6E-160;7.4E-160;2.1E-159;4.2E-159;4.2E-159;4.2E-159;5.8E-159;6.0E-159;8.6E-159;1.2E-158;1.7E-158;1.7E-158	alpha/beta fold hydrolase [Acidovorax sp. RAC01]	1.6e-225	299	299	1	299	100
MGYP000849595074	hypothetical protein PpBr36_07491	192	5.3E-29;4.1E-27;6.7E-27;8.1E-27;5.8E-26;5.9E-26;6.0E-26;6.0E-26;6.3E-26;1.3E-25;1.7E-25;2.4E-25;2.4E-25;4.1E-25;6.5E-25;6.7E-25;6.9E-25;7.5E-25;9.4E-25;9.4E-25	hypothetical protein PpBr36_07491 [Pyricularia pennisetigena]	5.3e-29	348	175	19	184	54.29
MGYP000849614339	lipase family protein	213	1.3E-51;1.7E-46;2.0E-46;1.0E-45;6.7E-45;2.8E-41;4.5E-41;2.6E-40;3.8E-39;5.6E-39;1.2E-38;3.0E-38;3.5E-38;1.1E-37;3.1E-36;5.6E-35;7.4E-34;1.0E-33;1.0E-33;1.1E-32	lipase family protein [Tetrahymena thermophila SB210]	1.3e-51	285	199	6	204	59.8
MGYP000851846935	alpha/beta fold hydrolase	304	2.5E-165;1.9E-138;2.6E-138;5.3E-138;2.2E-137;5.7E-137;8.8E-137;2.5E-136;3.4E-136;2.1E-135;1.6E-134;2.4E-134;3.2E-134;3.2E-134;9.3E-134;7.6E-133;7.6E-133;1.5E-132;3.1E-132;4.4E-132	alpha/beta fold hydrolase [Dietzia sp. UBA5065]	2.5e-165	303	246	1	246	98.78
MGYP000851918783	lipase family protein	279	2.4E-54;3.3E-54;6.7E-54;6.7E-54;1.0E-53;8.4E-53;5.0E-52;9.9E-52;1.1E-51;2.8E-51;3.1E-51;4.4E-51;7.2E-51;1.1E-50;1.6E-50;2.0E-50;4.4E-50;5.9E-50;6.2E-50;8.8E-50	lipase family protein [Variovorax sp. J31P207]	2.4e-54	290	269	10	275	55.76
MGYP000852020265	alpha/beta fold hydrolase	197	4.0E-61;1.1E-55;1.5E-55;4.3E-55;7.9E-55;8.5E-55;5.9E-54;5.7E-53;3.2E-52;4.4E-52;4.4E-52;6.5E-52;1.3E-51;2.1E-51;2.5E-51;2.6E-51;3.7E-51;3.7E-51;5.0E-51;7.3E-51	alpha/beta fold hydrolase [Litorilinea aerophila]	4e-61	213	188	6	193	68.62
MGYP000852482439	alpha/beta fold hydrolase	269	9.3E-55;5.2E-54;7.4E-54;3.9E-51;1.1E-50;2.1E-50;5.9E-50;1.6E-49;3.1E-49;4.7E-49;6.6E-49;7.0E-49;9.1E-49;1.9E-48;3.0E-48;3.6E-48;9.9E-48;1.2E-47;1.3E-47;3.6E-47	alpha/beta fold hydrolase [Phaeodactylibacter xiamenensis]	9.3e-55	269	259	4	261	59.85
MGYP000852517158	alpha/beta fold hydrolase	195	2.5E-39;4.2E-39;6.2E-39;7.7E-39;8.6E-39;1.2E-38;1.4E-38;1.7E-38;2.1E-38;2.2E-38;2.2E-38;2.4E-38;3.4E-38;4.4E-38;4.4E-38;4.4E-38;4.5E-38;4.8E-38;5.4E-38;6.4E-38	alpha/beta fold hydrolase [Micromonospora sp. WMMD1155]	2.5e-39	256	201	1	195	56.72
MGYP000852617447	hypothetical protein	519	1.3E-279;6.9E-235;5.4E-112;5.1E-106;2.0E-105;1.2E-104;3.2E-104;9.9E-103;3.7E-98;1.5E-95;1.3E-94;1.0E-91;3.9E-91;5.4E-91;4.0E-90;1.8E-89;3.7E-89;5.3E-89;1.0E-88;1.9E-88	hypothetical protein [Symbiobacterium terraclitae]	1.3e-279	524	521	1	516	82.53
MGYP000852620171	AcvB/VirJ family lysyl-phosphatidylglycerol hydrolase, partial	243	4.0E-40;5.6E-40;7.1E-40;7.1E-40;8.0E-40;1.2E-39;2.8E-39;3.9E-39;5.0E-39;5.5E-39;6.0E-39;9.0E-39;1.2E-38;1.8E-38;2.0E-38;2.5E-38;2.5E-38;2.8E-38;3.1E-38;3.2E-38	AcvB/VirJ family lysyl-phosphatidylglycerol hydrolase, partial [Pandoraea sp. B-6]	4e-40	284	198	50	243	59.09
MGYP000853322792	alpha/beta fold hydrolase	521	3.9E-249;4.6E-209;3.5E-107;1.5E-102;1.8E-100;6.4E-100;7.1E-100;7.8E-100;1.1E-98;2.7E-92;3.8E-92;4.0E-92;5.2E-92;5.4E-92;2.1E-91;5.9E-91;3.8E-90;1.8E-89;1.0E-88;3.1E-88	alpha/beta fold hydrolase [Symbiobacterium thermophilum]	3.9e-249	545	548	1	520	77.74
MGYP000853923433	hypothetical protein	396	4.0E-275;5.6E-243;5.5E-194;2.7E-25;7.7E-25;1.9E-22;1.3E-20;5.8E-20;5.9E-20;7.9E-20;1.1E-19;1.9E-19;3.0E-19;8.8E-19;1.7E-18;1.9E-18;2.6E-18;3.0E-18;1.1E-17;1.8E-17	hypothetical protein [Accumulibacter sp.]	4e-275	396	396	1	396	99.75
MGYP000854480242	alpha/beta fold hydrolase	274	5.9E-58;2.7E-54;2.7E-54;3.8E-54;7.6E-54;1.2E-53;1.4E-53;1.5E-53;1.5E-53;2.2E-53;2.2E-53;2.2E-53;4.5E-53;1.1E-52;1.2E-52;1.5E-52;1.6E-52;2.8E-52;2.9E-52;3.6E-52	alpha/beta fold hydrolase [Longimicrobium sp.]	5.9e-58	272	273	3	273	56.41
MGYP000854721055	lipase family protein	250	3.2E-54;1.1E-52;2.5E-52;9.4E-52;3.2E-51;1.2E-48;2.1E-48;3.6E-48;4.3E-48;9.3E-48;3.1E-47;3.5E-47;4.2E-47;5.2E-47;8.6E-47;9.3E-47;2.9E-46;3.2E-46;3.6E-46;4.8E-46	lipase family protein [Rosistilla carotiformis]	3.2e-54	274	228	14	238	61.4
MGYP000855275952	alpha/beta fold hydrolase	169	1.4E-36;1.5E-18	alpha/beta fold hydrolase [Thermaurantimonas aggregans]	1.4e-36	433	164	11	169	60.98
MGYP000855562891	hypothetical protein	273	8.8E-201;1.5E-37	hypothetical protein [Oligosphaera ethanolica]	8.8e-201	273	273	1	273	98.53
MGYP000855992539	alpha/beta hydrolase	227	3.6E-62;4.1E-62;6.0E-62;7.0E-62;1.0E-61;2.0E-61;2.3E-61;2.3E-61;2.8E-61;7.6E-61;8.1E-61;1.5E-60;3.4E-60;4.6E-60;8.7E-60;1.8E-59;2.4E-59;2.7E-59;3.7E-59;4.5E-59	alpha/beta hydrolase [Chitinophaga silvatica]	3.6e-62	235	225	4	227	64
MGYP000856154406	alpha/beta hydrolase	273	2.0E-63;2.8E-61;4.0E-61;8.8E-61;8.8E-61;8.8E-61;1.1E-60;1.1E-60;1.1E-60;1.1E-60;1.1E-60;1.1E-60;1.1E-60;1.1E-60;1.6E-60;1.6E-60;1.7E-60;1.9E-60;2.2E-60;2.3E-60	alpha/beta hydrolase [Acetivibrio cellulolyticus]	2e-63	472	267	10	273	63.67
MGYP000856754453	hypothetical protein	238	5.4E-53;1.5E-52;2.5E-52;2.9E-52;8.5E-52;4.2E-51;7.3E-51;1.9E-50;1.0E-49;3.2E-49;4.2E-49;5.9E-49;6.4E-48;9.2E-48;1.4E-47;1.2E-46;4.8E-46;2.2E-45;9.7E-45;1.5E-44	hypothetical protein [Streptomyces sp. NBC_00683]	5.4e-53	328	236	1	235	60.17
MGYP000856963055	alpha/beta hydrolase	245	2.6E-64;2.9E-63;8.5E-63;1.5E-52;1.7E-51;2.2E-50;5.9E-49;1.7E-48;1.7E-48	alpha/beta hydrolase [Nevskia soli]	2.6e-64	269	249	1	242	60.64
MGYP000857535082	alpha/beta hydrolase	399	6.0E-273;2.1E-206;2.3E-163;2.9E-162;1.5E-98;2.1E-98;4.4E-97;6.9E-96;9.2E-95;4.1E-94;4.2E-94;4.2E-94;8.1E-94;7.0E-92;1.1E-89;9.1E-88;3.6E-79;3.1E-78;4.4E-78;2.3E-77	alpha/beta hydrolase [Microbacterium galbinum]	6e-273	653	399	1	399	97.99
MGYP000857831644	alpha/beta hydrolase	364	2.7E-259;1.0E-254;4.1E-243;5.6E-241;1.2E-50;4.6E-50;4.6E-50;4.6E-50;4.6E-50;6.4E-50;6.5E-50;6.5E-50;7.1E-49;9.9E-49;1.4E-48;2.0E-48;3.0E-47;3.8E-47;1.5E-46;5.9E-40	alpha/beta hydrolase [Parascardovia denticolens]	2.7e-259	364	364	1	364	100
MGYP000858156670	alpha/beta fold hydrolase	285	1.2E-134;5.4E-129;1.2E-125;1.9E-123;6.1E-122;2.3E-121;3.5E-121;7.3E-121;1.4E-118;1.0E-114;2.2E-114;2.2E-114;4.3E-114;9.1E-114;1.8E-113;5.2E-113;1.1E-112;1.8E-111;1.5E-110;2.7E-109	alpha/beta fold hydrolase [Dechloromonas sp. H13]	1.2e-134	290	283	1	283	81.98
MGYP000858872652	alpha/beta hydrolase	229	7.9E-86;1.3E-84;1.1E-82;5.9E-82;4.7E-81;1.0E-76;3.9E-76;1.8E-75;4.0E-74;1.7E-73;1.8E-72;8.2E-72;1.6E-70;1.9E-70;5.0E-70;8.4E-70;8.9E-70;9.5E-67;5.0E-65;2.3E-64	alpha/beta hydrolase [Bradyrhizobium arachidis]	7.9e-86	253	229	1	229	71.18
MGYP000859434778	alpha/beta fold hydrolase	230	2.9E-164;2.8E-162;1.2E-138;1.4E-137;1.1E-108;3.1E-106;4.3E-97;2.6E-94;2.5E-79;1.0E-78;5.2E-71;8.5E-69;1.6E-68;2.3E-68;2.3E-68;4.6E-68;9.2E-68;1.2E-67;1.8E-67;3.5E-67	alpha/beta fold hydrolase [uncultured Chitinophaga sp.]	2.9e-164	230	230	1	230	100
MGYP000859677103	alpha/beta hydrolase	293	5.1E-78;8.2E-64;4.3E-51;3.2E-48;9.4E-47;1.8E-45;4.0E-45;5.0E-44;6.1E-43;9.0E-43;3.2E-42;9.3E-42;4.2E-41;2.1E-40;1.6E-37;7.8E-36;1.6E-35;8.6E-35;2.5E-34;3.8E-34	alpha/beta hydrolase [Leptolyngbya sp. 7M]	5.1e-78	284	259	36	292	66.02
MGYP000860168369	alpha/beta hydrolase	262	5.7E-79;7.4E-71;3.7E-61;2.1E-60;4.2E-60;6.0E-60;6.0E-60;8.5E-60;8.5E-60;8.5E-60;8.5E-60;8.5E-60;8.5E-60;1.2E-59;1.7E-59;4.8E-59;6.0E-59;9.3E-47;6.0E-41;1.7E-39	alpha/beta hydrolase [Vallitalea longa]	5.7e-79	261	260	1	260	65
MGYP000860389300	AcvB/VirJ family lysyl-phosphatidylglycerol hydrolase, partial	236	3.3E-67;3.9E-67;4.7E-64;4.8E-64;9.0E-64;5.3E-63;9.8E-63;2.8E-62;3.4E-62;3.9E-62;7.1E-62;2.3E-61;3.5E-61;4.3E-61;5.5E-61;6.3E-61;8.5E-61;9.5E-61;1.0E-60;1.6E-60	AcvB/VirJ family lysyl-phosphatidylglycerol hydrolase, partial [Methylibium sp. T29]	3.3e-67	222	213	26	232	65.26
MGYP000861751206	alpha/beta fold hydrolase	356	7.7E-26;9.7E-25;9.7E-25;3.5E-24;1.1E-21;4.9E-20;1.6E-19;2.8E-19;5.9E-19;7.2E-19;2.2E-18;2.8E-18;3.6E-18;2.8E-16	alpha/beta fold hydrolase [Spirosoma sp.]	7.7e-26	418	241	2	230	53.11
MGYP000862246935	lipase family protein	240	2.5E-161;1.0E-160;2.4E-76;2.0E-74;5.3E-73;2.2E-72;1.9E-71;8.5E-71;1.2E-70;3.2E-70;4.0E-70;4.0E-70;5.7E-70;6.4E-70;8.1E-70;1.3E-69;3.2E-69;3.3E-69;4.8E-69;6.9E-69	lipase family protein [Pelotomaculum schinkii]	2.5e-161	240	240	1	240	97.5
MGYP000862290568	alpha/beta fold hydrolase	329	5.0E-193;1.9E-190;5.1E-181;2.5E-142;2.8E-142;3.0E-126;3.1E-126;6.4E-126;8.5E-126;1.4E-125;1.7E-125;3.4E-125;4.9E-125;4.9E-125;1.4E-124;1.4E-124;2.8E-124;4.0E-124;5.7E-124;5.7E-124	alpha/beta fold hydrolase [Aquabacterium sp. CECT 9606]	5e-193	306	306	24	329	90.2
MGYP000862475507	alpha/beta fold hydrolase	199	1.3E-128;2.2E-110;1.5E-108;2.3E-100;2.3E-100;3.1E-97;4.7E-97;2.8E-95;2.3E-75;2.4E-72;1.2E-71;2.8E-71;7.5E-71;1.6E-70;2.2E-70;6.0E-70;8.7E-70;8.9E-70;1.3E-69;2.5E-69	alpha/beta fold hydrolase [Williamsia serinedens]	1.3e-128	377	199	1	199	96.48
MGYP000862524495	alpha/beta hydrolase	283	1.7E-79;1.7E-79;3.5E-78;2.1E-77;4.2E-77;4.5E-76;4.8E-76;9.1E-76;9.1E-76;1.3E-75;1.3E-75;1.8E-75;1.8E-75;1.9E-75;3.6E-75;5.2E-75;7.3E-75;7.3E-75;7.3E-75;7.8E-75	alpha/beta hydrolase [Corallococcus sp. Z5C101001]	1.7e-79	286	265	13	277	59.62
MGYP000863711980	alpha/beta hydrolase	244	7.0E-107;2.7E-104;1.9E-102;1.8E-100;1.4E-99;5.7E-97;2.0E-86;2.4E-85;4.7E-85;3.9E-84;3.9E-78;1.9E-77;1.9E-76;3.2E-75;4.3E-75;2.6E-74;4.1E-73;2.0E-68;1.2E-64;2.2E-64	alpha/beta hydrolase [Clostridium fungisolvens]	7e-107	241	240	2	241	78.33
MGYP000863874899	lipase family protein	263	7.3E-101;1.2E-97;3.5E-97;2.8E-95;3.6E-95;6.3E-95;2.0E-93;4.5E-93;9.2E-92;1.1E-90;1.7E-90;2.2E-90;3.1E-90;4.8E-90;6.6E-90;6.9E-90;7.5E-90;9.7E-90;1.2E-89;1.4E-89	lipase family protein [Marinobacterium arenosum]	7.3e-101	267	257	7	263	73.93
MGYP000863935698	alpha/beta hydrolase	250	6.4E-24;9.8E-24;5.4E-22;3.8E-20;7.5E-20;1.2E-19;7.3E-19;1.0E-18;2.0E-18;2.0E-18;1.0E-17;3.1E-17;5.9E-17;4.3E-16	alpha/beta hydrolase [Pseudobacteroides cellulosolvens]	6.4e-24	242	238	1	235	50.84
MGYP000864352011	alpha/beta hydrolase	262	1.0E-75;4.3E-70;1.1E-69;1.2E-69;9.4E-69;9.4E-69;8.7E-68;1.0E-67;1.4E-67;1.4E-67;1.6E-67;5.8E-67;9.6E-66;2.2E-65;3.2E-65;6.2E-65;1.1E-64;1.2E-64;2.9E-64;3.0E-64	alpha/beta hydrolase [Candidatus Nucleicultrix amoebiphila]	1e-75	255	249	4	251	63.86
MGYP000864413209	alpha/beta fold hydrolase	270	6.2E-63;8.7E-63;7.8E-62;1.1E-60;2.2E-60;3.2E-60;4.1E-60;6.3E-60;1.3E-59;2.5E-59;3.6E-59;3.6E-59;4.5E-59;5.0E-59;5.0E-59;7.1E-59;1.4E-58;1.4E-58;2.0E-58;2.5E-58	alpha/beta fold hydrolase [Methylomonas sp. MO1]	6.2e-63	287	277	9	270	61.73
MGYP000865781223	radical SAM protein	460	4.6E-167;2.7E-151;2.9E-150;5.4E-148;7.7E-148;2.2E-147;3.3E-147;4.4E-147;4.4E-147;8.8E-147;8.8E-147;1.1E-145;1.0E-143;2.3E-143;3.6E-140;1.9E-137;3.8E-137;7.6E-137;1.1E-136;2.2E-136	radical SAM protein [Clostridium sp. C8-1-8]	4.6e-167	458	454	3	455	72.47
MGYP000866215194	alpha/beta hydrolase	253	1.2E-145;5.0E-112;7.1E-112;2.0E-111;8.3E-111;3.5E-110;6.5E-110;6.8E-110;9.6E-110;1.9E-109;1.9E-109;2.7E-109;2.7E-109;5.5E-109;5.5E-109;3.1E-108;9.4E-108;1.8E-107;2.5E-107;7.2E-107	alpha/beta hydrolase [Fusobacterium necrophorum]	1.2e-145	255	253	1	253	88.93
MGYP000866430432	alpha/beta hydrolase	293	1.5E-209;2.4E-208;4.7E-206;2.7E-205;1.6E-204;3.2E-204;1.8E-203;3.7E-203;2.1E-202;3.0E-202;3.3E-202;8.7E-202;2.5E-201;5.0E-201;7.2E-201;5.9E-200;2.4E-199;9.7E-199;1.4E-198;2.0E-198	alpha/beta hydrolase [Legionella pneumophila]	1.5e-209	293	293	1	293	99.66
MGYP000866669020	alpha/beta hydrolase	263	1.1E-187;2.0E-185;2.4E-184;4.8E-184;9.7E-184;8.0E-183;1.6E-182;2.3E-182;9.3E-182;7.0E-177;1.2E-175;7.1E-161;1.0E-160;2.0E-160;2.7E-160;2.9E-160;2.9E-160;3.8E-160;5.4E-160;5.8E-160	alpha/beta hydrolase [Lacticaseibacillus casei]	1.1e-187	263	263	1	263	98.86
MGYP000867324449	alpha/beta fold hydrolase	237	1.3E-129;5.7E-107;9.6E-107;2.5E-97;9.2E-97;2.5E-94;9.0E-90;3.9E-85;4.6E-74;5.3E-74;1.1E-73;1.1E-73;1.1E-73;1.1E-73;1.1E-73;1.6E-73;2.1E-73;2.0E-72;2.3E-69;6.0E-69	alpha/beta fold hydrolase [Nocardioides sp.]	1.3e-129	306	237	1	237	85.65
MGYP000867749556	hypothetical protein	275	3.2E-149;2.4E-137;1.9E-136;1.6E-135;3.3E-135;3.3E-135;1.3E-134;1.4E-132;2.8E-132;3.9E-132;3.2E-131;7.9E-73;1.5E-69;2.1E-69;4.1E-69;4.1E-69;4.1E-69;5.8E-69;6.7E-69;3.2E-68	hypothetical protein [Treponema socranskii]	3.2e-149	274	273	3	275	86.45
MGYP000867946985	alpha/beta fold hydrolase	276	2.1E-173;8.5E-96;2.5E-95;4.5E-94;4.4E-93;4.7E-93;1.5E-92;2.1E-92;2.1E-91;2.2E-91;9.5E-85;1.2E-83;1.8E-82;1.0E-81;1.4E-79;6.5E-75;2.3E-73;3.5E-72;7.7E-72;1.7E-71	alpha/beta fold hydrolase [Desulfuromonas acetexigens]	2.1e-173	276	274	1	274	95.26
MGYP000868104732	alpha/beta hydrolase	263	2.9E-90;4.6E-81;1.3E-80;5.3E-80;1.5E-79;5.1E-77;7.3E-77;7.5E-77;4.3E-76;8.4E-76;1.2E-75;1.2E-75;2.5E-75;3.5E-75;3.5E-75;3.5E-75;4.9E-75;7.0E-75;9.6E-75;1.4E-74	alpha/beta hydrolase [Hyphomicrobium sp. CS1BSMeth3]	2.9e-90	265	258	1	258	71.32
MGYP000868842787	lipase family protein	309	6.1E-23;9.4E-23;6.5E-22;4.7E-21;2.6E-20;6.6E-20;8.8E-20;9.3E-20;1.4E-19;1.4E-19;1.8E-19;2.6E-19;2.6E-19;2.7E-19;2.7E-19;3.7E-19;5.2E-19;5.3E-19;5.6E-19;6.7E-19	lipase family protein [Halalkalibacter wakoensis]	6.1e-23	237	200	99	298	52.5
MGYP000869018055	alpha/beta fold hydrolase	438	1.1E-163;4.6E-163;3.5E-160;1.7E-158;2.2E-158;2.4E-158;1.4E-157;6.4E-156;1.5E-155;1.0E-154;1.5E-154;6.0E-154;7.1E-154;1.2E-153;2.9E-153;2.9E-153;2.9E-153;4.8E-153;4.9E-153;5.0E-153	alpha/beta fold hydrolase [Treponema sp.]	1.1e-163	465	440	12	437	72.05
MGYP000869387641	lipase family protein	212	7.8E-19;1.1E-17;1.5E-17;1.1E-16;1.6E-16;2.9E-16;2.9E-16;3.0E-16;3.8E-16;4.1E-16;6.3E-16;8.0E-16;8.1E-16	lipase family protein [Nocardia sp. 348MFTsu5.1]	7.8e-19	256	201	21	206	50.75
MGYP000869459580	triacylglycerol lipase	186	3.8E-25;6.4E-23;1.3E-22;2.3E-22;2.5E-22;2.5E-22;2.5E-22;3.3E-22;4.9E-22;6.9E-22;9.7E-22;9.7E-22;1.4E-21;1.4E-21;1.4E-21;1.4E-21;1.8E-21;1.9E-21;1.9E-21;1.9E-21	triacylglycerol lipase [Mesobacillus selenatarsenatis]	3.8e-25	242	189	6	183	53.44
MGYP000869568554	alpha/beta fold hydrolase	243	1.6E-83;6.7E-82;7.0E-82;1.0E-81;1.6E-81;1.7E-81;2.0E-81;4.5E-81;8.0E-81;1.9E-80;9.2E-80;2.5E-79;2.9E-79;5.0E-79;2.4E-78;2.8E-78;4.0E-78;1.0E-77;1.6E-77;4.5E-77	alpha/beta fold hydrolase [Actinomycetospora sp. NBRC 106375]	1.6e-83	348	240	4	243	69.17
MGYP000870269142	lipase family protein	295	3.1E-38;5.1E-35;7.3E-34;1.0E-33;2.0E-33;1.1E-32;3.9E-32;5.4E-32;1.3E-30;2.8E-29;4.1E-29;7.2E-29;2.0E-25;2.8E-25;3.0E-24;3.3E-23;6.5E-23;8.7E-23;1.1E-22;1.7E-22	lipase family protein [Sphingomonas sp. ZT3P38]	3.1e-38	287	266	7	261	52.63
MGYP000870467398	alpha/beta hydrolase	274	3.9E-61;3.5E-60;8.5E-54;1.0E-45;1.1E-44;9.6E-42;1.8E-41;3.9E-40;6.9E-40;1.4E-39;2.3E-39;2.0E-38;2.1E-38;5.0E-38;1.1E-37;3.3E-37;3.8E-37;1.3E-35;3.6E-35;1.4E-33	alpha/beta hydrolase [Ruminococcus sp. OA3]	3.9e-61	282	275	4	274	59.64
MGYP000870796576	alpha/beta hydrolase	260	9.7E-93;1.2E-89;3.6E-89;1.8E-85;6.6E-85;1.3E-84;5.5E-84;1.1E-83;1.5E-83;6.7E-83;9.6E-83;7.2E-82;1.1E-81;3.1E-81;6.5E-80;9.2E-78;5.8E-77;1.2E-76;6.6E-76;1.2E-75	alpha/beta hydrolase [Kaistia algarum]	9.7e-93	265	257	1	255	70.82
MGYP000871104652	alpha/beta fold hydrolase	261	9.0E-48;6.0E-45;1.2E-44;1.8E-44;4.5E-44;6.2E-44;6.2E-44;8.8E-44;1.2E-43;1.2E-43;1.2E-43;1.2E-43;1.2E-43;1.7E-43;1.7E-43;1.7E-43;1.7E-43;1.7E-43;1.7E-43;1.7E-43	alpha/beta fold hydrolase [Spirochaeta africana]	9e-48	298	249	15	260	60.24
MGYP000871323526	MULTISPECIES: lipase family protein	323	1.2E-237;6.7E-237;9.5E-237;1.6E-219;1.0E-205;3.2E-202;1.8E-200;3.8E-195;3.8E-181;2.1E-164;1.1E-150;1.1E-150;4.4E-150;1.5E-146;2.6E-111;2.4E-67;2.7E-67;4.4E-36;1.5E-32;2.9E-32	MULTISPECIES: lipase family protein [Klebsiella]	1.2e-237	323	323	1	323	100
MGYP000872164737	alpha/beta fold hydrolase	298	3.5E-66;1.5E-62;2.9E-62;1.7E-61;4.8E-61;1.3E-58;3.1E-55;1.6E-51;9.9E-50;2.8E-49;3.1E-48;1.5E-42;3.9E-42;1.1E-41;2.1E-41;4.4E-41;5.7E-41;5.7E-41;5.7E-41;6.2E-41	alpha/beta fold hydrolase [Desulforegula conservatrix]	3.5e-66	295	284	17	297	62.32
MGYP000873093692	alpha/beta fold hydrolase	464	9.2E-233;1.9E-232;2.6E-232;4.6E-232;4.9E-232;1.1E-231;1.9E-231;1.2E-230;1.5E-230;1.8E-230;2.2E-230;2.5E-230;3.1E-230;3.1E-230;3.6E-230;4.3E-230;6.0E-230;1.4E-229;2.0E-229;2.9E-229	alpha/beta fold hydrolase [Hydrogenophaga sp.]	9.2e-233	458	422	45	463	85.31
MGYP000874266282	lipase family protein	286	6.0E-171;8.5E-123;7.9E-121;3.4E-78;3.9E-77;5.1E-59;3.5E-55;5.0E-55;5.6E-54;4.4E-53;2.5E-52;2.5E-52;4.3E-50;2.5E-46;1.3E-42;1.3E-42;2.4E-42;2.5E-42;3.4E-42;6.4E-42	lipase family protein [Serratia marcescens]	6e-171	285	279	1	279	88.53
MGYP000874509537	alpha/beta hydrolase	264	1.8E-123;2.0E-123;2.4E-123;2.5E-122;1.0E-121;2.0E-117;7.0E-117;1.7E-114;2.0E-110;5.6E-110;1.0E-109;5.6E-109;1.0E-102;1.6E-101;3.2E-101;9.1E-101;7.7E-100;5.1E-98;5.9E-97;8.4E-97	alpha/beta hydrolase [Devosia sp.]	1.8e-123	298	260	4	263	79.62
MGYP000875813097	hypothetical protein	258	1.5E-83;2.4E-82;4.0E-81;1.2E-80;2.4E-79;6.4E-79;5.4E-78;2.4E-76;1.3E-75;1.7E-75;1.5E-74;6.3E-69;2.5E-67;4.6E-67;7.2E-67;1.1E-66;1.8E-66;2.6E-66;2.9E-66;1.3E-65	hypothetical protein [Phragmitibacter flavus]	1.5e-83	420	257	1	257	67.32
MGYP000876353540	3-oxoadipate enol-lactonase	225	1.5E-93;1.4E-92;1.6E-91;3.0E-91;4.2E-91;8.4E-91;1.2E-90;1.4E-89;3.9E-89;1.6E-88;2.1E-88;2.3E-88;5.6E-88;9.5E-88;1.4E-87;1.9E-87;2.5E-87;2.6E-87;3.2E-87;3.7E-87	3-oxoadipate enol-lactonase [Mycolicibacterium xanthum]	1.5e-93	250	197	29	225	79.7
MGYP000876362955	alpha/beta fold hydrolase	192	1.2E-120;6.1E-76;5.7E-67;4.2E-66;4.9E-62;7.1E-57;2.5E-54;6.9E-54;7.1E-52;5.4E-40;8.6E-39;9.6E-39;3.4E-38;3.8E-38;9.6E-38;8.5E-37;3.3E-36;4.0E-34;3.6E-33;6.4E-33	alpha/beta fold hydrolase [Nakamurella multipartita]	1.2e-120	307	192	1	192	97.92
MGYP000876506534	hypothetical protein	200	2.5E-69;2.1E-46;6.0E-38;6.7E-38;3.2E-37;4.6E-36;1.5E-35;1.7E-32;1.7E-32;2.0E-32;2.2E-32;2.5E-32;1.6E-31;1.8E-31;3.8E-31;1.6E-30;1.7E-30;2.1E-30;2.8E-30;4.2E-30	hypothetical protein [Baekduia alba]	2.5e-69	333	189	12	200	73.02
MGYP000877104779	alpha/beta fold hydrolase, partial	218	5.5E-58;4.0E-57;1.5E-56;1.9E-56;3.1E-56;5.0E-56;7.6E-56;2.1E-55;4.7E-55;1.3E-54;1.5E-54;2.6E-54;2.6E-54;3.2E-54;4.9E-54;5.2E-54;7.6E-54;1.1E-53;1.4E-53;6.1E-53	alpha/beta fold hydrolase, partial [Pyxidicoccus fallax]	5.5e-58	208	194	24	217	65.98
MGYP000877289269	alpha/beta fold hydrolase	294	3.2E-44;4.9E-43;3.2E-40;1.2E-39;1.7E-39;2.1E-39;2.5E-39;2.5E-39;2.5E-39;2.5E-39;2.5E-39;3.5E-39;3.5E-39;3.5E-39;3.5E-39;3.5E-39;3.5E-39;3.5E-39;3.5E-39;3.5E-39	alpha/beta fold hydrolase [Micavibrio aeruginosavorus]	3.2e-44	283	217	73	283	56.22
MGYP000879985505	lipase family protein	176	4e-18	lipase family protein [Endozoicomonas sp. OPT23]	4e-18	274	120	1	110	57.5
MGYP000880024395	alpha/beta fold hydrolase	227	2.4E-78;2.4E-76;6.7E-76;1.3E-75;2.7E-75;3.0E-75;1.1E-74;4.9E-74;1.3E-73;7.0E-73;8.0E-73;1.1E-72;7.8E-72;1.4E-71;6.5E-71;3.2E-70;6.4E-70;9.9E-69;2.8E-68;3.4E-68	alpha/beta fold hydrolase [Niastella populi]	2.4e-78	227	226	1	225	68.58
MGYP000880680647	lipase	259	3.5E-69;7.3E-66;9.7E-66;1.3E-65;2.0E-65;2.1E-65;4.5E-65;4.6E-65;4.8E-65;5.0E-65;9.5E-65;2.9E-64;3.7E-64;1.3E-63;3.9E-63;4.2E-63;5.2E-63;5.7E-63;5.7E-63;6.4E-63	lipase [Abyssibacter profundi]	3.5e-69	341	247	17	254	65.59
MGYP000880747414	alpha/beta hydrolase	219	8.5E-59;7.8E-52;8.1E-51;8.1E-51;2.5E-50;3.2E-50;4.7E-50;1.8E-49;2.7E-49;3.7E-49	alpha/beta hydrolase [Bdellovibrio bacteriovorus]	8.5e-59	259	221	1	219	62.44
MGYP000882764717	lipase family protein	276	5.9E-23;1.5E-20;1.9E-20;1.1E-19;7.0E-19;5.9E-18;9.6E-18;9.6E-18;1.9E-17;3.5E-17;4.7E-17;9.2E-17;9.6E-17;2.1E-16;2.3E-16;2.4E-16;2.5E-16;2.6E-16;3.7E-16;6.1E-16	lipase family protein [Atopomonas hussainii]	5.9e-23	270	272	9	270	50
MGYP000885050438	alpha/beta fold hydrolase	452	1.4E-105;1.3E-50;4.3E-48;1.9E-47;1.2E-44;2.0E-44;7.5E-43;2.1E-42;4.6E-42;4.1E-40;7.1E-34;7.9E-34;2.5E-32;1.7E-29;1.5E-16	alpha/beta fold hydrolase [Thermaurantimonas aggregans]	1.4e-105	433	402	51	452	60.2
MGYP000885546403	alpha/beta hydrolase	268	2.3E-155;5.4E-154;3.3E-148;5.2E-146;2.3E-139;1.9E-137;1.6E-136;6.2E-136;2.8E-135;5.5E-135;1.6E-134;2.1E-134;3.3E-134;2.4E-132;2.8E-130;3.6E-128;4.0E-128;8.9E-128;4.2E-127;1.2E-126	alpha/beta hydrolase [Clostridium kluyveri]	2.3e-155	269	268	1	268	86.94
MGYP000885750931	alpha/beta hydrolase	307	3.7E-38;3.7E-38;7.2E-38;2.0E-37;5.6E-37;2.2E-36;2.2E-36;4.2E-36;4.4E-36;5.9E-36;6.2E-36;1.2E-35;1.2E-35;1.2E-35;1.6E-35;1.6E-35;1.6E-35;1.6E-35;1.6E-35;1.6E-35	alpha/beta hydrolase [Apibacter sp.]	3.7e-38	254	225	72	295	56
MGYP000886304730	hypothetical protein	301	1.2E-210;1.3E-207;6.1E-206;2.3E-50;3.2E-50;8.2E-49;3.1E-41;1.9E-39;3.7E-39;2.0E-38;6.3E-37;2.0E-35;2.0E-35;5.0E-35;4.1E-34;7.9E-33;1.6E-31;7.1E-31;7.6E-31;2.7E-30	hypothetical protein [Desulfuromonas thiophila]	1.2e-210	301	301	1	301	100
MGYP000886491040	alpha/beta fold hydrolase	254	3.0E-39;6.8E-28;1.6E-25;2.9E-25;4.3E-24;2.6E-23;7.9E-22;1.5E-21;1.2E-20;1.5E-20;1.8E-20;2.6E-20;2.8E-20;3.1E-20;3.1E-20;3.3E-20;4.1E-20;5.2E-20;8.7E-20;1.1E-19	alpha/beta fold hydrolase [Desulfatiglans anilini]	3e-39	269	251	3	250	52.99
MGYP000887225298	alpha/beta hydrolase	265	1.1E-128;4.5E-128;9.1E-128;1.3E-127;3.7E-127;7.5E-127;1.5E-126;2.1E-126;3.0E-126;3.0E-126;6.1E-126;8.7E-126;5.0E-125;4.5E-121;5.5E-105;8.7E-103;1.1E-100;1.5E-100;1.8E-99;1.7E-96	alpha/beta hydrolase [Streptococcus gallolyticus]	1.1e-128	265	265	1	265	79.62
MGYP000887325776	alpha/beta fold hydrolase	533	2.4E-119;9.8E-116;8.6E-113;1.0E-110;4.2E-107;7.6E-107;3.5E-105;5.0E-105;5.1E-99;1.3E-23;3.4E-23;3.4E-22;1.6E-21;8.7E-20;3.2E-19;5.7E-19;5.7E-19;1.8E-18;2.2E-18;2.3E-18	alpha/beta fold hydrolase [Leptolyngbya sp. FACHB-711]	2.4e-119	661	477	25	494	62.05
MGYP000887388247	Mbeg1-like protein	383	3.2E-87;4.5E-87;6.4E-87;6.4E-87;9.0E-87;2.5E-86;1.5E-85;5.0E-85;1.5E-84;6.5E-84;6.5E-84;1.1E-83;4.6E-83;6.7E-83;7.1E-83;9.4E-83;1.5E-82;1.8E-82;1.9E-82;2.8E-82	Mbeg1-like protein [uncultured Clostridium sp.]	3.2e-87	363	339	35	361	62.83
MGYP000888362218	alpha/beta fold hydrolase	243	9.4E-77;2.6E-61;9.3E-56;2.1E-46;2.8E-43;2.1E-42;1.2E-41;8.9E-40;3.0E-39;2.9E-17	alpha/beta fold hydrolase [Pontiella desulfatans]	9.4e-77	246	245	1	243	64.9
MGYP000888509415	MULTISPECIES: alpha/beta hydrolase	389	1.6E-106;3.1E-106;4.4E-106;2.0E-104;2.3E-83;1.4E-72;6.6E-72;2.6E-70;7.2E-70;9.4E-70;1.1E-68;2.2E-62;3.0E-61;5.8E-59;8.8E-59;9.3E-59;4.5E-58;6.3E-58;9.6E-58;7.8E-57	MULTISPECIES: alpha/beta hydrolase [Phycicoccus]	1.6e-106	399	386	7	388	59.84
MGYP000888731261	alpha/beta hydrolase	293	1.9E-136;2.6E-120;4.6E-119;2.7E-118;2.9E-117;3.3E-116;7.1E-116;1.3E-115;3.8E-115;2.2E-114;2.4E-114;1.6E-113;1.8E-113;1.5E-112;1.5E-112;5.9E-112;1.2E-111;4.7E-110;8.1E-100;2.7E-98	alpha/beta hydrolase [Aquisediminimonas profunda]	1.9e-136	293	293	1	293	77.82
MGYP000889079209	alpha/beta hydrolase	261	2.7E-91;3.2E-90;6.4E-90;1.8E-89;2.1E-89;3.0E-89;3.0E-89;4.3E-89;6.1E-89;7.3E-89;7.3E-89;1.0E-88;1.0E-88;1.5E-88;1.9E-88;2.1E-88;3.0E-88;3.0E-88;4.2E-88;6.0E-88	alpha/beta hydrolase [Bacillus cereus group sp. BfR-BA-01383]	2.7e-91	270	245	10	254	75.51
MGYP000889446421	MULTISPECIES: alpha/beta hydrolase	305	1.9E-45;2.1E-45;1.3E-38;3.3E-37;1.3E-25	MULTISPECIES: alpha/beta hydrolase [unclassified Ruminococcus]	1.9e-45	320	282	26	303	50.71
MGYP000889800438	EAL domain-containing protein	440	1.1E-110;3.6E-50;1.2E-48;2.2E-45;5.9E-45;2.2E-44;3.0E-44;4.2E-44;8.2E-44;1.1E-43;8.2E-43;2.1E-41;5.7E-40;5.9E-28;7.3E-26;1.1E-25;9.3E-25;1.4E-24;2.0E-24;7.2E-24	EAL domain-containing protein [Xianfuyuplasma coldseepsis]	1.1e-110	480	433	7	436	67.44
MGYP000889813013	MULTISPECIES: alpha/beta fold hydrolase	250	2.4E-35;2.3E-33;1.7E-32;1.8E-32;5.4E-31;6.2E-31;4.1E-30;4.3E-30;6.1E-30;9.6E-30;1.0E-29;2.3E-29;2.7E-29;3.4E-29;5.2E-29;7.0E-28;9.8E-28;1.9E-27;2.3E-27;7.5E-27	MULTISPECIES: alpha/beta fold hydrolase [Deinococcus]	2.4e-35	251	235	15	246	54.04
MGYP000890487728	lipase family protein	200	5.9E-21;1.8E-20;6.7E-20;2.1E-19;2.2E-19;7.4E-19;7.4E-19;7.4E-19;9.3E-19;3.9E-18;3.9E-18;3.9E-18;3.9E-18;7.6E-18;7.9E-18;1.1E-17;2.5E-17;3.0E-17;7.4E-17;8.2E-17	lipase family protein [Mariprofundus sp. EBB-1]	5.9e-21	302	182	12	186	51.65
MGYP000890652307	alpha/beta hydrolase	239	3.9E-95;7.3E-95;8.0E-95;1.6E-94;8.4E-94;1.3E-93;1.7E-93;5.2E-93;7.1E-93;1.0E-92;1.4E-92;1.5E-92;1.5E-92;2.4E-92;2.5E-92;2.9E-92;4.3E-92;5.7E-92;5.8E-92;6.1E-92	alpha/beta hydrolase [Terrimonas ginsenosidimutans]	3.9e-95	291	236	1	236	75.42
MGYP000892021429	lipase family protein	159	1.1E-28;1.0E-25;2.2E-24;5.1E-24;1.7E-22;5.1E-22;5.2E-22;6.0E-22;8.1E-22;4.5E-21;3.8E-20;7.5E-20;2.1E-19;3.1E-19;4.5E-19;8.7E-19;8.8E-19;9.0E-19;1.1E-18;1.3E-18	lipase family protein [Tetrahymena thermophila SB210]	1.1e-28	284	141	21	159	61.7
MGYP000892773025	triacylglycerol lipase	285	1.8E-192;7.5E-192;1.1E-191;2.1E-191;4.3E-191;6.1E-191;8.7E-191;1.2E-190;2.5E-190;3.5E-190;5.0E-190;1.0E-189;1.4E-189;1.4E-189;2.1E-189;1.7E-188;6.8E-188;9.7E-188;4.0E-187;8.0E-187	triacylglycerol lipase [uncultured Acidovorax sp.]	1.8e-192	313	285	1	285	99.3
MGYP000893863831	alpha/beta fold hydrolase	251	1.8E-180;2.5E-180;1.0E-179;2.0E-179;4.1E-179;4.3E-179;1.6E-178;5.0E-152;1.0E-151;2.0E-151;4.1E-151;2.0E-149;3.4E-112;1.9E-107;1.2E-104;8.8E-102;6.3E-101;3.3E-100;2.4E-98;1.7E-91	alpha/beta fold hydrolase [Cardiobacterium valvarum]	1.8e-180	251	249	1	249	98.39
MGYP000894207283	Fungal lipase-like domain-containing protein	152	4.0E-24;4.5E-23;3.4E-21;2.4E-20;1.2E-19;1.5E-19;5.2E-19;5.8E-19;7.2E-19;2.1E-18;3.2E-18;5.5E-18;1.0E-17;1.7E-17;2.2E-17;2.6E-17;2.9E-17;3.1E-17;3.1E-17;4.5E-17	Fungal lipase-like domain-containing protein [Caenorhabditis elegans]	4e-24	186	148	1	148	54.05
MGYP000894711762	alpha/beta hydrolase	281	3.9E-45;4.7E-44;3.4E-43;5.8E-43;3.2E-42;8.5E-42;9.0E-42;9.0E-42;9.0E-42;1.3E-41;1.7E-41;2.1E-41;2.5E-41;2.9E-41;3.4E-41;3.5E-41;4.7E-41;6.8E-41;7.0E-41;9.1E-41	alpha/beta hydrolase [uncultured Desulfosarcina sp.]	3.9e-45	283	277	5	277	55.23
MGYP000894788590	lipase family protein	184	1.5E-30;2.0E-28;5.1E-28;1.2E-27;1.3E-27;2.3E-26;4.5E-26;4.5E-26;6.1E-25;1.9E-24;2.8E-24;3.7E-24;1.5E-23;2.1E-23;2.1E-23;2.6E-23;1.9E-22;2.2E-22;2.6E-22;4.2E-22	lipase family protein [Tetrahymena thermophila SB210]	1.5e-30	283	156	30	184	58.33
MGYP000895156075	alpha/beta hydrolase	213	6.8E-43;5.1E-42;7.3E-42;5.3E-41;1.5E-40;4.6E-40;6.4E-40;8.4E-40;1.0E-39;1.2E-39;1.5E-39;4.1E-39;4.4E-39;6.2E-39;8.2E-39;1.9E-37;1.9E-37;2.2E-37;1.8E-36;2.5E-36	alpha/beta hydrolase [Intrasporangium chromatireducens]	6.8e-43	225	209	5	210	60.77
MGYP000895448369	alpha/beta hydrolase	263	1.8E-69;1.0E-68;1.3E-68;3.7E-68;5.6E-68;1.5E-67;4.3E-67;4.9E-67;7.5E-66;7.5E-66;2.4E-64;5.2E-64;5.2E-64;9.4E-64;2.3E-63;1.6E-62;1.7E-62;2.5E-62;4.6E-62;3.8E-60	alpha/beta hydrolase [Methanococcoides alaskense]	1.8e-69	257	240	3	242	64.17
MGYP000895796307	alpha/beta fold hydrolase	277	5.4E-88;5.4E-88;1.6E-86;3.5E-86;1.2E-85;2.9E-84;6.9E-83;5.4E-82;1.2E-80;1.2E-80;4.5E-78;2.1E-76;1.5E-74;3.9E-72;4.1E-71;6.1E-70;8.6E-70;3.0E-69;1.2E-67;1.4E-66	alpha/beta fold hydrolase [Desulfuromonas sp.]	5.4e-88	281	261	13	273	68.58
MGYP000896383162	alpha/beta fold hydrolase	198	1.6E-24;9.1E-18;6.9E-16	alpha/beta fold hydrolase [uncultured Halomonas sp.]	1.6e-24	186	108	1	108	65.74
MGYP000896649599	alpha/beta hydrolase	262	4.8E-102;6.4E-100;3.9E-60;1.2E-58;1.2E-56;5.7E-56;5.7E-56;2.7E-55;3.1E-55;7.5E-55;2.1E-54;3.7E-54;4.9E-54;6.6E-54;6.6E-54;7.0E-54;8.3E-54;8.8E-54;9.3E-54;9.9E-54	alpha/beta hydrolase [Mycetocola sp. BIGb0189]	4.8e-102	260	259	1	259	74.52
MGYP000897473817	triacylglycerol lipase	344	5.0E-117;1.6E-115;3.5E-114;7.0E-114;7.6E-114;1.1E-113;1.1E-113;1.6E-113;3.1E-113;4.3E-113;1.2E-112;1.4E-112;1.4E-112;1.5E-112;2.0E-112;2.6E-112;3.2E-112;3.3E-112;7.0E-112;7.7E-112	triacylglycerol lipase [uncultured Oscillibacter sp.]	5e-117	338	264	86	344	77.27
MGYP000897662693	alpha/beta hydrolase	315	2.8E-119;1.3E-107;1.1E-106;3.5E-105;3.5E-105;2.9E-104;2.9E-104;8.4E-104;1.6E-103;1.4E-99;4.9E-99;1.8E-98;4.3E-98;8.7E-98;1.9E-97;3.3E-96;2.5E-95;5.8E-95;4.7E-94;9.2E-81	alpha/beta hydrolase [Leptospira perolatii]	2.8e-119	309	309	1	308	72.82
MGYP000898288860	alpha/beta hydrolase	257	1.0E-76;4.6E-74;1.0E-70;1.5E-68;1.5E-67;2.2E-67;2.9E-67;6.2E-67;1.6E-66;1.7E-66;2.4E-66;2.5E-66;2.5E-66;1.3E-65;1.8E-65;2.0E-65;4.9E-65;6.4E-65;9.2E-64;2.2E-63	alpha/beta hydrolase [Mesobacillus campisalis]	1e-76	266	258	1	257	64.73
MGYP000899169392	S8 family serine peptidase	216	2.1E-43;1.4E-40;2.4E-39;4.5E-39;8.6E-37;1.3E-35;2.4E-35;5.4E-35;1.1E-34;2.3E-34;7.6E-34;1.5E-33;7.3E-33;3.1E-32;6.7E-32;1.2E-30;1.8E-30;3.3E-30;8.8E-30;8.8E-30	S8 family serine peptidase [Thiocapsa bogorovii]	2.1e-43	893	172	1	170	63.37
MGYP000899318719	alpha/beta fold hydrolase	265	6.7E-47;4.4E-46;9.8E-45;4.6E-43;6.5E-43;6.5E-43;1.3E-42;2.1E-42;1.0E-41;1.0E-41;1.1E-41;1.8E-40;2.3E-40;2.4E-40;2.5E-40;3.0E-40;3.3E-40;1.3E-39;3.3E-39;3.4E-39	alpha/beta fold hydrolase [Leptolinea tardivitalis]	6.7e-47	266	270	1	262	55.93
MGYP000899867424	lipase family protein	282	8.3E-28;3.2E-27;4.4E-27;3.7E-26;2.4E-25;4.8E-25;6.6E-25;9.2E-25;9.2E-25;6.8E-24;1.9E-23;4.4E-23;1.0E-22;1.4E-22;2.7E-22;7.4E-22;9.9E-22;1.0E-21;1.4E-21;2.0E-21	lipase family protein [Aliagarivorans marinus]	8.3e-28	272	263	21	279	50.57
MGYP000900458449	lipase family protein	211	5.0E-21;7.0E-21;1.4E-20;1.7E-20;2.9E-20;3.4E-20;3.4E-20;4.0E-20;7.0E-20;1.1E-19;1.4E-19;2.2E-19;4.0E-19;5.9E-19;6.2E-19;6.2E-19;7.8E-19;7.8E-19;1.1E-18;1.3E-18	lipase family protein [Halalkalibacter sp. HR 1-10]	5e-21	239	143	5	146	58.04
MGYP000900530631	alpha/beta hydrolase	248	4.5E-33;7.5E-33;2.0E-32;3.1E-32;3.5E-32;4.0E-32;4.2E-32;4.2E-32;4.5E-32;4.7E-32;7.2E-32;7.2E-32;7.3E-32;8.4E-32;9.4E-32;9.4E-32;9.4E-32;1.3E-31;2.0E-31;2.1E-31	alpha/beta hydrolase [Actinomyces provencensis]	4.5e-33	300	242	1	237	55.79
MGYP000900563079	hypothetical protein DDB_G0278621	206	5.2E-25;3.3E-24;2.5E-20;4.6E-20;4.7E-20;6.9E-20;3.0E-19;1.5E-17;1.3E-16;1.3E-16;1.6E-16;1.7E-16;1.7E-16;1.7E-16;2.4E-16;2.4E-16;2.4E-16;3.1E-16;3.2E-16;3.2E-16	hypothetical protein DDB_G0278621 [Dictyostelium discoideum AX4]	5.2e-25	856	165	1	163	57.58
MGYP000901073752	lipase family protein	247	5.3E-19;3.8E-18;3.8E-18;5.3E-18;6.0E-18;7.4E-18;1.4E-17;4.2E-16	lipase family protein [Paenibacillus sp. Soil766]	5.3e-19	260	152	38	188	54.61
MGYP000901285277	hypothetical protein	337	6.5E-242;2.3E-124	hypothetical protein [Accumulibacter sp.]	6.5e-242	328	328	10	337	100
MGYP000901335973	alpha/beta fold hydrolase	306	6.1E-130;8.7E-130;8.7E-130;1.7E-129;2.5E-129;5.0E-129;2.9E-128;4.1E-128;4.1E-128;4.1E-128;4.1E-128;5.8E-128;8.2E-128;1.6E-127;2.3E-127;6.7E-127;9.5E-127;1.4E-126;8.3E-126;8.3E-126	alpha/beta fold hydrolase [Leptospira yasudae]	6.1e-130	307	306	2	306	76.47
MGYP000901864840	alpha/beta fold hydrolase	276	7.7E-155;3.1E-154;1.6E-153;8.0E-151;3.9E-143;7.3E-141;7.6E-141;8.1E-141;2.3E-138;6.7E-131;3.9E-130;7.4E-125;8.7E-122;1.9E-121;1.2E-119;1.5E-119;3.7E-118;1.2E-117;1.6E-117;2.2E-117	alpha/beta fold hydrolase [Nocardioides sp. URHA0032]	7.7e-155	274	276	1	276	89.49
MGYP000903211360	alpha/beta hydrolase	261	2.0E-145;7.2E-138;1.8E-136;2.0E-135;5.2E-130;1.6E-118;3.5E-118;4.5E-115;1.4E-114;5.1E-113;7.5E-113;8.4E-112;1.7E-111;9.7E-111;9.7E-111;1.4E-110;2.0E-110;3.0E-110;4.0E-110;4.2E-110	alpha/beta hydrolase [Sporomusa sphaeroides]	2e-145	318	257	1	257	85.99
MGYP000903435144	alpha/beta-hydrolase	326	7.4E-47;1.0E-45;1.3E-45;2.8E-45;9.0E-45;1.2E-44;1.5E-44;1.8E-44;3.1E-44;4.8E-44;6.4E-44;7.7E-44;8.1E-44;8.3E-44;1.6E-43;2.0E-43;2.2E-43;2.3E-43;2.3E-43;2.5E-43	alpha/beta-hydrolase [Annulohypoxylon truncatum]	7.4e-47	329	281	26	282	54.8
MGYP000904182792	alpha/beta hydrolase	272	9.2E-69;2.6E-68;1.6E-67;3.1E-67;1.7E-66;4.6E-66;6.8E-66;7.2E-66;7.4E-66;1.4E-65;4.7E-64;4.8E-64;1.9E-63;2.1E-62;4.0E-62;6.0E-62;2.3E-61;2.6E-61;2.6E-61;3.9E-61	alpha/beta hydrolase [Methanolobus psychrotolerans]	9.2e-69	255	237	22	258	69.2
MGYP000904879016	alpha/beta hydrolase	272	1.3E-77;1.0E-75;8.0E-75;2.1E-74;2.2E-74;2.3E-74;2.3E-74;4.1E-74;4.3E-74;8.3E-74;9.7E-74;1.4E-73;1.9E-73;2.0E-73;2.4E-73;2.4E-73;2.8E-73;3.3E-73;3.3E-73;3.3E-73	alpha/beta hydrolase [Paenibacillus nasutitermitis]	1.3e-77	272	263	6	268	61.6
MGYP000905507430	uncharacterized protein GSPATT00037943001	245	1.9E-44;1.5E-43;1.2E-42;5.3E-41;9.0E-41;1.0E-40;1.9E-38;2.2E-36;1.7E-35;9.0E-35;9.1E-35;4.8E-34;5.9E-34;1.1E-33;1.1E-33;1.5E-33;2.0E-33;4.8E-33;4.9E-33;5.6E-33	uncharacterized protein GSPATT00037943001 [Paramecium tetraurelia]	1.9e-44	295	214	14	220	57.94
MGYP000905520813	alpha/beta hydrolase	275	2.9E-77;4.2E-77;4.1E-76;2.9E-75;3.1E-75;6.7E-75;1.1E-74;3.8E-74;6.2E-73;1.2E-71;1.8E-71;1.1E-70;3.0E-70;1.0E-69;1.2E-69;5.7E-69;4.5E-67;6.8E-63;9.8E-63;3.8E-62	alpha/beta hydrolase [Phototrophicus methaneseepsis]	2.9e-77	282	273	1	271	65.93
MGYP000906024690	MULTISPECIES: alpha/beta hydrolase	271	4.6E-88;2.6E-81;1.1E-79;1.2E-79;2.2E-79;2.6E-79;2.8E-79;2.9E-79;3.4E-79;5.4E-79;5.6E-79;7.4E-79;7.4E-79;7.4E-79;1.1E-78;2.5E-78;2.7E-78;3.1E-78;4.4E-78;4.4E-78	MULTISPECIES: alpha/beta hydrolase [unclassified Alistipes]	4.6e-88	272	262	1	261	70.99
MGYP000906250877	triacylglycerol lipase	326	3.8E-233;1.6E-232;1.6E-232;6.4E-232;3.7E-231;2.1E-230;2.1E-230;2.1E-230;6.1E-230;6.1E-230;8.7E-230;2.5E-229;5.0E-229;5.0E-229;1.4E-228;2.0E-228;1.9E-226;8.0E-226;8.0E-226;3.7E-219	triacylglycerol lipase [Acinetobacter lwoffii]	3.8e-233	326	326	1	326	99.39
MGYP000906251552	alpha/beta hydrolase	242	5.1E-93;9.3E-92;2.2E-91;3.8E-90;1.6E-57;2.6E-56;5.1E-56;2.7E-52;2.7E-52;3.8E-52;8.0E-52;1.8E-47;3.6E-47;2.2E-45;3.3E-45;4.7E-45;3.3E-44;5.7E-33;2.3E-32;2.1E-31	alpha/beta hydrolase [Beutenbergia cavernae]	5.1e-93	245	238	1	238	73.53
MGYP000906371471	alpha/beta fold hydrolase	322	2.7E-228;6.4E-227;4.0E-158;1.4E-156;3.0E-155;3.4E-155;6.1E-155;2.8E-154;3.9E-154;1.3E-152;2.1E-152;1.4E-151;4.0E-150;2.3E-149;3.2E-149;7.7E-149;1.5E-148;7.7E-148;7.3E-147;1.0E-146	alpha/beta fold hydrolase [Rhodococcus sp. (in: high G+C Gram-positive bacteria)]	2.7e-228	319	319	4	322	100
MGYP000906775025	MULTISPECIES: alpha/beta hydrolase	301	1.8E-121;2.7E-111;1.6E-110;3.6E-109;1.6E-108;2.6E-107;1.5E-105;9.3E-101;1.6E-100;3.6E-95;5.2E-95;5.9E-94;1.4E-92;1.4E-89;9.9E-87;9.9E-87;1.2E-86;2.6E-86;2.8E-86;2.8E-86	MULTISPECIES: alpha/beta hydrolase [Eubacteriales]	1.8e-121	300	299	1	299	71.91
MGYP000907434357	alpha/beta fold hydrolase	343	1.7E-80;2.8E-76;3.5E-76;9.0E-75;1.3E-66;9.3E-63;5.2E-61;3.6E-59;2.3E-56;8.4E-55;1.2E-54;8.8E-50;1.1E-49;1.2E-32;2.6E-21	alpha/beta fold hydrolase [Desulfotomaculum nigrificans]	1.7e-80	303	295	48	339	65.76
MGYP000907700179	alpha/beta fold hydrolase	243	7.1E-37;2.7E-35;6.5E-35;6.5E-35;1.2E-34;8.5E-34;1.6E-33;2.5E-33;4.5E-33;4.9E-33;1.0E-32;1.6E-32;1.6E-32;2.8E-32;4.1E-32;4.7E-32;5.1E-32;5.7E-32;7.0E-32;9.8E-32	alpha/beta fold hydrolase [Streptomyces sp. I05A-00742]	7.1e-37	229	232	7	236	50.43
MGYP000907820389	alpha/beta hydrolase	271	4.8E-116;1.2E-95;2.0E-92;5.4E-92;6.7E-92;1.1E-91;3.7E-91;4.4E-91;5.6E-91;6.2E-91;9.1E-91;1.1E-90;1.2E-90;1.6E-90;1.8E-90;2.3E-90;5.4E-90;1.1E-89;1.1E-89;3.6E-89	alpha/beta hydrolase [Ruminiclostridium herbifermentans]	4.8e-116	269	269	4	271	75.46
MGYP000909772512	alpha/beta hydrolase	329	4.5E-109;8.5E-109;1.8E-108;2.7E-105;6.3E-86;1.2E-85;1.3E-84;4.1E-83;6.1E-73;8.3E-34;2.3E-33;3.0E-33;5.8E-33;2.1E-32;3.2E-32;7.3E-32;2.8E-31;4.4E-31;9.3E-31;1.1E-30	alpha/beta hydrolase [Flavobacterium cupreum]	4.5e-109	349	303	26	328	68.98
MGYP000911167073	phospholipase A1-Ibeta2, chloroplastic-like	241	6.6E-166;6.6E-166;6.6E-166;9.4E-166;9.4E-166;1.5E-164;2.2E-164;2.2E-164;7.3E-158;8.2E-142;3.6E-138;8.1E-131;4.1E-128;6.7E-127;4.4E-126;4.4E-126;4.0E-124;6.4E-124;7.4E-124;2.0E-123	phospholipase A1-Ibeta2, chloroplastic-like [Triticum dicoccoides]	6.6e-166	539	241	1	241	99.59
MGYP000911661891	alpha/beta hydrolase	368	2.7E-151;2.2E-150;3.6E-149;9.5E-149;5.4E-148;8.9E-147;1.4E-146;7.3E-146;7.3E-146;1.0E-145;7.3E-144;1.5E-143;1.9E-142;2.4E-142;2.4E-142;1.5E-141;2.0E-141;2.3E-140;3.4E-140;2.6E-137	alpha/beta hydrolase [Neobacillus sp. PS3-34]	2.7e-151	374	376	1	368	72.61
MGYP000911934339	alpha/beta fold hydrolase	324	4.5E-46;1.5E-42;6.0E-42;7.5E-42;3.7E-40;5.7E-40;1.1E-37;5.1E-37;1.6E-35;3.0E-35;6.2E-35;7.3E-35;8.7E-35;1.1E-34;5.2E-34;7.1E-34;7.4E-34;7.6E-34;8.8E-34;2.2E-33	alpha/beta fold hydrolase [Flavipsychrobacter sp. JY13-12]	4.5e-46	309	306	12	315	54.25
MGYP000912392713	alpha/beta fold hydrolase	251	4.2E-86;1.8E-82;6.7E-80;1.3E-79;1.3E-79;1.9E-79;2.6E-79;2.7E-79;3.0E-79;3.1E-79;3.8E-79;5.6E-79;1.1E-78;1.1E-78;1.1E-78;1.1E-78;1.5E-78;1.5E-78;1.5E-78;1.5E-78	alpha/beta fold hydrolase [Hyalangium sp. s54d21]	4.2e-86	262	246	5	248	69.92
MGYP000912435634	alpha/beta hydrolase	278	2.0E-56;2.7E-54;2.3E-53;3.0E-53;4.4E-53;1.9E-52;7.0E-52;7.7E-52;5.0E-50;1.9E-48;9.8E-48;1.4E-47;5.0E-44;1.1E-39;1.6E-37;2.7E-35;2.8E-34;1.2E-32;1.1E-28;2.8E-28	alpha/beta hydrolase [Spirochaeta lutea]	2e-56	269	264	1	264	59.85
MGYP000912460747	hypothetical protein	248	1.4E-124;4.7E-106;2.0E-101;1.6E-100;4.2E-67;4.2E-67;2.4E-66;1.6E-65;2.7E-65;3.9E-65;5.9E-65;1.7E-64;2.2E-64;1.1E-62;1.1E-62;8.1E-58;5.7E-51;5.0E-50;1.2E-49;4.4E-48	hypothetical protein [Nocardioides sp.]	1.4e-124	324	240	1	240	84.58
MGYP000913825965	alpha/beta fold hydrolase	260	6.8E-108;4.0E-102;5.7E-102;3.3E-101;4.7E-101;1.3E-93;7.9E-93;1.6E-84;1.5E-82;2.4E-81;1.4E-78;1.9E-77;1.9E-77;2.3E-77;8.4E-77;1.5E-76;1.5E-76;1.6E-76;3.1E-76;4.7E-76	alpha/beta fold hydrolase [Pinisolibacter aquiterrae]	6.8e-108	257	258	1	257	74.42
MGYP000914459088	alpha/beta hydrolase	264	3.6E-74;4.4E-63;1.3E-62;1.8E-62;2.4E-62;6.7E-62;1.1E-61;2.0E-61;3.7E-61;4.0E-61;5.7E-61;6.7E-61;7.9E-61;8.1E-61;8.1E-61;1.1E-60;1.2E-60;1.2E-60;1.2E-60;1.4E-60	alpha/beta hydrolase [Lewinella cohaerens]	3.6e-74	267	258	4	260	66.28
MGYP000914915000	alpha/beta hydrolase	311	8.3E-225;1.2E-224;3.4E-224;9.7E-224;3.2E-222;4.6E-222;4.6E-222;4.6E-222;4.6E-222;9.3E-222;9.3E-222;9.3E-222;1.3E-221;1.3E-221;1.3E-221;1.3E-221;1.3E-221;1.3E-221;1.3E-221;1.3E-221	alpha/beta hydrolase [Lactococcus lactis]	8.3e-225	311	311	1	311	100
MGYP000917335924	alpha/beta hydrolase	294	3.5E-93;1.4E-92;1.6E-91;3.7E-90;5.2E-90;3.1E-89;8.5E-89;8.5E-89;1.4E-88;2.5E-88;3.4E-88;4.9E-88;5.0E-88;6.9E-88;9.7E-88;1.4E-87;1.4E-87;2.0E-87;2.0E-87;2.8E-87	alpha/beta hydrolase [Pseudoleptotrichia goodfellowii]	3.5e-93	291	272	23	292	69.49
MGYP000917572923	alpha/beta hydrolase	258	2.0E-96;1.3E-81;6.1E-80;3.6E-79;3.9E-78;8.0E-78;7.0E-76;7.5E-76;6.0E-75;2.4E-74;2.5E-74;4.7E-74;1.3E-72;2.4E-72;1.4E-71;1.8E-71;9.2E-71;5.6E-70;1.5E-68;1.9E-65	alpha/beta hydrolase [Candidatus Entotheonella palauensis]	2e-96	265	242	18	257	73.14
MGYP000918230276	phospholipase A1 PLIP1, chloroplastic-like	206	4.1E-139;4.1E-139;4.1E-139;4.1E-139;5.7E-139;5.7E-139;5.7E-139;5.7E-139;1.9E-138;7.6E-138;3.6E-137;8.0E-127;3.0E-126;5.7E-123;1.2E-122;1.3E-121;1.2E-119;3.8E-116;4.0E-116;8.2E-115	phospholipase A1 PLIP1, chloroplastic-like [Triticum dicoccoides]	4.1e-139	675	206	1	206	98.54
MGYP000920355695	alpha/beta hydrolase	255	4.7E-65;1.2E-64;1.4E-63;1.5E-63;2.1E-63;4.2E-63;4.2E-63;5.9E-63;3.4E-62;7.0E-61;2.0E-60;2.1E-60;3.0E-60;1.2E-59;1.3E-59;2.2E-59;2.7E-59;5.0E-59;5.1E-59;5.9E-59	alpha/beta hydrolase [Persicobacter sp. CCB-QB2]	4.7e-65	258	253	6	254	60.47
MGYP000920367630	alpha/beta hydrolase	260	1.2E-47;2.1E-43;6.7E-43;7.5E-43;2.4E-42;2.4E-42;3.6E-42;5.1E-16	alpha/beta hydrolase [Tengunoibacter tsumagoiensis]	1.2e-47	297	245	13	254	53.06
MGYP000920415081	alpha/beta fold hydrolase	347	8.8E-91;1.2E-87;1.6E-86;3.6E-81;4.5E-78;1.1E-77;3.0E-75;1.2E-74;1.8E-74;2.2E-72;4.5E-71;6.7E-62;1.2E-61;3.6E-61;4.9E-61;5.3E-61;1.3E-60;1.4E-60;2.0E-60;4.0E-60	alpha/beta fold hydrolase [Terrabacter tumescens]	8.8e-91	407	349	3	347	61.32
MGYP000921103629	alpha/beta hydrolase	296	4.9E-36;2.4E-33;4.3E-32;4.4E-31;1.3E-30;3.2E-30;3.4E-30;8.4E-30;1.3E-29;1.3E-29;1.4E-29;1.4E-29;5.7E-29;6.5E-29;6.6E-29;6.8E-29;1.7E-28;1.7E-28;1.8E-28;2.5E-28	alpha/beta hydrolase [Bordetella genomosp. 10]	4.9e-36	284	264	2	261	50.38
MGYP000921775222	alpha/beta hydrolase	272	1.5E-75;6.6E-75;6.7E-74;2.9E-73;3.6E-73;3.8E-72;8.7E-72;1.3E-71;2.8E-71;2.0E-70;2.1E-70;2.7E-70;5.3E-70;2.8E-69;3.2E-69;1.9E-68;6.7E-68;2.4E-66;3.4E-66;4.9E-66	alpha/beta hydrolase [Variovorax sp. YR216]	1.5e-75	277	258	6	263	62.4
MGYP000922351147	TIR domain-containing protein	359	1.3E-261;1.0E-131;3.6E-34;2.0E-33;1.7E-31;4.6E-28;2.5E-27;5.2E-27;8.8E-27;3.1E-26;5.9E-26;1.6E-25;2.6E-25;3.5E-25;1.2E-24;1.4E-24;2.5E-24;3.6E-24;5.2E-24;6.8E-24	TIR domain-containing protein [Accumulibacter sp.]	1.3e-261	359	359	1	359	100
MGYP000923012445	alpha/beta hydrolase	326	1.8E-68;6.1E-66;1.8E-65;1.2E-64;1.2E-63;1.6E-61;9.0E-61;2.0E-59;3.9E-59;7.9E-59;2.7E-58;3.7E-58;1.6E-57;2.2E-57;4.2E-57;6.3E-57;1.1E-56;1.1E-56;3.5E-56;4.1E-56	alpha/beta hydrolase [Methanofollis aquaemaris]	1.8e-68	355	256	69	324	66.02
MGYP000923689198	lipase family protein	347	1.4E-241;5.5E-141;9.4E-140;1.1E-138;8.4E-134;2.1E-114;4.8E-112;1.2E-87;5.8E-37;1.5E-36;2.1E-36;2.1E-36;2.1E-36;2.1E-36;5.6E-36;5.6E-36;6.5E-36;1.1E-35;1.6E-35;1.8E-35	lipase family protein [Aminipila luticellarii]	1.4e-241	347	347	1	347	99.14
MGYP000923742279	3-oxoadipate enol-lactonase	260	2.7E-184;1.3E-175;1.3E-175;3.8E-175;5.4E-175;7.6E-175;7.6E-175;3.1E-174;2.1E-172;3.0E-172;8.5E-172;3.5E-171;3.5E-171;7.0E-171;7.0E-171;9.9E-171;1.4E-170;1.4E-170;2.0E-170;2.0E-170	3-oxoadipate enol-lactonase [Bradyrhizobium sp.]	2.7e-184	260	259	1	259	98.46
MGYP000923781061	alpha/beta fold hydrolase	234	6.8E-75;9.0E-73;8.4E-71;2.8E-69;2.9E-69;3.9E-69;7.9E-69;1.1E-68;1.9E-68;1.9E-68;1.9E-68;3.2E-68;3.7E-68;3.9E-68;7.0E-68;9.4E-68;1.8E-67;2.1E-67;2.4E-67;3.9E-67	alpha/beta fold hydrolase [Flavobacterium magnum]	6.8e-75	227	224	9	232	71.43
MGYP000923844982	triacylglycerol lipase	166	1.0E-42;5.8E-42;2.4E-41;5.4E-40;5.4E-40;7.7E-40;3.1E-39;3.2E-39;3.2E-39;3.5E-39;4.4E-39;5.4E-39;5.8E-39;8.0E-39;1.7E-38;1.7E-38;1.9E-38;2.5E-38;3.1E-38;3.5E-38	triacylglycerol lipase [Microbispora sp. ATCC PTA-5024]	1e-42	224	167	1	164	62.87
MGYP000924064670	alpha/beta hydrolase	198	9.4E-30;3.9E-27;4.6E-27;4.6E-26;5.1E-26;2.6E-22;7.7E-19;1.5E-17;1.0E-16;2.7E-16;2.7E-16;3.3E-16;6.0E-16;6.6E-16;9.8E-16	alpha/beta hydrolase [Pelotomaculum isophthalicicum]	9.4e-30	255	204	1	198	53.43
MGYP000924448070	alpha/beta fold hydrolase	289	1.5E-163;4.4E-133;1.4E-130;1.8E-115;9.8E-115;1.6E-113;2.1E-109;5.2E-99;1.9E-97;2.1E-96;3.5E-91;5.0E-91;7.1E-91;7.3E-91;1.0E-90;2.0E-90;8.1E-90;2.6E-89;2.7E-88;1.0E-87	alpha/beta fold hydrolase [Nocardioides sp.]	1.5e-163	306	279	2	277	87.81
MGYP000925991238	hypothetical protein SAMD00019534_093820, partial	317	6.2E-23;5.5E-19;6.1E-18;7.6E-18;1.4E-17;1.7E-17;2.1E-17;3.9E-17;5.3E-17;5.3E-17;8.4E-17;8.4E-17;1.6E-16;1.8E-16;2.4E-16;5.2E-16;7.4E-16	hypothetical protein SAMD00019534_093820, partial [Acytostelium subglobosum LB1]	6.2e-23	295	178	132	307	50
MGYP000926765929	alpha/beta hydrolase	438	2.0E-170;1.9E-165;1.9E-164;6.0E-163;8.5E-163;2.0E-162;4.9E-162;2.6E-159;2.6E-159;3.7E-159;6.0E-158;6.0E-158;1.6E-157;4.9E-157;9.9E-157;1.1E-156;2.2E-156;2.8E-156;2.8E-156;3.0E-156	alpha/beta hydrolase [Chelatococcus reniformis]	2e-170	440	406	20	425	76.85
MGYP000927366877	MULTISPECIES: alpha/beta hydrolase	291	6.0E-115;1.7E-111;1.8E-92;3.9E-91;5.4E-86;5.4E-81;3.9E-78;9.6E-77;1.4E-76;2.7E-76;3.6E-74;2.8E-73;6.2E-73;6.3E-72;2.6E-71;2.7E-71;3.0E-71;9.0E-71;9.2E-71;1.0E-70	MULTISPECIES: alpha/beta hydrolase [Microthrix]	6e-115	290	265	19	283	79.25
MGYP000927426799	alpha/beta fold hydrolase	318	3.6E-22;2.5E-20;4.4E-20;1.6E-19;1.2E-17;1.2E-17;1.2E-17;1.2E-17;2.2E-17;3.6E-17;5.7E-17;5.9E-17;8.1E-17;8.9E-17;1.5E-16;2.1E-16;3.0E-16;4.1E-16;4.6E-16;6.5E-16	alpha/beta fold hydrolase [Actinophytocola sp.]	3.6e-22	234	220	52	260	51.82
MGYP000927448353	lipase	298	3.9E-19;4.0E-17;5.6E-17;1.0E-16;1.3E-16;3.3E-16	lipase [Halteromyces radiatus]	3.9e-19	364	178	77	246	50.56
MGYP000927572141	alpha/beta fold hydrolase	228	1.4E-29;4.6E-28;9.2E-28;1.3E-27;2.3E-27;2.3E-27;5.7E-27;1.2E-24;7.3E-24;4.9E-23;6.1E-23;1.6E-22;1.9E-22;5.2E-22;7.1E-22;2.1E-21;2.8E-21;2.8E-21;2.8E-21;3.6E-21	alpha/beta fold hydrolase [Longimicrobium terrae]	1.4e-29	247	222	2	220	50.9
MGYP000928093059	lipase family protein	291	3.9E-77;5.1E-70;2.9E-66;4.9E-58;1.3E-57;1.9E-32;4.8E-31;1.9E-29;1.0E-28;1.3E-28;1.6E-28;1.6E-28;3.4E-28;8.4E-28;3.9E-27;4.0E-27;6.0E-27;9.6E-27;1.3E-26;3.8E-26	lipase family protein [Luteolibacter ambystomatis]	3.9e-77	307	305	4	286	59.34
MGYP000928123617	alpha/beta fold hydrolase, partial	275	1.7E-32;1.9E-29;1.1E-28;1.8E-28;1.9E-28;2.0E-28;2.7E-28;5.3E-28;6.3E-28;8.3E-28;1.4E-27;1.4E-27;1.8E-27;1.9E-27;2.4E-27;2.8E-27;3.9E-27;4.0E-27;5.0E-27;5.3E-27	alpha/beta fold hydrolase, partial [Pseudonocardia pini]	1.7e-32	266	200	74	267	57.5
MGYP000930061514	alpha/beta hydrolase	311	5.6E-75;3.5E-74;5.2E-72;5.6E-72;5.7E-64;5.6E-53;1.3E-52;4.5E-52;4.9E-51;4.9E-51;1.6E-48;2.2E-48;2.3E-48;2.6E-47;1.1E-46;2.7E-46;2.8E-46;6.7E-46;7.9E-46;1.2E-45	alpha/beta hydrolase [Desulfosporosinus youngiae]	5.6e-75	299	285	26	309	63.86
MGYP000930258164	lipase	314	1.0E-130;1.4E-130;1.4E-130;1.4E-130;5.8E-130;8.3E-130;8.3E-130;2.4E-129;6.8E-129;1.4E-128;1.4E-128;3.3E-128;1.2E-127;2.2E-127;2.9E-127;5.0E-127;6.9E-127;2.5E-126;3.6E-126;4.4E-126	lipase [Aspergillus saccharolyticus JOP 1030-1]	1e-130	277	277	33	308	81.23
MGYP000930316436	alpha/beta hydrolase	242	6.3E-78;1.2E-56;4.0E-56;1.5E-54;2.0E-53;9.8E-53;1.4E-52;2.4E-52;4.8E-52;2.8E-51;1.2E-50;1.7E-50;2.0E-50;2.2E-50;3.2E-50;3.2E-50;3.4E-50;3.7E-50;4.5E-50;8.7E-50	alpha/beta hydrolase [Syntrophorhabdus aromaticivorans]	6.3e-78	250	236	3	238	69.49
MGYP000930755370	alpha/beta hydrolase	266	2.0E-173;4.0E-173;1.6E-172;1.6E-172;2.3E-172;2.3E-172;9.5E-172;1.3E-169;1.4E-131;1.1E-128;1.1E-128;1.5E-128;3.1E-128;4.4E-128;4.4E-128;6.2E-128;8.8E-128;8.8E-128;1.2E-127;1.8E-127	alpha/beta hydrolase [Comamonas sp. UBA7528]	2e-173	266	266	1	266	92.86
MGYP000931001638	hypothetical protein	328	1.7E-185;2.3E-183;9.0E-182;3.2E-181;4.8E-181;6.4E-181;3.5E-180;5.2E-180;3.0E-179;3.1E-179;8.0E-179;6.6E-178;9.7E-178;1.5E-177;5.4E-177;7.6E-177;1.6E-174;1.3E-173;1.1E-172;4.2E-170	hypothetical protein [Variovorax sp. Sphag1AA]	1.7e-185	331	328	1	327	86.28
MGYP000931110035	alpha/beta fold hydrolase	240	2.3E-166;9.4E-166;2.6E-149;1.5E-148;1.5E-148;1.9E-148;4.4E-148;4.7E-142;5.4E-142;6.6E-142;6.2E-141;6.9E-141;1.4E-140;1.5E-140;1.5E-140;2.7E-135;3.1E-134;6.4E-131;5.3E-130;1.5E-127	alpha/beta fold hydrolase [Janibacter anophelis]	2.3e-166	308	240	1	240	100
MGYP000931724849	alpha/beta hydrolase	274	1.4E-124;1.5E-120;1.7E-119;2.0E-119;8.3E-119;7.9E-117;6.4E-116;2.3E-114;2.0E-110;3.8E-109;2.0E-105;1.4E-85;1.1E-84;5.6E-83;2.9E-82;3.4E-82;8.3E-82;5.3E-80;5.4E-80;7.5E-80	alpha/beta hydrolase [Schnuerera sp. xch1]	1.4e-124	265	265	1	265	79.62
MGYP000932421787	alpha/beta hydrolase	305	6.4E-79;2.1E-78;2.0E-77;8.6E-71;3.6E-28;1.7E-26;4.7E-26;2.5E-25;7.5E-25;3.9E-24;4.7E-24;9.9E-24;2.0E-23;2.8E-23;5.6E-23;8.3E-23;1.1E-20;1.6E-20;2.1E-20;5.5E-20	alpha/beta hydrolase [Flavobacterium sp.]	6.4e-79	304	297	9	299	62.63
MGYP000932431326	alpha/beta hydrolase	266	1.2E-34;2.3E-33;3.2E-33;9.2E-33;9.4E-33;1.9E-32;3.8E-32;8.3E-32;1.6E-31;2.2E-31;6.1E-31;7.8E-31;1.1E-30;1.2E-30;1.2E-30;2.9E-30;3.0E-30;3.0E-30;3.3E-30;6.3E-30	alpha/beta hydrolase [Dendronalium phyllosphericum]	1.2e-34	270	264	1	261	51.52
MGYP000932436253	alpha/beta fold hydrolase	256	2.3E-103;3.8E-98;3.6E-69;4.3E-53;4.4E-53;4.4E-53;6.1E-53;6.1E-53;8.7E-53;8.7E-53;1.2E-52;1.7E-52;2.4E-52;3.4E-52;9.3E-52;1.6E-51;1.8E-51;2.4E-51;2.6E-51;3.6E-51	alpha/beta fold hydrolase [Anaeroplasma bactoclasticum]	2.3e-103	260	258	2	256	75.19
MGYP000932697703	alpha/beta hydrolase	291	3.6E-209;1.9E-186;3.7E-186;2.2E-185;3.0E-176;4.0E-151;1.2E-150;2.3E-150;2.3E-150;4.7E-150;4.7E-150;9.4E-150;1.3E-149;3.8E-149;5.4E-149;5.4E-149;5.4E-149;7.7E-149;1.6E-148;1.6E-148	alpha/beta hydrolase [Leptotrichia sp. oral taxon 212]	3.6e-209	291	291	1	291	99.31
MGYP000933060981	alpha/beta-hydrolase	304	2.1E-146;3.2E-140;7.3E-133;6.9E-125;1.3E-103;3.5E-103;5.4E-103;7.9E-103;2.2E-102;4.5E-102;8.7E-102;7.1E-101;7.1E-101;9.1E-101;2.0E-100;1.1E-99;1.1E-99;7.0E-99;7.0E-99;3.4E-98	alpha/beta-hydrolase [Aureobasidium namibiae CBS 147.97]	2.1e-146	326	305	1	303	80.98
MGYP000933624661	alpha/beta fold hydrolase	274	4.2E-98;4.4E-90;8.8E-90;8.8E-90;1.3E-89;1.3E-89;1.3E-89;1.3E-89;1.6E-89;1.8E-89;1.8E-89;1.8E-89;2.5E-89;2.5E-89;2.6E-89;2.6E-89;2.6E-89;3.5E-89;3.6E-89;3.6E-89	alpha/beta fold hydrolase [Breznakiella homolactica]	4.2e-98	267	265	9	273	71.7
MGYP000935375649	predicted protein	284	3.0E-85;3.6E-29;3.9E-25;9.9E-22	predicted protein [Thalassiosira pseudonana CCMP1335]	3e-85	1003	254	43	279	71.65
MGYP000935733582	uncharacterized protein GSPATT00014854001	393	3.9E-36;4.2E-34;2.2E-33;1.2E-32;5.7E-32;2.7E-30;1.7E-29;2.7E-27;2.9E-27;6.1E-27;1.6E-26;5.6E-25;7.0E-24;1.4E-23;3.3E-23;6.8E-23;8.2E-23;1.1E-22;2.4E-22;5.4E-22	uncharacterized protein GSPATT00014854001 [Paramecium tetraurelia]	3.9e-36	289	279	110	378	50.9
MGYP000938762317	lipase family protein	226	6.0E-102;1.2E-94;2.5E-94;2.3E-92;7.6E-91;1.6E-88;3.2E-88;8.1E-88;2.5E-86;3.0E-83;1.2E-82;3.5E-82;4.9E-82;2.8E-81;1.5E-33;4.0E-33;3.7E-31;5.0E-31;3.9E-30;3.6E-27	lipase family protein [Hydrogenoanaerobacterium sp.]	6e-102	225	223	1	223	77.58
MGYP000938900223	alpha/beta fold hydrolase	300	8.3E-99;3.5E-97;6.7E-97;1.9E-96;1.0E-50;4.6E-47;6.9E-47;8.1E-47;2.0E-44;3.9E-44;7.6E-44;1.5E-43;1.6E-43;5.4E-43;1.2E-42;1.2E-42;1.2E-42;1.2E-42;1.4E-42;2.6E-42	alpha/beta fold hydrolase [Nitrospina gracilis]	8.3e-99	326	294	8	300	68.37
MGYP000939378666	lipase family protein [	162	4.4E-21;4.8E-21;4.4E-20;9.2E-20;1.2E-19;1.3E-19;1.3E-19;2.0E-19;4.4E-19;1.2E-18;1.2E-18;1.5E-18;1.7E-18;2.0E-18;5.3E-18;8.0E-18;8.0E-18;1.8E-17;1.9E-17;2.0E-17	lipase family protein [[Limnothrix rosea] IAM M-220]	4.4e-21	273	171	1	161	50.29
MGYP000940713649	alpha/beta hydrolase	222	1.1E-41;1.4E-34;1.8E-33;2.6E-32;5.4E-17	alpha/beta hydrolase [Oscillochloris sp. ZM17-4]	1.1e-41	276	222	1	221	55.41
MGYP000940900470	alpha/beta hydrolase	258	6.9E-52;3.5E-51;9.0E-51;8.2E-50;1.6E-49;1.9E-49;2.3E-49;4.2E-49;7.1E-49;7.1E-49;9.1E-49;2.1E-48;2.8E-48;3.7E-48;5.6E-48;5.6E-48;5.6E-48;6.8E-48;6.8E-48;7.9E-48	alpha/beta hydrolase [Scatolibacter rhodanostii]	6.9e-52	308	254	3	255	61.02
MGYP000941563475	alpha/beta fold hydrolase	200	2.1E-133;2.4E-132;1.4E-131;1.3E-122;7.5E-122;1.0E-119;5.2E-94;1.1E-93;1.5E-93;2.1E-93;2.1E-93;3.0E-93;4.3E-93;4.1E-91;4.6E-79;1.6E-78;3.3E-78;3.2E-77;5.3E-77;1.4E-76	alpha/beta fold hydrolase [Pseudoclavibacter sp. JAI123]	2.1e-133	258	200	1	200	99.5
MGYP000941935608	pectate lyase-like adhesive domain-containing protein	174	3.3E-56;1.4E-52;1.8E-52;6.2E-52;2.3E-51;1.0E-50;1.3E-50;1.3E-49;2.2E-49;3.2E-49;3.6E-49;5.8E-49;1.1E-48;1.5E-48;1.5E-48;2.9E-48;3.8E-48;4.4E-48;1.3E-47;1.4E-47	pectate lyase-like adhesive domain-containing protein [Lactococcus plantarum]	3.3e-56	1589	175	1	174	71.43
MGYP000942791524	alpha/beta fold hydrolase	308	6.1E-188;8.7E-188;5.0E-187;1.8E-113;2.5E-113;2.0E-111;2.2E-101;8.8E-101;1.9E-96;2.6E-96;4.1E-96;4.7E-96;7.2E-96;1.0E-95;2.6E-95;3.6E-95;1.0E-94;1.0E-94;1.6E-94;4.2E-94	alpha/beta fold hydrolase [Curvibacter lanceolatus]	6.1e-188	304	303	1	303	89.44
MGYP000942826196	alpha/beta fold hydrolase	241	7.3E-35;2.2E-34;1.7E-33;7.1E-33;2.7E-32;1.3E-31;2.7E-31;2.7E-31;4.2E-31;4.9E-31;5.0E-31;8.4E-31;1.2E-30;1.4E-30;1.6E-30;3.0E-30;3.9E-30;3.9E-30;4.7E-30;5.5E-30	alpha/beta fold hydrolase [Streptomyces sp. H39-S7]	7.3e-35	225	204	25	226	56.86
MGYP000942952598	alpha/beta hydrolase	229	3.7E-49;1.4E-47;2.6E-46;3.5E-46;5.9E-46;8.8E-46;1.2E-45;2.5E-45;5.0E-45;5.4E-45;5.6E-45;6.6E-45;1.1E-44;1.6E-44;1.9E-44;2.2E-44;2.2E-44;2.2E-44;3.0E-44;3.4E-43	alpha/beta hydrolase [Pontibacter vulgaris]	3.7e-49	235	226	4	229	61.06
MGYP000943465980	alpha/beta fold hydrolase	215	5.6E-43;1.9E-42;2.0E-42;2.5E-42;4.9E-42;4.9E-42;5.4E-42;5.5E-42;5.9E-41;8.4E-41;8.8E-41;4.9E-40;8.5E-40;1.2E-39;3.4E-39;4.1E-39;4.2E-39;4.2E-39;5.0E-39;5.2E-39	alpha/beta fold hydrolase [Fluoribacter dumoffii]	5.6e-43	265	200	14	213	59
MGYP000943575155	triacylglycerol lipase	211	9.8E-105;2.0E-97;2.8E-97;1.6E-96;1.6E-96;2.6E-90;1.5E-79;5.0E-78;4.4E-56;2.9E-55;1.6E-54;4.6E-54;4.6E-54;9.1E-54;9.1E-54;1.0E-53;1.0E-53;1.4E-53;4.0E-53;8.0E-53	triacylglycerol lipase [Agitococcus lubricus]	9.8e-105	311	211	1	211	86.26
MGYP000945071211	lipase family protein	262	4.6E-112;6.6E-112;2.6E-106;3.6E-105;6.4E-101;5.0E-95;4.6E-85;6.4E-85;6.6E-83;4.7E-77;2.3E-75;4.1E-75;6.2E-73;3.7E-72;1.6E-59;2.7E-33;4.2E-33;1.3E-22;1.5E-20;2.1E-20	lipase family protein [Pseudomonas sp. SH10-3B]	4.6e-112	271	251	12	261	78.49
MGYP000945568110	uncharacterized protein GSPATT00021619001	263	4.4E-23;5.1E-23;5.6E-23;1.7E-20;3.7E-20;4.2E-20;1.0E-19;1.2E-19;1.2E-19;1.6E-18;1.9E-18;2.1E-18;3.4E-18;4.8E-18;8.0E-18;1.7E-17;1.7E-17;3.1E-17;3.1E-17;4.4E-17	uncharacterized protein GSPATT00021619001 [Paramecium tetraurelia]	4.4e-23	270	201	18	216	53.23
MGYP000945758385	alpha/beta fold hydrolase	282	7.0E-49;3.6E-29;3.9E-29;1.1E-28;1.4E-28;2.0E-27;2.5E-27;5.4E-27;1.1E-25;1.6E-25;1.7E-25;1.8E-25;1.8E-25;4.9E-25;4.9E-25;9.9E-25;1.3E-24;3.1E-24;5.4E-24;6.9E-24	alpha/beta fold hydrolase [Desulfatiglans anilini]	7e-49	269	279	4	278	55.56
MGYP000946399915	alpha/beta hydrolase	229	1.2E-72;2.6E-71;7.0E-71;8.4E-70;3.7E-69;8.6E-68;1.1E-67;5.9E-67;7.9E-67;1.8E-66;5.1E-66;2.9E-65;7.3E-65;1.2E-64;4.2E-64;4.2E-64;5.2E-64;5.9E-64;7.9E-64;1.7E-63	alpha/beta hydrolase [Longitalea luteola]	1.2e-72	231	229	1	229	68.12
MGYP000946473413	alpha/beta fold hydrolase	175	1.7E-18;1.5E-16	alpha/beta fold hydrolase [Marinobacter caseinilyticus]	1.7e-18	227	140	5	144	60
MGYP000946539487	alpha/beta hydrolase	266	4.3E-127;5.9E-40;2.3E-39;3.3E-39;6.5E-39;1.8E-38;3.6E-38;3.6E-38;3.6E-38;3.6E-38;5.1E-38;7.2E-38;7.2E-38;7.2E-38;1.4E-37;1.4E-37;2.0E-37;2.0E-37;2.8E-37;2.8E-37	alpha/beta hydrolase [Pseudorhodoplanes sp.]	4.3e-127	268	266	1	266	81.2
MGYP000946998105	alpha/beta hydrolase	289	1.8E-145;4.1E-142;2.6E-115;5.2E-115;3.4E-55;4.0E-55;6.9E-55;7.7E-55;8.3E-55;1.1E-54;5.0E-54;1.1E-52;2.3E-52;4.6E-52;6.5E-52;9.1E-52;1.3E-51;1.6E-51;1.8E-51;5.1E-51	alpha/beta hydrolase [Tractidigestivibacter sp.]	1.8e-145	295	272	17	288	84.19
MGYP000947189844	alpha/beta fold hydrolase	226	2.4E-79;3.4E-79;4.8E-79;6.8E-79;1.8E-78;2.7E-78;3.6E-78;8.9E-78;1.1E-77;1.2E-77;1.6E-77;6.2E-77;6.4E-77;2.6E-76;5.5E-76;1.1E-75;3.2E-75;8.7E-75;1.2E-74;1.4E-74	alpha/beta fold hydrolase [Pontibacter sp. HSC-36F09]	2.4e-79	232	225	2	226	71.56
MGYP000947242678	alpha/beta hydrolase	200	2.5E-107;4.8E-27;1.3E-19;3.3E-18;4.1E-18;4.6E-18;4.6E-18;5.2E-18;6.5E-18;1.2E-17;1.2E-17;1.4E-17;1.5E-17;1.7E-17;1.7E-17;2.9E-17;3.0E-17;3.2E-17;3.5E-17;4.4E-17	alpha/beta hydrolase [Turneriella parva]	2.5e-107	200	199	1	199	87.44
MGYP000947335862	alpha/beta fold hydrolase	267	4.2E-27;1.4E-24;1.6E-24;2.1E-23;2.6E-23;2.9E-23;3.6E-23;4.4E-23;4.7E-23;6.2E-23;2.5E-22;4.2E-22;5.4E-22;1.6E-21;1.9E-20;7.0E-20;7.2E-20;8.1E-20;4.0E-19;1.2E-18	alpha/beta fold hydrolase [Methanospirillum hungatei]	4.2e-27	1766	183	66	239	56.28
MGYP000947691601	alpha/beta hydrolase	263	8.7E-187;3.5E-186;8.6E-162;5.1E-81;2.3E-80;1.5E-63;2.1E-59;5.9E-59;1.4E-50;8.0E-47;3.6E-46;3.1E-43;3.2E-43;3.2E-43;3.3E-42;3.5E-42;1.8E-41;2.3E-41;9.7E-41;1.4E-40	alpha/beta hydrolase [Desulfovibrio sp.]	8.7e-187	263	263	1	263	99.62
MGYP000948408190	triacylglycerol lipase	321	1.5E-232;7.1E-231;2.4E-229;4.9E-213;2.8E-212;1.3E-208;5.2E-208;5.2E-208;7.4E-208;1.1E-207;2.1E-207;6.1E-207;4.1E-205;4.6E-202;5.3E-201;1.5E-200;1.2E-199;1.8E-199;4.0E-196;1.3E-194	triacylglycerol lipase [Acinetobacter sp. ANC 4862]	1.5e-232	321	321	1	321	100
MGYP000948417756	alpha/beta hydrolase fold domain-containing protein	313	3.6E-200;4.7E-140;8.2E-136;2.0E-124;4.3E-113;6.1E-112;2.5E-111;2.5E-111;2.5E-111;4.0E-110;5.7E-110;1.8E-109;2.3E-109;2.9E-101;8.8E-99;2.2E-66;1.4E-63;3.8E-60;5.1E-59;1.9E-58	alpha/beta hydrolase fold domain-containing protein [Lacticaseibacillus sp. KACC 23028]	3.6e-200	315	313	1	313	94.57
MGYP000950503576	alpha/beta hydrolase	263	5.6E-29;1.2E-26;1.5E-23;1.6E-23	alpha/beta hydrolase [Schlesneria paludicola]	5.6e-29	279	226	31	246	50.88
MGYP000950703195	alpha/beta fold hydrolase	323	7.5E-243;3.1E-242;1.5E-205;7.9E-205;9.8E-204;5.1E-200;1.2E-120;1.7E-120;2.2E-120;6.6E-115;1.6E-113;1.9E-112;1.4E-111;1.5E-108;1.6E-108;8.8E-108;9.1E-108;1.8E-107;5.4E-107;7.1E-107	alpha/beta fold hydrolase [Dietzia sp. UBA5065]	7.5e-243	323	323	1	323	100
MGYP000951234911	alpha/beta hydrolase	240	5.8E-29;4.8E-28;1.8E-27;6.0E-27;3.2E-24;2.3E-23;1.8E-18;8.7E-17;1.3E-16;1.8E-16;1.8E-16;1.8E-16;2.4E-16;2.5E-16;3.4E-16;4.7E-16;5.0E-16;6.9E-16;6.9E-16;9.1E-16	alpha/beta hydrolase [Paenibacillus terricola]	5.8e-29	264	208	8	215	51.92
MGYP000952139530	alpha/beta hydrolase	320	3.3E-71;6.4E-68;2.9E-40;1.2E-39;1.7E-39;2.7E-39;3.4E-39;5.1E-38;1.2E-35;1.8E-34;4.5E-34;9.4E-34;6.0E-31;8.1E-31;8.2E-31;1.1E-30;3.9E-30;1.6E-29;2.2E-29;2.9E-29	alpha/beta hydrolase [Pyxidicoccus parkwaysis]	3.3e-71	289	290	32	320	60
MGYP000952822713	AcvB/VirJ family lysyl-phosphatidylglycerol hydrolase	219	3.5E-62;3.6E-60;6.5E-57;8.5E-57;9.5E-57;1.3E-54;1.5E-53;6.9E-53;1.7E-52;2.0E-52;3.9E-52;4.2E-52;5.7E-52;7.8E-52;2.5E-51;4.5E-51;8.9E-51;1.5E-50;1.2E-49;3.3E-48	AcvB/VirJ family lysyl-phosphatidylglycerol hydrolase [Niabella ginsenosidivorans]	3.5e-62	221	211	9	219	66.35
MGYP000953102686	alpha/beta hydrolase	300	5.6E-213;1.1E-210;1.1E-210;2.5E-210;4.4E-210;7.9E-159;3.2E-158;3.2E-158;4.6E-158;6.5E-158;9.2E-158;9.2E-158;9.2E-158;9.2E-158;9.2E-158;1.3E-157;1.3E-157;1.9E-157;1.9E-157;1.9E-157	alpha/beta hydrolase [Streptococcus sanguinis]	5.6e-213	291	291	10	300	99.31
MGYP000953419522	alpha/beta hydrolase	275	3.4E-50;8.4E-47;2.3E-44;1.9E-28;7.8E-20	alpha/beta hydrolase [Oscillochloris sp. ZM17-4]	3.4e-50	279	269	9	274	55.76
MGYP000953569392	alpha/beta hydrolase	233	3.0E-58;3.1E-58;4.2E-58;4.3E-58;4.4E-58;5.9E-58;6.1E-58;6.1E-58;6.3E-58;8.4E-58;8.4E-58;8.4E-58;8.4E-58;8.7E-58;8.9E-58;1.2E-57;1.7E-57;1.7E-57;1.7E-57;1.7E-57	alpha/beta hydrolase [Xanthomonas campestris]	3e-58	238	223	5	227	63.23
MGYP000955488663	alpha/beta fold hydrolase	264	4.3E-56;5.6E-50;2.2E-47;8.9E-47;1.6E-46;5.8E-46;7.3E-46;9.8E-46;9.8E-46;1.4E-45;1.7E-45;5.2E-45;1.1E-44;2.0E-44;2.2E-44;2.3E-44;2.3E-44;4.3E-44;6.5E-44;8.5E-44	alpha/beta fold hydrolase [Candidatus Thermokryptus mobilis]	4.3e-56	264	243	17	257	64.2
MGYP000955562064	alpha/beta hydrolase	238	3.3E-77;1.9E-76;2.9E-76;5.4E-76;1.1E-75;2.1E-75;4.3E-75;5.9E-75;6.3E-75;6.4E-75;1.1E-74;1.3E-74;3.6E-74;3.7E-74;6.5E-74;9.5E-74;1.1E-73;1.9E-73;2.6E-73;4.1E-73	alpha/beta hydrolase [Bdellovibrio bacteriovorus]	3.3e-77	285	217	22	236	71.89
MGYP000956970738	caspase family protein	342	1.0E-222;1.9E-47;4.7E-47;2.9E-46;3.0E-46;5.5E-46;5.6E-46;7.6E-46;1.0E-45;1.4E-45;4.8E-45;6.5E-45;6.5E-45;8.8E-45;1.6E-44;2.2E-44;3.0E-44;3.0E-44;3.0E-44;3.0E-44	caspase family protein [Haliscomenobacter sp.]	1e-222	1145	342	1	342	97.95
MGYP000956981760	alpha/beta hydrolase	293	2.0E-76;2.7E-76;2.6E-75;1.8E-74;4.0E-73;7.3E-73;5.3E-72;5.7E-72;6.3E-72;1.4E-71;4.2E-71;7.2E-71;9.0E-71;1.1E-70;1.6E-70;1.6E-70;1.6E-70;1.6E-70;1.6E-70;1.8E-70	alpha/beta hydrolase [Dermatobacter hominis]	2e-76	301	281	8	288	63.35
MGYP000957078082	lipase family protein	312	1.3E-63;3.4E-62;6.0E-60;1.7E-59;1.7E-59;1.9E-55;3.9E-55;7.7E-55;1.1E-53;1.1E-53;3.9E-53;3.9E-53;2.2E-52;2.4E-52;3.2E-52;3.4E-52;4.8E-52;7.7E-52;1.3E-51;1.4E-51	lipase family protein [Sphingomonas sp. G-3-2-10]	1.3e-63	316	330	2	311	55.76
MGYP000957805758	MULTISPECIES: hypothetical protein	277	8.3E-175;4.8E-173;7.9E-173;7.9E-173;1.6E-172;2.3E-172;3.2E-172;4.6E-172;1.3E-171;3.8E-171;2.2E-170;2.4E-167;2.5E-158;7.1E-158;2.0E-47;4.9E-46;1.0E-45;1.6E-40;8.1E-39;2.1E-38	MULTISPECIES: hypothetical protein [unclassified Rhodococcus (in: high G+C Gram-positive bacteria)]	8.3e-175	311	277	1	277	94.95
MGYP000958490445	alpha/beta hydrolase	278	2.8E-121;3.7E-120;3.8E-120;1.6E-118;1.9E-118;3.0E-118;1.0E-117;1.2E-117;1.7E-117;4.9E-117;5.2E-117;5.4E-117;6.9E-117;4.0E-116;4.3E-116;5.6E-116;5.6E-116;6.7E-116;2.4E-115;3.1E-115	alpha/beta hydrolase [Albitalea sp.]	2.8e-121	267	266	1	266	78.95
MGYP000958646713	alpha/beta hydrolase	264	1.0E-137;1.4E-131;2.3E-130;1.2E-127;1.0E-119;1.3E-118;8.3E-114;1.2E-99;8.6E-97;6.1E-96;4.6E-83;8.6E-83;7.9E-79;3.1E-77;7.2E-76;4.5E-75;6.7E-74;5.2E-73;2.1E-72;9.1E-69	alpha/beta hydrolase [Microbulbifer donghaiensis]	1e-137	262	261	4	264	84.67
MGYP000958981044	AcvB/VirJ family lysyl-phosphatidylglycerol hydrolase	470	5.7E-175;4.8E-172;1.5E-159;2.7E-148;3.5E-146;4.2E-146;5.9E-145;3.9E-143;4.2E-137;2.6E-135;7.3E-135;9.2E-135;1.0E-134;3.9E-127;8.8E-126;6.9E-125;9.4E-125;2.0E-124;1.1E-123;2.3E-123	AcvB/VirJ family lysyl-phosphatidylglycerol hydrolase [Geopsychrobacter electrodiphilus]	5.7e-175	476	454	14	465	69.16
MGYP000959132955	alpha/beta hydrolase	183	4.1E-33;4.7E-21;6.4E-21;6.5E-21;7.1E-21;8.5E-21;2.0E-20;2.7E-20;2.7E-20;3.2E-20;3.8E-20;5.3E-20;7.7E-20;7.7E-20;8.6E-20;8.6E-20;8.7E-20;9.2E-20;9.2E-20;1.0E-19	alpha/beta hydrolase [Turneriella parva]	4.1e-33	200	166	2	165	60.84
MGYP000959693354	alpha/beta fold hydrolase	263	2.3E-63;7.8E-61;8.5E-57;4.4E-20;2.3E-19;9.9E-19;1.3E-18;1.3E-18;1.3E-18;3.1E-18;3.2E-18;3.5E-18;3.6E-18;3.9E-18;4.5E-18;4.5E-18;4.9E-18;4.9E-18;4.9E-18;5.2E-18	alpha/beta fold hydrolase [Labilithrix luteola]	2.3e-63	308	269	15	263	55.76
MGYP000960359099	lipase family protein	267	9.4E-59;1.2E-58;4.7E-58;3.4E-57;5.1E-55;5.3E-55;1.1E-54;2.3E-54;8.6E-54;2.1E-53;6.5E-53;7.1E-53;1.7E-52;1.7E-52;4.1E-52;4.1E-52;4.9E-52;5.4E-52;7.0E-52;7.8E-52	lipase family protein [Leucothrix mucor]	9.4e-59	300	235	14	245	62.13
MGYP000960411162	triacylglycerol lipase	262	3.7E-24;3.7E-24;1.8E-23;3.9E-23;1.3E-22;1.8E-22;4.8E-22;5.0E-22;6.8E-22;7.3E-22;9.7E-22;3.4E-21;5.2E-21;5.7E-21;7.0E-21;7.0E-21;7.9E-21;9.5E-21;1.0E-20;1.1E-20	triacylglycerol lipase [Bacillus sp. SLBN-46]	3.7e-24	234	203	47	239	55.67
MGYP000960601638	MULTISPECIES: alpha/beta hydrolase	256	5.7E-193;5.7E-193;2.3E-192;3.3E-192;4.7E-192;1.3E-191;1.9E-191;2.7E-191;3.8E-191;3.8E-191;5.5E-191;1.8E-189;1.8E-189;1.7E-176;1.3E-170;1.6E-166;1.9E-166;5.5E-166;1.1E-165;1.8E-164	MULTISPECIES: alpha/beta hydrolase [Leclercia]	5.7e-193	256	256	1	256	100
MGYP000960671358	triacylglycerol lipase	293	9.8E-212;8.0E-186;3.8E-184;2.2E-183;8.9E-183;2.6E-182;5.1E-182;1.5E-181;1.5E-181;1.5E-181;1.5E-181;1.5E-181;2.1E-181;2.1E-181;3.0E-181;4.2E-181;8.5E-181;1.2E-180;2.4E-180;2.4E-180	triacylglycerol lipase [uncultured Corynebacterium sp.]	9.8e-212	300	293	1	293	99.66
MGYP000961764126	Mbeg1-like protein	237	3.6E-34;1.1E-32;1.5E-32;2.1E-32;2.1E-32;2.1E-32;2.1E-32;2.9E-31;8.3E-31;8.3E-31;2.3E-30;3.0E-30;3.7E-29;3.8E-28;3.8E-28;3.8E-28;5.3E-28;6.7E-28;9.1E-28;1.0E-27	Mbeg1-like protein [Scytonema sp. UIC 10036]	3.6e-34	392	224	21	229	56.25
MGYP000962029225	lipase family protein	302	3.7E-88;9.9E-88;2.3E-82;5.6E-75;1.1E-74;1.5E-69;1.3E-66;7.7E-64;4.3E-60;2.2E-55;7.8E-55;8.0E-55;6.3E-49;5.0E-48;3.9E-47;4.5E-47;7.7E-47;1.2E-45;2.5E-45;1.5E-44	lipase family protein [Rhizobium fabae]	3.7e-88	306	299	4	297	66.22
MGYP000962075849	alpha/beta hydrolase	265	2.2E-93;3.8E-93;2.4E-92;2.0E-90;7.1E-90;4.1E-89;5.2E-89;6.5E-88;2.9E-87;4.4E-87;7.2E-87;2.7E-86;5.3E-86;8.0E-86;8.6E-86;1.7E-85;2.5E-85;6.9E-85;7.2E-85;9.9E-85	alpha/beta hydrolase [Ferruginibacter paludis]	2.2e-93	268	269	1	263	71.38
MGYP000962590431	alpha/beta fold hydrolase	267	5.1E-76;8.0E-73;4.5E-72;9.1E-72;1.3E-70;2.1E-70;2.3E-70;1.9E-69;2.4E-69;3.4E-69;2.1E-68;3.0E-68;1.1E-67;1.5E-65;7.4E-63;1.0E-62;4.5E-62;1.2E-61;1.7E-61;1.7E-61	alpha/beta fold hydrolase [Parachitinimonas caeni]	5.1e-76	261	261	1	261	62.07
MGYP000962606487	triacylglycerol lipase	219	2.4E-44;7.3E-43;2.5E-41;2.5E-41;6.7E-41;1.8E-40;3.6E-40;3.6E-40;7.0E-40;8.3E-40;1.6E-38;9.7E-38;4.0E-37;3.9E-28;2.2E-27;6.5E-27;2.5E-26;3.7E-25;5.2E-25;5.2E-25	triacylglycerol lipase [Nannocystis sp.]	2.4e-44	468	243	5	217	53.91
MGYP000964200802	alpha/beta fold hydrolase	203	7.4E-70;1.4E-47;5.2E-47;7.2E-47;7.3E-47;2.0E-46;2.1E-46;4.1E-46;1.7E-45;2.4E-45;6.6E-45;2.6E-44;3.6E-44;3.6E-44;5.0E-44;5.0E-44;5.6E-44;6.2E-44;6.2E-44;6.3E-44	alpha/beta fold hydrolase [Brevibacterium sp.]	7.4e-70	288	202	2	203	67.33
MGYP000964864308	alpha/beta hydrolase	241	1.8E-168;5.2E-168;2.1E-167;4.8E-164;2.1E-158;1.2E-157;2.8E-156;4.0E-156;1.5E-140;5.2E-140;7.3E-140;3.0E-139;4.9E-138;1.0E-137;3.6E-133;7.2E-133;1.0E-132;1.4E-130;3.2E-129;4.4E-127	alpha/beta hydrolase [Exiguobacterium sibiricum]	1.8e-168	241	241	1	241	100
MGYP000966792628	lipase family protein	272	1.1E-84;1.9E-73;1.4E-70;1.3E-68;2.0E-68;1.7E-67;9.5E-67;1.2E-66;5.6E-65;7.7E-64;7.9E-61;6.0E-60;3.5E-59;3.5E-59;4.0E-58;5.7E-58;5.7E-58;7.7E-58;8.0E-58;9.0E-58	lipase family protein [Pseudanabaena sp. PCC 6802]	1.1e-84	265	266	6	271	68.05
MGYP000967014251	alpha/beta fold hydrolase	309	1.6E-52;2.1E-47;4.3E-45;4.3E-45;1.1E-43;2.6E-43;3.4E-43;5.8E-43;8.4E-43;1.2E-42;1.5E-42;3.9E-42;5.0E-42;8.6E-42;1.1E-41;1.1E-41;1.1E-41;1.5E-41;2.2E-41;2.2E-41	alpha/beta fold hydrolase [Pinisolibacter sp.]	1.6e-52	309	257	53	306	56.81
MGYP000967142950	lipase family protein	204	9.4E-28;1.9E-27;2.7E-27;7.4E-27;2.1E-26;4.1E-26;4.3E-25;1.4E-24;1.7E-24;4.9E-24;8.3E-24;1.5E-21;2.2E-21;4.3E-21;8.4E-21;8.4E-21;1.7E-20;2.8E-20;3.2E-20;3.0E-19	lipase family protein [Caproiciproducens galactitolivorans]	9.4e-28	225	168	38	197	59.52
MGYP000967501707	alpha/beta hydrolase family protein	236	1.2E-128;1.2E-128;6.8E-128;3.2E-126;1.3E-67;2.5E-59;2.5E-59;3.6E-59;5.0E-59;1.4E-58;3.9E-55;2.0E-52;5.1E-52;8.0E-52;1.6E-51;1.6E-51;6.4E-51;9.1E-51;1.8E-50;1.8E-50	alpha/beta hydrolase family protein [Variovorax sp.]	1.2e-128	279	235	4	236	84.68
MGYP000967800092	alpha/beta hydrolase	270	1.8E-47;2.3E-47;6.0E-47;7.2E-47;4.7E-46;5.1E-46;5.2E-46;6.7E-46;6.7E-46;7.1E-46;7.4E-46;7.4E-46;1.0E-45;1.3E-45;1.3E-45;1.3E-45;2.1E-45;2.9E-45;3.7E-45;4.1E-45	alpha/beta hydrolase [Balneola vulgaris]	1.8e-47	263	258	9	260	59.69
MGYP000968433829	lipase family protein	231	1.5E-43;3.4E-42;1.1E-41;5.3E-41;9.3E-41;2.6E-40;1.6E-39;1.9E-39;1.4E-37;6.9E-37;1.0E-35;4.2E-33;6.5E-33;7.8E-33;1.0E-32;1.1E-32;1.6E-32;1.6E-32;2.5E-32;4.1E-32	lipase family protein [Bradyrhizobium sp. URHD0069]	1.5e-43	301	228	3	225	52.63
MGYP000970389307	alpha/beta fold hydrolase	260	7.2E-50;2.9E-49;3.4E-48;2.0E-47;8.7E-46;1.7E-45;2.0E-45;2.2E-45;2.5E-45;1.3E-44;1.9E-44;3.2E-44;3.2E-44;3.4E-44;3.7E-44;5.4E-44;1.1E-43;1.3E-43;1.5E-43;1.5E-43	alpha/beta fold hydrolase [Candidatus Nitrosotenuis chungbukensis]	7.2e-50	250	246	16	260	60.57
MGYP000972260955	lipase family protein	444	0.0E0;1.2E-314;2.8E-313;4.0E-313;6.6E-312;4.4E-310;1.8E-309;9.0E-294;2.6E-293;1.0E-292;6.0E-292;1.0E-290;1.7E-245;1.1E-243;7.3E-135;7.3E-135;2.9E-134;4.0E-134;1.2E-131;3.3E-131	lipase family protein [Selenomonas sputigena]	0	444	444	1	444	98.87
MGYP000972503754	alpha/beta fold hydrolase	170	4.2E-57;3.2E-33;1.9E-24;5.0E-24;7.8E-24;1.9E-23;5.1E-23;3.2E-22;6.5E-22;2.4E-21;4.4E-21;4.7E-21;5.0E-21;1.7E-20;4.2E-20;1.1E-19;1.4E-19;2.8E-19;7.0E-19;2.2E-18	alpha/beta fold hydrolase [Thermaurantimonas aggregans]	4.2e-57	433	165	7	170	72.73
MGYP000973373747	alpha/beta fold hydrolase	252	1.2E-24;2.5E-21;3.4E-21;6.6E-21;3.5E-20;3.5E-20;2.4E-19;2.5E-19;7.3E-19;1.7E-18;4.5E-18;4.8E-18;1.0E-17;1.9E-17;2.3E-17;2.7E-17;2.8E-17;8.2E-17;2.4E-16;7.0E-16	alpha/beta fold hydrolase [Micromonospora sp. HK10]	1.2e-24	271	203	53	245	55.17
MGYP000973470835	lipase family protein	243	5.5E-35;1.7E-34;2.5E-34;2.4E-33;4.0E-32;6.3E-32;1.6E-31;1.7E-31;1.7E-31;1.9E-31;1.9E-31;2.3E-31;2.9E-31;3.0E-31;3.1E-31;3.1E-31;1.0E-30;1.2E-30;4.4E-30;4.4E-30	lipase family protein [Hydrogenoanaerobacterium sp.]	5.5e-35	225	172	38	205	59.88
MGYP000974484020	lipase family protein	261	8.0E-47;6.9E-43;7.1E-43;9.8E-43;1.1E-42;1.4E-42;1.4E-42;2.4E-42;2.8E-42;2.8E-42;4.3E-42;4.3E-42;4.3E-42;4.3E-42;6.0E-42;7.2E-42;1.1E-41;1.2E-41;1.5E-41;1.7E-41	lipase family protein [Leucothrix arctica]	8e-47	290	255	2	251	57.65
MGYP000974570666	alpha/beta fold hydrolase	197	9.1E-22;1.3E-21;2.4E-20;1.3E-19;2.5E-19;3.5E-19;6.5E-19;6.7E-19;6.7E-19;6.9E-19;7.6E-19;9.1E-19;9.1E-19;9.1E-19;9.3E-19;1.0E-18;1.4E-18;1.4E-18;1.8E-18;1.8E-18	alpha/beta fold hydrolase [Duganella lactea]	9.1e-22	315	109	88	196	63.3
MGYP000976062504	alpha/beta fold hydrolase	193	1.6E-69;4.9E-67;8.1E-63;2.7E-60;7.7E-60;5.5E-59;6.7E-59;7.9E-59;1.8E-58;3.2E-58;4.5E-58;9.0E-58;2.4E-54;6.7E-54;5.9E-52;4.0E-51;9.0E-51;2.4E-50;4.1E-50;5.8E-50	alpha/beta fold hydrolase [Halioxenophilus sp. WMMB6]	1.6e-69	193	192	1	192	70.83
MGYP000976699681	hypothetical protein	232	1.1E-169;5.9E-123;1.2E-115;2.6E-66;2.8E-65;5.2E-64;3.1E-63;1.4E-61;3.9E-58;2.6E-57;2.1E-56;1.1E-54;3.0E-54;3.1E-54;3.1E-54;4.3E-54;4.4E-54;4.4E-54;6.0E-54;6.2E-54	hypothetical protein [Micropruina glycogenica]	1.1e-169	232	232	1	232	99.57
MGYP000977706598	alpha/beta hydrolase	197	1.2E-50;5.4E-48;1.5E-47;5.8E-47;2.5E-44;2.8E-44;2.0E-43;2.2E-43;4.3E-43;6.3E-43;7.8E-43;1.9E-42;2.1E-42;3.9E-42;8.2E-42;8.5E-42;1.1E-41;1.9E-41;1.9E-41;1.9E-41	alpha/beta hydrolase [Nitrolancea hollandica]	1.2e-50	251	195	5	197	63.59
MGYP000978049135	alpha/beta fold hydrolase	263	4.2E-116;1.5E-111;3.3E-110;1.1E-106;1.1E-104;1.4E-97;7.1E-87;1.0E-86;1.4E-86;2.0E-86;2.3E-86;4.0E-86;6.3E-81;2.2E-76;4.4E-76;4.4E-76;4.4E-76;4.4E-76;8.9E-76;1.3E-75	alpha/beta fold hydrolase [Bacteroides sp. 224]	4.2e-116	264	262	1	261	80.15
MGYP000978208154	alpha/beta fold hydrolase	231	7.0E-139;3.5E-108;9.9E-108;2.8E-107;4.0E-107;1.1E-106;1.2E-103;1.4E-101;1.6E-100;2.2E-100;6.4E-100;2.6E-99;8.9E-87;2.0E-84;2.0E-84;2.4E-84;4.3E-84;2.6E-82;5.6E-82;3.9E-81	alpha/beta fold hydrolase [Limimaricola sp.]	7e-139	384	230	1	230	94.35
MGYP000978752629	triacylglycerol lipase	236	2.5E-29;3.9E-28;3.9E-28;2.0E-26;7.7E-26;8.1E-26;2.0E-25;2.1E-25;1.8E-24;4.4E-24;6.2E-24;7.0E-24;8.3E-24;8.7E-24;8.7E-24;9.6E-24;3.4E-23;3.8E-23;6.1E-23;8.6E-23	triacylglycerol lipase [Neobacillus drentensis]	2.5e-29	234	185	31	214	56.76
MGYP000978996918	hypothetical protein MNEG_9475	322	2.3E-53;9.9E-52;8.6E-44;2.1E-43;2.5E-39;9.4E-39;1.2E-37;5.4E-36;8.5E-34;2.4E-32;4.4E-30;3.6E-29;1.2E-28;6.6E-28;2.2E-27;4.3E-27;2.5E-26;4.4E-25;1.3E-24;1.6E-24	hypothetical protein MNEG_9475 [Monoraphidium neglectum]	2.3e-53	349	310	23	320	54.84
MGYP000979012495	lipase family protein	280	3.5E-66;2.6E-60;7.5E-56;1.1E-51;1.2E-50;1.8E-49;2.0E-46;4.9E-46;7.0E-46;7.0E-46;3.1E-45;7.9E-45;1.9E-43;2.6E-43;5.2E-39;1.3E-37;3.9E-34;6.3E-28;3.5E-26;1.3E-24	lipase family protein [Caulobacter ginsengisoli]	3.5e-66	292	284	3	275	60.92
MGYP000979042909	alpha/beta hydrolase	630	6.8E-153;5.4E-151;6.3E-150;3.4E-147;9.4E-146;3.7E-144;3.0E-143;7.2E-142;7.4E-141;8.6E-141;1.9E-139;4.0E-139;1.7E-137;1.7E-136;3.3E-136;3.6E-136;5.9E-135;1.7E-134;8.4E-133;1.3E-128	alpha/beta hydrolase [Undibacterium sp. TS12]	6.8e-153	658	626	17	627	56.71
MGYP000979480163	hypothetical protein	261	1.4E-182;2.8E-182;1.1E-131;1.4E-129;2.9E-129;5.8E-129;1.2E-128;1.2E-128;1.7E-128;2.4E-128;3.4E-128;3.4E-128;4.8E-128;1.4E-127;1.9E-127;1.9E-127;5.4E-127;7.9E-127;3.2E-126;4.5E-126	hypothetical protein [Sphingobacterium sp.]	1.4e-182	261	261	1	261	97.7
MGYP000979492736	alpha/beta fold hydrolase	263	2.3E-167;1.2E-150;2.5E-150;1.4E-146;2.0E-138;1.1E-87;1.2E-86;1.5E-86;2.5E-85;9.6E-84;1.5E-80;5.0E-78;4.6E-77;3.1E-76;3.8E-76;1.3E-74;7.5E-74;1.1E-73;1.6E-73;7.0E-72	alpha/beta fold hydrolase [Ciceribacter selenitireducens]	2.3e-167	257	257	1	257	94.94
MGYP000980159231	alpha/beta fold hydrolase	297	1.7E-41;4.6E-41;1.8E-40;3.5E-39;5.8E-39;1.6E-37;2.5E-36;8.0E-34;9.6E-34;9.9E-33;1.2E-32;1.2E-32;1.2E-32;1.3E-32;1.4E-32;1.4E-32;1.4E-32;1.4E-32;1.4E-32;1.4E-32	alpha/beta fold hydrolase [Desulfatibacillum aliphaticivorans]	1.7e-41	297	303	3	292	55.12
MGYP000980183189	hypothetical protein	276	3.3E-179;5.1E-142;5.1E-142;7.0E-102;1.4E-100;5.5E-100;5.8E-100;7.9E-100;1.0E-98;3.7E-98;1.5E-97;2.1E-97;2.1E-97;2.9E-97;2.9E-97;4.1E-97;5.7E-97;5.7E-97;5.7E-97;5.8E-97	hypothetical protein [Caproiciproducens faecalis]	3.3e-179	275	274	3	276	92.7
MGYP000980880708	hypothetical protein	182	1.2E-51;5.1E-42	hypothetical protein [Neobittarella massiliensis]	1.2e-51	227	182	3	182	62.64
MGYP000980978529	alpha/beta fold hydrolase	327	2.3E-55;7.6E-53;1.4E-52;3.0E-52;3.3E-51;3.0E-50;3.9E-50;2.1E-49;5.6E-49;1.8E-48;3.2E-48;6.6E-48;1.7E-47;1.8E-47;2.6E-47;3.0E-47;4.9E-47;7.2E-47;1.4E-46;1.5E-46	alpha/beta fold hydrolase [Hanstruepera ponticola]	2.3e-55	300	278	54	327	56.47
MGYP000981668588	hypothetical protein	185	2.5E-19;3.0E-19	hypothetical protein [Neobittarella massiliensis]	2.5e-19	188	161	33	182	50.31
MGYP000981945455	lysophospholipase	284	7.5E-38;1.0E-30;3.4E-30;3.9E-21	lysophospholipase [Rubinisphaera margarita]	7.5e-38	280	241	15	252	54.36
MGYP000981954120	alpha/beta hydrolase	257	1.4E-84;6.6E-78;6.6E-75;7.3E-75;1.3E-74;1.3E-74;2.2E-74;3.9E-74;5.3E-74;2.4E-73;3.4E-73;3.4E-73;1.9E-72;1.9E-72;2.3E-72;2.6E-72;3.8E-72;3.8E-72;4.2E-72;5.3E-72	alpha/beta hydrolase [Lachnotalea sp. AF33-28]	1.4e-84	255	253	1	253	69.57
MGYP000982075113	alpha/beta hydrolase	246	3.0E-140;1.4E-138;5.7E-138;8.1E-138;2.3E-137;3.3E-137;1.9E-136;7.7E-136;2.3E-53;3.2E-53;7.5E-53;7.5E-53;7.5E-53;5.1E-52;4.1E-51;9.6E-51;1.6E-34;1.1E-32;6.3E-32;1.2E-31	alpha/beta hydrolase [Actinomyces timonensis]	3e-140	207	201	1	201	99
MGYP000982491046	alpha/beta fold hydrolase	342	3.0E-22;3.0E-22;1.8E-19;2.6E-19;2.6E-19;2.5E-16;6.7E-16	alpha/beta fold hydrolase [Rhabdothermincola sediminis]	3e-22	251	197	63	247	54.31
MGYP000982491064	triacylglycerol lipase	303	4.4E-20;1.6E-18;3.5E-18;5.5E-18;6.7E-18;7.1E-18;7.1E-18;1.3E-17;2.4E-17;2.7E-17;3.5E-17;4.6E-17;4.6E-17;6.1E-17;6.4E-17;6.6E-17;6.6E-17;7.1E-17;7.6E-17;1.2E-16	triacylglycerol lipase [Isoalcanivorax pacificus]	4.4e-20	294	199	83	273	54.27
MGYP000982515930	phospholipase A1-IIdelta	270	3.5E-194;2.5E-186;4.0E-184;1.0E-152;1.5E-149;1.0E-148;1.2E-148;2.1E-147;1.6E-145;5.1E-144;5.2E-139;1.6E-137;2.2E-137;1.9E-136;2.3E-136;1.2E-134;2.7E-134;7.4E-134;8.6E-134;1.6E-133	phospholipase A1-IIdelta [Quercus lobata]	3.5e-194	493	270	1	270	100
MGYP000983149857	lipase family protein	213	2.1E-46;8.7E-46;7.1E-45;8.1E-45;5.2E-44;1.6E-42;5.6E-42;3.1E-40;1.4E-37;1.7E-36;1.6E-35;6.3E-35;1.1E-34;2.2E-33;2.8E-33;6.5E-33;6.6E-33;6.7E-33;1.1E-32;2.2E-32	lipase family protein [Tetrahymena thermophila SB210]	2.1e-46	283	183	1	181	64.48
MGYP000983689643	lipase family protein	266	5.5E-27;8.6E-25;1.8E-24;3.2E-24;6.7E-24;8.5E-24;1.1E-23;1.3E-23;4.3E-23;4.9E-23;7.0E-23;1.0E-22;1.0E-22;1.1E-22;1.1E-22;1.9E-22;2.0E-22;4.8E-22;5.1E-22;5.2E-22	lipase family protein [Feifania hominis]	5.5e-27	226	183	73	253	60.11
MGYP000984435870	alpha/beta fold hydrolase	240	2.6E-150;4.2E-134;1.6E-132;1.9E-128;2.9E-128;1.5E-119;1.1E-116;1.0E-70;1.2E-67;3.7E-64;3.7E-64;2.1E-63;1.3E-62;1.3E-62;5.1E-62;7.7E-61;8.1E-54;4.0E-53;9.4E-53;2.9E-50	alpha/beta fold hydrolase [Nitratidesulfovibrio sp. SRB-5]	2.6e-150	371	217	1	217	98.62
MGYP000984476258	alpha/beta fold hydrolase	289	5.8E-25;8.2E-24;9.5E-24;1.9E-23;4.4E-23;7.0E-23;1.4E-22;3.1E-22;5.3E-22;5.4E-22;7.4E-22;7.4E-22;8.2E-22;8.2E-22;8.2E-22;8.2E-22;8.2E-22;8.2E-22;8.2E-22;8.2E-22	alpha/beta fold hydrolase [Accumulibacter sp.]	5.8e-25	307	229	63	289	53.28
MGYP000984479992	alpha/beta fold hydrolase	291	7.8E-94;9.3E-94;1.1E-93;3.2E-91;3.2E-91;1.8E-90;2.0E-90;9.0E-89;9.1E-89;3.6E-88;1.0E-87;1.5E-87;2.4E-87;3.8E-87;6.9E-87;1.5E-86;1.9E-86;4.8E-86;8.9E-86;1.1E-85	alpha/beta fold hydrolase [Dechloromonas sp. CZR5]	7.8e-94	302	284	5	288	69.37
MGYP000984489459	triacylglycerol lipase	218	6.9E-119;4.0E-118;3.3E-117;8.8E-115;6.8E-107;5.2E-104;8.6E-103;1.3E-97;1.5E-80;7.9E-73;1.1E-72;3.2E-72;9.4E-72;2.3E-71;7.3E-71;1.5E-70;1.5E-70;1.7E-70;2.1E-70;2.1E-70	triacylglycerol lipase [Fluviicoccus sp.]	6.9e-119	312	218	1	218	88.53
MGYP000984513048	Mbeg1-like protein	325	9.5E-39;2.5E-38;5.5E-35;8.2E-32;1.4E-31;3.8E-27;4.8E-20;2.5E-19;2.1E-17;3.2E-16;4.1E-16;4.4E-16;5.4E-16	Mbeg1-like protein [Chromobacterium sp. LK11]	9.5e-39	582	226	4	224	58.41
MGYP000985297359	lipase family protein	170	6.4E-117;1.4E-110;1.3E-94;2.2E-93;2.9E-93;2.9E-93;2.9E-93;2.9E-93;3.0E-90;8.4E-75;8.4E-75;8.4E-75;3.4E-74;4.8E-74;6.7E-74;1.3E-73;3.8E-73;3.1E-72;4.7E-60;4.7E-60	lipase family protein [Vibrio penaeicida]	6.4e-117	380	170	1	170	99.41
MGYP000985326555	alpha/beta hydrolase	245	2.0E-103;2.0E-103;2.7E-103;1.8E-102;5.0E-101;9.6E-101;2.4E-100;4.9E-100;9.4E-100;1.2E-99;1.4E-99;4.5E-99;4.5E-99;5.6E-99;1.7E-98;2.6E-98;3.2E-98;5.3E-98;6.1E-98;7.7E-98	alpha/beta hydrolase [Nitrosomonas sp.]	2e-103	248	243	5	243	77.78
MGYP000986081066	alpha/beta fold hydrolase	275	2.8E-143;4.5E-100;7.1E-98;1.1E-27;2.2E-20;3.4E-20;1.8E-19;3.6E-19;7.3E-19;1.0E-18;1.7E-18;7.6E-18;1.0E-17;2.1E-17;2.2E-17;2.8E-17;3.5E-17;3.7E-17;6.9E-17;7.4E-17	alpha/beta fold hydrolase [Aquihabitans sp. G128]	2.8e-143	284	268	6	273	81.72
MGYP000986477255	alpha/beta fold hydrolase	275	1.5E-96;1.5E-95;1.7E-95;2.2E-95;3.4E-95;6.2E-95;6.6E-95;9.0E-95;1.4E-94;2.8E-94;2.8E-94;5.0E-94;7.1E-94;7.6E-94;1.1E-93;1.1E-93;1.1E-93;1.5E-93;1.6E-93;3.2E-93	alpha/beta fold hydrolase [Polaribacter sp. Q13]	1.5e-96	257	218	58	275	80.28
MGYP000986552338	alpha/beta hydrolase	318	2.1E-128;1.8E-127;3.6E-127;4.9E-127;9.8E-127;6.2E-126;1.7E-125;1.7E-125;7.2E-125;2.5E-124;1.6E-123;9.3E-123;3.4E-122;1.5E-121;3.9E-121;3.2E-120;4.9E-120;1.3E-119;2.1E-118;9.9E-117	alpha/beta hydrolase [Flavobacterium phragmitis]	2.1e-128	315	313	1	313	76.68
MGYP000988091951	uncharacterized protein GSPATT00018317001	176	2.4E-25;6.6E-24;3.8E-23;2.0E-22;3.5E-22;6.4E-22;6.8E-22;2.1E-21;1.4E-20;4.3E-20;6.6E-20;3.3E-18;1.9E-17;3.7E-17;4.0E-17;7.0E-17;8.2E-17;8.6E-17;1.1E-16;1.5E-16	uncharacterized protein GSPATT00018317001 [Paramecium tetraurelia]	2.4e-25	285	165	3	164	57.58
MGYP000988202376	alpha/beta hydrolase	234	1.9E-58;2.8E-56;3.1E-55;4.1E-55;4.2E-55;8.8E-55;1.2E-54;6.7E-54;7.7E-53;1.4E-52;1.5E-46;1.5E-46;7.0E-46;8.3E-46;3.7E-44;1.7E-42;2.1E-42;8.2E-29;3.6E-26;5.1E-26	alpha/beta hydrolase [Clostridium rhizosphaerae]	1.9e-58	245	239	4	229	60.67
MGYP000988651924	uncharacterized protein SAPINGB_P003786	390	1.6E-56;8.0E-31;3.2E-29;4.2E-29;1.1E-28;1.5E-28;4.4E-28;6.5E-28;6.6E-28;1.1E-27;2.2E-27;2.2E-27;2.7E-27;5.1E-27;5.7E-27;5.8E-27;7.2E-27;7.4E-27;1.4E-26;1.4E-26	uncharacterized protein SAPINGB_P003786 [Saprochaete ingens]	1.6e-56	532	351	33	374	53.56
MGYP000988793916	alpha/beta hydrolase	265	1.5E-62;6.0E-62;9.2E-62;1.2E-61;2.6E-61;1.5E-60;1.5E-60;5.9E-60;2.6E-59;1.4E-58;2.4E-58;3.6E-58;1.5E-57;4.2E-57;5.9E-57;6.3E-57;6.8E-57;8.2E-57;8.9E-57;1.2E-56	alpha/beta hydrolase [Ohtaekwangia sp.]	1.5e-62	253	250	13	262	58.8
MGYP000988794546	alpha/beta hydrolase	268	1.2E-93;1.9E-45;7.7E-44;8.1E-44;1.3E-43;4.4E-43;1.0E-42;3.8E-42;4.5E-42;4.6E-42;5.3E-42;5.5E-42;7.5E-42;8.5E-41;6.1E-40;6.1E-40;5.3E-39;5.6E-38;7.5E-38;8.0E-38	alpha/beta hydrolase [Labilithrix luteola]	1.2e-93	257	252	1	252	73.81
MGYP000989379086	alpha/beta hydrolase	284	2.1E-124;7.5E-109;1.0E-105;4.1E-105;1.0E-104;1.7E-104;3.9E-101;1.5E-33;4.1E-33;5.8E-33;1.9E-32;2.3E-32;3.3E-32;7.8E-32;2.8E-31;1.5E-30;3.3E-30;5.6E-30;8.2E-30;8.3E-30	alpha/beta hydrolase [Desulfosudis oleivorans]	2.1e-124	285	277	4	279	75.45
MGYP000989893135	hypothetical protein	248	3.3e-51	hypothetical protein [Anaeroplasma bactoclasticum]	3.3e-51	253	248	3	244	60.08
MGYP000990008233	lipase family protein	196	4.2E-39;1.8E-38;1.6E-37;2.3E-36;2.5E-36;7.9E-36;9.9E-36;1.2E-35;1.2E-35;1.2E-35;1.4E-35;2.2E-35;2.5E-35;8.2E-35;8.6E-35;8.6E-35;9.0E-35;9.1E-35;9.4E-35;9.7E-35	lipase family protein [Stieleria tagensis]	4.2e-39	303	138	64	195	69.57
MGYP000990424600	alpha/beta hydrolase	284	1.4E-74;2.5E-74;3.6E-74;5.7E-74;1.9E-73;2.9E-73;4.1E-73;8.1E-73;8.1E-73;1.6E-72;1.6E-72;2.3E-72;3.2E-72;3.3E-72;3.7E-72;4.6E-72;4.6E-72;4.6E-72;4.6E-72;5.4E-72	alpha/beta hydrolase [Archangium sp.]	1.4e-74	281	266	17	281	63.53
MGYP000990837337	alpha/beta fold hydrolase	301	2.6E-49;2.6E-49;4.4E-49;3.9E-48;6.9E-48;3.4E-47;3.8E-47;4.3E-47;5.6E-47;8.7E-47;2.1E-46;6.4E-46;6.6E-46;8.5E-46;9.2E-46;1.1E-45;1.7E-45;1.9E-45;5.5E-45;8.7E-45	alpha/beta fold hydrolase [Pseudonocardia halophobica]	2.6e-49	324	269	31	283	54.28
MGYP000990951454	alpha/beta fold hydrolase	257	5.9E-182;1.3E-94;9.6E-92;5.9E-91;2.7E-89;1.2E-88;1.5E-88;1.7E-88;1.7E-88;1.7E-88;2.0E-88;2.7E-88;6.3E-88;2.4E-87;2.8E-87;2.8E-87;6.6E-87;1.0E-86;1.3E-86;1.4E-86	alpha/beta fold hydrolase [Citricoccus sp.]	5.9e-182	257	257	1	257	100
MGYP000992319495	alpha/beta hydrolase	263	5.3E-63;6.8E-55;1.4E-54;5.1E-36;2.8E-33;4.3E-33;6.6E-33;8.5E-33;9.0E-33;1.6E-32;2.3E-32;8.5E-32;1.5E-31;2.8E-31;3.5E-31;3.5E-31;3.5E-31;4.2E-31;4.3E-31;5.3E-31	alpha/beta hydrolase [Plasticicumulans acidivorans]	5.3e-63	267	263	2	263	57.79
MGYP000993050182	alpha/beta hydrolase	246	9.2E-91;3.1E-89;6.6E-89;3.5E-86;4.6E-86;8.9E-86;1.5E-84;1.3E-83;2.7E-83;7.0E-83;1.6E-81;2.3E-78;3.9E-78;6.9E-78;9.2E-78;9.8E-78;1.1E-77;5.4E-77;2.8E-76;2.9E-76	alpha/beta hydrolase [Niastella caeni]	9.2e-91	229	228	14	241	77.19
MGYP000993110559	lipase	284	4.4E-95;1.4E-94;2.9E-94;4.1E-94;4.1E-94;4.1E-94;5.7E-94;5.7E-94;8.1E-94;8.1E-94;1.1E-93;1.1E-93;1.6E-93;2.3E-93;2.3E-93;2.3E-93;2.3E-93;3.2E-93;3.3E-93;3.3E-93	lipase [Longimonas halophila]	4.4e-95	286	285	1	283	68.42
MGYP000995029679	alpha/beta fold hydrolase	295	1.6E-207;1.8E-207;5.5E-85;4.1E-83;8.2E-72;1.8E-71;6.6E-71;1.1E-69;2.0E-67;3.1E-66;6.2E-66;3.1E-65;6.1E-65;1.2E-64;2.0E-64;2.9E-64;1.1E-62;2.8E-62;4.0E-62;1.1E-61	alpha/beta fold hydrolase [Levilinea saccharolytica]	1.6e-207	295	295	1	295	98.31
MGYP000995111789	alpha/beta fold hydrolase	269	4.4E-48;9.0E-48;6.0E-46;1.2E-45;2.1E-45;4.9E-45;9.3E-45;9.6E-45;3.1E-44;5.5E-44;7.8E-44;1.1E-43;2.1E-43;2.9E-43;4.2E-43;8.4E-43;1.2E-42;1.2E-42;2.3E-42;2.4E-42	alpha/beta fold hydrolase [Filimonas zeae]	4.4e-48	227	216	44	258	60.65
MGYP000995784372	alpha/beta fold hydrolase	302	4.9E-116;7.0E-116;7.0E-116;7.0E-116;7.0E-116;1.0E-115;1.0E-115;1.4E-115;2.0E-115;2.8E-115;4.0E-115;1.6E-114;3.3E-114;9.4E-114;1.3E-113;1.9E-113;2.7E-113;2.7E-113;5.4E-113;7.6E-113	alpha/beta fold hydrolase [Leptospira barantonii]	4.9e-116	307	305	2	302	72.13
MGYP000996621950	lipase family protein [	305	1.5E-33;1.8E-30;8.8E-28;2.9E-27;5.6E-27;1.4E-26;1.5E-26;2.7E-26;2.8E-26;5.2E-26;2.1E-25;3.2E-25;1.6E-24;2.0E-24;4.0E-24;5.3E-24;1.1E-23;1.2E-23;1.3E-23;1.6E-23	lipase family protein [[Leptolyngbya] sp. PCC 7376]	1.5e-33	274	185	79	260	60.54
MGYP000997044721	alpha/beta fold hydrolase	257	2.7E-79;4.0E-76;4.9E-75;9.8E-75;1.0E-74;2.0E-74;5.6E-74;8.2E-74;4.8E-70;2.4E-67;1.1E-65;2.2E-65;3.1E-65;3.1E-65;1.4E-54;9.2E-53;1.2E-32;2.6E-31;3.6E-31;1.4E-30	alpha/beta fold hydrolase [Anaeroplasma sp.]	2.7e-79	320	257	1	255	64.98
MGYP000997332816	alpha/beta hydrolase	243	2.9E-112;9.6E-96;1.7E-88;1.1E-77;3.0E-77;4.0E-77;6.0E-77;8.5E-77;1.2E-76;1.6E-76;3.3E-76;3.4E-76;4.4E-76;3.1E-75;7.9E-75;1.1E-74;1.9E-74;1.9E-74;2.6E-73;2.6E-73	alpha/beta hydrolase [Rhodobacter sp. SGA-6-6]	2.9e-112	269	229	15	243	82.1
MGYP000998011590	alpha/beta hydrolase	267	2.7E-183;1.0E-94;3.5E-89;5.7E-87;5.6E-86;2.3E-85;9.2E-85;1.1E-83;9.1E-83;4.7E-82;1.7E-80;1.8E-80;1.9E-80;4.6E-80;7.9E-80;2.6E-79;6.0E-79;1.3E-78;3.0E-78;6.1E-78	alpha/beta hydrolase [Ottowia sp.]	2.7e-183	267	267	1	267	100
MGYP000999422168	alpha/beta fold hydrolase	274	1.6E-119;2.0E-83;9.8E-77;3.4E-75;9.7E-75;1.7E-74;2.1E-74;1.1E-69;2.5E-68;1.5E-65;3.2E-61;6.4E-61;1.7E-59;2.3E-59;4.5E-59;1.3E-58;3.3E-58;3.5E-58;3.7E-58;3.7E-58	alpha/beta fold hydrolase [Leucobacter sp. UT-8R-CII-1-4]	1.6e-119	267	273	1	272	78.02
MGYP000999921223	alpha/beta fold hydrolase	316	2.2E-128;3.7E-121;5.4E-119;3.0E-116;6.7E-115;1.6E-110;1.3E-109;5.9E-108;1.5E-107;6.5E-105;2.3E-104;3.1E-103;5.1E-103;2.1E-102;7.8E-102;9.9E-102;2.2E-101;8.4E-101;3.2E-100;3.2E-100	alpha/beta fold hydrolase [Chthoniobacter flavus]	2.2e-128	319	318	1	315	73.58
MGYP001001496325	alpha/beta hydrolase	298	1.7E-84;4.9E-77;1.6E-76;3.9E-71;1.3E-70;4.8E-70;1.1E-69;1.5E-69;1.6E-69;4.5E-69;8.3E-69;1.5E-68;1.7E-68;3.6E-68;3.6E-68;6.8E-68;1.1E-67;2.1E-67;2.8E-67;1.1E-66	alpha/beta hydrolase [Chryseolinea sp. H1M3-3]	1.7e-84	313	286	8	293	63.64
MGYP001001703333	alpha/beta hydrolase	249	1.0E-45;2.2E-45;1.7E-44;3.9E-44;7.5E-43;4.3E-42;4.3E-42;3.2E-41;4.6E-41;4.6E-41;6.4E-41;1.2E-40;6.4E-40;1.1E-39;2.3E-39;3.9E-39;4.7E-39;5.9E-39;1.2E-38;2.2E-38	alpha/beta hydrolase [Nonomuraea sp. MG754425]	1e-45	246	221	18	238	60.18
MGYP001002086833	alpha/beta fold hydrolase	298	3.4E-206;2.7E-203;2.7E-203;3.8E-203;5.5E-203;5.5E-203;7.7E-203;7.7E-203;1.1E-202;1.1E-202;1.6E-202;2.2E-202;2.2E-202;3.2E-202;3.2E-202;3.2E-202;4.5E-202;4.5E-202;4.5E-202;6.4E-202	alpha/beta fold hydrolase [Aeromonas hydrophila]	3.4e-206	298	298	1	298	100
MGYP001002929471	alpha/beta fold hydrolase	197	9.9E-64;1.8E-62;2.1E-62;2.4E-62;2.5E-62;5.6E-62;1.1E-61;1.6E-61;4.3E-61;5.2E-61;6.7E-61;1.4E-60;5.4E-60;8.0E-60;8.2E-60;1.0E-59;1.1E-59;1.4E-59;1.6E-59;1.6E-59	alpha/beta fold hydrolase [Pyxidicoccus fallax]	9.9e-64	267	199	1	197	70.85
MGYP001003547580	alpha/beta hydrolase	240	3.4E-66;1.8E-65;2.2E-65;2.6E-65;3.9E-65;4.3E-65;8.7E-65;8.7E-65;3.8E-64;7.5E-64;1.4E-63;2.8E-62;4.9E-61;5.9E-61;5.9E-61;8.4E-61;4.9E-60;6.7E-60;7.4E-60;5.9E-59	alpha/beta hydrolase [Nocardia vaccinii]	3.4e-66	292	227	17	240	65.2
MGYP001004215081	alpha/beta fold hydrolase	123	8.6E-30;8.9E-30;1.6E-29;6.2E-29;1.0E-28;1.4E-28;1.9E-28;2.0E-28;3.4E-27;3.4E-27;5.0E-27;6.4E-27;1.3E-26;2.0E-26;2.5E-26;4.7E-26;4.9E-26;5.3E-26;7.8E-26;1.4E-25	alpha/beta fold hydrolase [Cystobacter ferrugineus]	8.6e-30	230	121	3	123	63.64
MGYP001004259079	alpha/beta hydrolase	326	7.7E-53;3.2E-50;6.6E-50	alpha/beta hydrolase [Sandaracinus amylolyticus]	7.7e-53	276	279	46	323	53.41
MGYP001004538911	alpha/beta hydrolase	256	8.1E-122;4.2E-83;5.9E-83;1.7E-82;7.5E-82;2.8E-79;1.7E-71;1.1E-70;5.5E-66;4.4E-65;1.3E-64;4.8E-62;1.4E-61;3.1E-60;2.5E-59;2.2E-57;4.2E-57;1.8E-55;2.7E-55;7.6E-55	alpha/beta hydrolase [Longilinea arvoryzae]	8.1e-122	256	256	1	256	82.81
MGYP001005032604	alpha/beta fold hydrolase	243	3.9E-82;1.6E-58;6.1E-34;6.4E-34;6.4E-34;6.7E-34;3.5E-33;4.9E-33;6.8E-33;3.3E-32;8.4E-32;1.2E-31;1.8E-31;3.0E-31;3.0E-31;3.0E-31;3.4E-31;1.3E-30;1.5E-30;2.8E-30	alpha/beta fold hydrolase [Thermaurantimonas aggregans]	3.9e-82	433	241	4	243	69.29
MGYP001005697760	alpha/beta hydrolase	216	7.2E-87;9.0E-87;9.5E-85;6.5E-82;1.2E-81;5.8E-81;9.4E-81;6.1E-80;1.1E-79;1.4E-79;3.8E-79;3.8E-79;4.2E-79;6.4E-79;9.6E-79;5.3E-76;3.3E-75;2.7E-74;4.2E-70;1.9E-69	alpha/beta hydrolase [Thiothrix litoralis]	7.2e-87	324	221	1	215	73.76
MGYP001005980253	alpha/beta hydrolase	267	1.5E-124;2.2E-124;6.3E-124;7.7E-124;1.5E-123;1.8E-123;1.8E-123;2.1E-123;2.2E-123;2.9E-123;3.0E-123;4.3E-123;6.3E-123;9.0E-123;1.8E-122;2.1E-122;2.1E-122;2.6E-122;2.9E-122;4.2E-122	alpha/beta hydrolase [Rhizobium leguminosarum]	1.5e-124	265	256	3	258	81.25
MGYP001006677736	lipase family protein	322	2.2E-25;3.2E-25;1.6E-24;2.2E-24;8.6E-24;8.6E-24;1.1E-23;3.2E-23;2.2E-22;2.4E-22;6.1E-22;6.1E-22;8.4E-22;8.4E-22;8.4E-22;1.1E-21;1.2E-21;1.4E-21;1.9E-21;3.1E-21	lipase family protein [uncultured Psychrosphaera sp.]	2.2e-25	288	190	82	257	50.53
MGYP001007005603	alpha/beta hydrolase	295	2.6E-72;1.8E-71;2.2E-70;5.5E-57;4.4E-56;5.2E-52;1.1E-51;2.2E-51;6.1E-51;8.6E-51;1.7E-50;2.4E-50;4.8E-50;6.6E-50;9.3E-50;9.6E-50;9.6E-50;9.6E-50;1.3E-49;1.9E-49	alpha/beta hydrolase [Desulfosporosinus sp. SRJS8]	2.6e-72	291	271	23	293	64.58
MGYP001007251130	alpha/beta hydrolase	278	2.8E-74;1.3E-72;5.7E-70;1.2E-69;4.6E-69;1.9E-68;1.1E-62;5.1E-62;7.6E-61;1.6E-59;4.6E-59;5.7E-59;3.3E-58;3.6E-57;2.0E-56;3.0E-56;5.9E-56;2.4E-55;3.1E-55;6.3E-55	alpha/beta hydrolase [Thermoflexus sp.]	2.8e-74	287	273	7	278	60.07
MGYP001007260244	lipase family protein	276	2.9E-56;4.1E-55;8.8E-55;1.9E-54;4.2E-54;1.5E-53;5.7E-53;8.3E-53;8.3E-53;1.6E-52;3.0E-52;5.1E-52;6.6E-52;9.0E-52;9.2E-52;9.3E-52;9.3E-52;1.3E-51;2.5E-51;3.3E-51	lipase family protein [Streptomyces sp. ME18-1-4]	2.9e-56	273	271	7	272	58.3
MGYP001007916723	alpha/beta hydrolase	292	1.1E-88;8.6E-50;3.8E-49;3.1E-48;1.9E-46;3.1E-46;3.1E-46;3.9E-46;5.5E-46;4.3E-45;1.3E-44;5.4E-44;3.1E-43;2.1E-41;3.6E-41;8.2E-40;8.2E-40;4.6E-39;3.1E-37;3.8E-36	alpha/beta hydrolase [Ramlibacter aurantiacus]	1.1e-88	290	279	12	287	67.03
MGYP001008078043	AcvB/VirJ family lysyl-phosphatidylglycerol hydrolase	223	6.7E-137;1.8E-134;4.4E-128;7.3E-125;1.2E-123;6.9E-123;5.7E-122;1.2E-121;1.2E-121;1.6E-119;2.9E-110;5.5E-106;1.3E-102;4.2E-102;1.7E-101;1.1E-94;1.6E-85;2.1E-85;9.3E-85;4.8E-84	AcvB/VirJ family lysyl-phosphatidylglycerol hydrolase [Kaistella gelatinilytica]	6.7e-137	223	223	1	223	91.03
MGYP001008620553	alpha/beta fold hydrolase	246	2.3E-73;1.2E-59;1.2E-54;1.1E-49;3.9E-44;2.4E-42;4.4E-41;4.2E-40	alpha/beta fold hydrolase [Pontiella desulfatans]	2.3e-73	246	245	1	243	65.71
MGYP001008672805	lipase	305	5.8E-162;1.1E-159;1.1E-157;4.3E-157;1.2E-156;1.7E-156;7.1E-156;7.1E-156;1.0E-155;1.4E-155;1.4E-155;2.9E-155;2.9E-155;4.1E-155;4.1E-155;4.1E-155;5.8E-155;5.8E-155;5.8E-155;5.8E-155	lipase [Leptospira ognonensis]	5.8e-162	303	283	21	303	86.22
MGYP001008938913	MULTISPECIES: alpha/beta hydrolase fold domain-containing protein	269	2.3E-69;3.1E-63;1.1E-62;3.5E-61;2.6E-60;4.7E-60;7.7E-60;1.1E-59;2.9E-59;8.1E-59;1.9E-58;1.4E-57;1.7E-57;1.9E-57;2.0E-57;8.0E-57;1.1E-56;1.6E-56;1.7E-56;6.4E-56	MULTISPECIES: alpha/beta hydrolase fold domain-containing protein [Actinomycetes]	2.3e-69	281	253	19	268	64.03
MGYP001009168493	alpha/beta hydrolase	245	7.5E-73;1.5E-72;4.9E-69;6.9E-69;1.3E-68;4.6E-65;9.2E-65;1.2E-64;3.6E-64;8.1E-64;6.6E-62;6.8E-62;1.9E-61;5.5E-61;5.7E-61;1.1E-60;9.4E-59;2.0E-58;2.2E-57;4.9E-57	alpha/beta hydrolase [Clostridium fungisolvens]	7.5e-73	241	242	1	242	67.77
MGYP001010780342	alpha/beta fold hydrolase	237	8.9E-144;8.4E-133;1.7E-132;6.0E-126;6.4E-126;2.0E-124;1.3E-96;2.7E-96;3.3E-86;6.5E-84;6.9E-84;4.2E-83;4.7E-83;5.3E-83;1.1E-82;1.2E-82;5.1E-82;5.9E-82;5.9E-82;7.4E-82	alpha/beta fold hydrolase [Amylibacter sp. IMCC11727]	8.9e-144	226	225	13	237	95.56
MGYP001010798391	alpha/beta hydrolase	269	3.0E-158;1.9E-107;3.0E-105;8.7E-105;1.7E-104;3.9E-104;5.0E-104;5.0E-104;7.0E-104;7.0E-104;7.0E-104;7.0E-104;7.0E-104;7.0E-104;7.9E-104;1.0E-103;1.4E-103;2.0E-103;2.0E-103;2.0E-103	alpha/beta hydrolase [Pseudorhodoplanes sinuspersici]	3e-158	268	268	1	268	88.06
MGYP001011277941	lipase family protein	207	2.4E-25;2.5E-25;4.7E-25;4.7E-25;5.3E-25;9.8E-25;1.9E-24;2.6E-24;2.7E-24;3.2E-24;3.8E-24;4.3E-24;7.1E-24;7.1E-24;8.2E-24;1.0E-23;1.0E-23;1.5E-23;1.5E-23;1.7E-23	lipase family protein [Paenibacillus sp. J5C2022]	2.4e-25	270	197	11	190	53.81
MGYP001011446991	alpha/beta fold hydrolase	613	2.1E-138;3.3E-130;4.2E-126;4.7E-126;1.7E-125;9.8E-119;1.0E-118;1.2E-117;6.3E-115;1.9E-36;6.2E-35;3.2E-29;3.6E-28;1.0E-27;1.5E-27;2.6E-27;4.7E-27;4.7E-27;2.0E-26;2.5E-26	alpha/beta fold hydrolase [Leptolyngbya sp. FACHB-711]	2.1e-138	661	564	25	577	61.52
MGYP001011471044	uncharacterized protein PTSG_04353	195	2.1E-46;4.1E-43;5.3E-43;1.2E-41;7.2E-37;8.3E-37;1.0E-36;1.8E-36;3.0E-36;4.3E-36;3.6E-35;6.1E-35;1.7E-33;4.5E-33;1.1E-31;1.1E-31;1.1E-31;1.1E-31;1.2E-31;1.4E-31	uncharacterized protein PTSG_04353 [Salpingoeca rosetta]	2.1e-46	320	197	3	193	62.44
MGYP001011504657	S8 family serine peptidase	287	5.0E-63;1.8E-57;2.8E-53;1.7E-52;5.2E-51;2.2E-49;1.3E-48;5.7E-48;1.3E-46;2.0E-46;2.9E-46;1.2E-43;2.2E-43;1.0E-40;5.4E-39;3.1E-38;8.0E-38;2.7E-37;5.0E-37;1.8E-36	S8 family serine peptidase [Cupriavidus sp. L7L]	5e-63	879	284	1	281	61.27
MGYP001011509485	Mbeg1-like protein	175	9.6E-20;1.0E-18;2.6E-18;2.6E-18;9.3E-18;9.3E-18;9.3E-18;2.3E-16	Mbeg1-like protein [Anaerocolumna sp. AGMB13020]	9.6e-20	544	169	3	164	55.62
MGYP001011514508	alpha/beta fold hydrolase	221	1.3E-87;7.2E-86;8.1E-85;9.5E-79;4.4E-76;4.4E-76;9.5E-76;9.5E-76;4.9E-75;5.6E-75;2.2E-74;1.1E-73;2.2E-73;3.4E-73;2.4E-66;1.2E-42;1.0E-40;1.0E-40;7.3E-40;4.4E-39	alpha/beta fold hydrolase [Halopseudomonas pertucinogena]	1.3e-87	469	214	13	221	76.17
MGYP001011892816	class 3 lipase	287	2.7E-30;2.3E-27;4.4E-27;1.5E-23;5.5E-23;7.4E-23;1.1E-22;1.4E-21;7.4E-21;8.3E-21;2.1E-20;4.2E-20;4.5E-19;1.2E-18;1.2E-18;1.6E-18;1.7E-18;2.0E-18;2.4E-18;2.4E-18	class 3 lipase [Lausannevirus]	2.7e-30	297	262	33	285	50.38
MGYP001012670568	alpha/beta hydrolase	273	3.0E-111;6.9E-110;2.0E-109;4.6E-108;2.7E-102;2.2E-94;5.1E-88;3.1E-86;3.2E-86;6.7E-86;3.0E-84;8.6E-84;1.2E-83;1.7E-83;4.9E-83;5.6E-82;5.6E-82;1.1E-81;1.6E-81;6.7E-81	alpha/beta hydrolase [Acholeplasma laidlawii]	3e-111	272	273	1	273	77.29
MGYP001012686765	alpha/beta hydrolase	272	7.8E-41;1.1E-40;8.6E-40;1.4E-37;3.1E-36;3.1E-36;4.8E-36;3.1E-35;1.9E-33;1.4E-32;2.0E-32;2.0E-32;2.1E-32;3.3E-32;3.8E-32;4.6E-32;6.4E-32;6.5E-32;9.1E-32;1.3E-31	alpha/beta hydrolase [Chroococcidiopsis sp. CCNUC1]	7.8e-41	266	266	1	265	52.63
MGYP001012910762	alpha/beta fold hydrolase	265	2.1E-90;4.0E-89;1.1E-88;1.9E-87;4.3E-86;5.8E-84;3.3E-83;1.2E-82;1.2E-82;1.7E-82;7.1E-82;2.0E-81;7.1E-80;4.7E-78;1.1E-74;6.8E-55;2.6E-37;5.6E-33;1.2E-31;3.3E-30	alpha/beta fold hydrolase [Polyangium jinanense]	2.1e-90	253	244	7	250	71.72
MGYP001012919156	alpha/beta fold hydrolase	256	2.2E-38;3.2E-38;1.2E-37;7.6E-36;6.6E-35;7.3E-34;6.2E-32;2.2E-31;2.8E-31;2.8E-31;1.2E-30;2.7E-30;3.3E-30;4.6E-30;8.9E-30;1.1E-29;2.7E-29;4.7E-29;4.9E-29;6.9E-29	alpha/beta fold hydrolase [Glycomyces sp. YM15]	2.2e-38	226	229	28	254	55.9
MGYP001013405774	alpha/beta fold hydrolase	232	9.4E-138;8.8E-131;2.2E-104;4.2E-104;3.4E-103;1.2E-78;5.2E-63;1.5E-52;5.2E-38;2.9E-37;3.0E-37;4.0E-36;5.0E-33;6.0E-33;8.0E-33;1.2E-31;1.7E-31;2.1E-31;2.3E-31;4.6E-31	alpha/beta fold hydrolase [Niveispirillum cyanobacteriorum]	9.4e-138	306	215	18	232	93.95
MGYP001013737246	alpha/beta fold hydrolase	272	2.7E-110;6.3E-109;1.3E-108;2.6E-106;1.2E-103;2.2E-101;5.7E-100;1.1E-93;1.3E-92;7.4E-92;3.0E-91;1.1E-42;3.1E-42;1.7E-41;3.4E-41;4.8E-41;6.8E-41;9.5E-41;9.9E-41;1.3E-40	alpha/beta fold hydrolase [Desulfatibacillum aliphaticivorans]	2.7e-110	297	268	5	272	72.01
MGYP001013908391	alpha/beta hydrolase	271	2.0E-91;7.8E-77;9.8E-77;3.1E-76;4.4E-76;4.4E-76;3.2E-75;4.5E-75;6.2E-75;6.4E-75;7.2E-75;7.2E-75;9.0E-75;1.4E-74;1.4E-74;1.4E-74;2.1E-74;2.1E-74;2.8E-74;5.8E-74	alpha/beta hydrolase [Vaginisenegalia massiliensis]	2e-91	260	258	10	267	72.48
MGYP001014802431	alpha/beta fold hydrolase	286	4.0E-124;3.5E-123;3.3E-121;4.6E-121;4.6E-121;4.6E-121;4.6E-121;4.6E-121;4.6E-121;4.7E-121;6.5E-121;6.7E-121;6.7E-121;9.2E-121;9.2E-121;1.1E-120;1.4E-120;1.9E-120;5.3E-120;7.4E-120	alpha/beta fold hydrolase [Lachnoclostridium sp. An138]	4e-124	459	286	1	286	76.57
MGYP001014934371	alpha/beta hydrolase	264	1.8E-174;1.5E-165;2.4E-164;8.9E-163;1.0E-161;2.1E-161;2.1E-161;7.8E-159;1.2E-158;1.5E-157;8.7E-157;9.9E-157;1.2E-156;2.2E-149;8.6E-127;8.7E-125;7.6E-121;2.2E-120;1.3E-118;5.1E-118	alpha/beta hydrolase [Undibacterium sp. 20NA77.5]	1.8e-174	270	264	1	264	95.08
MGYP001015003825	alpha/beta fold hydrolase	225	8.5E-52;5.7E-40;7.0E-25;4.7E-24;1.0E-23;1.0E-23;1.1E-23;1.0E-22;3.3E-22;9.5E-21;2.6E-20;7.2E-19;2.3E-18;2.7E-18;5.4E-17;6.9E-17;7.5E-17;7.6E-17;1.4E-16;1.5E-16	alpha/beta fold hydrolase [Caldimonas mangrovi]	8.5e-52	281	207	19	225	61.84
MGYP001015035692	alpha/beta fold hydrolase	230	2.4E-45;3.2E-44;3.1E-42;5.4E-42;3.4E-41;7.4E-41;1.9E-40;3.8E-40;6.4E-40;7.6E-40;1.1E-39;1.5E-39;2.1E-39;1.6E-38;1.7E-38;1.3E-37;7.3E-37;1.0E-36;7.4E-36;7.8E-36	alpha/beta fold hydrolase [Jidongwangia harbinensis]	2.4e-45	225	194	15	208	60.82
MGYP001015474686	alpha/beta hydrolase	285	6.9E-204;9.8E-156;1.1E-147;4.6E-98;7.7E-92;4.0E-91;1.7E-88;3.9E-86;1.6E-69;1.8E-63;1.0E-56;3.2E-55;3.2E-55;1.3E-54;1.3E-54;1.3E-54;1.3E-54;1.8E-54;2.6E-54;3.6E-54	alpha/beta hydrolase [Dokdonella sp.]	6.9e-204	285	285	1	285	100
MGYP001015483888	lecithin--cholesterol acyltransferase	403	5.0E-189;4.1E-86;1.6E-85;4.5E-85;6.4E-85;2.2E-79;6.2E-79;1.9E-77;2.2E-77;2.7E-77;2.7E-77;3.9E-77;4.1E-77;7.7E-77;1.5E-76;2.2E-76;4.3E-76;1.7E-75;3.4E-75;4.7E-75	lecithin--cholesterol acyltransferase [Calorimonas adulescens]	5e-189	403	402	1	402	78.86
MGYP001015636684	alpha/beta fold hydrolase	198	1.5E-81;3.2E-79;5.7E-79;1.9E-77;6.1E-77;1.2E-76;1.8E-75;2.0E-75;2.2E-74;1.6E-72;8.0E-72;4.8E-71;7.2E-71;5.0E-70;2.4E-69;4.8E-68;5.9E-68;7.1E-68;9.1E-68;9.7E-68	alpha/beta fold hydrolase [Niastella koreensis]	1.5e-81	228	197	1	197	77.66
MGYP001015842094	alpha/beta hydrolase	272	7.1E-81;3.8E-64;4.0E-63;3.7E-62;3.8E-62;4.6E-62;4.3E-61;7.3E-61;8.2E-61;8.5E-61;5.6E-60;6.7E-60;7.0E-60;7.6E-60;8.2E-60;1.2E-59;3.7E-59;3.7E-59;1.1E-58;1.1E-58	alpha/beta hydrolase [Candidatus Promineifilum breve]	7.1e-81	287	269	10	269	60.97
MGYP001016204047	MULTISPECIES: alpha/beta hydrolase	300	8.2E-215;2.4E-190;6.5E-188;5.9E-173;1.1E-172;2.4E-172;4.6E-172;4.9E-172;6.6E-172;9.8E-172;3.6E-171;2.6E-168;1.0E-166;5.7E-165;5.7E-165;2.3E-164;6.6E-164;6.6E-164;9.4E-164;1.9E-162	MULTISPECIES: alpha/beta hydrolase [unclassified Streptomyces]	8.2e-215	300	300	1	300	98.67
MGYP001017585474	alpha/beta fold hydrolase	265	4.0E-193;2.0E-166;2.4E-165;4.8E-165;5.2E-148;9.4E-135;2.5E-106;2.3E-105;1.9E-104;2.4E-104;2.7E-104;3.8E-104;3.8E-104;5.3E-104;5.3E-104;5.3E-104;1.5E-103;2.2E-103;3.1E-103;4.3E-103	alpha/beta fold hydrolase [Rhodothermus marinus]	4e-193	265	265	1	265	100
MGYP001017721032	alpha/beta fold hydrolase	226	1.9E-29;1.7E-28;6.1E-28;6.1E-28;3.4E-26;4.1E-25;4.1E-25;7.6E-25;1.0E-24;1.0E-24;1.0E-24;1.9E-24;2.6E-24;2.7E-24;4.9E-24;4.9E-24;4.9E-24;6.8E-24;6.8E-24;9.2E-24	alpha/beta fold hydrolase [Eisenibacter elegans]	1.9e-29	618	182	45	226	57.14
MGYP001017848092	alpha/beta hydrolase	258	8.0E-146;9.7E-133;8.7E-57;6.4E-56;1.7E-54;9.1E-54;2.6E-53;7.3E-53;3.5E-52;3.6E-52;1.1E-51;2.7E-51;3.3E-51;1.2E-50;1.2E-50;4.8E-50;1.1E-49;1.6E-49;1.7E-49;6.8E-49	alpha/beta hydrolase [Symbiobacterium terraclitae]	8e-146	257	257	1	257	87.55
MGYP001017875950	MULTISPECIES: alpha/beta hydrolase	262	2.5E-90;1.0E-89;4.1E-89;7.4E-89;7.6E-89;1.9E-87;3.6E-87;5.0E-87;5.4E-87;7.1E-87;1.4E-86;2.2E-86;6.2E-86;4.2E-85;5.0E-85;1.0E-84;1.0E-84;1.2E-84;1.4E-84;1.4E-84	MULTISPECIES: alpha/beta hydrolase [Clostridium]	2.5e-90	251	248	1	248	75
MGYP001018252293	alpha/beta hydrolase	226	1.9E-50;5.5E-50;8.7E-49;1.1E-48;1.1E-46;1.3E-45;3.9E-45;7.1E-45;7.6E-45;9.0E-45;1.5E-44;1.5E-44;1.5E-44;2.0E-44;2.1E-44;8.5E-44;9.0E-44;1.0E-43;1.3E-43;1.9E-43	alpha/beta hydrolase [Pontibacter chinhatensis]	1.9e-50	232	224	3	224	57.14
MGYP001019047961	alpha/beta fold hydrolase	301	6.7E-180;3.0E-110;1.6E-81;1.3E-80;6.0E-64;6.8E-64;1.1E-61;2.0E-60;5.6E-57;6.6E-57;1.8E-55;2.7E-55;2.7E-55;1.7E-54;1.5E-53;9.9E-53;1.3E-52;1.8E-52;2.0E-52;2.0E-52	alpha/beta fold hydrolase [Desulforhabdus sp. TSK]	6.7e-180	290	290	12	301	91.38
MGYP001019075976	triacylglycerol lipase	328	3.3E-170;1.7E-91;1.0E-90;5.6E-89;1.1E-88;1.3E-88;9.0E-88;2.3E-87;3.1E-87;3.2E-87;3.3E-87;3.3E-87;3.3E-87;3.3E-87;4.1E-87;6.0E-87;6.4E-87;6.6E-87;6.6E-87;9.0E-87	triacylglycerol lipase [Sterolibacterium denitrificans]	3.3e-170	335	335	1	328	82.69
MGYP001019710696	lipase family protein	229	1.2E-31;1.7E-29;2.4E-29;3.5E-29;6.6E-29;9.7E-29;1.9E-28;2.7E-28;2.7E-28;2.8E-28;3.7E-28;7.0E-28;1.0E-27;1.3E-27;1.3E-27;1.6E-27;1.6E-27;2.1E-27;2.2E-27;5.6E-27	lipase family protein [Pseudanabaena sp. FACHB-2040]	1.2e-31	247	183	44	215	57.38
MGYP001020795322	3-oxoadipate enol-lactonase	257	2.7E-70;3.5E-69;8.5E-67;4.3E-64;4.2E-63;2.0E-62;3.2E-61;3.4E-61;6.8E-61;2.6E-60;3.5E-60;3.5E-60;4.5E-60;9.1E-60;1.4E-59;1.5E-59;1.5E-59;2.2E-59;2.2E-59;2.3E-59	3-oxoadipate enol-lactonase [Orrella daihaiensis]	2.7e-70	259	256	1	255	61.72
MGYP001022708184	alpha/beta fold hydrolase	198	1.6E-80;3.3E-79;2.7E-78;5.0E-76;1.3E-75;1.3E-75;2.5E-75;5.8E-75;1.5E-74;6.6E-74;3.7E-73;1.0E-72;1.5E-72;1.2E-71;1.6E-71;2.1E-71;2.3E-71;3.2E-71;3.4E-71;6.8E-71	alpha/beta fold hydrolase [Dechloromonas sp. H13]	1.6e-80	290	198	1	198	73.23
MGYP001022748271	alpha/beta fold hydrolase	309	6.3E-33;1.5E-32;3.6E-32;6.0E-32;2.0E-31;2.6E-31;3.2E-31;3.4E-31;5.6E-31;8.3E-31;8.4E-31;8.4E-31;8.4E-31;8.4E-31;8.4E-31;8.4E-31;8.4E-31;8.5E-31;1.0E-30;1.2E-30	alpha/beta fold hydrolase [Actinacidiphila bryophytorum]	6.3e-33	301	198	101	288	59.6
MGYP001024129357	lipase family protein	236	4.8E-39;2.6E-38;5.1E-38;7.9E-38;1.1E-37;2.1E-36;2.0E-34;2.4E-34;7.8E-34;4.0E-33;4.7E-33;5.0E-33;6.5E-33;7.9E-33;8.4E-33;1.2E-32;4.2E-32;7.1E-32;8.3E-32;3.3E-31	lipase family protein [Tetrahymena thermophila SB210]	4.8e-39	283	199	10	205	58.29
MGYP001024209016	alpha/beta hydrolase	266	8.7E-193;1.2E-192;1.8E-192;7.2E-192;7.2E-192;1.4E-191;2.8E-189;2.8E-189;1.6E-188;4.7E-188;6.6E-188;6.6E-188;9.4E-188;1.3E-187;1.9E-187;3.8E-187;5.4E-187;7.7E-187;1.1E-186;1.6E-186	alpha/beta hydrolase [Latilactobacillus curvatus]	8.7e-193	266	266	1	266	100
MGYP001024314491	alpha/beta-hydrolase, partial	236	6.9E-21;6.9E-19;1.7E-18;1.8E-18;8.8E-18;4.7E-17;1.3E-16;1.4E-16;1.9E-16;2.0E-16;2.4E-16;3.1E-16;3.1E-16;3.2E-16;4.1E-16;4.3E-16;4.4E-16;5.9E-16;6.8E-16;6.8E-16	alpha/beta-hydrolase, partial [Linderina pennispora]	6.9e-21	239	184	52	234	51.09
MGYP001024863639	alpha/beta hydrolase	206	3.5E-90;1.1E-58;8.4E-58;1.2E-51;4.4E-47;7.8E-41;5.7E-40;6.8E-40;1.6E-39;1.1E-38;1.4E-38;5.6E-38;9.0E-38;2.5E-37;6.5E-37;1.3E-36;1.5E-36;2.4E-36;2.8E-36;3.5E-36	alpha/beta hydrolase [Bellilinea caldifistulae]	3.5e-90	273	206	1	206	78.64
MGYP001025023785	alpha/beta hydrolase	252	2.8E-75;5.1E-73;7.0E-73;1.7E-72;9.5E-71;1.3E-70;3.8E-70;1.7E-68;6.1E-68;3.9E-67;7.7E-67;8.4E-67;3.2E-66;7.7E-66;1.6E-65;3.5E-64;7.1E-64;7.1E-64;8.3E-64;2.8E-63	alpha/beta hydrolase [Sporosarcina sp. ACRSM]	2.8e-75	266	250	3	252	70
MGYP001025961018	lipase family protein	265	8.5E-73;5.6E-71;5.7E-69;7.5E-66;3.7E-64;1.4E-60;1.4E-60;1.6E-59;2.3E-59;4.3E-59;4.5E-59;6.4E-59;9.0E-59;1.3E-58;2.0E-58;2.9E-58;3.4E-58;3.6E-58;1.0E-57;1.2E-57	lipase family protein [Thiohalophilus sp.]	8.5e-73	311	252	14	265	66.67
MGYP001026106947	alpha/beta fold hydrolase	169	2.3E-72;9.0E-72;3.2E-71;3.0E-70;3.3E-70;1.0E-69;2.4E-69;3.3E-69;8.1E-69;1.3E-68;1.7E-68;2.0E-68;5.2E-68;7.0E-68;7.2E-68;7.2E-68;1.1E-67;1.4E-67;2.9E-67;7.4E-67	alpha/beta fold hydrolase [Nocardioides halotolerans]	2.3e-72	279	173	1	168	74.57
MGYP001026117026	alpha/beta hydrolase	228	4.5E-107;3.5E-105;1.2E-101;1.4E-100;1.3E-98;1.6E-97;7.0E-91;1.4E-90;1.1E-89;2.1E-80;4.6E-77;6.9E-70;8.6E-65;1.4E-64;8.1E-64;9.2E-64;1.2E-63;1.6E-63;2.2E-63;2.2E-63	alpha/beta hydrolase [Homoserinibacter sp. GY 40078]	4.5e-107	246	218	9	226	82.57
MGYP001026633343	hypothetical protein CTRG_00033	259	1.7E-83;3.1E-82;1.3E-81;3.5E-81;4.1E-81;6.0E-81;6.4E-80;1.1E-79;5.4E-79;4.4E-78;5.9E-78;9.8E-77;2.4E-76;3.8E-75;6.4E-75;1.0E-74;1.8E-74;1.8E-73;3.6E-71;1.7E-70	hypothetical protein CTRG_00033 [Candida tropicalis MYA-3404]	1.7e-83	332	262	1	259	67.94
MGYP001027604385	acylglycerol lipase protein	261	8.2E-53;4.9E-42;1.2E-29;1.9E-28	acylglycerol lipase protein [Trichomonas vaginalis G3]	8.2e-53	302	264	4	261	59.47
MGYP001027618394	alpha/beta hydrolase	270	3.5E-80;1.2E-74;4.9E-73;6.2E-64;1.5E-57;4.3E-56;1.8E-55;1.0E-53;3.2E-53;1.5E-52;1.8E-51;1.8E-51;2.0E-51;2.9E-51;4.2E-51;5.0E-51;6.8E-51;8.9E-51;1.2E-50;1.2E-50	alpha/beta hydrolase [Pelolinea submarina]	3.5e-80	263	252	12	263	65.48
MGYP001027921597	alpha/beta hydrolase	307	6.6E-119;1.5E-117;3.1E-117;4.4E-117;1.3E-116;1.0E-115;1.9E-114;1.9E-114;3.0E-114;3.1E-113;3.2E-113;8.4E-113;1.9E-112;2.6E-112;2.6E-112;5.1E-112;1.5E-111;1.9E-111;2.1E-111;2.9E-111	alpha/beta hydrolase [Chroococcidiopsis sp. SAG 2025]	6.6e-119	292	287	9	295	73.52
[truncated: 3,754 more rows]
