# Supplementary material for: Identification of novel metagenomic lipases through integrated structural and sequence-based analysis
Source: PeerJ. 2026 Feb 2;14:e20462. doi: 10.7717/peerj.20462 (PMC12875215; doi:10.7717/peerj.20462)
Supplement: Supplemental Information 4 [file peerj-14-20462-s004.xlsx]

## Sheet: triglyceride
Raw Data: Lipase activity
	Substrate	OD405	Average	% Color reduction	Average	SD
Commercial CalB
	Blank Tributyrate	0.989	1.04933	94.2503	100	5.25123
		1.097		104.543
		1.062		101.207
	Tributyrate	0.126	0.109333	12.0076	10.4193	1.42736
		0.105		10.0064
		0.097		9.24396
	Blank Tricaprylin	1.166	1.17867	98.9253	100	1.0608
		1.191		101.046
		1.179		100.028
	Tricaprylin	1.102	1.112	93.4955	94.3439	0.944756
		1.11		94.1742
		1.124		95.362
Partial purified MGL-1
	Blank Tributyrate	1.243	1.23367	100.757	100	4.50614
		1.284		104.08
		1.174		95.1635
	Tributyrate	1.193	1.14367	96.7036	92.7047	4.7441
		1.159		93.9476
		1.079		87.4628
	Blank Tricaprylin	1.058	1.155	91.6017	100	8.31304
		1.25		108.225
		1.157		100.173
	Tricaprylin	1.113	1.135	96.3636	98.2684	1.65184
		1.147		99.3074
		1.145		99.1342
Partial purified MGL-2
	Blank Tributyrate	1.243	1.23367	100.757	100	4.50614
		1.284		104.08
		1.174		95.1635
	Tributyrate	1.089	1.102	88.2734	89.3272	1.61916
		1.092		88.5166
		1.125		91.1916
	Blank Tricaprylin	1.058	1.155	91.6017	100	8.31304
		1.25		108.225
		1.157		100.173
	Tricaprylin	1.138	1.12733	98.5281	97.6046	0.804465
		1.121		97.0563
		1.123		97.2294
Partial purified MGL-3
	Blank Tributyrate	1.243	1.23367	100.757	100	4.50614
		1.284		104.08
		1.174		95.1635
	Tributyrate	1.109	1.13333	89.8946	91.8671	2.74446
		1.172		95.0014
		1.119		90.7052
	Blank Tricaprylin	1.058	1.129	93.7112	100	5.68739
		1.183		104.783
		1.146		101.506
	Tricaprylin	1.113	1.12367	98.5828	99.5276	0.837168
		1.131		100.177
		1.127		99.8229

## Sheet: pNP
Raw Data: Substrate preference analysis
	Substrate	Enzyme			Background			Enzyme activity				Activity (U/mg)			Relative activity
		Concentration	Dilution	Volumn	Blank	OD 405	OD-Blank	4-nitrophenol	Enzyme activity	Average	SD	convert	Average	SD	Relative	Average	SD
Partial purified MGL-1		mg/ml		ml				umol	umol/ml/min	U/ml			U/mg			%
	pNP-C2	0.218456	1	0.1	0.642	1.437	0.795	0.234526	3.975	4.14833	0.219393	18.1959	18.9894	1.00429	95.8216	100	5.2887
		0.218456	1	0.1		1.521	0.879	0.25945	4.395			20.1185			105.946
		0.218456	1	0.1		1.457	0.815	0.240461	4.075			18.6537			98.2322
	pNP-C4	0.218456	1	0.1	0.229	0.993	0.764	0.225328	0.764	0.725333	0.0359212	3.49728	3.32028	0.164433	18.417	17.4849	0.865919
		0.218456	1	0.1		0.922	0.693	0.204261	0.693			3.17227			16.7055
		0.218456	1	0.1		0.948	0.719	0.211976	0.719			3.29129			17.3323
	pNP-C6	0.218456	1	0.1	0.135	0.464	0.329	0.0962554	0.329	0.318333	0.00971253	1.50603	1.4572	0.04446	7.9309	7.67376	0.234131
		0.218456	1	0.1		0.445	0.31	0.0906178	0.31			1.41905			7.47288
		0.218456	1	0.1		0.451	0.316	0.0923981	0.316			1.44652			7.61752
	pNP-C8	0.218456	1	0.1	0.069	0.197	0.128	0.036615	0.128	0.138	0.00866025	0.585932	0.631707	0.0396431	3.08558	3.32664	0.208765
		0.218456	1	0.1		0.212	0.143	0.0410658	0.143			0.654595			3.44717
		0.218456	1	0.1		0.212	0.143	0.0410658	0.143			0.654595			3.44717
	pNP-C10	0.218456	1	0.1	0.066	0.242	0.176	0.0508575	0.176	0.201	0.0232594	0.805656	0.920096	0.106472	4.24267	4.84532	0.560693
		0.218456	1	0.1		0.271	0.205	0.0594623	0.205			0.938406			4.94174
		0.218456	1	0.1		0.288	0.222	0.0645066	0.222			1.01623			5.35155
	pNP-C12	0.218456	1	0.1	0.056	0.141	0.085	0.0238562	0.085	0.0976667	0.0113725	0.389095	0.447078	0.0520586	2.04902	2.35436	0.274146
		0.218456	1	0.1		0.163	0.107	0.030384	0.107			0.489802			2.57935
		0.218456	1	0.1		0.157	0.101	0.0286036	0.101			0.462337			2.43471
	pNP-C16	0.218456	1	0.1	0.058	0.152	0.094	0.0265266	0.094	0.0746667	0.0172143	0.430294	0.341793	0.0788002	2.26597	1.79992	0.41497
		0.218456	1	0.1		0.127	0.069	0.0191087	0.069			0.315854			1.66332
		0.218456	1	0.1		0.119	0.061	0.0167349	0.061			0.279233			1.47047
	Substrate	Enzyme			Background			Enzyme activity				Activity (U/mg)			Relative activity
		Concentration	Dilution	Volumn	Blank	OD 405	OD-Blank	4-nitrophenol	Enzyme activity	Average	SD	convert	Average	SD	Relative	Average	SD
Partial purified MGL-2		mg/ml		ml				umol	umol/ml/min	U/ml			U/mg			%
	pNP-C2	1.12315	1	0.1	0.642	1.448	0.806	0.23779	4.03	4.04167	0.192765	3.58814	3.59853	0.17163	99.7113	100	4.76944
		1.12315	1	0.1		1.49	0.848	0.250252	4.24			3.77511			104.907
		1.12315	1	0.1		1.413	0.771	0.227405	3.855			3.43233			95.3814
	pNP-C4	1.12315	1	0.1	0.229	0.825	0.596	0.175479	0.596	0.565333	0.0265769	0.530653	0.503348	0.023663	14.7464	13.9876	0.657574
		1.12315	1	0.1		0.778	0.549	0.161533	0.549			0.488806			13.5835
		1.12315	1	0.1		0.78	0.551	0.162127	0.551			0.490587			13.633
	pNP-C6	1.12315	1	0.1	0.135	0.545	0.41	0.12029	0.41	0.443667	0.0292632	0.365046	0.395022	0.0260547	10.1443	10.9773	0.724037
		1.12315	1	0.1		0.593	0.458	0.134532	0.458			0.407783			11.332
		1.12315	1	0.1		0.598	0.463	0.136016	0.463			0.412235			11.4557
	pNP-C8	1.12315	1	0.1	0.069	0.256	0.187	0.0541214	0.187	0.194667	0.00862168	0.166497	0.173323	0.00767637	4.6268	4.81649	0.21332
		1.12315	1	0.1		0.262	0.193	0.0559017	0.193			0.171839			4.77526
		1.12315	1	0.1		0.273	0.204	0.0591656	0.204			0.181633			5.04742
	pNP-C10	1.12315	1	0.1	0.066	0.232	0.166	0.0478903	0.166	0.162	0.00360555	0.147799	0.144238	0.00321023	4.10722	4.00825	0.0892095
		1.12315	1	0.1		0.227	0.161	0.0464067	0.161			0.143347			3.98351
		1.12315	1	0.1		0.225	0.159	0.0458133	0.159			0.141567			3.93402
	pNP-C12	1.12315	1	0.1	0.125	0.23	0.105	0.0297905	0.105	0.124333	0.0170098	0.0934875	0.110701	0.0151448	2.59794	3.07629	0.420861
		1.12315	1	0.1		0.256	0.131	0.0375052	0.131			0.116637			3.24124
		1.12315	1	0.1		0.262	0.137	0.0392855	0.137			0.121979			3.38969
	pNP-C16	1.12315	1	0.1	0.163	0.189	0.026	0.00634977	0.026	0.0336667	0.00929157	0.0231493	0.0299753	0.00827282	0.643299	0.83299	0.229895
		1.12315	1	0.1		0.194	0.031	0.00783336	0.031			0.0276011			0.76701
		1.12315	1	0.1		0.207	0.044	0.0116907	0.044			0.0391757			1.08866
	Substrate	Enzyme			Background			Enzyme activity				Activity (U/mg)			Relative activity
		Concentration	Dilution	Volumn	Blank	OD 405	OD-Blank	4-nitrophenol	Enzyme activity	Average	SD	convert	Average	SD	Relative	Average	SD
Partial purified MGL-3		mg/ml		ml				umol	umol/ml/min	U/ml			U/mg			%
	pNP-C2	0.07	1	0.1	1.37278	3.489	2.11622	0.626557	10.5811	10.2578	0.555705	151.159	146.54	7.93865	103.152	100	5.4174
		0.07	1	0.1		3.296	1.92322	0.56929	9.61611			137.373			93.7446
		0.07	1	0.1		3.488	2.11522	0.62626	10.5761			151.087			103.103
	pNP-C4	0.07	1	0.1	2.69578	2.998	0.302222	0.08831	1.51111	1.61278	0.324666	21.5873	23.0397	4.63809	14.7314	15.7225	3.16508
		0.07	1	0.1		2.966	0.270222	0.078815	1.35111			19.3016			13.1716
		0.07	1	0.1		3.091	0.395222	0.115905	1.97611			28.2302			19.2645
	pNP-C6	0.07	1	0.1	0.588444	0.422	0	0	0	0	0	0	0	0	0	0	0
		0.07	1	0.1		0.477	0	0	0			0			0
		0.07	1	0.1		0.493	0	0	0			0			0
	pNP-C8	0.07	1	0.1	0.282667	0.23	0	0	0	0	0	0	0	0	0	0	0
		0.07	1	0.1		0.237	0	0	0			0			0
		0.07	1	0.1		0.238	0	0	0			0			0
	pNP-C10	0.07	1	0.1	0.213	0.152	0	0	0	0	0	0	0	0	0	0	0
		0.07	1	0.1		0.167	0	0	0			0			0
		0.07	1	0.1		0.169	0	0	0			0			0
	pNP-C12	0.07	1	0.1	0.119333	0.092	0	0	0	0	0	0	0	0	0	0	0
		0.07	1	0.1		0.103	0	0	0			0			0
		0.07	1	0.1		0.133	0	0	0			0			0
	pNP-C16	0.07	1	0.1	0.163333	0.133	0	0	0	0	0	0	0	0	0	0	0
		0.07	1	0.1		0.141	0	0	0			0			0
		0.07	1	0.1		0.135	0	0	0			0			0
