# Supplementary material for: Identification of novel metagenomic lipases through integrated structural and sequence-based analysis
Source: PeerJ. 2026 Feb 2;14:e20462. doi: 10.7717/peerj.20462 (PMC12875215; doi:10.7717/peerj.20462)
Supplement: Supplemental Information 5 [file peerj-14-20462-s005.xlsx]

## Sheet: Opt-pH
Raw Data: Optimal pH Analysis
	Condition	Enzyme			Background			Enzyme activity				Activity (U/mg)			Relative activity
		Concentration	Dilution	Volumn	Blank	OD 405	OD-Blank	4-nitrophenol	Enzyme activity	Average	SD	convert	Average	SD	Relative	Average	SD
Partial purified MGL-1		mg/ml		ml				umol	umol/ml/min	U/ml			U/mg			%
	pH 4 Sodium acetate	0.218456	1	0.1	0.05	0.104	0.054	0.0146579	0.054	0.05	0.004	0.24719	0.22888	0.0183104	12.0896	11.194	0.895522
		0.218456	1	0.1		0.096	0.046	0.0122841	0.046			0.210569			10.2985
		0.218456	1	0.1		0.1	0.05	0.013471	0.05			0.22888			11.194
	pH 5 Sodium acetate	0.218456	1	0.1	0.121	0.24	0.119	0.0339446	0.119	0.120667	0.00208167	0.544733	0.552363	0.00952901	26.6418	27.0149	0.466045
		0.218456	1	0.1		0.244	0.123	0.0351314	0.123			0.563044			27.5373
		0.218456	1	0.1		0.241	0.12	0.0342413	0.12			0.549311			26.8657
	pH 5 K-pp	0.218456	1	0.1	0.067	0.139	0.072	0.0199988	0.072	0.079	0.006245	0.329587	0.36163	0.028587	16.1194	17.6866	1.39813
		0.218456	1	0.1		0.151	0.084	0.0235594	0.084			0.384518			18.806
		0.218456	1	0.1		0.148	0.081	0.0226693	0.081			0.370785			18.1343
	pH 6 K-pp	0.218456	1	0.1	0.076	0.151	0.075	0.020889	0.075	0.0866667	0.010116	0.343319	0.396725	0.0463069	16.791	19.403	2.26477
		0.218456	1	0.1		0.168	0.092	0.0259332	0.092			0.421138			20.597
		0.218456	1	0.1		0.169	0.093	0.0262299	0.093			0.425716			20.8209
	pH 7 K-pp	0.218456	1	0.1	0.139	0.239	0.1	0.0283069	0.2	0.238667	0.0349476	0.915518	1.09252	0.159976	44.7761	53.4328	7.82409
		0.218456	1	0.1		0.273	0.134	0.0383953	0.268			1.22679			60
		0.218456	1	0.1		0.263	0.124	0.0354282	0.248			1.13524			55.5224
	pH 7 Tris-HCI	0.218456	1	0.1	0.093	0.309	0.216	0.0627262	0.216	0.23	0.0135277	0.98876	1.05285	0.0619245	48.3582	51.4925	3.0286
		0.218456	1	0.1		0.324	0.231	0.067177	0.231			1.05742			51.7164
		0.218456	1	0.1		0.336	0.243	0.0707376	0.243			1.11235			54.403
	pH 8 Tris-HCI	0.218456	1	0.1	0.131	0.614	0.483	0.14195	0.483	0.446667	0.0315013	2.21098	2.04466	0.1442	108.134	100	7.05253
		0.218456	1	0.1		0.561	0.43	0.126224	0.43			1.96836			96.2687
		0.218456	1	0.1		0.558	0.427	0.125334	0.427			1.95463			95.597
	pH 9 Tris-HCI	0.218456	1	0.1	0.166	0.62	0.454	0.133345	0.454	0.428	0.0307896	2.07823	1.95921	0.140942	101.642	95.8209	6.8932
		0.218456	1	0.1		0.56	0.394	0.115542	0.394			1.80357			88.209
		0.218456	1	0.1		0.602	0.436	0.128004	0.436			1.99583			97.6119
	Condition	Enzyme			Background			Enzyme activity				Activity (U/mg)			Relative activity
		Concentration	Dilution	Volumn	Blank	OD 405	OD-Blank	4-nitrophenol	Enzyme activity	Average	SD	convert	Average	SD	Relative	Average	SD
Partial purified MGL-2		mg/ml		ml				umol	umol/ml/min	U/ml			U/mg			%
	pH 4 Sodium acetate	1.12315	1	0.1	0.05	0.116	0.066	0.0182185	0.066	0.0713333	0.00550757	0.0587635	0.0635121	0.0049037	8.74558	9.4523	0.729802
		1.12315	1	0.1		0.121	0.071	0.0197021	0.071			0.0632153			9.40813
		1.12315	1	0.1		0.127	0.077	0.0214824	0.077			0.0685575			10.2032
	pH 5 Sodium acetate	1.12315	1	0.1	0.121	0.391	0.27	0.078749	0.27	0.256333	0.0123423	0.240396	0.228228	0.0109891	35.7774	33.9664	1.63547
		1.12315	1	0.1		0.367	0.246	0.0716278	0.246			0.219028			32.5972
		1.12315	1	0.1		0.374	0.253	0.0737048	0.253			0.22526			33.5247
	pH 5 K-pp	1.12315	1	0.1	0.067	0.266	0.199	0.057682	0.199	0.215667	0.0152753	0.177181	0.19202	0.0136004	26.3693	28.5777	2.02411
		1.12315	1	0.1		0.296	0.229	0.0665836	0.229			0.203892			30.3445
		1.12315	1	0.1		0.286	0.219	0.0636164	0.219			0.194988			29.0194
	pH 6 K-pp	1.12315	1	0.1	0.076	0.225	0.149	0.0428461	0.149	0.168333	0.0170098	0.132663	0.149877	0.0151448	19.7438	22.3057	2.25395
		1.12315	1	0.1		0.251	0.175	0.0505608	0.175			0.155812			23.189
		1.12315	1	0.1		0.257	0.181	0.0523411	0.181			0.161155			23.9841
	pH 7 K-pp	1.12315	1	0.1	0.139	0.273	0.134	0.0383953	0.268	0.276667	0.0241937	0.238616	0.246332	0.021541	35.5124	36.6608	3.20587
		1.12315	1	0.1		0.268	0.129	0.0369118	0.258			0.229712			34.1873
		1.12315	1	0.1		0.291	0.152	0.0437363	0.304			0.270668			40.2827
	pH 7 Tris-HCI	1.12315	1	0.1	0.093	0.464	0.371	0.108718	0.742	0.754667	0.0502129	0.660645	0.671923	0.0447074	98.3216	100	6.65365
		1.12315	1	0.1		0.449	0.356	0.104267	0.712			0.633934			94.3463
		1.12315	1	0.1		0.498	0.405	0.118806	0.81			0.721189			107.332
	pH 8 Tris-HCI	1.12315	1	0.1	0.131	0.555	0.424	0.124444	0.424	0.42	0.0069282	0.377511	0.37395	0.00616857	56.1837	55.6537	0.918048
		1.12315	1	0.1		0.543	0.412	0.120883	0.412			0.366827			54.5936
		1.12315	1	0.1		0.555	0.424	0.124444	0.424			0.377511			56.1837
	pH 9 Tris-HCI	1.12315	1	0.1	0.171	0.561	0.39	0.114355	0.39	0.378667	0.0411866	0.347239	0.337148	0.0366707	51.6784	50.1767	5.45758
		1.12315	1	0.1		0.584	0.413	0.12118	0.413			0.367717			54.7261
		1.12315	1	0.1		0.504	0.333	0.0974423	0.333			0.296489			44.1254
	Condition	Enzyme			Background			Enzyme activity				Activity (U/mg)			Relative activity
		Concentration	Dilution	Volumn	Blank	OD 405	OD-Blank	4-nitrophenol	Enzyme activity	Average	SD	convert	Average	SD	Relative	Average	SD
Partial purified MGL-3		mg/ml		ml				umol	umol/ml/min	U/ml			U/mg			%
	pH 4 Sodium acetate	0.07	1	0.1	0.048	0.043	0	0	0	0	0	0	0	0	0	0	0
		0.07	1	0.1		0.041	0	0	0			0			0
		0.07	1	0.1		0.043	0	0	0			0			0
	pH 5 Sodium acetate	0.07	1	0.1	0.101	0.081	0	0	0	0	0	0	0	0	0	0	0
		0.07	1	0.1		0.081	0	0	0			0			0
		0.07	1	0.1		0.09	0	0	0			0			0
	pH 5 K-pp	0.07	1	0.1	0.07	0.055	0	0	0	0	0	0	0	0	0	0	0
		0.07	1	0.1		0.068	0	0	0			0			0
		0.07	1	0.1		0.068	0	0	0			0			0
	pH 6 K-pp	0.07	1	0.1	0.071	0.143	0.072	0.0199988	0.072	0.08	0.007	1.02857	1.14286	0.1	15.4839	17.2043	1.50538
		0.07	1	0.1		0.154	0.083	0.0232627	0.083			1.18571			17.8495
		0.07	1	0.1		0.156	0.085	0.0238562	0.085			1.21429			18.2796
	pH 7 K-pp	0.07	1	0.1	0.139	0.207	0.068	0.0188119	0.068	0.0626667	0.00472582	0.971429	0.895238	0.0675117	14.6237	13.4767	1.0163
		0.07	1	0.1		0.2	0.061	0.0167349	0.061			0.871429			13.1183
		0.07	1	0.1		0.198	0.059	0.0161415	0.059			0.842857			12.6882
	pH 7 Tris-HCI	0.07	1	0.1	0.082	0.147	0.065	0.0179218	0.065	0.066	0.00264575	0.928571	0.942857	0.0377964	13.9785	14.1935	0.568979
		0.07	1	0.1		0.146	0.064	0.0176251	0.064			0.914286			13.7634
		0.07	1	0.1		0.151	0.069	0.0191087	0.069			0.985714			14.8387
	pH 8 Tris-HCI	0.07	1	0.1	0.155	0.239	0.084	0.0235594	0.084	0.0823333	0.00152753	1.2	1.17619	0.0218218	18.0645	17.7061	0.3285
		0.07	1	0.1		0.236	0.081	0.0226693	0.081			1.15714			17.4194
		0.07	1	0.1		0.237	0.082	0.022966	0.082			1.17143			17.6344
	pH 9 Tris-HCI	0.07	1	0.1	0.197	0.544	0.347	0.101596	0.347	0.325667	0.0225906	4.95714	4.65238	0.322722	74.6237	70.0358	4.85818
		0.07	1	0.1		0.499	0.302	0.088244	0.302			4.31429			64.9462
		0.07	1	0.1		0.525	0.328	0.0959587	0.328			4.68571			70.5376
	pH 9 Glycine	0.07	1	0.1	1.503	1.599	0.096	0.0271201	0.48	0.465	0.015	6.85714	6.64286	0.214286	103.226	100	3.22581
		0.07	1	0.1		1.596	0.093	0.0262299	0.465			6.64286			100
		0.07	1	0.1		1.593	0.09	0.0253397	0.45			6.42857			96.7742
	pH10 Glycine-NaOH	0.07	1	0.1	2.042	2.063	0.021	0.00486618	0.105	0.14	0.0327872	1.5	2	0.468388	22.5806	30.1075	7.05101
		0.07	1	0.1		2.071	0.029	0.00723993	0.145			2.07143			31.1828
		0.07	1	0.1		2.076	0.034	0.00872352	0.17			2.42857			36.5591

## Sheet: Opt-Temp
Raw Data: Optimal temperature Analysis
	Condition	Enzyme			Background			Enzyme activity				Activity (U/mg)			Relative activity
		Concentration	Dilution	Volumn	Blank	OD 405	OD-Blank	4-nitrophenol	Enzyme activity	Average	SD	convert	Average	SD	Relative	Average	SD
Partial purified MGL-1		mg/ml						umol	umol/ml/min	U/ml			U/mg			%
	25˚C	0.276	1	0.1	0.138	0.245	0.107	0.030384	0.030384	0.0294938	0.00349826	0.110087	0.106862	0.0126748	24.4353	23.7194	2.81335
		0.276	1	0.1		0.229	0.091	0.0256365	0.0256365			0.0928857			20.6172
		0.276	1	0.1		0.252	0.114	0.032461	0.032461			0.117612			26.1056
	30˚C	0.276	1	0.1	0.135	0.267	0.132	0.0378019	0.0378019	0.0370107	0.00275698	0.136963	0.134097	0.00998906	30.4009	29.7646	2.21721
		0.276	1	0.1		0.254	0.119	0.0339446	0.0339446			0.122988			27.2988
		0.276	1	0.1		0.272	0.137	0.0392855	0.0392855			0.142339			31.594
	40˚C	0.276	1	0.1	0.233	0.503	0.27	0.078749	0.078749	0.0829031	0.00360973	0.285323	0.300374	0.0130787	63.3312	66.672	2.903
		0.276	1	0.1		0.523	0.29	0.0846834	0.0846834			0.306824			68.1037
		0.276	1	0.1		0.525	0.292	0.0852768	0.0852768			0.308974			68.581
	45˚C	0.276	1	0.1	0.162	0.497	0.335	0.0980357	0.0980357	0.0942773	0.00357707	0.355202	0.341584	0.0129604	78.8419	75.8193	2.87673
		0.276	1	0.1		0.483	0.321	0.0938817	0.0938817			0.340151			75.5011
		0.276	1	0.1		0.473	0.311	0.0909145	0.0909145			0.3294			73.1149
	50˚C	0.276	1	0.1	0.283	0.686	0.403	0.118213	0.118213	0.124345	0.00774505	0.428306	0.450524	0.0280618	95.0684	100	6.22869
		0.276	1	0.1		0.698	0.415	0.121773	0.121773			0.441207			97.9319
		0.276	1	0.1		0.736	0.453	0.133048	0.133048			0.48206			107
	55˚C	0.276	1	0.1	0.165	0.468	0.303	0.0885407	0.0885407	0.0900243	0.00477523	0.3208	0.326175	0.0173016	71.2059	72.399	3.84031
		0.276	1	0.1		0.491	0.326	0.0953653	0.0953653			0.345526			76.6942
		0.276	1	0.1		0.46	0.295	0.086167	0.086167			0.312199			69.2969
	60˚C	0.276	1	0.1	0.238	0.539	0.301	0.0879473	0.0879473	0.0884418	0.00255821	0.31865	0.320441	0.00926888	70.7286	71.1263	2.05735
		0.276	1	0.1		0.55	0.312	0.0912112	0.0912112			0.330475			73.3535
		0.276	1	0.1		0.533	0.295	0.086167	0.086167			0.312199			69.2969
	70˚C	0.276	1	0.1	0.29	0.588	0.298	0.0870571	0.0870571	0.086167	0.00154179	0.315424	0.312199	0.00558621	70.0127	69.2969	1.23993
		0.276	1	0.1		0.579	0.289	0.0843867	0.0843867			0.305749			67.8651
		0.276	1	0.1		0.588	0.298	0.0870571	0.0870571			0.315424			70.0127
	80˚C	0.276	1	0.1	0.217	0.502	0.285	0.0831998	0.0831998	0.0860681	0.00252356	0.301449	0.311841	0.00914333	66.9106	69.2173	2.02949
		0.276	1	0.1		0.518	0.301	0.0879473	0.0879473			0.31865			70.7286
		0.276	1	0.1		0.515	0.298	0.0870571	0.0870571			0.315424			70.0127
	90˚C	0.276	1	0.1	0.35	0.577	0.227	0.0659901	0.0659901	0.063023	0.00592694	0.239095	0.228344	0.0214744	53.0703	50.6841	4.76654
		0.276	1	0.1		0.544	0.194	0.0561984	0.0561984			0.203618			45.1957
		0.276	1	0.1		0.58	0.23	0.0668803	0.0668803			0.24232			53.7862
	Condition	Enzyme			Background			Enzyme activity				Activity (U/mg)			Relative activity
		Concentration	Dilution	Volumn	Blank	OD 405	OD-Blank	4-nitrophenol	Enzyme activity	Average	SD	convert	Average	SD	Relative	Average	SD
Partial purified MGL-2		mg/ml						umol	umol/ml/min	U/ml			U/mg			%
	25˚C	1.12315	1	0.1	0.138	0.341	0.203	0.0588689	0.0588689	0.0589678	0.0048966	0.0524143	0.0525024	0.00435972	30.9484	31.0004	2.57423
		1.12315	1	0.1		0.358	0.22	0.0639131	0.0639131			0.0569055			33.6002
		1.12315	1	0.1		0.325	0.187	0.0541214	0.0541214			0.0481874			28.4526
	30˚C	1.12315	1	0.1	0.135	0.422	0.287	0.0837932	0.0837932	0.089332	0.00634543	0.0746059	0.0795373	0.00564969	44.0516	46.9634	3.3359
		1.12315	1	0.1		0.436	0.301	0.0879473	0.0879473			0.0783045			46.2354
		1.12315	1	0.1		0.464	0.329	0.0962554	0.0962554			0.0857017			50.6032
	40˚C	1.12315	1	0.1	0.233	0.716	0.483	0.14195	0.14195	0.13651	0.00509054	0.126386	0.121543	0.0045324	74.6256	71.7658	2.67619
		1.12315	1	0.1		0.682	0.449	0.131862	0.131862			0.117404			69.322
		1.12315	1	0.1		0.695	0.462	0.135719	0.135719			0.120838			71.3498
	45˚C	1.12315	1	0.1	0.162	0.638	0.476	0.139873	0.139873	0.142939	0.00858092	0.124537	0.127267	0.00764008	73.5337	75.1456	4.51114
		1.12315	1	0.1		0.626	0.464	0.136312	0.136312			0.121367			71.6618
		1.12315	1	0.1		0.681	0.519	0.152632	0.152632			0.135897			80.2413
	50˚C	1.12315	1	0.1	0.283	0.958	0.675	0.19892	0.19892	0.190216	0.00810064	0.17711	0.16936	0.00721246	104.576	100	4.25865
		1.12315	1	0.1		0.904	0.621	0.182897	0.182897			0.162844			96.1522
		1.12315	1	0.1		0.924	0.641	0.188832	0.188832			0.168127			99.272
	55˚C	1.12315	1	0.1	0.165	0.581	0.416	0.12207	0.12207	0.127411	0.00477523	0.108686	0.113441	0.00425166	64.1743	66.9821	2.51042
		1.12315	1	0.1		0.604	0.439	0.128894	0.128894			0.114762			67.7621
		1.12315	1	0.1		0.612	0.447	0.131268	0.131268			0.116876			69.01
	60˚C	1.12315	1	0.1	0.238	0.638	0.4	0.117322	0.117322	0.115146	0.00938931	0.104459	0.102521	0.00835984	61.6785	60.5345	4.93612
		1.12315	1	0.1		0.658	0.42	0.123257	0.123257			0.109743			64.7983
		1.12315	1	0.1		0.596	0.358	0.10486	0.10486			0.093363			55.1269
	70˚C	1.12315	1	0.1	0.215	0.554	0.339	0.0992226	0.0992226	0.0996182	0.000685242	0.0883435	0.0886958	0.000610109	52.1631	52.371	0.360244
		1.12315	1	0.1		0.558	0.343	0.100409	0.100409			0.0894003			52.787
		1.12315	1	0.1		0.554	0.339	0.0992226	0.0992226			0.0883435			52.1631
	80˚C	1.12315	1	0.1	0.222	0.562	0.34	0.0995193	0.0995193	0.100706	0.00286145	0.0886077	0.0896644	0.00254771	52.3191	52.943	1.50431
		1.12315	1	0.1		0.559	0.337	0.0986292	0.0986292			0.0878151			51.8511
		1.12315	1	0.1		0.577	0.355	0.10397	0.10397			0.0925705			54.6589
	90˚C	1.12315	1	0.1	0.35	0.573	0.223	0.0648033	0.0648033	0.0689573	0.00527458	0.057698	0.0613966	0.00469626	34.0682	36.2521	2.77294
		1.12315	1	0.1		0.581	0.231	0.067177	0.067177			0.0598115			35.3161
		1.12315	1	0.1		0.607	0.257	0.0748917	0.0748917			0.0666803			39.3719
	Condition	Enzyme			Background			Enzyme activity				Activity (U/mg)			Relative activity
		Concentration	Dilution	Volumn	Blank	OD 405	OD-Blank	4-nitrophenol	Enzyme activity	Average	SD	convert	Average	SD	Relative	Average	SD
Partial purified MGL-3		mg/ml						umol	umol/ml/min	U/ml			U/mg			%
	25˚C	0.07	1	0.1	0.189	0.189	0	0	0	0	0	0	0	0	0	0	0
		0.07	1	0.1		0.189	0	0	0			0			0
		0.07	1	0.1		0.18	0	0	0			0			0
	30˚C	0.07	1	0.1	0.209	0.187	0	0	0	0	0	0	0	0	0	0	0
		0.07	1	0.1		0.209	0	0	0			0			0
		0.07	1	0.1		0.211	0	0	0			0			0
	40˚C	0.07	1	0.1	0.244	0.266	0.022	0.0051629	0.0051629	0.00545962	0.000296718	0.0737557	0.0779945	0.00423883	15.9535	16.8704	0.91687
		0.07	1	0.1		0.268	0.024	0.00575633	0.00575633			0.0822334			17.7873
		0.07	1	0.1		0.267	0.023	0.00545962	0.00545962			0.0779945			16.8704
	50˚C	0.07	1	0.1	0.283	0.331	0.048	0.0128776	0.0128776	0.0156469	0.0029869	0.183965	0.223528	0.04267	39.7922	48.3496	9.22963
		0.07	1	0.1		0.351	0.068	0.0188119	0.0188119			0.268742			58.1296
		0.07	1	0.1		0.339	0.056	0.0152513	0.0152513			0.217876			47.1271
	55˚C	0.07	1	0.1	0.283	0.375	0.092	0.0259332	0.0259332	0.0276146	0.00218714	0.370474	0.394494	0.0312449	80.1345	85.3301	6.75836
		0.07	1	0.1		0.378	0.095	0.0268233	0.0268233			0.38319			82.8851
		0.07	1	0.1		0.389	0.106	0.0300872	0.0300872			0.429818			92.9707
	60˚C	0.07	1	0.1	0.238	0.345	0.107	0.030384	0.030384	0.0323621	0.00226622	0.434056	0.462315	0.0323746	93.8875	100	7.00271
		0.07	1	0.1		0.35	0.112	0.0318675	0.0318675			0.455251			98.4719
		0.07	1	0.1		0.36	0.122	0.0348347	0.0348347			0.497639			107.641
	65˚C	0.07	1	0.1	0.253	0.293	0.04	0.0105038	0.0105038	0.0122841	0.00308359	0.150055	0.175488	0.0440512	32.4572	37.9584	9.5284
		0.07	1	0.1		0.293	0.04	0.0105038	0.0105038			0.150055			32.4572
		0.07	1	0.1		0.311	0.058	0.0158448	0.0158448			0.226354			48.9609
	70˚C	0.07	1	0.1	0.212	0.237	0.025	0.00605305	0.00605305	0.00803118	0.0017131	0.0864722	0.114731	0.0244729	18.7042	24.8166	5.29355
		0.07	1	0.1		0.247	0.035	0.00902024	0.00902024			0.128861			27.8729
		0.07	1	0.1		0.247	0.035	0.00902024	0.00902024			0.128861			27.8729
	80˚C	0.07	1	0.1	0.279	0.306	0.027	0.00664649	0.00664649	0.00803118	0.00149345	0.0949499	0.114731	0.021335	20.5379	24.8166	4.61481
		0.07	1	0.1		0.316	0.037	0.00961367	0.00961367			0.137338			29.7066
		0.07	1	0.1		0.31	0.031	0.00783336	0.00783336			0.111905			24.2054
	90˚C	0.07	1	0.1	0.365	0.283	0	0	0	0	0	0	0	0	0	0	0
		0.07	1	0.1		0.37	0	0	0			0			0
		0.07	1	0.1		0.357	0	0	0			0			0
